# Supplementary material for: Immunosuppressive Sesquiterpenoids from the Edible Mushroom Craterellus odoratus
Source: MDPI journal article supplement (doi:10.3390/jof7121052), 2021-12-08

*Supporting Information for*

## **Sesquiterpenoids from Edible Mushroom *Craterellus odoratus* and Their Immunosuppressive Activity**

Quan Dai, Fa-Lei Zhang, Zheng-Hui Li, Juan He\* and Tao Feng\*

*School of Pharmaceutical Sciences, National Demonstration Center for Experimental Ethnopharmacology Education, South-Central University for Nationalities, Wuhan 430074, People's Republic of China*

\*Corresponding author: tfeng@mail.scuec.edu.cn (T. Feng); 2015048@mail.scuec.edu.cn (J. He)

## Contents

|                                                                                                                               |     |
|-------------------------------------------------------------------------------------------------------------------------------|-----|
| Section S1. Calculational details for 1 .....                                                                                 | S4  |
| S1.1. Computational details for 1 (NMR) .....                                                                                 | S4  |
| S1.2. Computational details for 1 (ECD) .....                                                                                 | S10 |
| Section S2. Calculational details for 6 .....                                                                                 | S11 |
| S2.1. Computational details for 6 (NMR) .....                                                                                 | S11 |
| S2.2. Computational details for 6 (ECD) .....                                                                                 | S15 |
| Section S3. Calculational details for 6 <i>S</i> ,9 <i>S</i> ,14 <i>S</i> -7 and 6 <i>S</i> ,9 <i>S</i> ,14 <i>R</i> -8 ..... | S16 |
| S3.1. Computational details for 6 <i>S</i> ,9 <i>S</i> ,14 <i>S</i> -7 and 6 <i>S</i> ,9 <i>S</i> ,14 <i>R</i> -8 (NMR) ..... | S16 |
| S3.2. Computational details for 6 <i>S</i> ,9 <i>S</i> ,14 <i>R</i> -8 and 6 <i>S</i> ,9 <i>S</i> ,14 <i>S</i> -7 (ECD) ..... | S20 |
| Section S4. Calculational details for 10 .....                                                                                | S21 |
| S4.1. Computational details for 10 (ECD) .....                                                                                | S21 |
| Section S5. Calculational details for 11 .....                                                                                | S24 |
| S5.1. Computational details for 11 (NMR) .....                                                                                | S24 |
| S5.2. Computational details for 11 (ECD) .....                                                                                | S30 |
| Section S6. Calculational details for 17 .....                                                                                | S31 |
| S6.1. Computational details for 17 (ECD) .....                                                                                | S31 |
| Section S7. Calculational details for 18 .....                                                                                | S35 |
| S7.1. Computational details for 18 (ECD) .....                                                                                | S35 |
| References .....                                                                                                              | S39 |
| Section S8. NMR and MS spectra for 1 .....                                                                                    | S40 |
| Section S9. NMR and MS spectra for 2 .....                                                                                    | S47 |
| Section S10. NMR and MS spectra for 3 .....                                                                                   | S54 |
| Section S11. NMR and MS spectra for 4 .....                                                                                   | S61 |
| Section S12. NMR and MS spectra for 5 .....                                                                                   | S68 |
| Section S13. NMR and MS spectra for 6 .....                                                                                   | S75 |
| Section S14. NMR and MS spectra for 6 <i>S</i> ,9 <i>S</i> ,14 <i>S</i> -7 .....                                              | S82 |
| Section S15. NMR and MS spectra for 6 <i>S</i> ,9 <i>S</i> ,14 <i>R</i> -8 .....                                              | S89 |

|                                                     |             |
|-----------------------------------------------------|-------------|
| <b>Section S16. NMR and MS spectra for 9 .....</b>  | <b>S96</b>  |
| <b>Section S17. NMR and MS spectra for 10 .....</b> | <b>S103</b> |
| <b>Section S18. NMR and MS spectra for 11 .....</b> | <b>S110</b> |
| <b>Section S19. NMR and MS spectra for 12 .....</b> | <b>S117</b> |
| <b>Section S20. NMR and MS spectra for 13 .....</b> | <b>S124</b> |
| <b>Section S21. NMR and MS spectra for 14 .....</b> | <b>S131</b> |
| <b>Section S22. NMR and MS spectra for 15 .....</b> | <b>S138</b> |
| <b>Section S23. NMR and MS spectra for 16 .....</b> | <b>S145</b> |
| <b>Section S24. NMR and MS spectra for 17 .....</b> | <b>S152</b> |
| <b>Section S25. NMR and MS spectra for 18 .....</b> | <b>S159</b> |
| <b>Section S26. NMR and MS spectra for 19 .....</b> | <b>S166</b> |

## Section S1. Computational details for 1

### S1.1. Computational details for 1 (NMR)

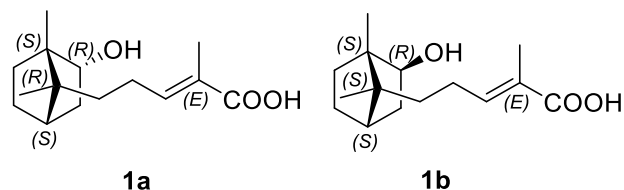

Conformation search based on molecular mechanics with MMFF force fields were performed for **1a** and **1b** gave 15 and 16 stable conformers with populations higher than 1%, respectively.<sup>1,2</sup> All these conformers were further optimized by the density functional theory method at the B3LYP/6-31G(d) level by Gaussian 16 program package.<sup>3</sup> Gauge Independent Atomic Orbital (GIAO) calculations of their <sup>1</sup>H and <sup>13</sup>C NMR chemical shifts using density functional theory (DFT) at the mPW1PW91/6-311+G(d,p) level with the PCM model in methanol. The calculated NMR data of these conformers were averaged according to the Boltzmann distribution theory and their relative Gibbs free energy. The <sup>1</sup>H and <sup>13</sup>C NMR chemical shifts for TMS were also calculated by the same procedures and used as the reference. After calculation, the experimental and calculated data were evaluated by the improved probability DP4+ method.<sup>4</sup>

**Table S1.** Energy analysis for conformers of **1aA–1aO** at B3LYP/6-31G(d) level in the gas phase

| Species    | $E'=E+ZPE$  | $E$         | $H$         | $G$         | $\Delta G$ | $\Delta E(\text{kcal/mol})$ | $PE\%$ |
|------------|-------------|-------------|-------------|-------------|------------|-----------------------------|--------|
| <b>1aA</b> | -811.346396 | -811.327397 | -811.326453 | -811.395115 | 0          | 0                           | 19.86% |
| <b>1aB</b> | -811.345763 | -811.326685 | -811.325741 | -811.395024 | 0.000091   | 0.057103                    | 18.03% |
| <b>1aC</b> | -811.346155 | -811.327270 | -811.326326 | -811.394244 | 0.000871   | 0.546561                    | 7.89%  |
| <b>1aD</b> | -811.345542 | -811.326569 | -811.325625 | -811.393639 | 0.001476   | 0.926204                    | 4.16%  |
| <b>1aE</b> | -811.346505 | -811.327616 | -811.326672 | -811.394869 | 0.000246   | 0.154367                    | 15.30% |
| <b>1aF</b> | -811.345807 | -811.326871 | -811.325927 | -811.394120 | 0.000995   | 0.624372                    | 6.92%  |
| <b>1aG</b> | -811.345696 | -811.326792 | -811.325848 | -811.393802 | 0.001313   | 0.823920                    | 4.94%  |
| <b>1aH</b> | -811.346282 | -811.327479 | -811.326535 | -811.394301 | 0.000814   | 0.510793                    | 8.38%  |
| <b>1aI</b> | -811.343685 | -811.324821 | -811.323877 | -811.391425 | 0.003690   | 2.315510                    | 0.40%  |
| <b>1aJ</b> | -811.344259 | -811.325515 | -811.324570 | -811.391727 | 0.003388   | 2.126002                    | 0.55%  |
| <b>1aK</b> | -811.345655 | -811.326666 | -811.325721 | -811.394425 | 0.000690   | 0.432982                    | 9.56%  |



|            |             |             |             |             |          |          |       |
|------------|-------------|-------------|-------------|-------------|----------|----------|-------|
| <b>1aL</b> | -811.342392 | -811.323667 | -811.322723 | -811.389609 | 0.005506 | 3.455067 | 0.06% |
| <b>1aM</b> | -811.345470 | -811.326570 | -811.325626 | -811.393508 | 0.001607 | 1.008408 | 3.62% |
| <b>1aN</b> | -811.343690 | -811.324969 | -811.324025 | -811.390977 | 0.004138 | 2.596634 | 0.25% |
| <b>1aO</b> | -811.343007 | -811.324371 | -811.323427 | -811.390108 | 0.005007 | 3.141940 | 0.10% |

*E*, *E'*, *H*, *G*: total energy, total energy with zero point energy (*ZPE*), enthalpy, and Gibbs free energy

**Figure S1.** Main conformers of **1a** in NMR and ECD calculations.

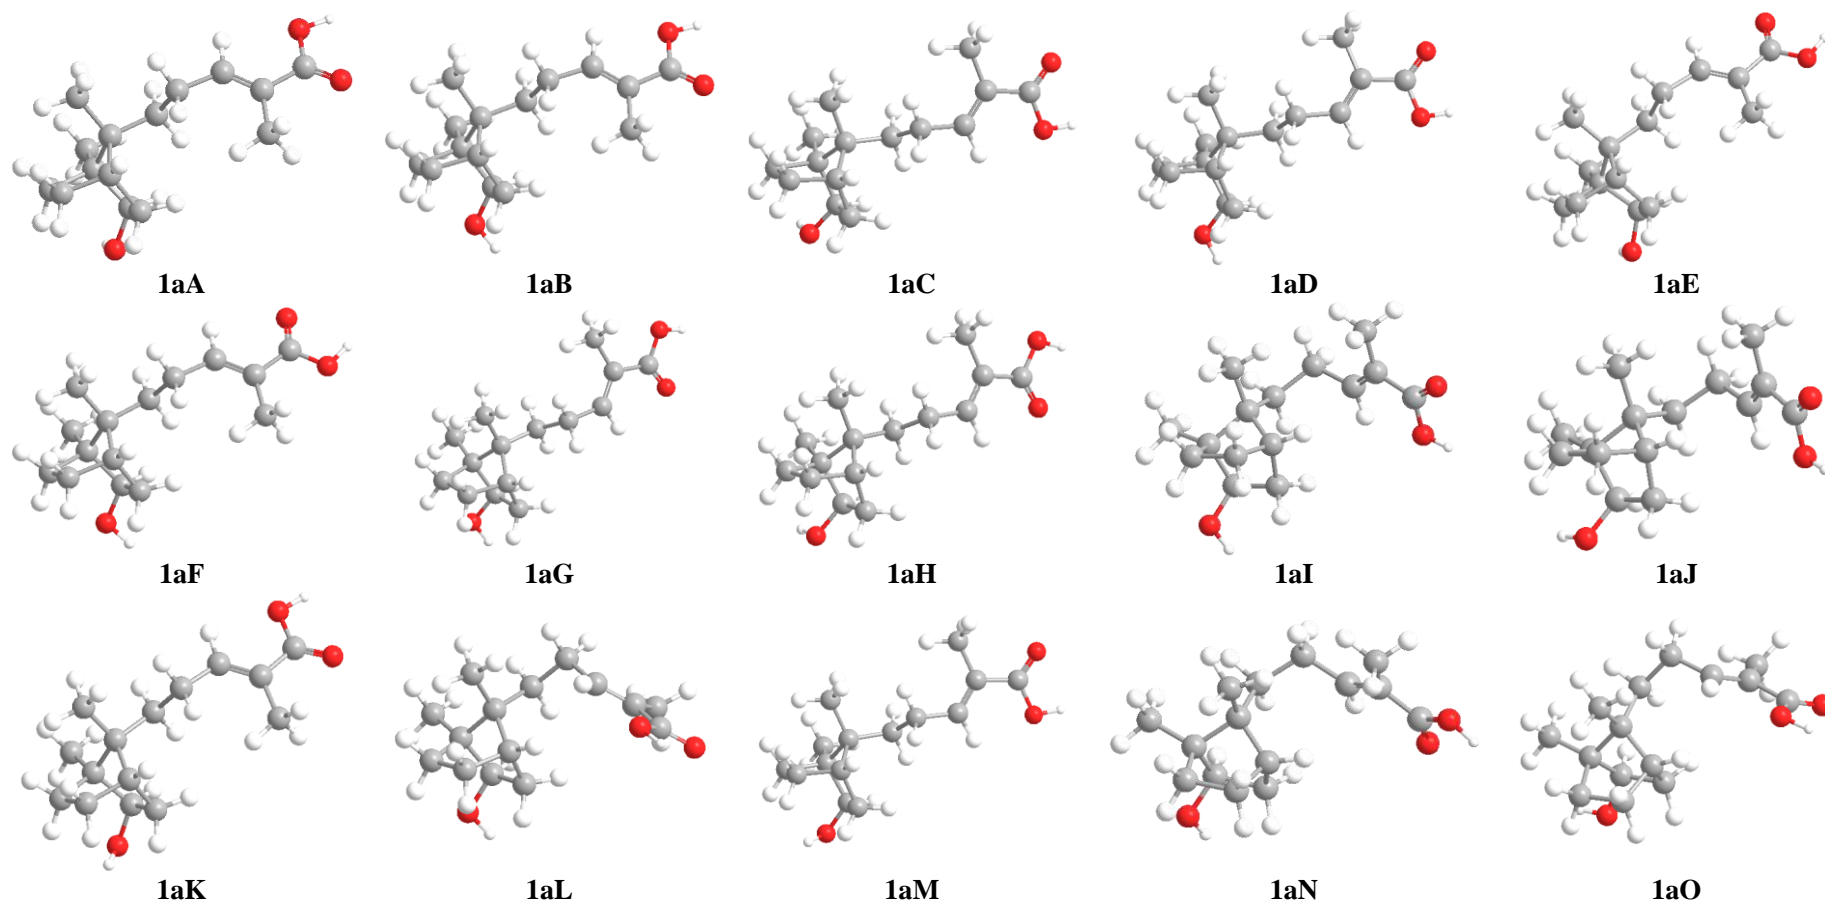

**Table S2.** Energy analysis for conformers of **1bA–1bP** at B3LYP/6-31G(d) level in the gas phase

| Species    | $E'=E+ZPE$  | $E$         | $H$         | $G$         | $\Delta G$ | $\Delta E(\text{kcal/mol})$ | $PE\%$ |
|------------|-------------|-------------|-------------|-------------|------------|-----------------------------|--------|
| <b>1bA</b> | -811.345766 | -811.326731 | -811.325786 | -811.394434 | 0.000619   | 0.388428                    | 14.06% |
| <b>1bB</b> | -811.346763 | -811.327870 | -811.326926 | -811.395053 | 0          | 0                           | 27.10% |
| <b>1bC</b> | -811.345556 | -811.326611 | -811.325667 | -811.393516 | 0.001537   | 0.964482                    | 5.32%  |
| <b>1bD</b> | -811.346640 | -811.327785 | -811.326841 | -811.394428 | 0.000625   | 0.392193                    | 13.97% |
| <b>1bE</b> | -811.346793 | -811.328048 | -811.327104 | -811.394436 | 0.000617   | 0.387173                    | 14.09% |
| <b>1bF</b> | -811.345728 | -811.326874 | -811.325929 | -811.393457 | 0.001596   | 1.001505                    | 4.99%  |
| <b>1bG</b> | -811.345653 | -811.326791 | -811.325847 | -811.393483 | 0.001570   | 0.985190                    | 5.13%  |
| <b>1bH</b> | -811.343373 | -811.324551 | -811.323607 | -811.390913 | 0.004140   | 2.597889                    | 0.34%  |
| <b>1bI</b> | -811.342002 | -811.323287 | -811.322343 | -811.389135 | 0.005918   | 3.713601                    | 0.05%  |
| <b>1bJ</b> | -811.346722 | -811.327950 | -811.327006 | -811.394361 | 0.000692   | 0.434237                    | 13.02% |
| <b>1bK</b> | -811.344366 | -811.325637 | -811.324693 | -811.391957 | 0.003096   | 1.942769                    | 1.02%  |
| <b>1bL</b> | -811.343380 | -811.324693 | -811.323749 | -811.390469 | 0.004584   | 2.876504                    | 0.21%  |
| <b>1bM</b> | -811.343062 | -811.324413 | -811.323469 | -811.390130 | 0.004923   | 3.089229                    | 0.15%  |
| <b>1bN</b> | -811.343313 | -811.324423 | -811.323479 | -811.390889 | 0.004164   | 2.612950                    | 0.33%  |
| <b>1bO</b> | -811.342109 | -811.323443 | -811.322498 | -811.389226 | 0.005827   | 3.656498                    | 0.06%  |
| <b>1bP</b> | -811.343167 | -811.324573 | -811.323629 | -811.390197 | 0.004856   | 3.047186                    | 0.16%  |

$E$ ,  $E'$ ,  $H$ ,  $G$ : total energy, total energy with zero point energy ( $ZPE$ ), enthalpy, and Gibbs free energy

**Figure S2.** Main conformers of **1b** in NMR calculation.

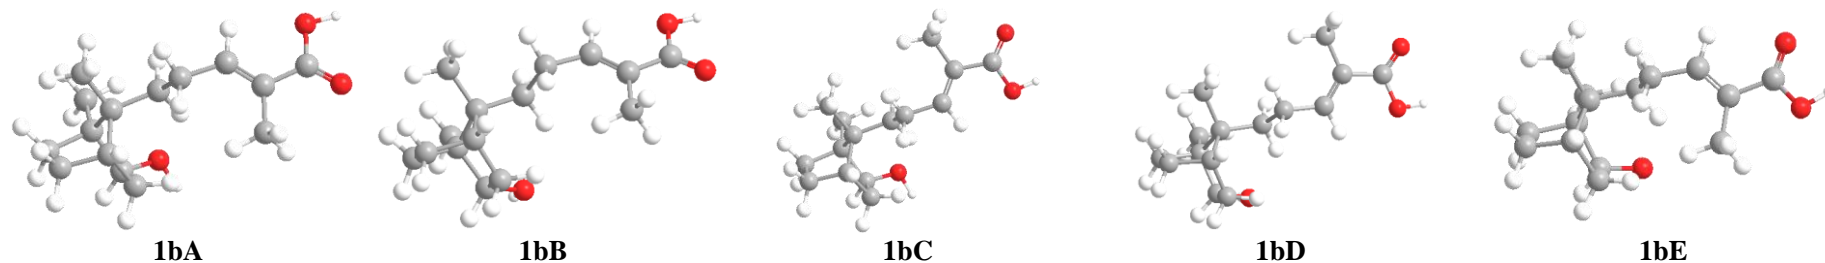

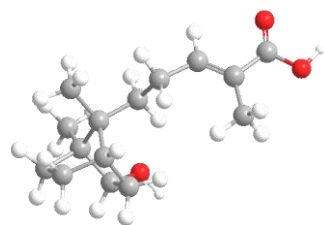

**1bF**

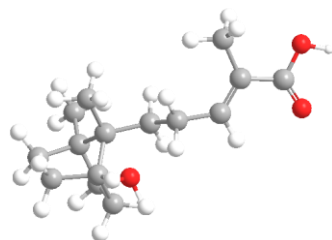

**1bG**

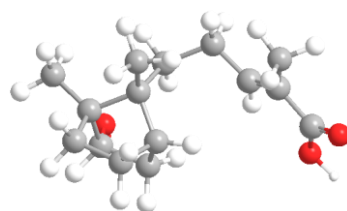

**1bH**

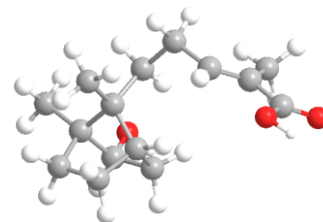

**1bI**

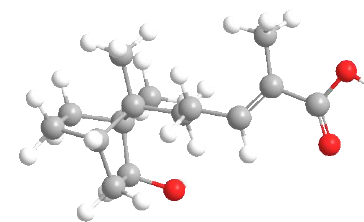

**1bJ**

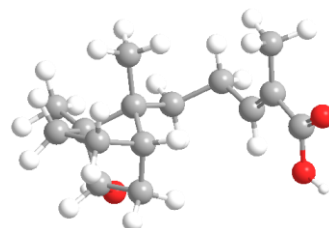

**1bK**

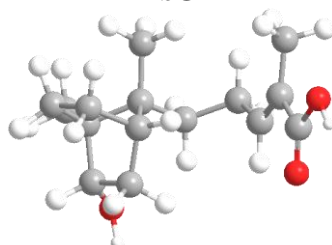

**1bL**

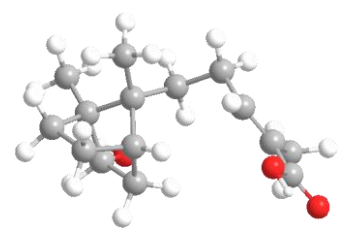

**1bM**

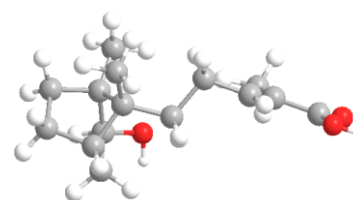

**1bN**

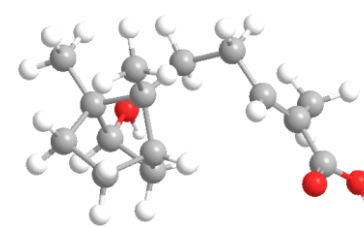

**1bO**

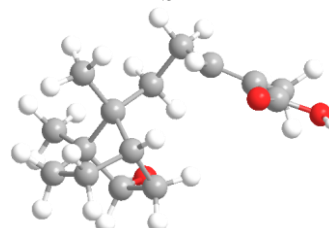

**1bP**

**Table S3.** DP4+ analysis results of **1a** (Isomer 1) and **1b** (Isomer 2) with **1**

|    | A          | B    | C            | D        | E            | F        | G                 | H        |
|----|------------|------|--------------|----------|--------------|----------|-------------------|----------|
| 1  | Functional |      | Solvent?     |          | Basis Set    |          | Type of Data      |          |
| 2  | mPW1PW91   |      | PCM          |          | 6-311+G(d,p) |          | Shielding Tensors |          |
| 3  |            |      |              |          |              |          |                   |          |
| 12 |            |      | DP4+         | 100.00%  | 0.00%        | —        | —                 | —        |
| 14 | Nuclei     | sp2? | Experimental | Isomer 1 | Isomer 2     | Isomer 3 | Isomer 4          | Isomer 5 |
| 15 | C          |      | 49.9         | 131.3    | 131.5        |          |                   |          |
| 16 | C          |      | 76.3         | 106.4    | 103.1        |          |                   |          |
| 17 | C          |      | 37.6         | 146.4    | 145.3        |          |                   |          |
| 18 | C          |      | 41.9         | 140.7    | 141.4        |          |                   |          |
| 19 | C          |      | 27.5         | 156.6    | 157.3        |          |                   |          |
| 20 | C          |      | 25.8         | 158.9    | 150.9        |          |                   |          |
| 21 | C          |      | 50.9         | 130.1    | 132.2        |          |                   |          |
| 22 | C          |      | 30.9         | 153.2    | 153.3        |          |                   |          |
| 23 | C          |      | 24.5         | 157.6    | 158.2        |          |                   |          |
| 24 | C          | x    | 141.1        | 29.1     | 28.4         |          |                   |          |
| 25 | C          | x    | 128.5        | 55.5     | 56.0         |          |                   |          |
| 26 | C          | x    | 171.3        | 11.6     | 11.5         |          |                   |          |
| 27 | C          |      | 11.2         | 173.4    | 173.5        |          |                   |          |
| 28 | C          |      | 15.5         | 169.8    | 170.0        |          |                   |          |
| 29 | C          |      | 12.3         | 173.4    | 175.6        |          |                   |          |
| 30 |            |      |              |          |              |          |                   |          |
| 31 | H          |      | 4.02         | 27.67    | 28.06        |          |                   |          |
| 32 | H          |      | 2.16         | 29.53    | 30.00        |          |                   |          |
| 33 | H          |      | 1            | 30.81    | 30.13        |          |                   |          |
| 34 | H          |      | 1.79         | 29.95    | 29.93        |          |                   |          |
| 35 | H          |      | 1.27         | 30.05    | 30.09        |          |                   |          |
| 36 | H          |      | 1.69         | 30.49    | 30.70        |          |                   |          |
| 37 | H          |      | 1.23         | 29.67    | 30.85        |          |                   |          |
| 38 | H          |      | 1.97         | 30.47    | 30.21        |          |                   |          |
| 39 | H          |      | 1.46         | 30.48    | 29.21        |          |                   |          |
| 40 | H          |      | 1.17         | 30.58    | 30.81        |          |                   |          |
| 41 | H          |      | 2.07         | 29.42    | 29.43        |          |                   |          |
| 42 | H          |      | 2.25         | 29.55    | 29.49        |          |                   |          |
| 43 | H          | x    | 6.69         | 24.30    | 24.29        |          |                   |          |
| 44 | H          |      | 1.8          | 29.69    | 29.65        |          |                   |          |
| 45 | H          |      | 1.8          | 30.02    | 30.02        |          |                   |          |
| 46 | H          |      | 1.8          | 30.05    | 30.04        |          |                   |          |
| 47 | H          |      | 0.93         | 31.11    | 31.10        |          |                   |          |
| 48 | H          |      | 0.93         | 30.65    | 30.90        |          |                   |          |
| 49 | H          |      | 0.93         | 30.64    | 30.53        |          |                   |          |
| 50 | H          |      | 0.85         | 30.96    | 30.67        |          |                   |          |
| 51 | H          |      | 0.85         | 30.74    | 30.98        |          |                   |          |
| 52 | H          |      | 0.85         | 30.99    | 30.92        |          |                   |          |

|    | A                | B | C                                                                                         | D                                                                                       | E            | F        | G                 | H        |
|----|------------------|---|-------------------------------------------------------------------------------------------|-----------------------------------------------------------------------------------------|--------------|----------|-------------------|----------|
| 1  | Functional       |   | Solvent?                                                                                  |                                                                                         | Basis Set    |          | Type of Data      |          |
| 2  | mPVP91           |   | PCII                                                                                      |                                                                                         | 6-311+G(d,p) |          | Shielding Tensors |          |
| 3  |                  |   |                                                                                           |                                                                                         |              |          |                   |          |
| 4  |                  |   | Isomer 1                                                                                  | Isomer 2                                                                                | Isomer 3     | Isomer 4 | Isomer 5          | Isomer 6 |
| 5  | sDP4+ (H data)   |   |  100.00% |  0.00% | –            | –        | –                 | –        |
| 6  | sDP4+ (C data)   |   |  99.96%  |  0.04% | –            | –        | –                 | –        |
| 7  | sDP4+ (all data) |   |  100.00% |  0.00% | –            | –        | –                 | –        |
| 8  | uDP4+ (H data)   |   |  99.99%  |  0.01% | –            | –        | –                 | –        |
| 9  | uDP4+ (C data)   |   |  99.99%  |  0.01% | –            | –        | –                 | –        |
| 10 | uDP4+ (all data) |   |  100.00% |  0.00% | –            | –        | –                 | –        |
| 11 | DP4+ (H data)    |   |  100.00% |  0.00% | –            | –        | –                 | –        |
| 12 | DP4+ (C data)    |   |  100.00% |  0.00% | –            | –        | –                 | –        |
| 13 | DP4+ (all data)  |   |  100.00% |  0.00% | –            | –        | –                 | –        |

### S1.2. Computational details for **1** (ECD)

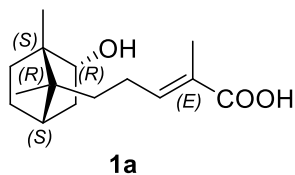

Conformation search based on molecular mechanics with MMFF force fields were performed for **1a** gave 15 stable conformers with populations higher than 1%. All these conformers were further optimized by the density functional theory method at the B3LYP/6-31G(d) level by Gaussian 16 program package. The ECD were calculated using density functional theory (TDDFT) at B3LYP/6-31+G(d) level in methanol with IEFPCM model. The calculated ECD curves were all generated using SpecDis 1.71 with  $\sigma = 0.30$  eV, UV shift -10 nm.<sup>5</sup>

**Figure S3.** Comparison of the calculated ECD spectra for possible structure with the experimental spectrum of **1** in methanol with PCM model.

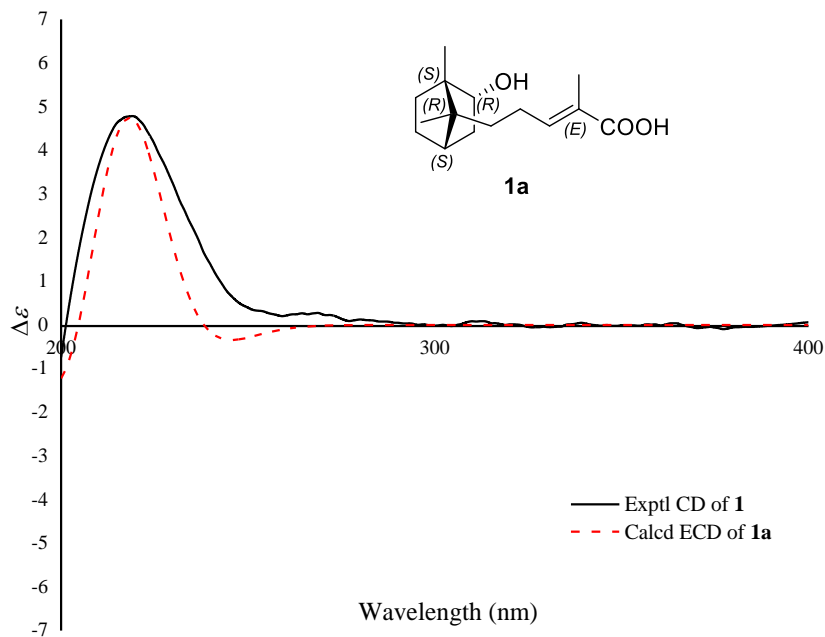

## Section S2. Computational details for **6**

### S2.1. Computational details for **6** (NMR)

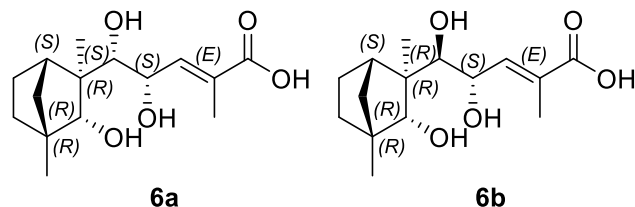

Conformation search based on molecular mechanics with MMFF force fields were performed for **6a** and **6b** gave 14 and 6 stable conformers with populations higher than 1%, respectively. All these conformers were further optimized by the density functional theory method at the B3LYP/6-31G(d) level by Gaussian 16 program package. Gauge Independent Atomic Orbital (GIAO) calculations of their  $^1\text{H}$  and  $^{13}\text{C}$  NMR chemical shifts using density functional theory (DFT) at the mPW1PW91/6-311+G(d,p) level with the PCM model in methanol. The calculated NMR data of these conformers were averaged according to the Boltzmann distribution theory and their relative Gibbs free energy. The  $^1\text{H}$  and  $^{13}\text{C}$  NMR chemical shifts for TMS were also calculated by the same procedures and used as the reference. After calculation, the experimental and calculated data were evaluated by the improved probability DP4+ method.

**Table S4.** Energy analysis for conformers of **6aA–6aN** at B3LYP/6-31G(d) level in the gas phase

| Species    | $E'=E+ZPE$  | $E$         | $H$         | $G$         | $\Delta G$ | $\Delta E(\text{kcal/mol})$ | $PE\%$ |
|------------|-------------|-------------|-------------|-------------|------------|-----------------------------|--------|
| <b>6aA</b> | -961.762350 | -961.741395 | -961.740451 | -961.811097 | 0.002207   | 1.384913                    | 3.09%  |
| <b>6aB</b> | -961.762329 | -961.741476 | -961.740532 | -961.810880 | 0.002424   | 1.521083                    | 2.45%  |
| <b>6aC</b> | -961.763374 | -961.742292 | -961.741348 | -961.813304 | 0          | 0                           | 32.01% |
| <b>6aD</b> | -961.763197 | -961.742209 | -961.741264 | -961.812730 | 0.000574   | 0.360190                    | 17.42% |
| <b>6aE</b> | -961.763360 | -961.742398 | -961.741453 | -961.812880 | 0.000424   | 0.266064                    | 20.42% |
| <b>6aF</b> | -961.762085 | -961.741187 | -961.740243 | -961.810939 | 0.002365   | 1.484060                    | 2.61%  |
| <b>6aG</b> | -961.761002 | -961.740193 | -961.739249 | -961.809492 | 0.003812   | 2.392066                    | 0.56%  |
| <b>6aH</b> | -961.761637 | -961.740848 | -961.739904 | -961.810356 | 0.002948   | 1.849898                    | 1.41%  |
| <b>6aI</b> | -961.762385 | -961.741255 | -961.740311 | -961.812327 | 0.000977   | 0.613077                    | 11.37% |
| <b>6aJ</b> | -961.761694 | -961.741115 | -961.740171 | -961.809567 | 0.003737   | 2.345003                    | 0.61%  |
| <b>6aK</b> | -961.761297 | -961.740323 | -961.739379 | -961.810997 | 0.002307   | 1.447664                    | 2.78%  |
| <b>6aL</b> | -961.762100 | -961.741290 | -961.740346 | -961.810727 | 0.002577   | 1.617092                    | 2.09%  |
| <b>6aM</b> | -961.763188 | -961.742920 | -961.741975 | -961.810351 | 0.002953   | 1.853036                    | 1.40%  |
| <b>6aN</b> | -961.761903 | -961.741079 | -961.740135 | -961.810582 | 0.002722   | 1.708081                    | 1.79%  |

$E$ ,  $E'$ ,  $H$ ,  $G$ : total energy, total energy with zero point energy ( $ZPE$ ), enthalpy, and Gibbs free energy

**Figure S4.** Main conformers of **6a** in NMR calculation.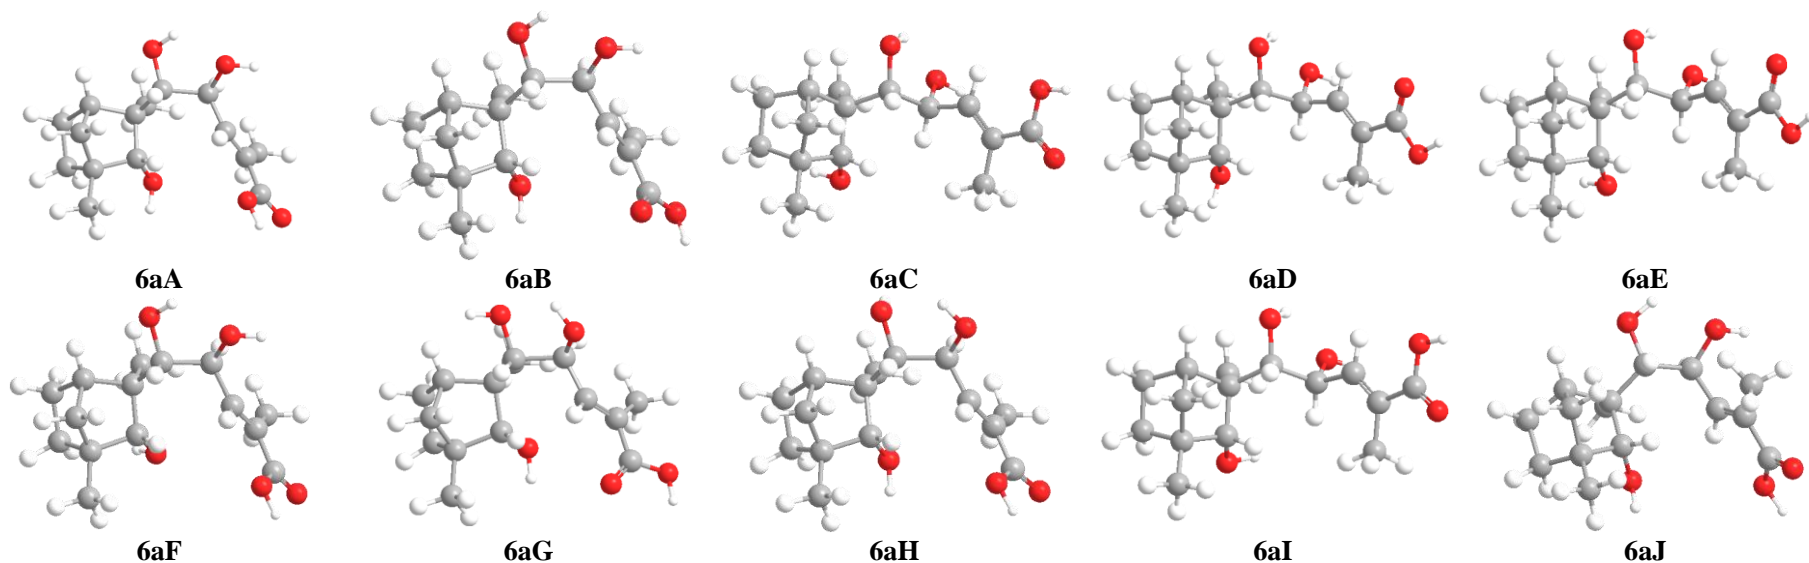



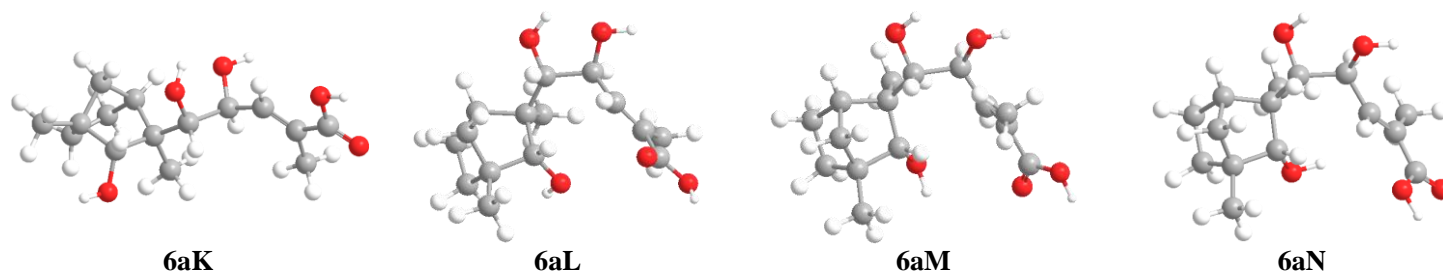

**Table S5.** Energy analysis for conformers of **6bA–6bF** at B3LYP/6-31G(d) level in the gas phase

| Species    | $E'=E+ZPE$  | $E$         | $H$         | $G$         | $\Delta G$ | $\Delta E(\text{kcal/mol})$ | $PE\%$ |
|------------|-------------|-------------|-------------|-------------|------------|-----------------------------|--------|
| <b>6bA</b> | -961.759791 | -961.738977 | -961.738032 | -961.808480 | 0.003372   | 2.115962                    | 1.60%  |
| <b>6bB</b> | -961.759853 | -961.739083 | -961.738139 | -961.808436 | 0.003416   | 2.143572                    | 1.53%  |
| <b>6bC</b> | -961.762214 | -961.741234 | -961.740290 | -961.811852 | 0          | 0                           | 57.17% |
| <b>6bD</b> | -961.762236 | -961.741352 | -961.740407 | -961.811482 | 0.000370   | 0.232179                    | 38.63% |
| <b>6bE</b> | -961.758853 | -961.738074 | -961.737130 | -961.807592 | 0.004260   | 2.673190                    | 0.63%  |
| <b>6bF</b> | -961.758789 | -961.738105 | -961.737160 | -961.807263 | 0.004589   | 2.879641                    | 0.44%  |

$E$ ,  $E'$ ,  $H$ ,  $G$ : total energy, total energy with zero point energy ( $ZPE$ ), enthalpy, and Gibbs free energy

**Figure S5.** Main conformers of **6b** in NMR and ECD calculations.

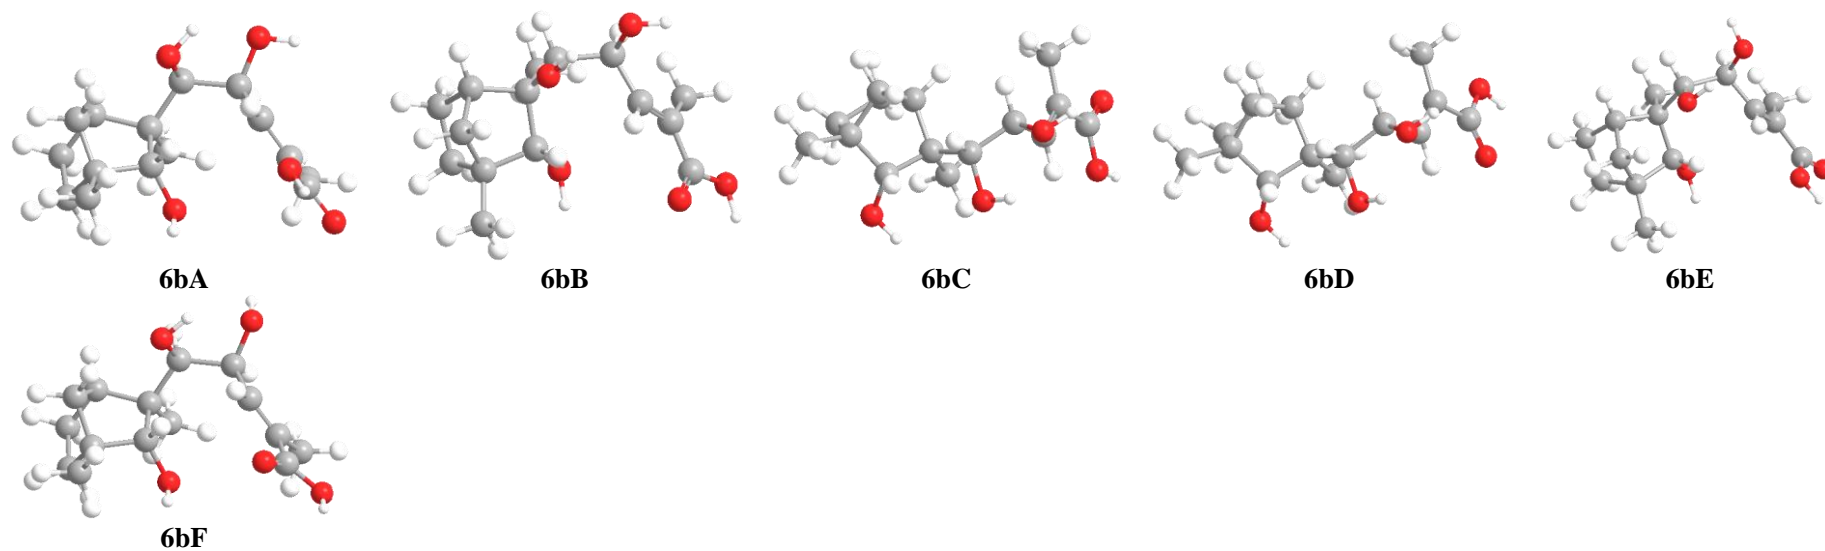

**Table S6.** DP4+ analysis results of **6a** (Isomer 1) and **6b** (Isomer 2) with **6**

|    | A          | B    | C           | D        | E             | F        | G                 | H        |
|----|------------|------|-------------|----------|---------------|----------|-------------------|----------|
| 1  | Functional |      | Solvent?    |          | Basis Set     |          | Type of Data      |          |
| 2  | mPW1PW91   |      | PCM         |          | 6-311+G(d, p) |          | Shielding Tensors |          |
| 3  |            |      |             |          |               |          |                   |          |
| 12 |            |      | DP4+        | 0.00%    | 100.00%       | –        | –                 | –        |
| 14 | Nuclei     | sp2? | xperimental | Isomer 1 | Isomer 2      | Isomer 3 | Isomer 4          | Isomer 5 |
| 15 | C          |      | 49.8        | 133.4    | 134.1         |          |                   |          |
| 16 | C          |      | 82.2        | 103.1    | 100.4         |          |                   |          |
| 17 | C          |      | 47.8        | 134.1    | 136.8         |          |                   |          |
| 18 | C          |      | 44.7        | 139.4    | 139.4         |          |                   |          |
| 19 | C          |      | 27.6        | 158.2    | 158.2         |          |                   |          |
| 20 | C          |      | 26.7        | 159.4    | 159.5         |          |                   |          |
| 21 | C          |      | 41.5        | 145.1    | 144.0         |          |                   |          |
| 22 | C          |      | 80.5        | 107.7    | 104.1         |          |                   |          |
| 23 | C          |      | 70.6        | 117.3    | 115.5         |          |                   |          |
| 24 | C          | x    | 138.4       | 36.2     | 37.0          |          |                   |          |
| 25 | C          | x    | 135.7       | 52.5     | 51.5          |          |                   |          |
| 26 | C          | x    | 176.1       | 11.3     | 11.6          |          |                   |          |
| 27 | C          |      | 14.3        | 172.7    | 172.8         |          |                   |          |
| 28 | C          |      | 19.9        | 175.0    | 175.1         |          |                   |          |
| 29 | C          |      | 12.2        | 167.4    | 166.8         |          |                   |          |

|    | A                | B | C        | D        | E             | F        | G                 | H        |
|----|------------------|---|----------|----------|---------------|----------|-------------------|----------|
| 1  | Functional       |   | Solvent? |          | Basis Set     |          | Type of Data      |          |
| 2  | mPW1PW91         |   | PCM      |          | 6-311+G(d, p) |          | Shielding Tensors |          |
| 3  |                  |   |          |          |               |          |                   |          |
| 4  |                  |   | Isomer 1 | Isomer 2 | Isomer 3      | Isomer 4 | Isomer 5          | Isomer 6 |
| 5  | sDP4+ (H data)   |   | –        | –        | –             | –        | –                 | –        |
| 6  | sDP4+ (C data)   |   | 0.60%    | 99.40%   | –             | –        | –                 | –        |
| 7  | sDP4+ (all data) |   | 0.60%    | 99.40%   | –             | –        | –                 | –        |
| 8  | uDP4+ (H data)   |   | –        | –        | –             | –        | –                 | –        |
| 9  | uDP4+ (C data)   |   | 0.14%    | 99.86%   | –             | –        | –                 | –        |
| 10 | uDP4+ (all data) |   | 0.14%    | 99.86%   | –             | –        | –                 | –        |
| 11 | DP4+ (H data)    |   | –        | –        | –             | –        | –                 | –        |
| 12 | DP4+ (C data)    |   | 0.00%    | 100.00%  | –             | –        | –                 | –        |
| 13 | DP4+ (all data)  |   | 0.00%    | 100.00%  | –             | –        | –                 | –        |

## S2.2. Computational details for **6** (ECD)

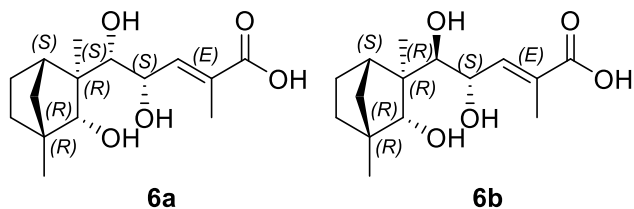

Conformation search based on molecular mechanics with MMFF force fields were performed for **6b** gave 6 stable conformers with populations higher than 1%. All these conformers were further optimized by the density functional theory method at the B3LYP/6-31G(d) level by Gaussian 16 program package. The ECD were calculated using density functional theory (TDDFT) at B3LYP/6-31+G(d) level in methanol with IEFPCM model. The calculated ECD curves were all generated using SpecDis 1.71.

**Figure S6.** Comparison of the calculated ECD spectra for possible structure with the experimental spectrum of **6** in methanol with PCM model.

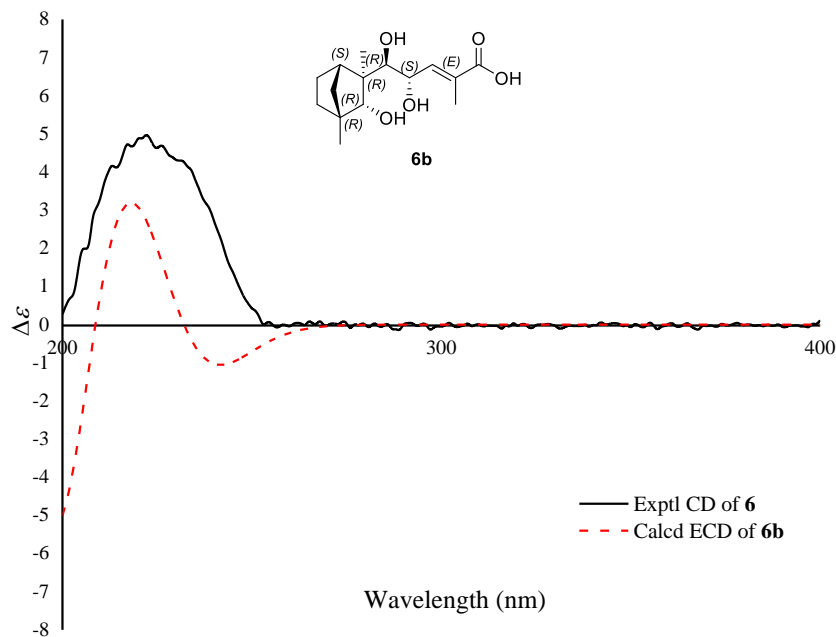

## Section S3. Computational details for 6*S*,9*S*,14*S*-**7** and 6*S*,9*S*,14*R*-**8**

### S3.1. Computational details for 6*S*,9*S*,14*S*-**7** and 6*S*,9*S*,14*R*-**8** (NMR)

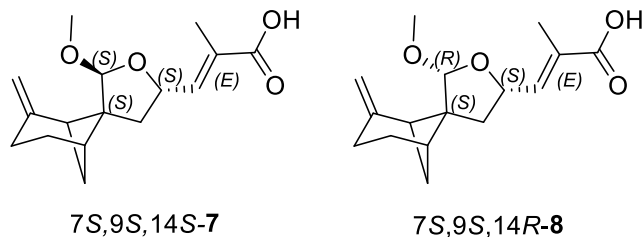

Conformation search based on molecular mechanics with MMFF force fields were performed for 7*S*,9*S*,14*S*-**7** and 7*S*,9*S*,14*R*-**8** gave 5 and 6 stable conformers with populations higher than 1%, respectively. All these conformers were further optimized by the density functional theory method at the B3LYP/6-31G(d) level by Gaussian 16 program package. Gauge Independent Atomic Orbital (GIAO) calculations of their <sup>1</sup>H and <sup>13</sup>C NMR chemical shifts using density functional theory (DFT) at the mPW1PW91/6-311+G(d,p) level with the PCM model in methanol. The calculated NMR data of these conformers were averaged according to the Boltzmann distribution theory and their relative Gibbs free energy. The <sup>1</sup>H and <sup>13</sup>C NMR chemical shifts for TMS were also calculated by the same procedures and used as the reference. After calculation, the experimental and calculated data were evaluated by linear correlation coefficients (*R*<sup>2</sup>) and the improved probability DP4+ method.

**Table S7.** Energy analysis for conformers of 7*S*,9*S*,14*R*-**8A**–7*S*,9*S*,14*R*-**8F** at B3LYP/6-31G(d) level in the gas phase

| Species                                         | <i>E'</i> = <i>E</i> + <i>ZPE</i> | <i>E</i>    | <i>H</i>    | <i>G</i>    | <i>ΔG</i> | <i>ΔE</i> (kcal/mol) | <i>PE</i> % |
|-------------------------------------------------|-----------------------------------|-------------|-------------|-------------|-----------|----------------------|-------------|
| 7 <i>S</i> ,9 <i>S</i> ,14 <i>R</i> - <b>8A</b> | -923.429467                       | -923.409966 | -923.409022 | -923.478920 | 0.000002  | 0.001255             | 25.87%      |
| 7 <i>S</i> ,9 <i>S</i> ,14 <i>R</i> - <b>8B</b> | -923.429467                       | -923.409966 | -923.409022 | -923.478922 | 0         | 0                    | 25.92%      |
| 7 <i>S</i> ,9 <i>S</i> ,14 <i>R</i> - <b>8C</b> | -923.429472                       | -923.410060 | -923.409116 | -923.478765 | 0.000157  | 0.098519             | 21.95%      |
| 7 <i>S</i> ,9 <i>S</i> ,14 <i>R</i> - <b>8D</b> | -923.429466                       | -923.409965 | -923.409021 | -923.478917 | 0.000005  | 0.003138             | 25.78%      |
| 7 <i>S</i> ,9 <i>S</i> ,14 <i>R</i> - <b>8E</b> | -923.424220                       | -923.404699 | -923.403755 | -923.474439 | 0.004483  | 2.813125             | 0.22%       |
| 7 <i>S</i> ,9 <i>S</i> ,14 <i>R</i> - <b>8F</b> | -923.425652                       | -923.406341 | -923.405397 | -923.474571 | 0.004351  | 2.730294             | 0.26%       |

*E*, *E'*, *H*, *G*: total energy, total energy with zero point energy (*ZPE*), enthalpy, and Gibbs free energy

**Figure S7.** Main conformers of 7*S*,9*S*,14*R*-**8** in NMR and ECD calculations.

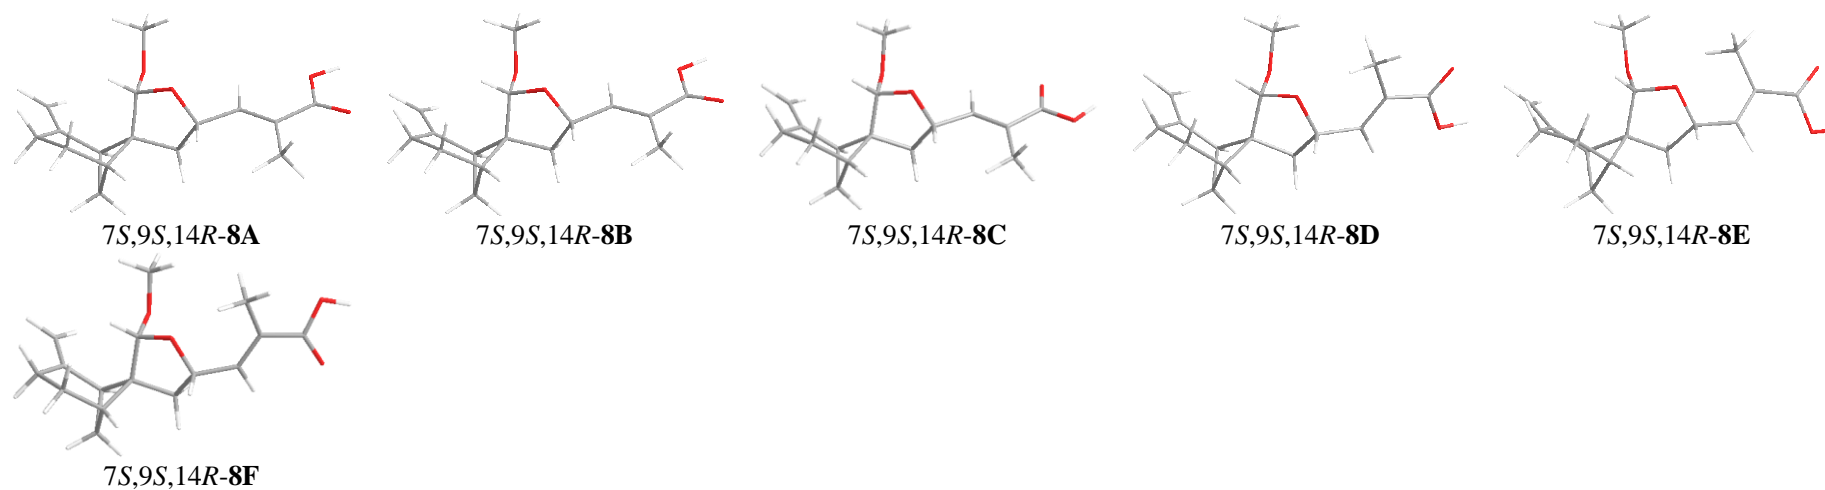

**Table S8.** Energy analysis for conformers of 6*S*,9*S*,14*S*-**7A**–6*S*,9*S*,14*S*-**7E** at B3LYP/6-31G(d) level in the gas phase

| Species                                         | $E'=E+ZPE$  | $E$         | $H$         | $G$         | $\Delta G$ | $\Delta E(\text{kcal/mol})$ | $PE\%$ |
|-------------------------------------------------|-------------|-------------|-------------|-------------|------------|-----------------------------|--------|
| 7 <i>S</i> ,9 <i>S</i> ,14 <i>S</i> - <b>7A</b> | -923.430034 | -923.410552 | -923.409608 | -923.479402 | 0          | 0                           | 46.18% |
| 7 <i>S</i> ,9 <i>S</i> ,14 <i>S</i> - <b>7B</b> | -923.430071 | -923.410679 | -923.409735 | -923.479299 | 0.000103   | 0.064633                    | 41.41% |
| 7 <i>S</i> ,9 <i>S</i> ,14 <i>S</i> - <b>7C</b> | -923.427379 | -923.407883 | -923.406939 | -923.477329 | 0.002073   | 1.300827                    | 5.13%  |
| 7 <i>S</i> ,9 <i>S</i> ,14 <i>S</i> - <b>7D</b> | -923.427568 | -923.408186 | -923.407242 | -923.477005 | 0.002397   | 1.504140                    | 3.64%  |
| 7 <i>S</i> ,9 <i>S</i> ,14 <i>S</i> - <b>7E</b> | -923.427568 | -923.408186 | -923.407242 | -923.477005 | 0.002397   | 1.504140                    | 3.64%  |

**Figure S8.** Main conformers of 7*S*,9*S*,14*S*-**7** in NMR and ECD calculations.

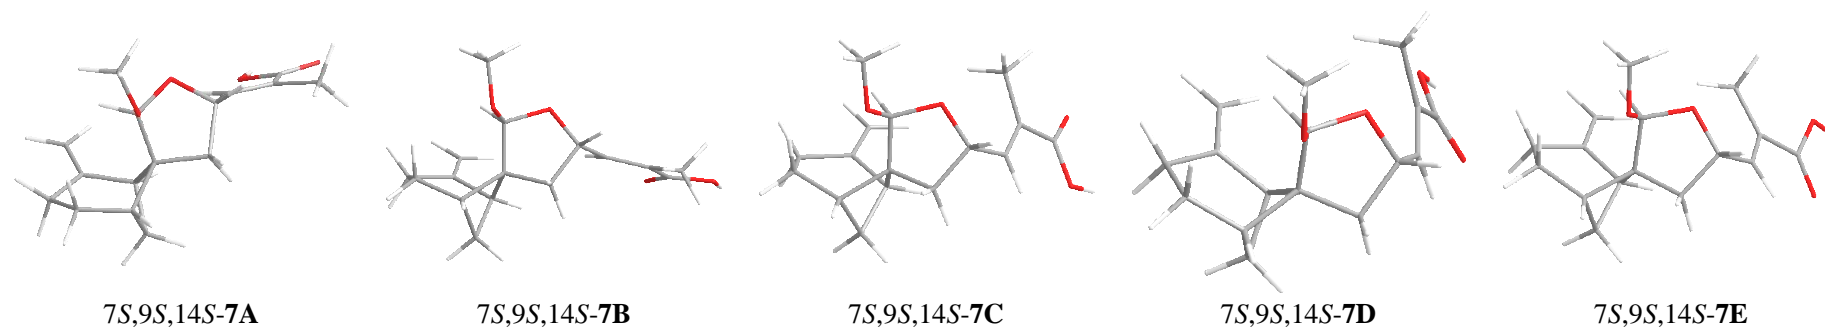

**Table S9.** DP4+ analysis results of 7S,9S,14R-8 (Isomer 1) and 7S,9S,14S-7 (Isomer 2) with 7S,9S,14R-8

|    | A                | B    | C           | D        | E            | F        | G                 | H        |
|----|------------------|------|-------------|----------|--------------|----------|-------------------|----------|
| 1  | Functional       |      | Solvent?    |          | Basis Set    |          | Type of Data      |          |
| 2  | mPW1PW91         |      | PCM         |          | 6-311+G(d,p) |          | Shielding Tensors |          |
| 3  |                  |      |             |          |              |          |                   |          |
| 12 |                  |      | DP4+        | 86.91%   | 13.09%       | –        | –                 | –        |
| 14 | Nuclei           | sp2? | xperimental | Isomer 1 | Isomer 2     | Isomer 3 | Isomer 4          | Isomer 5 |
| 15 | C                |      | 49.1        | 134.7    | 132.2        |          |                   |          |
| 16 | C                | x    | 151         | 24.8     | 24.2         |          |                   |          |
| 17 | C                |      | 24.3        | 159.9    | 159.5        |          |                   |          |
| 18 | C                |      | 24.7        | 160.6    | 160.3        |          |                   |          |
| 19 | C                |      | 40.6        | 144.3    | 144.2        |          |                   |          |
| 20 | C                |      | 56.5        | 126.7    | 127.2        |          |                   |          |
| 21 | C                |      | 29.1        | 159.6    | 160.2        |          |                   |          |
| 22 | C                |      | 39.4        | 146.4    | 144.3        |          |                   |          |
| 23 | C                |      | 75.7        | 108.9    | 108.9        |          |                   |          |
| 24 | C                | x    | 144.2       | 30.0     | 30.4         |          |                   |          |
| 25 | C                | x    | 130.2       | 55.0     | 55.1         |          |                   |          |
| 26 | C                | x    | 171.3       | 11.7     | 11.5         |          |                   |          |
| 27 | C                |      | 12.8        | 173.3    | 172.9        |          |                   |          |
| 28 | C                |      | 106.8       | 78.8     | 77.3         |          |                   |          |
| 29 | C                | x    | 107.8       | 75.1     | 74.8         |          |                   |          |
| 30 | C                |      | 55.4        | 132.3    | 132.6        |          |                   |          |
|    | A                | B    | C           | D        | E            | F        | G                 | H        |
| 1  | Functional       |      | Solvent?    |          | Basis Set    |          | Type of Data      |          |
| 2  | mPW1PW91         |      | PCM         |          | 6-311+G(d,p) |          | Shielding Tensors |          |
| 3  |                  |      |             |          |              |          |                   |          |
| 4  |                  |      | Isomer 1    | Isomer 2 | Isomer 3     | Isomer 4 | Isomer 5          | Isomer 6 |
| 5  | sDP4+ (H data)   |      | –           | –        | –            | –        | –                 | –        |
| 6  | sDP4+ (C data)   |      | 89.98%      | 10.02%   | –            | –        | –                 | –        |
| 7  | sDP4+ (all data) |      | 89.98%      | 10.02%   | –            | –        | –                 | –        |
| 8  | uDP4+ (H data)   |      | –           | –        | –            | –        | –                 | –        |
| 9  | uDP4+ (C data)   |      | 42.51%      | 57.49%   | –            | –        | –                 | –        |
| 10 | uDP4+ (all data) |      | 42.51%      | 57.49%   | –            | –        | –                 | –        |
| 11 | DP4+ (H data)    |      | –           | –        | –            | –        | –                 | –        |
| 12 | DP4+ (C data)    |      | 86.91%      | 13.09%   | –            | –        | –                 | –        |
| 13 | DP4+ (all data)  |      | 86.91%      | 13.09%   | –            | –        | –                 | –        |

**Table S10.** DP4+ analysis results of 7S,9S,14R-8 (Isomer 1) and 7S,9S,14S-7 (Isomer 2) with 7S,9S,14S-7

|    | A                | B    | C          | D        | E            | F        | G                 | H        |
|----|------------------|------|------------|----------|--------------|----------|-------------------|----------|
| 1  | Functional       |      | Solvent?   |          | Basis Set    |          | Type of Data      |          |
| 2  | mPW1PW91         |      | PCM        |          | 6-311+G(d,p) |          | Shielding Tensors |          |
| 3  |                  |      |            |          |              |          |                   |          |
| 12 |                  |      | DP4+       | 0.11%    | 99.89%       | –        | –                 | –        |
| 14 | Nuclei           | sp2? | xperimenta | Isoner 1 | Isoner 2     | Isoner 3 | Isoner 4          | Isoner 5 |
| 15 | C                |      | 52         | 134.7    | 132.2        |          |                   |          |
| 16 | C                | x    | 150        | 24.8     | 24.2         |          |                   |          |
| 17 | C                |      | 23.1       | 159.9    | 159.5        |          |                   |          |
| 18 | C                |      | 23.5       | 160.6    | 160.3        |          |                   |          |
| 19 | C                |      | 39.4       | 144.3    | 144.2        |          |                   |          |
| 20 | C                |      | 54.7       | 126.7    | 127.2        |          |                   |          |
| 21 | C                |      | 26.5       | 159.6    | 160.2        |          |                   |          |
| 22 | C                |      | 40.4       | 146.4    | 144.3        |          |                   |          |
| 23 | C                |      | 73.7       | 108.9    | 108.9        |          |                   |          |
| 24 | C                | x    | 143        | 30.0     | 30.4         |          |                   |          |
| 25 | C                | x    | 128.1      | 55.0     | 55.1         |          |                   |          |
| 26 | C                | x    | 169.8      | 11.7     | 11.5         |          |                   |          |
| 27 | C                |      | 11.4       | 173.3    | 172.9        |          |                   |          |
| 28 | C                |      | 106.4      | 78.8     | 77.3         |          |                   |          |
| 29 | C                | x    | 107        | 75.1     | 74.8         |          |                   |          |
| 30 | C                |      | 53.3       | 132.3    | 132.6        |          |                   |          |
|    | A                | B    | C          | D        | E            | F        | G                 | H        |
| 1  | Functional       |      | Solvent?   |          | Basis Set    |          | Type of Data      |          |
| 2  | mPW1PW91         |      | PCM        |          | 6-311+G(d,p) |          | Shielding Tensors |          |
| 3  |                  |      |            |          |              |          |                   |          |
| 4  |                  |      | Isomer 1   | Isomer 2 | Isomer 3     | Isomer 4 | Isomer 5          | Isomer 6 |
| 5  | sDP4+ (H data)   |      | –          | –        | –            | –        | –                 | –        |
| 6  | sDP4+ (C data)   |      | 2.83%      | 97.17%   | –            | –        | –                 | –        |
| 7  | sDP4+ (all data) |      | 2.83%      | 97.17%   | –            | –        | –                 | –        |
| 8  | uDP4+ (H data)   |      | –          | –        | –            | –        | –                 | –        |
| 9  | uDP4+ (C data)   |      | 3.72%      | 96.28%   | –            | –        | –                 | –        |
| 10 | uDP4+ (all data) |      | 3.72%      | 96.28%   | –            | –        | –                 | –        |
| 11 | DP4+ (H data)    |      | –          | –        | –            | –        | –                 | –        |
| 12 | DP4+ (C data)    |      | 0.11%      | 99.89%   | –            | –        | –                 | –        |
| 13 | DP4+ (all data)  |      | 0.11%      | 99.89%   | –            | –        | –                 | –        |

### S3.2. Computational details for 7*S*,9*S*,14*R*-8 and 7*S*,9*S*,14*S*-7 (ECD)

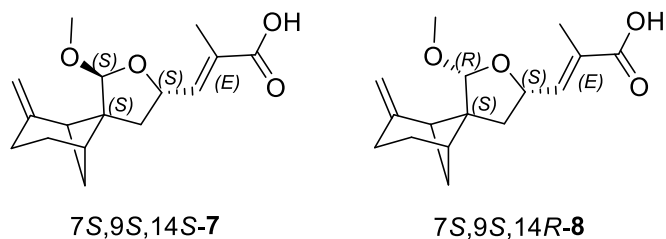

Conformation search based on molecular mechanics with MMFF force fields were performed for 7*S*,9*S*,14*S*-7 and 7*S*,9*S*,14*R*-8 gave 5 and 6 stable conformers with populations higher than 1%, respectively. All these conformers were further optimized by the density functional theory method at the B3LYP/6-31G(d) level by Gaussian 16 program package. The ECD were calculated using density functional theory (TDDFT) at B3LYP/6-31+G(d) level in methanol with IEFPCM model. The calculated ECD curves were all generated using SpecDis 1.71 with  $\sigma = 0.30$  eV, UV shift -20 and -10 nm, respectively.

**Figure S9.** Comparison of the calculated ECD spectra for possible structure with the experimental spectrum of 7*S*,9*S*,14*S*-7 and 7*S*,9*S*,14*R*-8 in methanol.

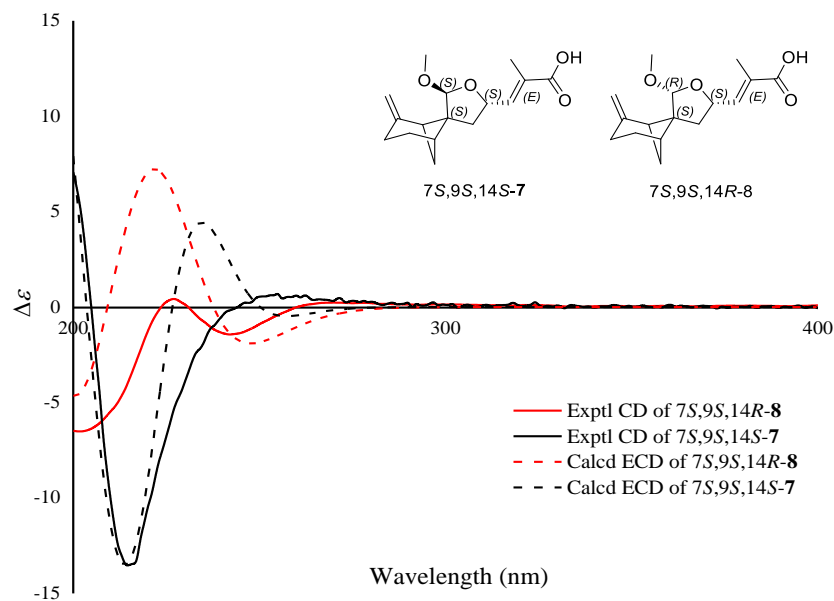



## Section S4. Computational details for **10**

### S4.1. Computational details for **10** (ECD)

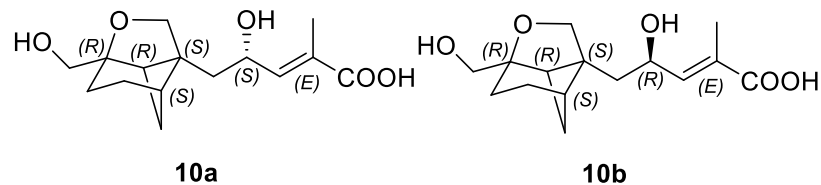

Conformation search based on molecular mechanics with MMFF force fields were performed for **10a** and **10b** gave 9 and 12 stable conformers with populations higher than 1%, respectively. All these conformers were further optimized by the density functional theory method at the B3LYP/6-31G(d) level by Gaussian 16 program package. The ECD were calculated using density functional theory (TDDFT) at B3LYP/6-31+G(d) level in methanol with IEFPCM model. The calculated ECD curves were all generated using SpecDis 1.71 with  $\sigma = 0.30$  eV, UV shift -18 and -18 nm, respectively.

**Figure S10.** Comparison of the calculated ECD spectra for possible structure with the experimental spectrum of **10** in methanol with PCM model.

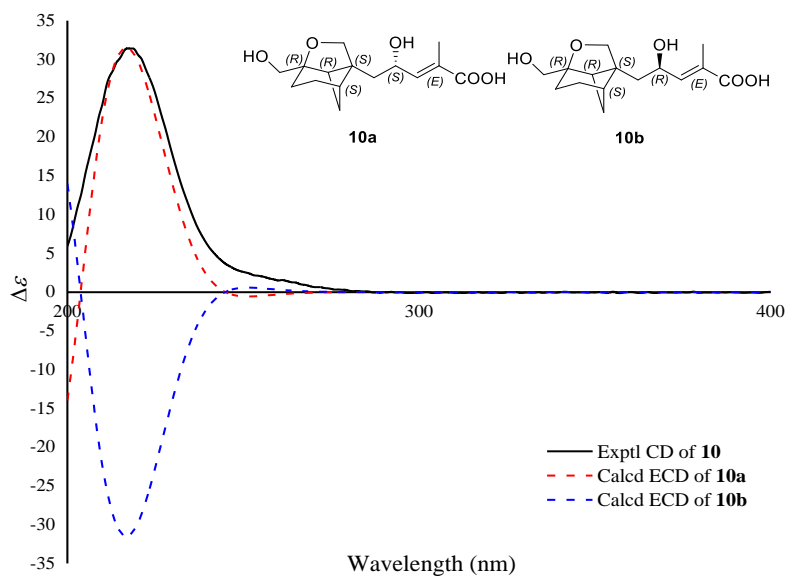

**Table S11.** Energy analysis for conformers of **10aA–10aI** at B3LYP/6-31G(d) level in the gas phase

| Species     | $E'=E+ZPE$  | $E$         | $H$         | $G$         | $\Delta G$ | $\Delta E(\text{kcal/mol})$ | $PE\%$ |
|-------------|-------------|-------------|-------------|-------------|------------|-----------------------------|--------|
| <b>10aA</b> | -960.558406 | -960.538984 | -960.538040 | -960.607670 | 0          | 0                           | 38.64% |
| <b>10aB</b> | -960.558367 | -960.539069 | -960.538125 | -960.607301 | 0.000369   | 0.231551                    | 26.14% |
| <b>10aC</b> | -960.556762 | -960.537217 | -960.536273 | -960.606432 | 0.001238   | 0.776857                    | 10.41% |
| <b>10aD</b> | -960.557455 | -960.538090 | -960.537146 | -960.606438 | 0.001232   | 0.773092                    | 10.47% |
| <b>10aE</b> | -960.556308 | -960.537096 | -960.536152 | -960.604867 | 0.002803   | 1.758909                    | 1.98%  |
| <b>10aF</b> | -960.556735 | -960.537309 | -960.536365 | -960.605920 | 0.001750   | 1.098142                    | 6.05%  |
| <b>10aG</b> | -960.556376 | -960.537295 | -960.536351 | -960.604531 | 0.003139   | 1.969752                    | 1.39%  |
| <b>10aH</b> | -960.555902 | -960.536542 | -960.535598 | -960.604874 | 0.002796   | 1.754517                    | 2.00%  |
| <b>10aI</b> | -960.556216 | -960.536805 | -960.535860 | -960.605236 | 0.002434   | 1.527358                    | 2.93%  |

$E$ ,  $E'$ ,  $H$ ,  $G$ : total energy, total energy with zero point energy (ZPE), enthalpy, and Gibbs free energy

**Figure S11.** Main conformers of **10a** in ECD calculation.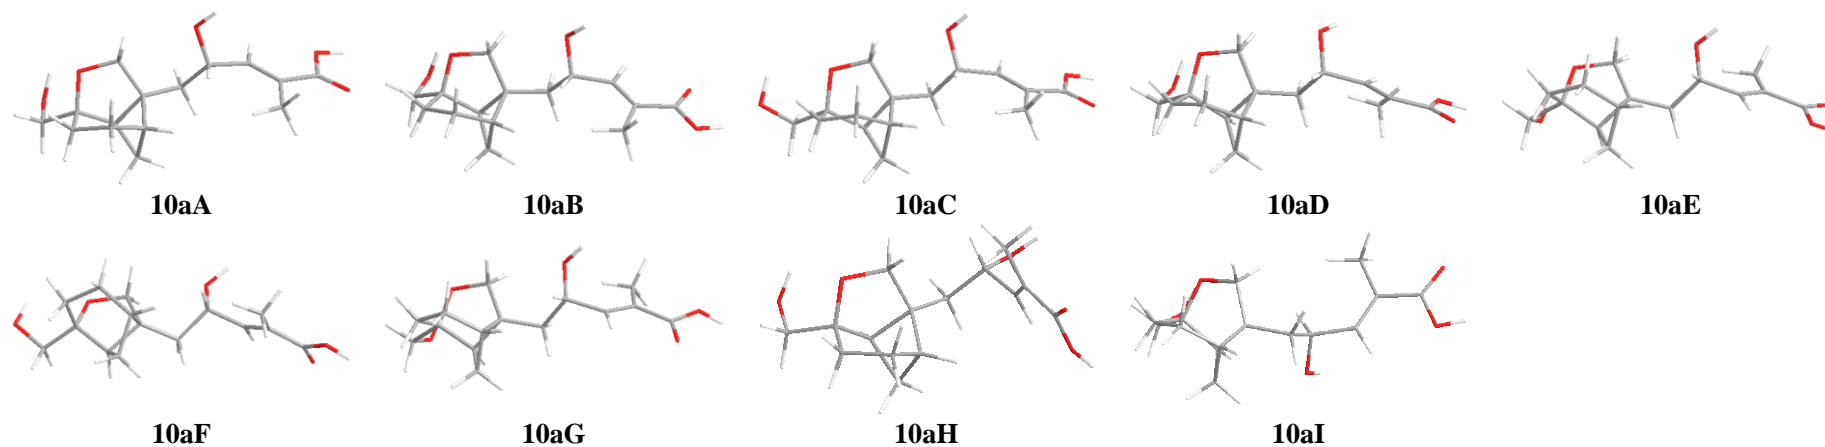**Table S12.** Energy analysis for conformers of **10bA–10bL** at B3LYP/6-31G(d) level in the gas phase

| Species     | $E'=E+ZPE$  | $E$         | $H$         | $G$         | $\Delta G$ | $\Delta E(\text{kcal/mol})$ | $PE\%$ |
|-------------|-------------|-------------|-------------|-------------|------------|-----------------------------|--------|
| <b>10bA</b> | -960.557174 | -960.537738 | -960.536794 | -960.606304 | 0          | 0                           | 29.81% |
| <b>10bB</b> | -960.555406 | -960.536074 | -960.535130 | -960.604205 | 0.002099   | 1.317142                    | 3.22%  |
| <b>10bC</b> | -960.557188 | -960.537843 | -960.536899 | -960.606157 | 0.000147   | 0.092244                    | 25.51% |
| <b>10bD</b> | -960.556102 | -960.536710 | -960.535766 | -960.605386 | 0.000918   | 0.576054                    | 11.27% |
| <b>10bE</b> | -960.555361 | -960.536147 | -960.535203 | -960.603769 | 0.002535   | 1.590737                    | 2.03%  |

|             |             |             |             |             |          |          |        |
|-------------|-------------|-------------|-------------|-------------|----------|----------|--------|
| <b>10bF</b> | -960.555494 | -960.535950 | -960.535006 | -960.604963 | 0.001341 | 0.841490 | 7.20%  |
| <b>10bG</b> | -960.556164 | -960.536849 | -960.535905 | -960.605279 | 0.001025 | 0.643197 | 10.06% |
| <b>10bH</b> | -960.555043 | -960.535766 | -960.534822 | -960.604090 | 0.002214 | 1.389306 | 2.85%  |
| <b>10bI</b> | -960.553717 | -960.534287 | -960.533343 | -960.602677 | 0.003627 | 2.275977 | 0.64%  |
| <b>10bJ</b> | -960.556008 | -960.536753 | -960.535809 | -960.604568 | 0.001736 | 1.089356 | 4.73%  |
| <b>10bK</b> | -960.554282 | -960.534900 | -960.533956 | -960.602934 | 0.003370 | 2.114707 | 0.84%  |
| <b>10bL</b> | -960.555095 | -960.535952 | -960.535008 | -960.603677 | 0.002627 | 1.648467 | 1.84%  |

*E*, *E'*, *H*, *G*: total energy, total energy with zero point energy (*ZPE*), enthalpy, and Gibbs free energy

**Figure S12.** Main conformers of **10b** in ECD calculation.

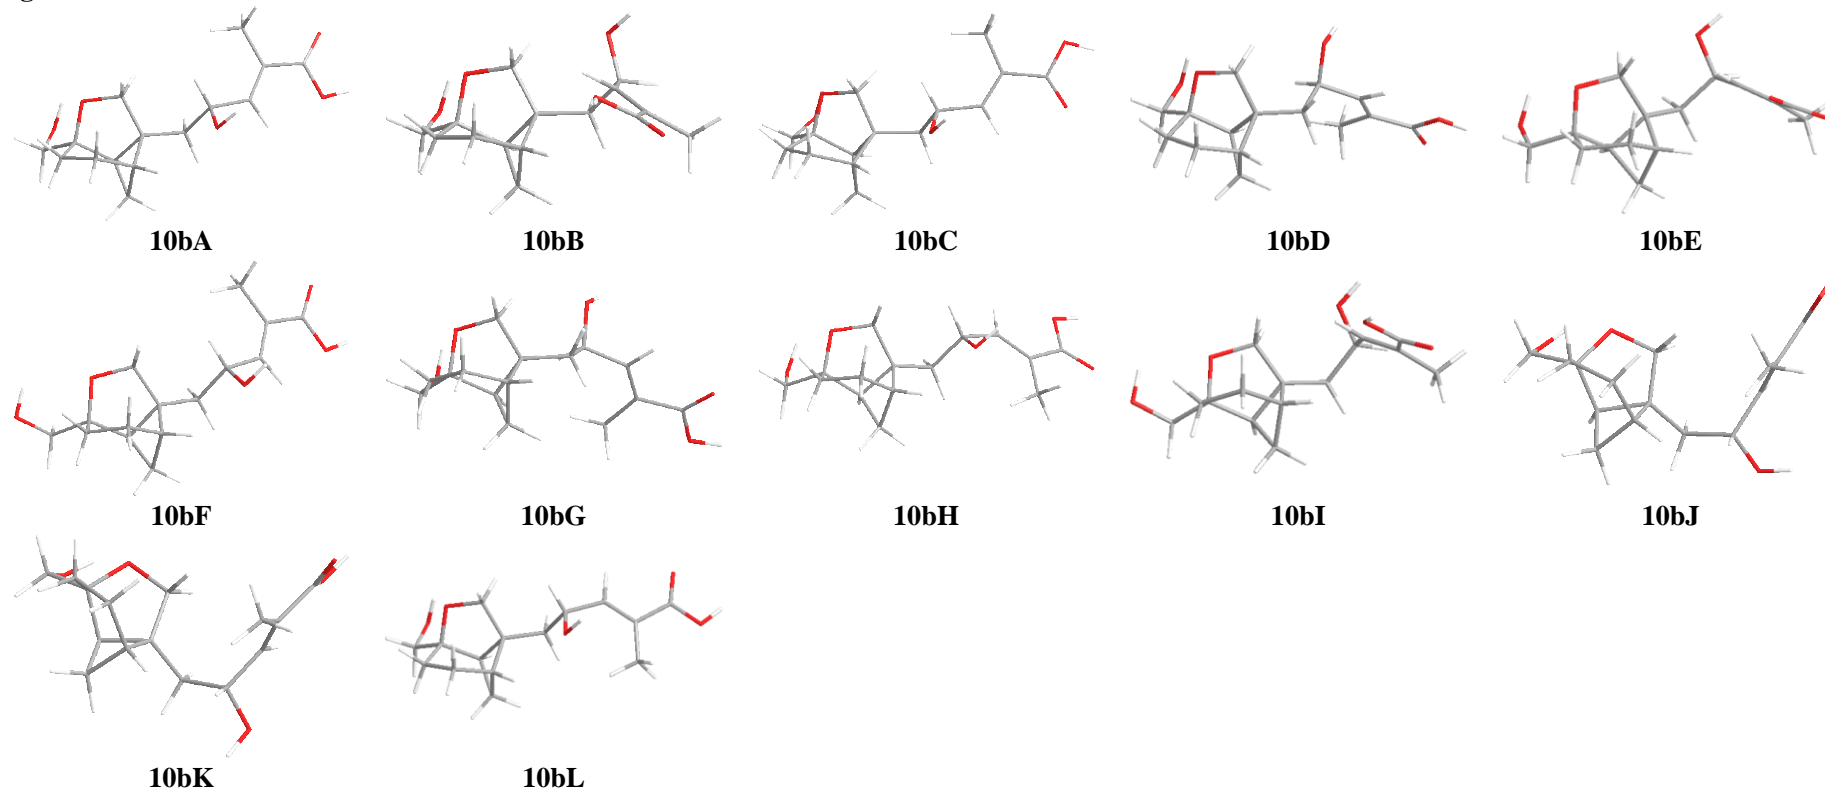

## Section S5. Computational details for 11

### S5.1. Computational details for 11 (NMR)

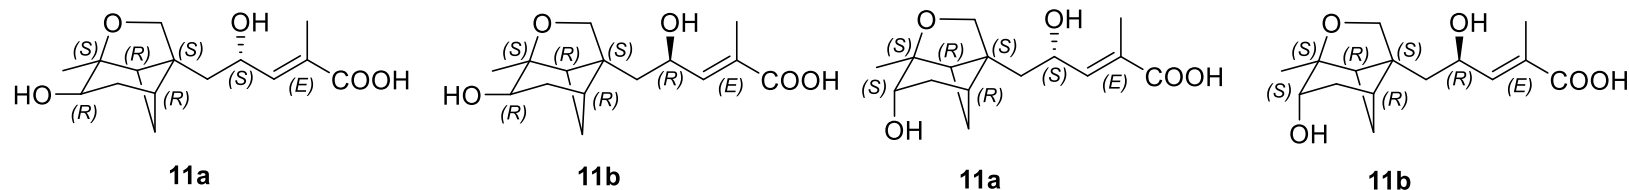

Conformation search based on molecular mechanics with MMFF force fields were performed for **11a**, **11b**, **11c** and **11d** gave 8, 14, 3 and 4 stable conformers with populations higher than 1%, respectively. All these conformers were further optimized by the density functional theory method at the B3LYP/6-31G(d) level by Gaussian 16 program package. Gauge Independent Atomic Orbital (GIAO) calculations of their  $^1\text{H}$  and  $^{13}\text{C}$  NMR chemical shifts using density functional theory (DFT) at the mPW1PW91/6-311+G(d,p) level with the PCM model in methanol. The calculated NMR data of these conformers were averaged according to the Boltzmann distribution theory and their relative Gibbs free energy. The  $^1\text{H}$  and  $^{13}\text{C}$  NMR chemical shifts for TMS were also calculated by the same procedures and used as the reference. After calculation, the experimental and calculated data were evaluated by the improved probability DP4+ method.

**Table S13.** Energy analysis for conformers of **11aA–11aH** at B3LYP/6-31G(d) level in the gas phase

| Species     | $E'=E+ZPE$  | $E$         | $H$         | $G$         | $\Delta G$ | $\Delta E(\text{kcal/mol})$ | $PE\%$ |
|-------------|-------------|-------------|-------------|-------------|------------|-----------------------------|--------|
| <b>11aA</b> | -960.564000 | -960.544556 | -960.543611 | -960.612659 | 0          | 0                           | 33.74% |
| <b>11aB</b> | -960.564017 | -960.544659 | -960.543714 | -960.612494 | 0.000165   | 0.103539                    | 28.33% |
| <b>11aC</b> | -960.561967 | -960.542677 | -960.541733 | -960.610252 | 0.002407   | 1.510415                    | 2.63%  |
| <b>11aD</b> | -960.563096 | -960.543659 | -960.542715 | -960.611756 | 0.000903   | 0.566641                    | 12.96% |
| <b>11aE</b> | -960.562085 | -960.542885 | -960.541941 | -960.610227 | 0.002432   | 1.526103                    | 2.56%  |
| <b>11aF</b> | -960.563234 | -960.543882 | -960.542938 | -960.611794 | 0.000865   | 0.542796                    | 13.49% |
| <b>11aG</b> | -960.561573 | -960.542129 | -960.541185 | -960.610009 | 0.002650   | 1.662900                    | 2.03%  |
| <b>11aH</b> | -960.561958 | -960.542440 | -960.541496 | -960.610703 | 0.001956   | 1.227409                    | 4.25%  |

$E$ ,  $E'$ ,  $H$ ,  $G$ : total energy, total energy with zero point energy ( $ZPE$ ), enthalpy, and Gibbs free energy

**Figure S13.** Main conformers of **11a** in NMR calculation.

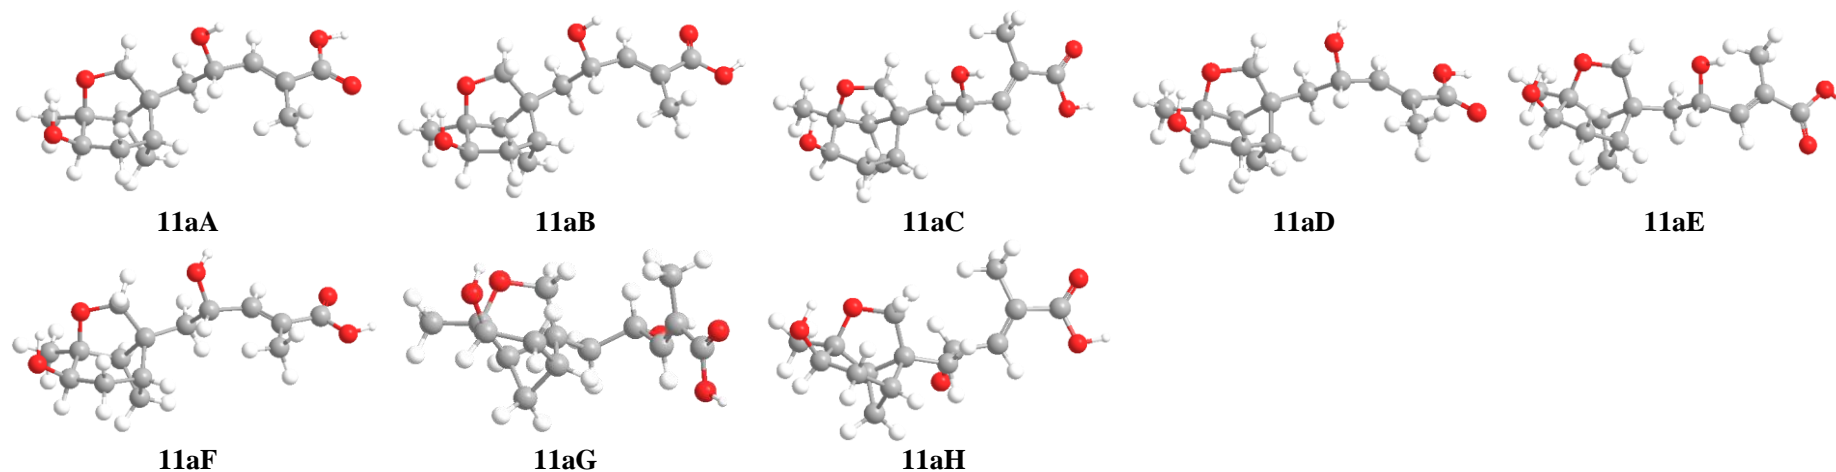

**Table S14.** Energy analysis for conformers of **11bA–11bN** at B3LYP/6-31G(d) level in the gas phase

| Species     | $E'=E+ZPE$  | $E$         | $H$         | $G$         | $\Delta G$ | $\Delta E(\text{kcal/mol})$ | $PE\%$ |
|-------------|-------------|-------------|-------------|-------------|------------|-----------------------------|--------|
| <b>11bA</b> | -960.562876 | -960.543336 | -960.542392 | -960.611789 | 0.000304   | 0.190763                    | 22.95% |
| <b>11bB</b> | -960.561084 | -960.541698 | -960.540754 | -960.609465 | 0.002628   | 1.649095                    | 1.96%  |
| <b>11bC</b> | -960.562955 | -960.543476 | -960.542532 | -960.612093 | 0          | 0                           | 31.68% |
| <b>11bD</b> | -960.561578 | -960.542164 | -960.541220 | -960.609996 | 0.002097   | 1.315887                    | 3.43%  |
| <b>11bE</b> | -960.561044 | -960.541770 | -960.540825 | -960.609041 | 0.003052   | 1.915159                    | 1.25%  |
| <b>11bF</b> | -960.561830 | -960.542299 | -960.541354 | -960.611060 | 0.001033   | 0.648217                    | 10.60% |
| <b>11bG</b> | -960.560382 | -960.540978 | -960.540034 | -960.608983 | 0.003110   | 1.951555                    | 1.17%  |
| <b>11bH</b> | -960.560787 | -960.541426 | -960.540482 | -960.609337 | 0.002756   | 1.729416                    | 1.71%  |
| <b>11bI</b> | -960.561946 | -960.542458 | -960.541514 | -960.610675 | 0.001418   | 0.889808                    | 7.05%  |
| <b>11bJ</b> | -960.561607 | -960.542290 | -960.541345 | -960.609776 | 0.002317   | 1.453940                    | 2.72%  |
| <b>11bK</b> | -960.562044 | -960.542663 | -960.541719 | -960.610520 | 0.001573   | 0.987072                    | 5.98%  |
| <b>11bL</b> | -960.560888 | -960.541631 | -960.540687 | -960.609218 | 0.002875   | 1.804090                    | 1.50%  |
| <b>11bM</b> | -960.561806 | -960.542394 | -960.541450 | -960.610718 | 0.001375   | 0.862826                    | 7.38%  |
| <b>11bN</b> | -960.559956 | -960.540460 | -960.539516 | -960.608382 | 0.003711   | 2.328688                    | 0.62%  |

$E$ ,  $E'$ ,  $H$ ,  $G$ : total energy, total energy with zero point energy ( $ZPE$ ), enthalpy, and Gibbs free energy

**Figure S14.** Main conformers of **11b** in NMR calculation.

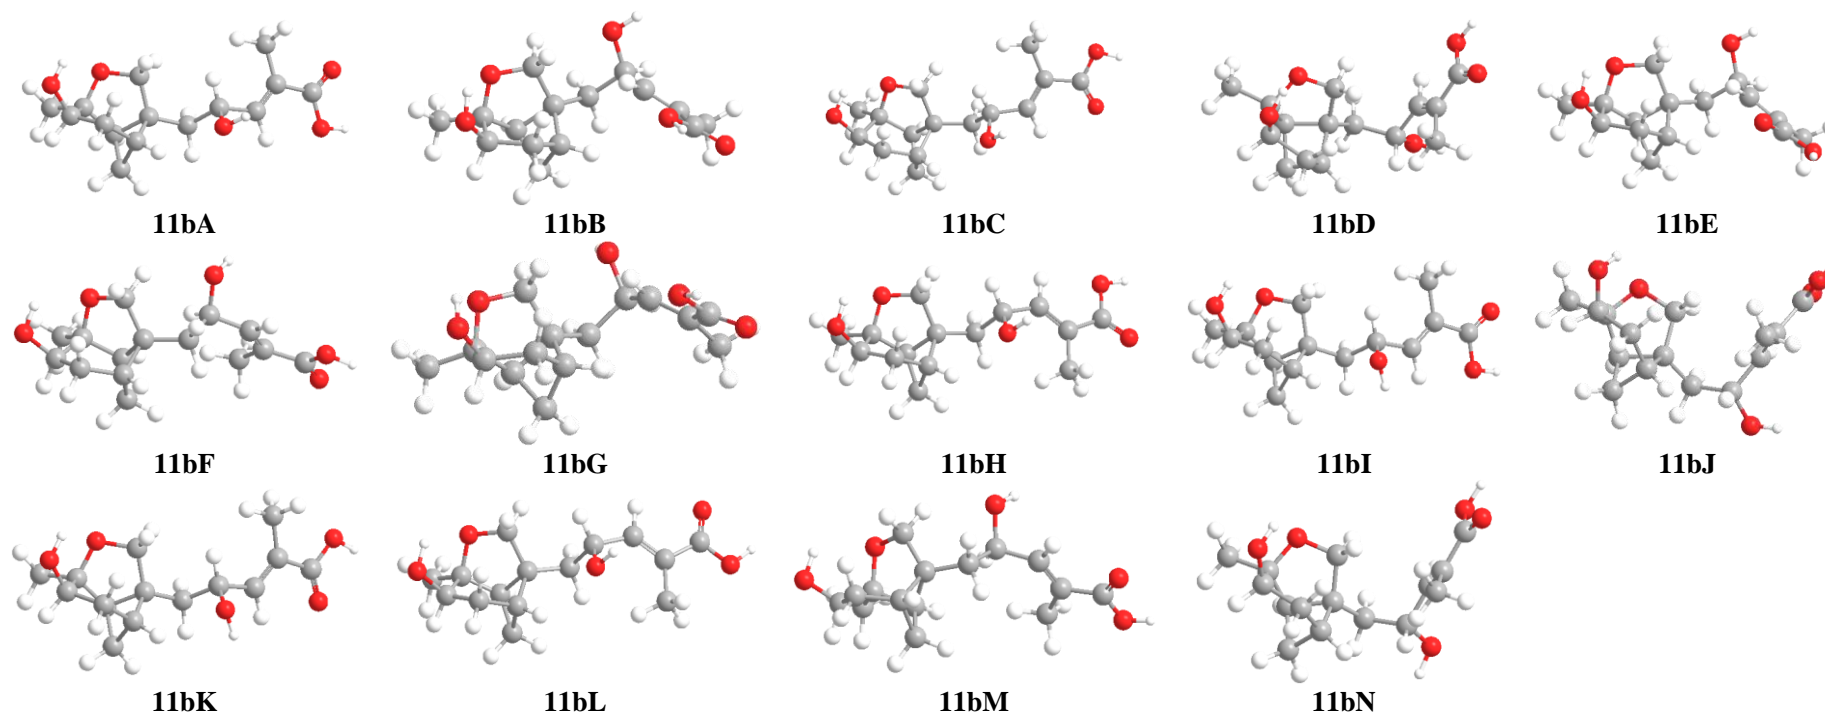

**Table S15.** Energy analysis for conformers of **11cA–11cC** at B3LYP/6-31G(d) level in the gas phase

| Species     | $E'=E+ZPE$  | $E$         | $H$         | $G$         | $\Delta G$ | $\Delta E(\text{kcal/mol})$ | $PE\%$ |
|-------------|-------------|-------------|-------------|-------------|------------|-----------------------------|--------|
| <b>11cA</b> | -960.559341 | -960.539753 | -960.538809 | -960.608210 | 0          | 0                           | 89.73% |
| <b>11cB</b> | -960.557064 | -960.537596 | -960.536652 | -960.605459 | 0.002751   | 1.726279                    | 4.86%  |
| <b>11cC</b> | -960.557322 | -960.537958 | -960.537014 | -960.605559 | 0.002651   | 1.663528                    | 5.40%  |

$E$ ,  $E'$ ,  $H$ ,  $G$ : total energy, total energy with zero point energy ( $ZPE$ ), enthalpy, and Gibbs free energy

**Figure S15.** Main conformers of **11c** in NMR and ECD calculations.

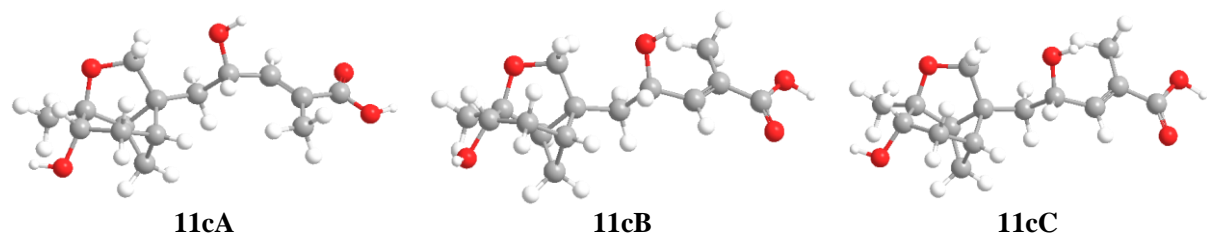

**Table S16.** Energy analysis for conformers of **11dA–11dD** at B3LYP/6-31G(d) level in the gas phase

| Species     | $E'=E+ZPE$  | $E$         | $H$         | $G$         | $\Delta G$ | $\Delta E(\text{kcal/mol})$ | $PE\%$ |
|-------------|-------------|-------------|-------------|-------------|------------|-----------------------------|--------|
| <b>11dA</b> | -960.558201 | -960.538472 | -960.537528 | -960.607671 | 0          | 0                           | 43.87% |
| <b>11dB</b> | -960.557972 | -960.538260 | -960.537316 | -960.607436 | 0.000235   | 0.147465                    | 34.20% |
| <b>11dC</b> | -960.555786 | -960.536186 | -960.535242 | -960.604696 | 0.002975   | 1.866841                    | 1.87%  |
| <b>11dD</b> | -960.557404 | -960.537690 | -960.536745 | -960.606932 | 0.000739   | 0.463730                    | 20.05% |

$E$ ,  $E'$ ,  $H$ ,  $G$ : total energy, total energy with zero point energy ( $ZPE$ ), enthalpy, and Gibbs free energy

**Figure S16.** Main conformers of **11d** in NMR calculation.

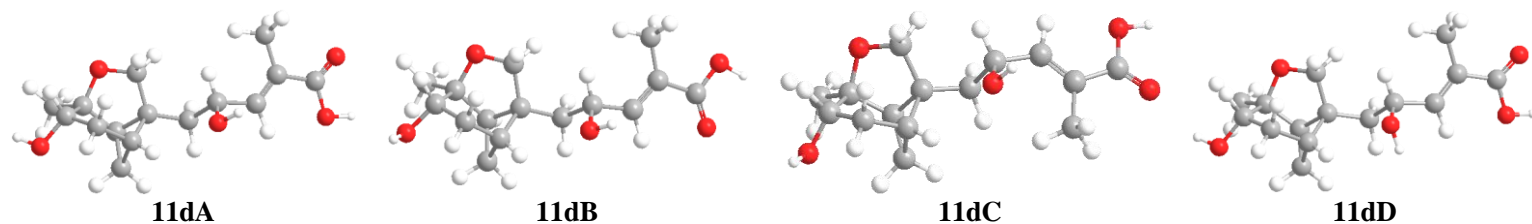

**Table S17.** DP4+ analysis results of **11a** (Isomer 1), **11b** (Isomer 2), **11c** (Isomer 3) and **11d** (Isomer 4) with **11**

|    | A          | B    | C           | D        | E            | F        | G                 | H        |
|----|------------|------|-------------|----------|--------------|----------|-------------------|----------|
| 1  | Functional |      | Solvent?    |          | Basis Set    |          | Type of Data      |          |
| 2  | mPVP91     |      | PCM         |          | 6-311+G(d,p) |          | Shielding Tensors |          |
| 3  |            |      |             |          |              |          |                   |          |
| 12 |            |      | DP4+        | 0.00%    | 0.00%        | 100.00%  | 0.00%             | –        |
| 14 | Nuclei     | sp2? | xperimental | Isomer 1 | Isomer 2     | Isomer 3 | Isomer 4          | Isomer 5 |
| 15 | C          |      | 87.4        | 95.4     | 93.9         | 96.6     | 94.6              |          |
| 16 | C          |      | 72.3        | 114.6    | 114.6        | 109.3    | 109.5             |          |
| 17 | C          |      | 32.9        | 149.9    | 150.3        | 151.9    | 151.4             |          |
| 18 | C          |      | 37.9        | 145.5    | 143.2        | 146.5    | 144.0             |          |
| 19 | C          |      | 22.8        | 163.2    | 163.7        | 162.9    | 163.5             |          |
| 20 | C          |      | 51.3        | 133.1    | 133.0        | 132.7    | 132.0             |          |
| 21 | C          |      | 54.7        | 128.4    | 128.6        | 127.8    | 128.1             |          |
| 22 | C          |      | 71.5        | 111.2    | 113.5        | 111.6    | 114.1             |          |
| 23 | C          |      | 21          | 165.5    | 165.4        | 165.7    | 165.1             |          |
| 24 | C          |      | 40.1        | 146.1    | 147.1        | 146.1    | 146.0             |          |
| 25 | C          |      | 65.8        | 116.5    | 114.9        | 116.9    | 114.1             |          |
| 26 | C          | x    | 141.8       | 30.7     | 30.6         | 29.6     | 30.5              |          |
| 27 | C          | x    | 129.3       | 54.6     | 54.5         | 54.5     | 54.7              |          |
| 28 | C          | x    | 172.2       | 11.6     | 11.6         | 11.5     | 11.6              |          |
| 29 | C          |      | 11.8        | 172.8    | 172.8        | 172.8    | 172.8             |          |
| 30 |            |      |             |          |              |          |                   |          |
| 31 | H          |      | 3.63        | 28.11    | 28.15        | 28.07    | 28.03             |          |
| 32 | H          |      | 2.25        | 29.36    | 29.43        | 29.43    | 29.40             |          |
| 33 | H          |      | 1.85        | 30.25    | 30.26        | 29.85    | 30.00             |          |
| 34 | H          |      | 2.27        | 29.45    | 29.32        | 29.45    | 29.14             |          |
| 35 | H          |      | 2.12        | 29.82    | 29.78        | 29.84    | 29.75             |          |
| 36 | H          |      | 2.06        | 30.32    | 30.38        | 29.61    | 29.61             |          |
| 37 | H          |      | 2.1         | 29.53    | 29.53        | 29.71    | 29.73             |          |
| 38 | H          |      | 3.85        | 28.07    | 27.90        | 28.08    | 28.13             |          |
| 39 | H          |      | 3.61        | 27.78    | 27.86        | 27.76    | 27.74             |          |
| 40 | H          |      | 1.31        | 30.03    | 30.01        | 30.53    | 30.52             |          |
| 41 | H          |      | 1.31        | 30.85    | 30.83        | 30.69    | 30.72             |          |
| 42 | H          |      | 1.31        | 30.61    | 30.61        | 30.23    | 30.17             |          |
| 43 | H          |      | 2           | 29.90    | 29.68        | 29.90    | 29.62             |          |
| 44 | H          |      | 1.81        | 30.00    | 30.22        | 30.00    | 30.35             |          |
| 45 | H          |      | 4.42        | 27.13    | 27.16        | 27.02    | 27.25             |          |
| 46 | H          | x    | 6.57        | 24.54    | 24.55        | 24.47    | 24.56             |          |
| 47 | H          |      | 1.83        | 30.03    | 29.87        | 29.65    | 29.92             |          |
| 48 | H          |      | 1.83        | 29.85    | 29.99        | 29.96    | 29.93             |          |
| 49 | H          |      | 1.83        | 29.82    | 29.90        | 29.84    | 30.04             |          |



|    | A                | B | C        | D        | E            | F        | G                 | H        |
|----|------------------|---|----------|----------|--------------|----------|-------------------|----------|
| 1  | Functional       |   | Solvent? |          | Basis Set    |          | Type of Data      |          |
| 2  | mPVP91           |   | PCM      |          | 6-311+G(d,p) |          | Shielding Tensors |          |
| 3  |                  |   |          |          |              |          |                   |          |
| 4  |                  |   | Isomer 1 | Isomer 2 | Isomer 3     | Isomer 4 | Isomer 5          | Isomer 6 |
| 5  | sDP4+ (H data)   |   | 0.16%    | 0.12%    | 98.00%       | 1.72%    | –                 | –        |
| 6  | sDP4+ (C data)   |   | 11.64%   | 0.05%    | 86.80%       | 1.51%    | –                 | –        |
| 7  | sDP4+ (all data) |   | 0.02%    | 0.00%    | 99.95%       | 0.03%    | –                 | –        |
| 8  | uDP4+ (H data)   |   | 0.33%    | 0.60%    | 75.68%       | 23.40%   | –                 | –        |
| 9  | uDP4+ (C data)   |   | 38.20%   | 0.41%    | 59.62%       | 1.77%    | –                 | –        |
| 10 | uDP4+ (all data) |   | 0.27%    | 0.01%    | 98.81%       | 0.91%    | –                 | –        |
| 11 | DP4+ (H data)    |   | 0.00%    | 0.00%    | 99.46%       | 0.54%    | –                 | –        |
| 12 | DP4+ (C data)    |   | 7.91%    | 0.00%    | 92.04%       | 0.05%    | –                 | –        |
| 13 | DP4+ (all data)  |   | 0.00%    | 0.00%    | 100.00%      | 0.00%    | –                 | –        |

### S5.2. Computational details for **11** (ECD)

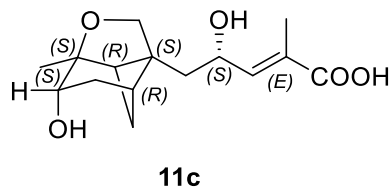

Conformation search based on molecular mechanics with MMFF force fields were performed for **11c** gave 3 stable conformers with populations higher than 1%. All these conformers were further optimized by the density functional theory method at the B3LYP/6-31G(d) level by Gaussian 16 program package. The ECD were calculated using density functional theory (TDDFT) at B3LYP/6-31+G(d) level in methanol with IEFPCM model. The calculated ECD curves were all generated using SpecDis 1.71.

**Figure S17.** Comparison of the calculated ECD spectra for possible structure with the experimental spectrum of **11** in methanol with PCM model.

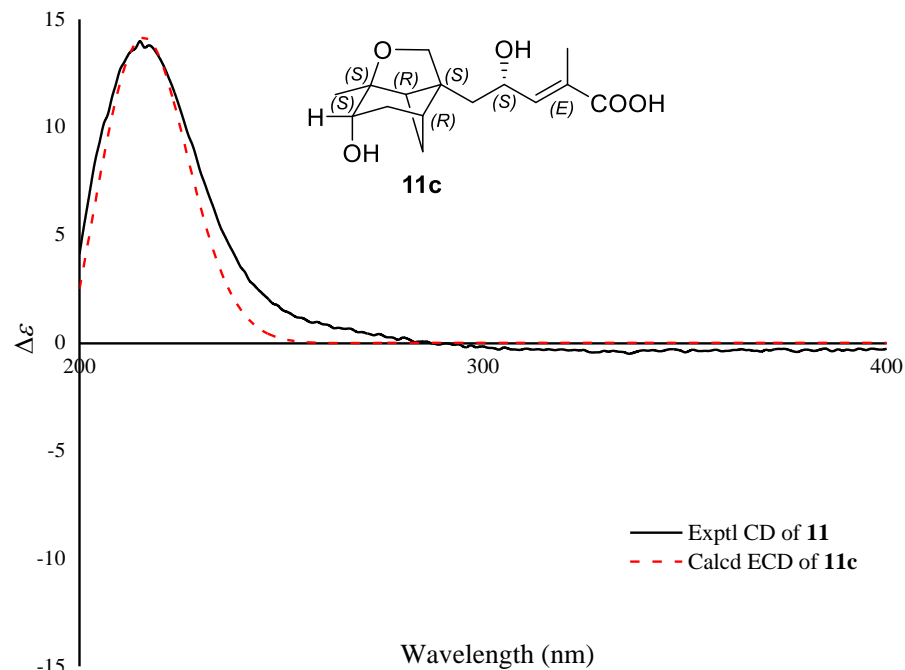

## Section S6. Computational details for **17**

### S6.1. Computational details for **17** (ECD)

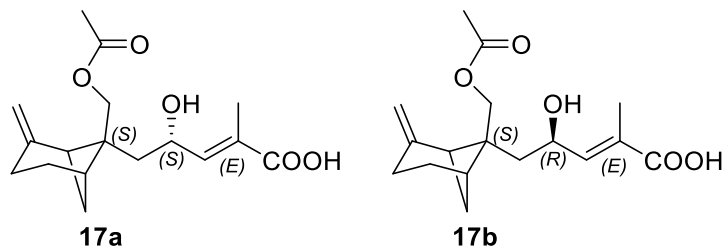

Conformation search based on molecular mechanics with MMFF force fields were performed for **17a** and **17b** gave 19 and 13 stable conformers with populations higher than 1%, respectively. All these conformers were further optimized by the density functional theory method at the B3LYP/6-31G(d) level by Gaussian 16 program package. The ECD were calculated using density functional theory (TDDFT) at B3LYP/6-31+G(d) level in methanol with IEFPCM model. The calculated ECD curves were all generated using SpecDis 1.71 with  $\sigma = 0.30$  eV, UV shift -30, and -27 nm, respectively.

**Figure S18.** Comparison of the calculated ECD spectra for possible structure with the experimental spectrum of **17** in methanol with PCM model.

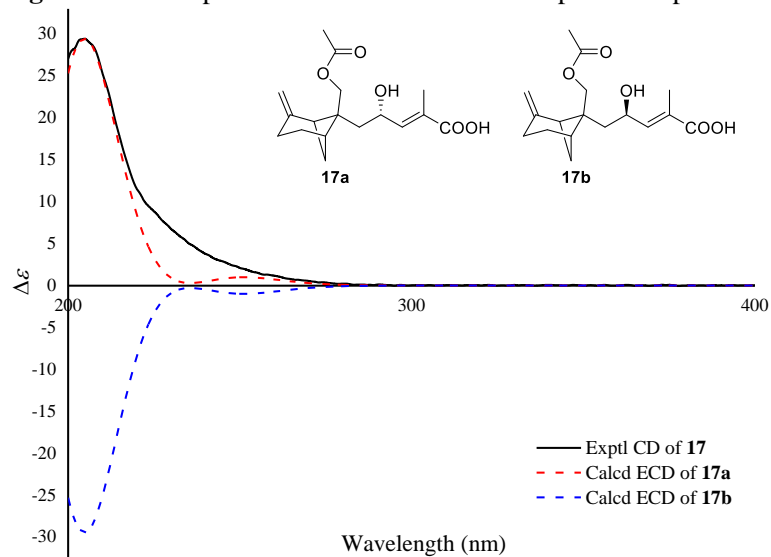

**Table S18.** Energy analysis for conformers of **17aA–17aS** at B3LYP/6-31G(d) level in the gas phase

| Species     | $E'=E+ZPE$   | $E$          | $H$          | $G$          | $\Delta G$ | $\Delta E(\text{kcal/mol})$ | $PE\%$ |
|-------------|--------------|--------------|--------------|--------------|------------|-----------------------------|--------|
| <b>17aA</b> | -1037.954922 | -1037.931906 | -1037.930962 | -1038.009872 | 0.000998   | 0.626254                    | 8.07%  |
| <b>17aB</b> | -1037.954900 | -1037.931995 | -1037.931051 | -1038.009603 | 0.001267   | 0.795055                    | 6.07%  |
| <b>17aC</b> | -1037.952727 | -1037.929956 | -1037.929012 | -1038.008229 | 0.002641   | 1.657253                    | 1.41%  |
| <b>17aD</b> | -1037.954573 | -1037.931695 | -1037.930751 | -1038.009911 | 0.000959   | 0.601782                    | 8.41%  |
| <b>17aE</b> | -1037.956899 | -1037.934403 | -1037.933459 | -1038.010870 | 0          | 0                           | 23.23% |
| <b>17aF</b> | -1037.952910 | -1037.929807 | -1037.928863 | -1038.007908 | 0.002962   | 1.858683                    | 1.01%  |
| <b>17aG</b> | -1037.952671 | -1037.930038 | -1037.929093 | -1038.007451 | 0.003419   | 2.145455                    | 0.62%  |
| <b>17aH</b> | -1037.954512 | -1037.931415 | -1037.930470 | -1038.010222 | 0.000648   | 0.406626                    | 11.69% |
| <b>17aI</b> | -1037.952702 | -1037.929941 | -1037.928997 | -1038.006025 | 0.004845   | 3.040284                    | 0.14%  |
| <b>17aJ</b> | -1037.956917 | -1037.934534 | -1037.933590 | -1038.010575 | 0.000295   | 0.185115                    | 16.99% |
| <b>17aK</b> | -1037.952971 | -1037.930055 | -1037.929111 | -1038.007230 | 0.003640   | 2.284135                    | 0.49%  |
| <b>17aL</b> | -1037.954477 | -1037.931736 | -1037.930792 | -1038.009324 | 0.001546   | 0.970130                    | 4.51%  |
| <b>17aM</b> | -1037.952423 | -1037.929553 | -1037.928609 | -1038.007503 | 0.003367   | 2.112824                    | 0.66%  |
| <b>17aN</b> | -1037.952905 | -1037.929889 | -1037.928945 | -1038.007778 | 0.003092   | 1.940259                    | 0.88%  |
| <b>17aO</b> | -1037.953996 | -1037.931149 | -1037.930205 | -1038.008502 | 0.002368   | 1.485942                    | 1.89%  |
| <b>17aP</b> | -1037.951652 | -1037.928838 | -1037.927894 | -1038.005231 | 0.005639   | 3.538526                    | 0.06%  |
| <b>17aQ</b> | -1037.954566 | -1037.931535 | -1037.930591 | -1038.010238 | 0.000632   | 0.396586                    | 11.89% |
| <b>17aR</b> | -1037.952907 | -1037.929841 | -1037.928897 | -1038.008204 | 0.002666   | 1.672940                    | 1.38%  |
| <b>17aS</b> | -1037.954282 | -1037.931902 | -1037.930958 | -1038.007455 | 0.003415   | 2.142945                    | 0.62%  |

$E$ ,  $E'$ ,  $H$ ,  $G$ : total energy, total energy with zero point energy ( $ZPE$ ), enthalpy, and Gibbs free energy

**Figure S19.** Main conformers of **17a** in NMR calculation.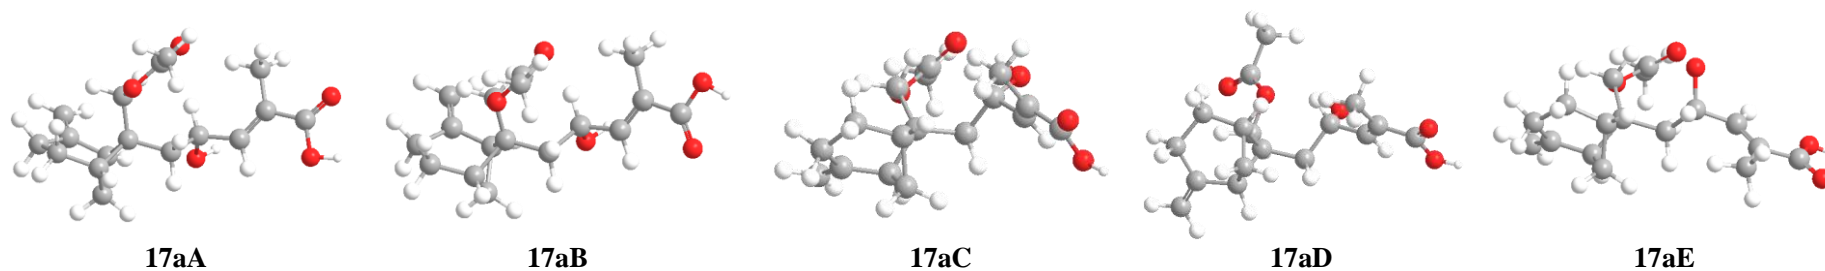

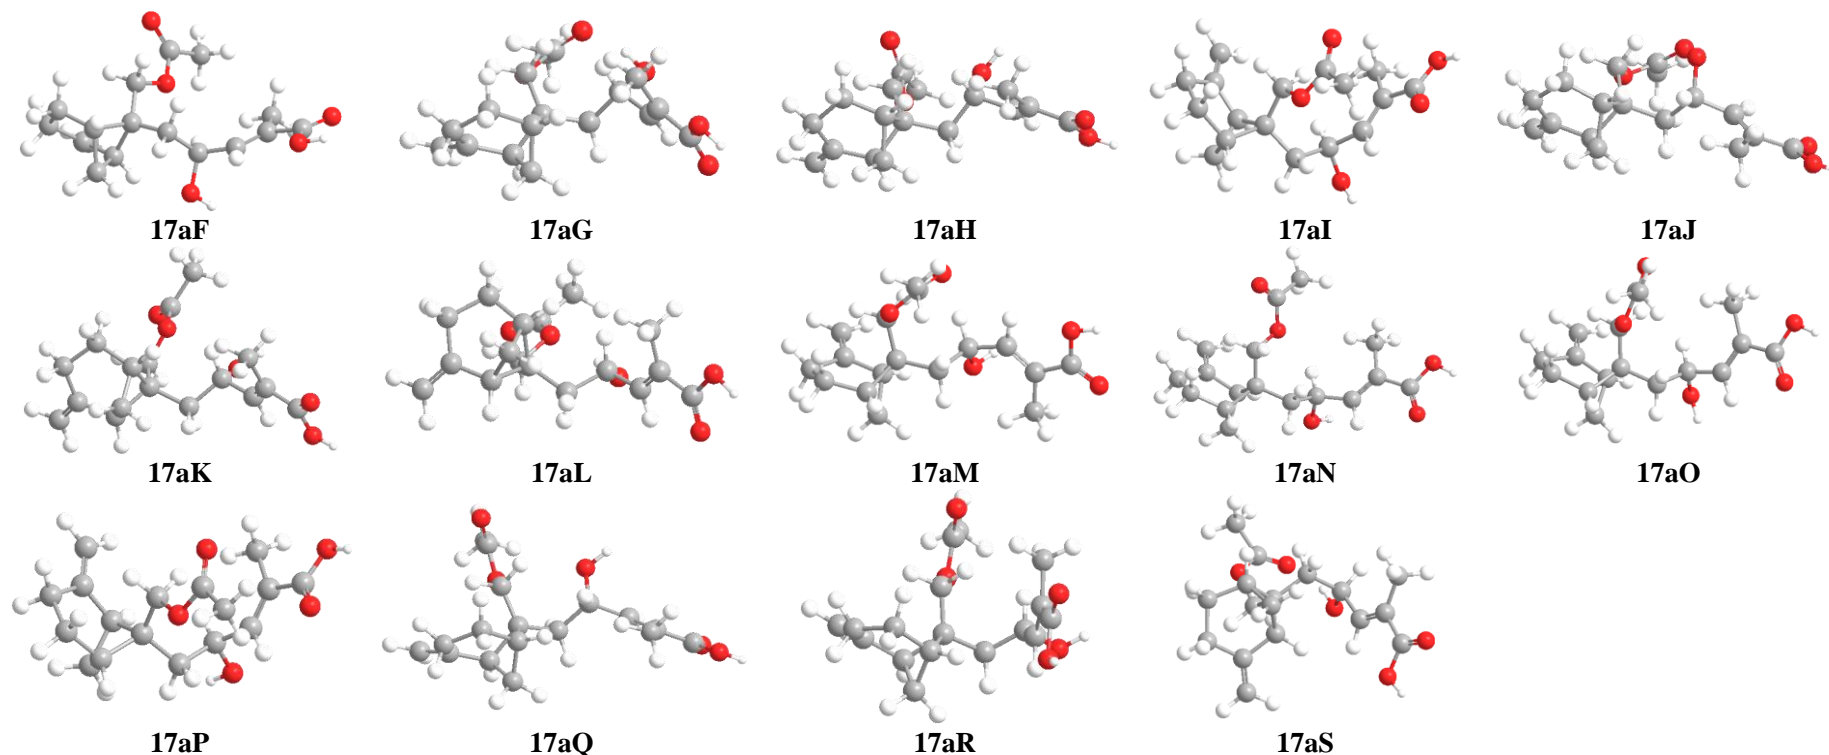

**Table S19.** Energy analysis for conformers of **17bA–17bM** at B3LYP/6-31G(d) level in the gas phase

| Species     | $E'=E+ZPE$   | $E$          | $H$          | $G$          | $\Delta G$ | $\Delta E(\text{kcal/mol})$ | $PE\%$ |
|-------------|--------------|--------------|--------------|--------------|------------|-----------------------------|--------|
| <b>17bA</b> | -1037.953692 | -1037.931004 | -1037.930060 | -1038.008273 | 0.003730   | 2.340610                    | 0.63%  |
| <b>17bB</b> | -1037.953707 | -1037.931091 | -1037.930147 | -1038.008255 | 0.003748   | 2.351906                    | 0.61%  |
| <b>17bC</b> | -1037.957696 | -1037.935163 | -1037.934219 | -1038.012003 | 0          | 0                           | 32.61% |
| <b>17bD</b> | -1037.957682 | -1037.935279 | -1037.934335 | -1038.011465 | 0.000538   | 0.337600                    | 18.44% |
| <b>17bE</b> | -1037.952088 | -1037.929485 | -1037.928541 | -1038.007015 | 0.004988   | 3.130017                    | 0.17%  |
| <b>17bF</b> | -1037.955135 | -1037.931994 | -1037.931050 | -1038.010634 | 0.001369   | 0.859061                    | 7.64%  |
| <b>17bG</b> | -1037.955134 | -1037.931994 | -1037.931049 | -1038.010630 | 0.001373   | 0.861571                    | 7.61%  |
| <b>17bH</b> | -1037.953943 | -1037.931073 | -1037.930129 | -1038.009434 | 0.002569   | 1.612072                    | 2.14%  |
| <b>17bI</b> | -1037.955129 | -1037.932096 | -1037.931152 | -1038.010980 | 0.001023   | 0.641942                    | 11.03% |
| <b>17bJ</b> | -1037.952229 | -1037.929774 | -1037.928830 | -1038.006576 | 0.005427   | 3.405494                    | 0.10%  |
| <b>17bK</b> | -1037.953621 | -1037.930410 | -1037.929466 | -1038.009994 | 0.002009   | 1.260667                    | 3.88%  |
| <b>17bL</b> | -1037.955175 | -1037.932115 | -1037.931171 | -1038.010661 | 0.001342   | 0.842118                    | 7.87%  |

|                                                                                                               |              |              |              |              |          |          |       |
|---------------------------------------------------------------------------------------------------------------|--------------|--------------|--------------|--------------|----------|----------|-------|
| <b>17bM</b>                                                                                                   | -1037.955170 | -1037.932116 | -1037.931172 | -1038.010586 | 0.001417 | 0.889181 | 7.26% |
| <i>E, E', H, G</i> : total energy, total energy with zero point energy (ZPE), enthalpy, and Gibbs free energy |              |              |              |              |          |          |       |

**Figure S20.** Main conformers of **17b** in NMR calculation.

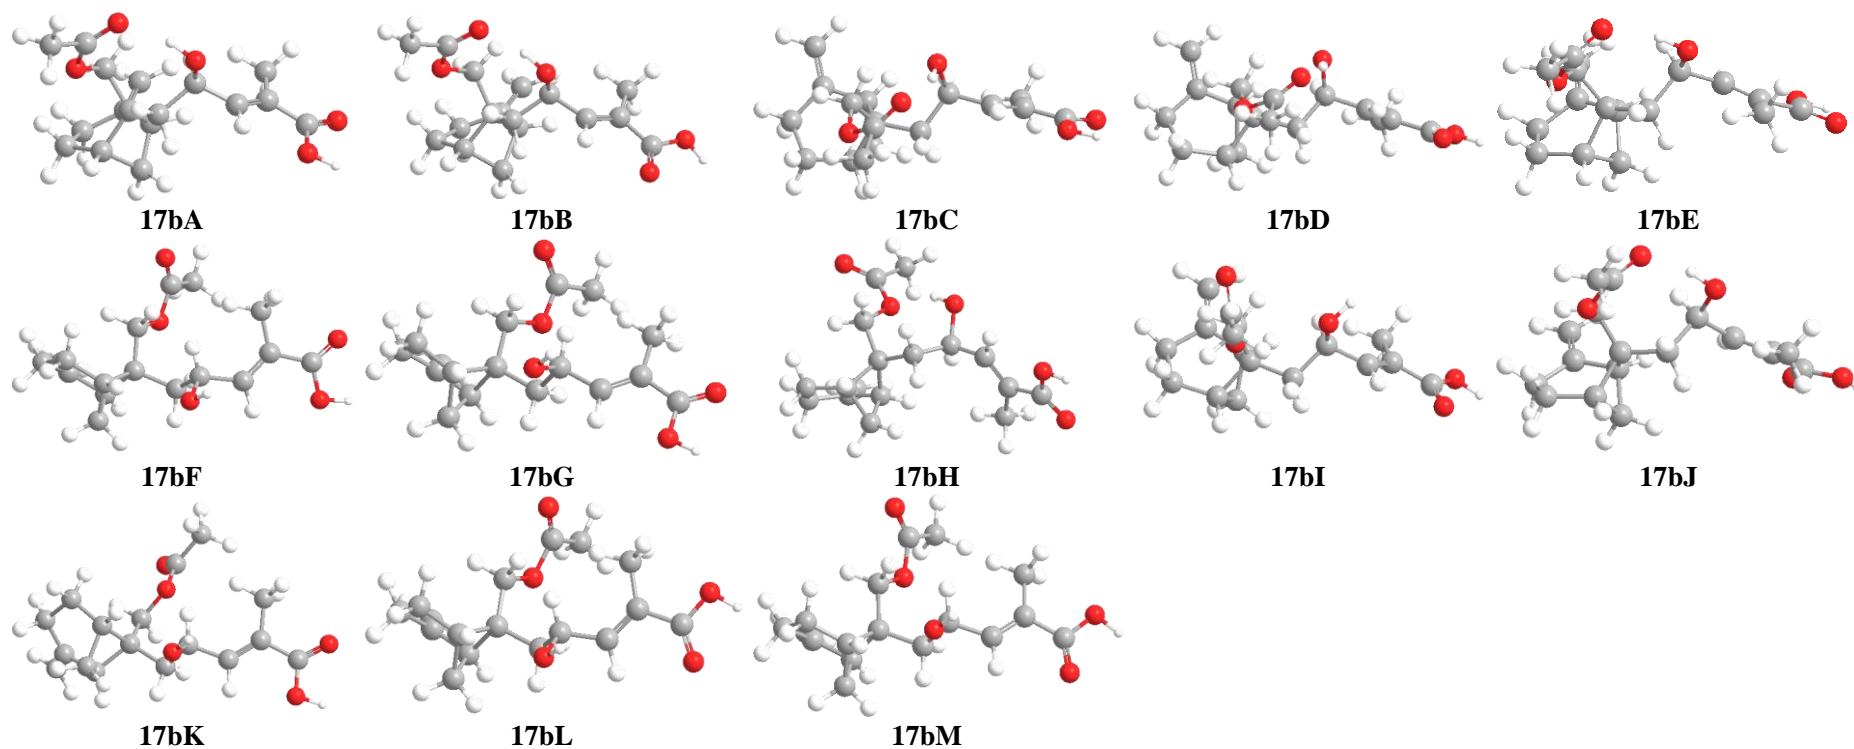

## Section S7. Computational details for **18**

### S7.1. Computational details for **18** (ECD)

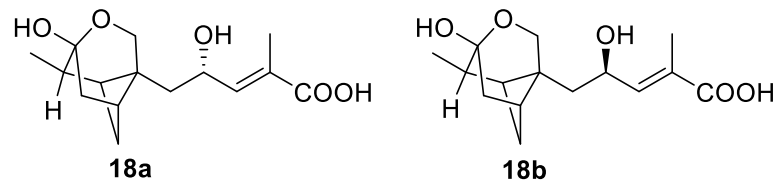

Conformation search based on molecular mechanics with MMFF force fields were performed for **18a** and **18b** gave 15 and 15 stable conformers with populations higher than 1%, respectively. All these conformers were further optimized by the density functional theory method at the B3LYP/6-31G(d) level by Gaussian 16 program package. The ECD were calculated using density functional theory (TDDFT) at B3LYP/6-31+G(d) level in methanol with IEFPCM model. The calculated ECD curves were all generated using SpecDis 1.71 with  $\sigma = 0.30$  eV, UV shift -15 nm, respectively.

**Figure S21.** Comparison of the calculated ECD spectra for possible structure with the experimental spectrum of **18** in methanol with PCM model.

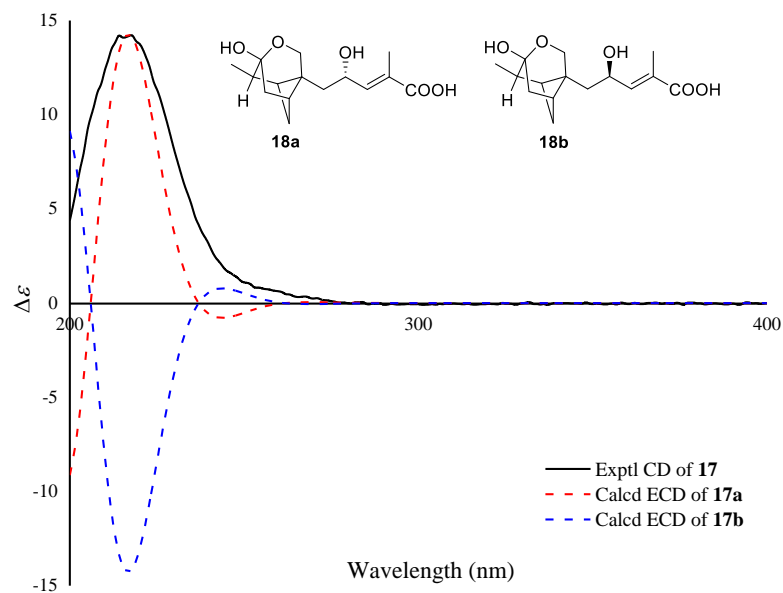

**Table S20.** Energy analysis for conformers of **18aA–18aO** at B3LYP/6-31G(d) level in the gas phase

| Species     | $E'=E+ZPE$  | $E$         | $H$         | $G$         | $\Delta G$ | $\Delta E(\text{kcal/mol})$ | $PE\%$ |
|-------------|-------------|-------------|-------------|-------------|------------|-----------------------------|--------|
| <b>18aA</b> | -960.561201 | -960.541471 | -960.540527 | -960.610254 | 0.000720   | 0.451807                    | 12.44% |
| <b>18aB</b> | -960.561263 | -960.541510 | -960.540566 | -960.610561 | 0.000413   | 0.259161                    | 17.22% |
| <b>18aC</b> | -960.561689 | -960.541944 | -960.540999 | -960.610974 | 0          | 0                           | 26.68% |
| <b>18aD</b> | -960.561723 | -960.541980 | -960.541036 | -960.610728 | 0.000246   | 0.154367                    | 20.56% |
| <b>18aE</b> | -960.557772 | -960.538018 | -960.537074 | -960.606245 | 0.004729   | 2.967492                    | 0.18%  |
| <b>18aF</b> | -960.557257 | -960.537630 | -960.536686 | -960.605515 | 0.005459   | 3.425574                    | 0.08%  |
| <b>18aG</b> | -960.559111 | -960.539480 | -960.538535 | -960.607200 | 0.003774   | 2.368221                    | 0.49%  |
| <b>18aH</b> | -960.560759 | -960.541057 | -960.540113 | -960.609676 | 0.001298   | 0.814507                    | 6.74%  |
| <b>18aI</b> | -960.557588 | -960.538003 | -960.537059 | -960.605721 | 0.005253   | 3.296307                    | 0.10%  |
| <b>18aJ</b> | -960.560599 | -960.540903 | -960.539959 | -960.609559 | 0.001415   | 0.887926                    | 5.95%  |
| <b>18aK</b> | -960.560580 | -960.540882 | -960.539938 | -960.609372 | 0.001602   | 1.005270                    | 4.88%  |
| <b>18aL</b> | -960.557152 | -960.537439 | -960.536495 | -960.605472 | 0.005502   | 3.452557                    | 0.08%  |
| <b>18aM</b> | -960.560295 | -960.540578 | -960.539634 | -960.609233 | 0.001741   | 1.092494                    | 4.22%  |
| <b>18aN</b> | -960.558630 | -960.538988 | -960.538044 | -960.606814 | 0.004160   | 2.610440                    | 0.32%  |
| <b>18aO</b> | -960.557747 | -960.538275 | -960.537331 | -960.605187 | 0.005787   | 3.631397                    | 0.06%  |

$E$ ,  $E'$ ,  $H$ ,  $G$ : total energy, total energy with zero point energy (ZPE), enthalpy, and Gibbs free energy

**Figure S22.** Main conformers of **18a** in ECD calculation.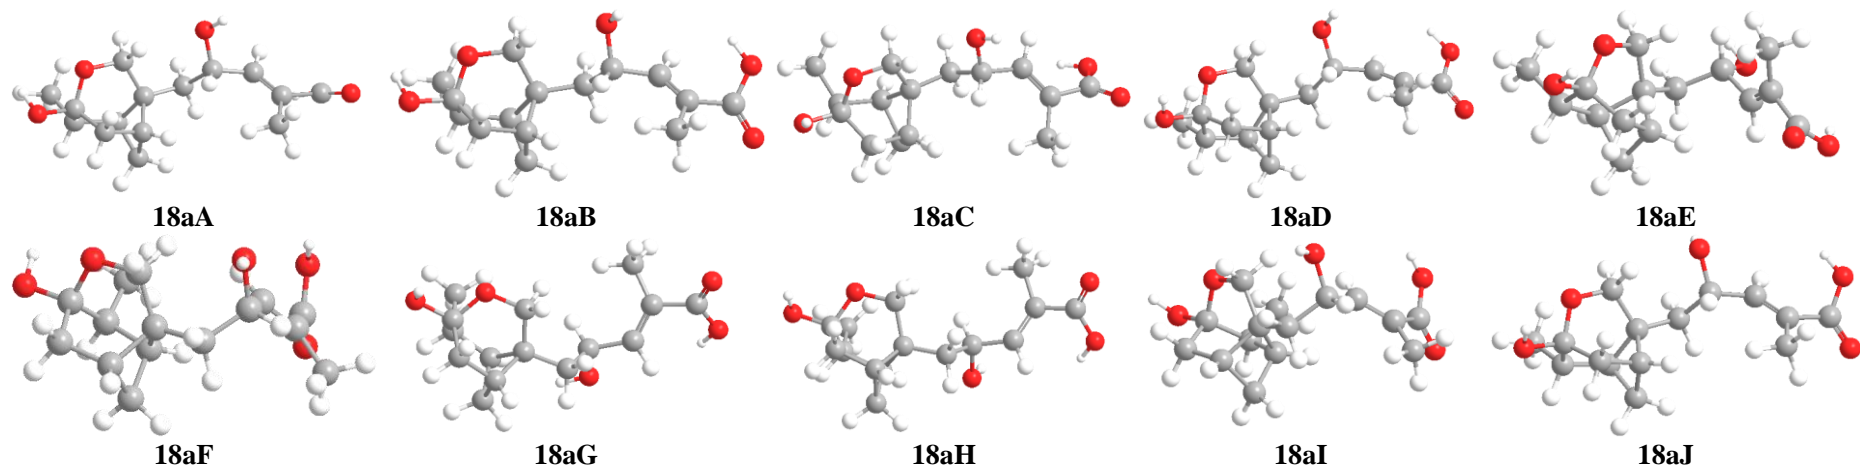



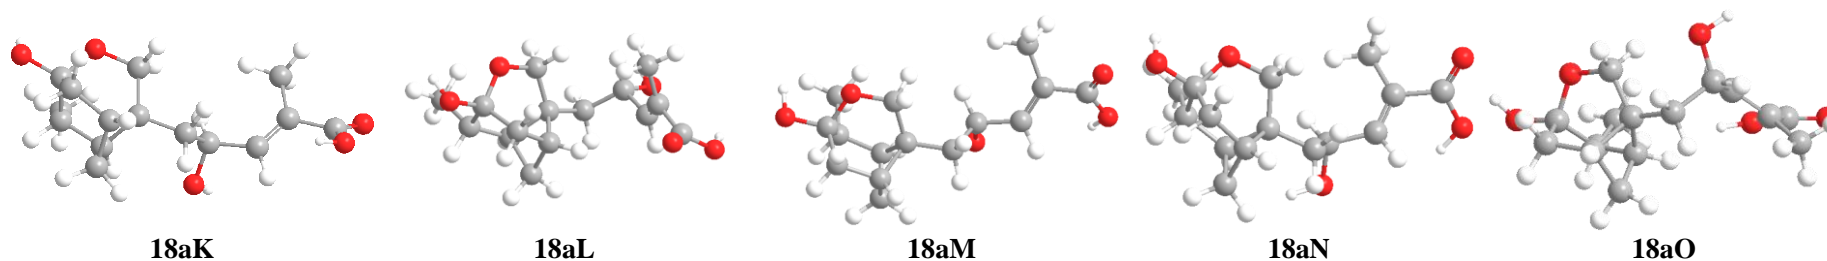

**Table S21.** Energy analysis for conformers of **18bA–18bO** at B3LYP/6-31G(d) level in the gas phase

| Species     | $E'=E+ZPE$  | $E$         | $H$         | $G$         | $\Delta G$ | $\Delta E(\text{kcal/mol})$ | $PE\%$ |
|-------------|-------------|-------------|-------------|-------------|------------|-----------------------------|--------|
| <b>18bA</b> | -960.561660 | -960.541916 | -960.540972 | -960.610939 | 0          | 0                           | 30.89% |
| <b>18bB</b> | -960.561246 | -960.541492 | -960.540548 | -960.610729 | 0.000210   | 0.131777                    | 24.73% |
| <b>18bC</b> | -960.557222 | -960.537523 | -960.536579 | -960.605340 | 0.005599   | 3.513426                    | 0.08%  |
| <b>18bD</b> | -960.557619 | -960.537922 | -960.536977 | -960.605701 | 0.005238   | 3.286895                    | 0.12%  |
| <b>18bE</b> | -960.560570 | -960.540854 | -960.539910 | -960.609889 | 0.001050   | 0.658885                    | 10.15% |
| <b>18bF</b> | -960.557739 | -960.538128 | -960.537183 | -960.605867 | 0.005072   | 3.182728                    | 0.14%  |
| <b>18bG</b> | -960.561247 | -960.541528 | -960.540584 | -960.610209 | 0.000730   | 0.458082                    | 14.25% |
| <b>18bH</b> | -960.560178 | -960.540471 | -960.539527 | -960.609523 | 0.001416   | 0.888553                    | 6.89%  |
| <b>18bI</b> | -960.558765 | -960.539080 | -960.538136 | -960.607242 | 0.003697   | 2.319903                    | 0.61%  |
| <b>18bJ</b> | -960.560659 | -960.540957 | -960.540013 | -960.609619 | 0.001320   | 0.828313                    | 7.63%  |
| <b>18bK</b> | -960.558814 | -960.539218 | -960.538274 | -960.606926 | 0.004013   | 2.518196                    | 0.44%  |
| <b>18bL</b> | -960.559207 | -960.539530 | -960.538586 | -960.607645 | 0.003294   | 2.067016                    | 0.94%  |
| <b>18bM</b> | -960.557203 | -960.537608 | -960.536663 | -960.605332 | 0.005607   | 3.518446                    | 0.08%  |
| <b>18bN</b> | -960.559270 | -960.539651 | -960.538707 | -960.607454 | 0.003485   | 2.186871                    | 0.77%  |
| <b>18bO</b> | -960.559280 | -960.539695 | -960.538751 | -960.608480 | 0.002459   | 1.543046                    | 2.28%  |

$E$ ,  $E'$ ,  $H$ ,  $G$ : total energy, total energy with zero point energy ( $ZPE$ ), enthalpy, and Gibbs free energy

**Figure S23.** Main conformers of **18b** in ECD calculation.

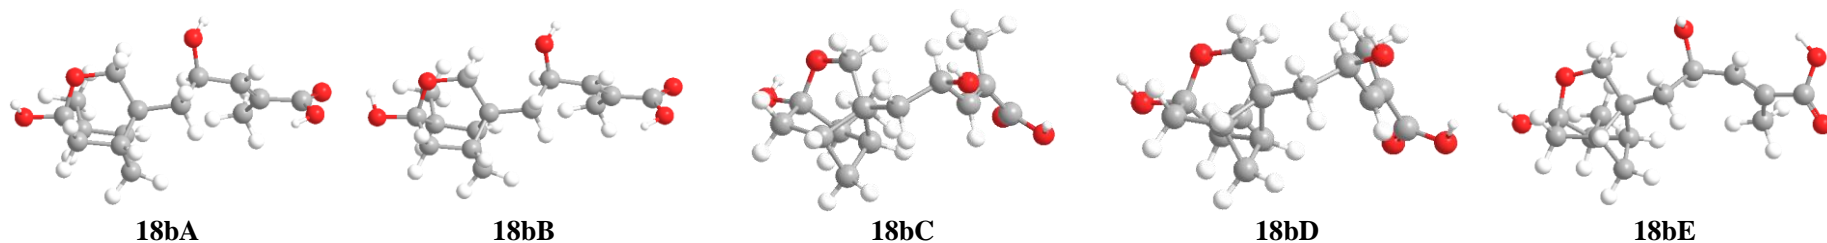

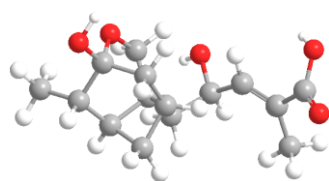

**18bF**

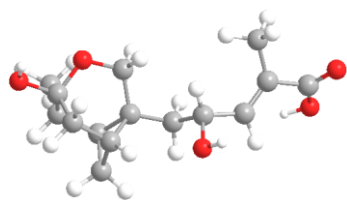

**18bG**

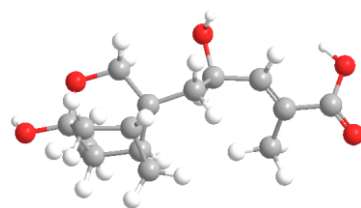

**18bH**

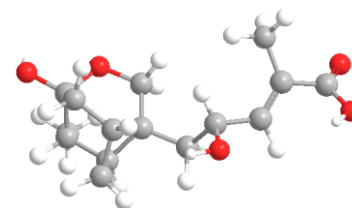

**18bI**

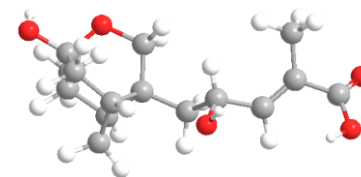

**18bJ**

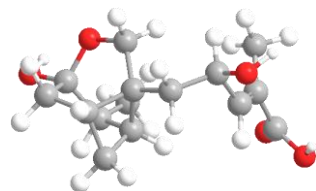

**18bK**

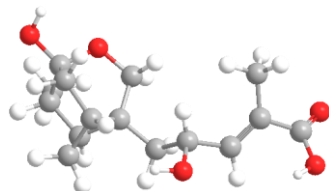

**18bL**

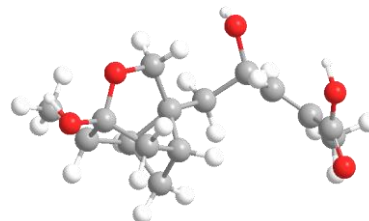

**18bM**

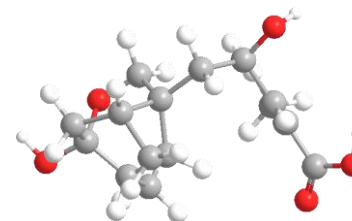

**18bN**

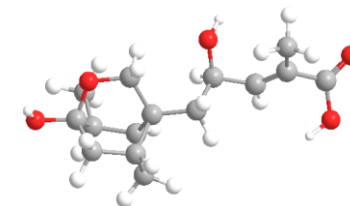

**18bO**

## References

- (1) Hehre, W. J. A guide to molecular mechanics and quantum chemical calculations. *Wavefunction, Inc., Irvine, CA* **2003**, 1-812.
- (2) Shao, Y.; Molnar, L. F.; Jung, Y.; Kussmann, J.; Ochsenfeld, C.; Brown, S. T.; Gilbert, A. T. B.; Slipchenko, L. V.; Levchenko, S. V.; O'Neill, D. P.; DiStasio Jr, R. A.; Lochan, R. C.; Wang, T.; Beran, G. J. O.; Besley, N. A.; Herbert, J. M.; Yeh Lin, C.; Van Voorhis, T.; Hung Chien, S.; Sodt, A.; Steele, R. P.; Rassolov, V. A.; Maslen, P. E.; Korambath, P. P.; Adamson, R. D.; Austin, B.; Baker, J.; Byrd, E. F. C.; Dachsel, H.; Doerksen, R. J.; Dreuw, A.; Dunietz, B. D.; Dutoi, A. D.; Furlani, T. R.; Gwaltney, S. R.; Heyden, A.; Hirata, S.; Hsu, C.-P.; Kedziora, G.; Khalliulin, R. Z.; Klunzinger, P.; Lee, A. M.; Lee, M. S.; Liang, W.; Lotan, I.; Nair, N.; Peters, B.; Proynov, E. I.; Pieniazek, P. A.; Min Rhee, Y.; Ritchie, J.; Rosta, E.; David Sherrill, C.; Simmonett, A. C.; Subotnik, J. E.; Lee Woodcock Iii, H.; Zhang, W.; Bell, A. T.; Chakraborty, A. K.; Chipman, D. M.; Keil, F. J.; Warshel, A.; Hehre, W. J.; Schaefer Iii, H. F.; Kong, J.; Krylov, A. I.; Gill, P. M. W.; Head-Gordon, M. *Phys. Chem. Chem. Phys.* **2006**, 8, 3172-3191.
- (3) Frisch, M. J.; Trucks, G. W.; Schlegel, H. B.; Scuseria, G. E.; Robb, M. A.; Cheeseman, J. R.; Scalmani, G.; Barone, V.; Petersson, G. A.; Nakatsuji, H.; Li, X.; Caricato, M.; Marenich, A.; Bloino, J.; Janesko, B. G.; Gomperts, R.; Mennucci, B.; Hratchian, H. P.; Ortiz, J. V.; Izmaylov, A. F.; Sonnenberg, J. L.; Williams-Young, D.; Ding, F.; Lipparini, F.; Egidi, F.; Goings, J.; Peng, B.; Petrone, A.; Henderson, T.; Ranasinghe, D.; Zakrzewski, V. G.; Gao, J.; Rega, N.; Zheng, G.; Liang, W.; Hada, M.; Ehara, M.; Toyota, K.; Fukuda, R.; Hasegawa, J.; Ishida, M.; Nakajima, T.; Honda, Y.; Kitao, O.; Nakai, H.; Vreven, T.; Throssell, K.; Montgomery, J. A., Jr.; Peralta, J. E.; Ogliaro, F.; Bearpark, M.; Heyd, J. J.; Brothers, E.; Kudin, K. N.; Staroverov, V. N.; Keith, T.; Kobayashi, R.; Normand, J.; Raghavachari, K.; Rendell, A.; Burant, J. C.; Iyengar, S. S.; Tomasi, J.; Cossi, M.; Millam, J. M.; Klene, M.; Adamo, C.; Cammi, R.; Ochterski, J. W.; Martin, R. L.; Morokuma, K.; Farkas, O.; Foresman, J. B.; Fox, D. J. *Gaussian 16, Revision B.01* Gaussian, Inc. Wallingford CT, **2016**.
- (4) Grimblat, N.; Zanardi, M. M.; Sarotti, A. M. *J. Org. Chem.* **2015**, 80, 12526-12534.
- (5) Bruhn, T.; Schaumlöffel, A.; Hemberger, Y.; Bringmann, G. *Chirality* **2013**, 25, 243-249.

## Section S8. NMR and MS spectra for **1**

**Figure S24.**  $^1\text{H}$  NMR of compound **1** in  $\text{CD}_3\text{OD}$

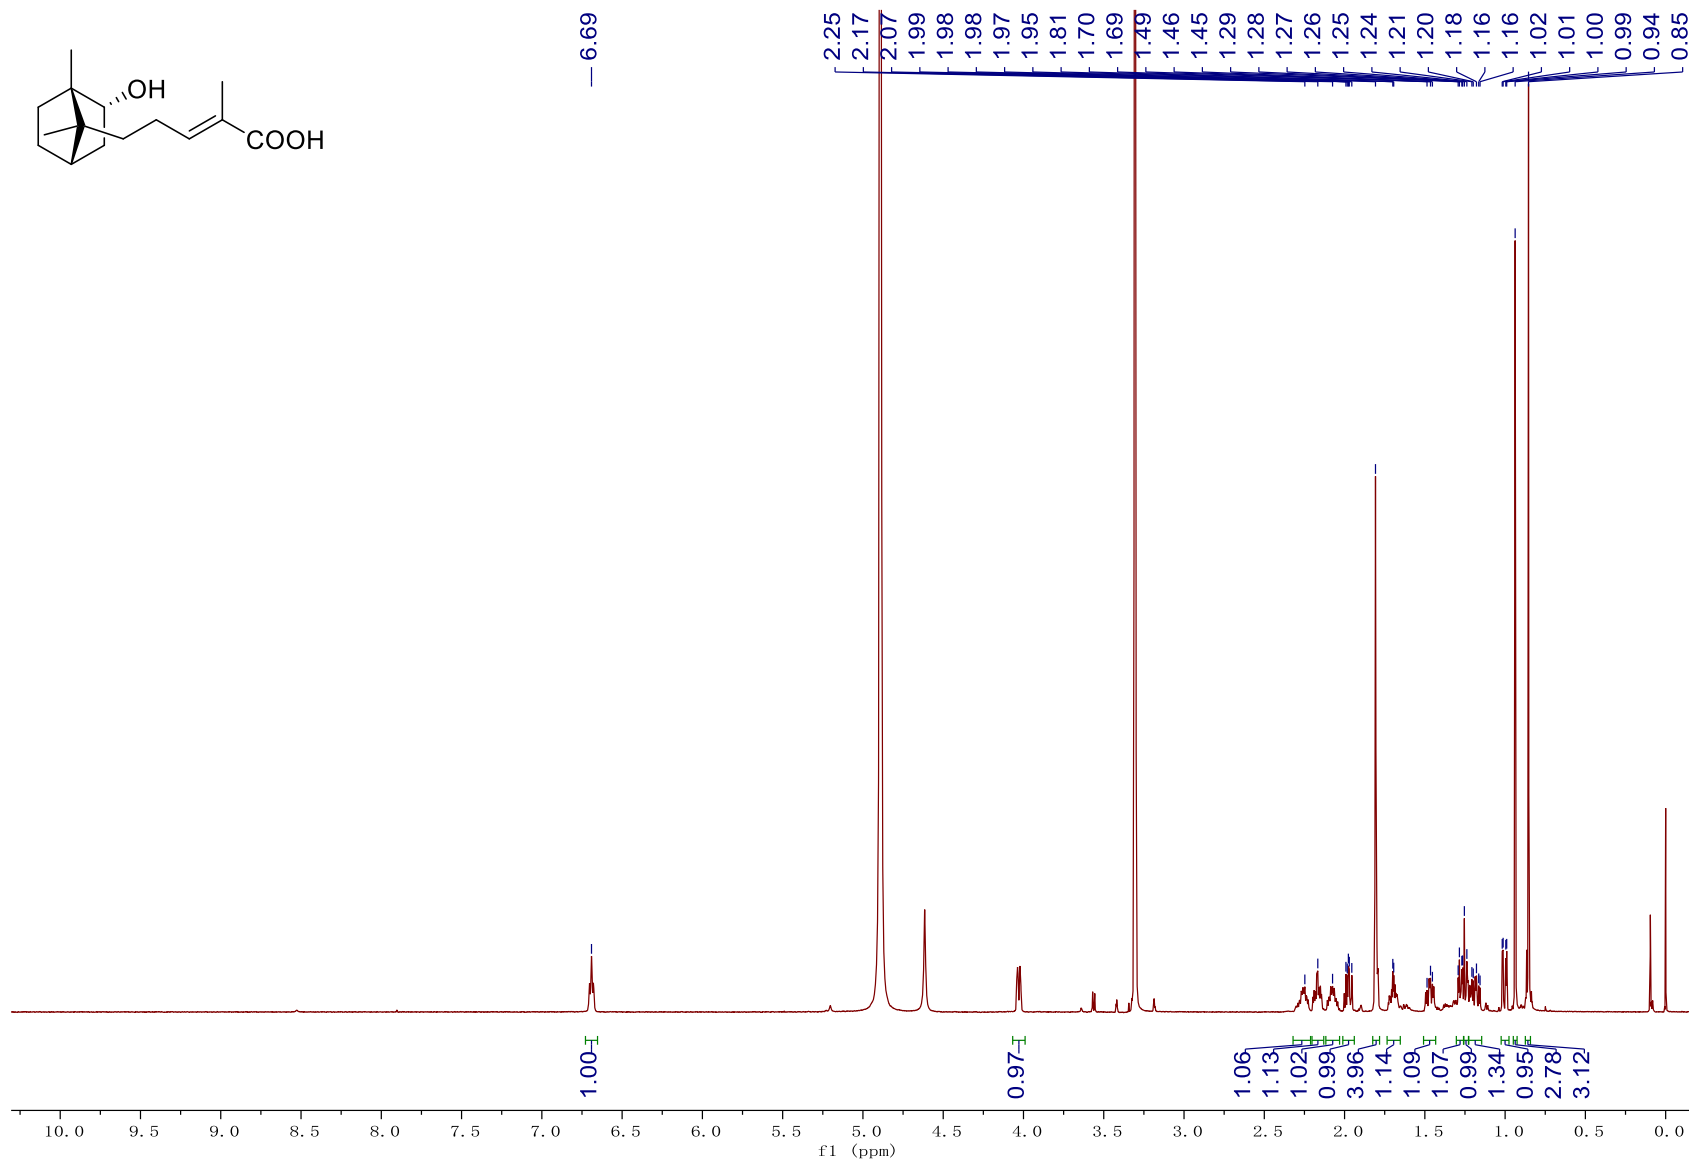

**Figure S25.**  $^{13}\text{C}$  NMR and DEPT of compound **1** in  $\text{CD}_3\text{OD}$

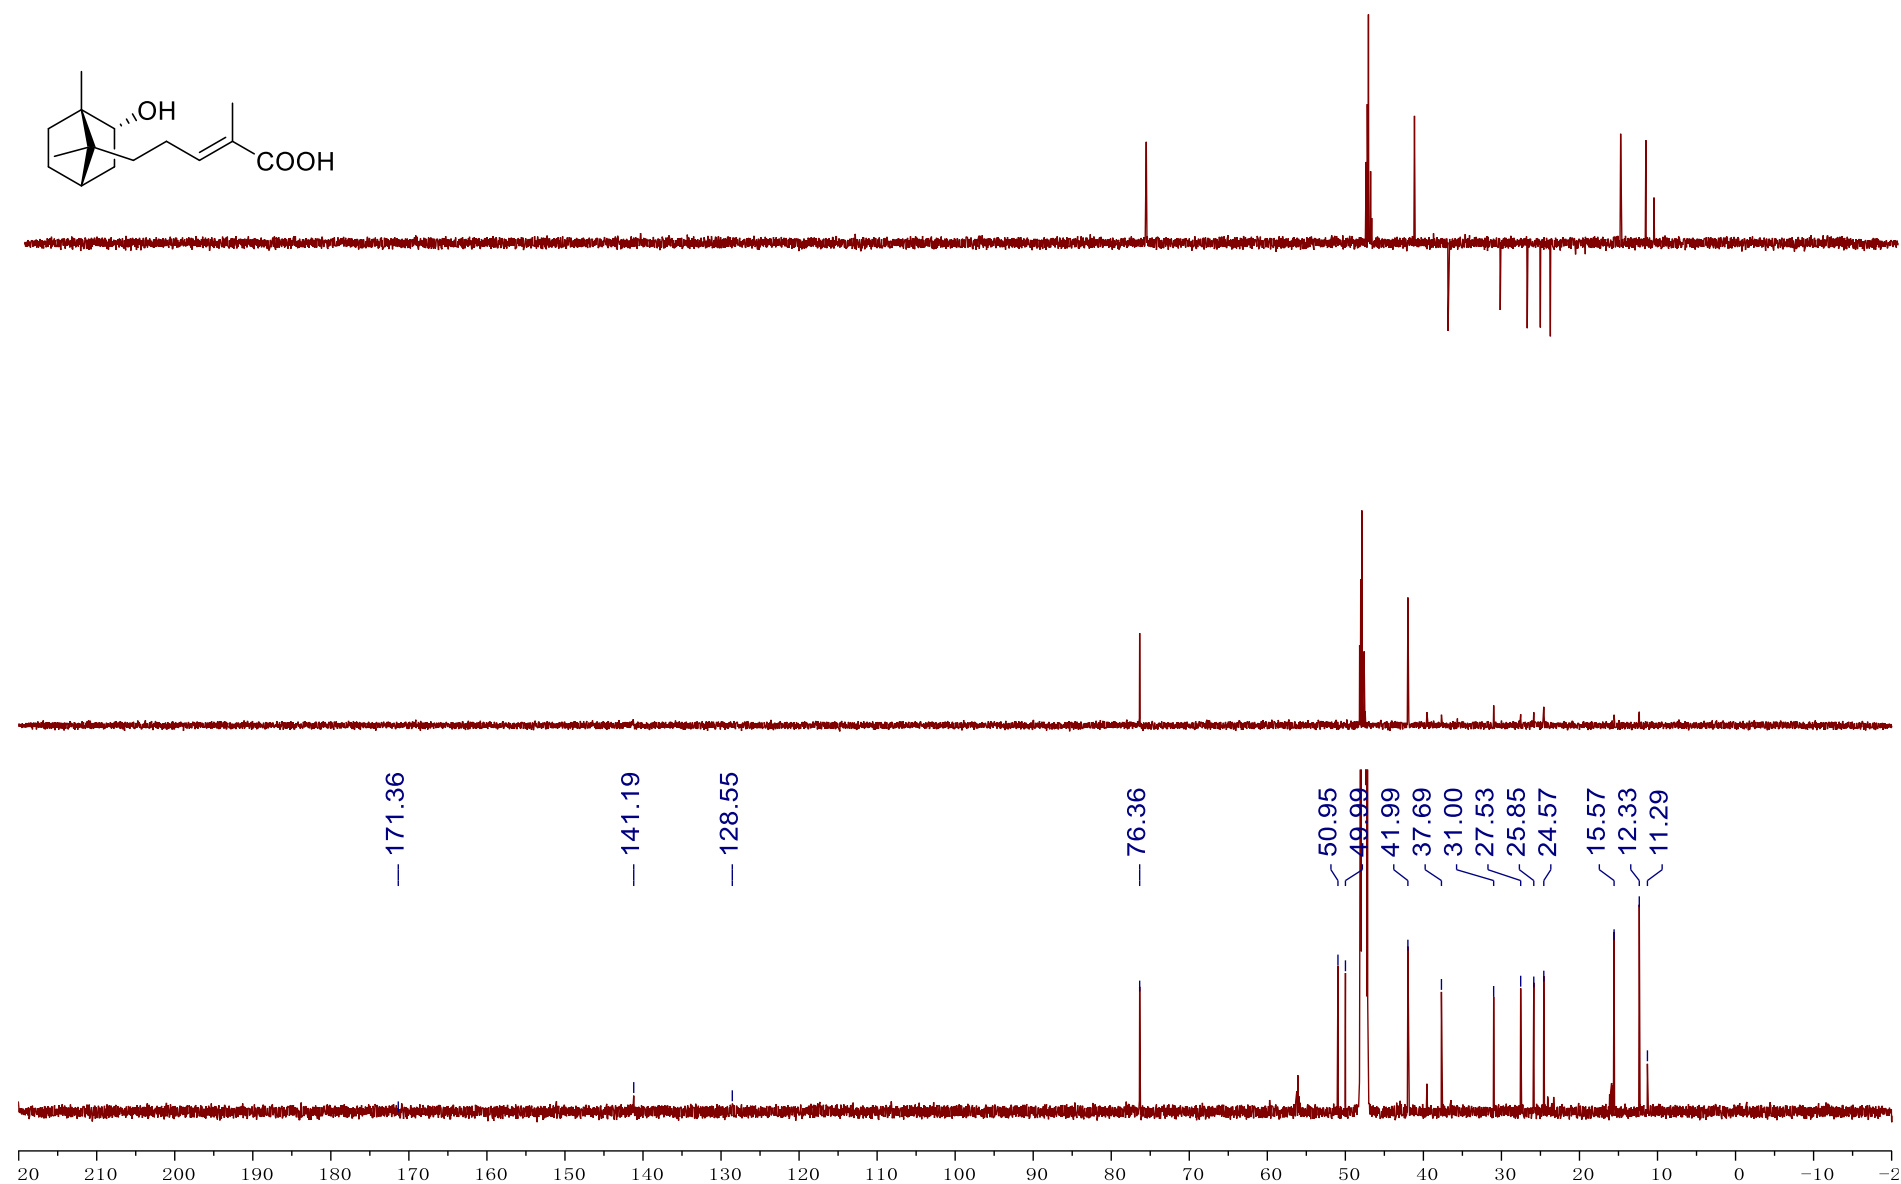

**Figure S26.** HSQC of compound **1** in CD<sub>3</sub>OD

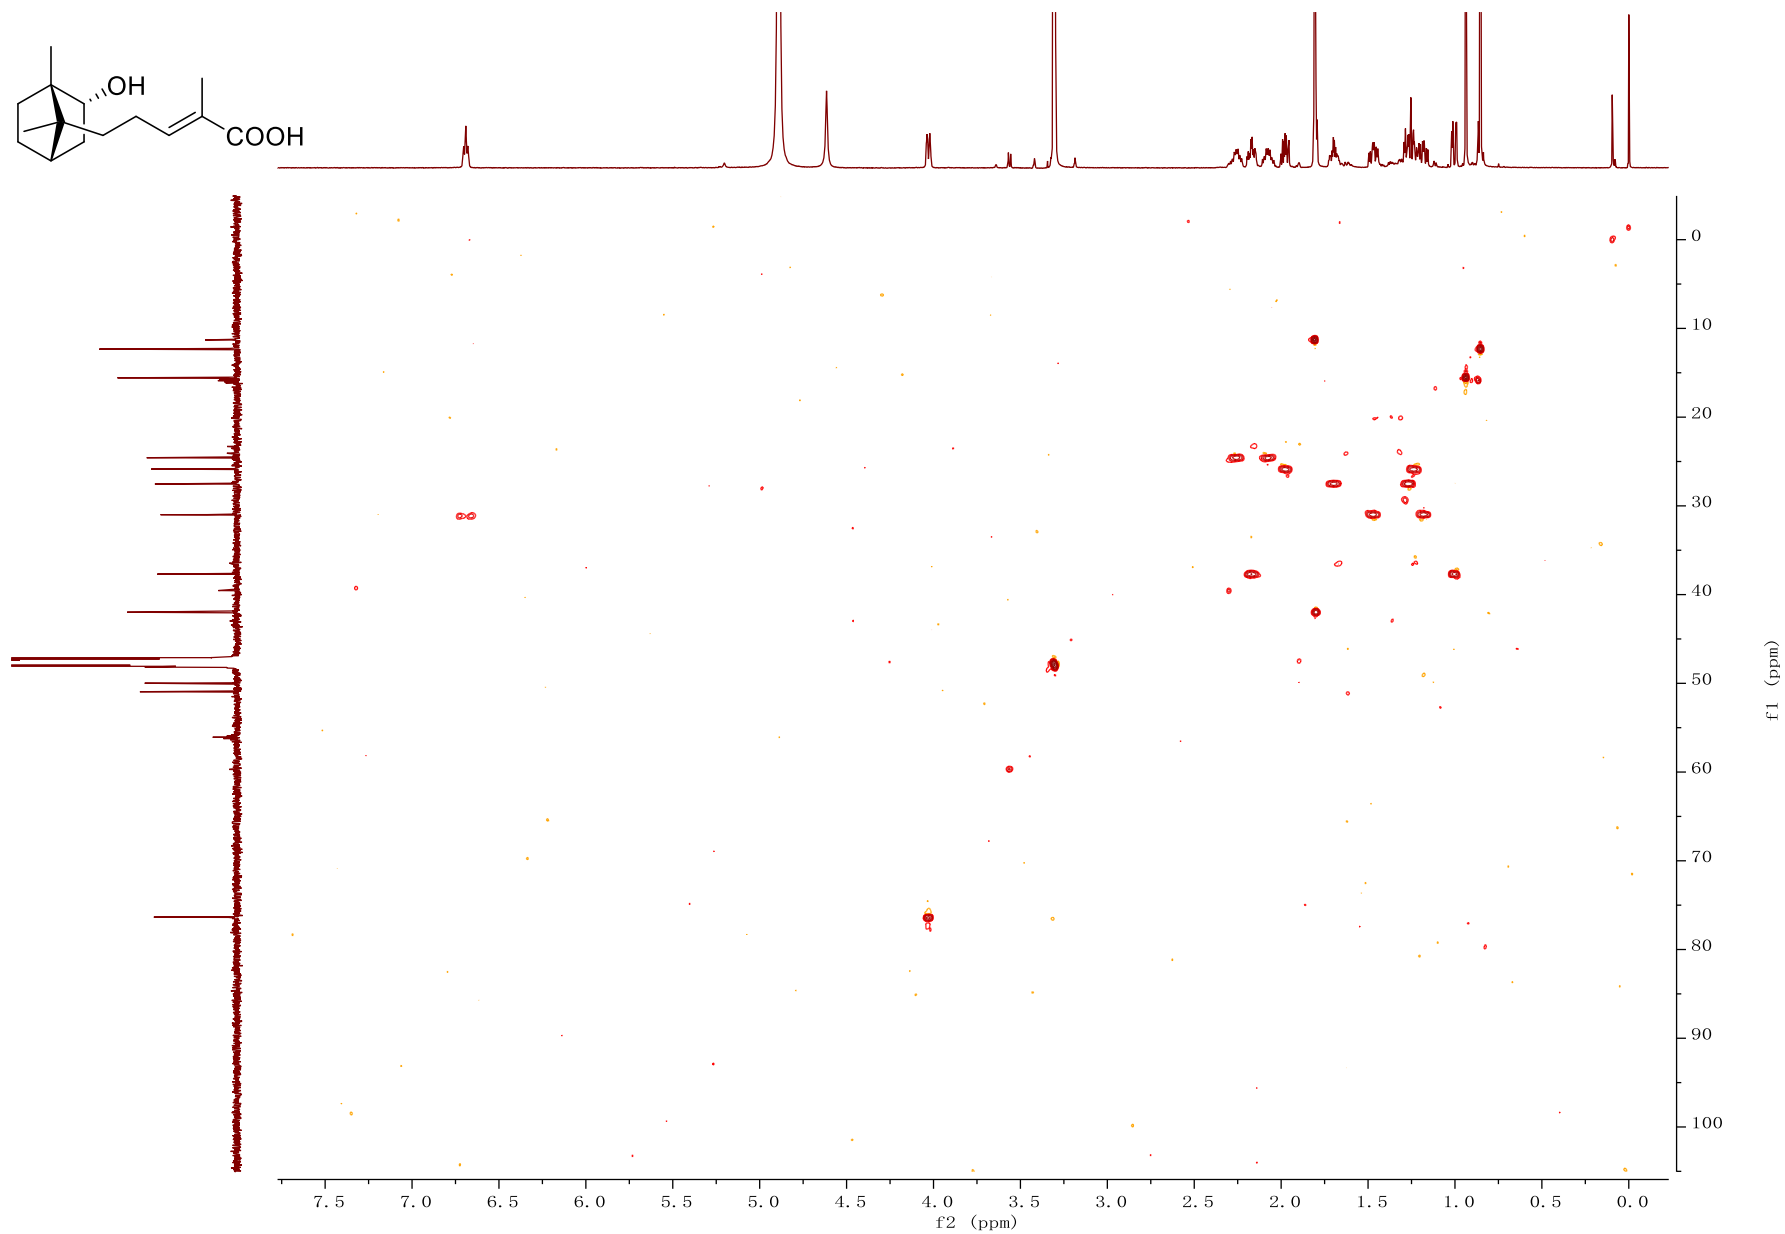



**Figure S28.**  $^1\text{H}$ - $^1\text{H}$  COSY of compound **1** in  $\text{CD}_3\text{OD}$

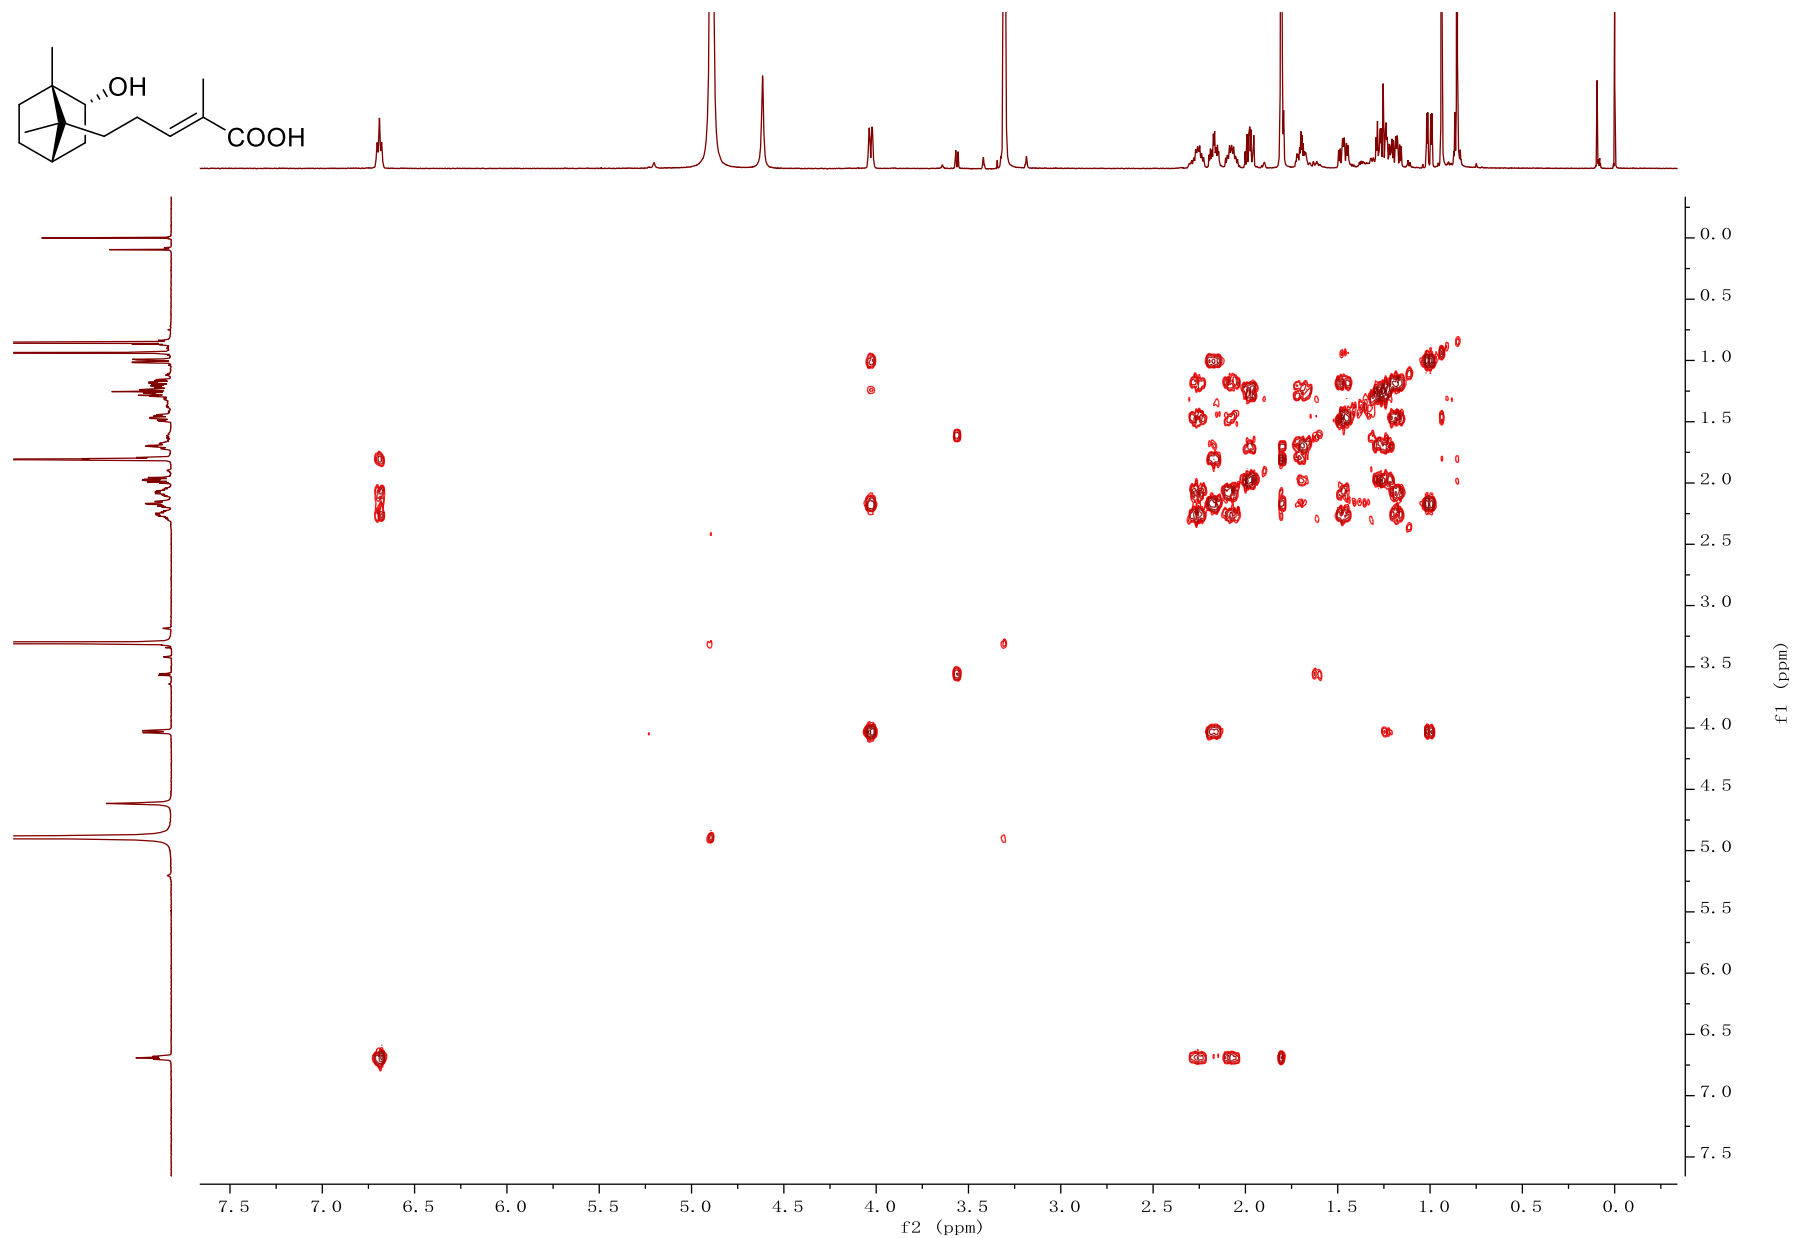



**Figure S29.** ROESY of compound **1** in CD<sub>3</sub>OD

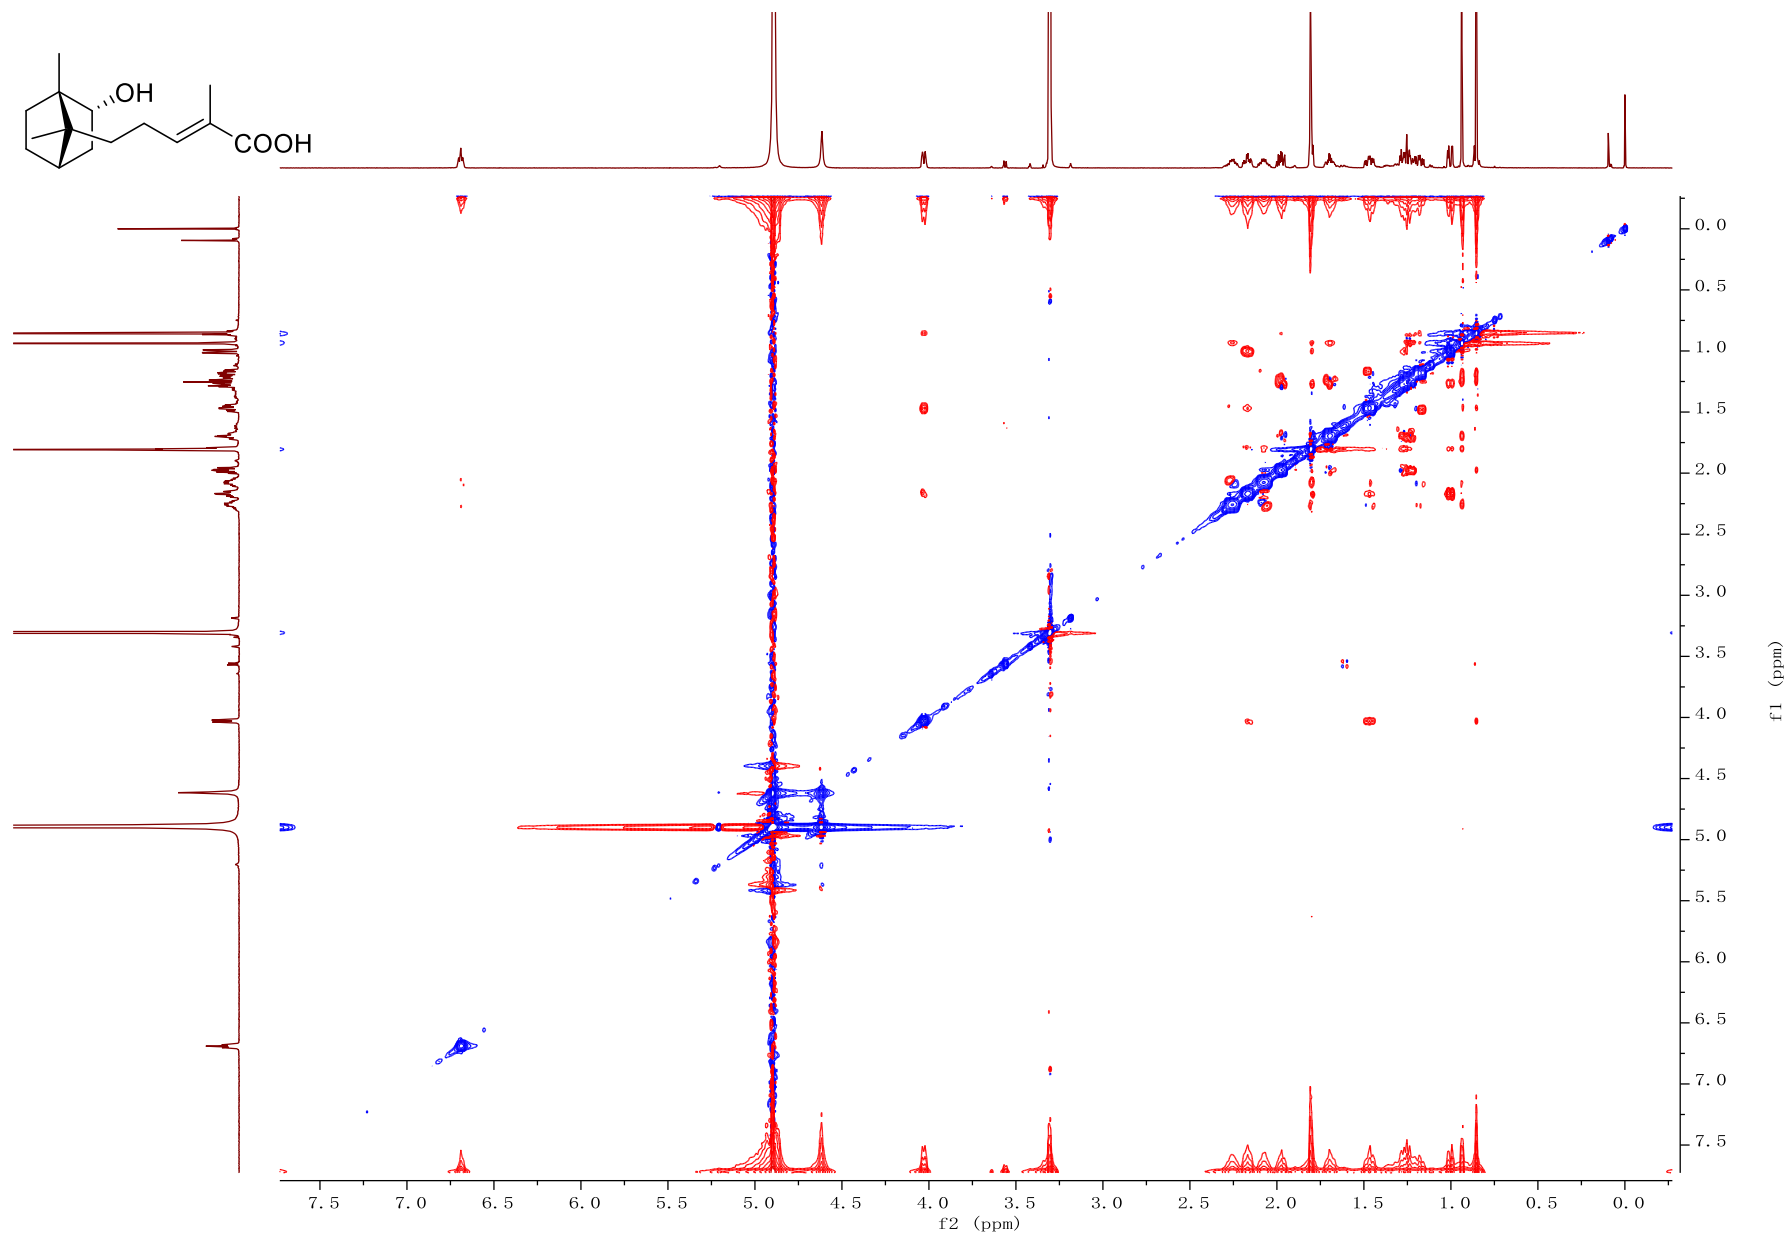

FTMS+ p ESI Full lock ms [100.0000-600.0000]

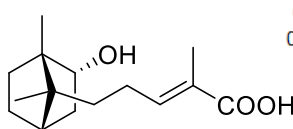

## Section S9. NMR and MS spectra for 2

Figure S31.  $^1\text{H}$  NMR of compound **2** in  $\text{CD}_3\text{OD}$

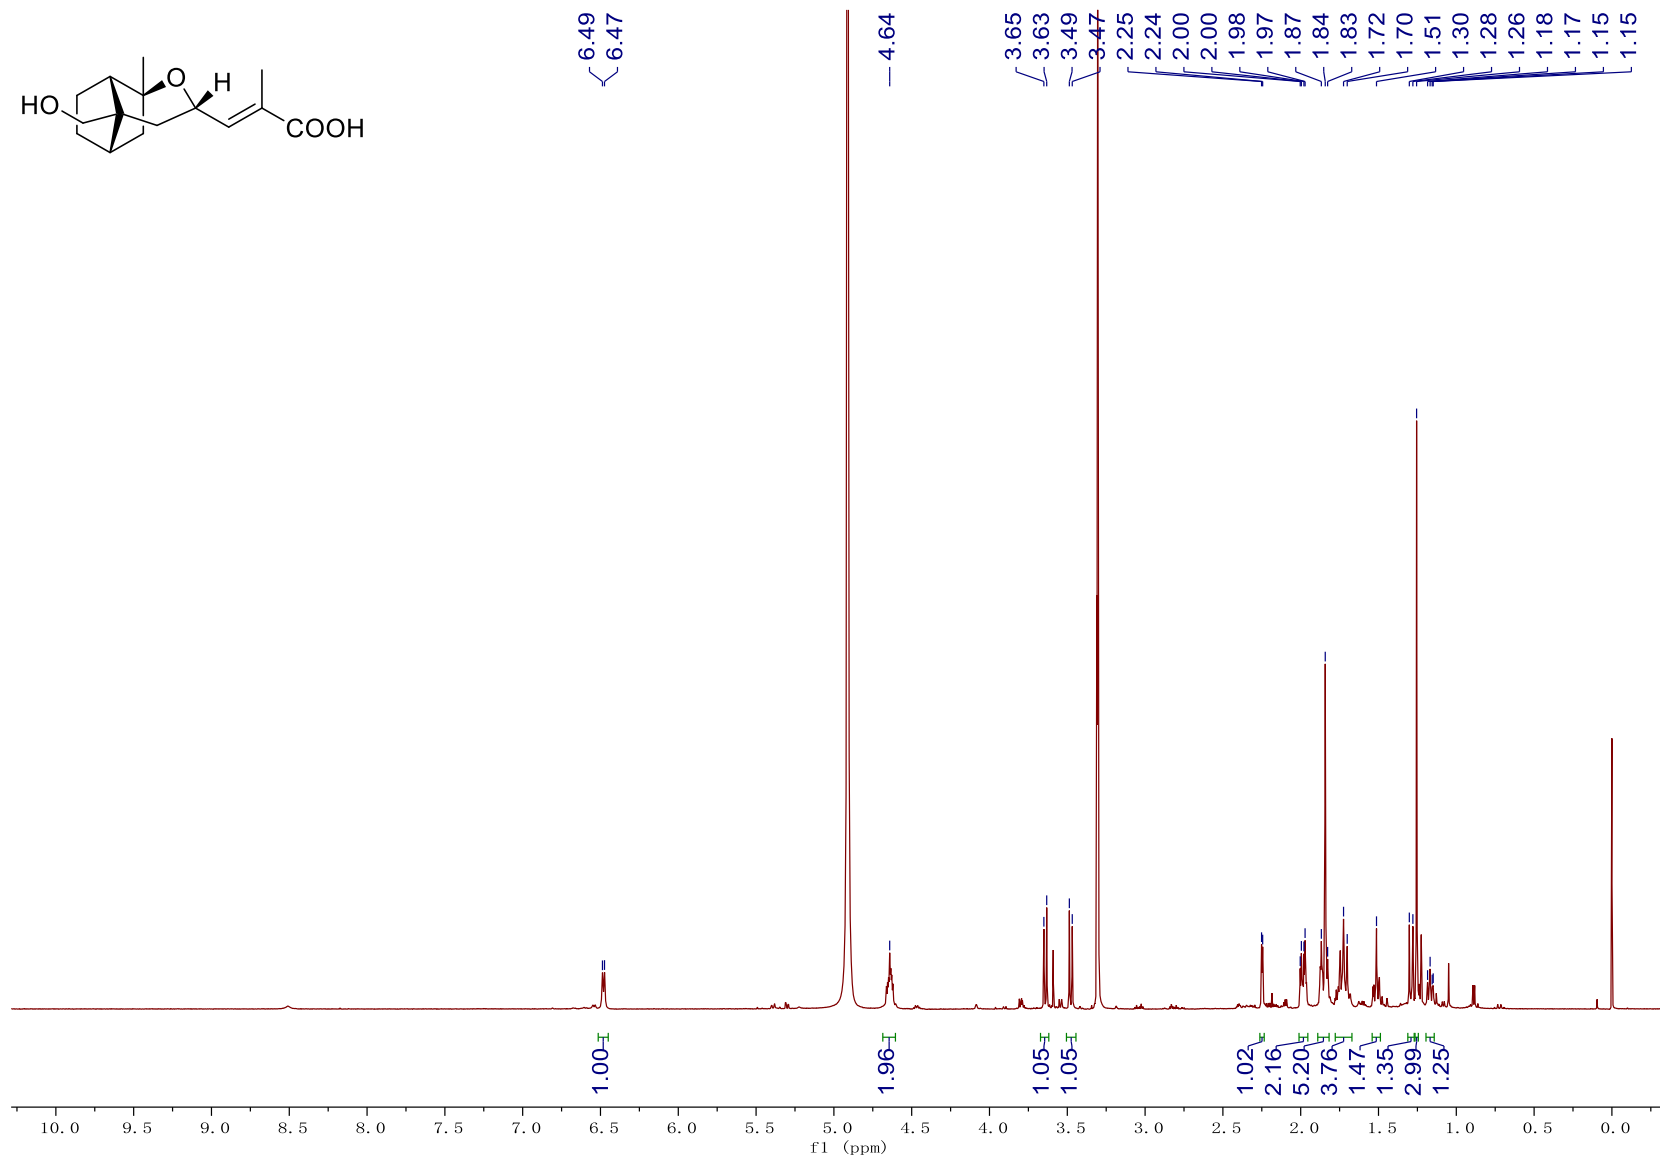

**Figure S32.**  $^{13}\text{C}$  NMR and DEPT of compound **2** in  $\text{CD}_3\text{OD}$

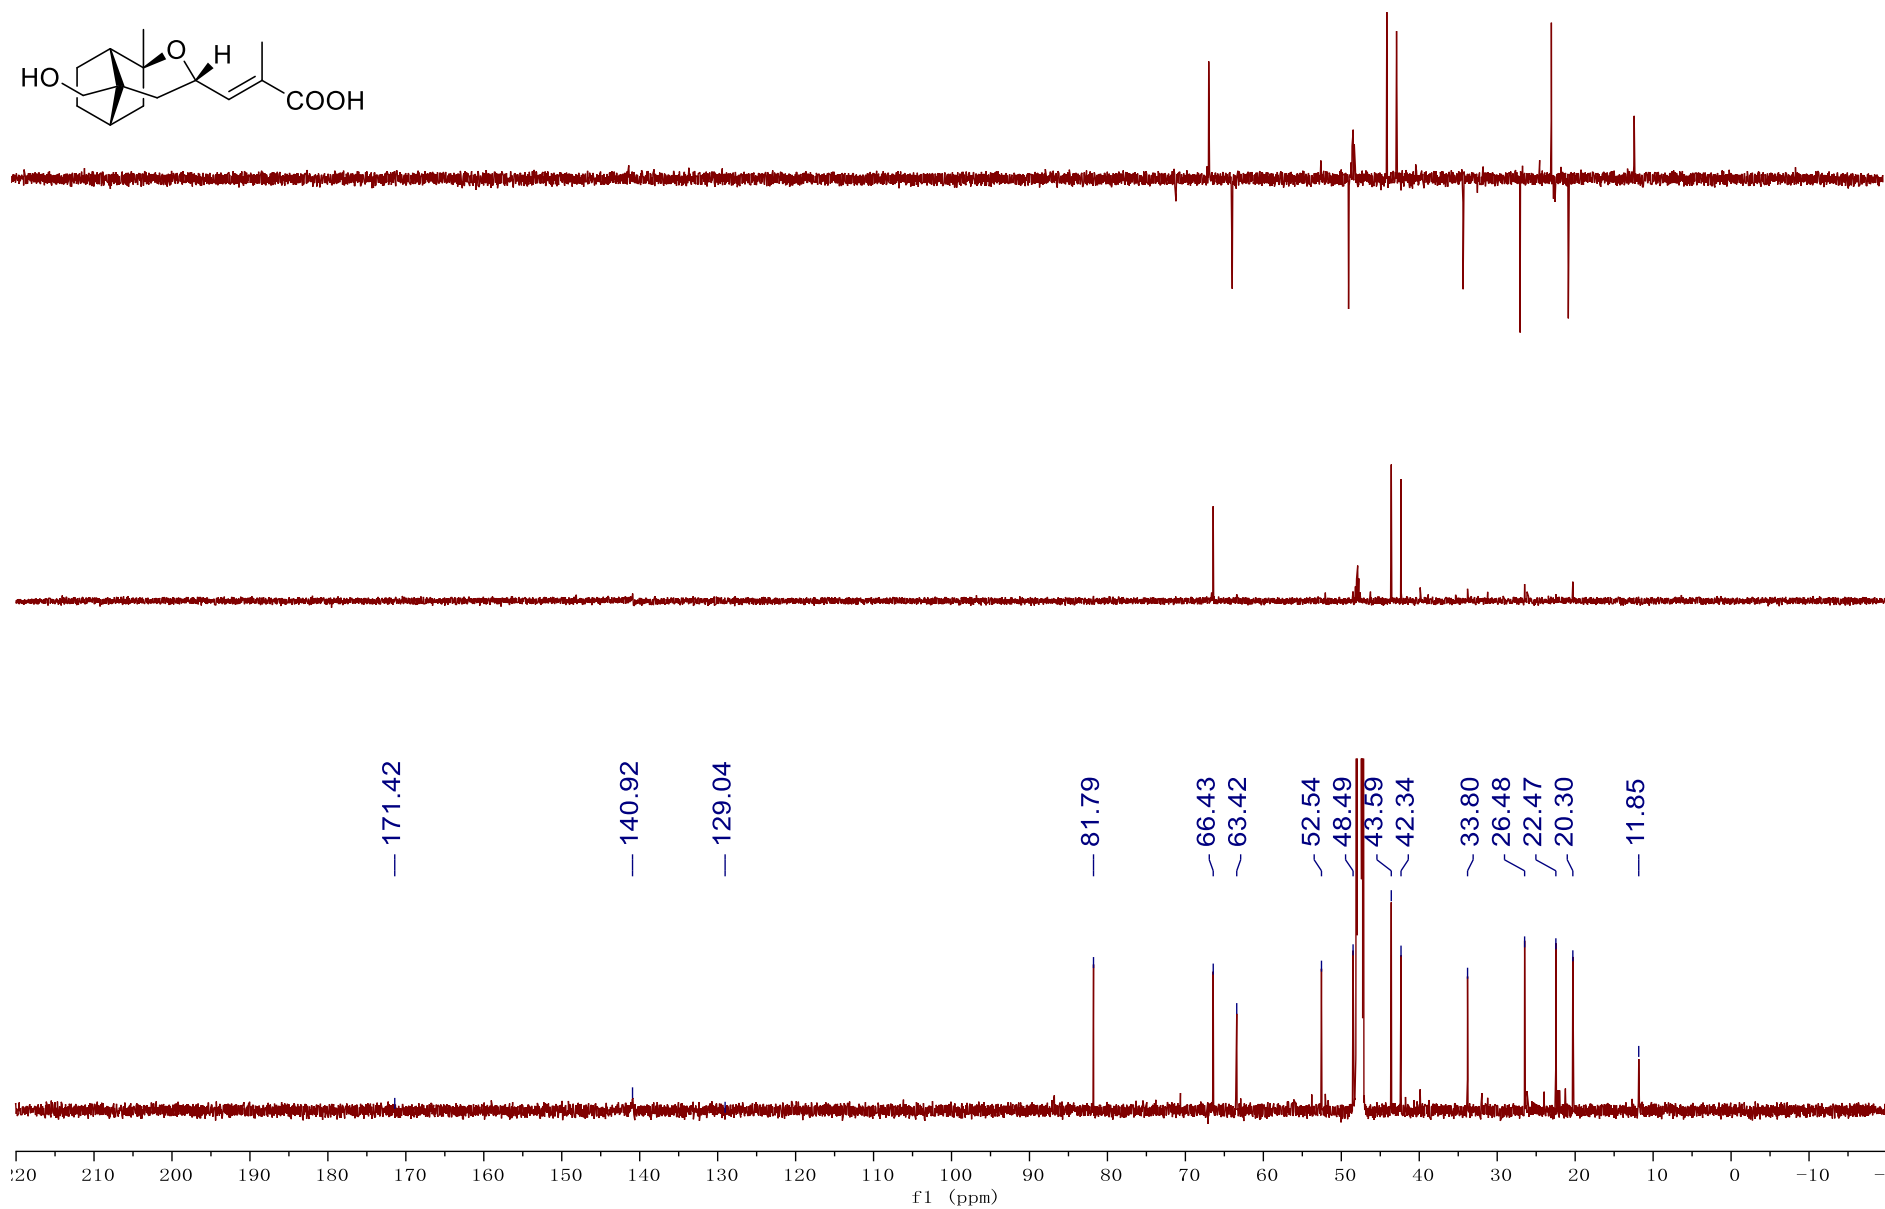

**Figure S33.** HSQC of compound **2** in CD<sub>3</sub>OD

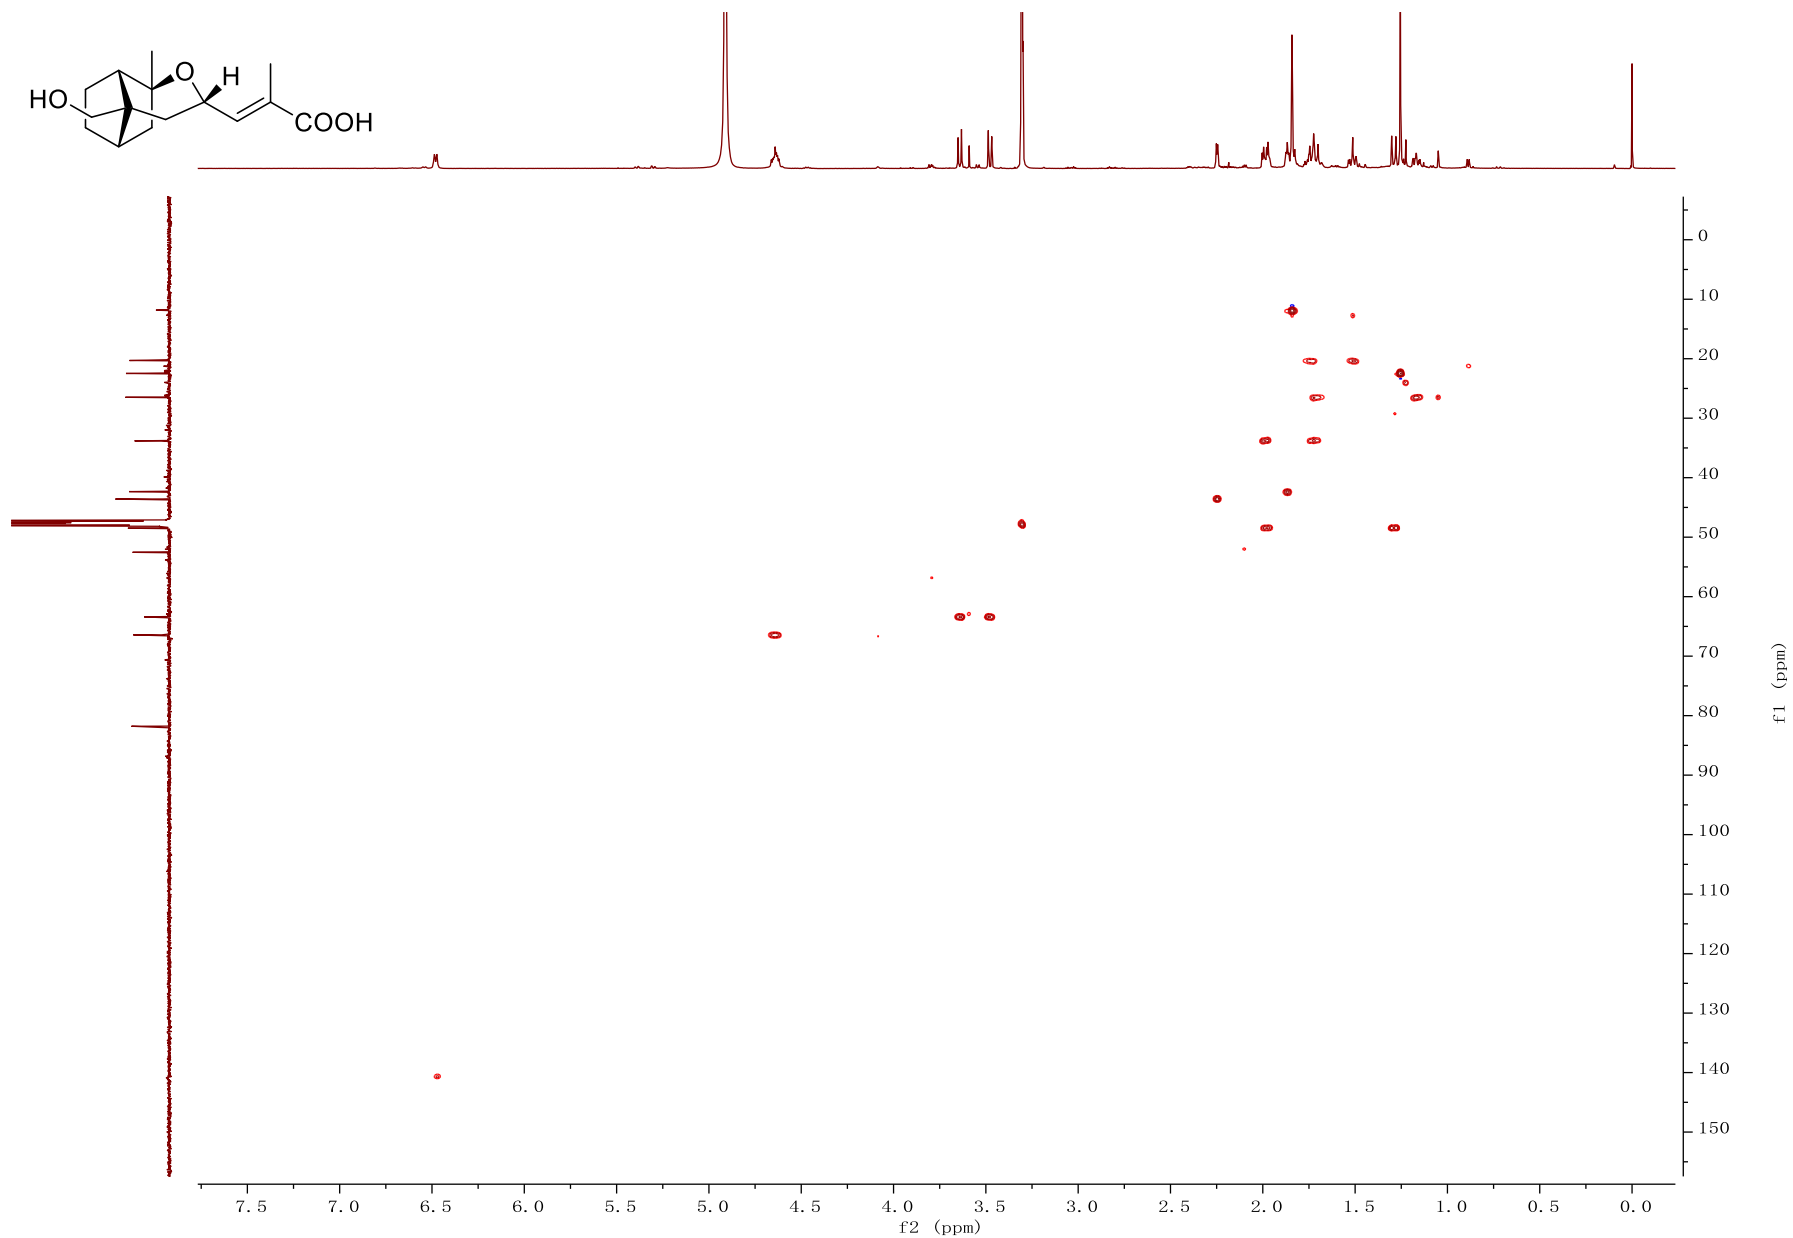

**Figure S34.** HMBC of compound **2** in CD<sub>3</sub>OD

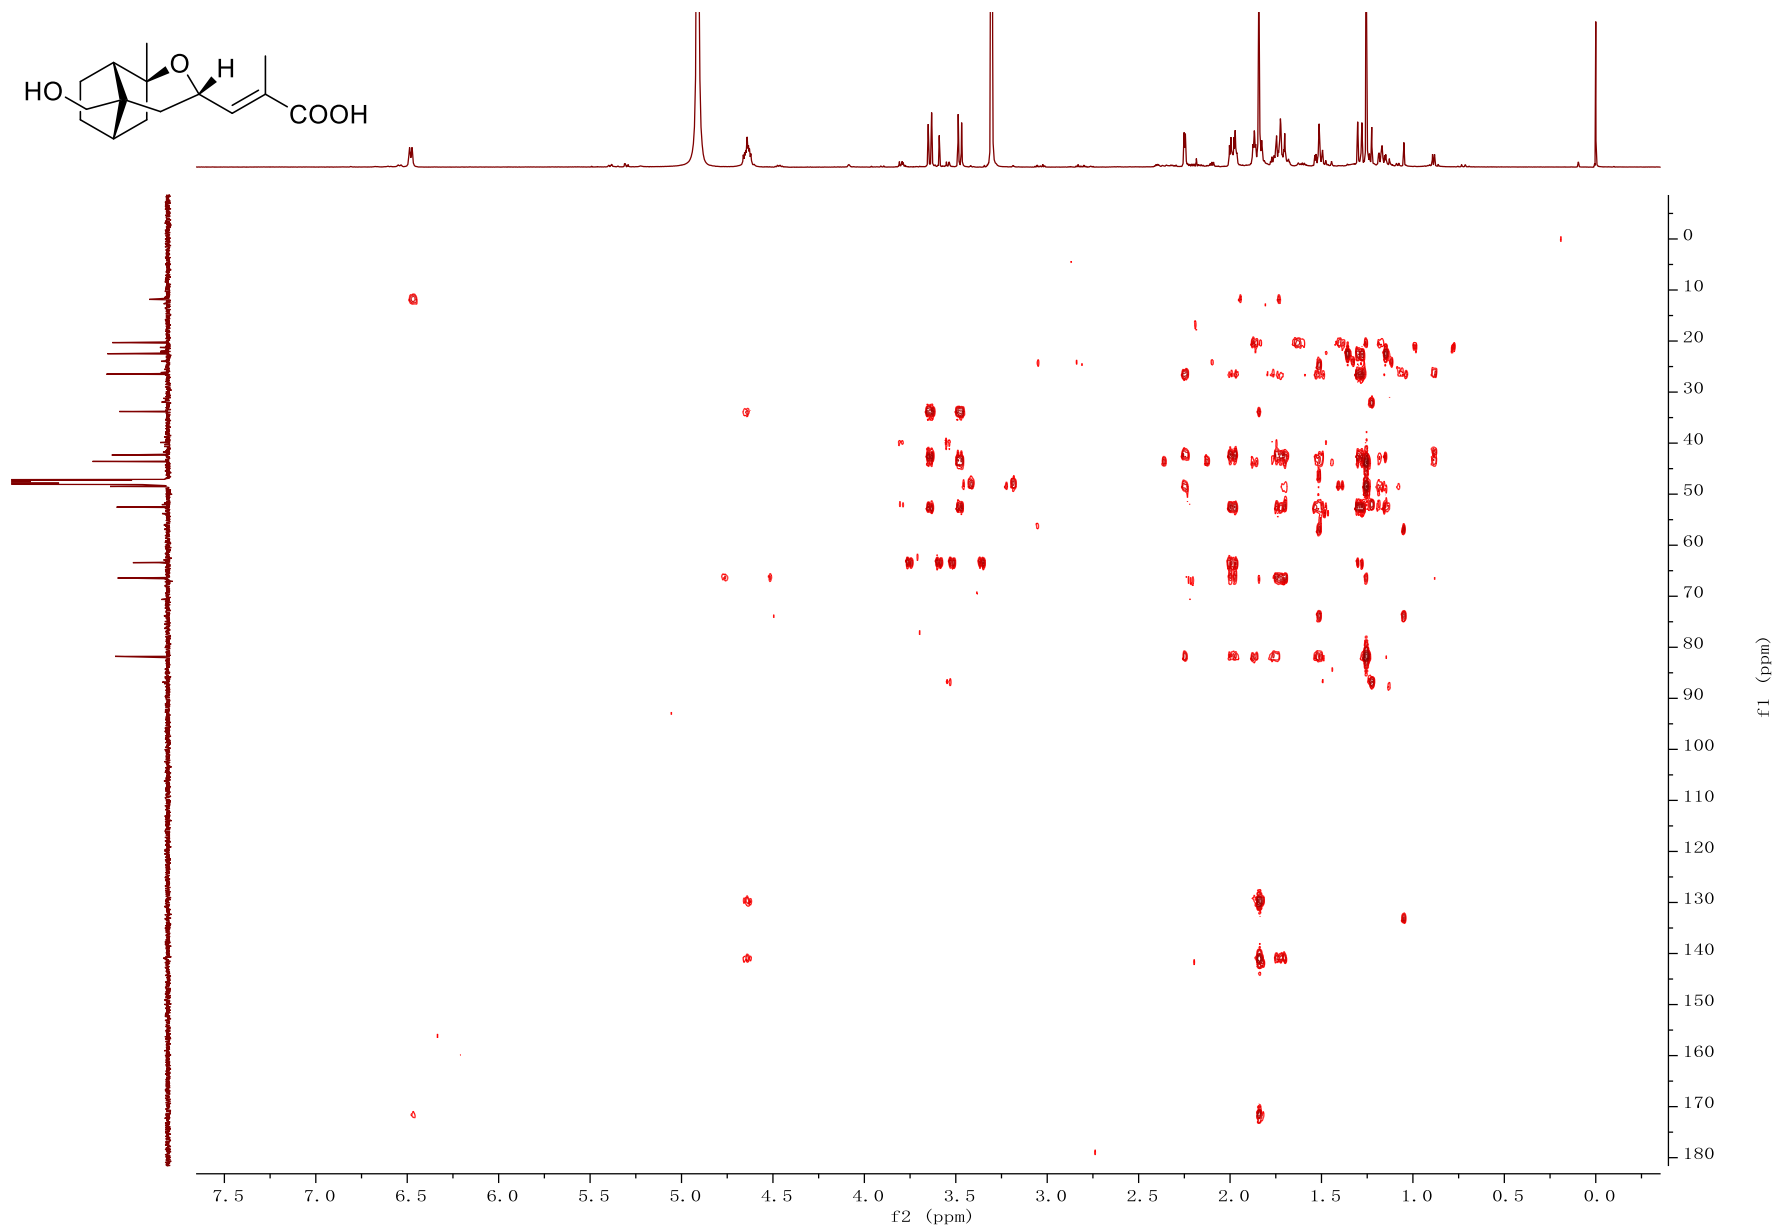

**Figure S35.**  $^1\text{H}$ - $^1\text{H}$  COSY of compound **2** in  $\text{CD}_3\text{OD}$

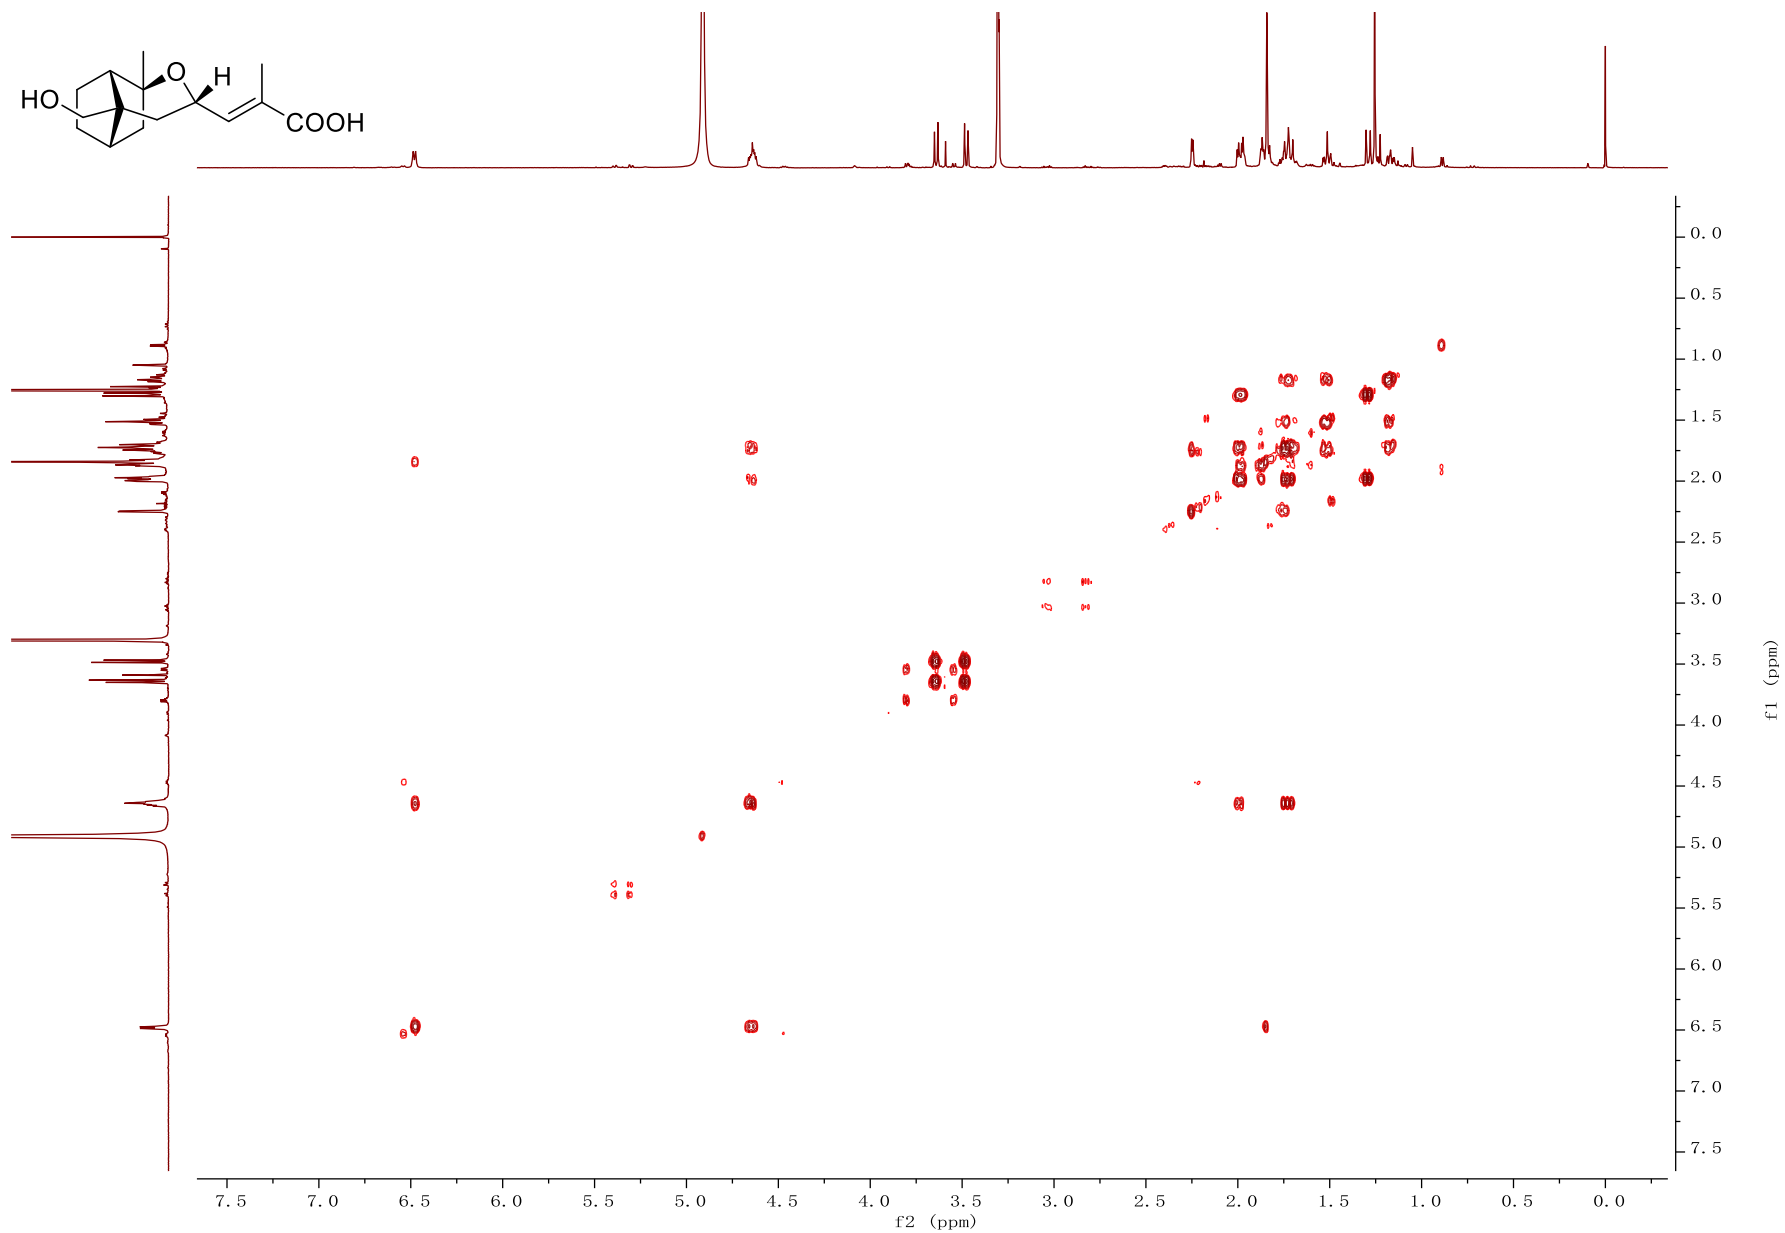

**Figure S36.** ROESY of compound **2** in CD<sub>3</sub>OD

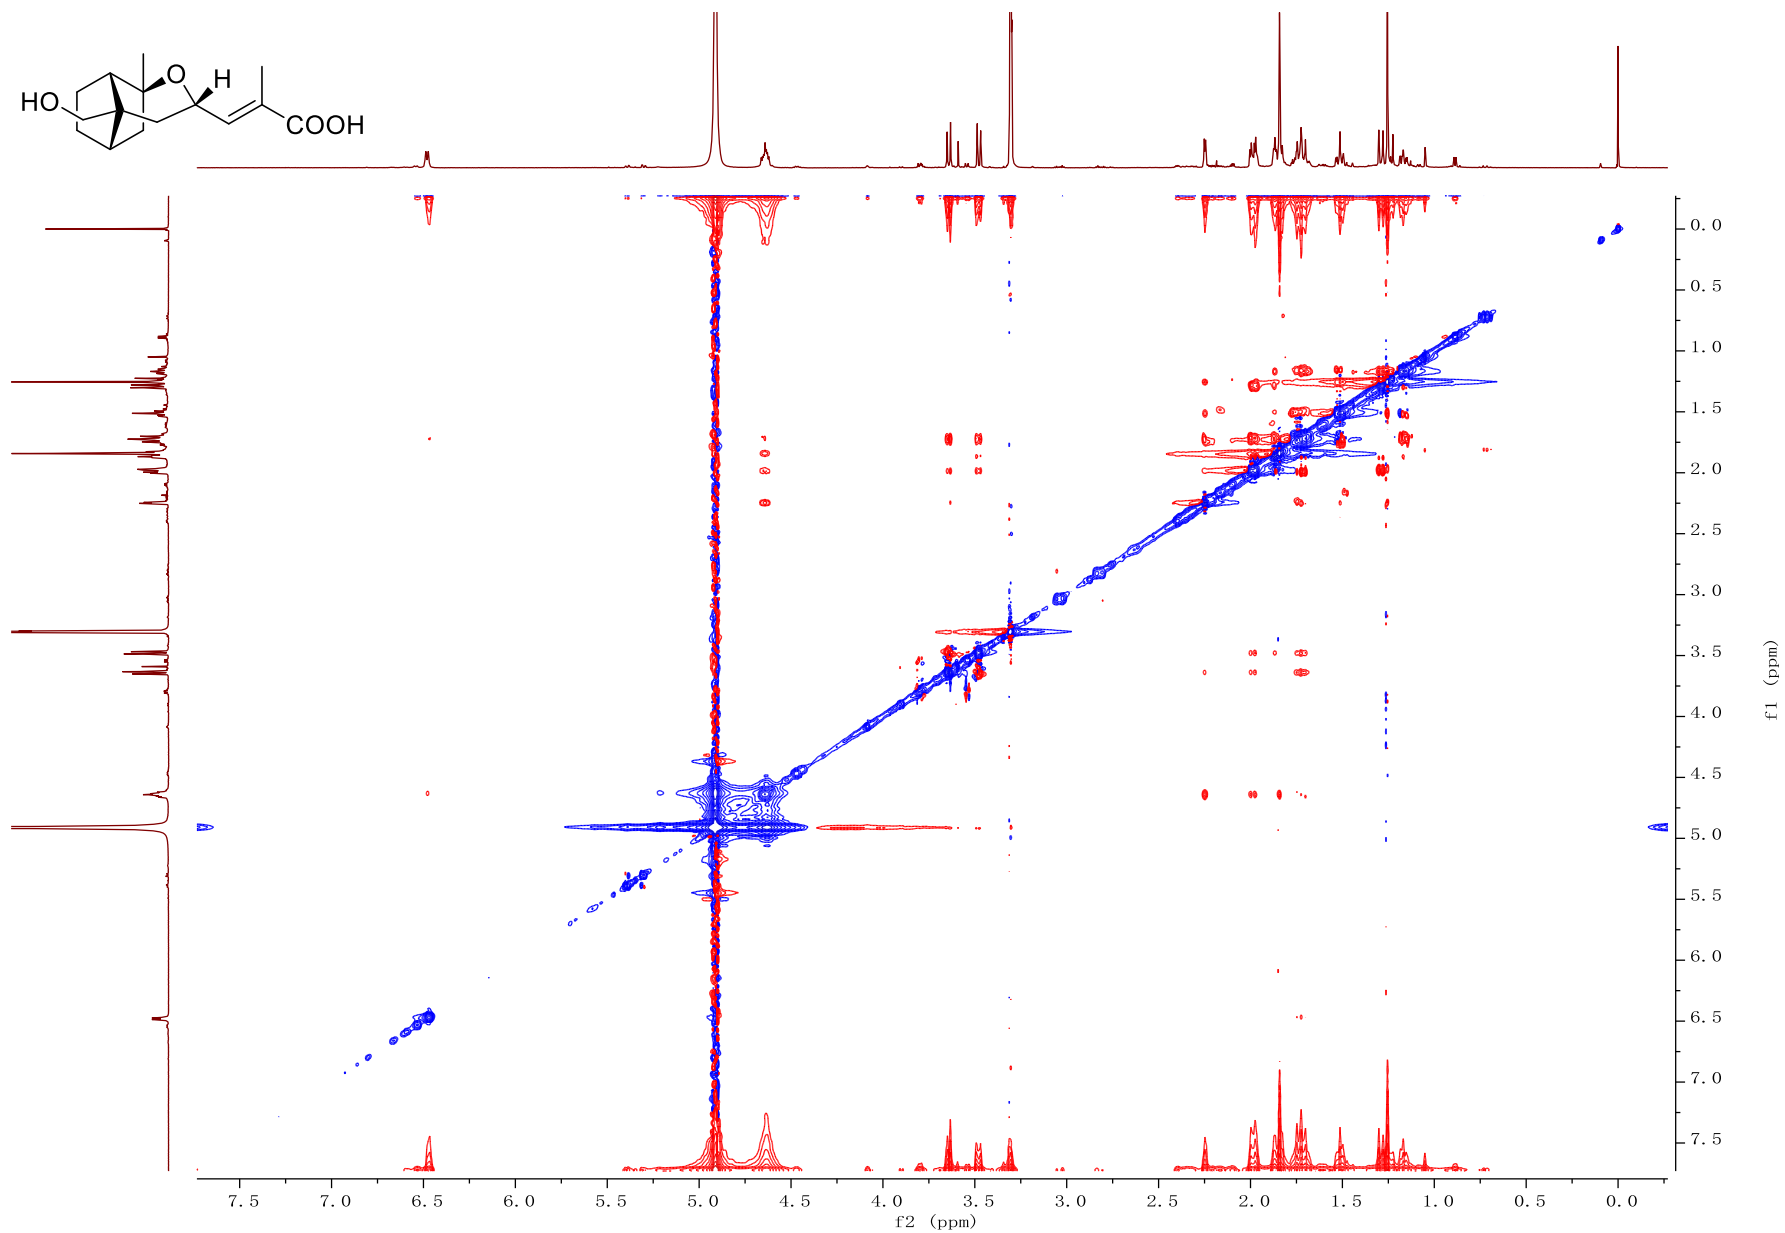



**Figure S37.** HR-ESIMS of compound **2**

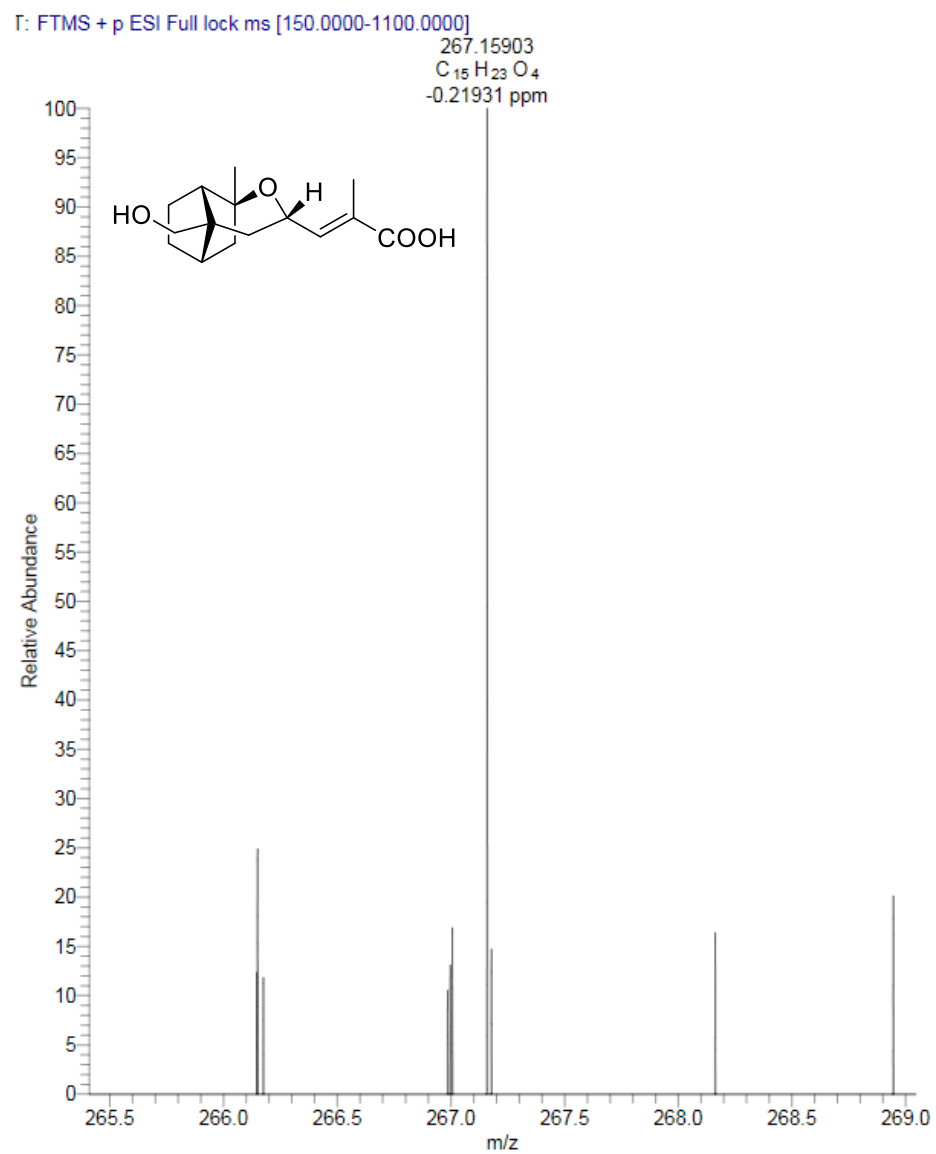

## Section S10. NMR and MS spectra for 3

Figure S38.  $^1\text{H}$  NMR of compound **3** in  $\text{CD}_3\text{OD}$

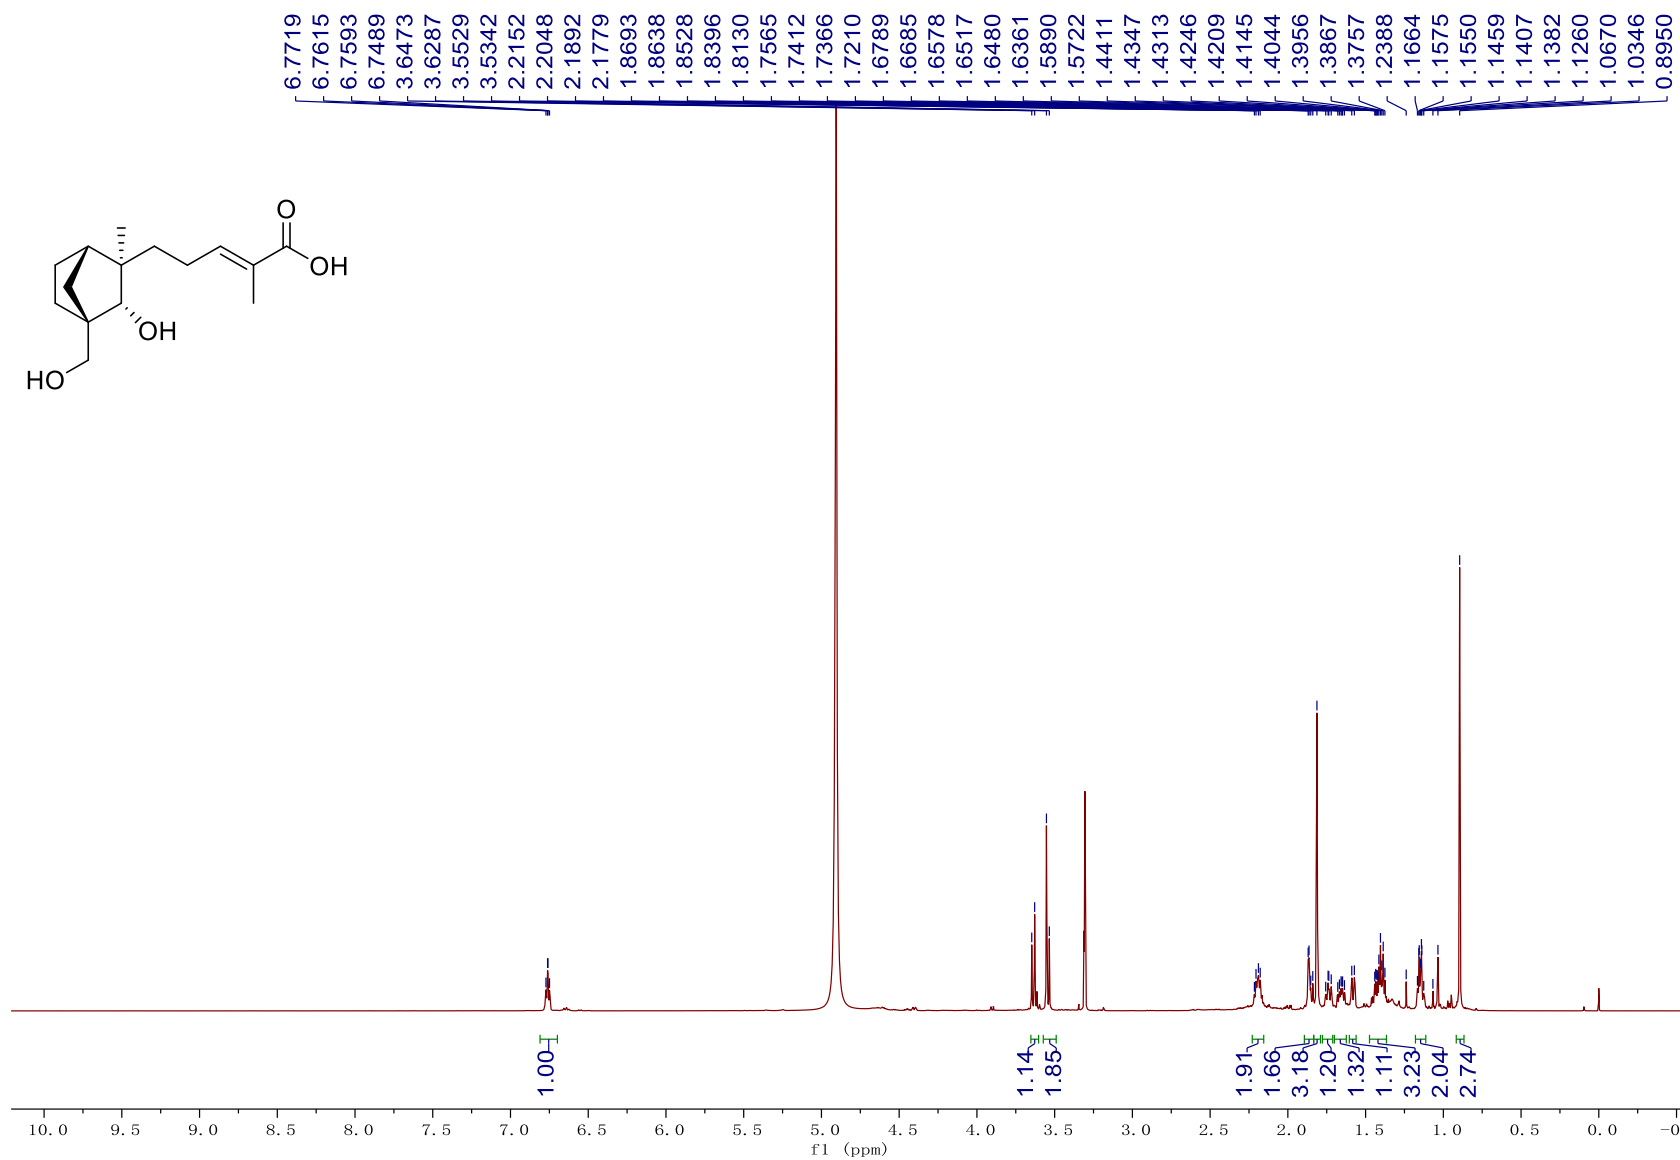

**Figure S39.**  $^{13}\text{C}$  NMR and DEPT of compound **3** in  $\text{CD}_3\text{OD}$

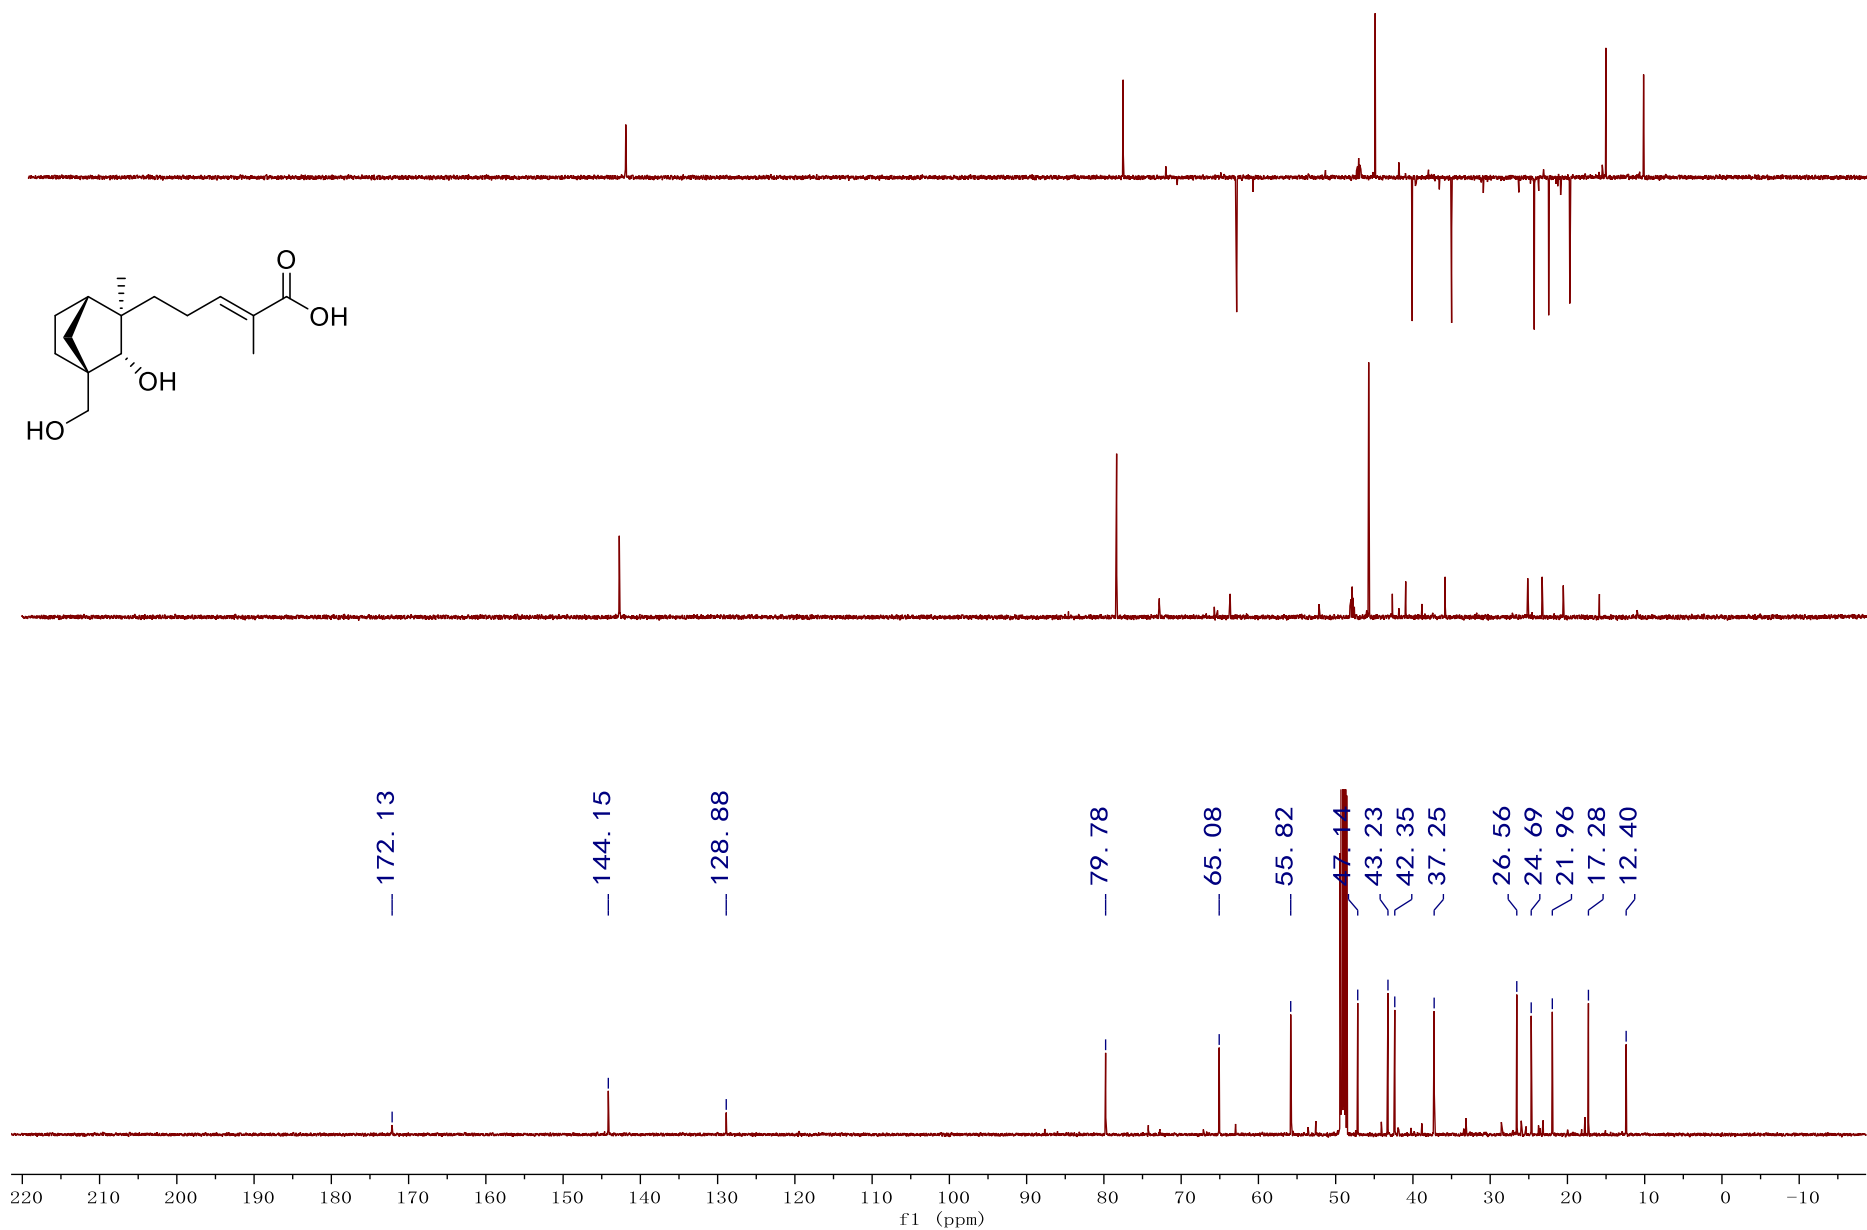

**Figure S40.** HSQC of compound **3** in CD<sub>3</sub>OD

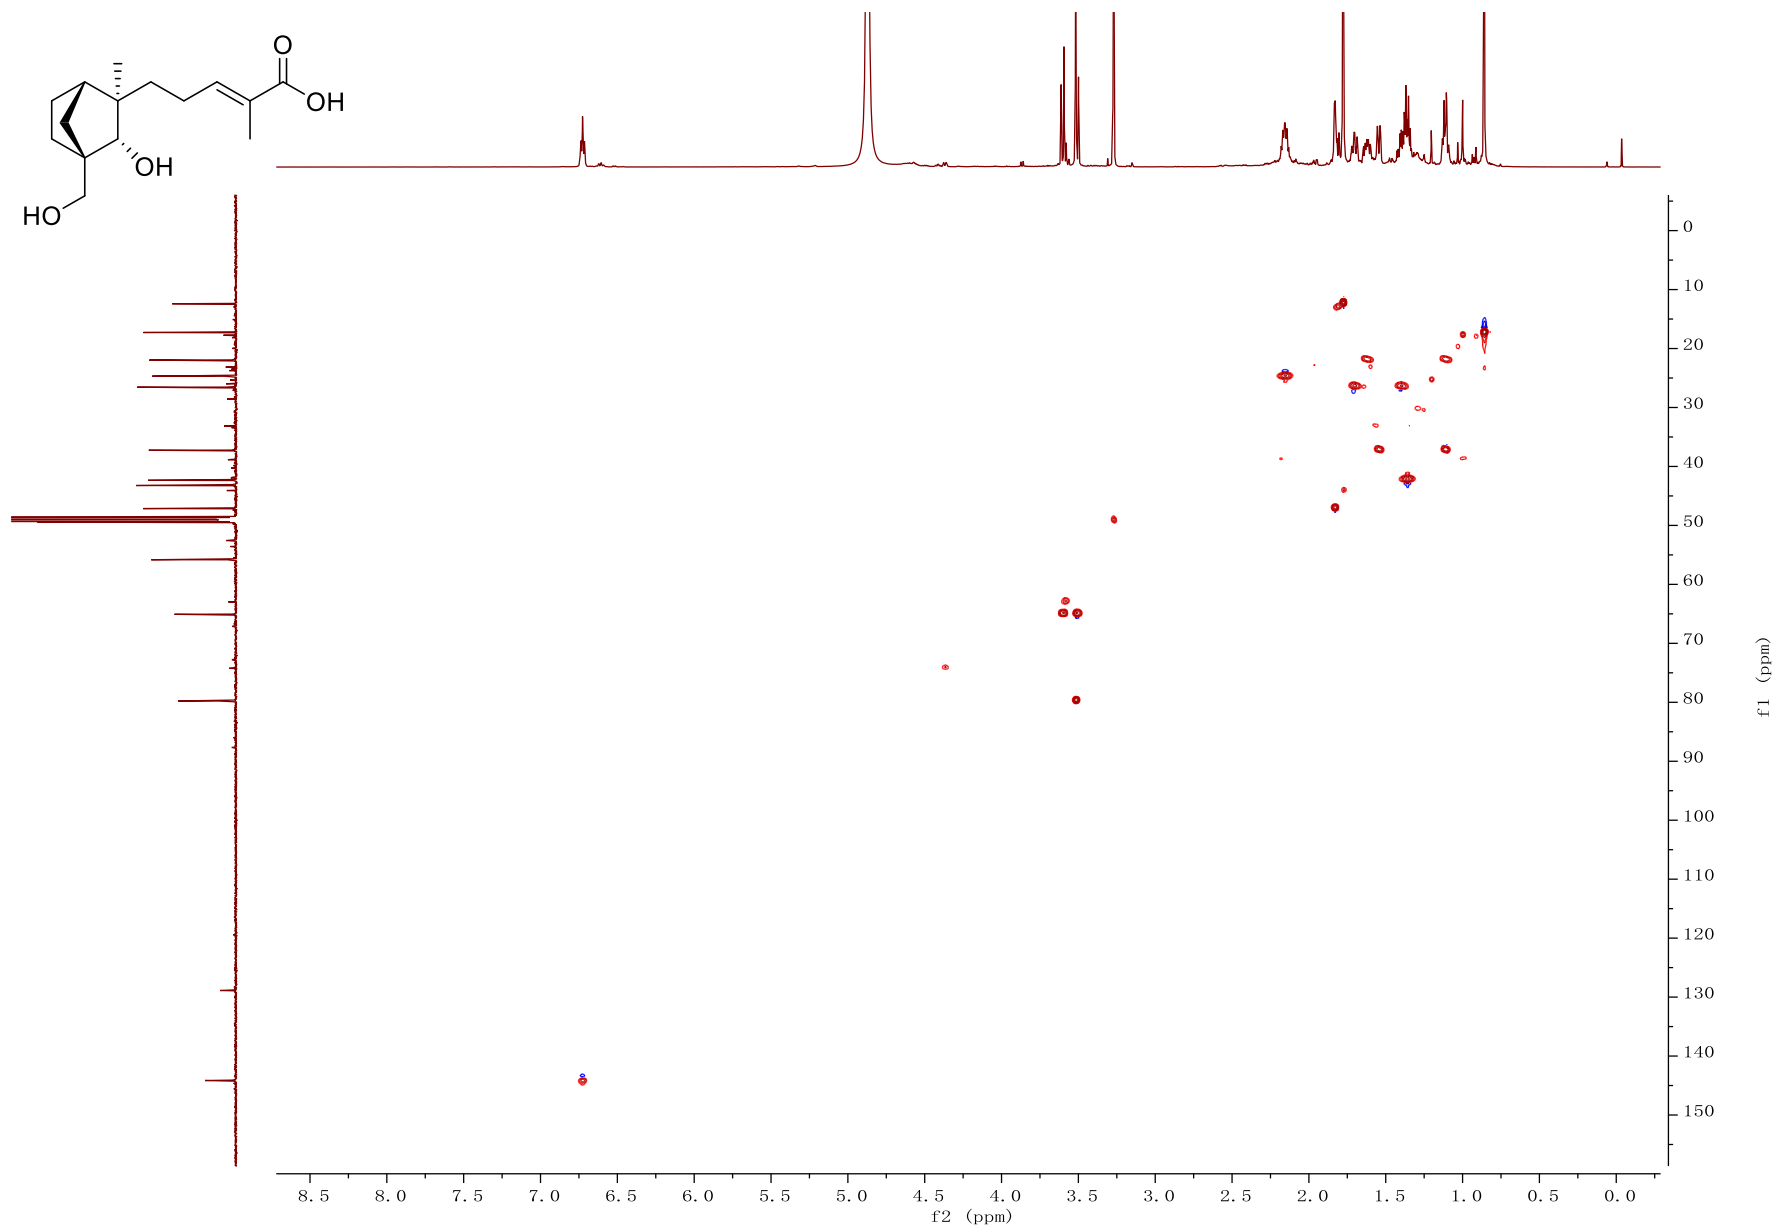

**Figure S41.** HMBC of compound **3** in CD<sub>3</sub>OD

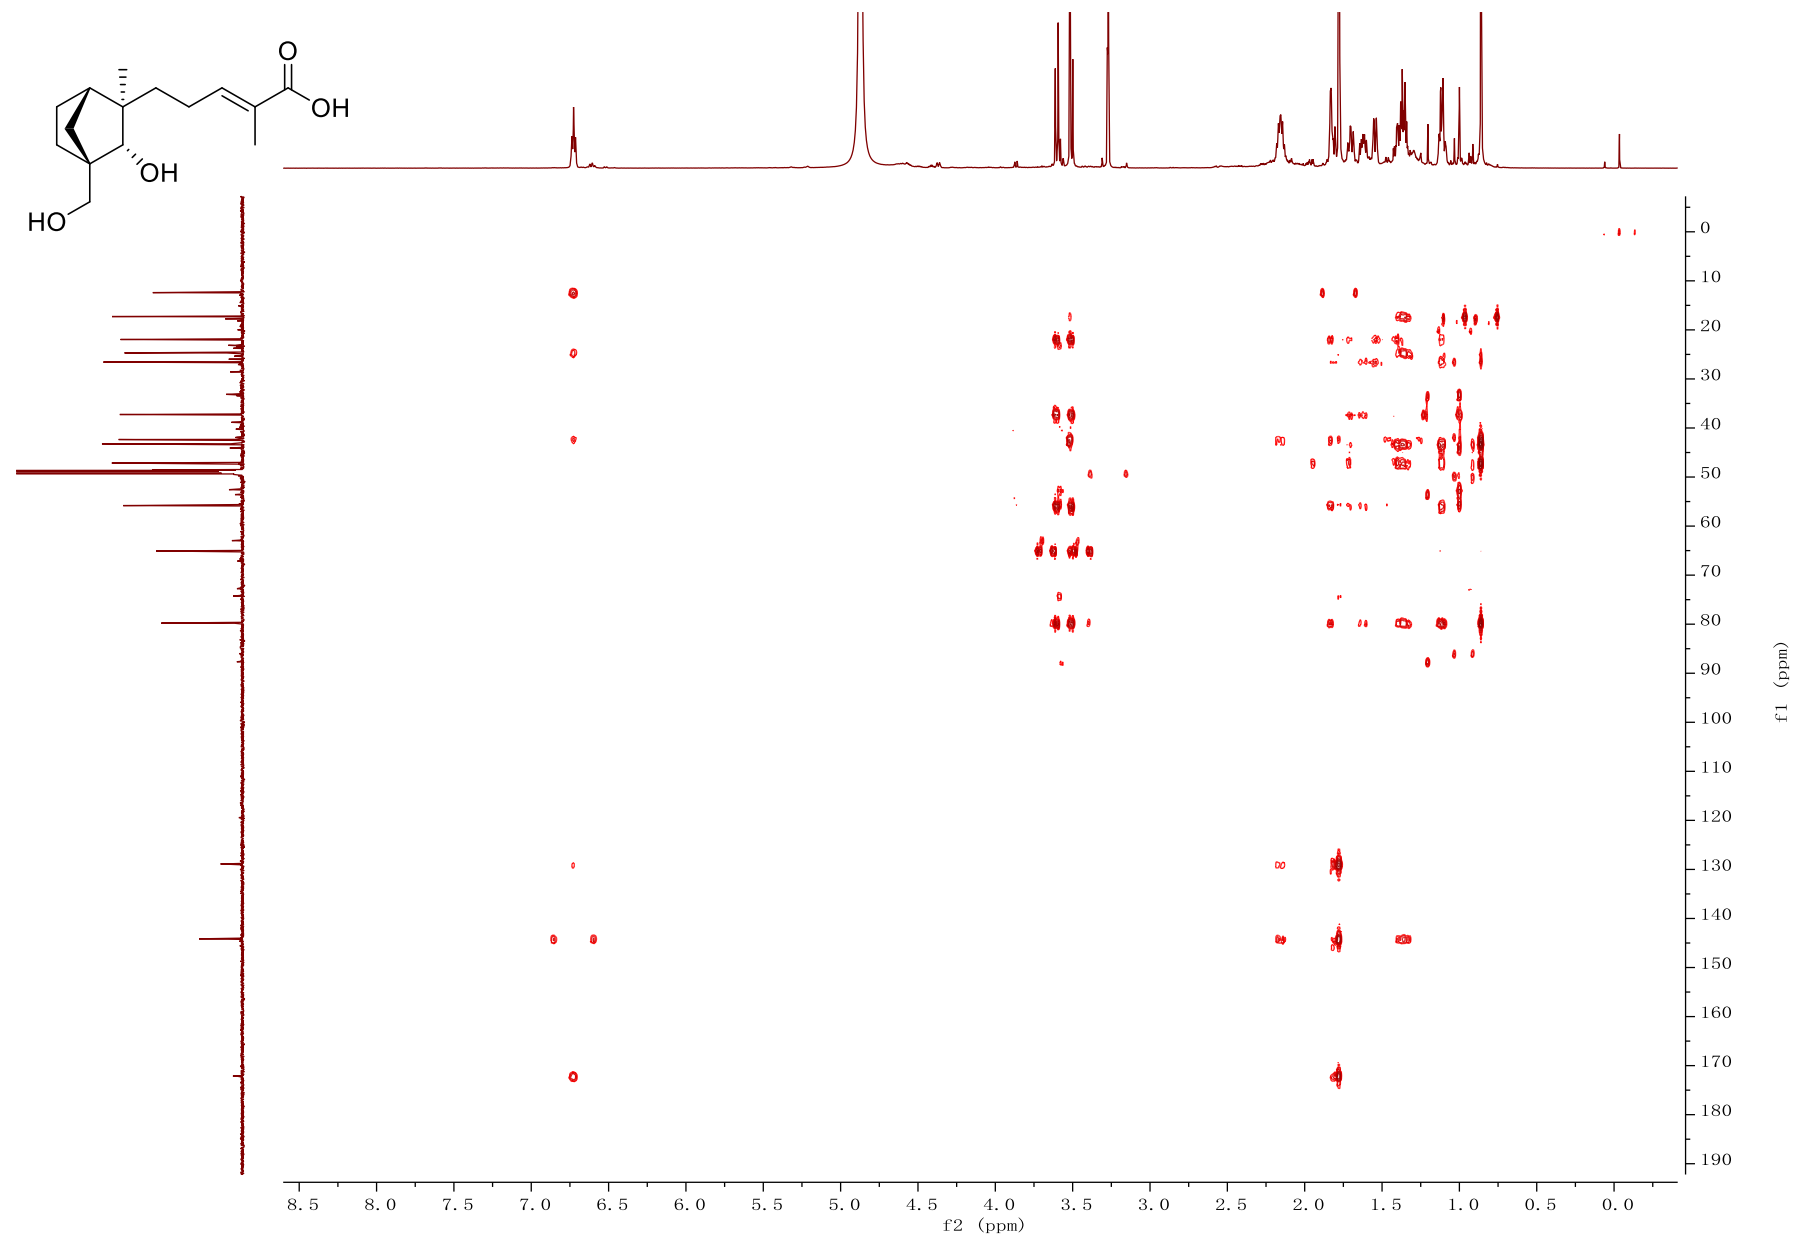

**Figure S42.**  $^1\text{H}$ - $^1\text{H}$  COSY of compound **3** in  $\text{CD}_3\text{OD}$

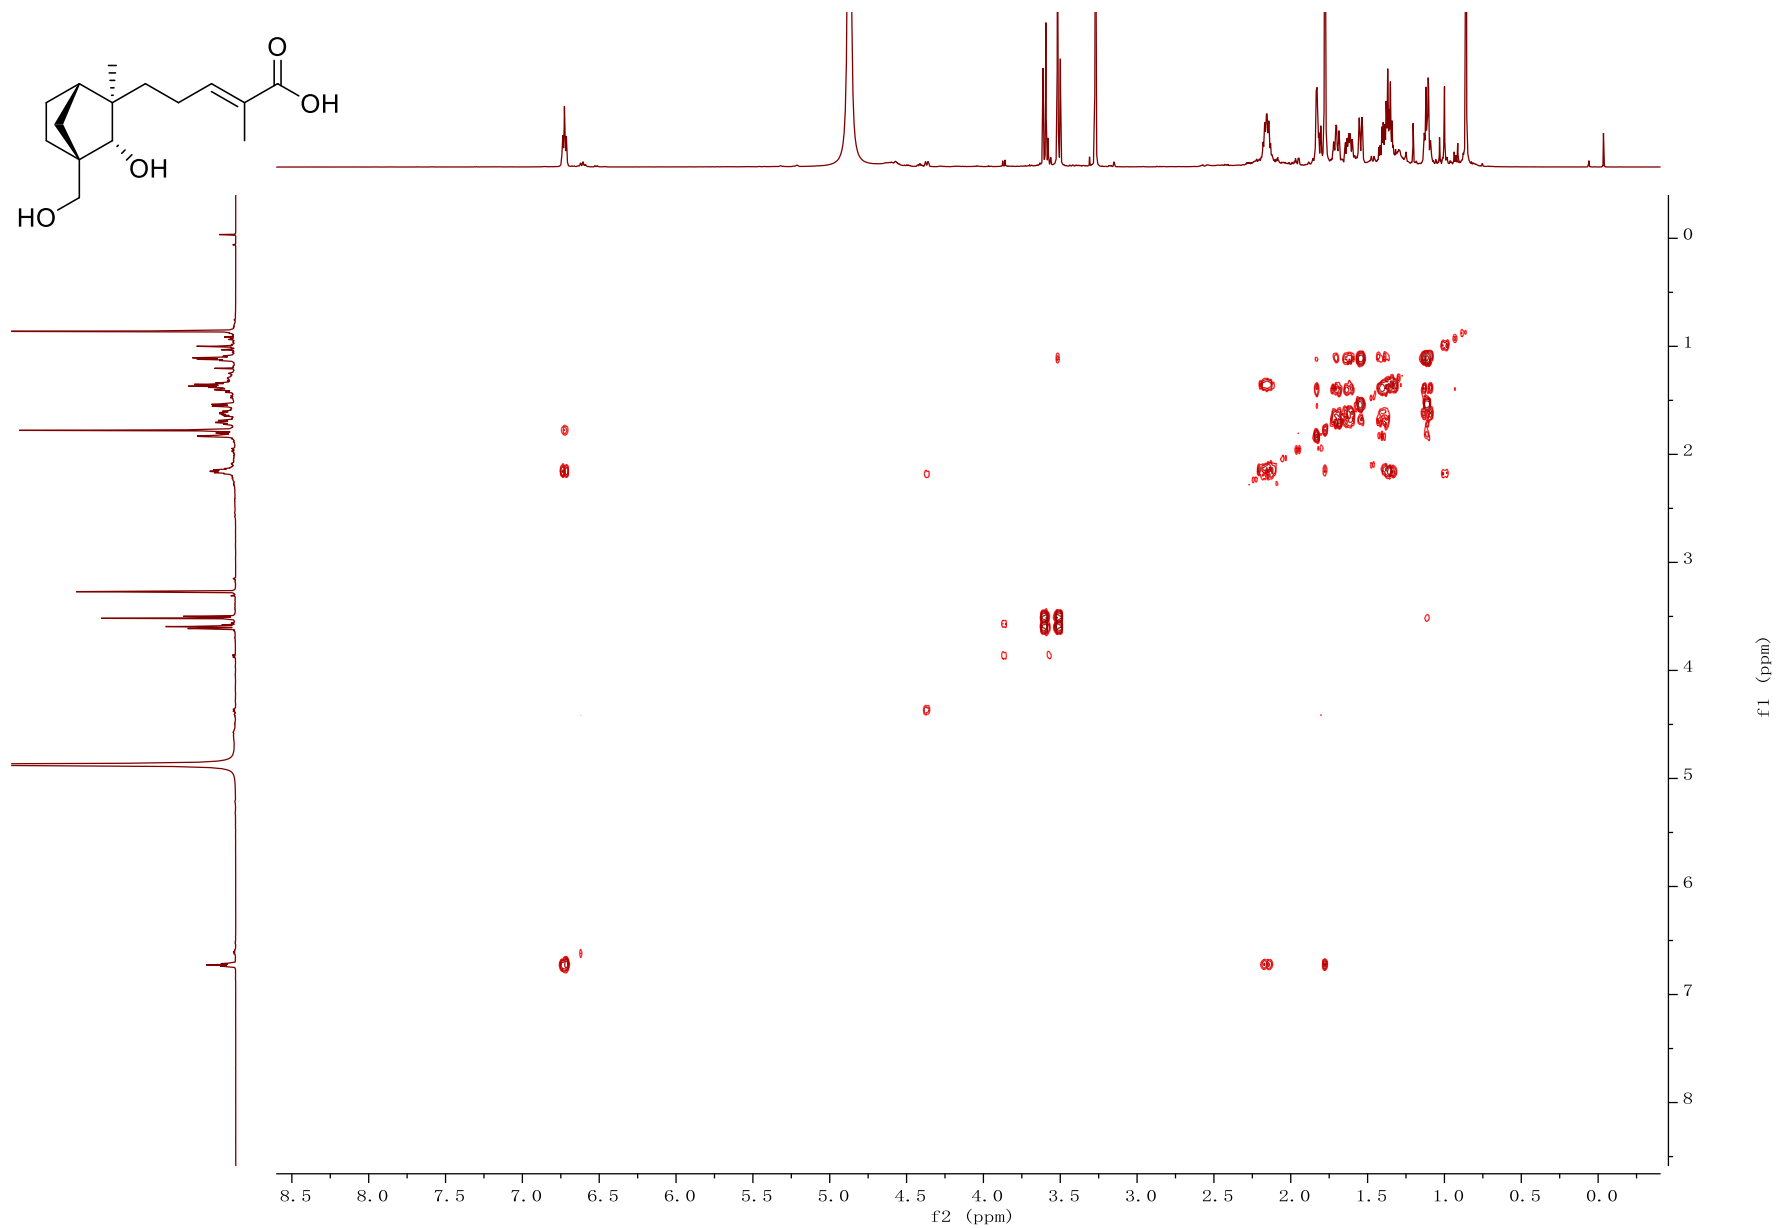

**Figure S43.** ROESY of compound **3** in CD<sub>3</sub>OD

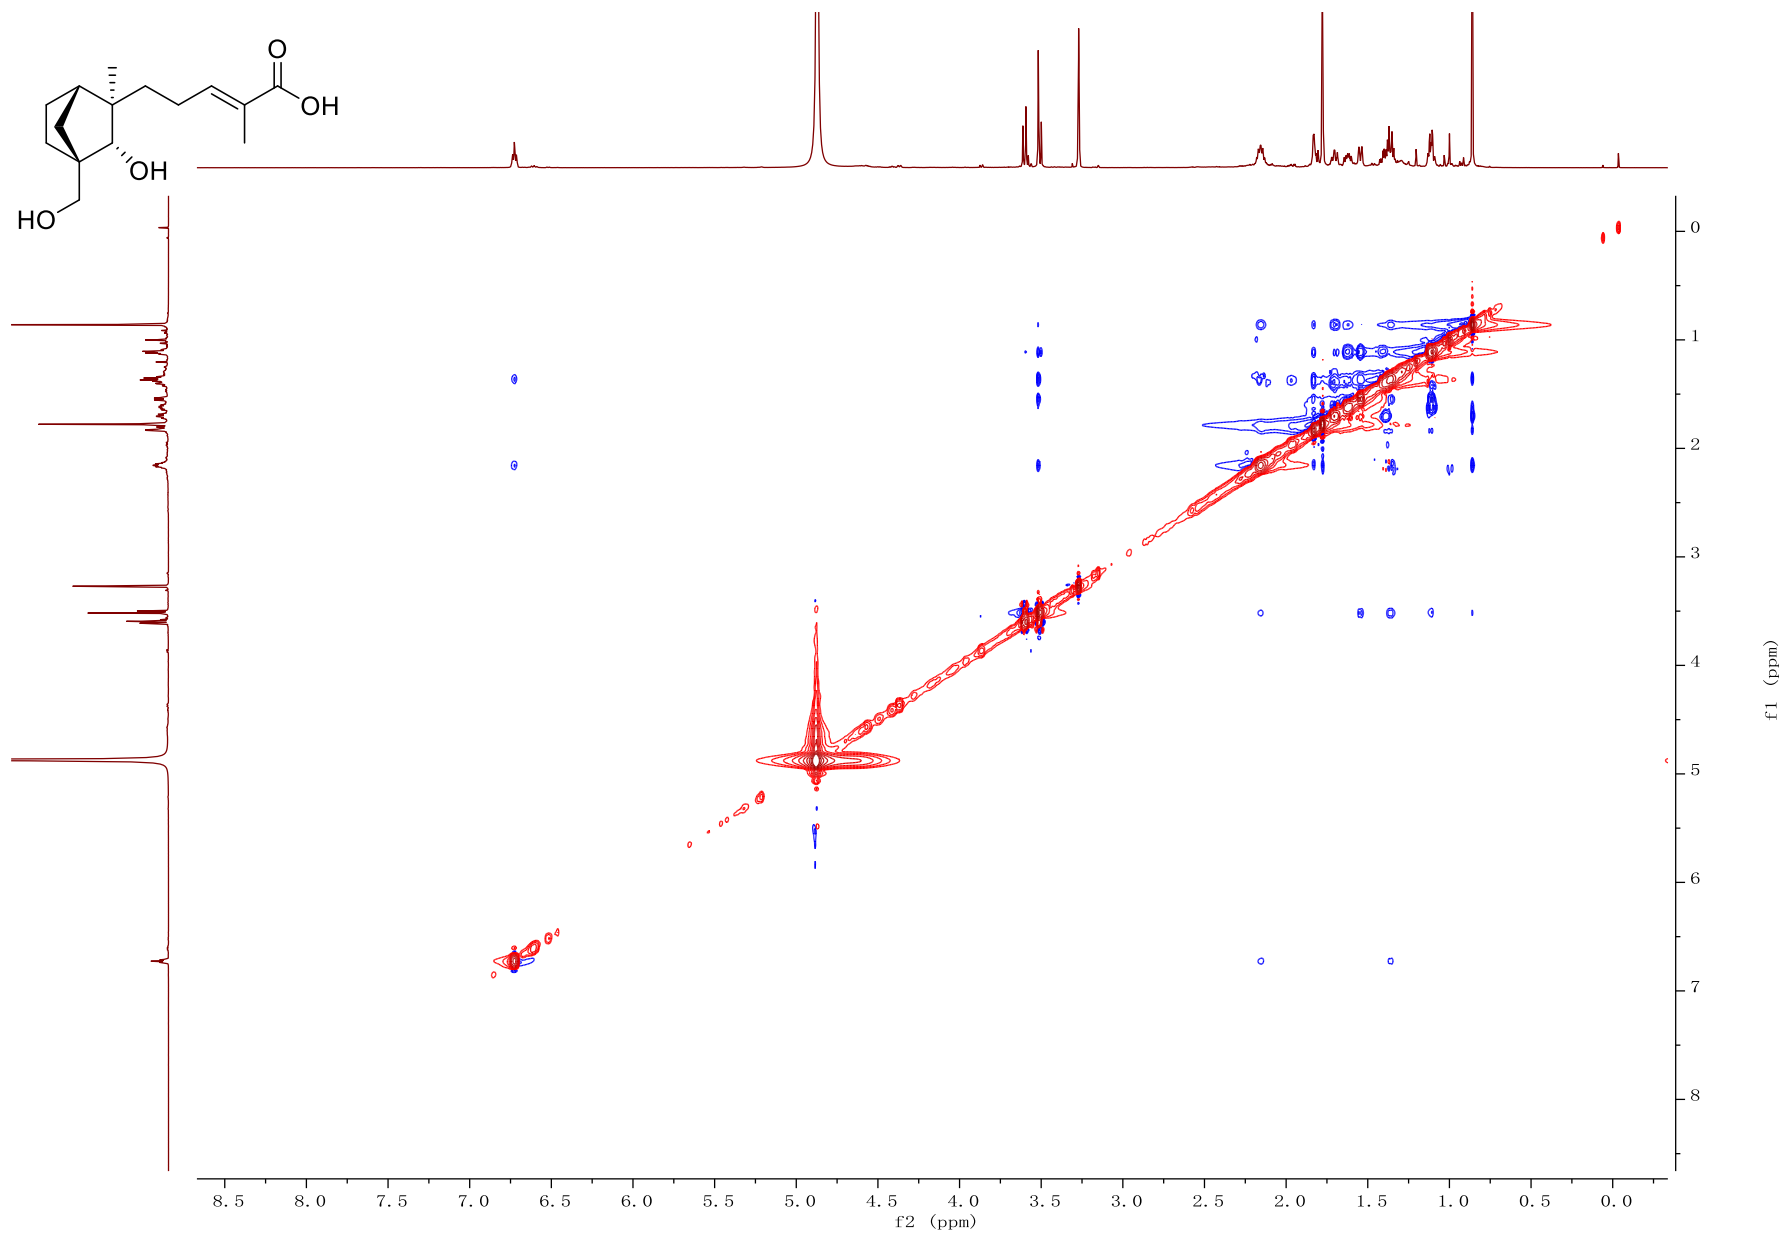

**Figure S44.** HR-ESIMS of compound **3**

FTMS + p ESI Full lock ms [100.0000-600.0000]

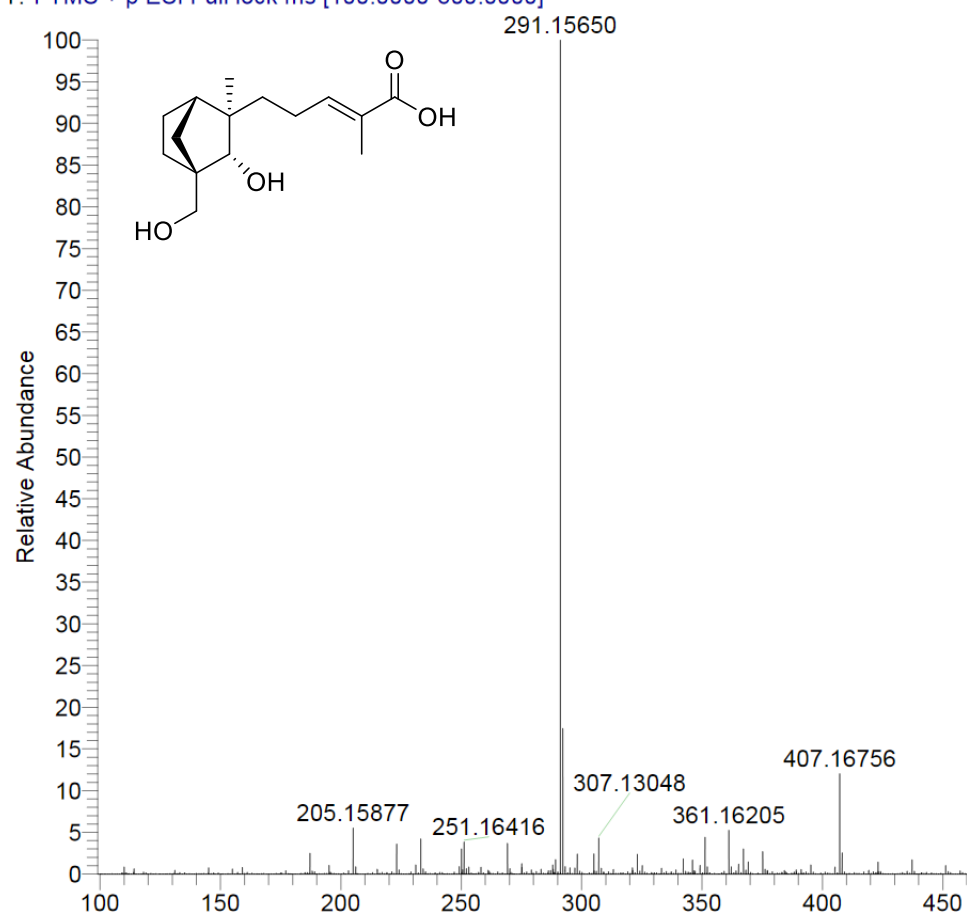



## Section S11. NMR and MS spectra for 4

**Figure S45.**  $^1\text{H}$  NMR of compound **4** in  $\text{CD}_3\text{OD}$

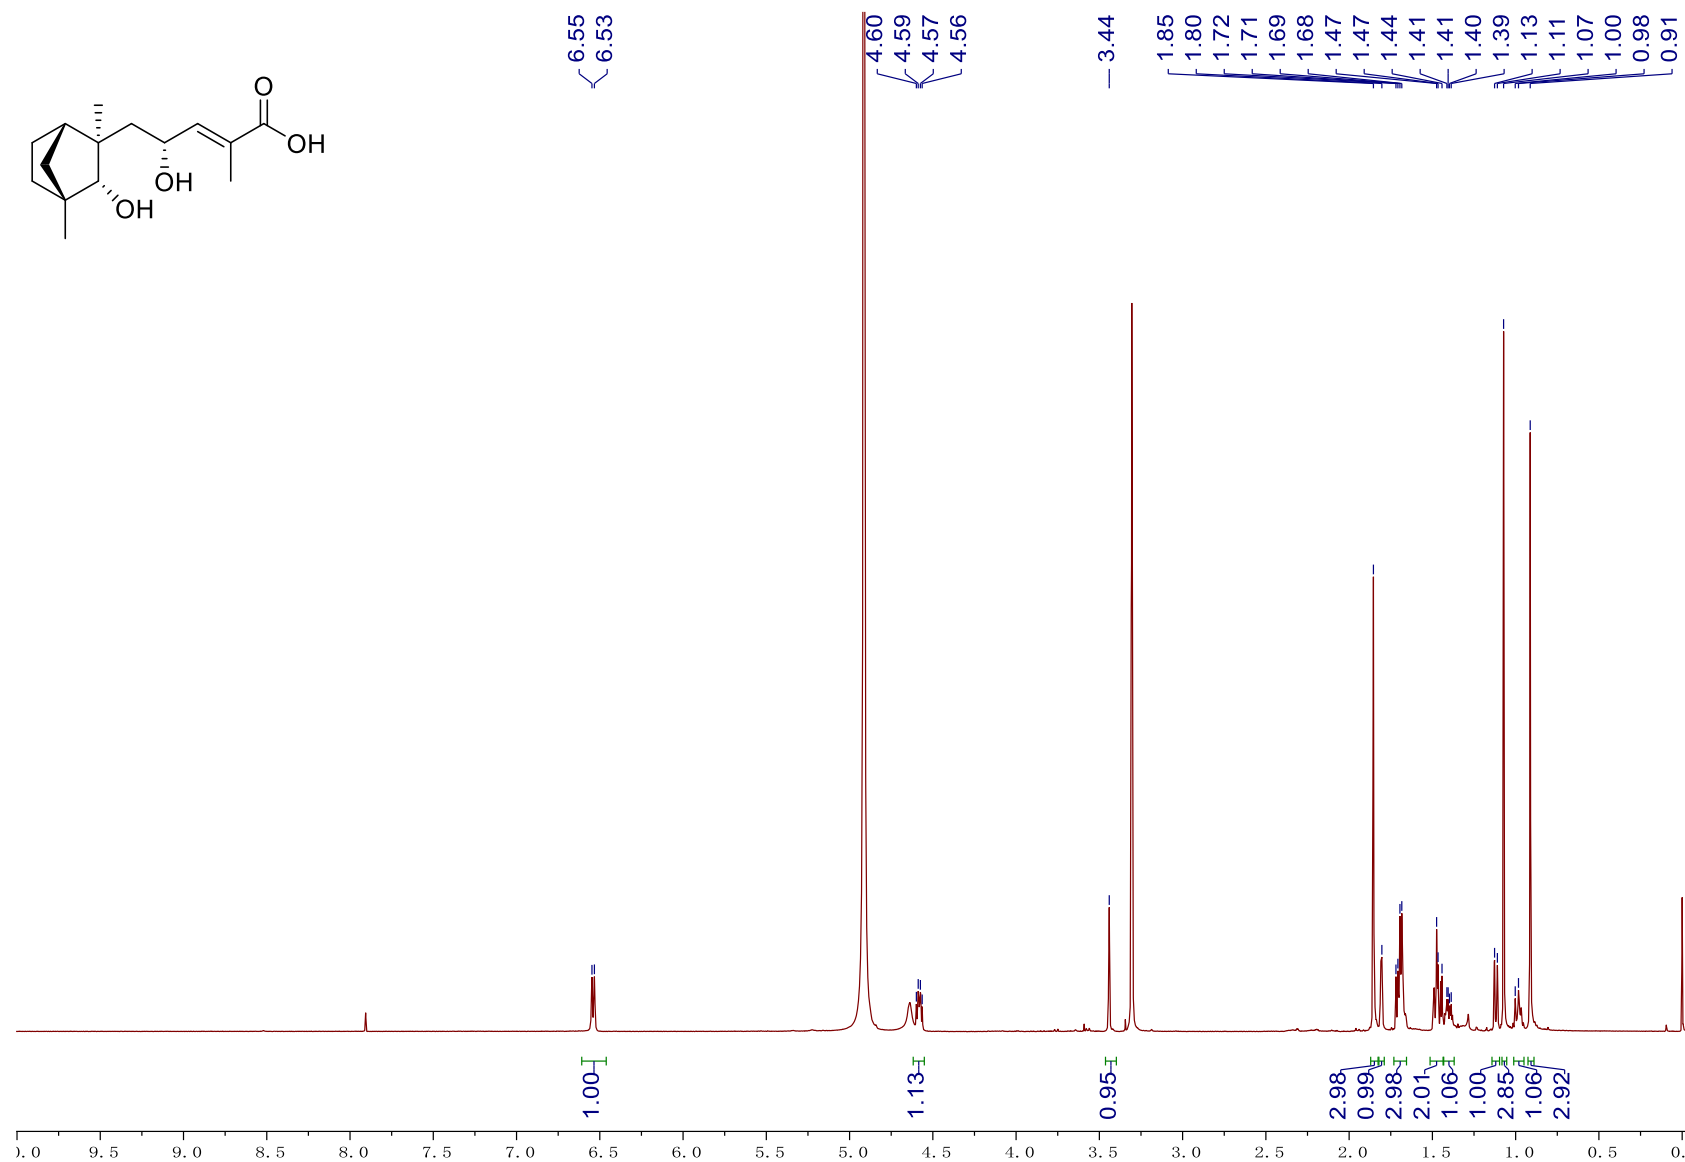

**Figure S46.**  $^{13}\text{C}$  NMR and DEPT of compound **4** in  $\text{CD}_3\text{OD}$

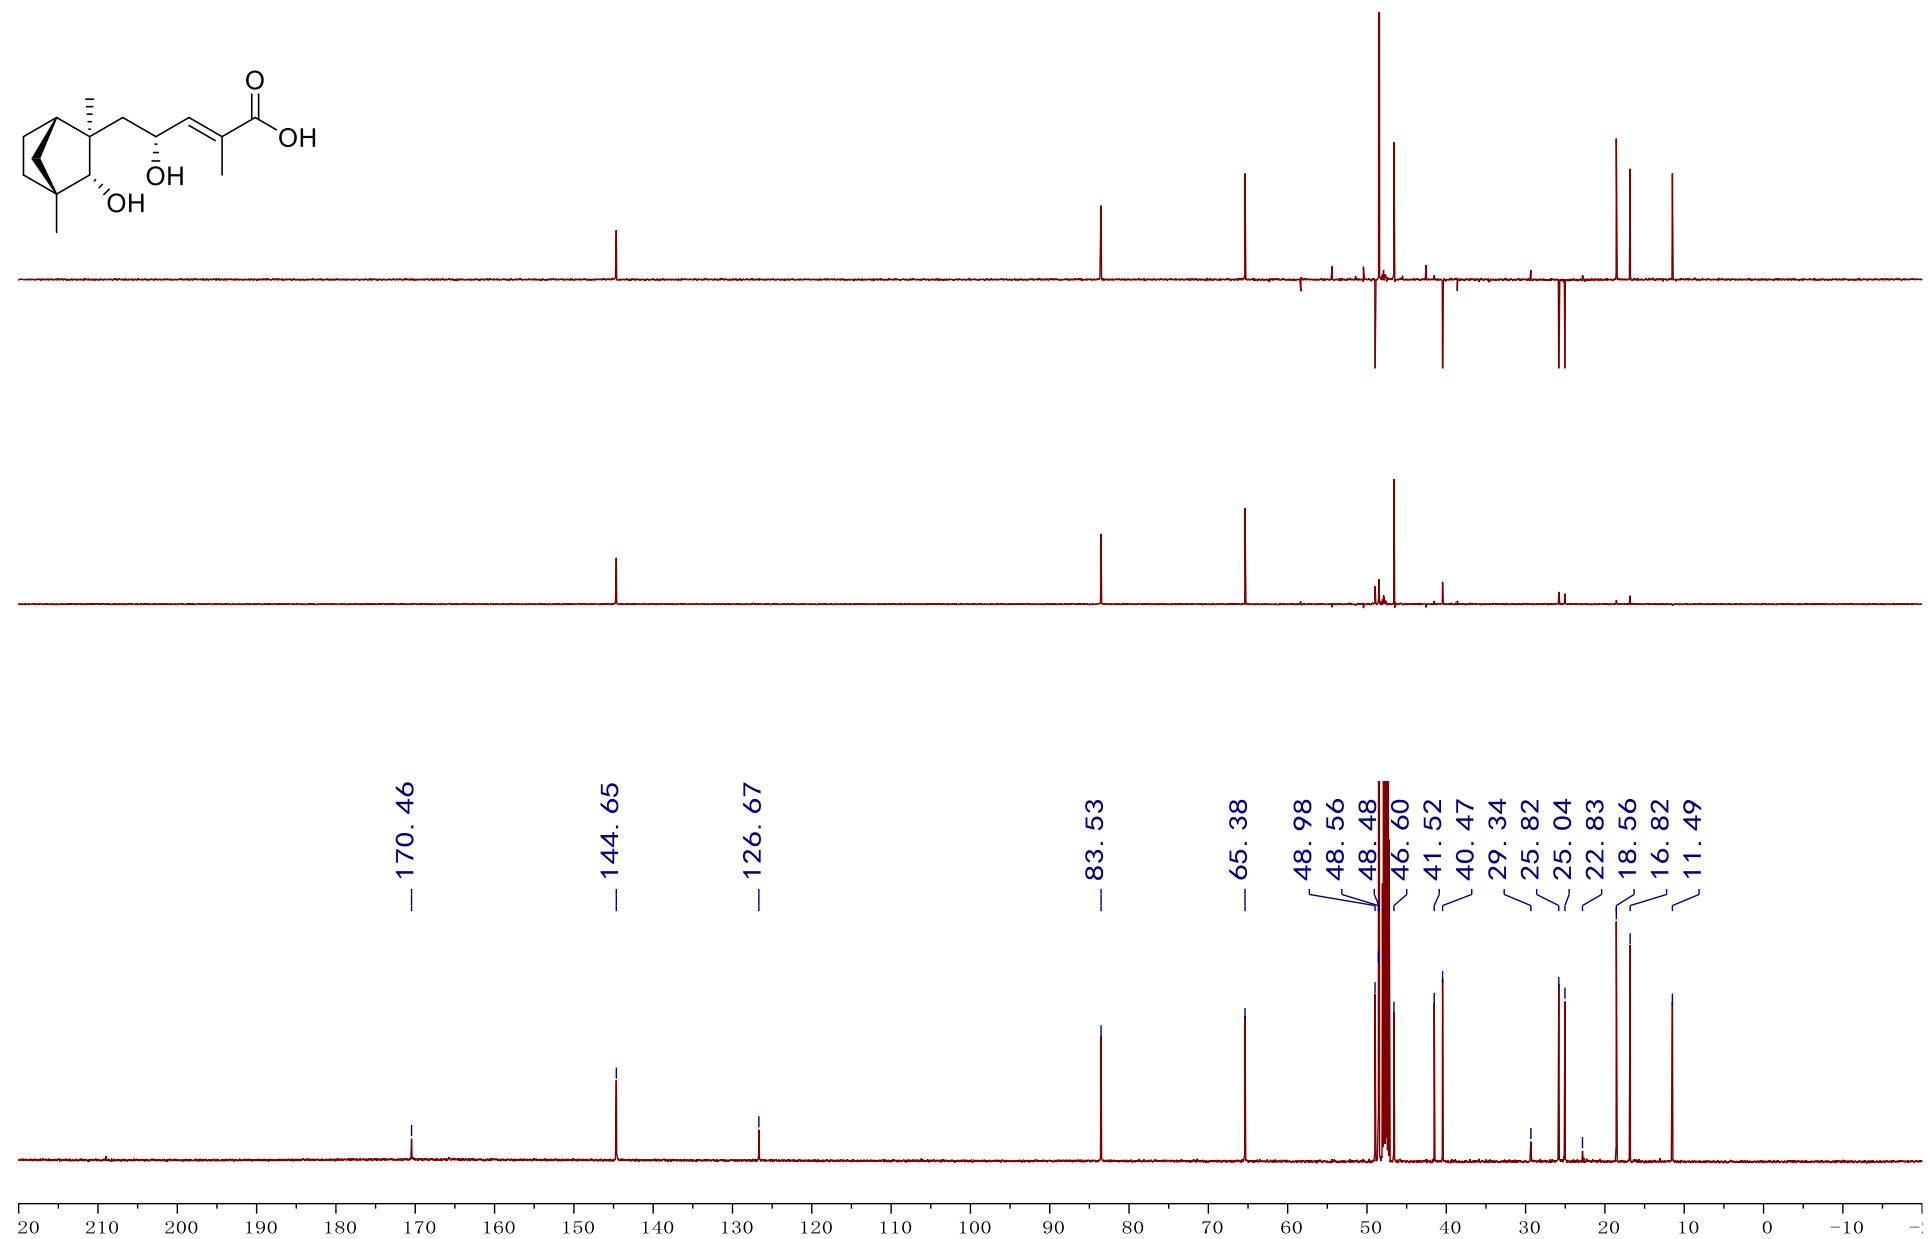

**Figure S47.** HSQC of compound **4** in CD<sub>3</sub>OD

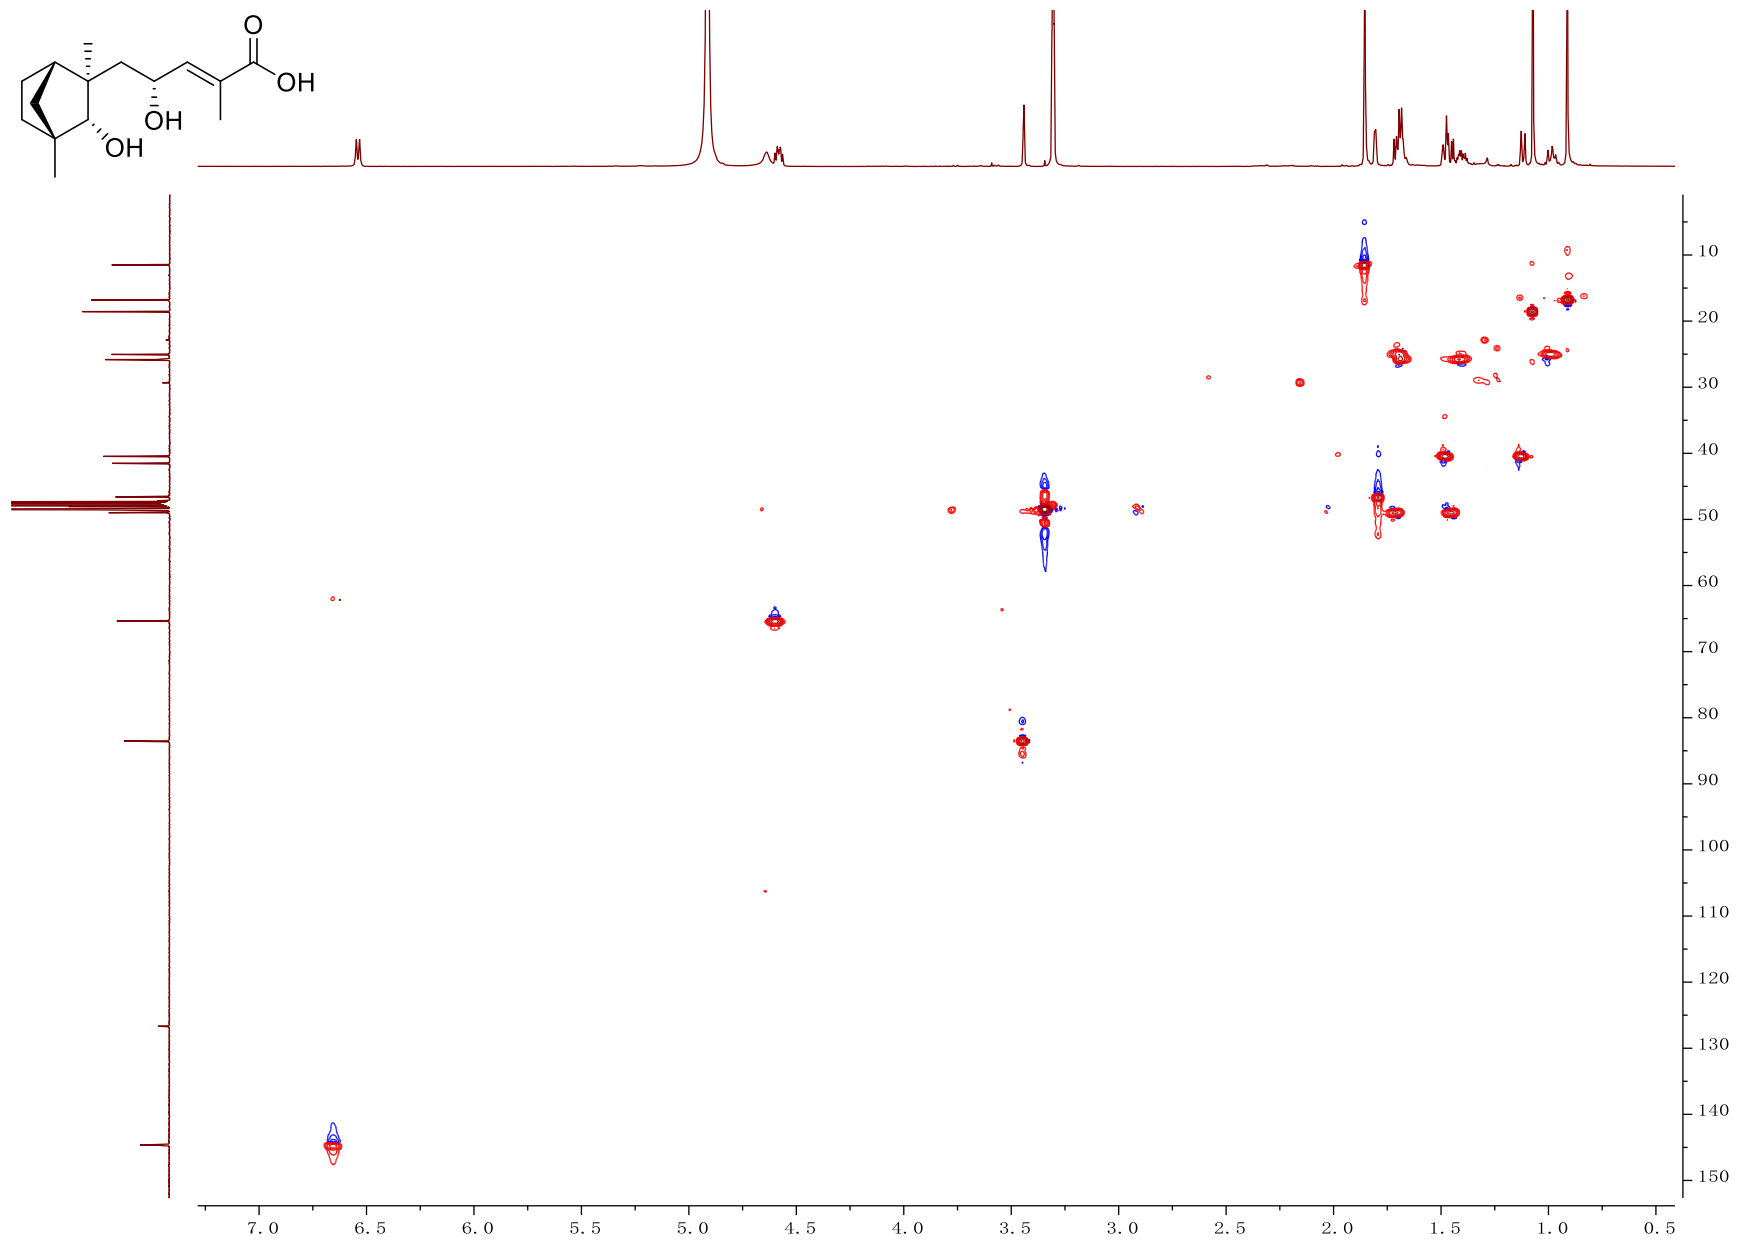

**Figure S48.** HMBC of compound **4** in CD<sub>3</sub>OD

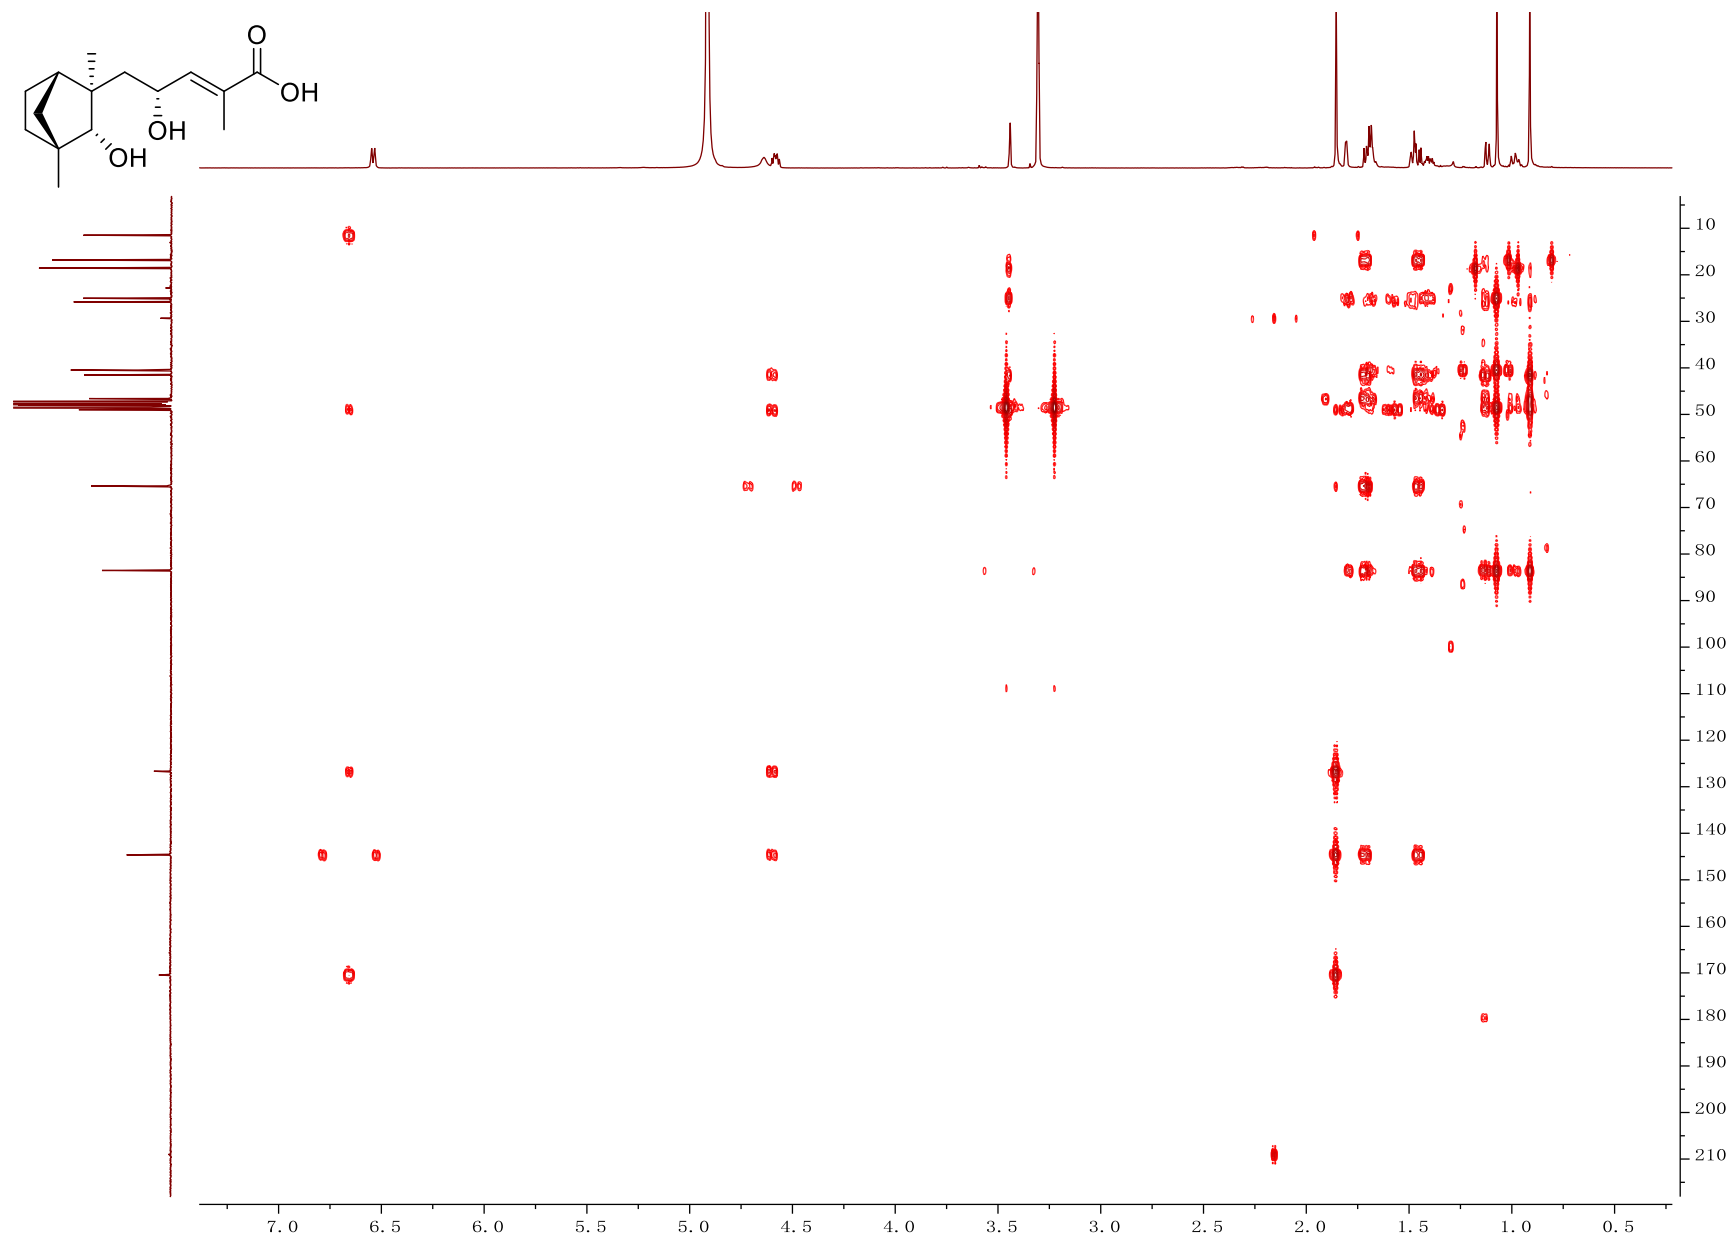

**Figure S49.**  $^1\text{H}$ - $^1\text{H}$  COSY of compound **4** in  $\text{CD}_3\text{OD}$

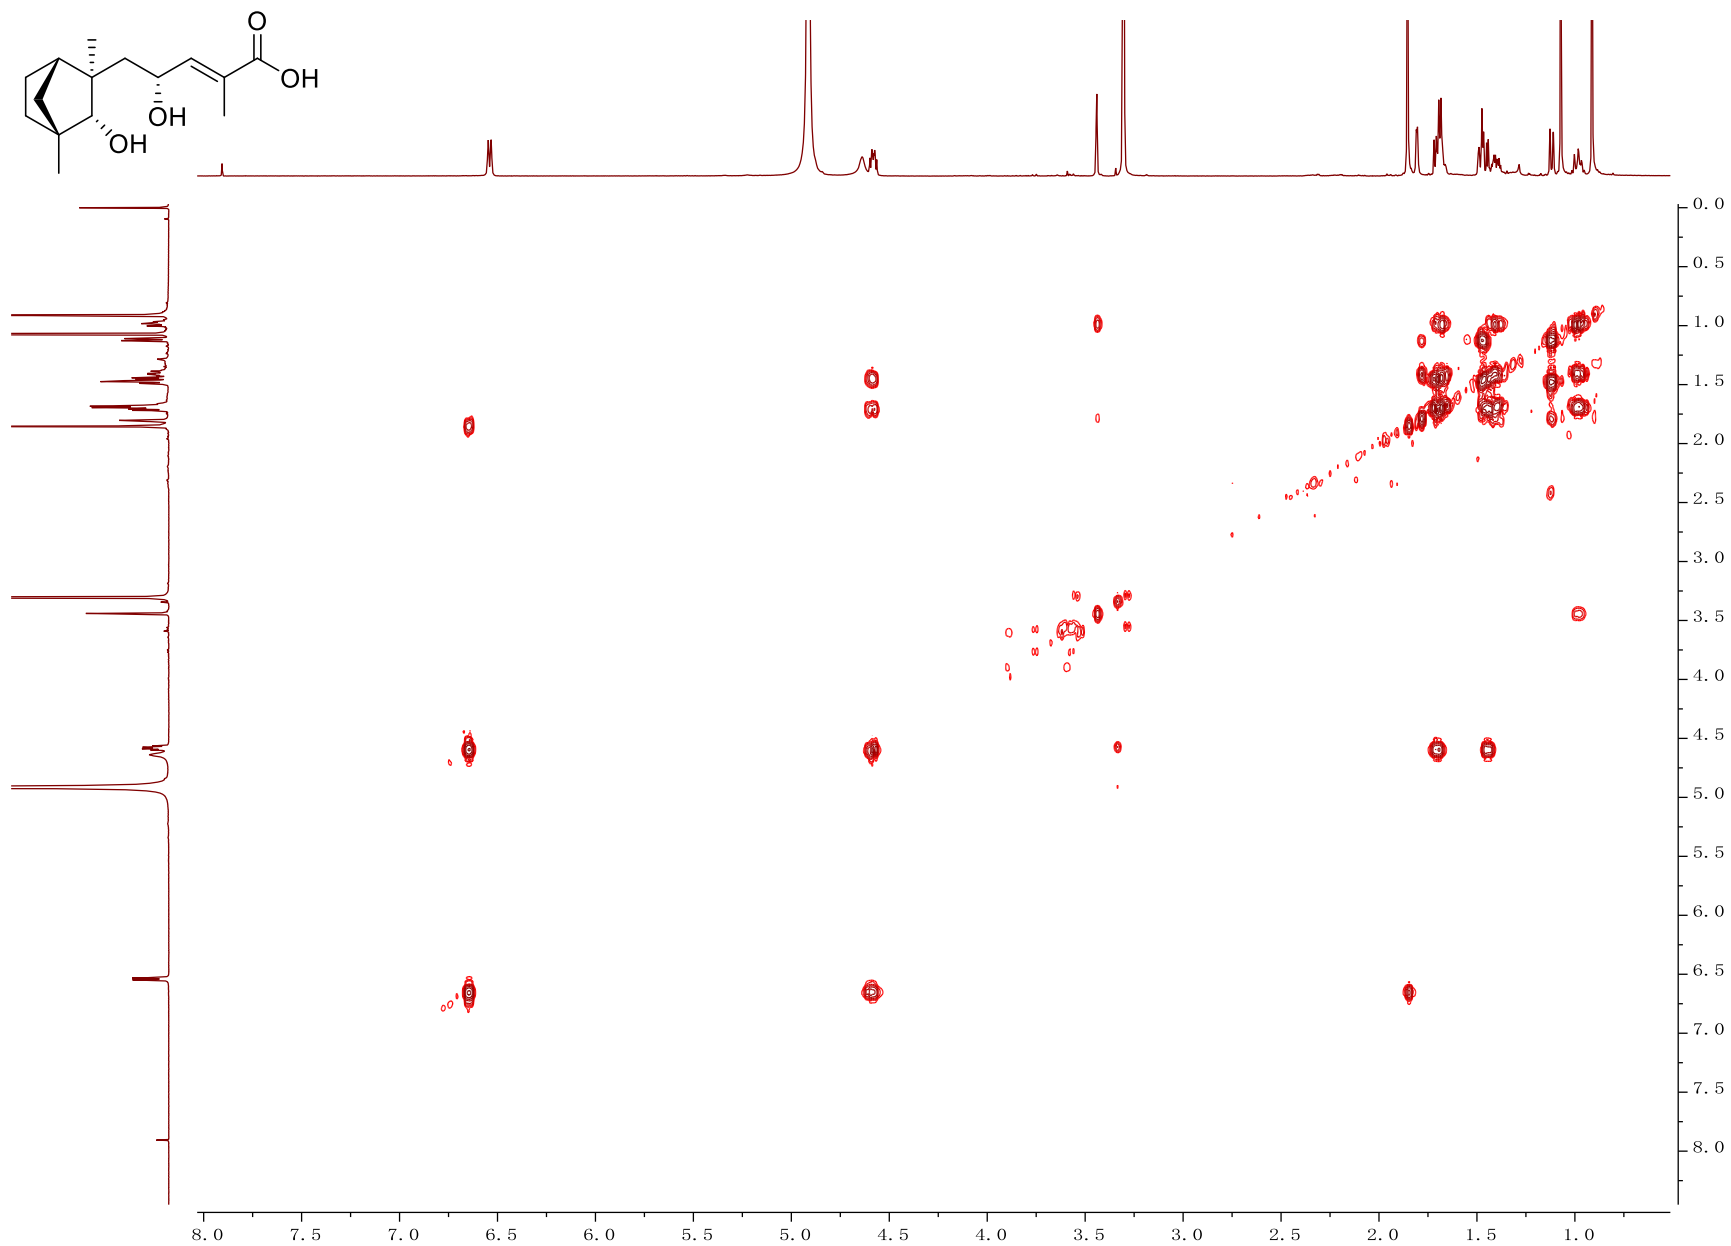

**Figure S50.** ROESY of compound **4** in CD<sub>3</sub>OD

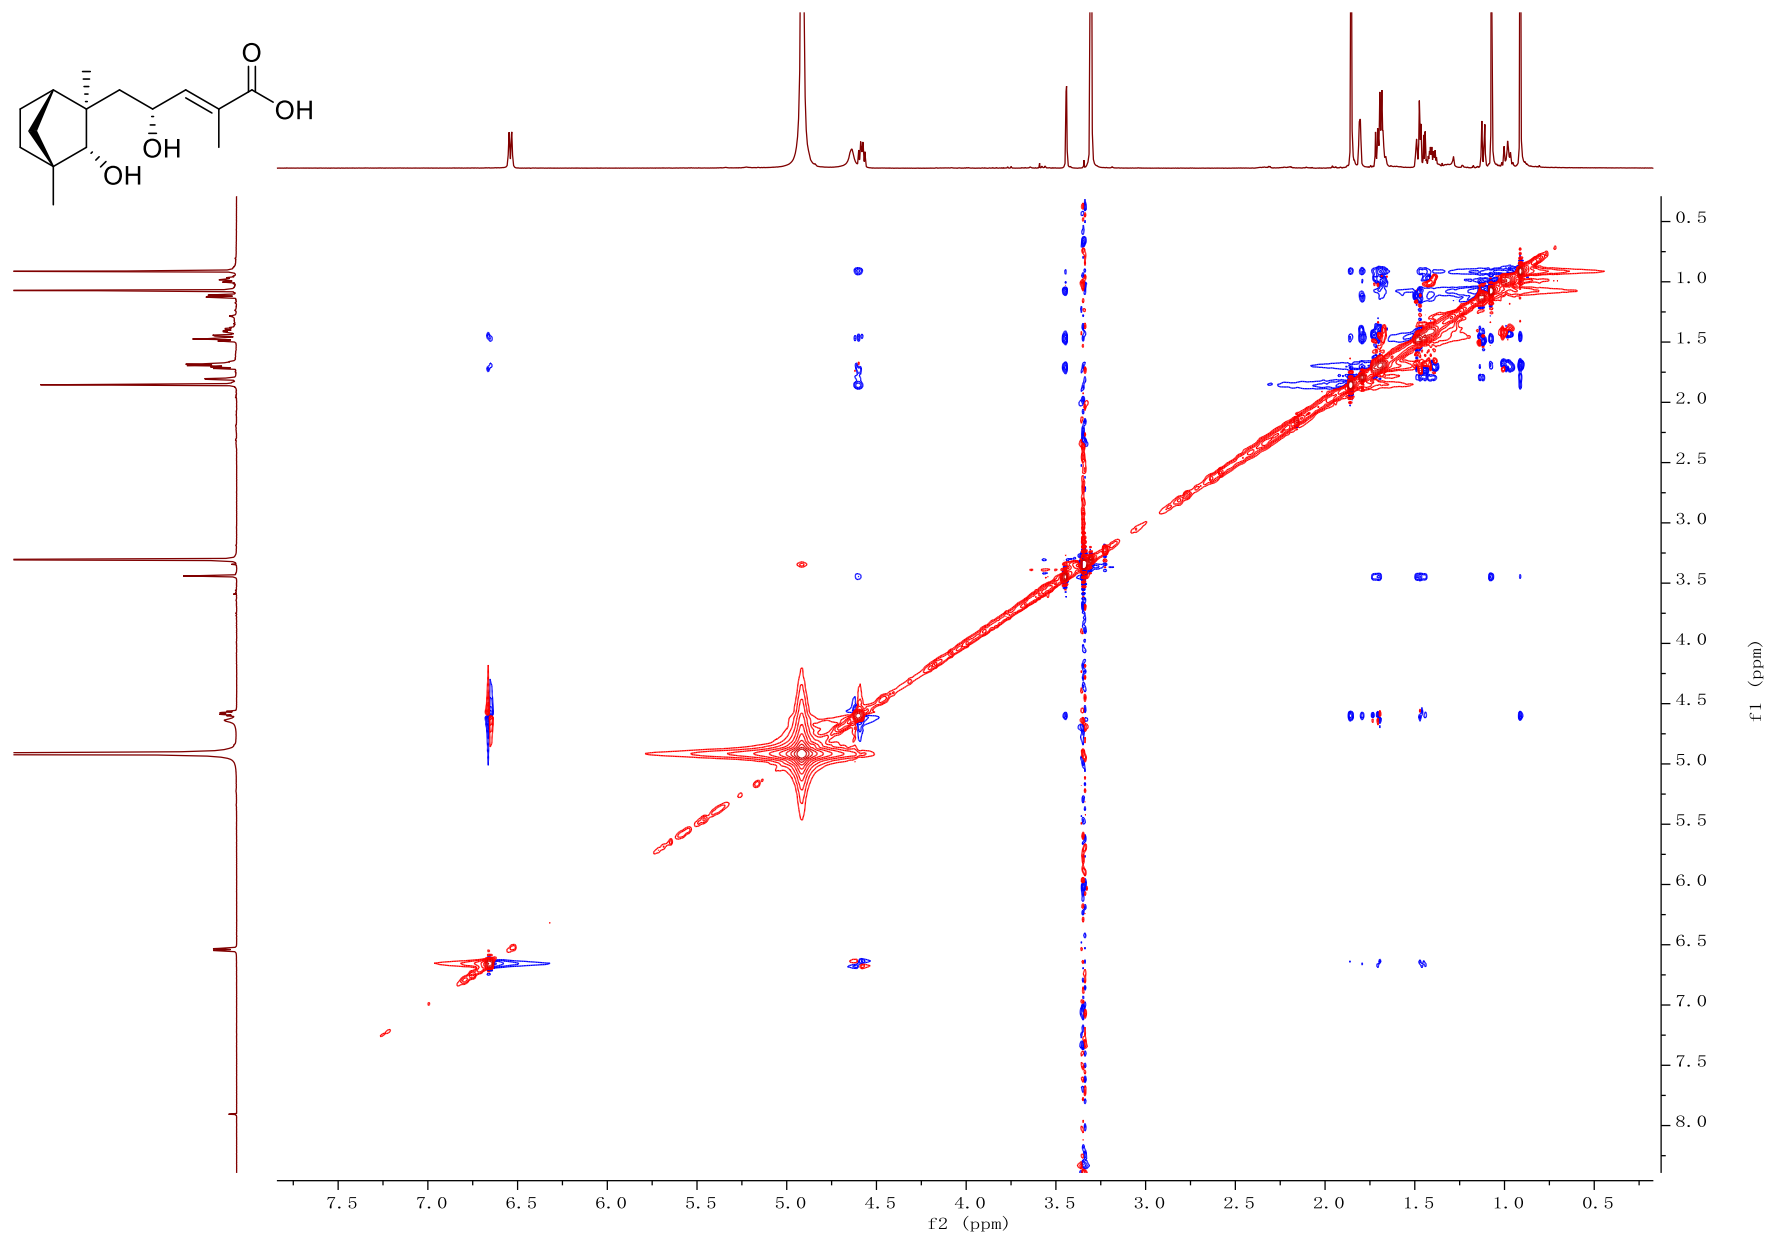

**Figure S51.** HR-ESIMS of compound **4**

T: FTMS - p ESI Full ms [150.0000-1100.0000]

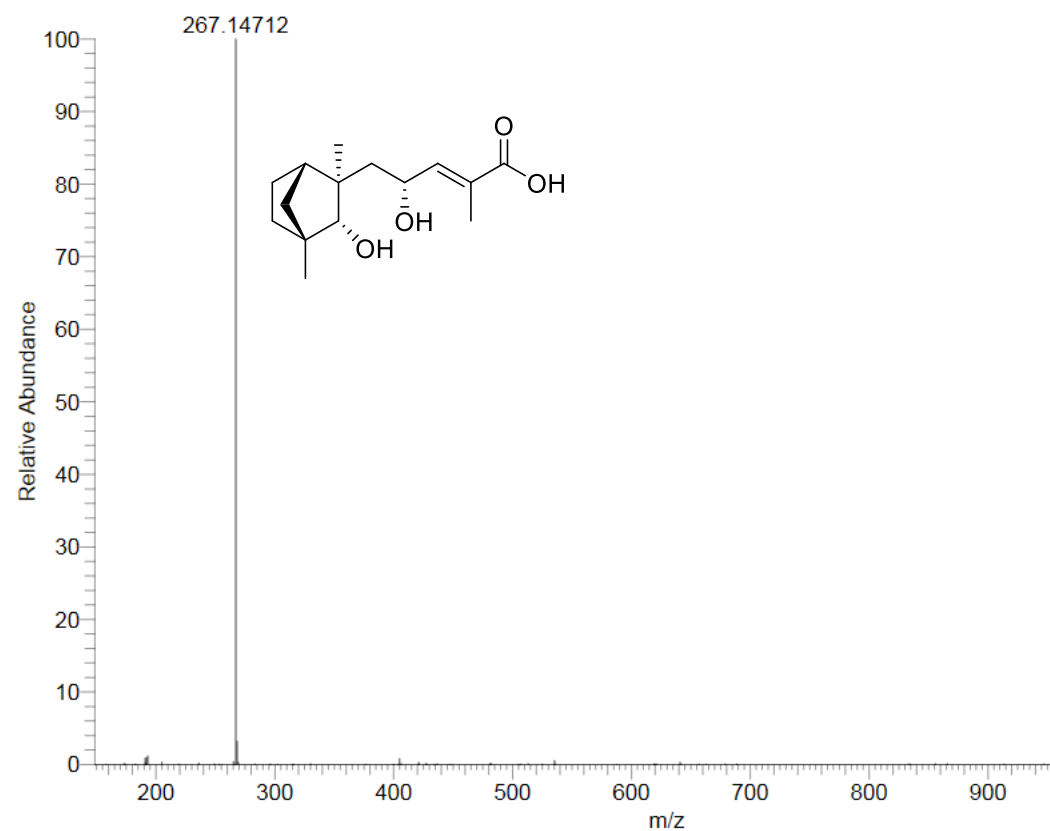

## Section S12. NMR and MS spectra for 5

**Figure S52.**  $^1\text{H}$  NMR of compound **5** in  $\text{CD}_3\text{OD}$

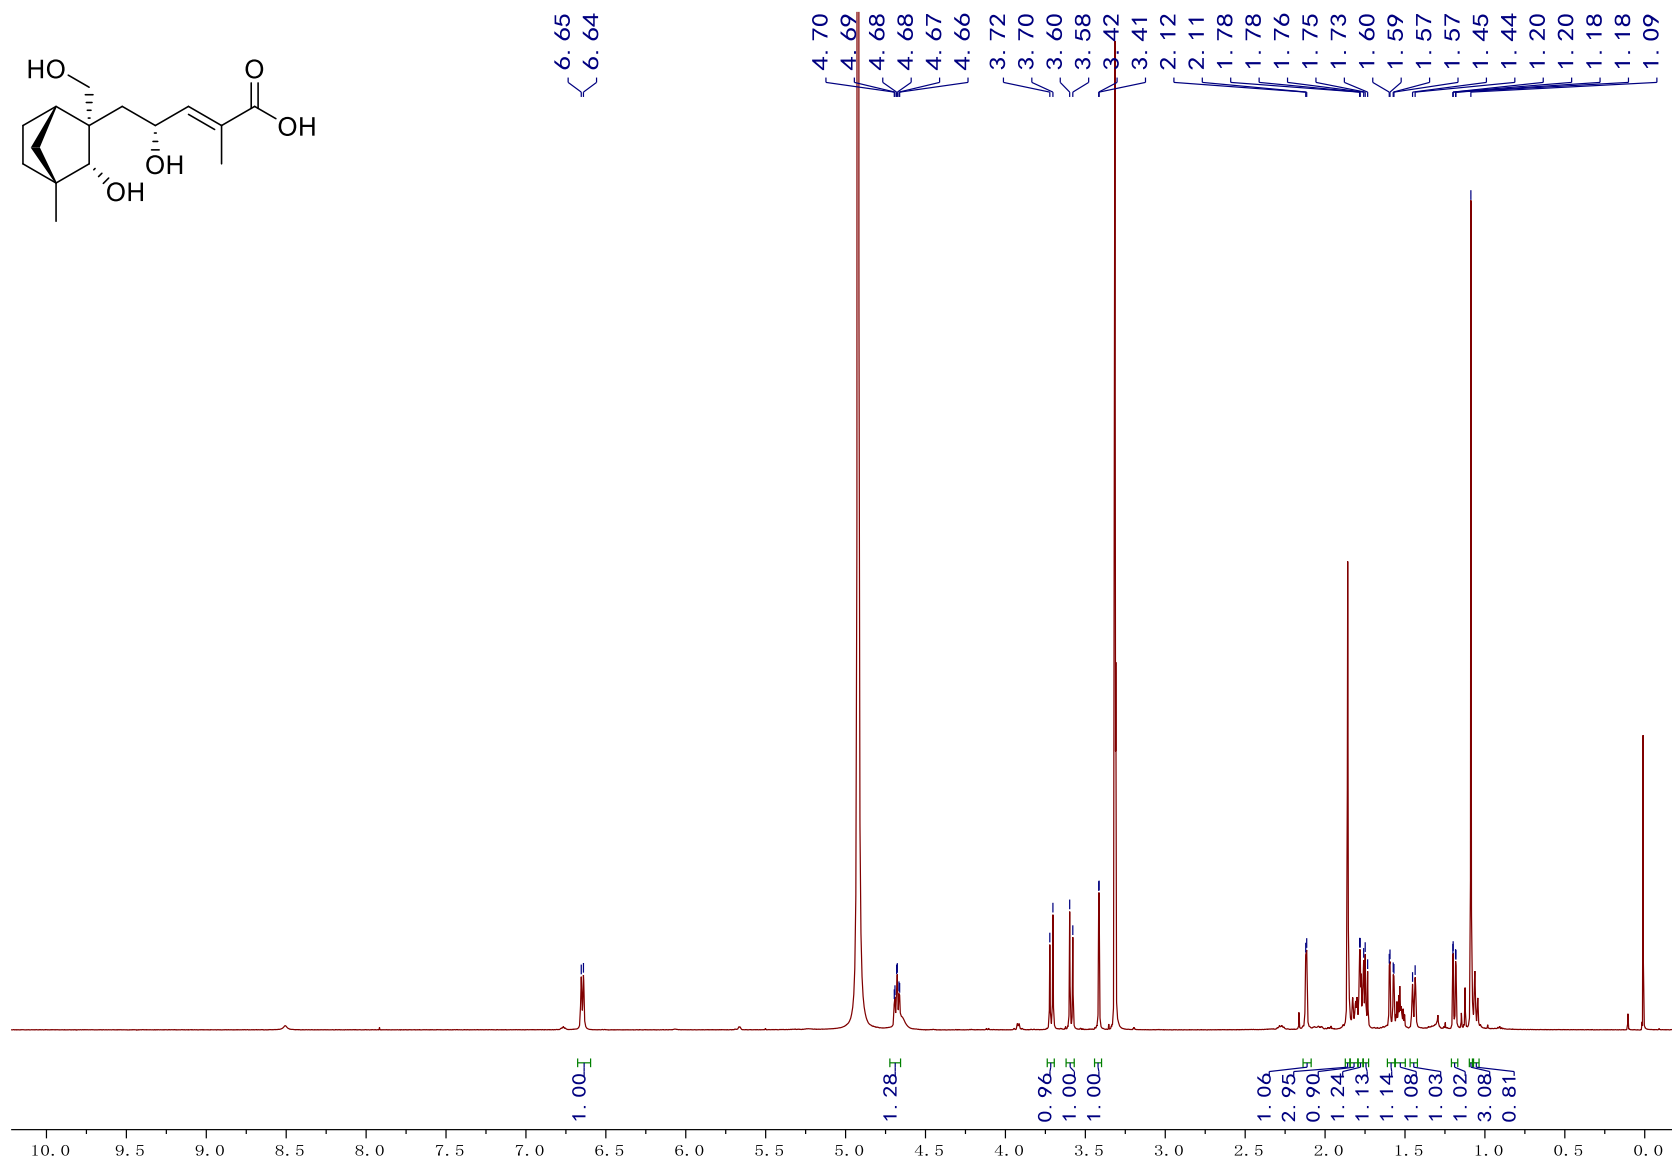



**Figure S53.**  $^{13}\text{C}$  NMR and DEPT of compound **5** in  $\text{CD}_3\text{OD}$

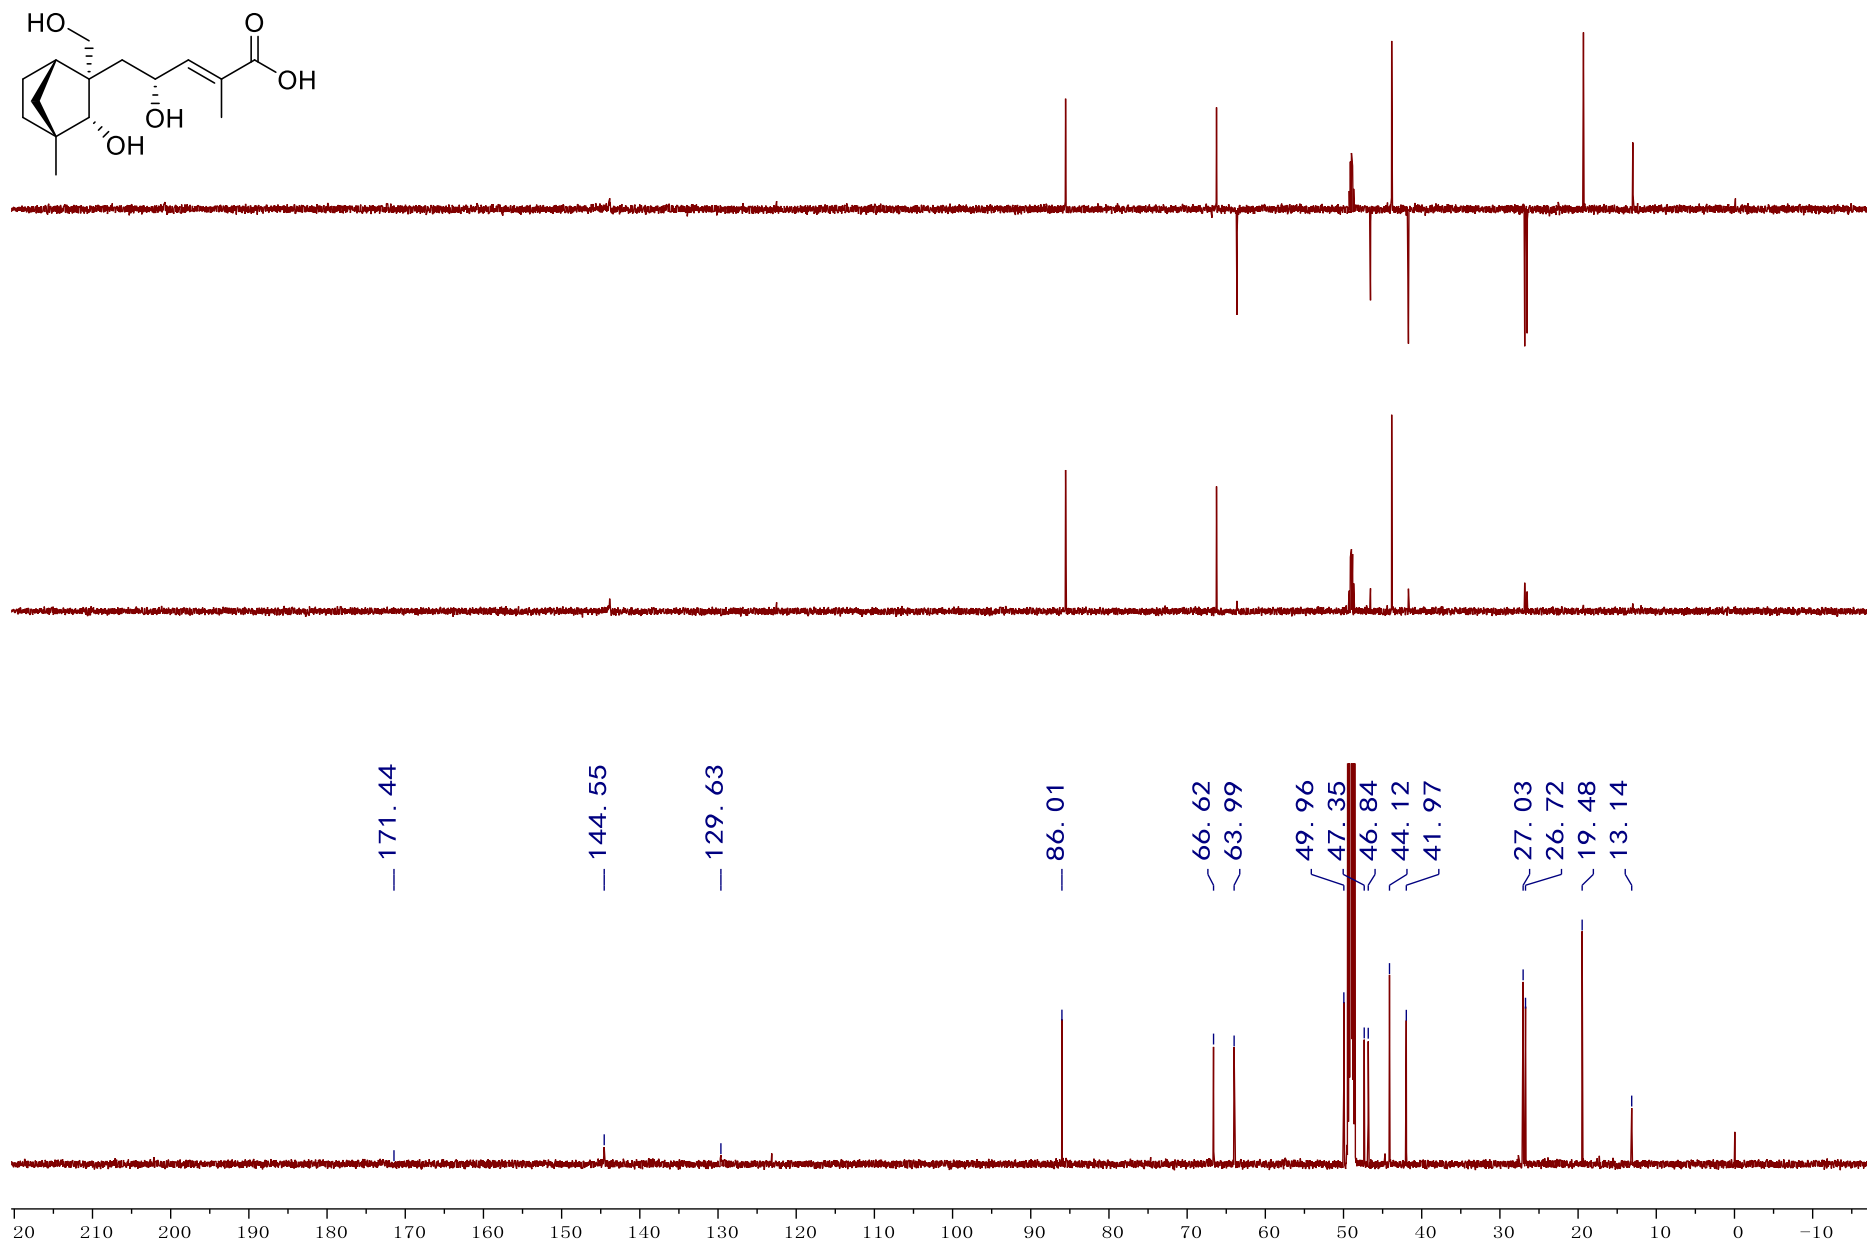

**Figure S54.** HSQC of compound **5** in CD<sub>3</sub>OD

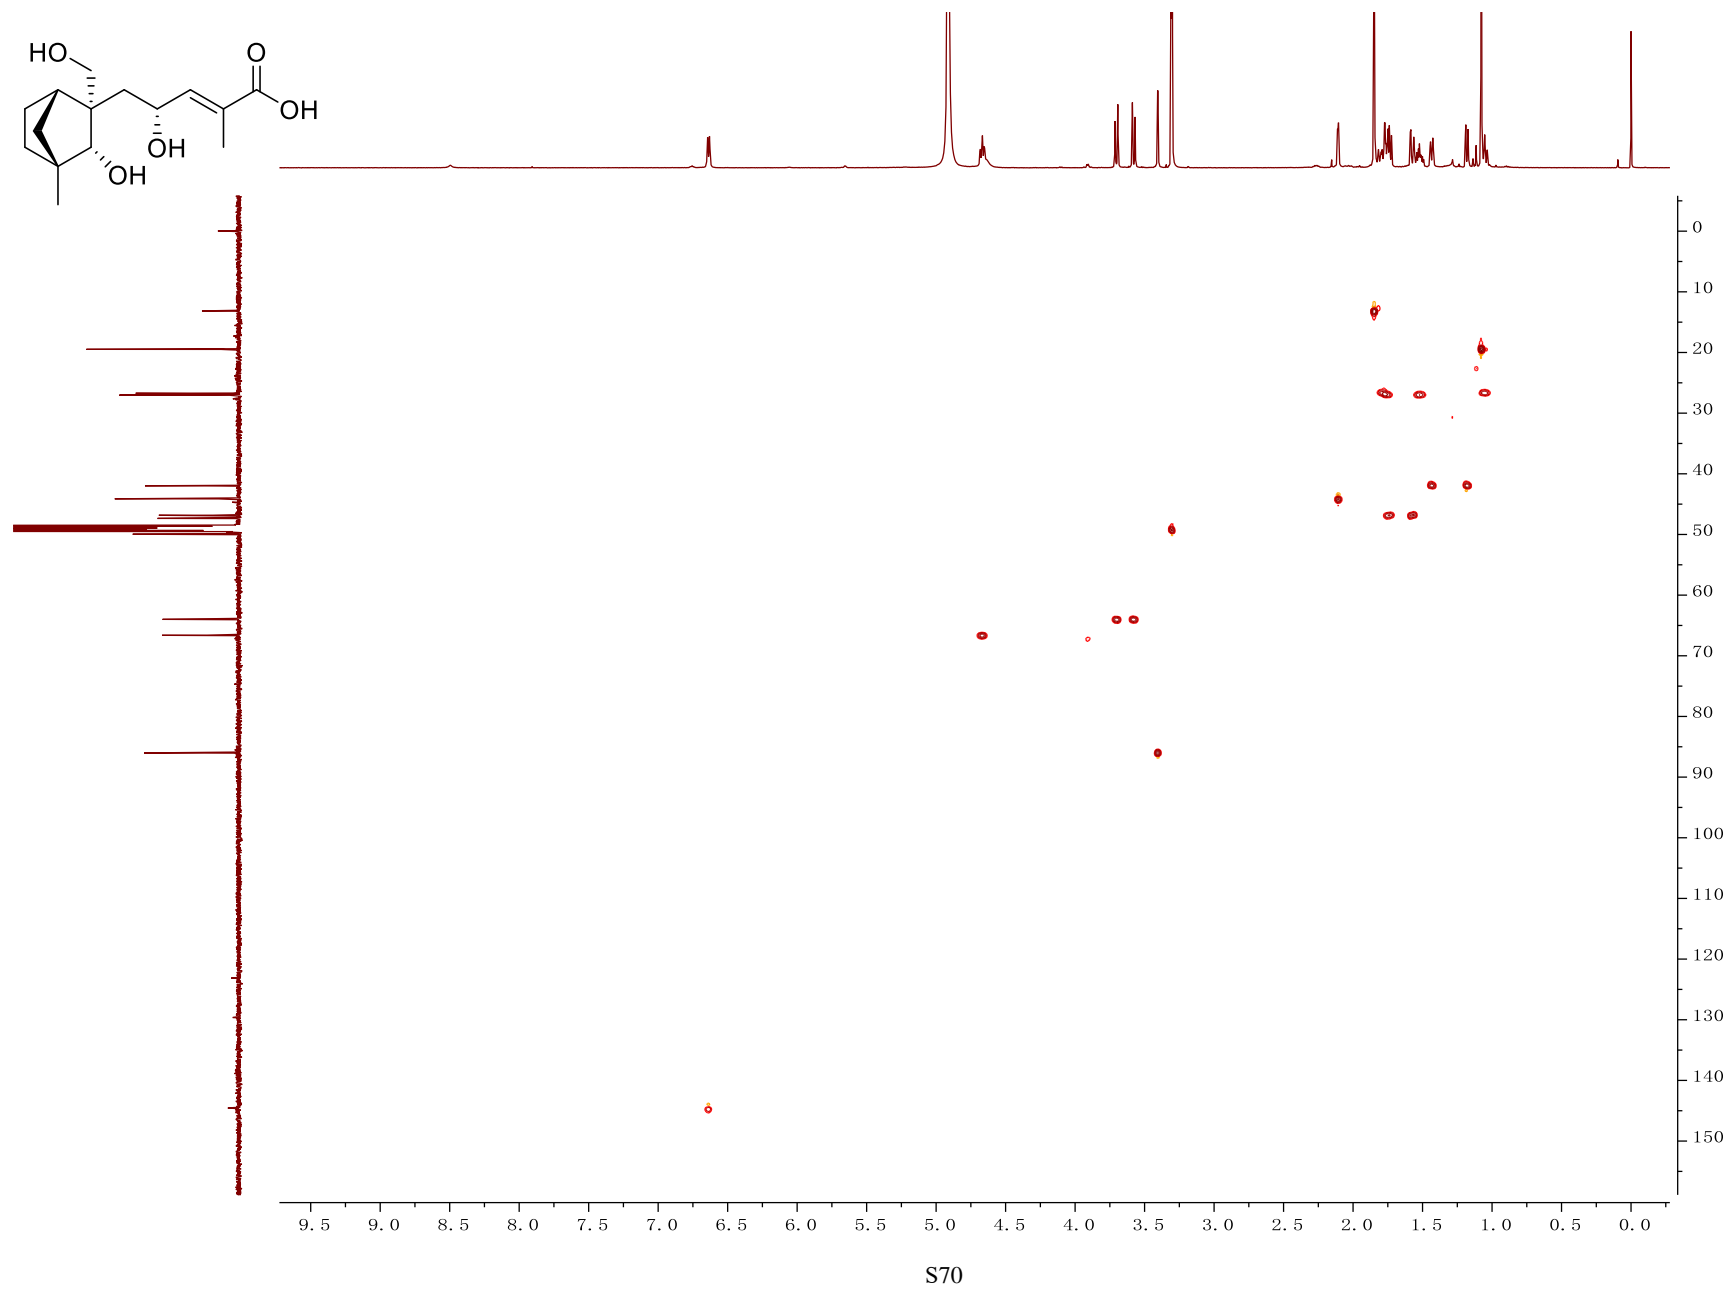

**Figure S55.** HMBC of compound **5** in CD<sub>3</sub>OD

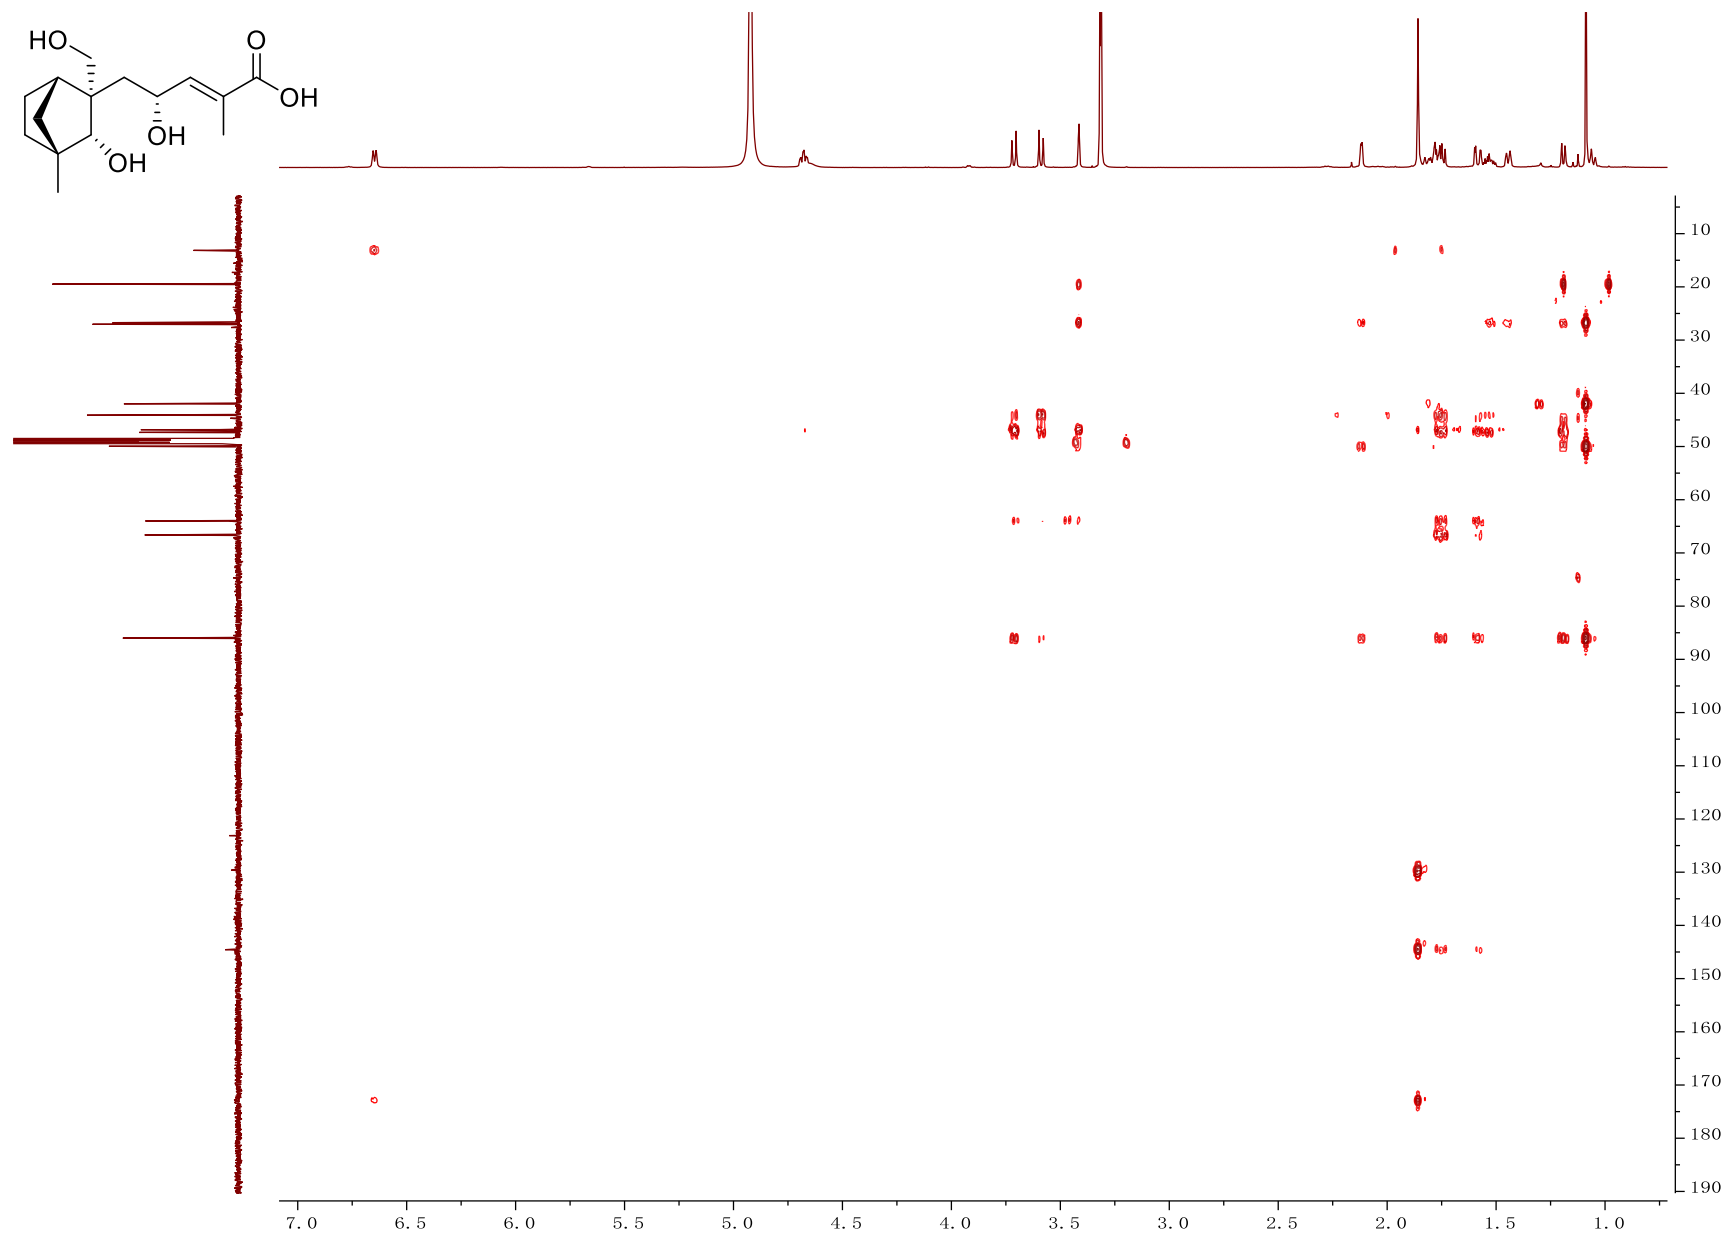

**Figure S56.**  $^1\text{H}$ - $^1\text{H}$  COSY of compound **5** in  $\text{CD}_3\text{OD}$

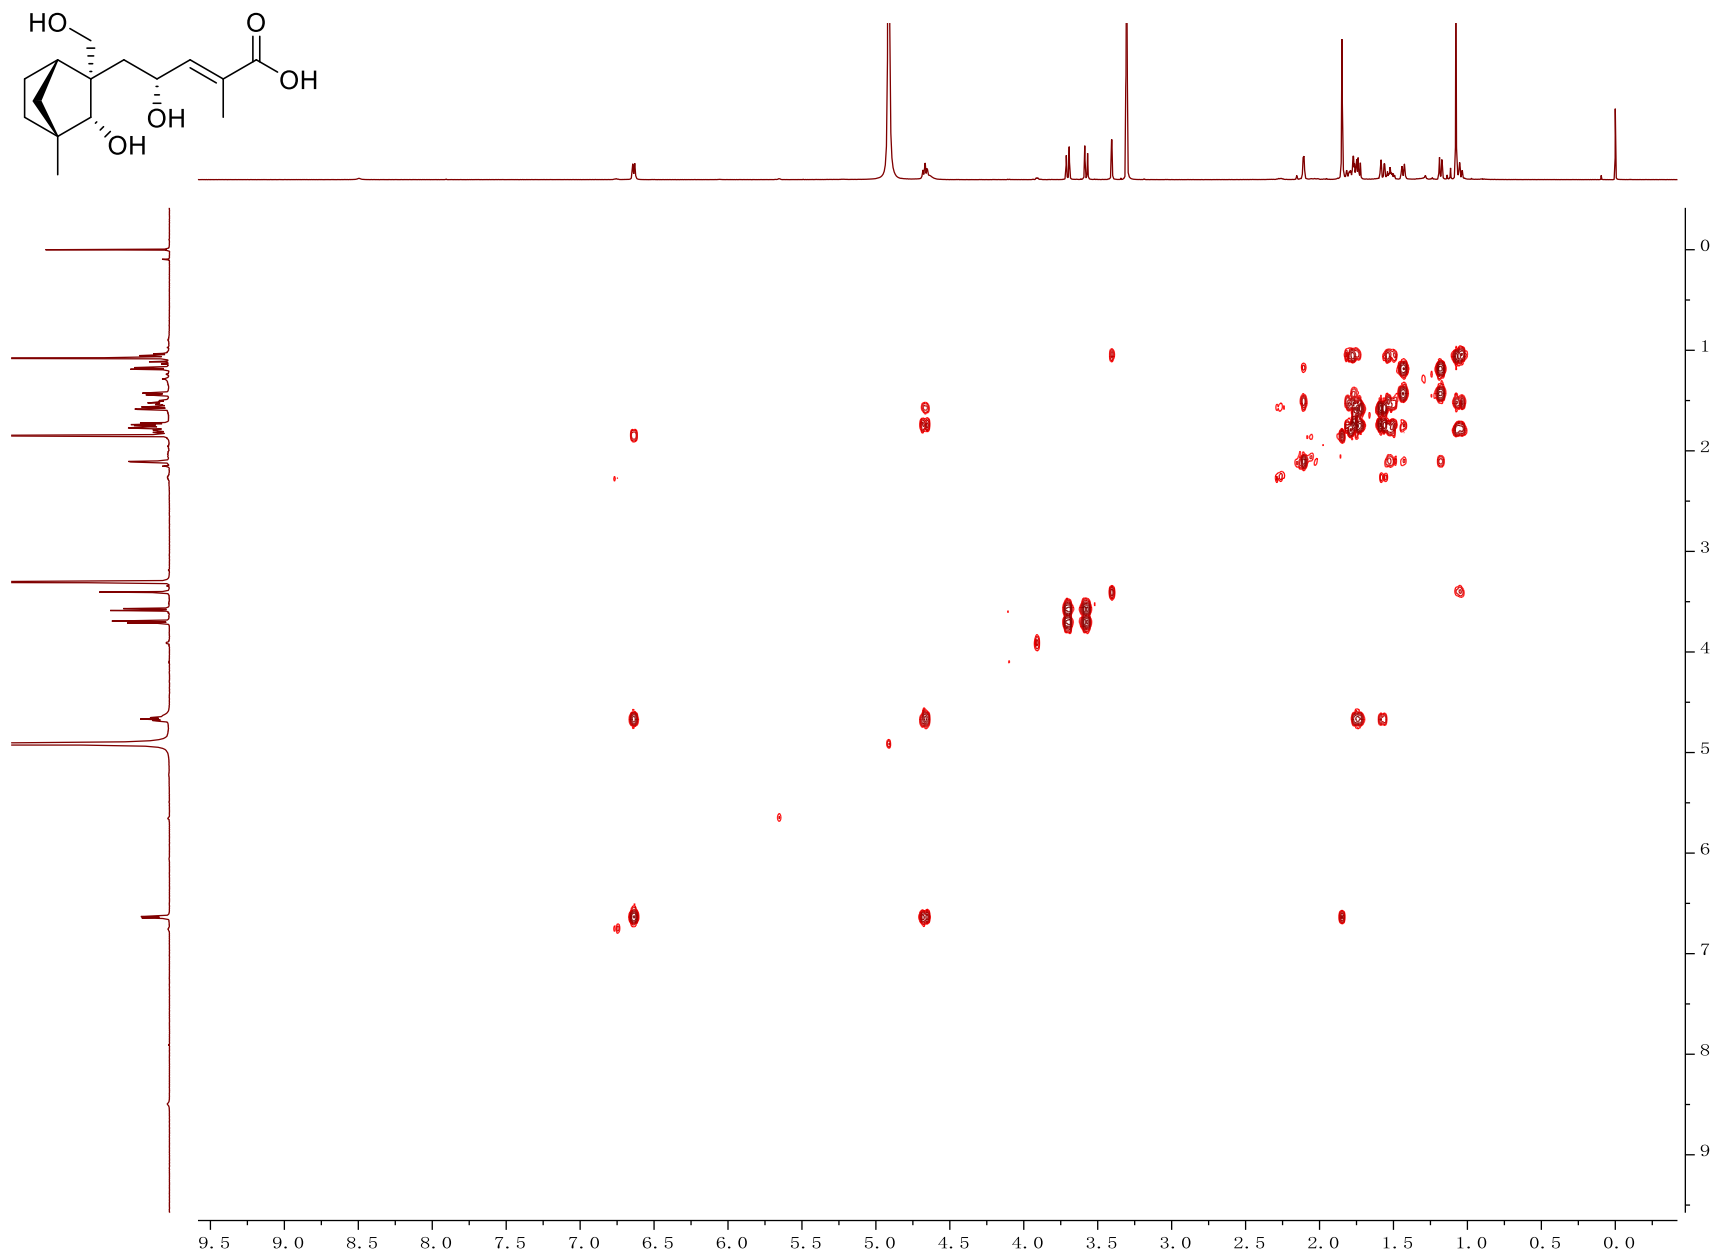

**Figure S57.** ROESY of compound **5** in CD<sub>3</sub>OD

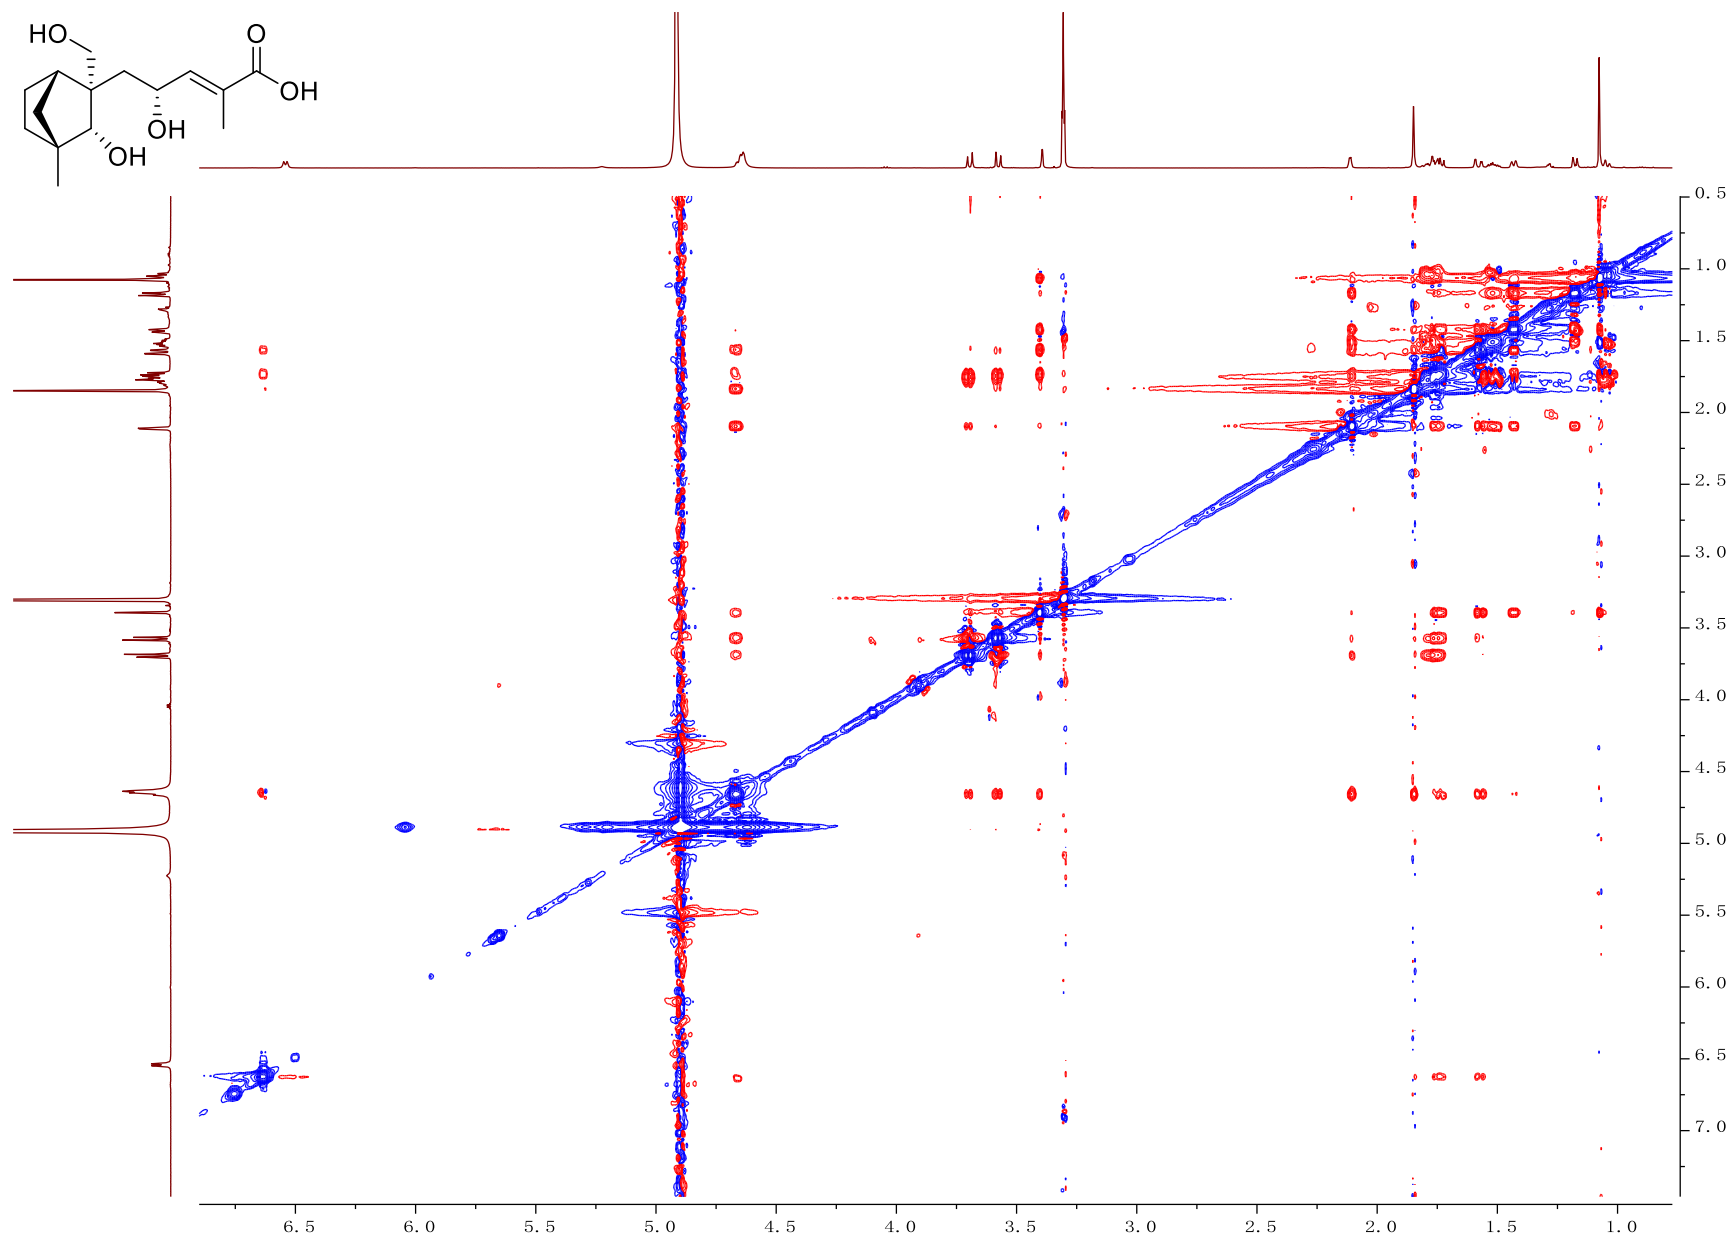

**Figure S58.** HR-ESIMS of compound **5**

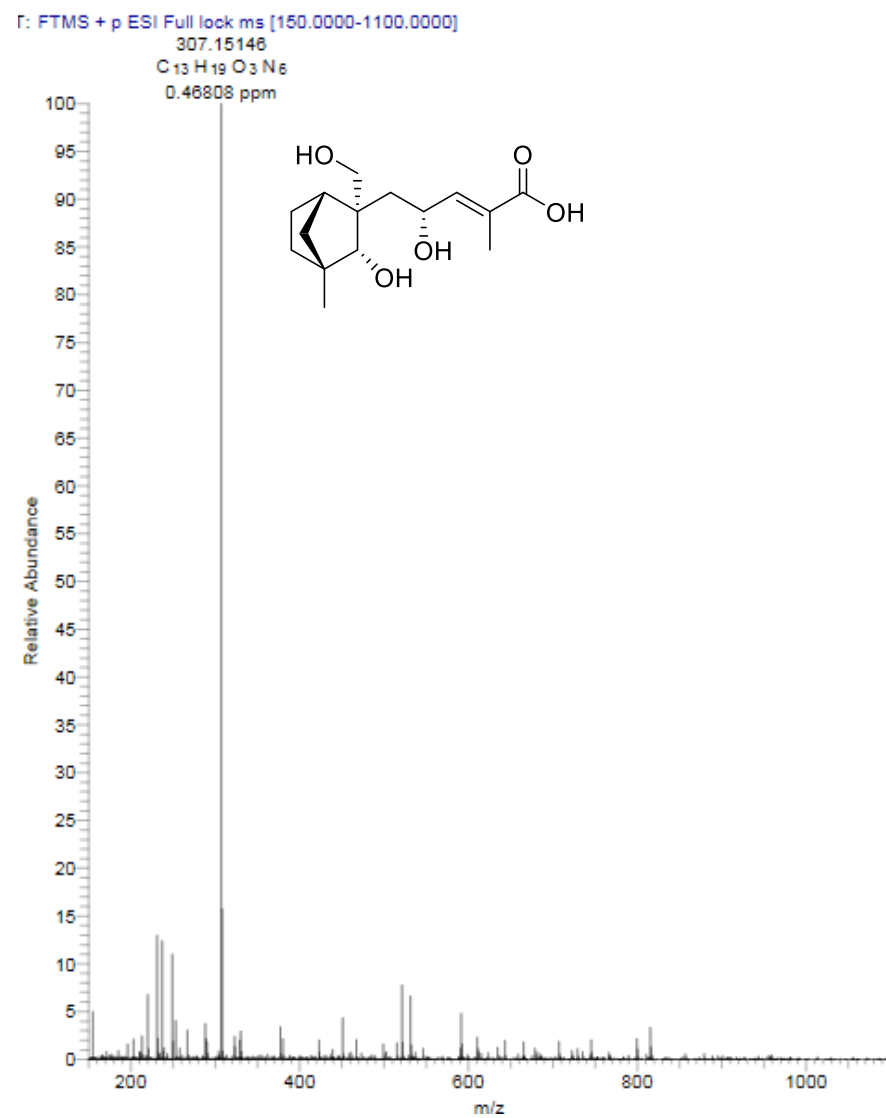

## Section S13. NMR and MS spectra for 6

**Figure S59.**  $^1\text{H}$  NMR of compound **6** in  $\text{CD}_3\text{OD}$

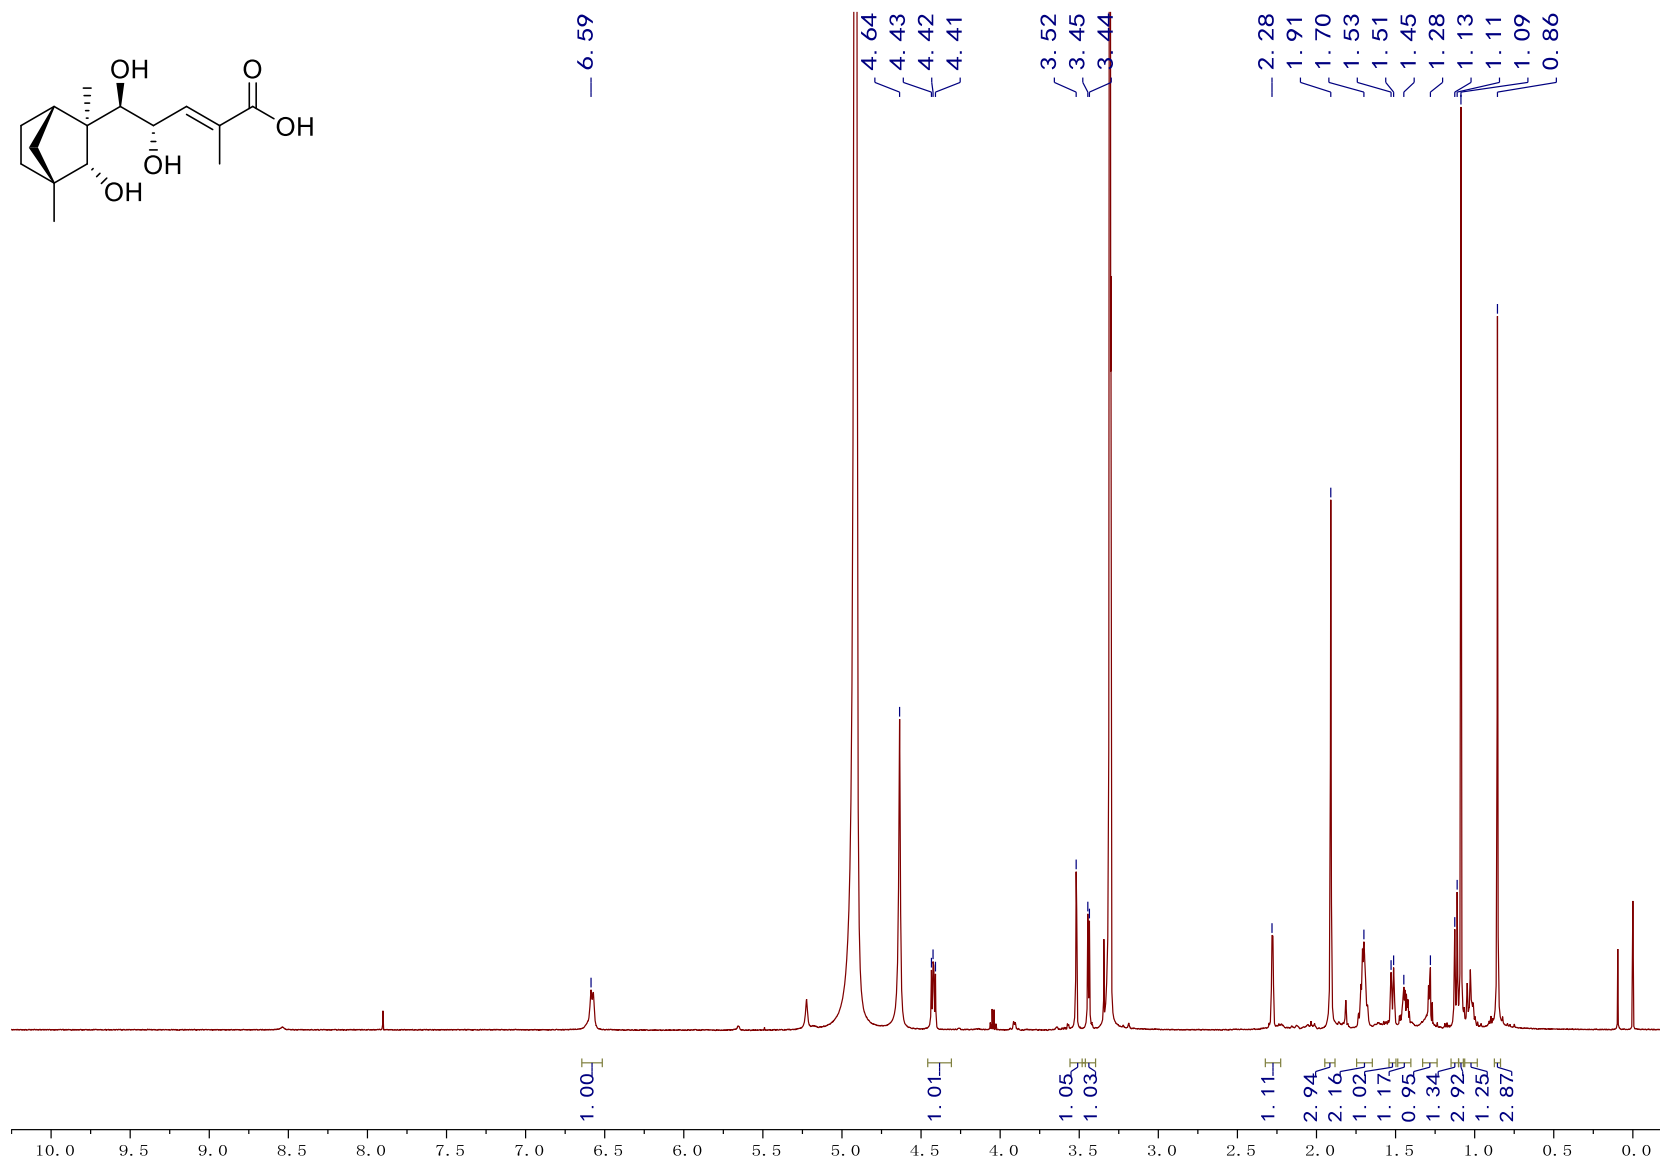

**Figure S60.**  $^{13}\text{C}$  NMR and DEPT of compound **6** in  $\text{CD}_3\text{OD}$

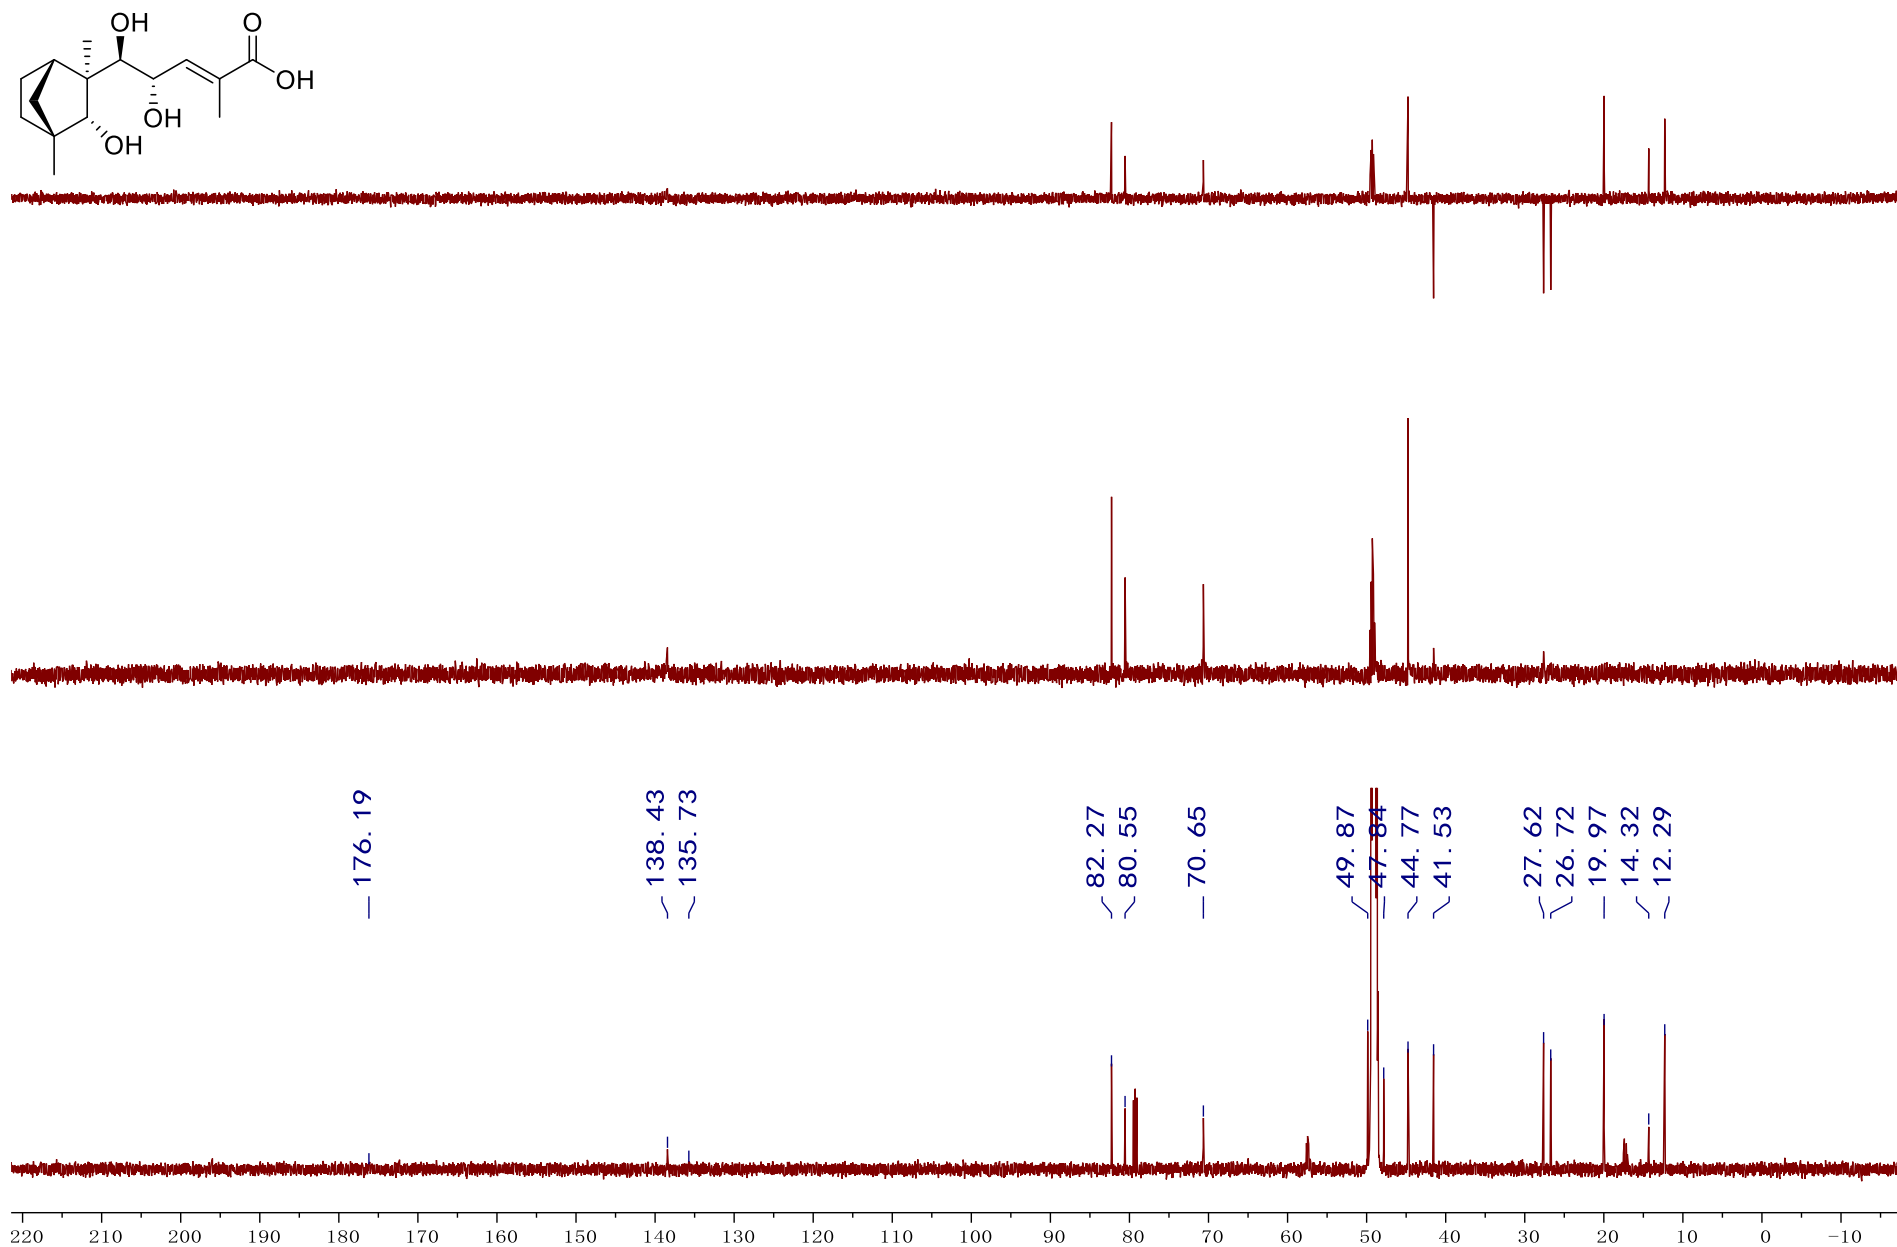



**Figure S61.** HSQC of compound **6** in CD<sub>3</sub>OD

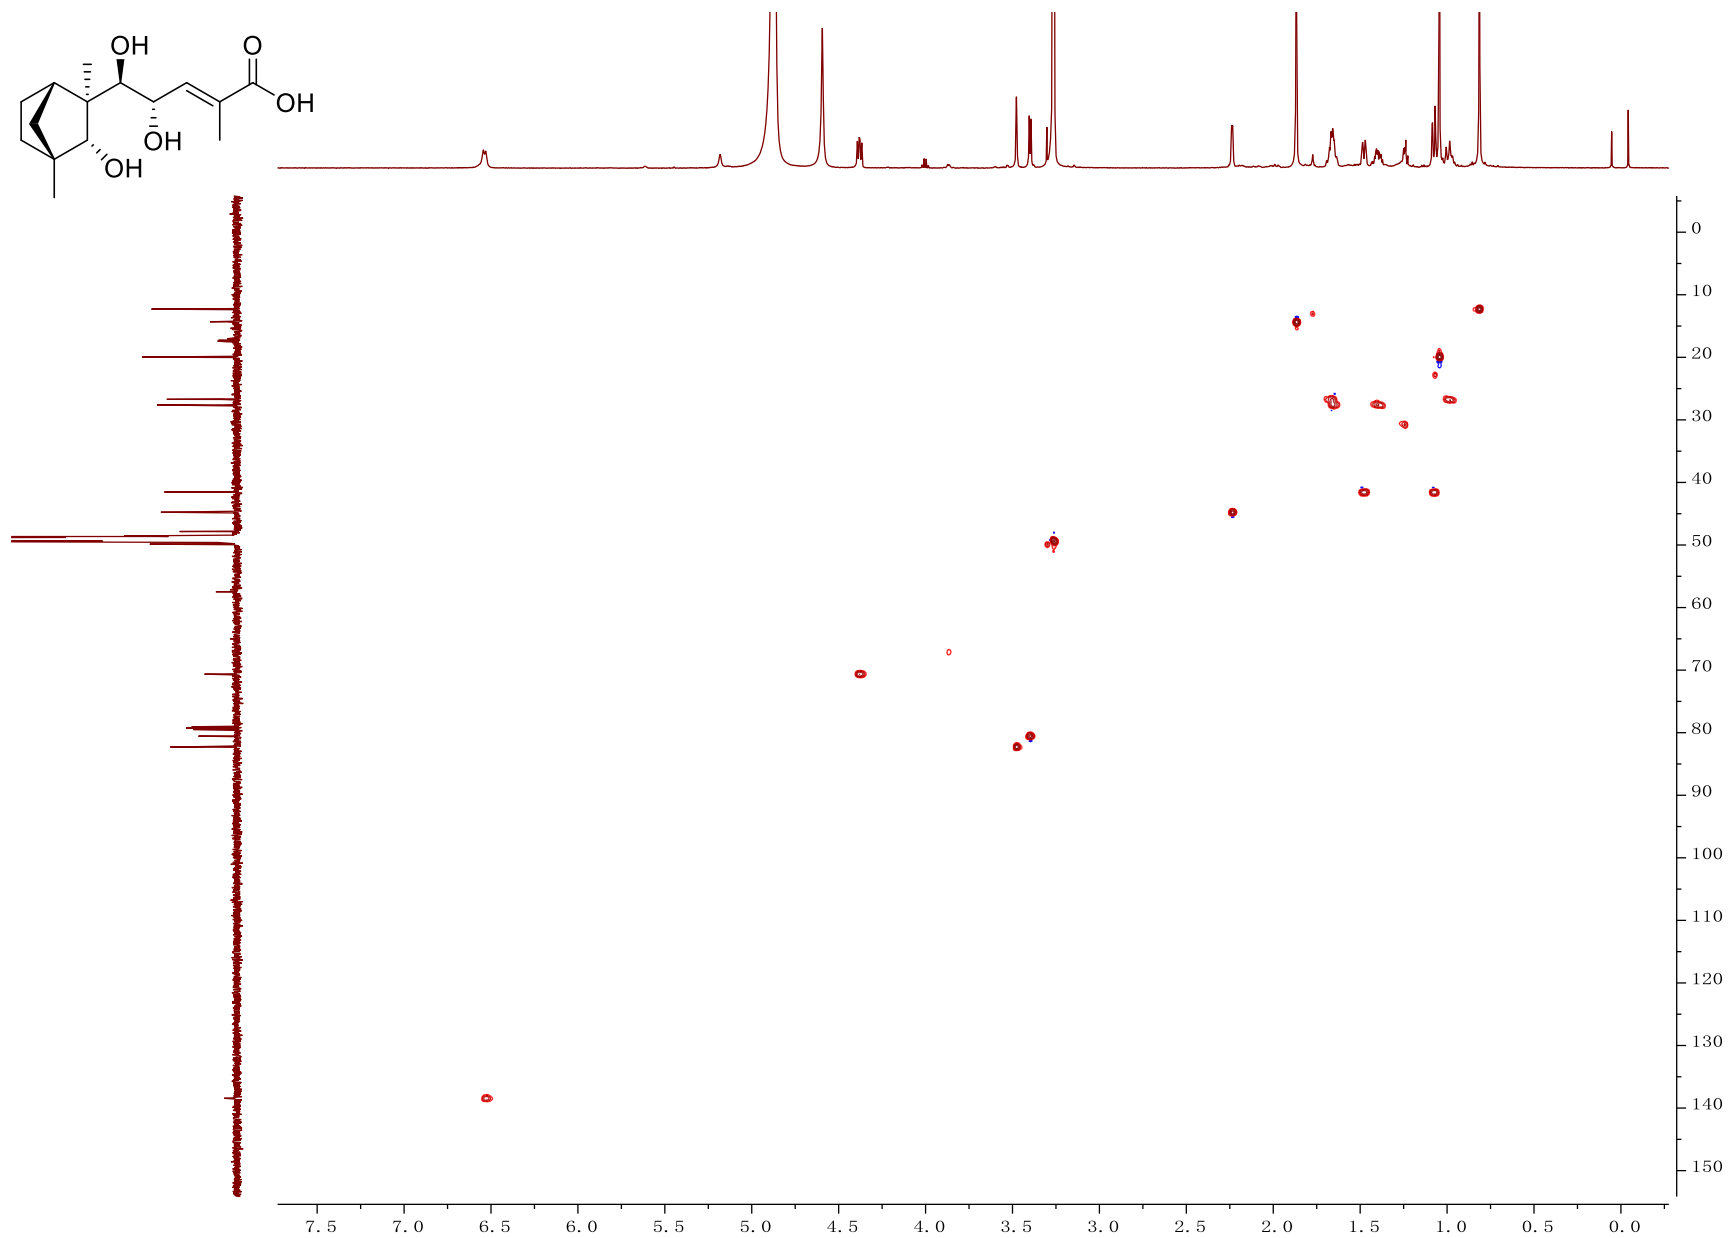

**Figure S62.** HMBC of compound **6** in CD<sub>3</sub>OD

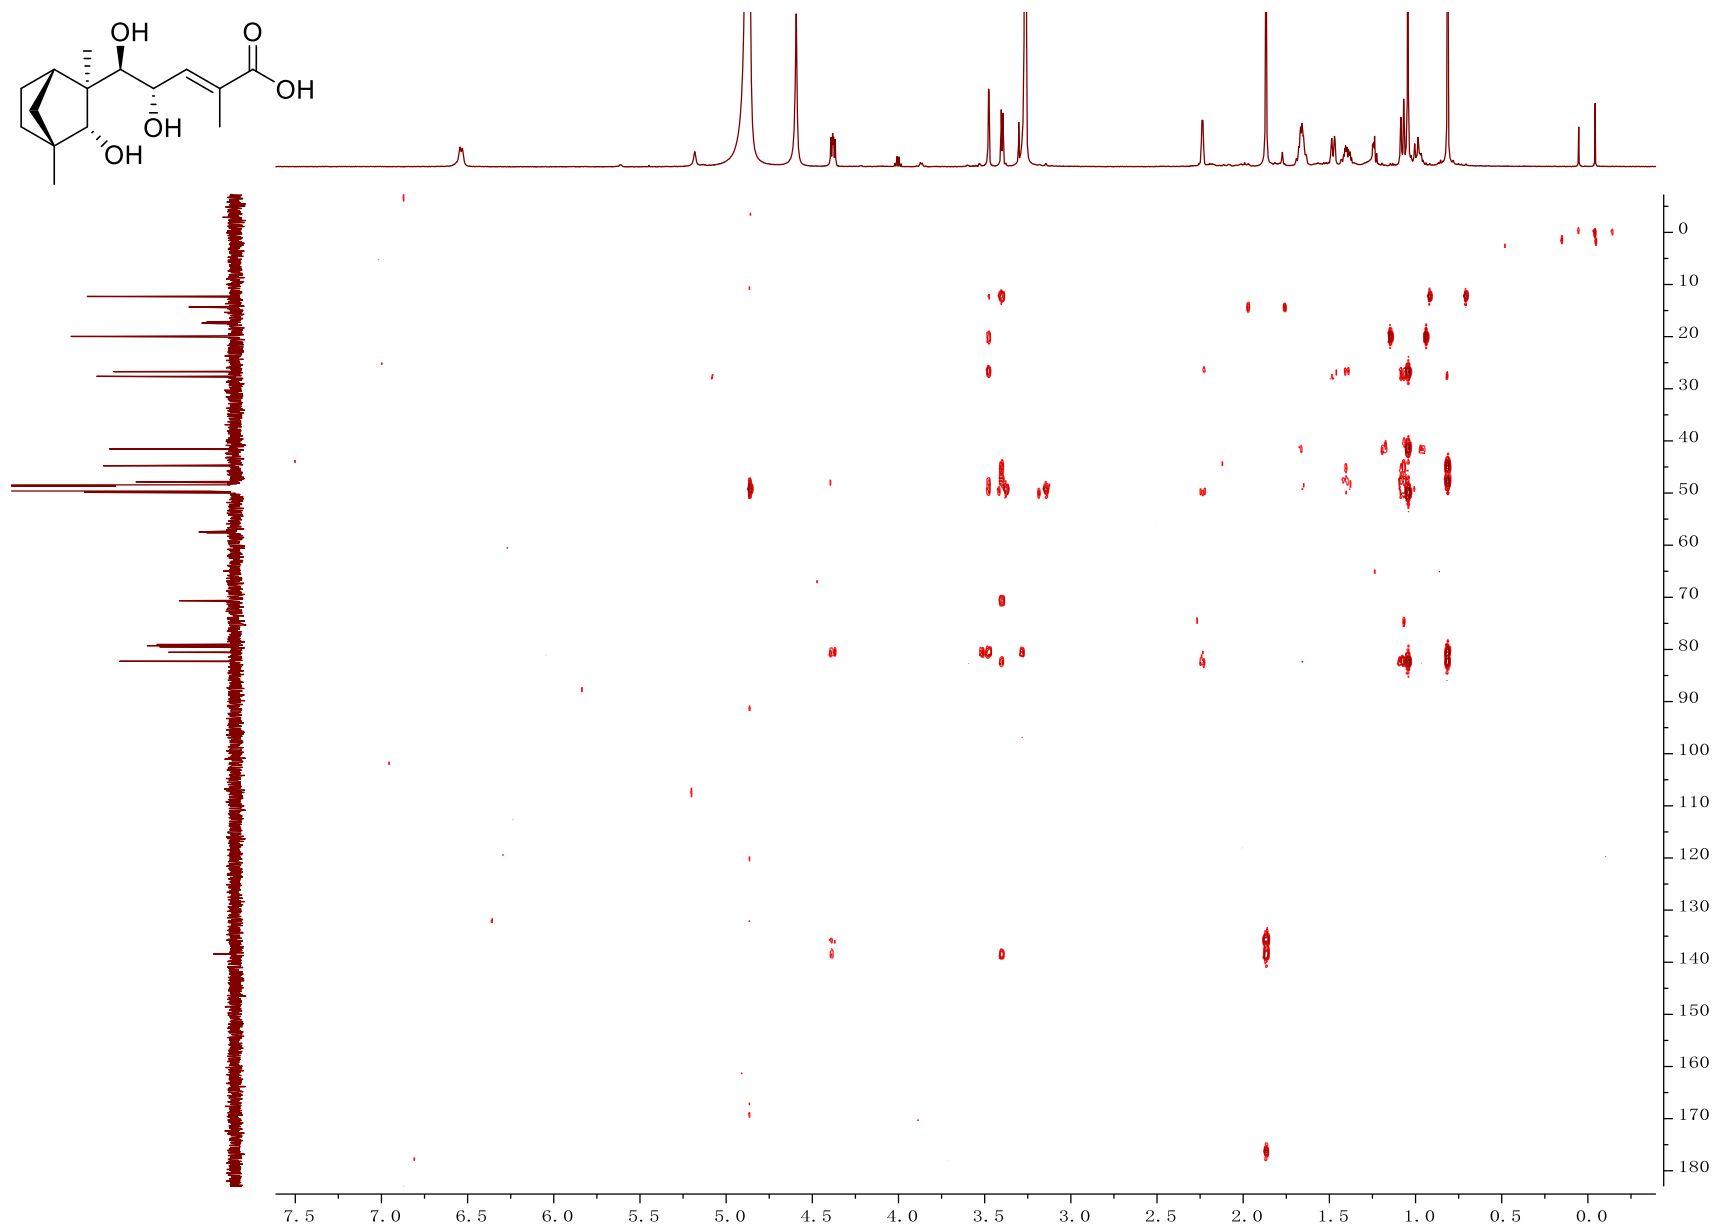

**Figure S63.**  $^1\text{H}$ - $^1\text{H}$  COSY of compound **6** in  $\text{CD}_3\text{OD}$

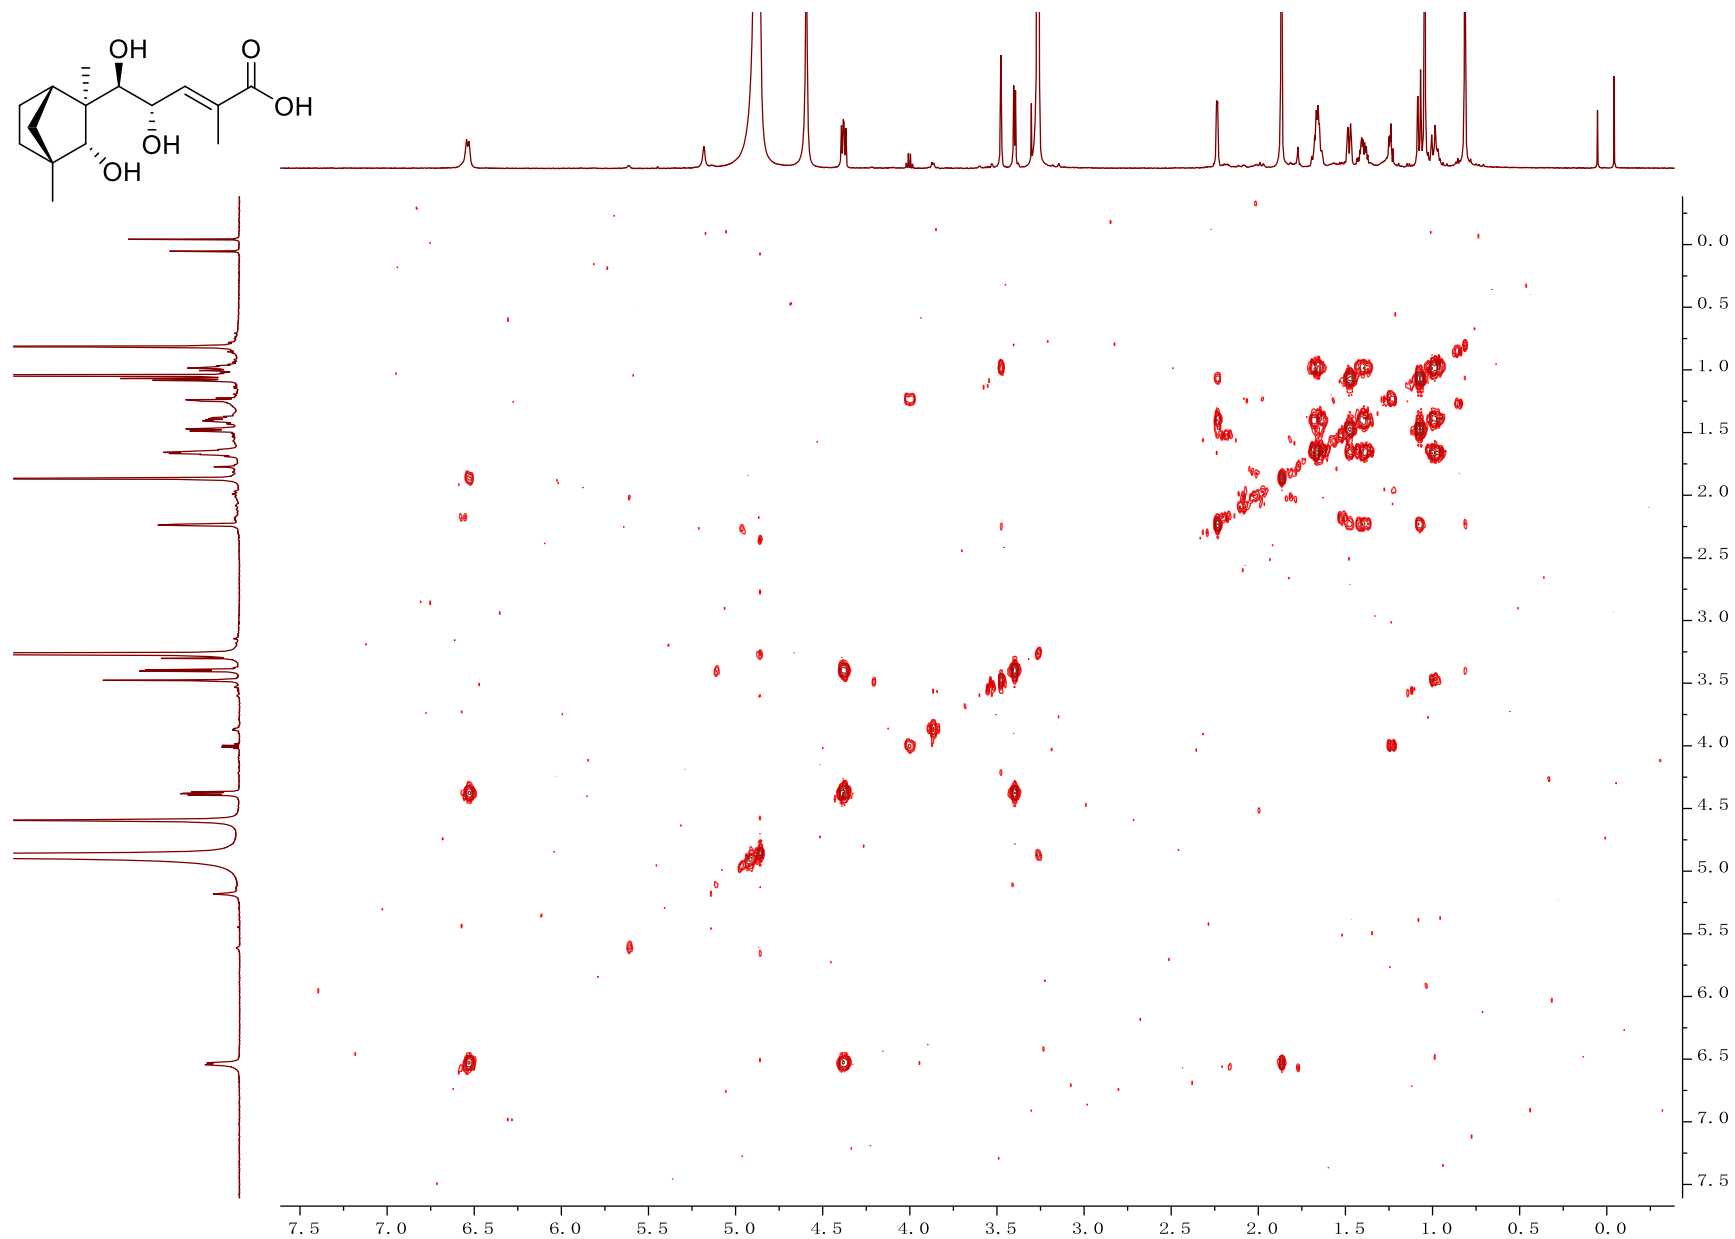

**Figure S64.** ROESY of compound **6** in CD<sub>3</sub>OD

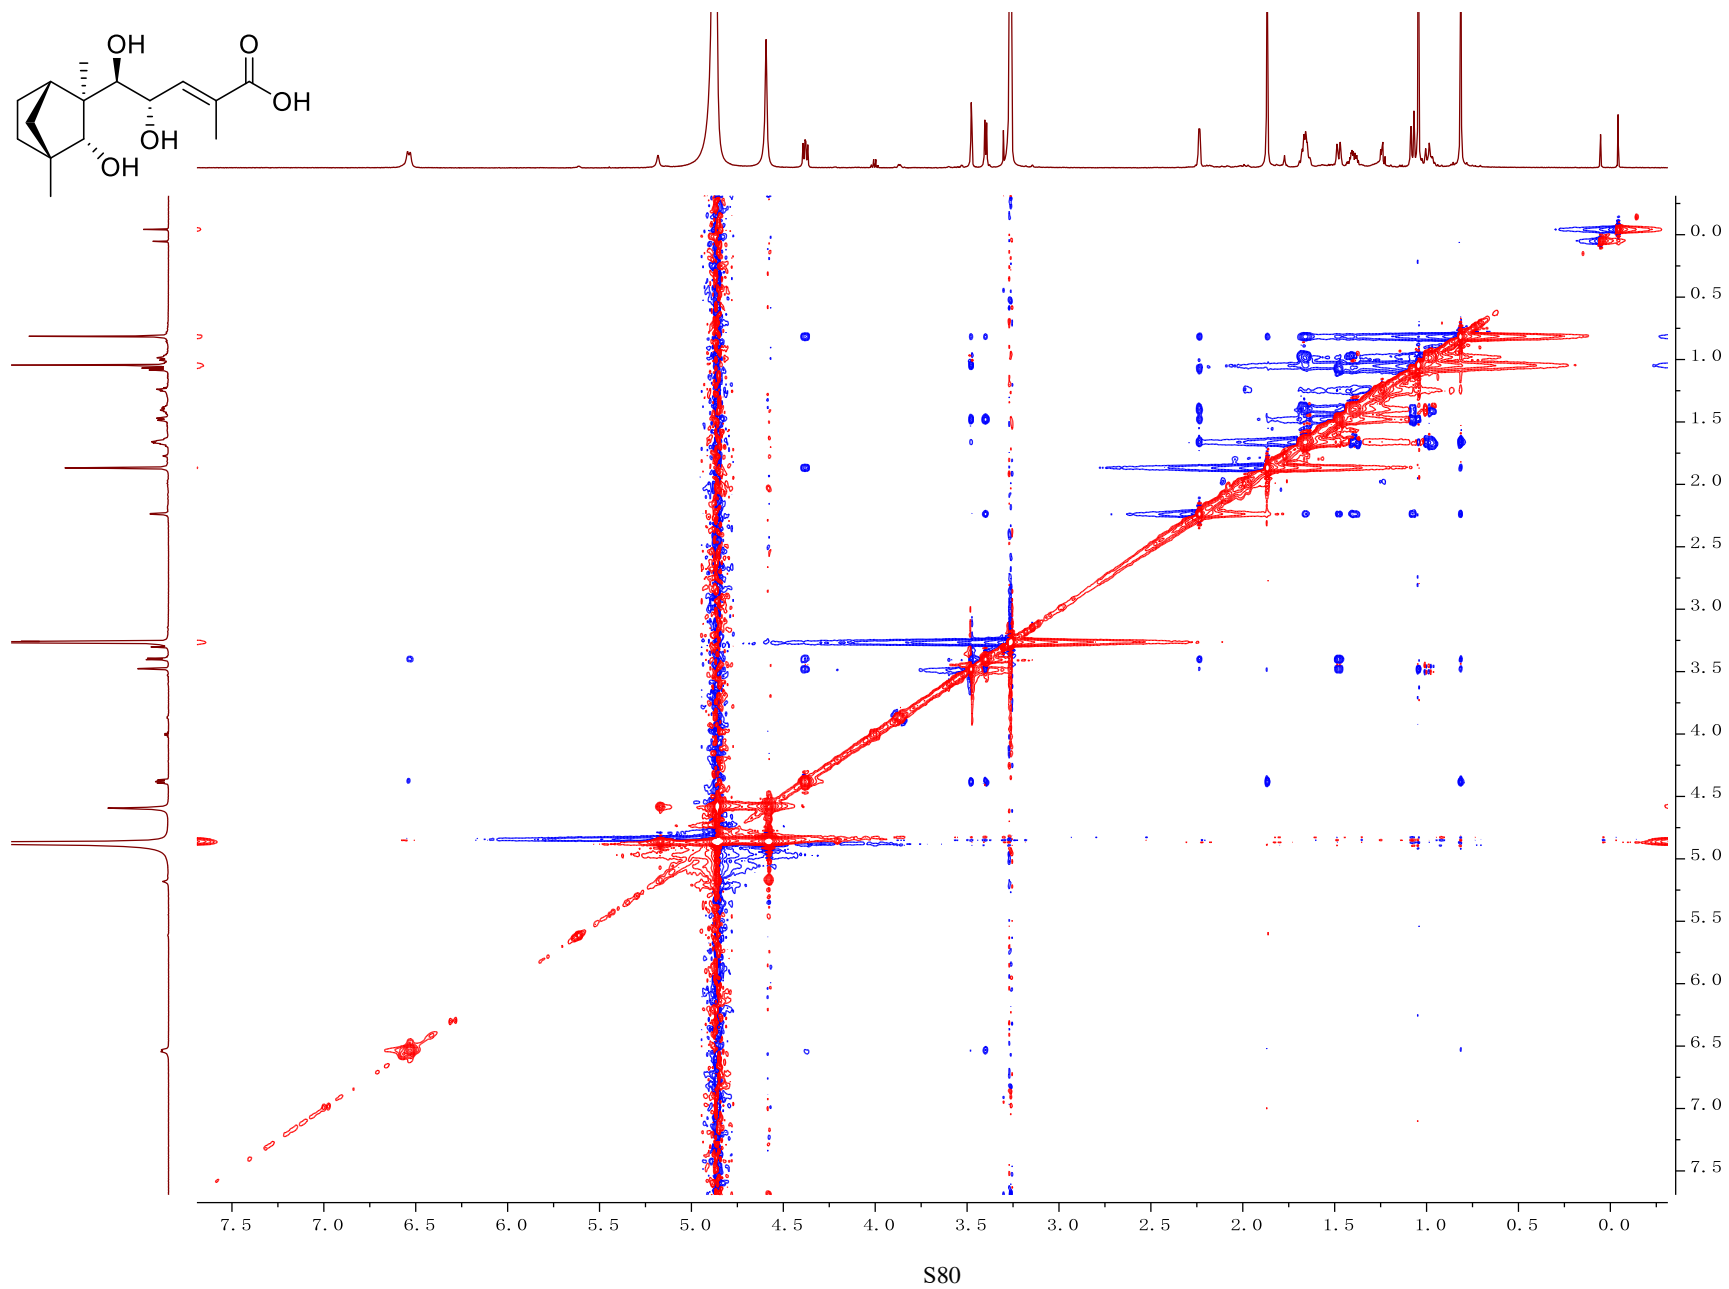

**Figure S65.** HR-ESIMS of compound **6**

T: FTMS + p ESI Full lock ms [150.0000-1100.0000]

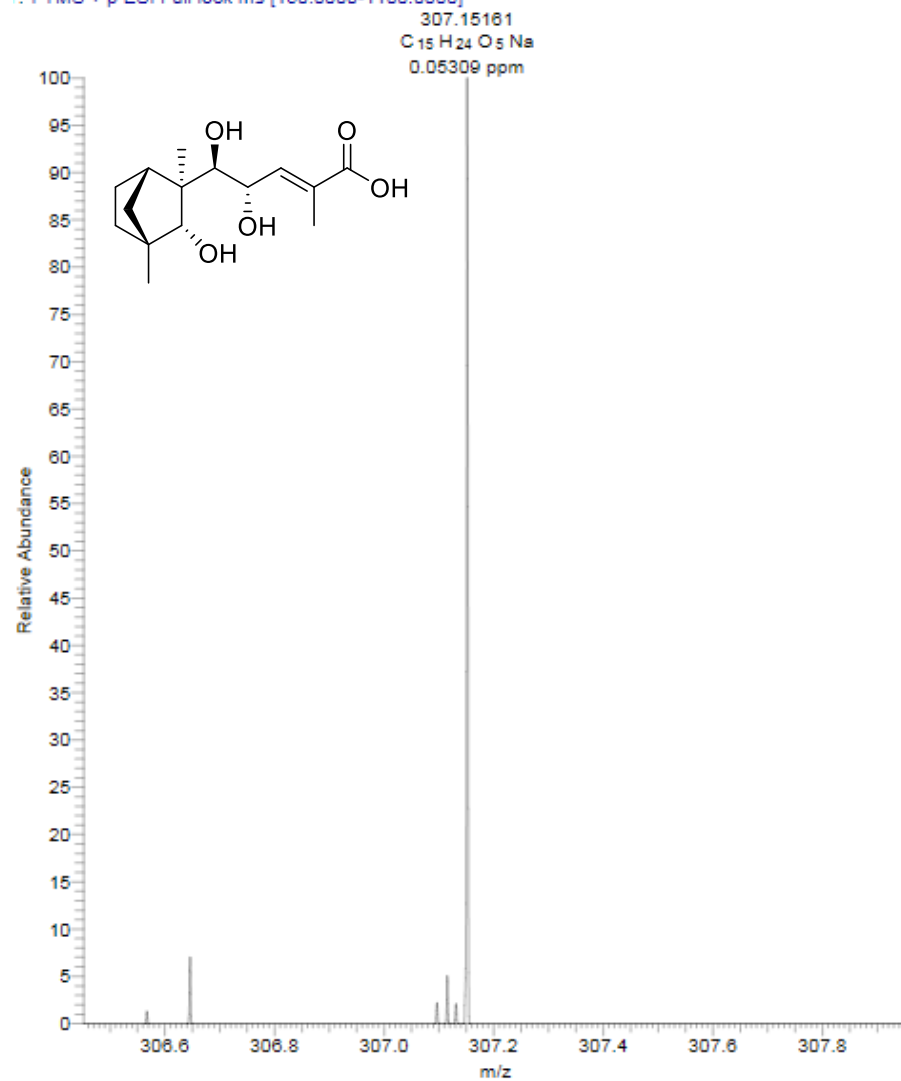

## Section S14. NMR and MS spectra for 7*S*,9*S*,14*S*-7

**Figure S66.**  $^1\text{H}$  NMR of compound 7*S*,9*S*,14*S*-7 in  $\text{CD}_3\text{OD}$

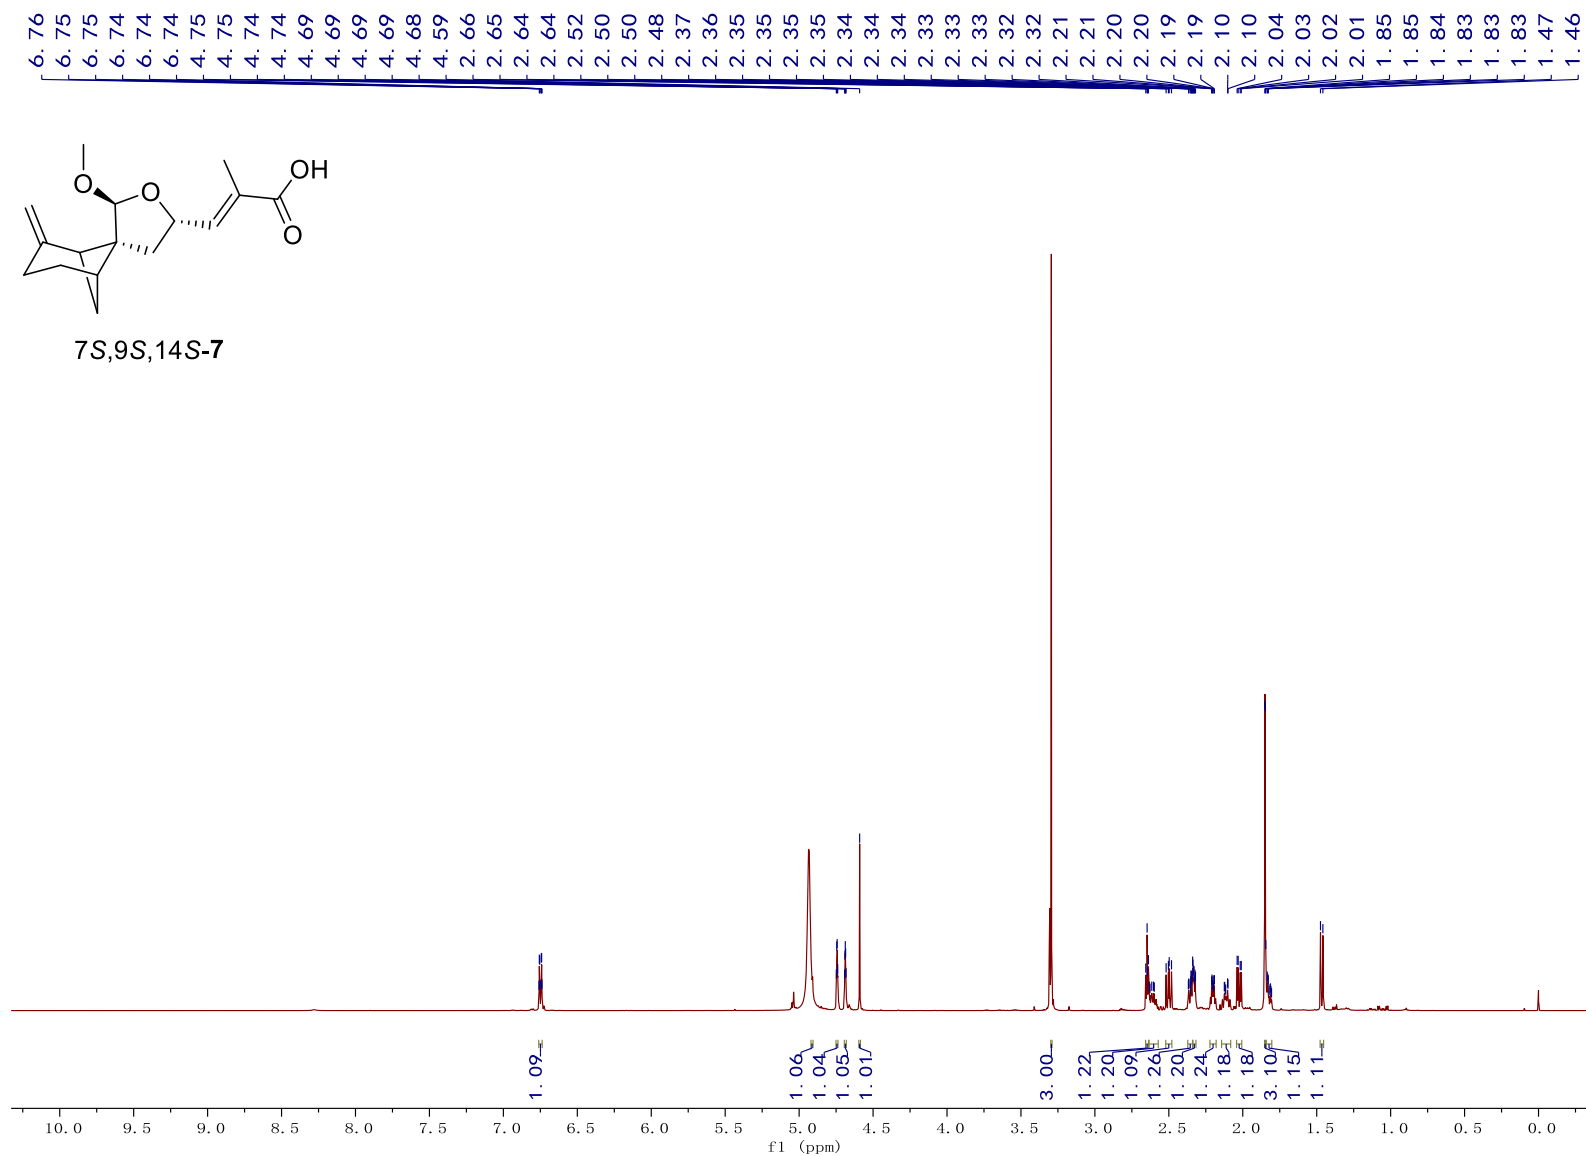

**Figure S67.**  $^{13}\text{C}$  NMR and DEPT of compound 7*S*,9*S*,14*S*-7 in  $\text{CD}_3\text{OD}$

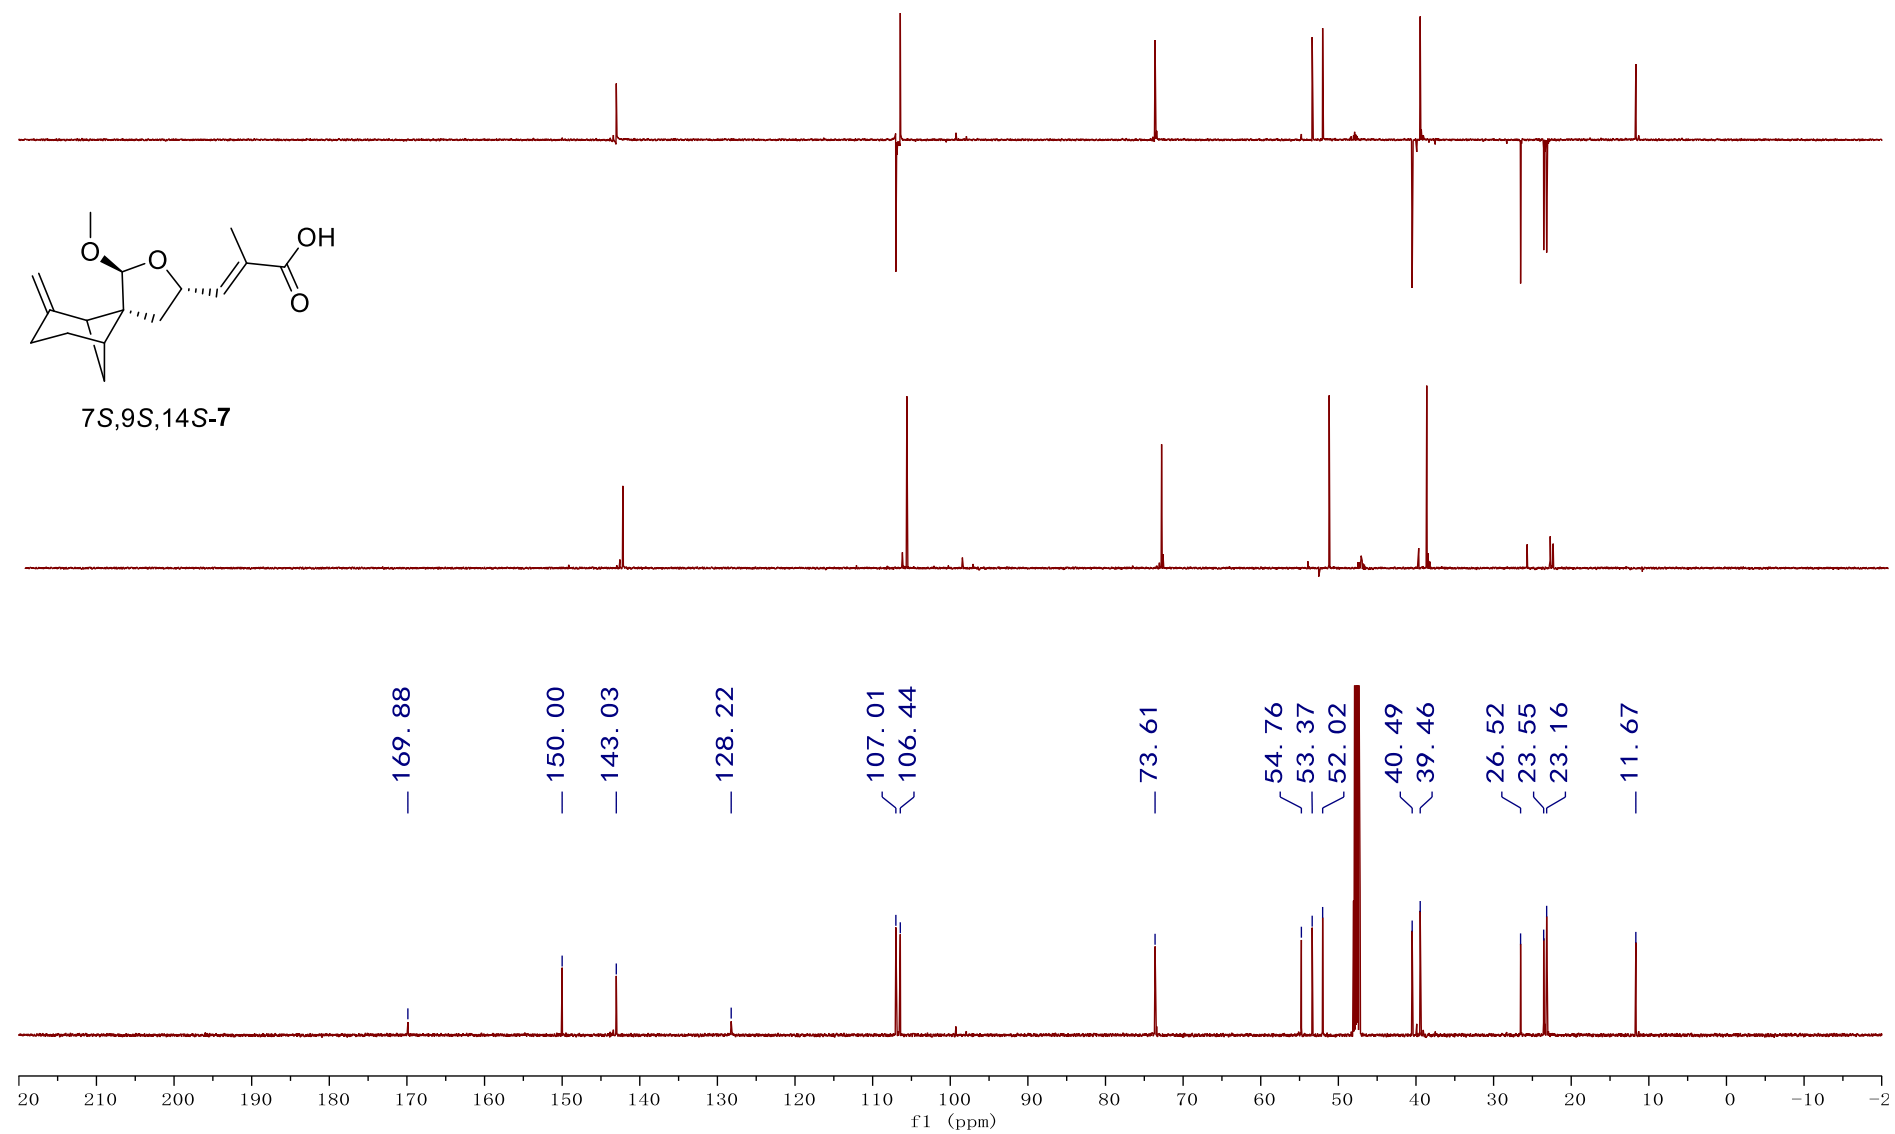

**Figure S68.** HSQC of compound **7*S*,9*S*,14*S*-7** in CD<sub>3</sub>OD

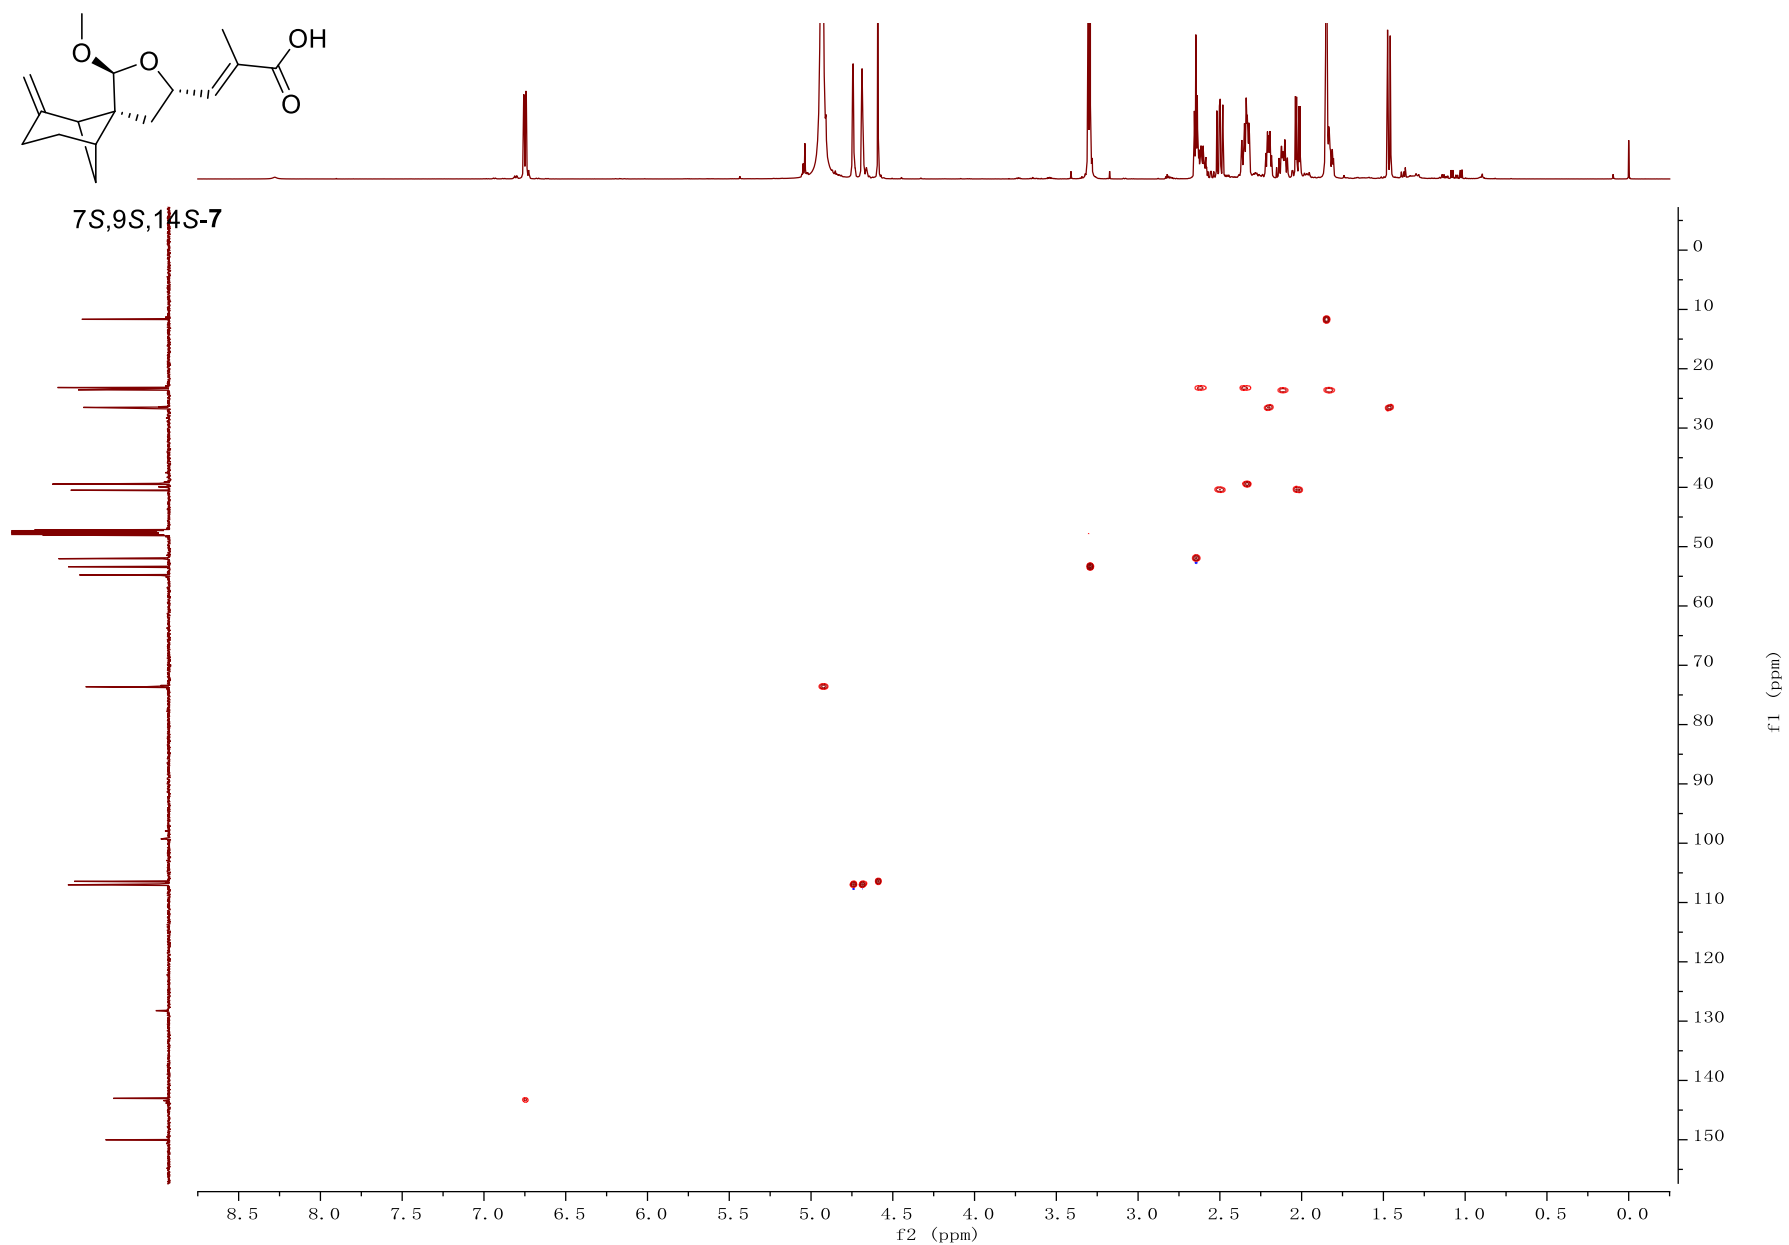



**Figure S69.** HMBC of compound 7*S*,9*S*,14*S*-**7** in CD<sub>3</sub>OD

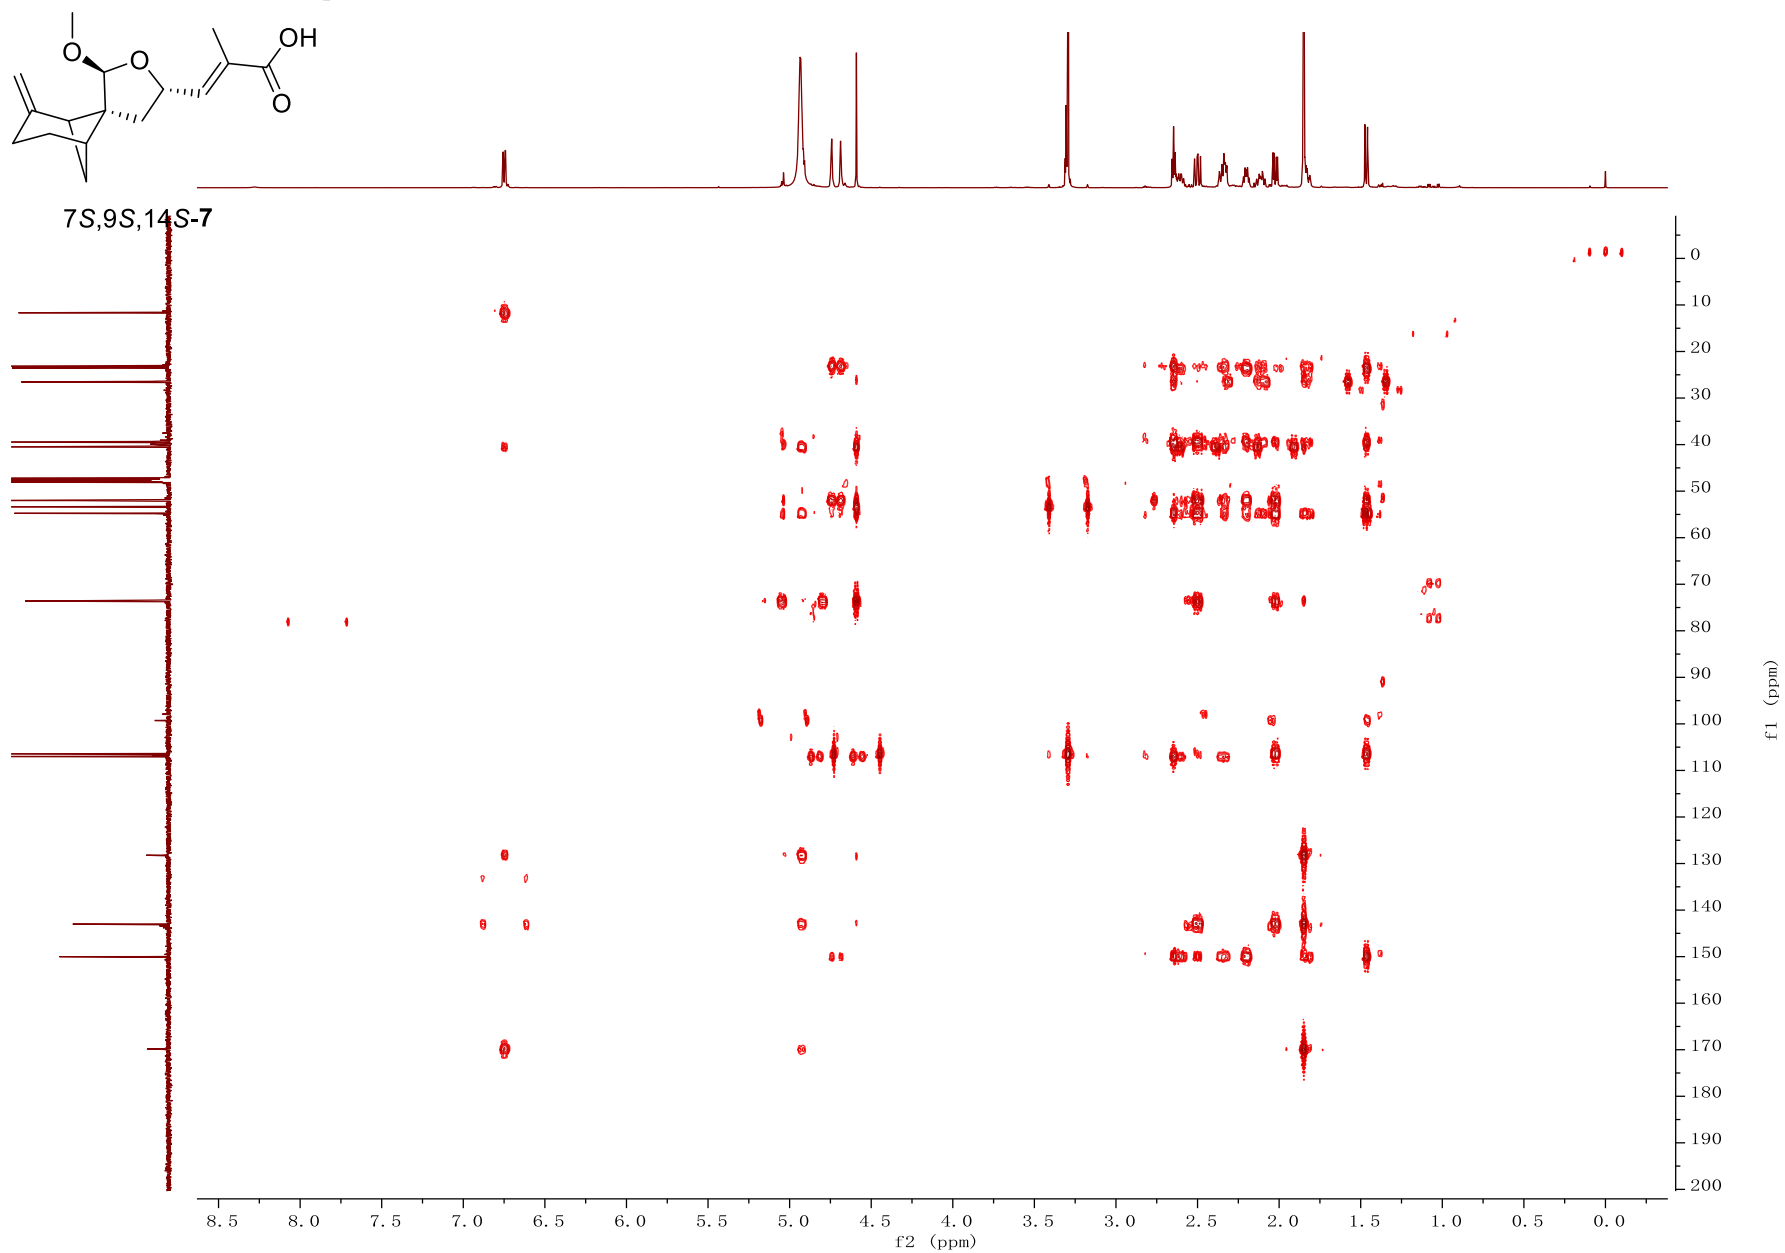

**Figure S70.**  $^1\text{H}$ - $^1\text{H}$  COSY of compound **7S,9S,14S-7** in  $\text{CD}_3\text{OD}$

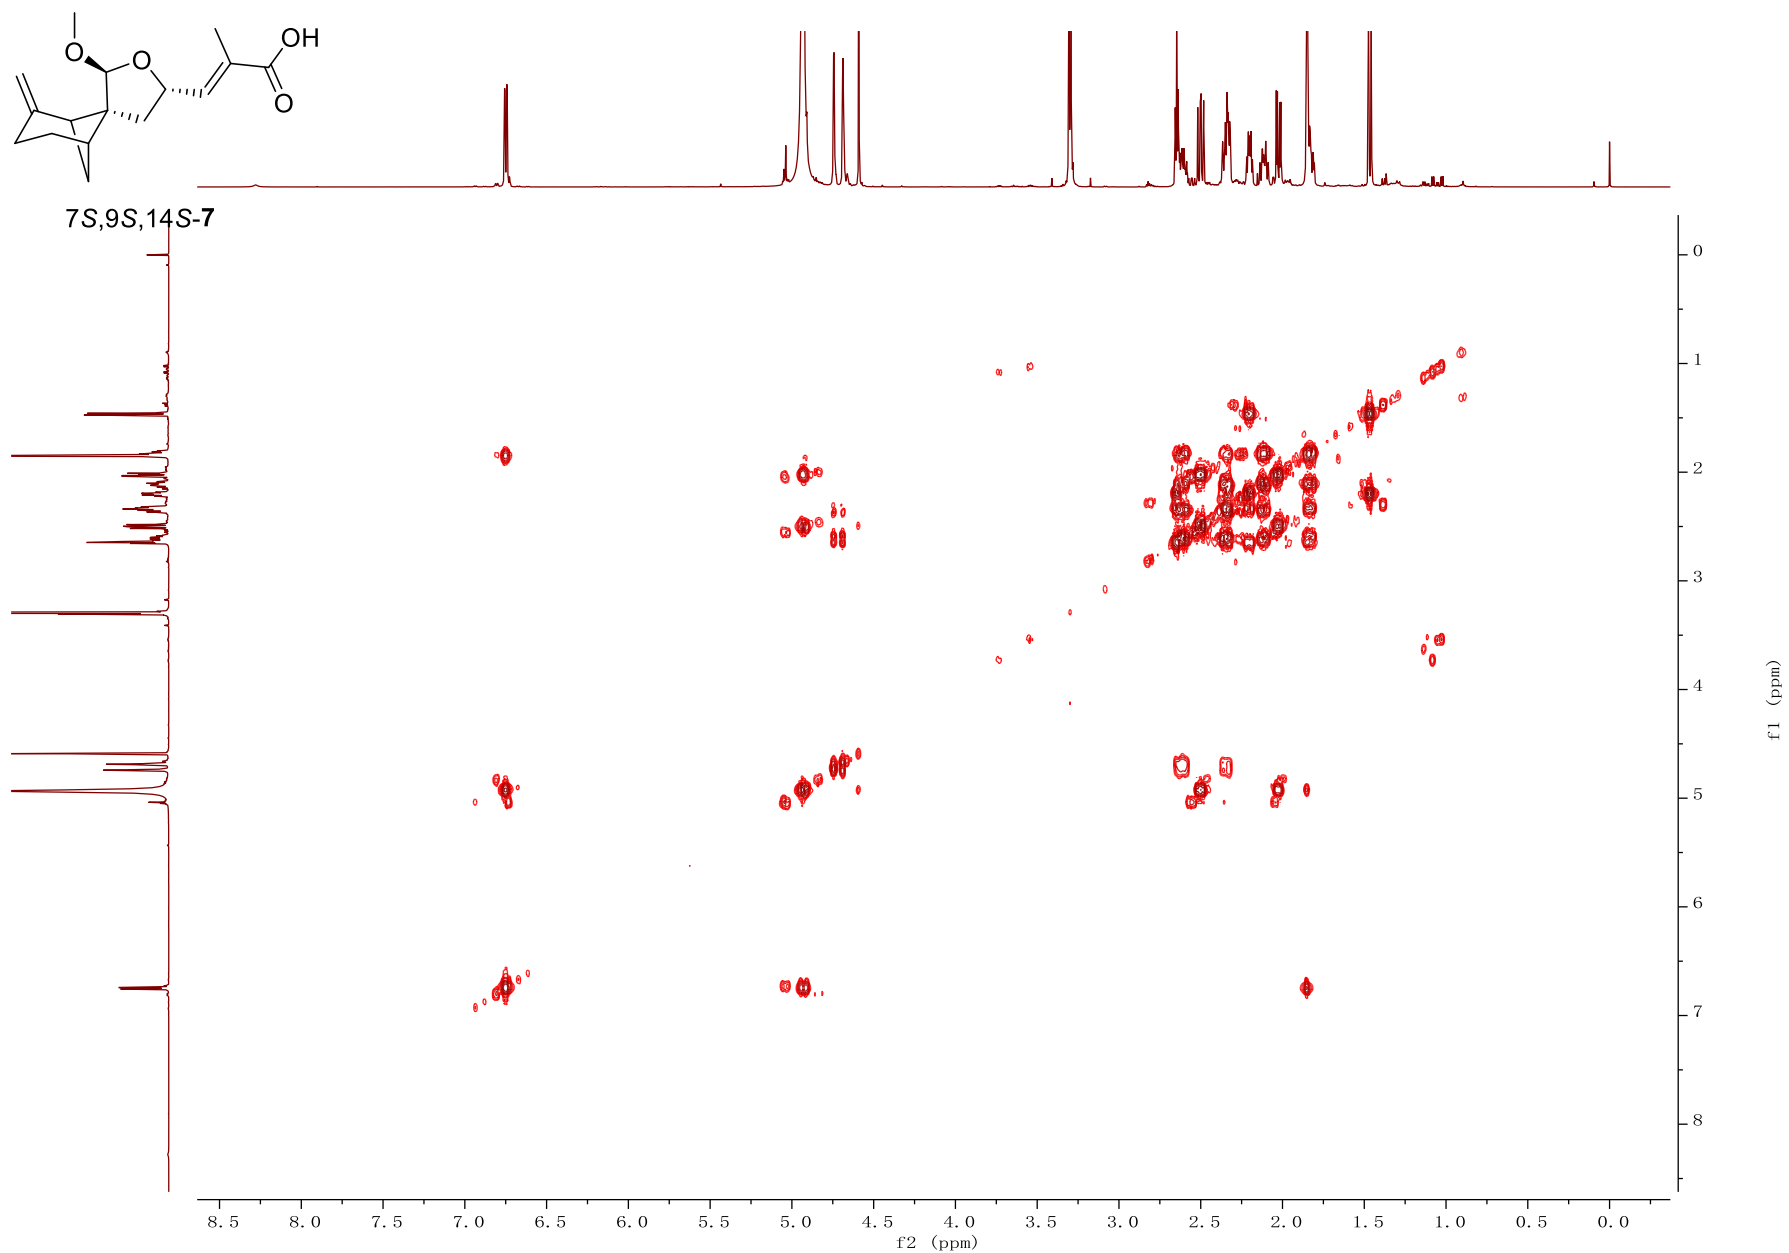

**Figure S71.** ROESY of compound **7*S*,9*S*,14*S*-7** in CD<sub>3</sub>OD

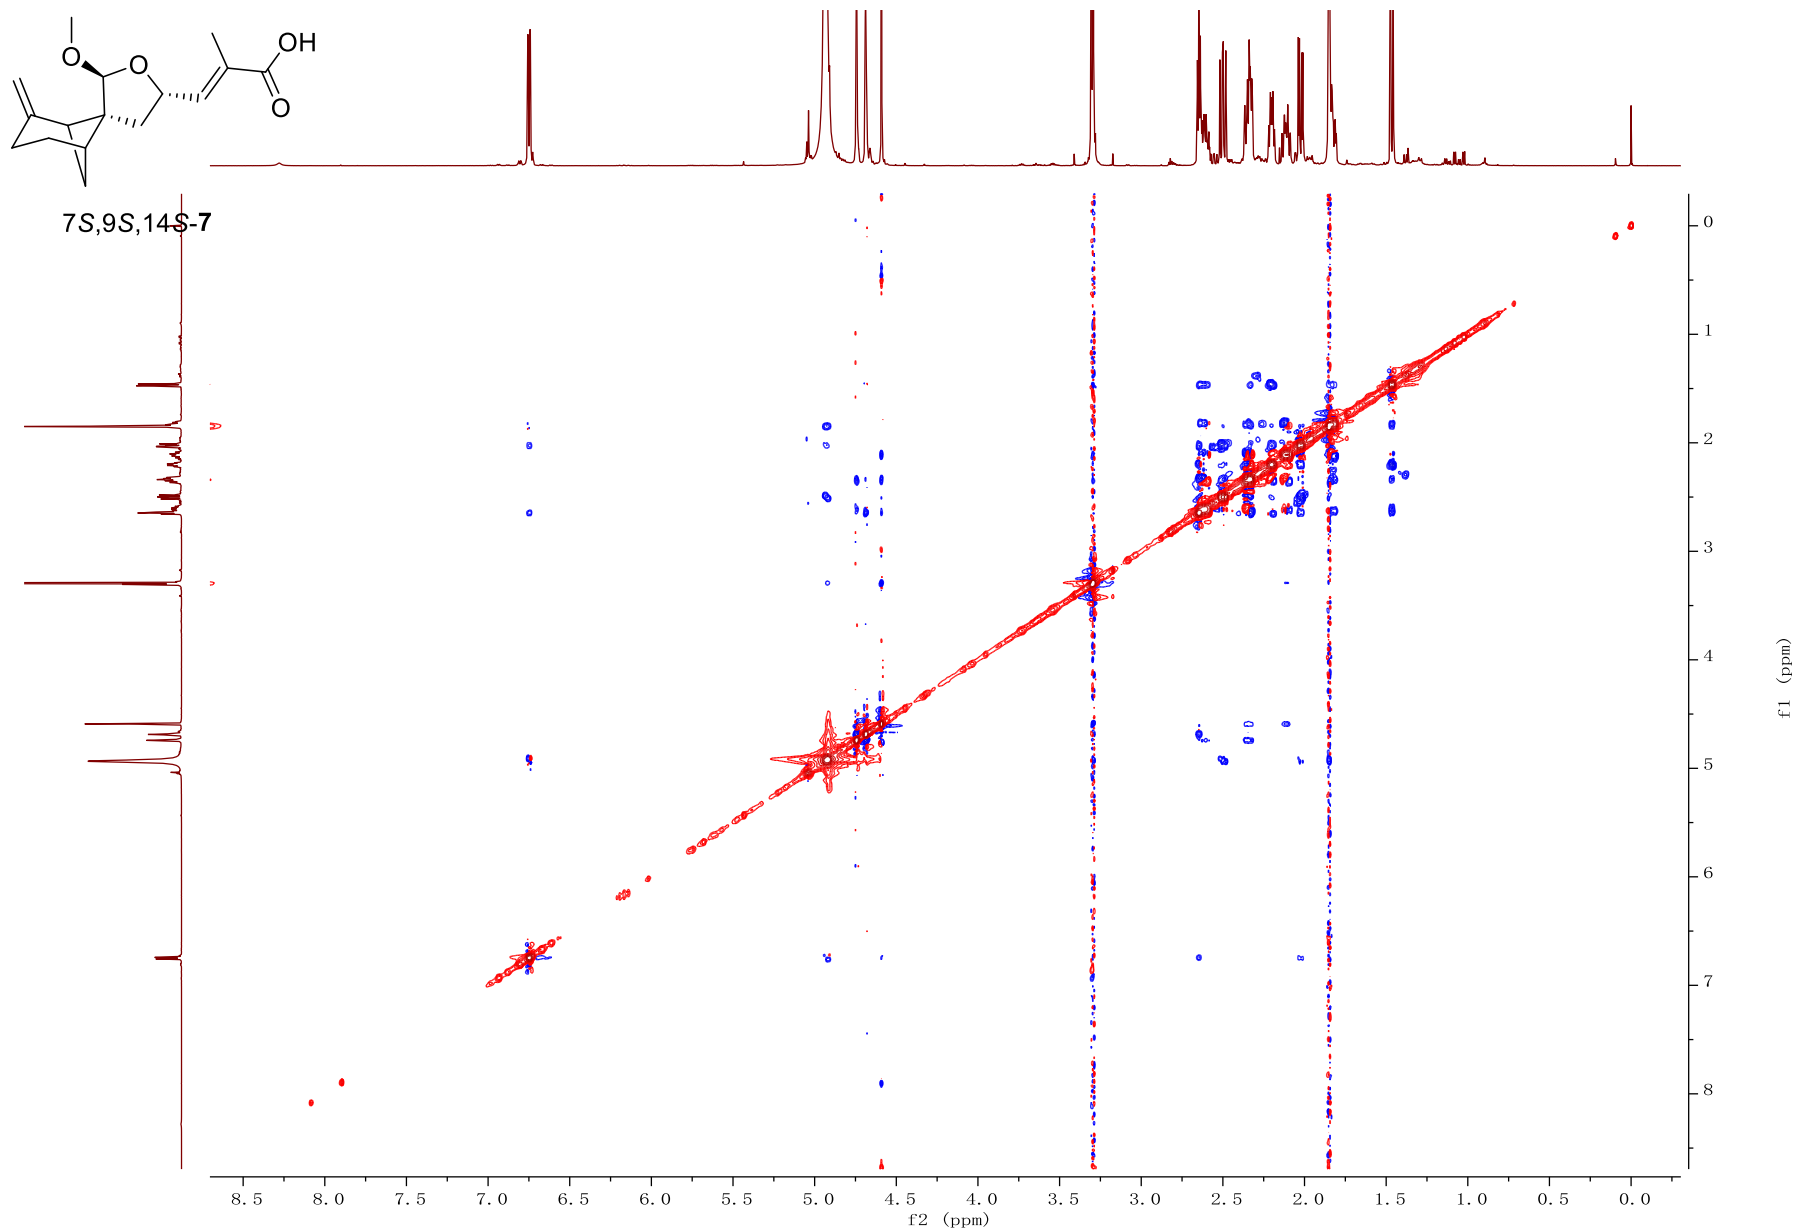

**Figure S72.** HR-ESIMS of compound 7*S*,9*S*,14*S*-7

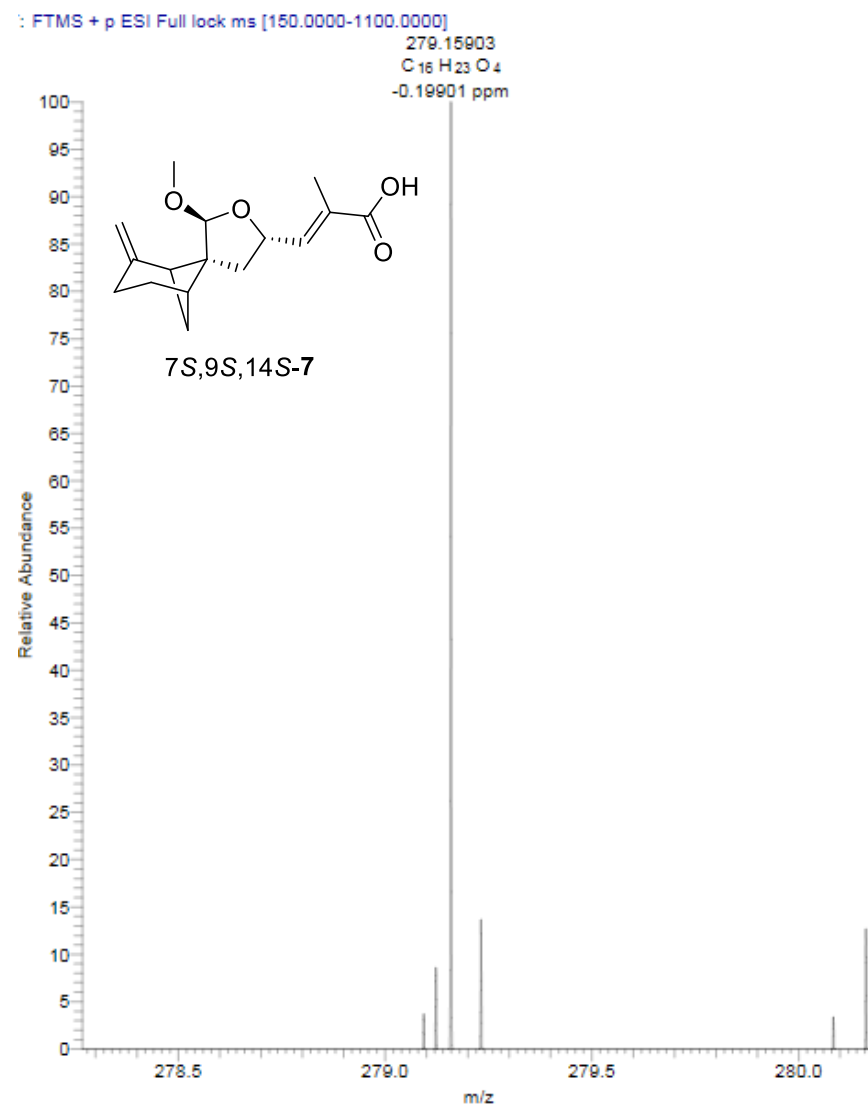

## Section S15. NMR and MS spectra for 7*S*,9*S*,14*R*-8

**Figure S73.**  $^1\text{H}$  NMR of compound 7*S*,9*S*,14*R*-8 in  $\text{CD}_3\text{OD}$

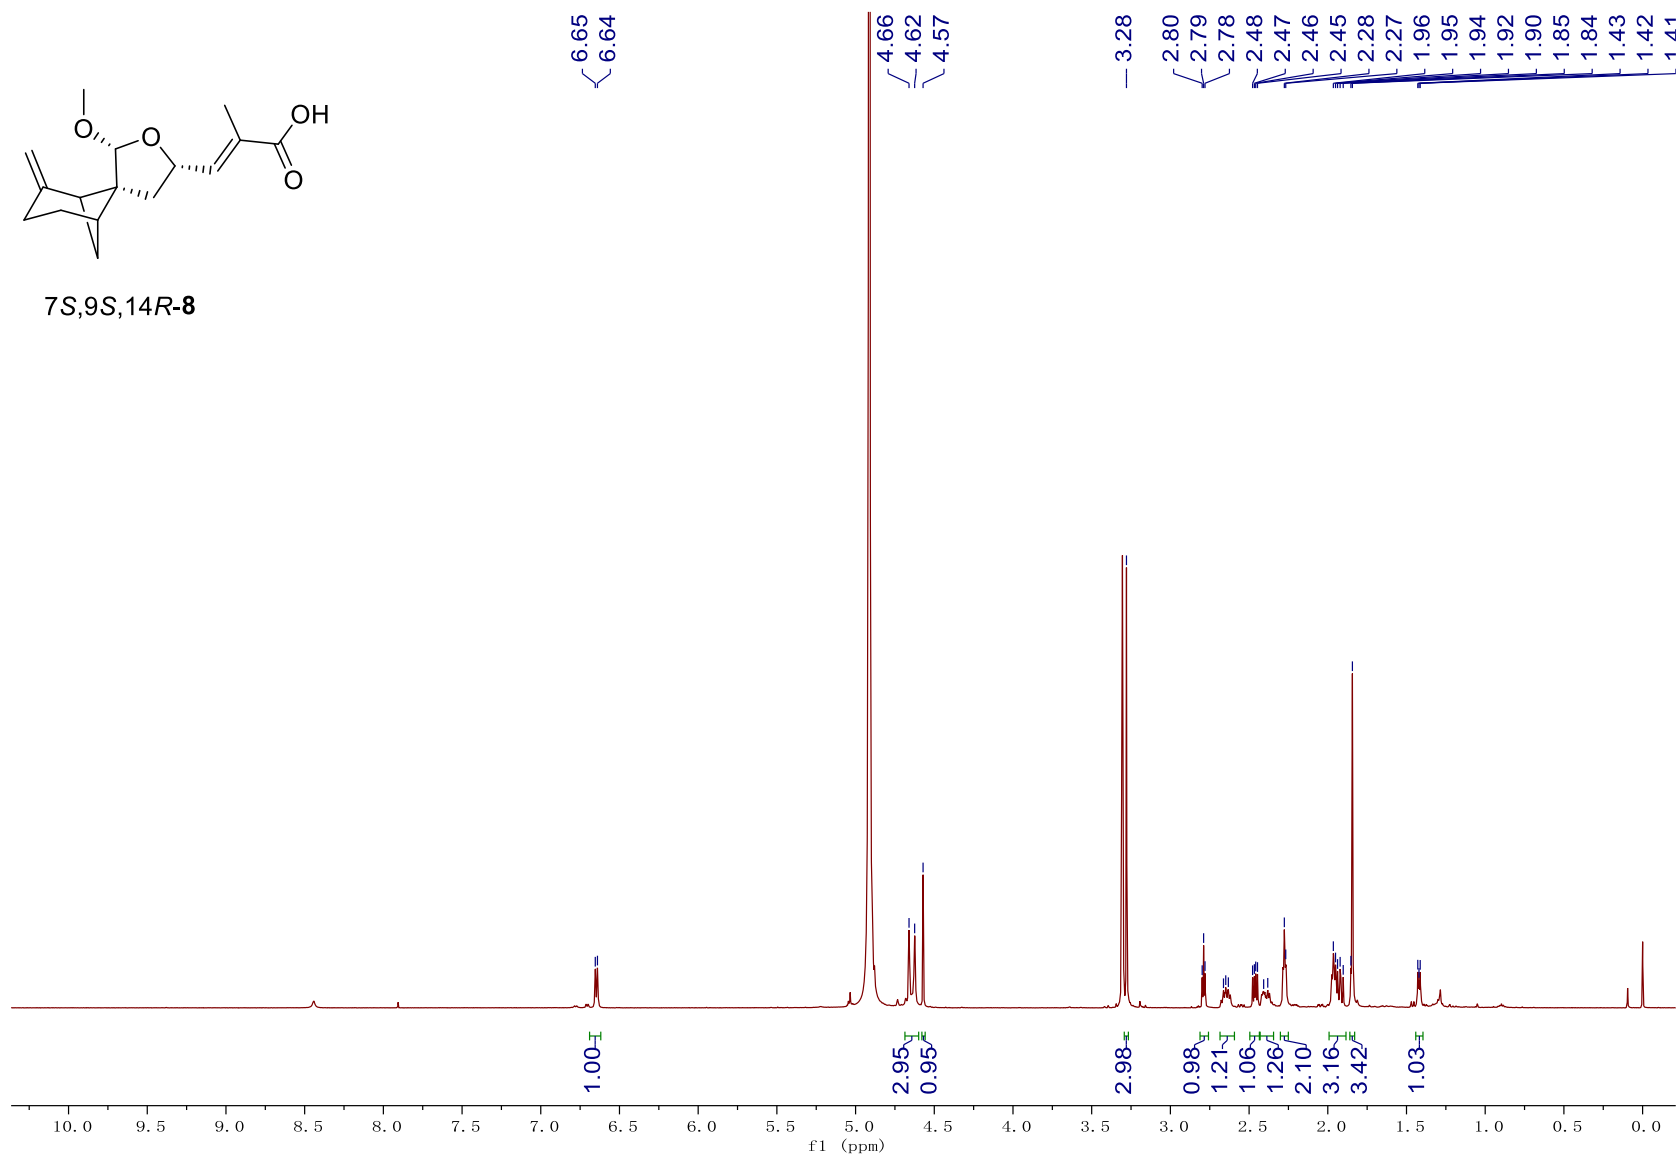

**Figure S74.**  $^{13}\text{C}$  NMR and DEPT of compound 7*S*,9*S*,14*R*-**8** in  $\text{CD}_3\text{OD}$

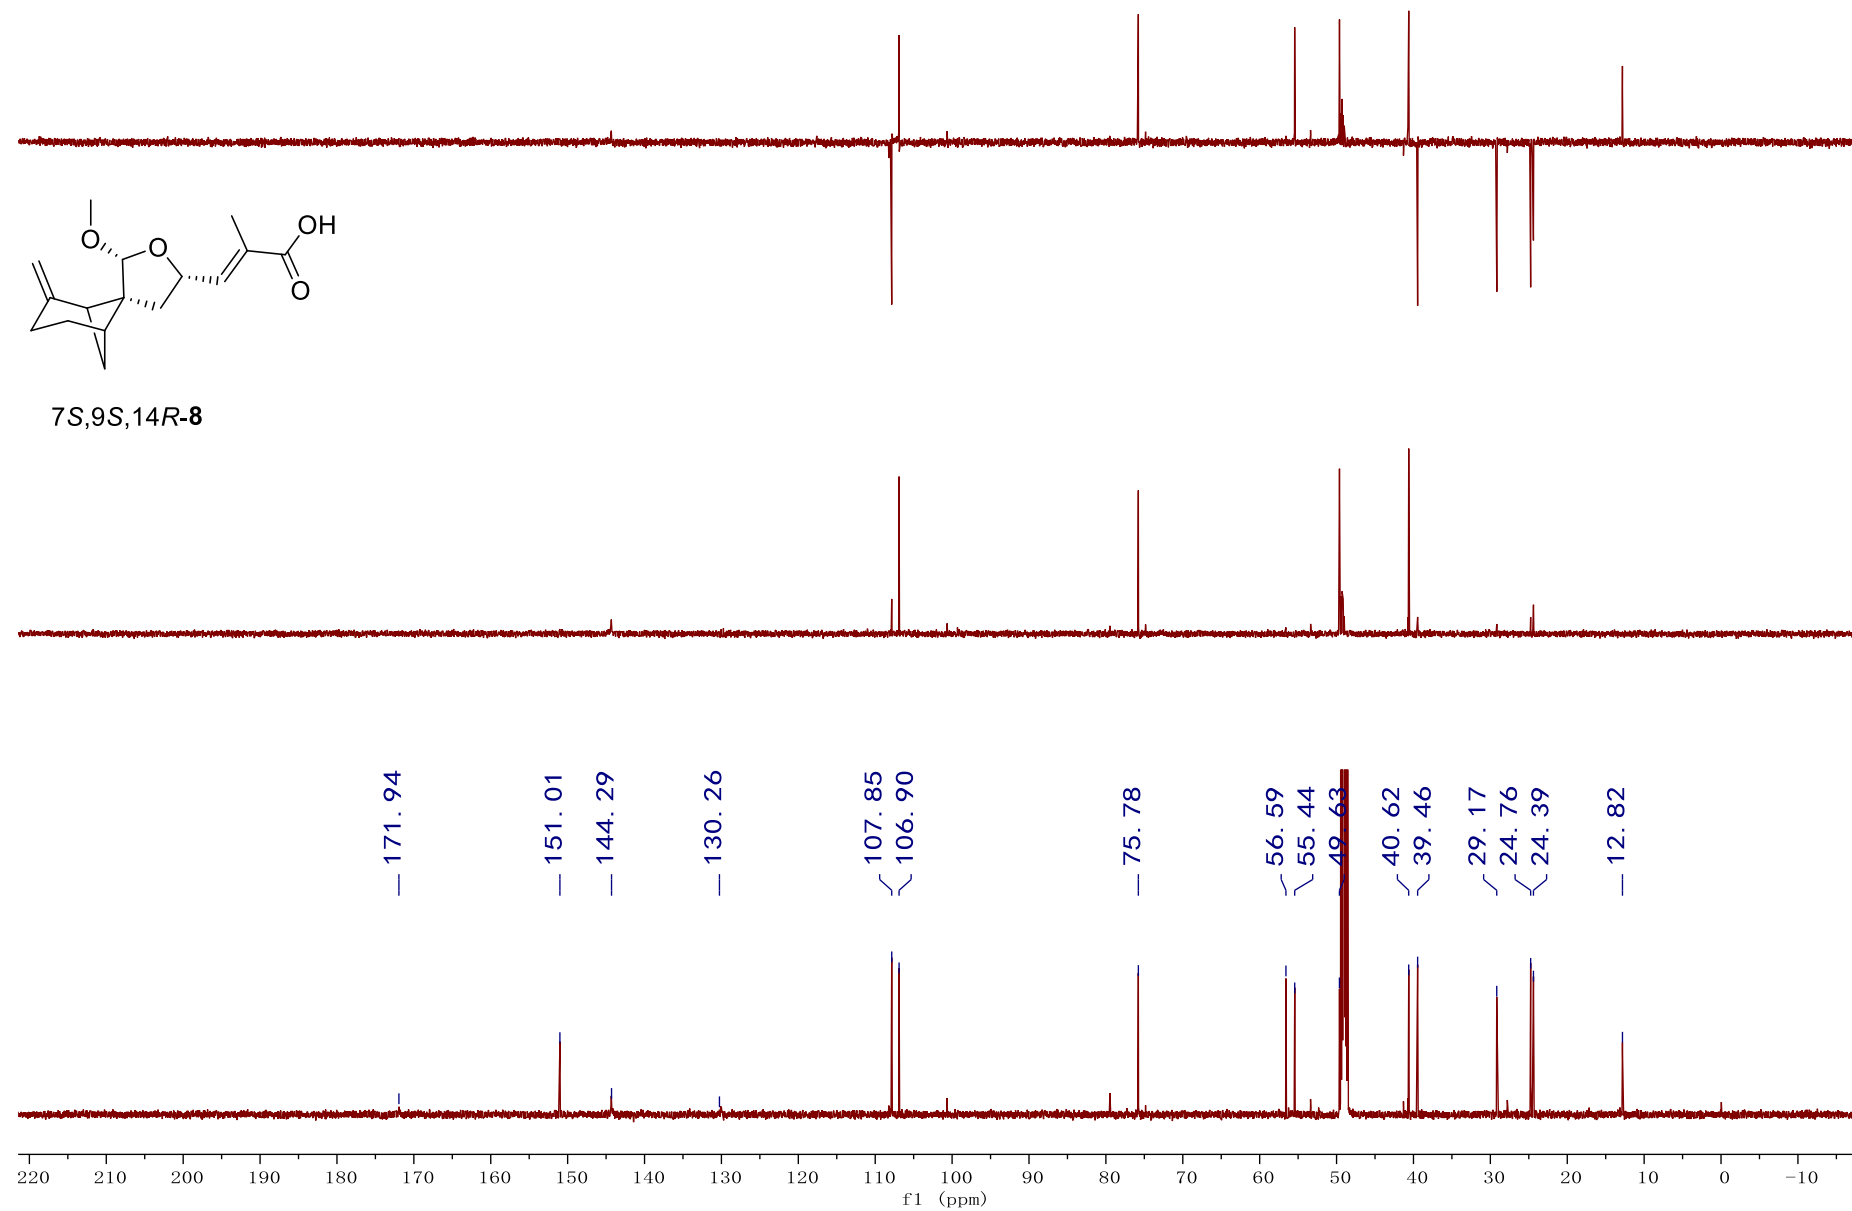

**Figure S75.** HSQC of compound **7*S*,9*S*,14*R*-8** in CD<sub>3</sub>OD

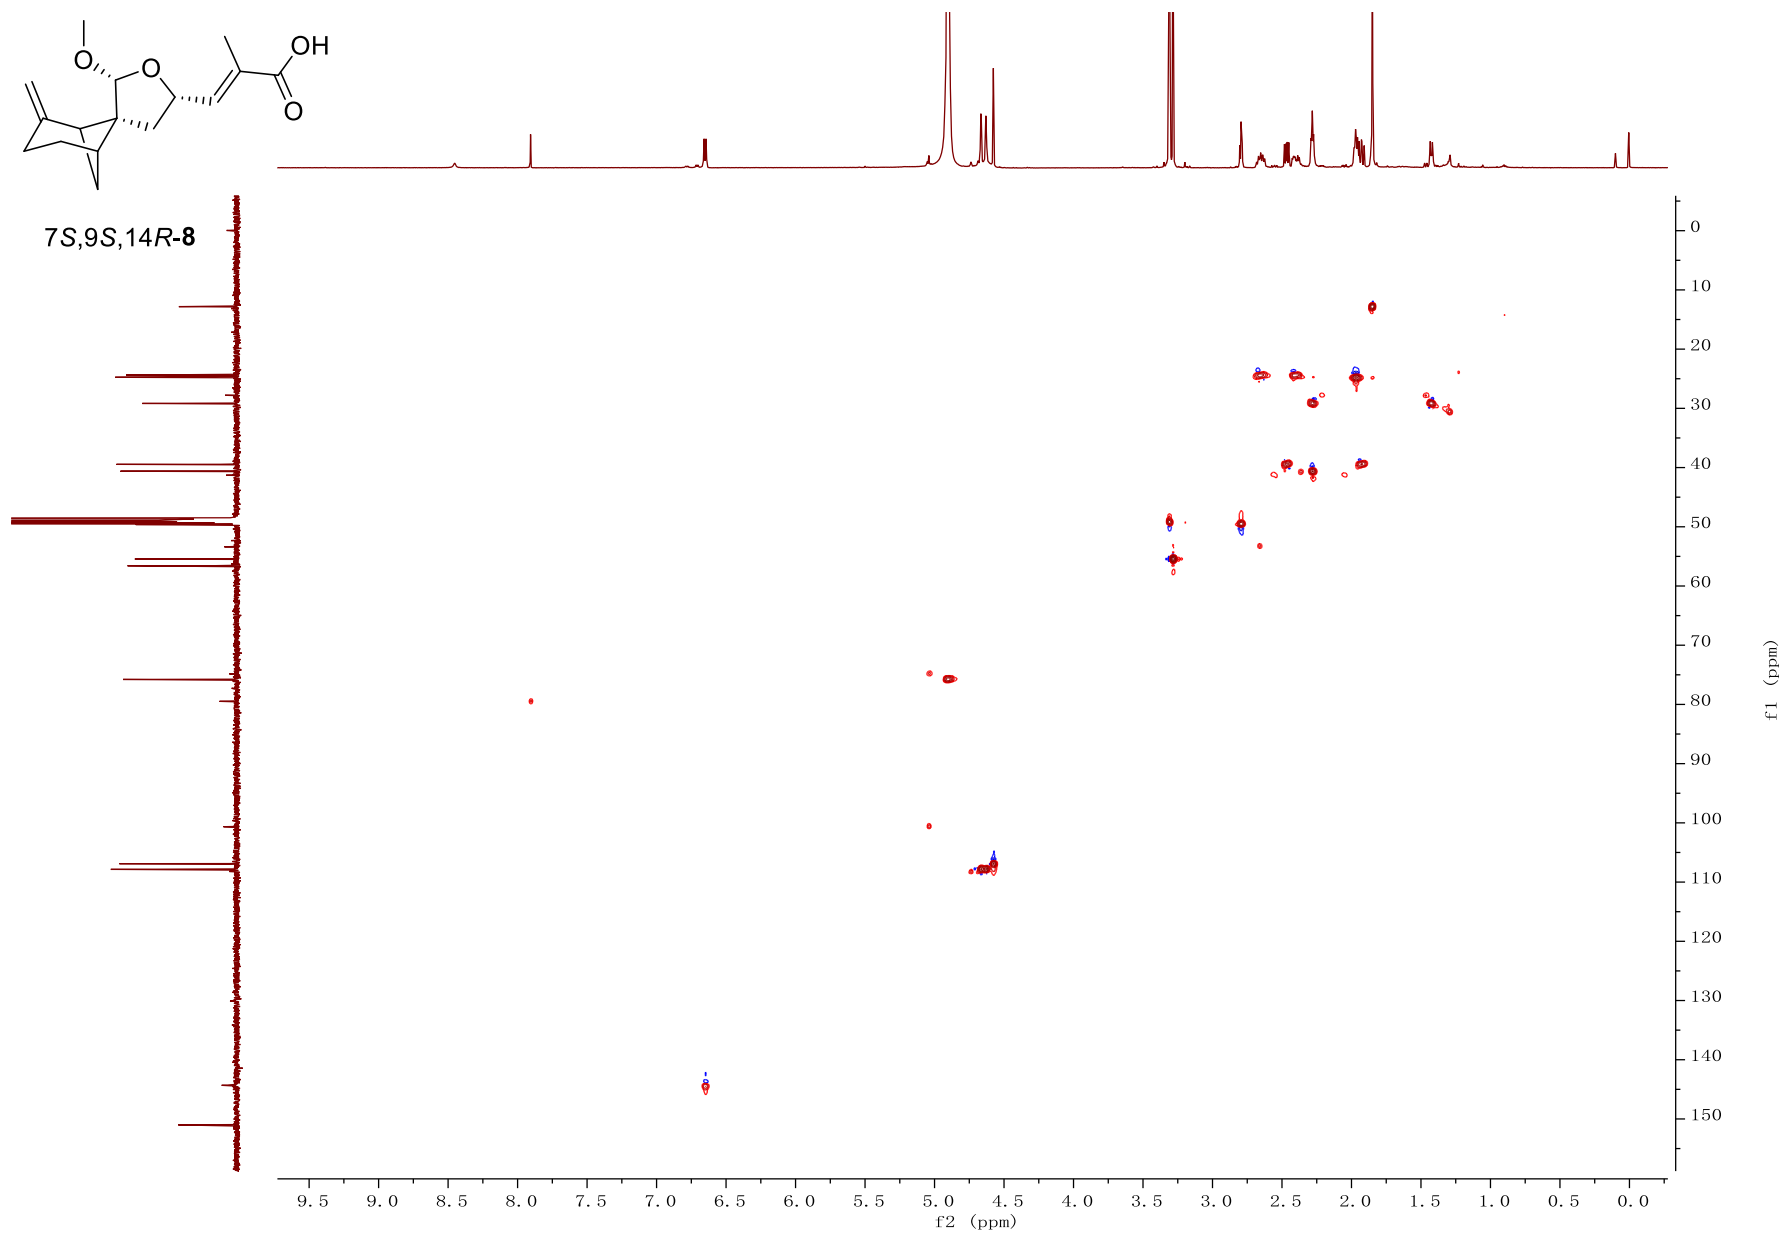

**Figure S76.** HMBC of compound **7S,9S,14R-8** in CD<sub>3</sub>OD

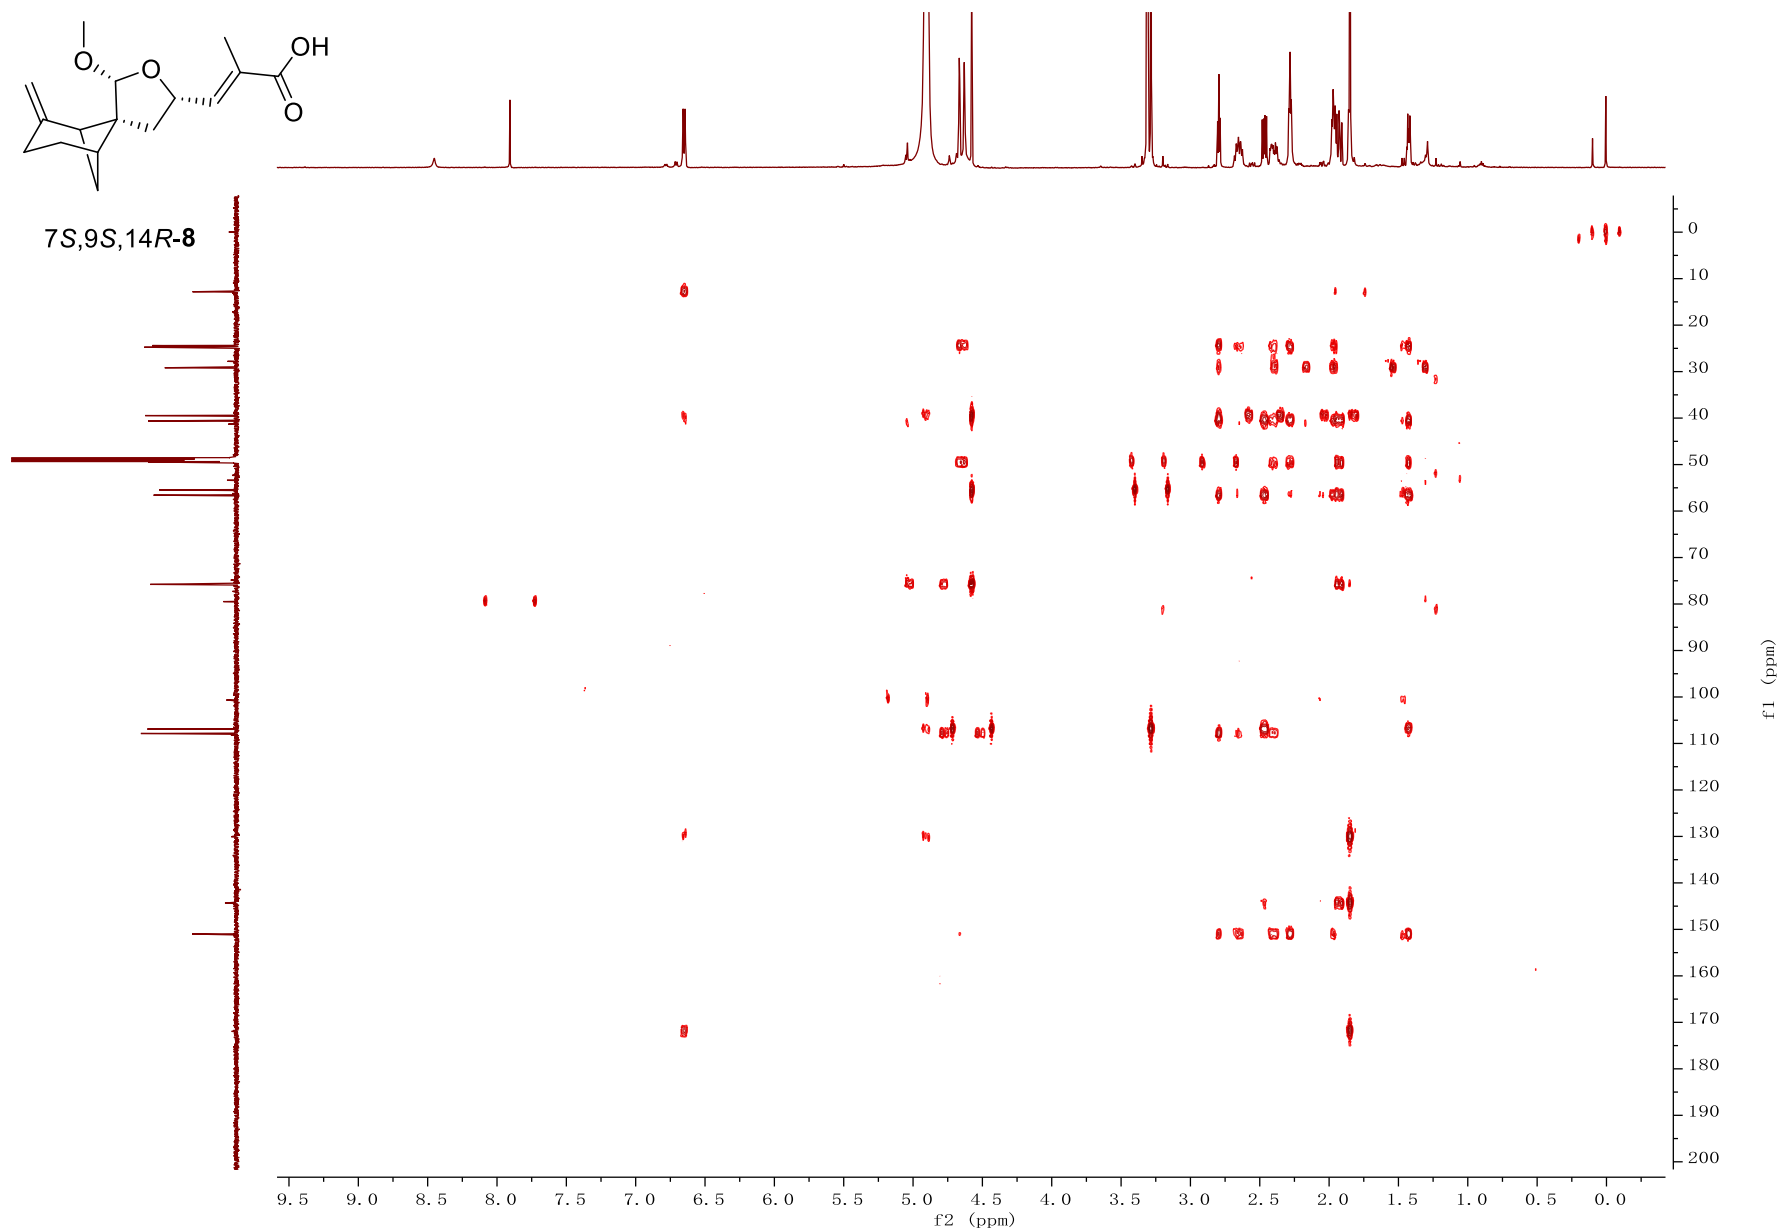



**Figure S77.**  $^1\text{H}$ - $^1\text{H}$  COSY of compound **7S,9S,14R-8** in  $\text{CD}_3\text{OD}$

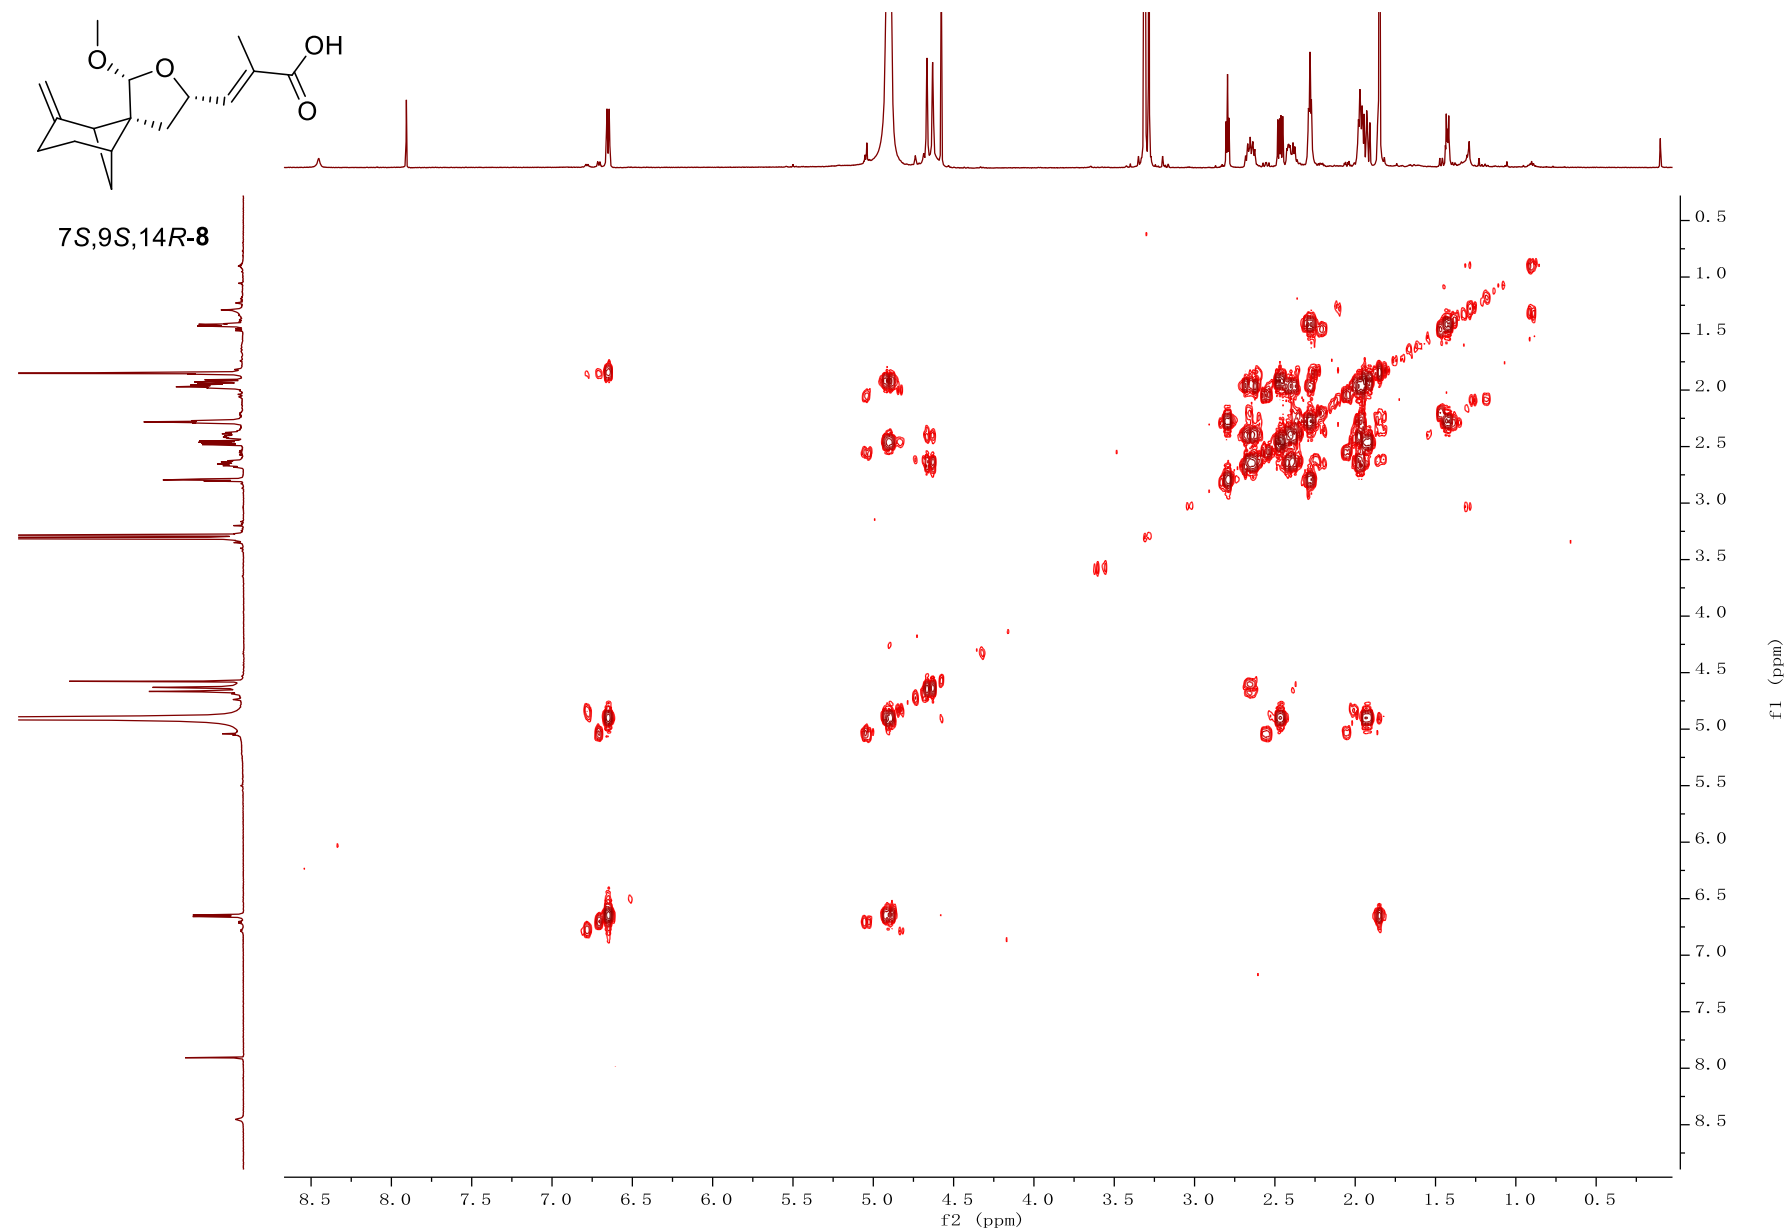

**Figure S78.** ROESY of compound **7*S*,9*S*,14*R*-8** in CD<sub>3</sub>OD

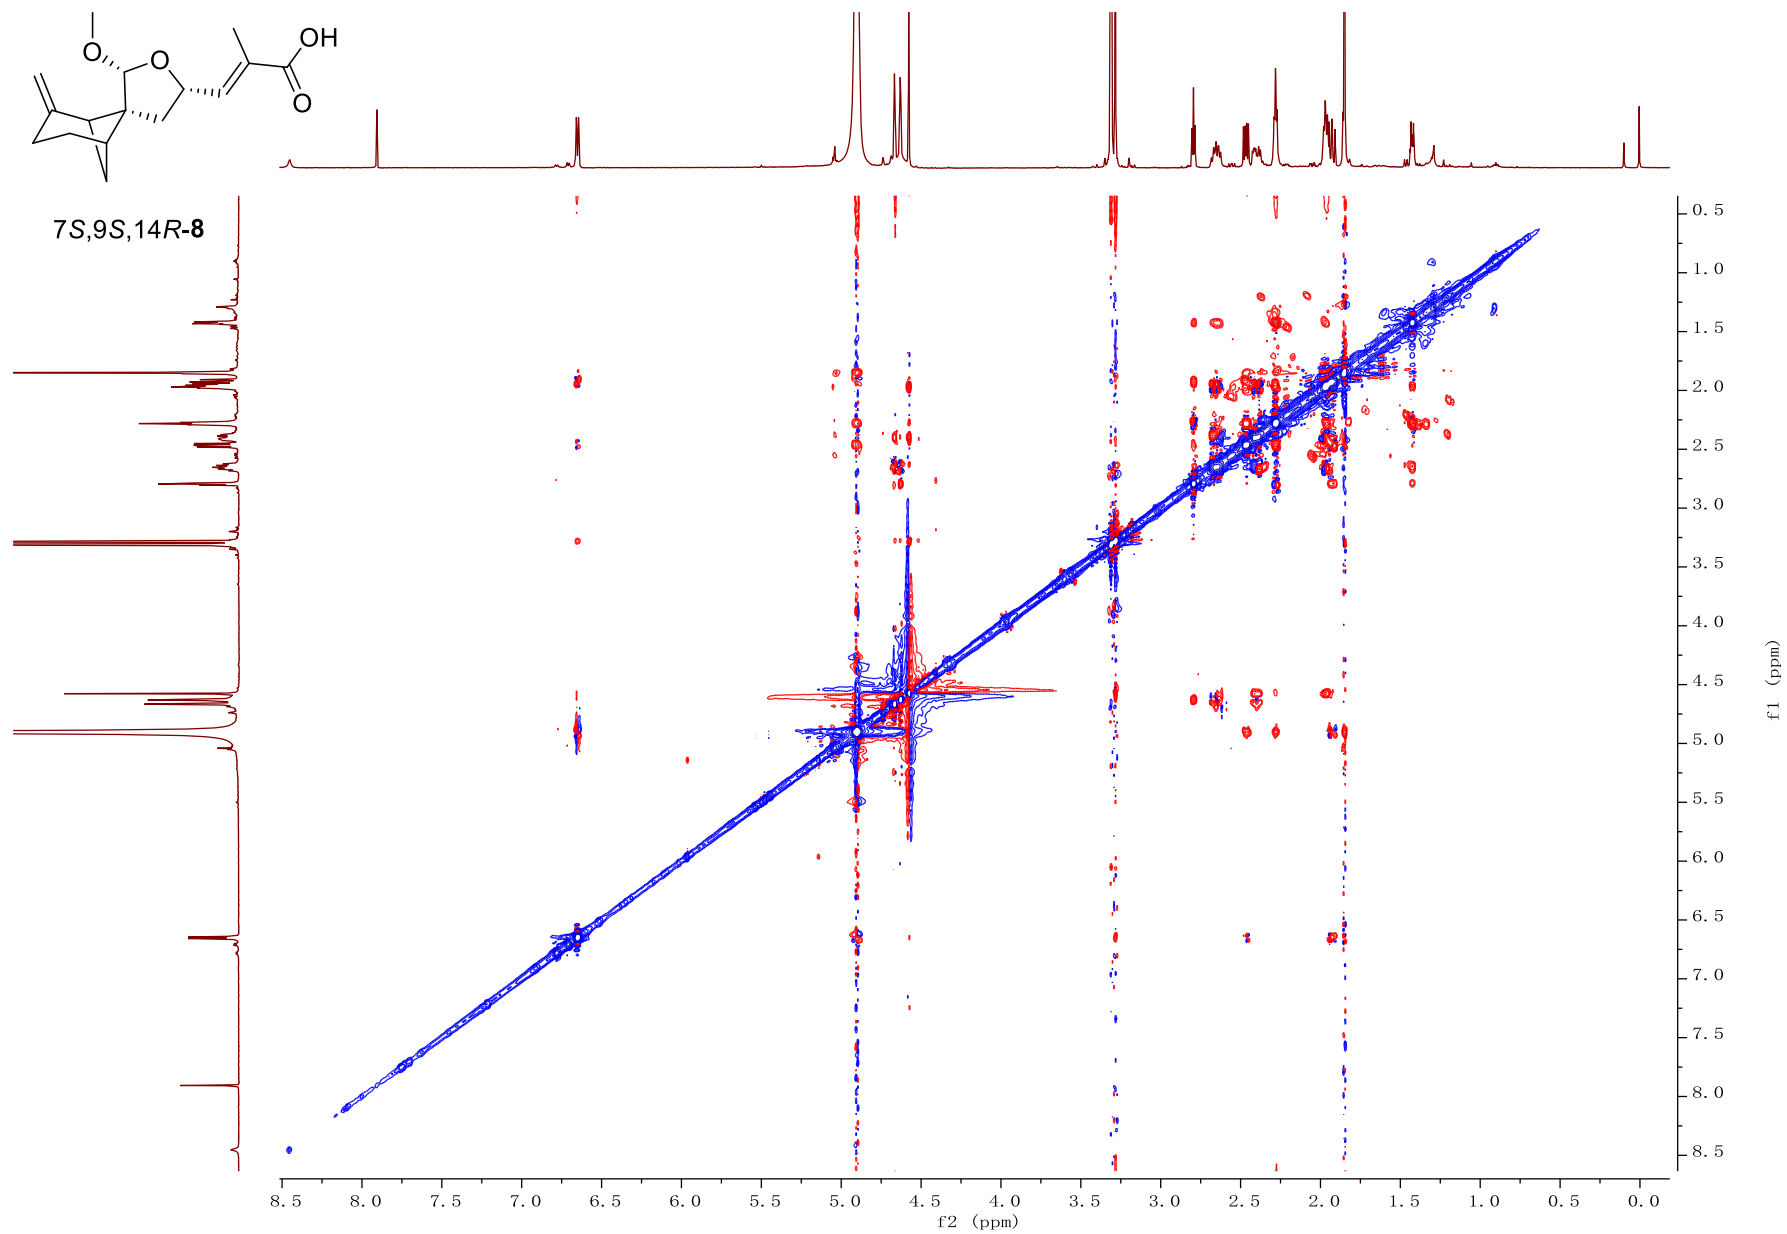

**Figure S79.** HR-ESIMS of compound **7S,9S,14R-8**

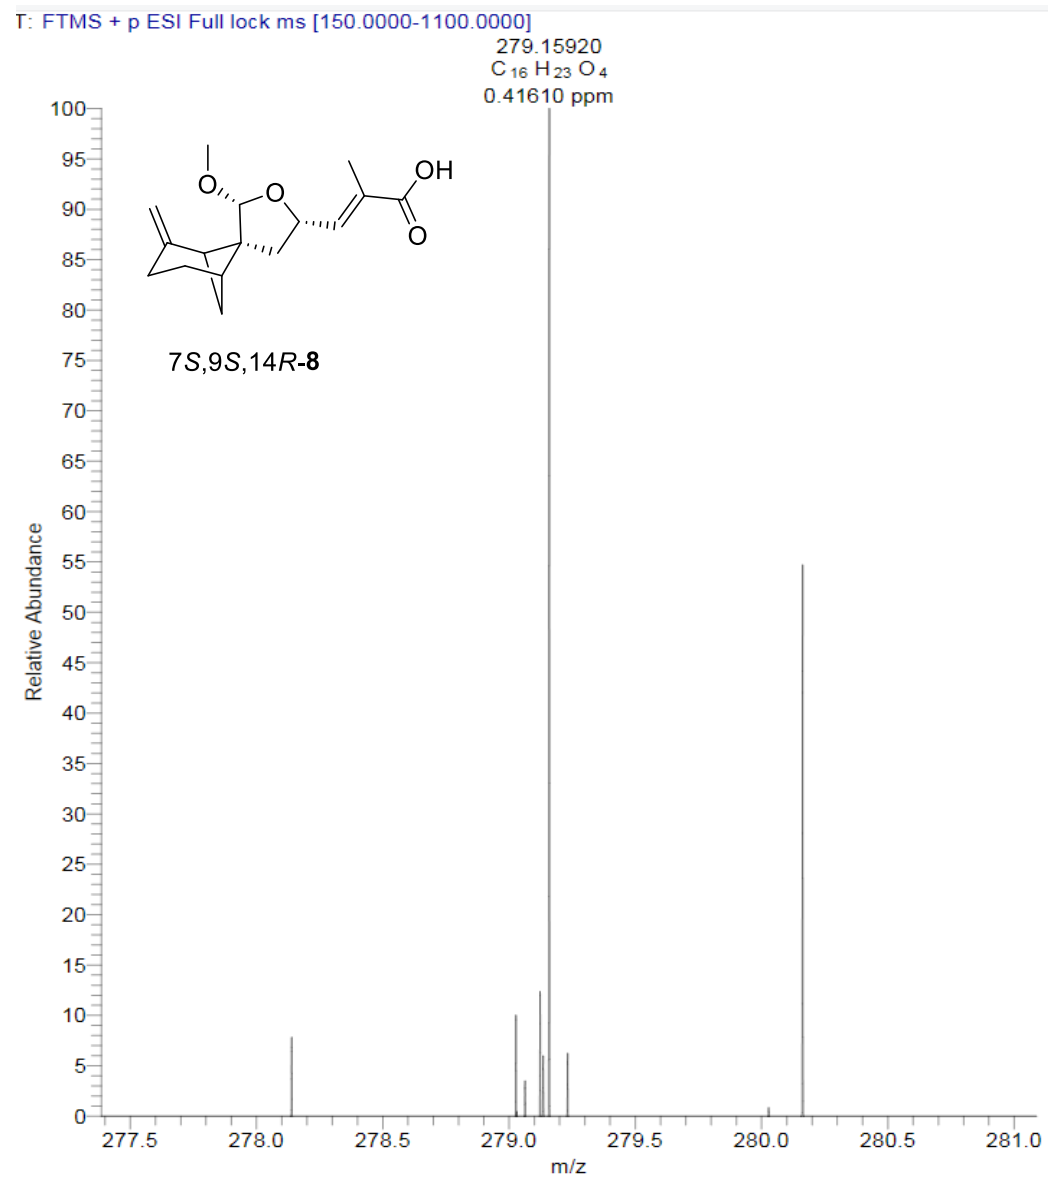

## Section S16. NMR and MS spectra for 9

Figure S80.  $^1\text{H}$  NMR of compound **9** in  $\text{CD}_3\text{OD}$

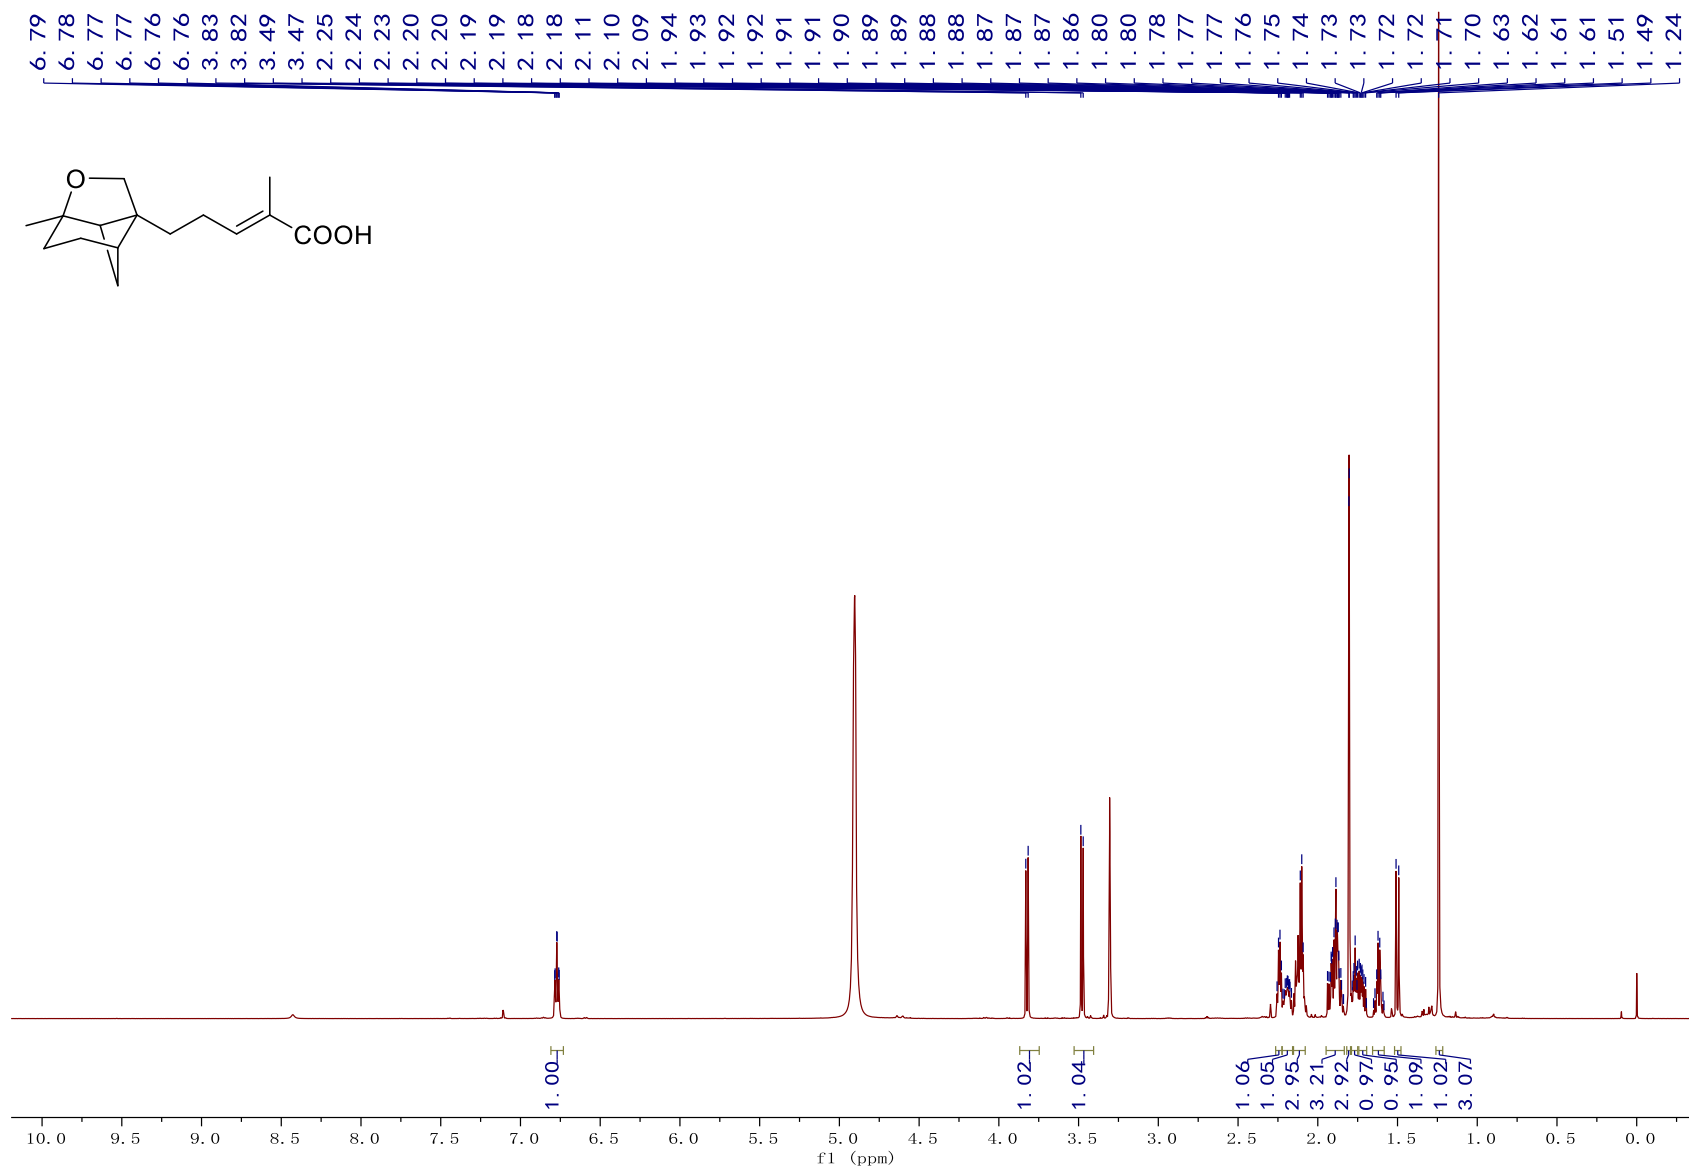

**Figure S81.**  $^{13}\text{C}$  NMR and DEPT of compound **9** in  $\text{CD}_3\text{OD}$

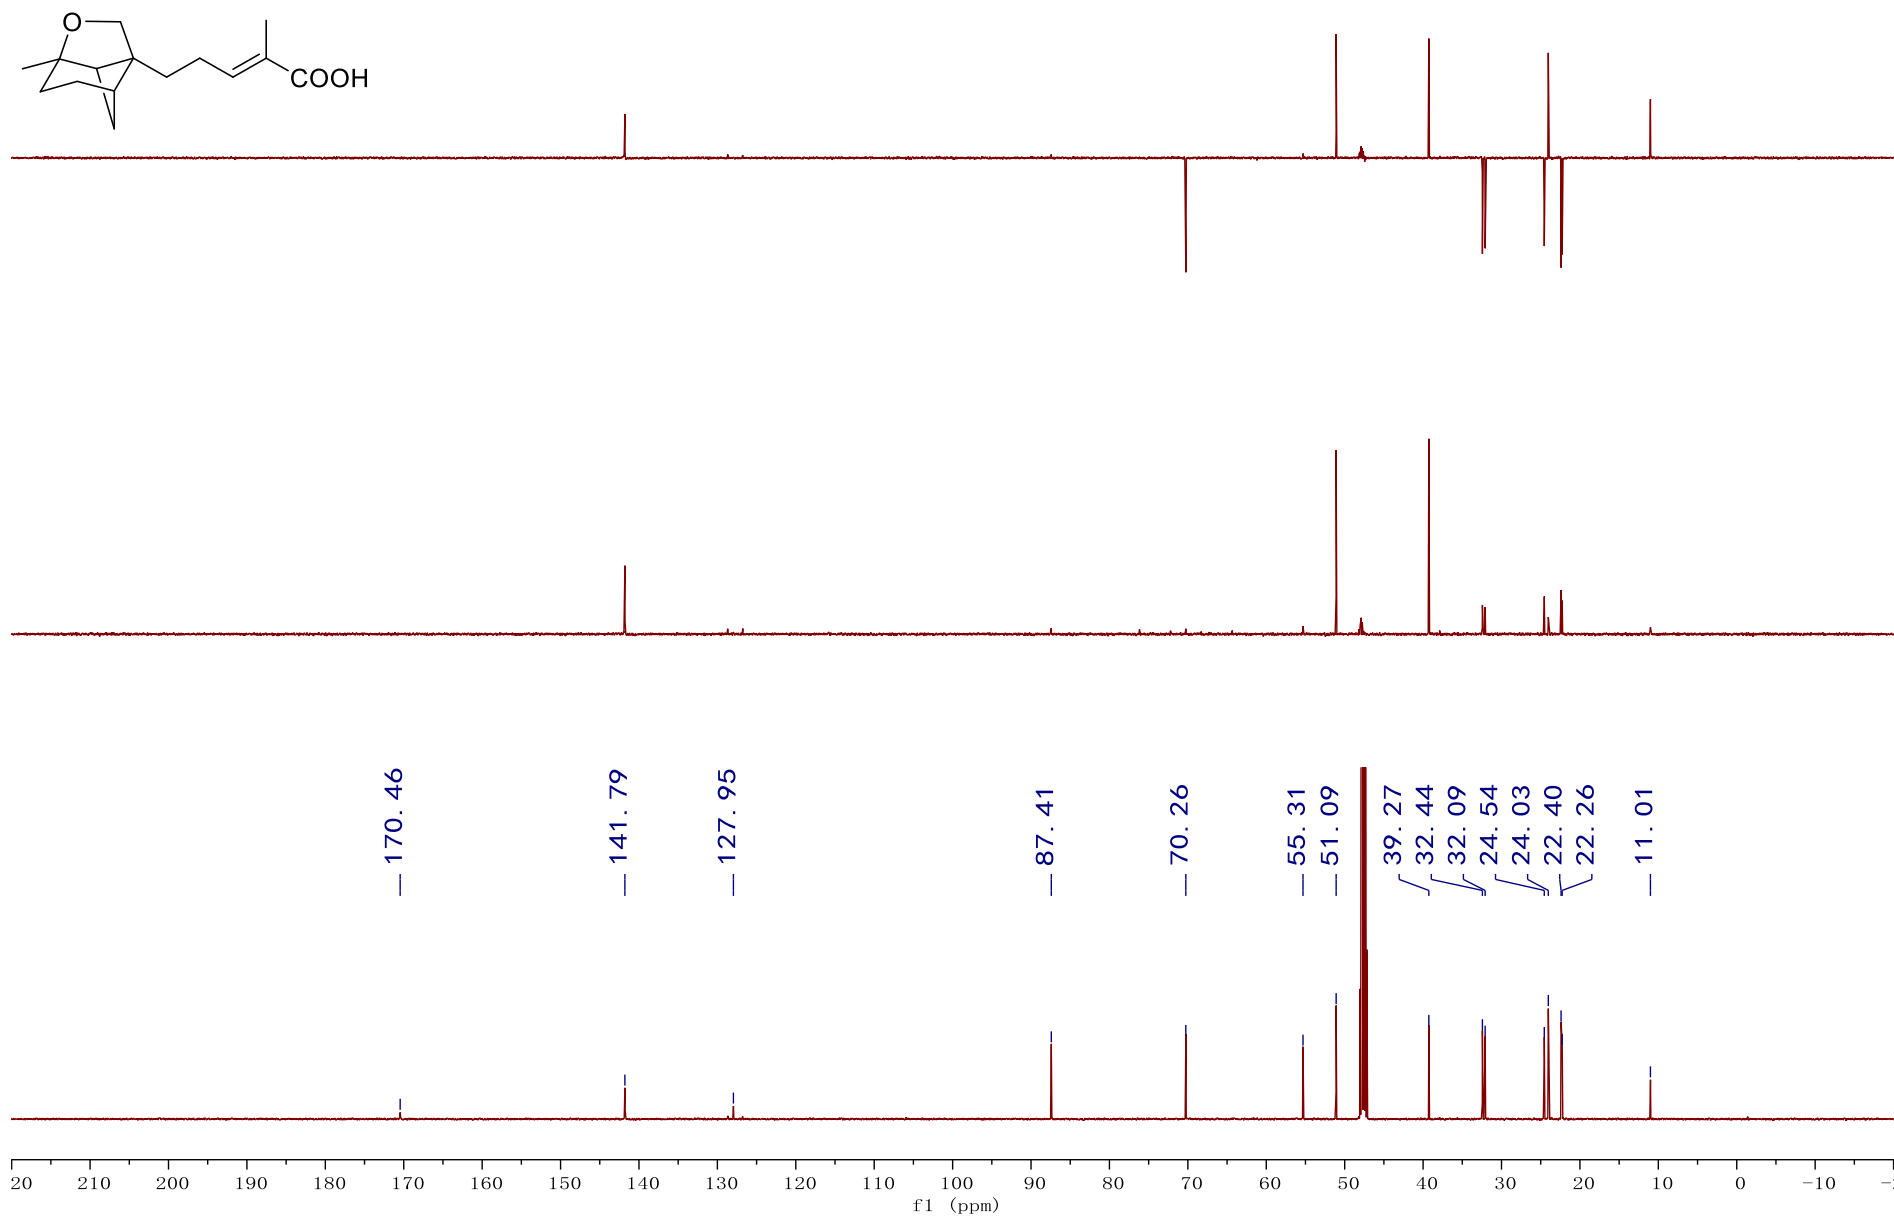

**Figure S82.** HSQC of compound **9** in CD<sub>3</sub>OD

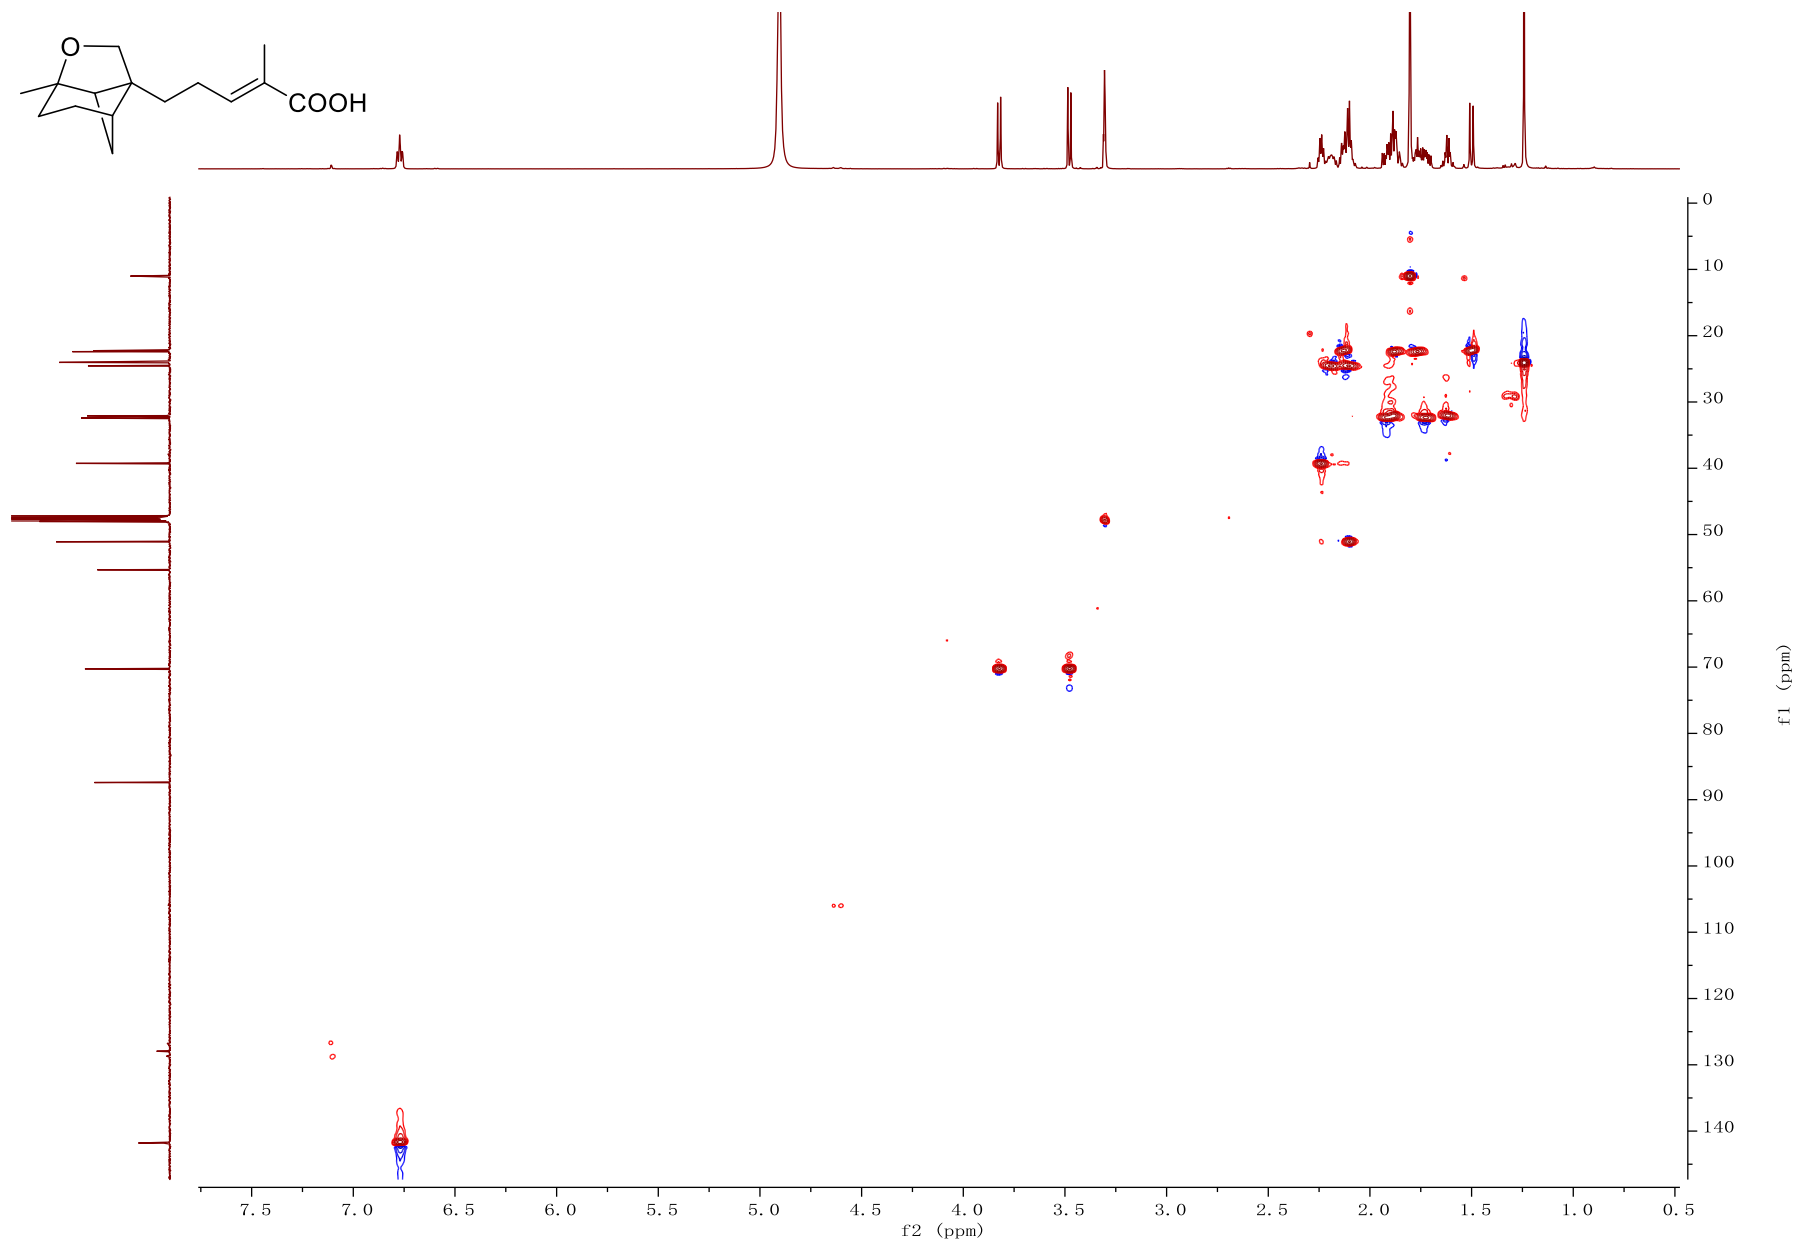

**Figure S83.** HMBC of compound **9** in CD<sub>3</sub>OD

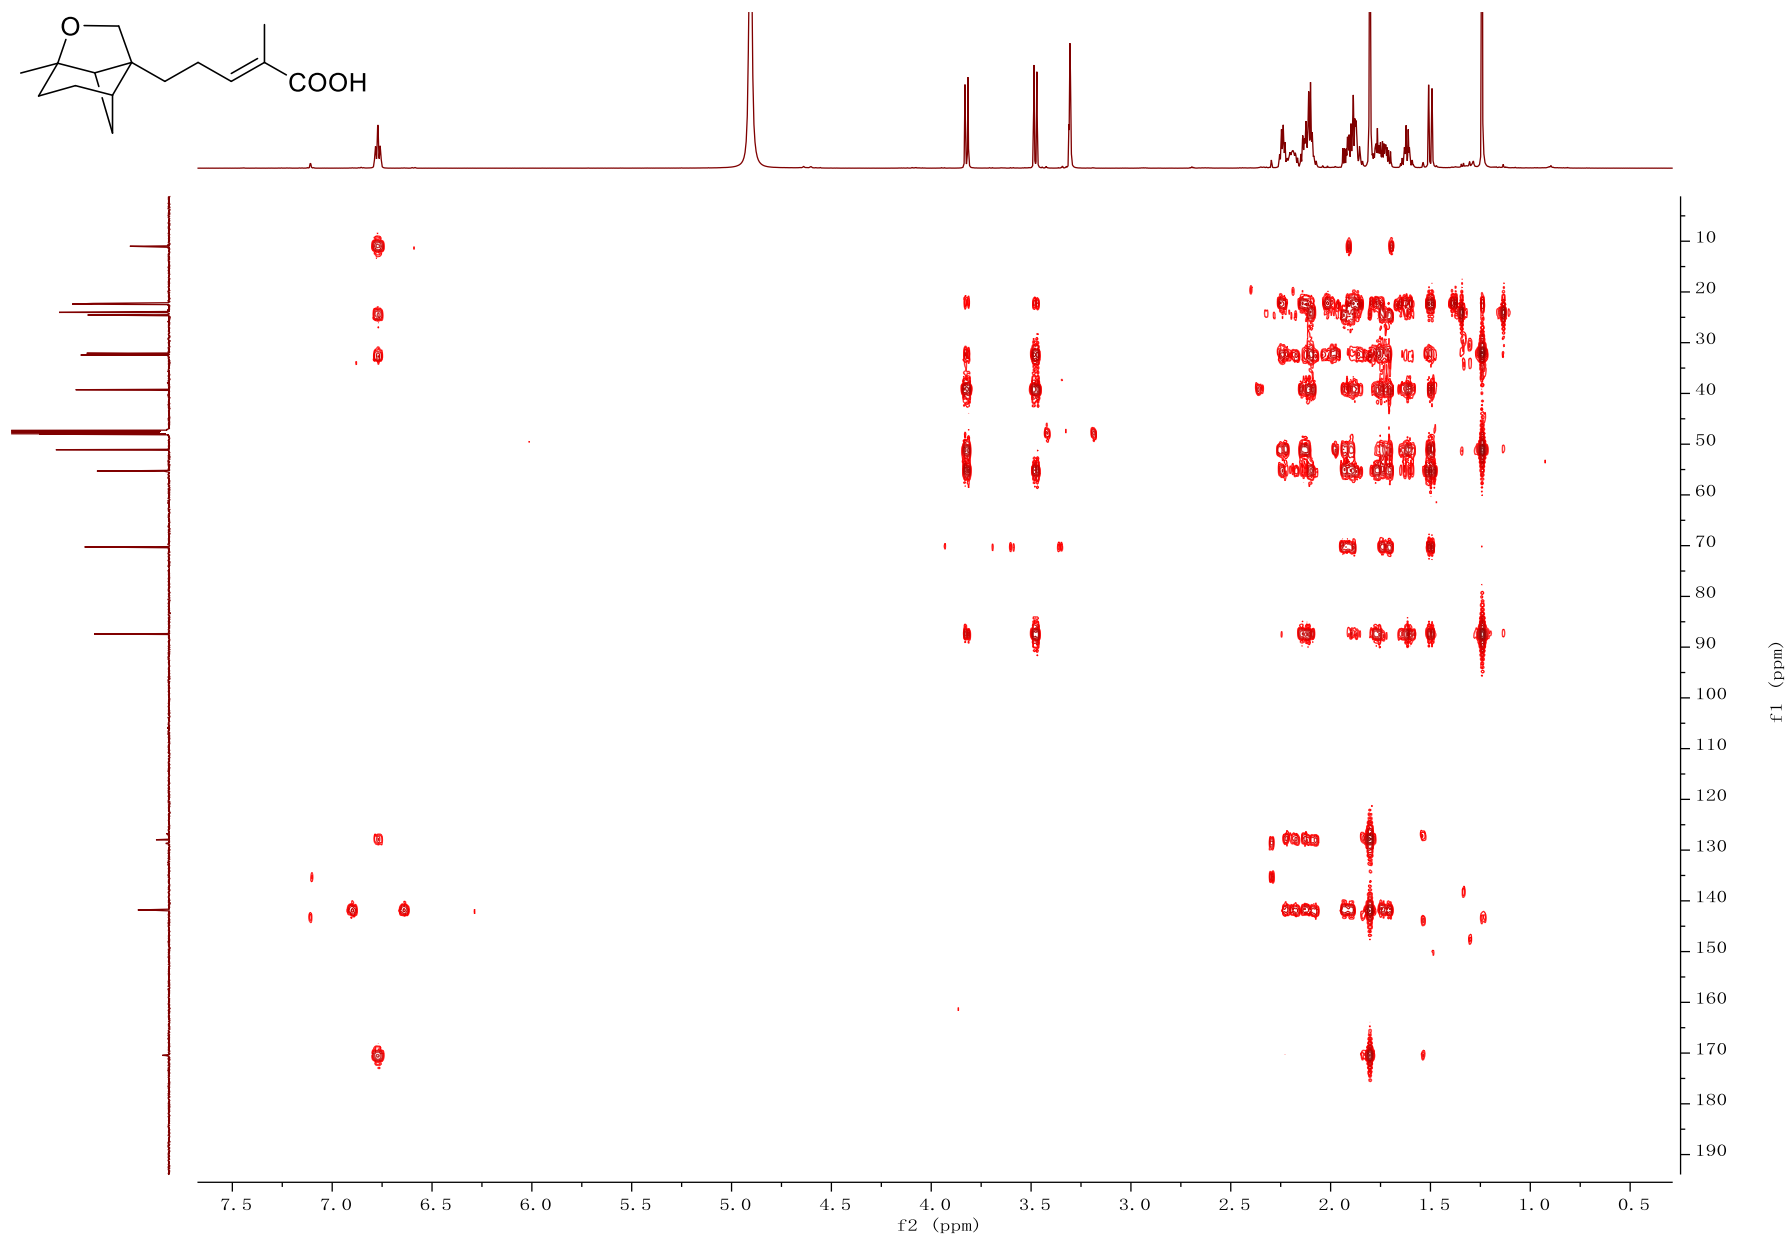

**Figure S84.**  $^1\text{H}$ - $^1\text{H}$  COSY of compound **9** in  $\text{CD}_3\text{OD}$

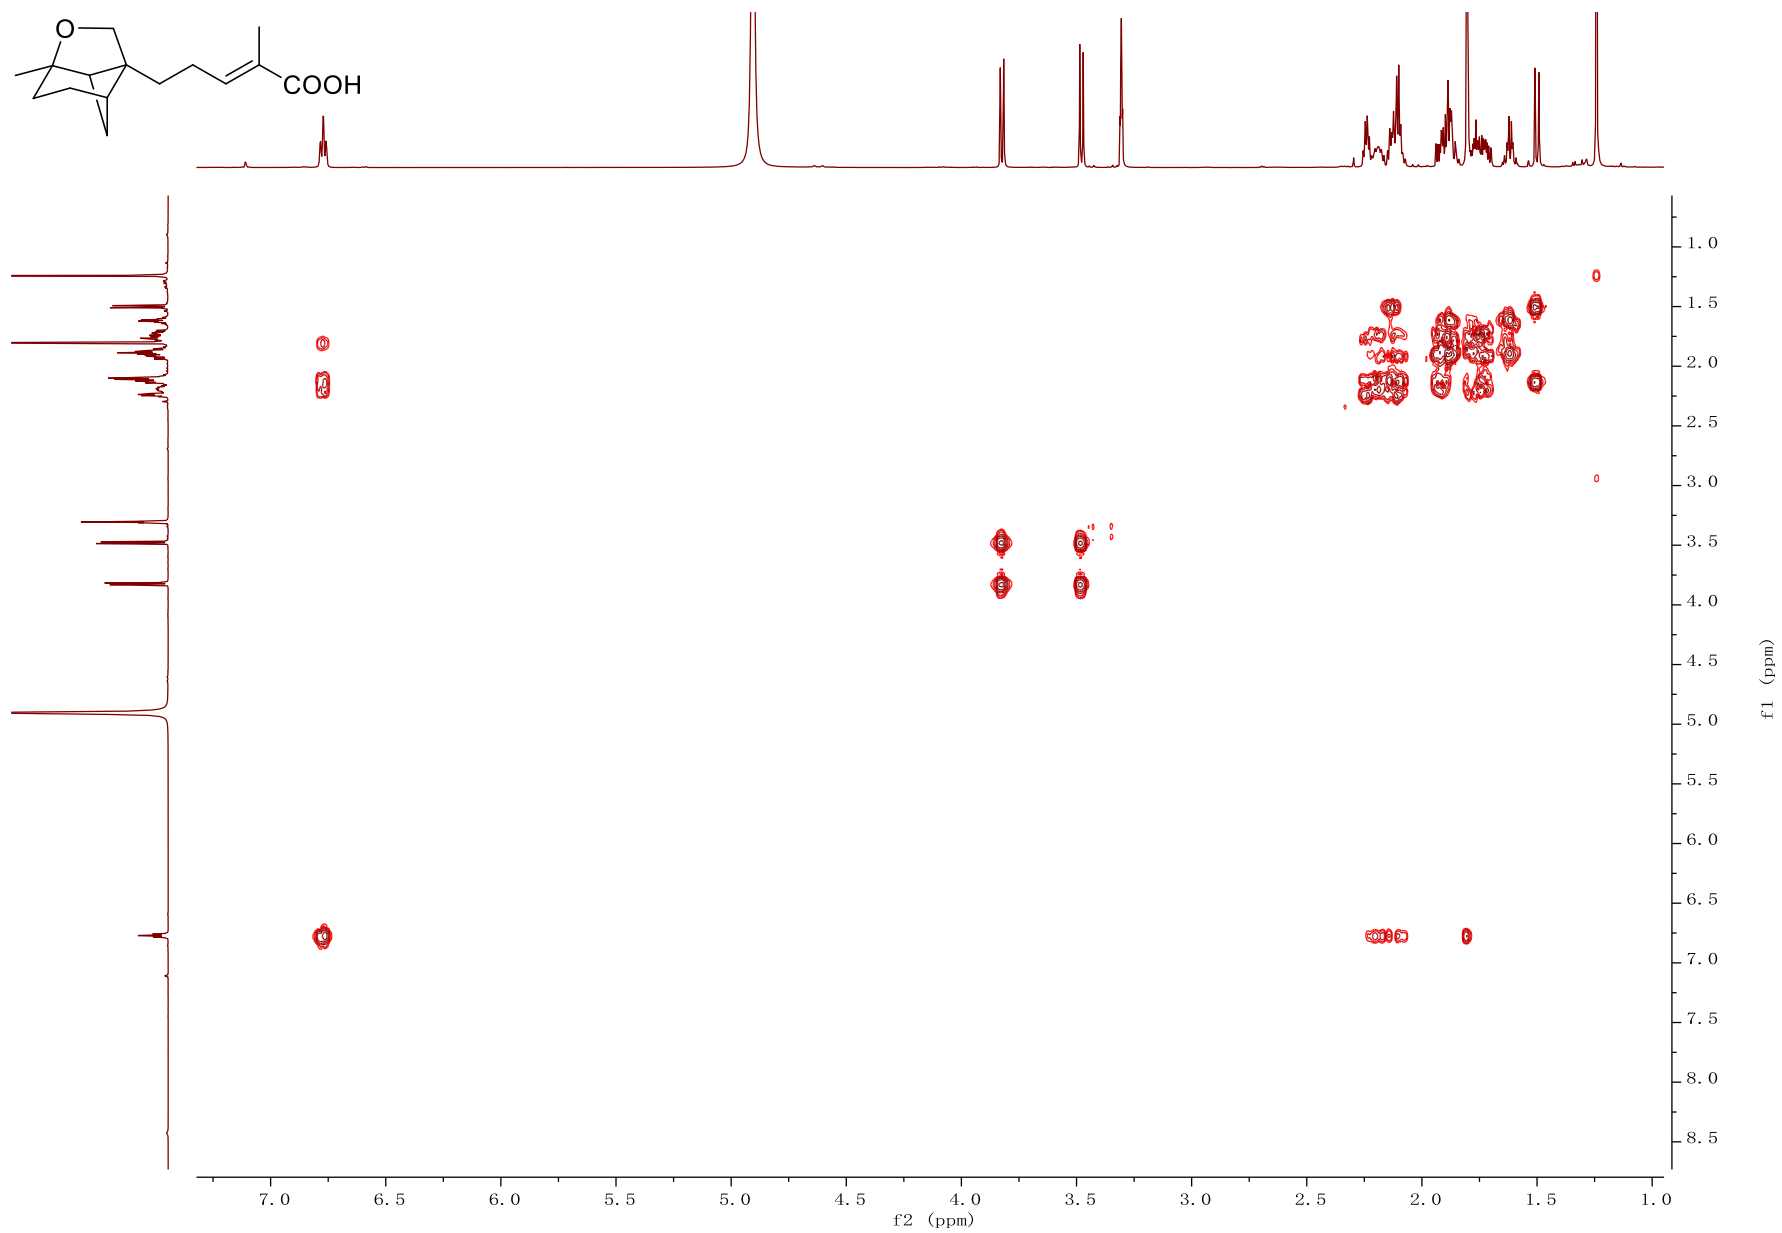



**Figure S85.** ROESY of compound **9** in CD<sub>3</sub>OD

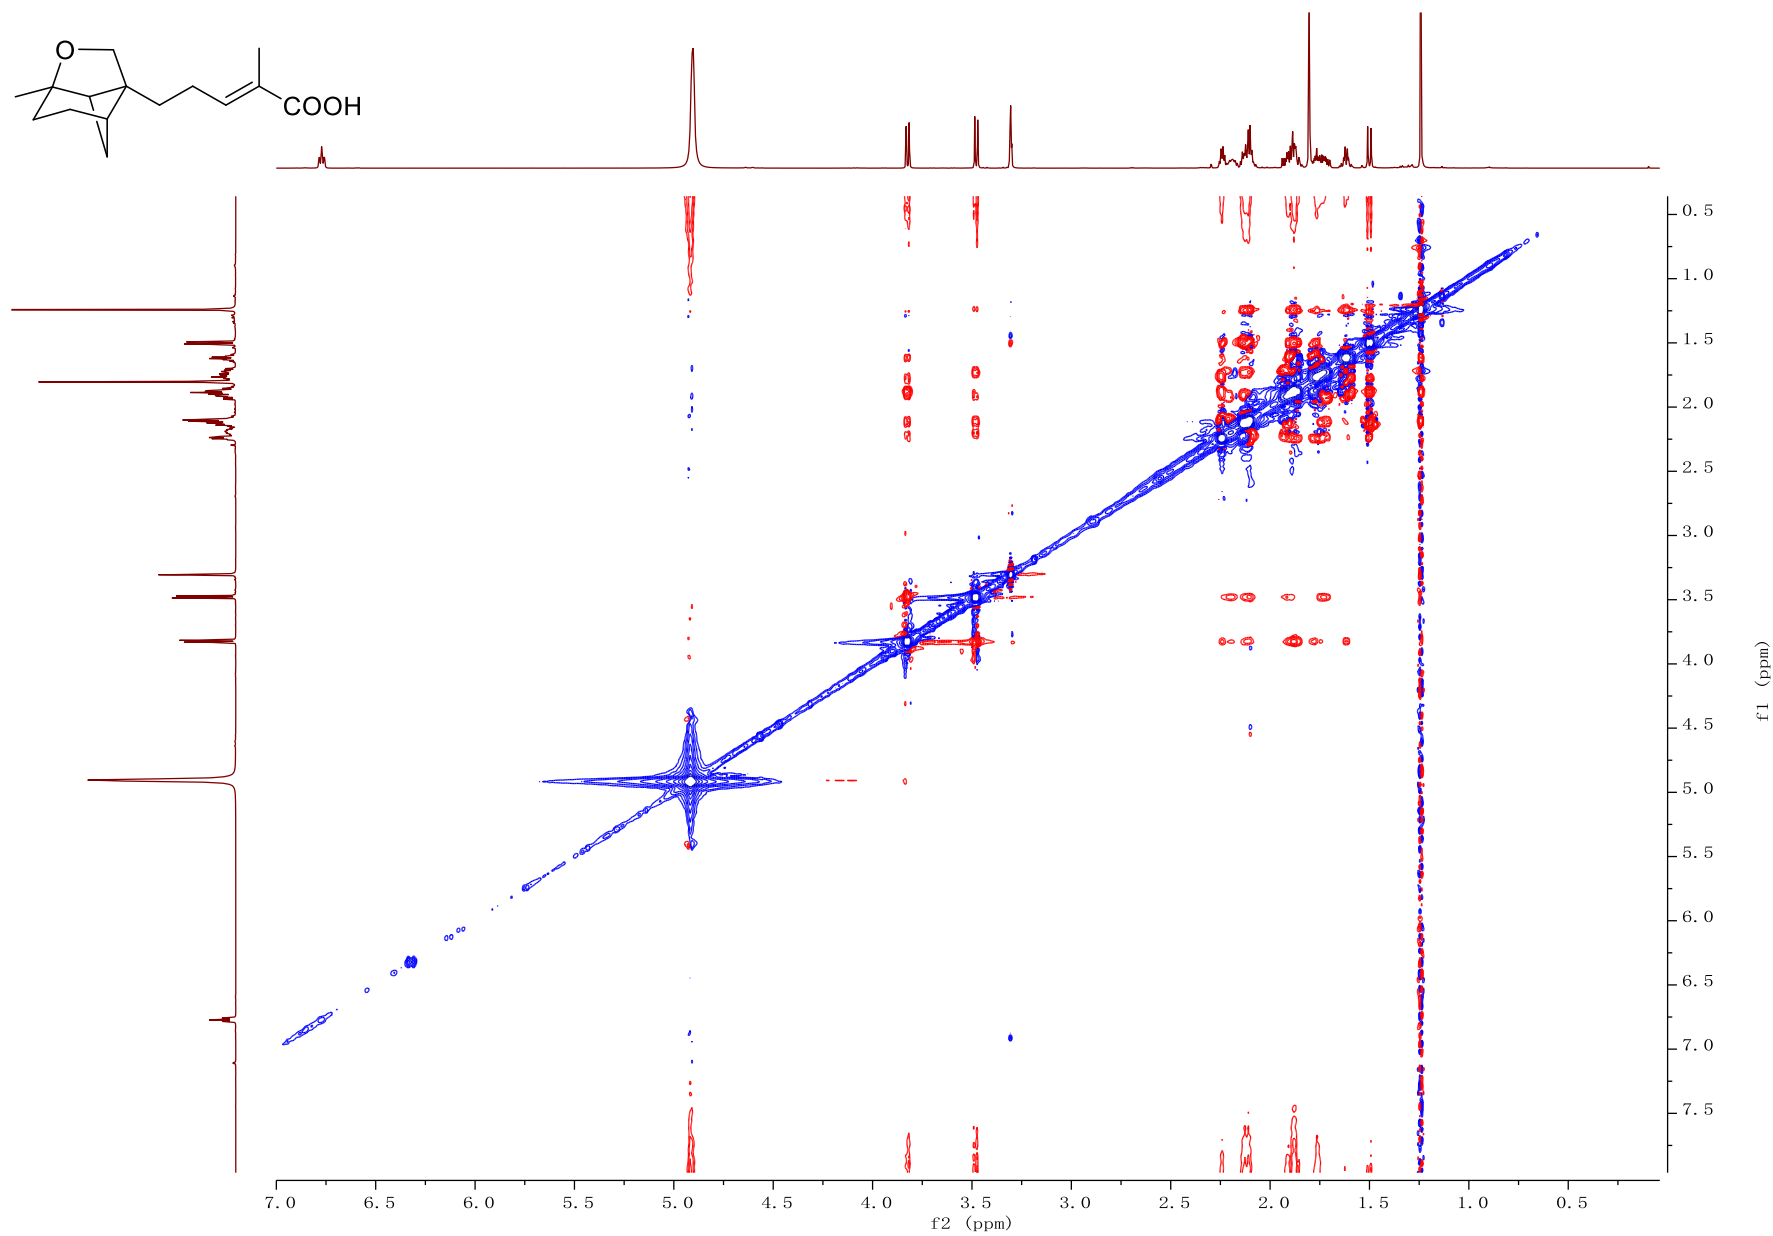

**Figure S86.** HR-ESIMS of compound **9**

T: FTMS + p ESI Full lock ms [150.0000-1100.0000]

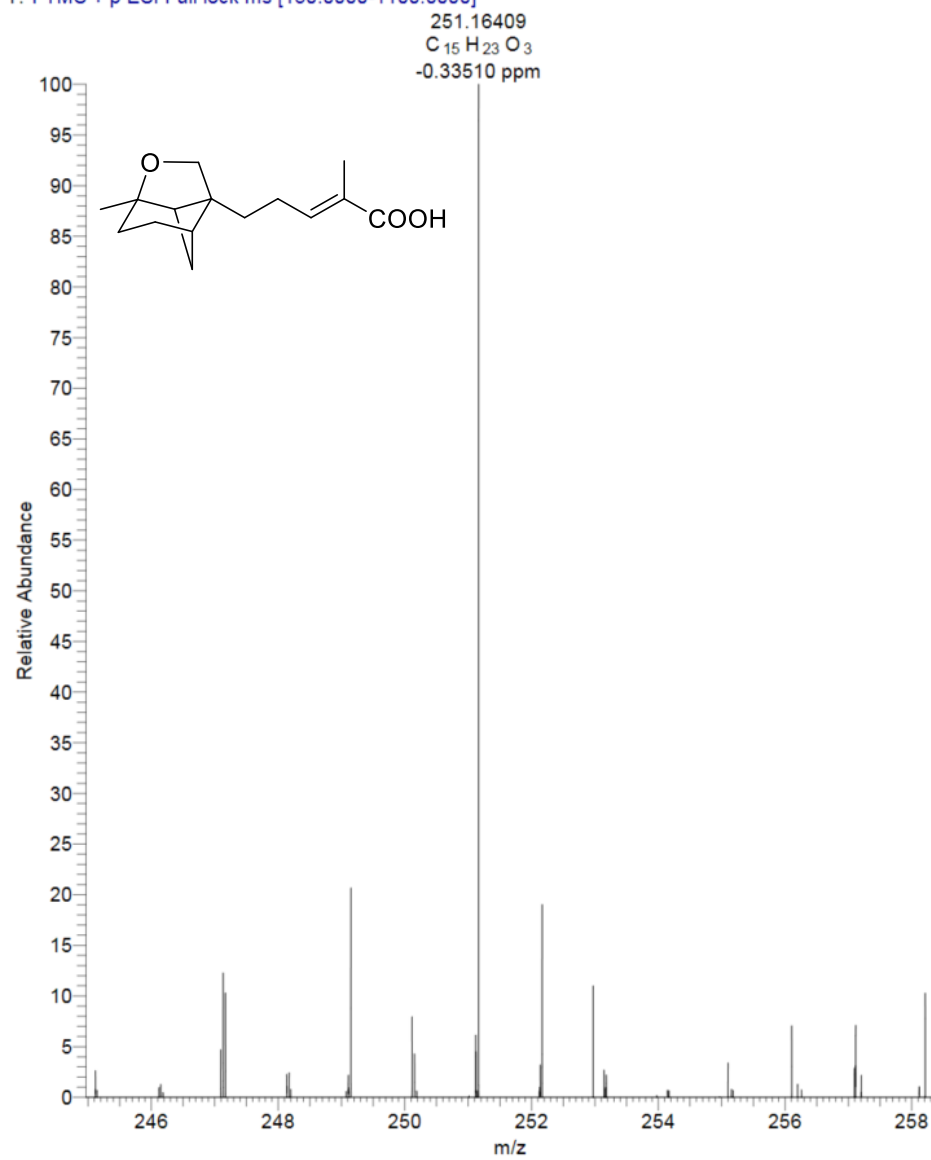

## Section S17. NMR and MS spectra for 10

Figure S87.  $^1\text{H}$  NMR of compound **10** in  $\text{CD}_3\text{OD}$

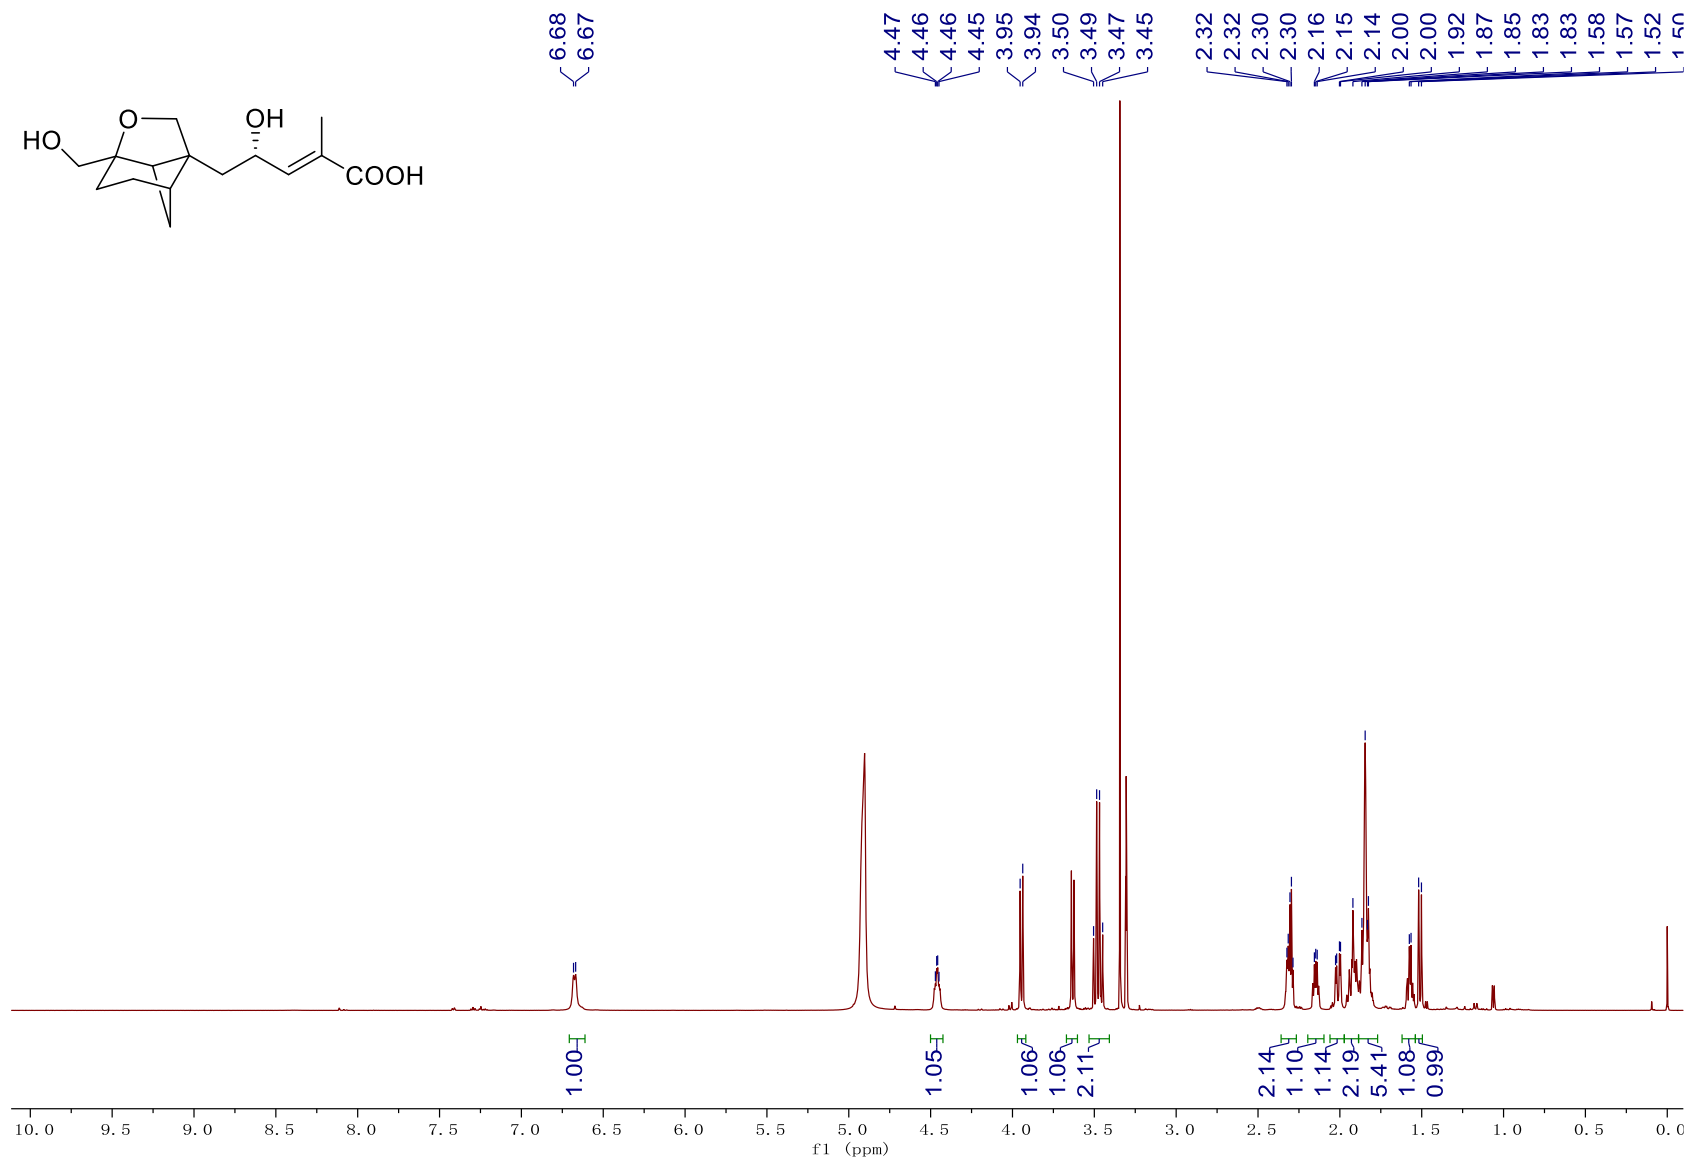

**Figure S88.**  $^{13}\text{C}$  NMR and DEPT of compound **10** in  $\text{CD}_3\text{OD}$

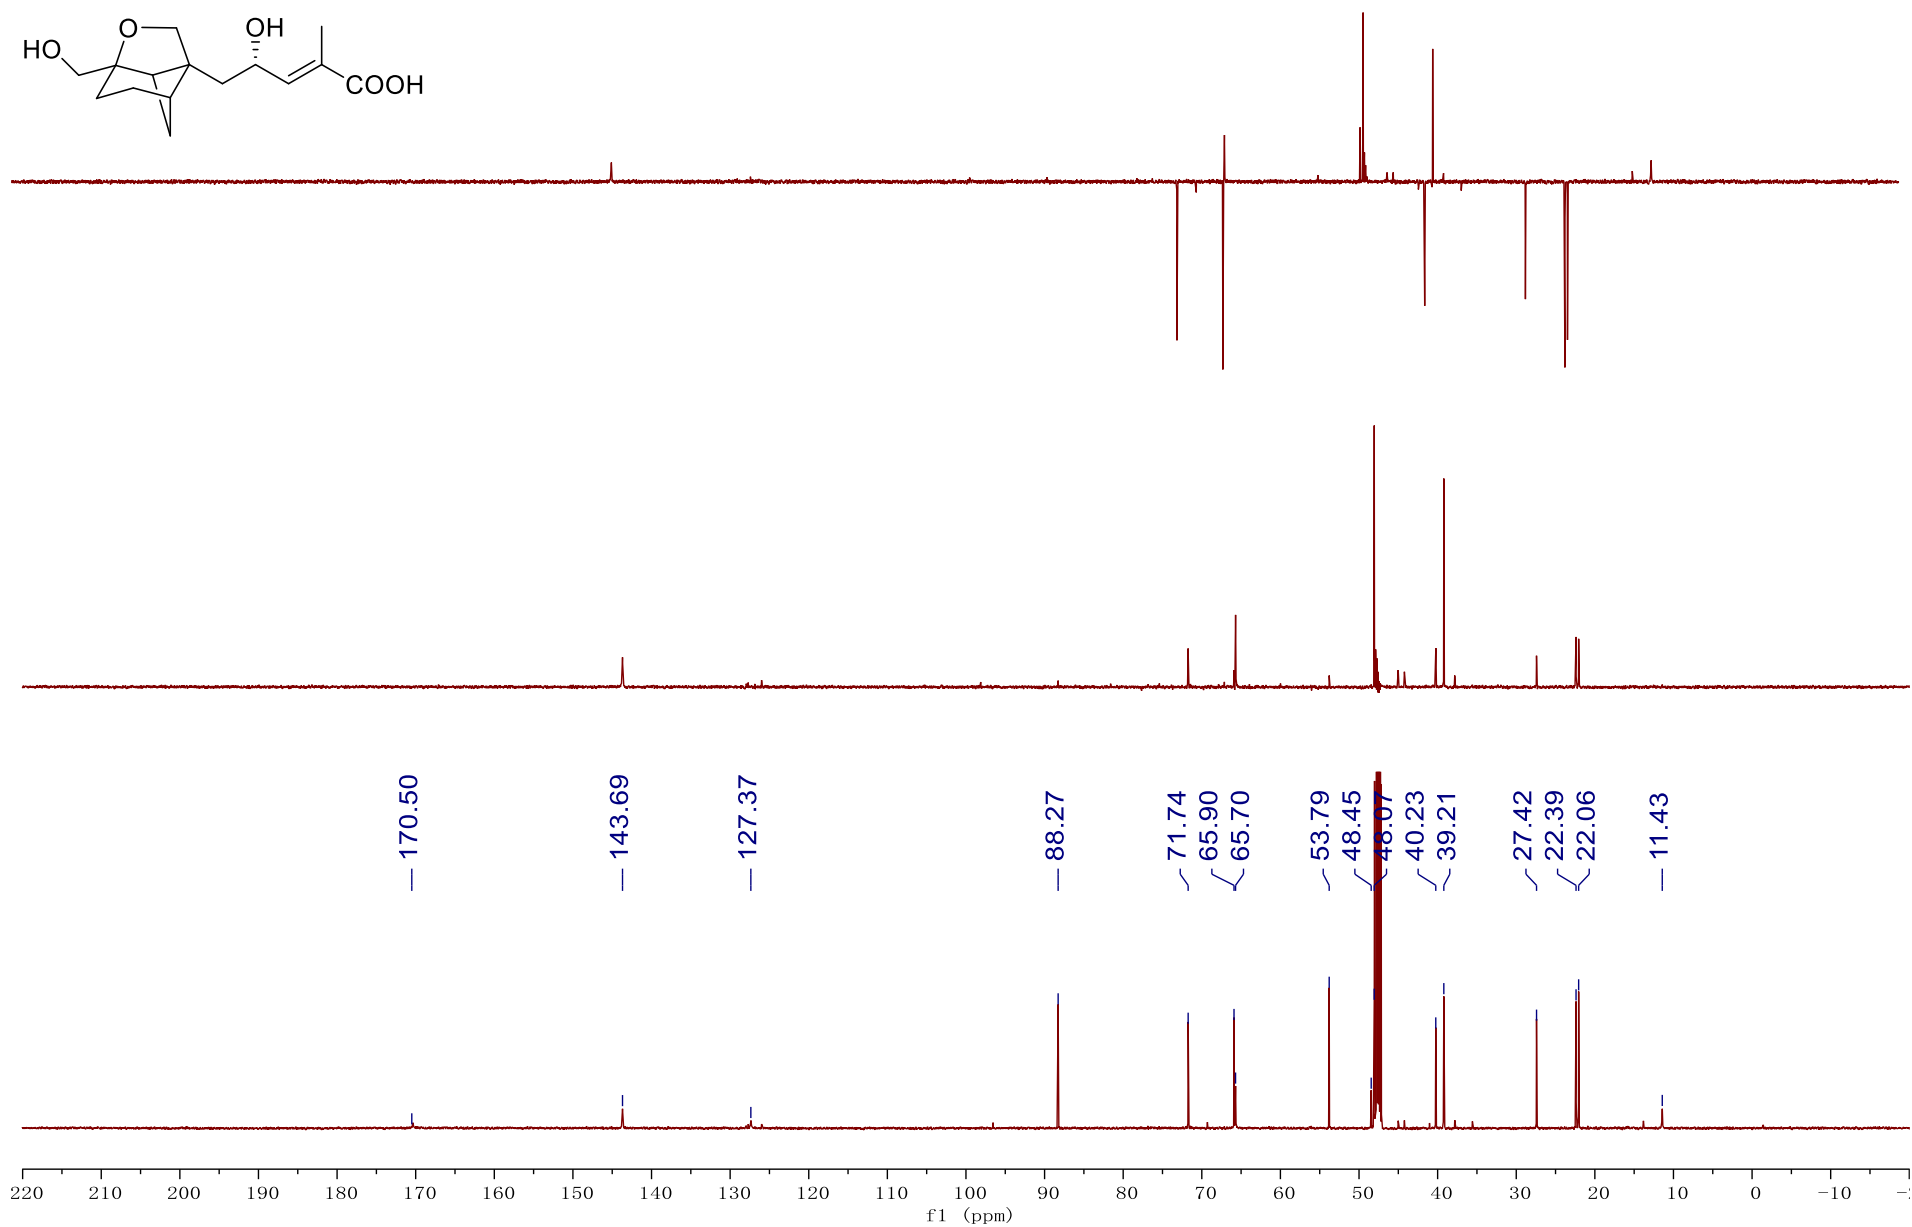

**Figure S89.** HSQC of compound **10** in CD<sub>3</sub>OD

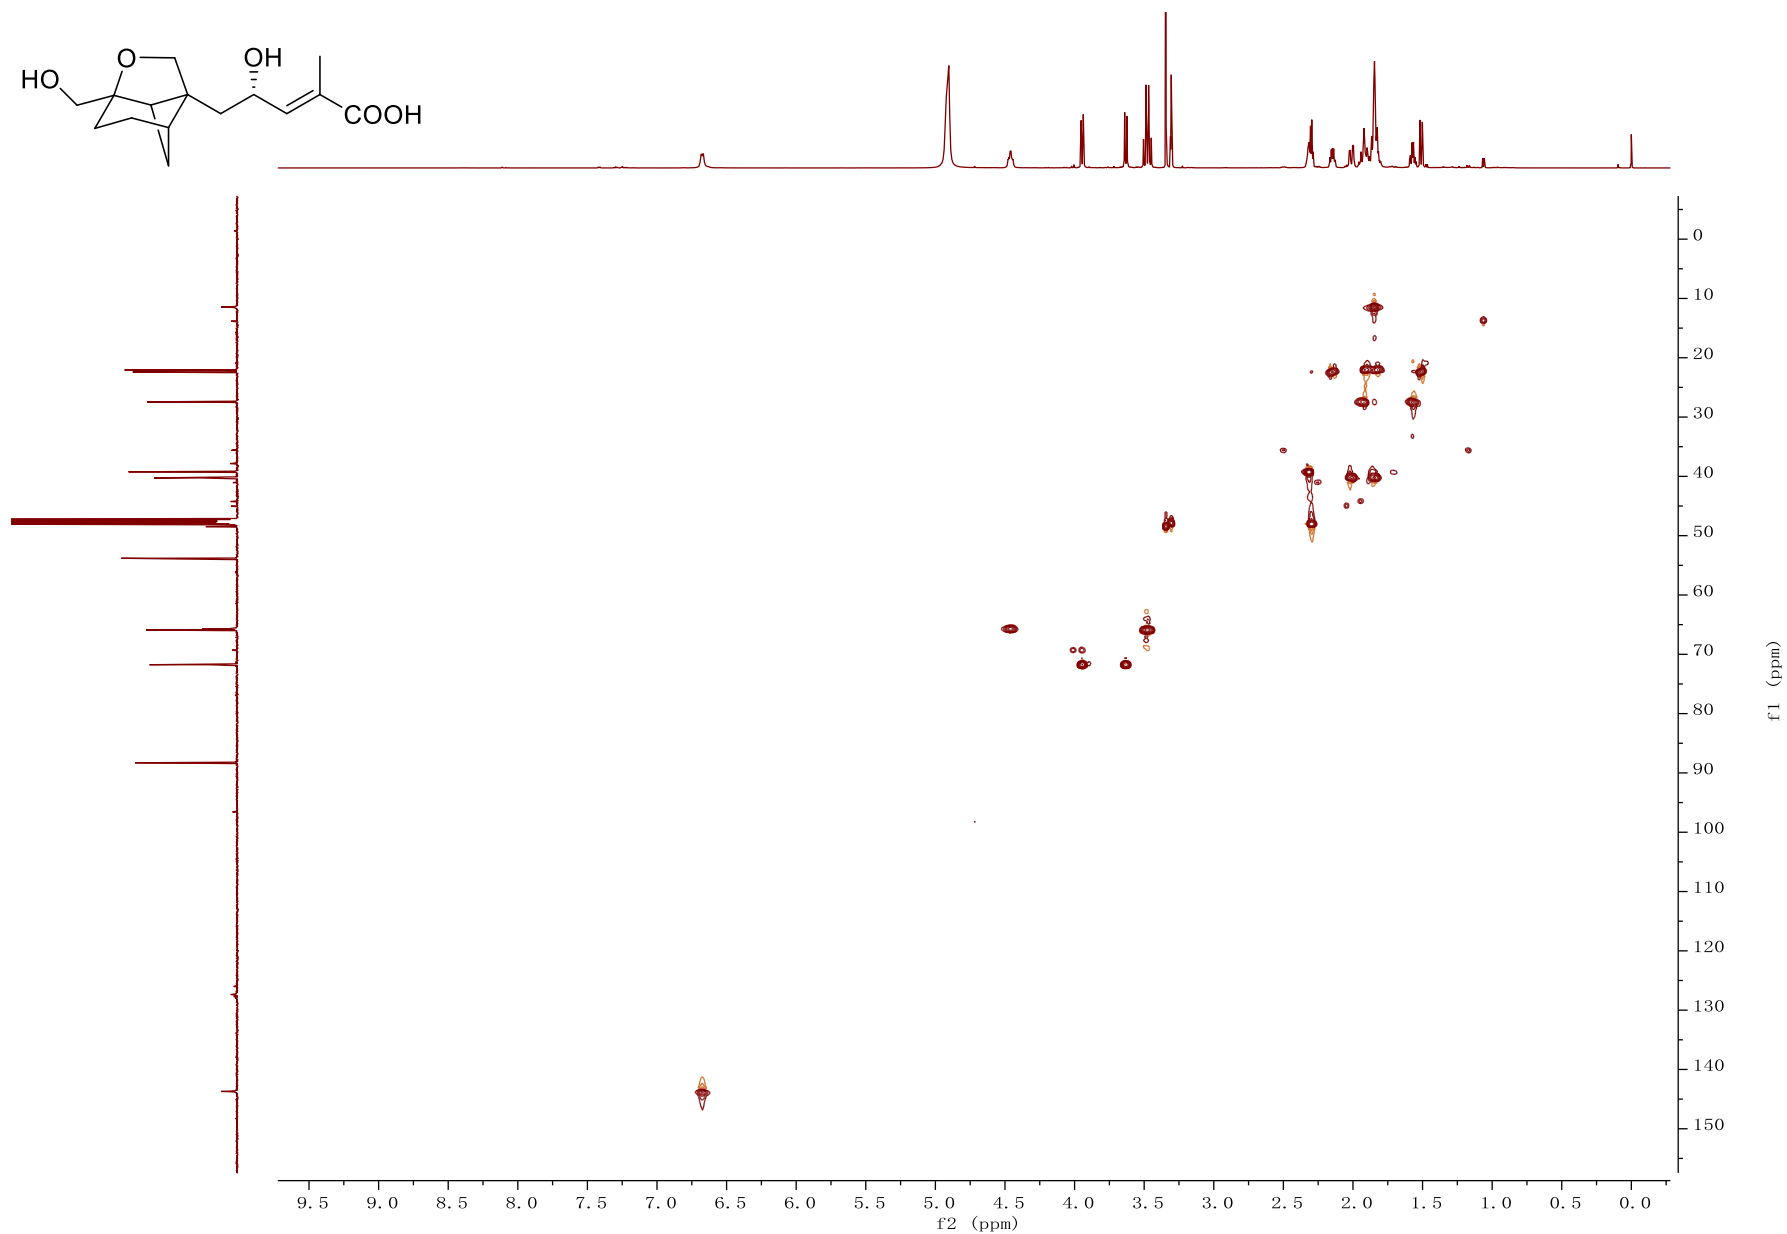

**Figure S90.** HMBC of compound **10** in CD<sub>3</sub>OD

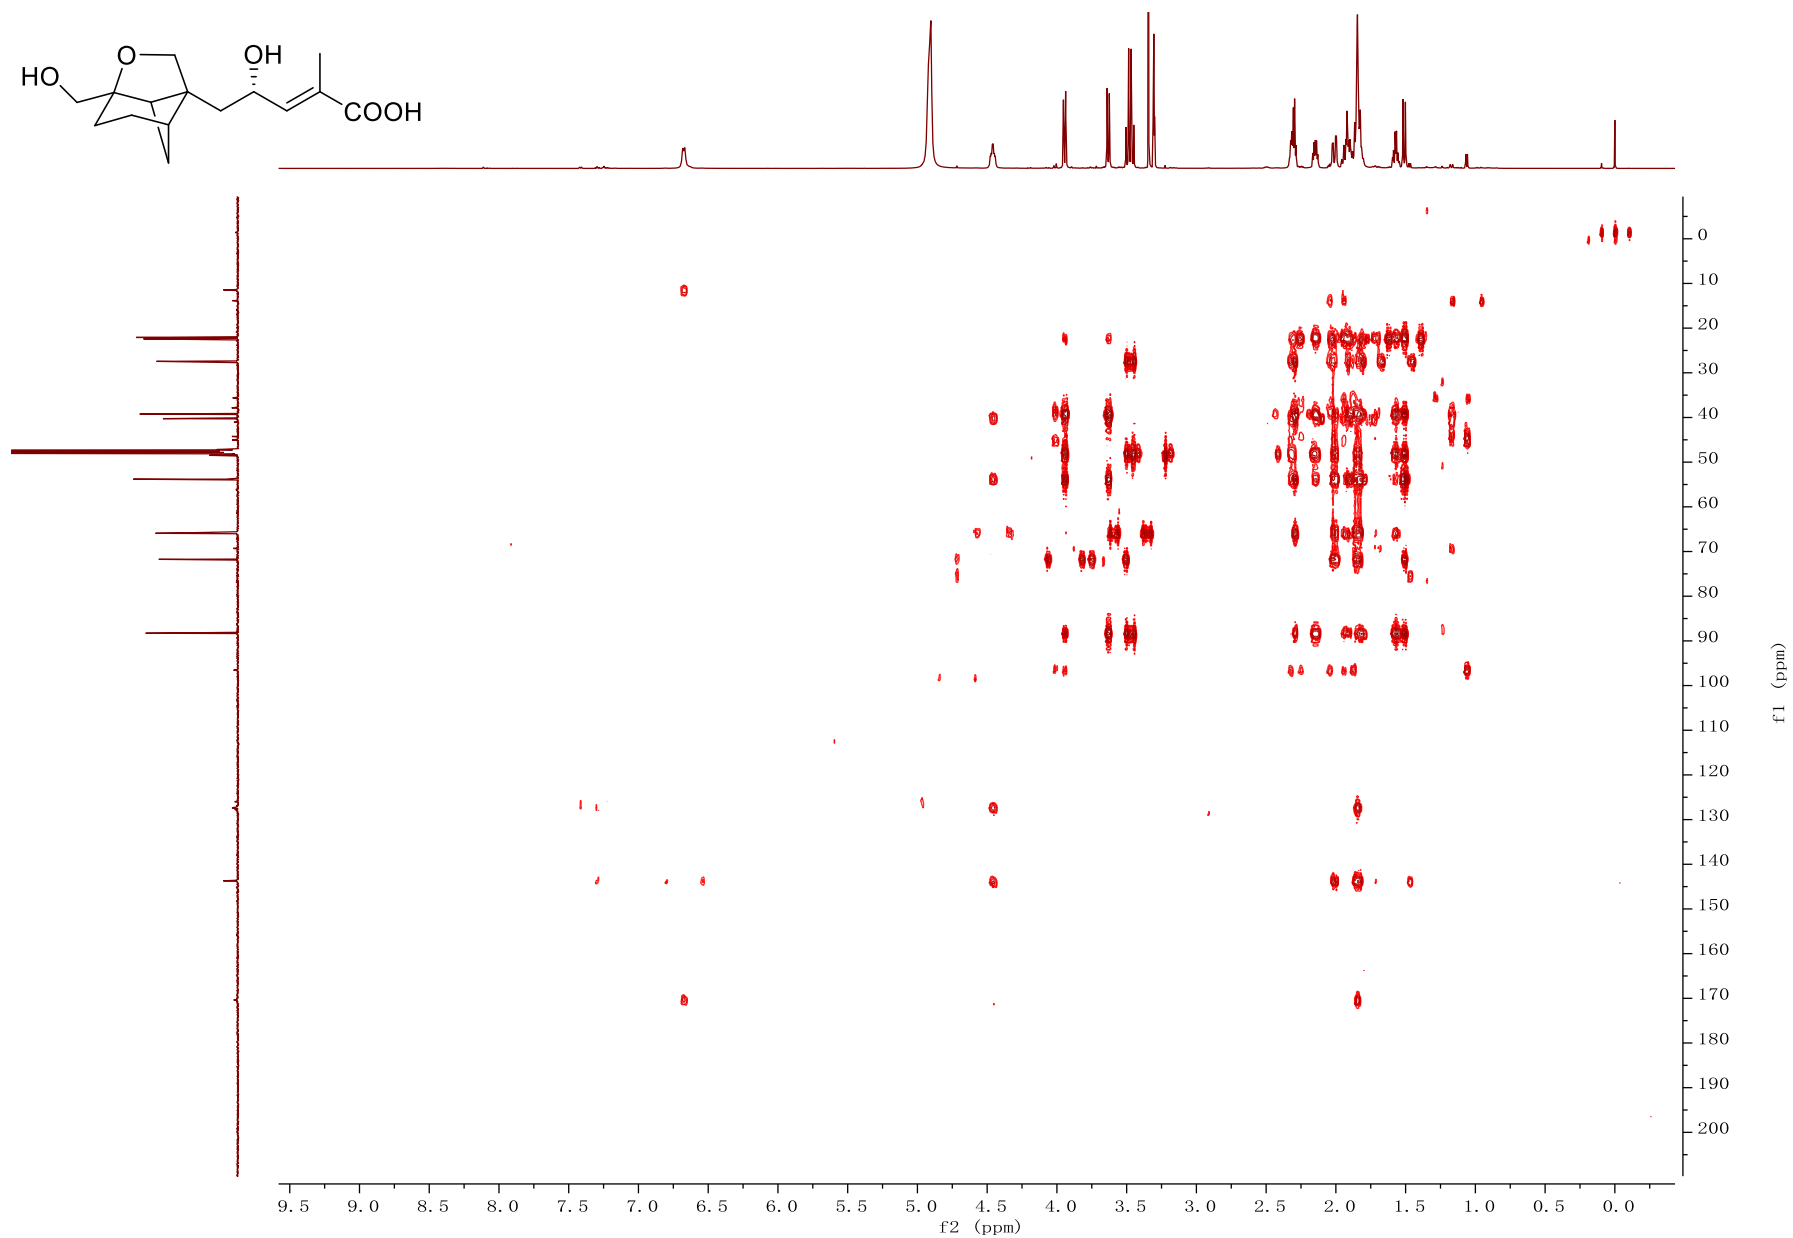

**Figure S91.**  $^1\text{H}$ - $^1\text{H}$  COSY of compound **10** in  $\text{CD}_3\text{OD}$

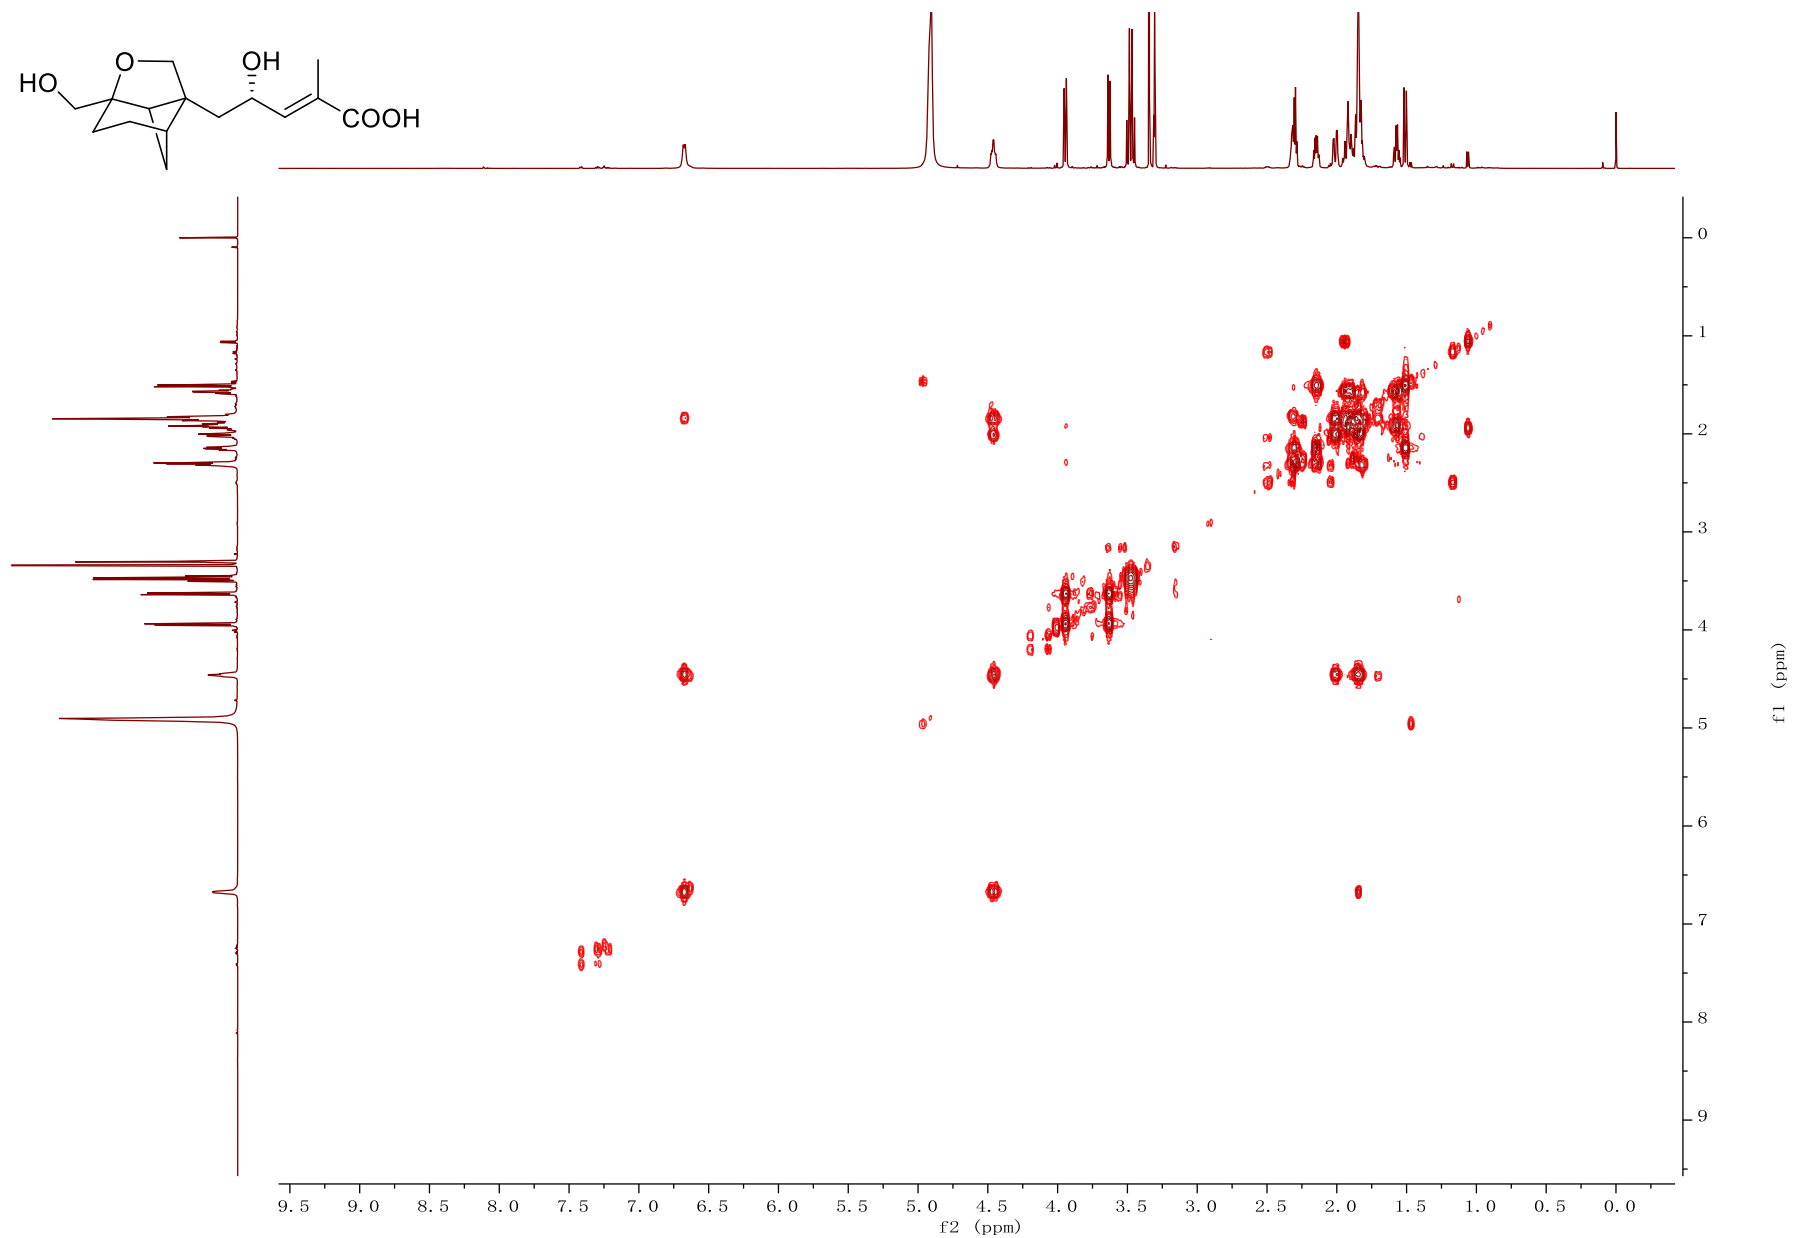

**Figure S92.** ROESY of compound **10** in CD<sub>3</sub>OD

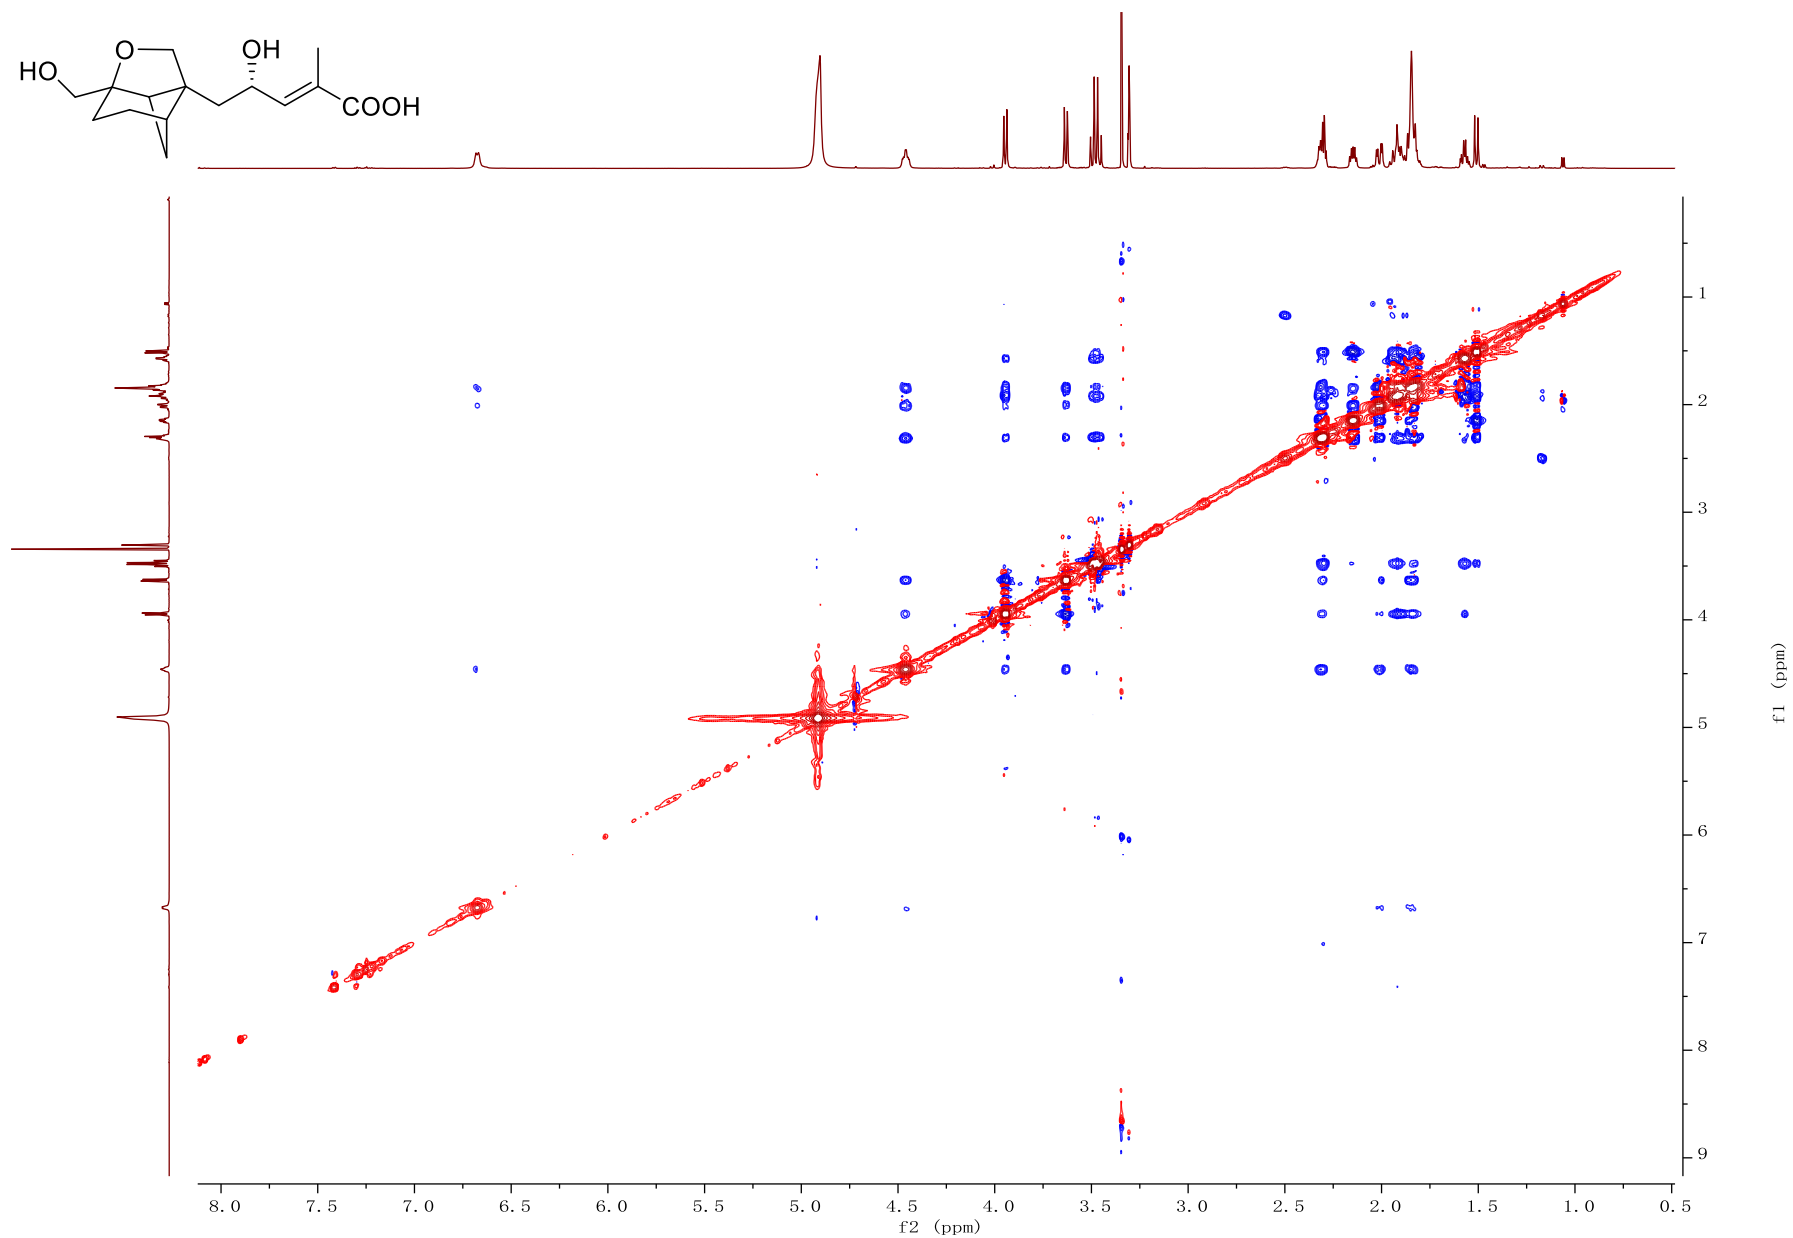



**Figure S93.** HR-ESIMS of compound **10**

T: FTMS + p ESI Full ms [150.0000-1100.0000]

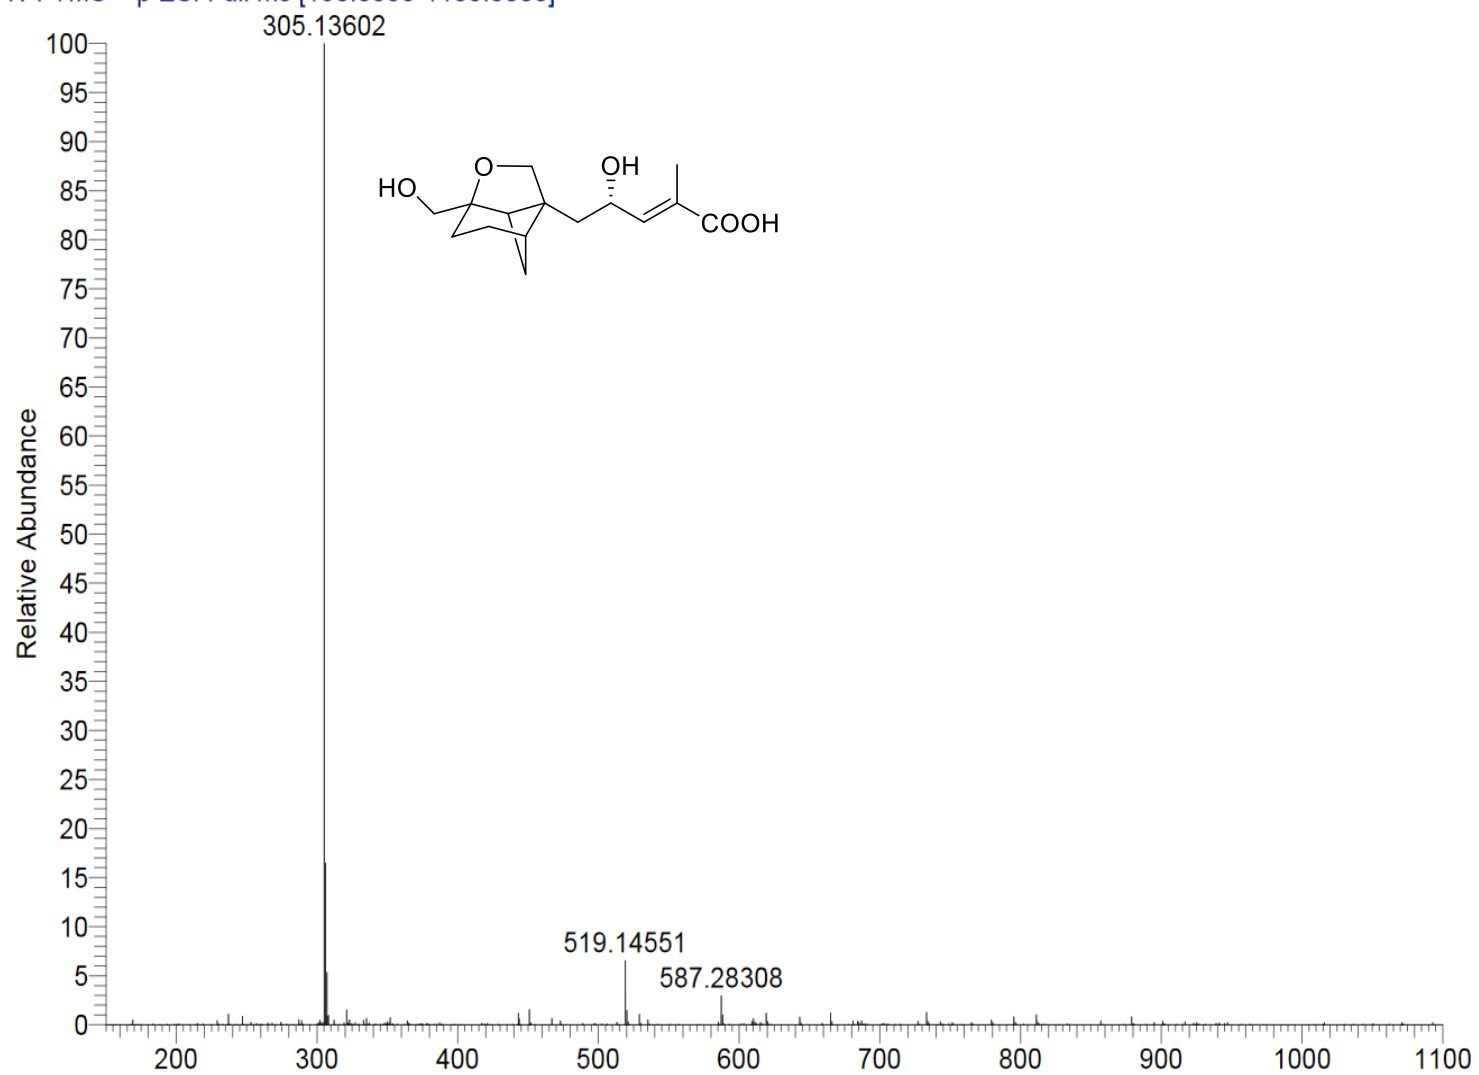

## Section S18. NMR and MS spectra for 11

Figure S94.  $^1\text{H}$  NMR of compound **11** in  $\text{CD}_3\text{OD}$

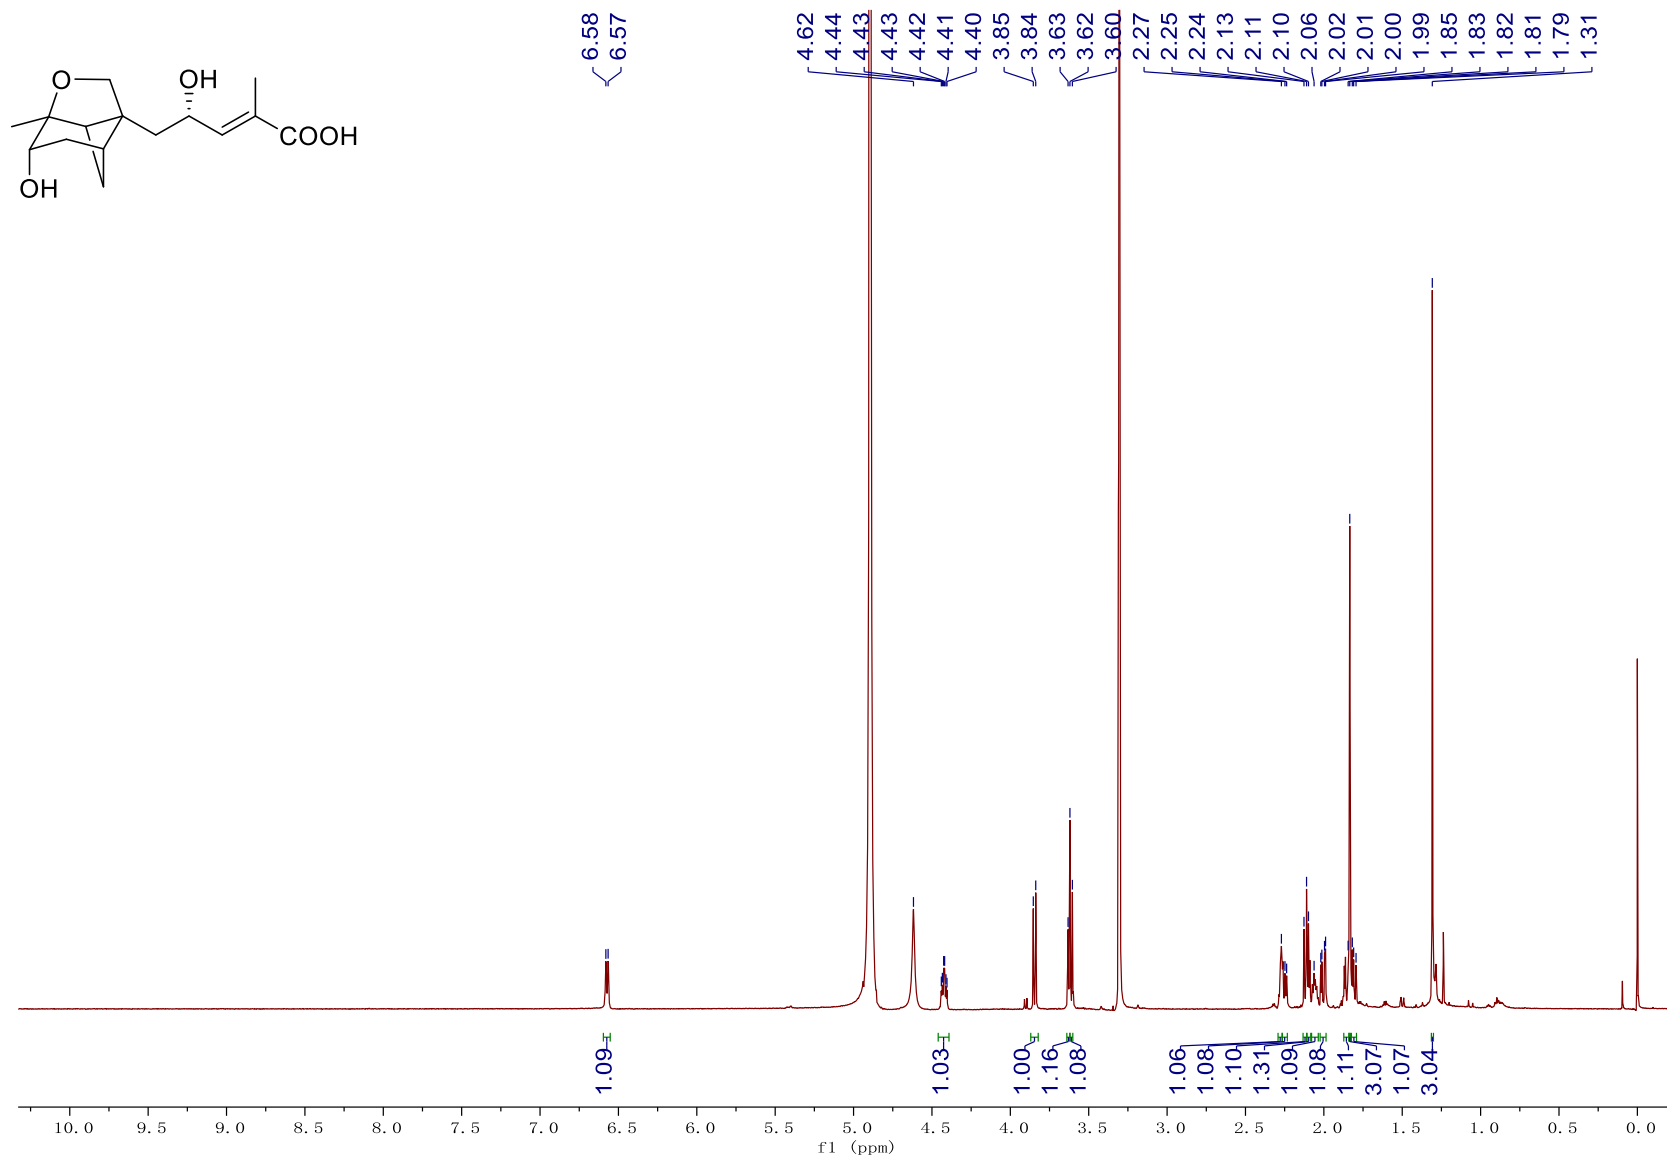

**Figure S95.**  $^{13}\text{C}$  NMR and DEPT of compound **11** in  $\text{CD}_3\text{OD}$

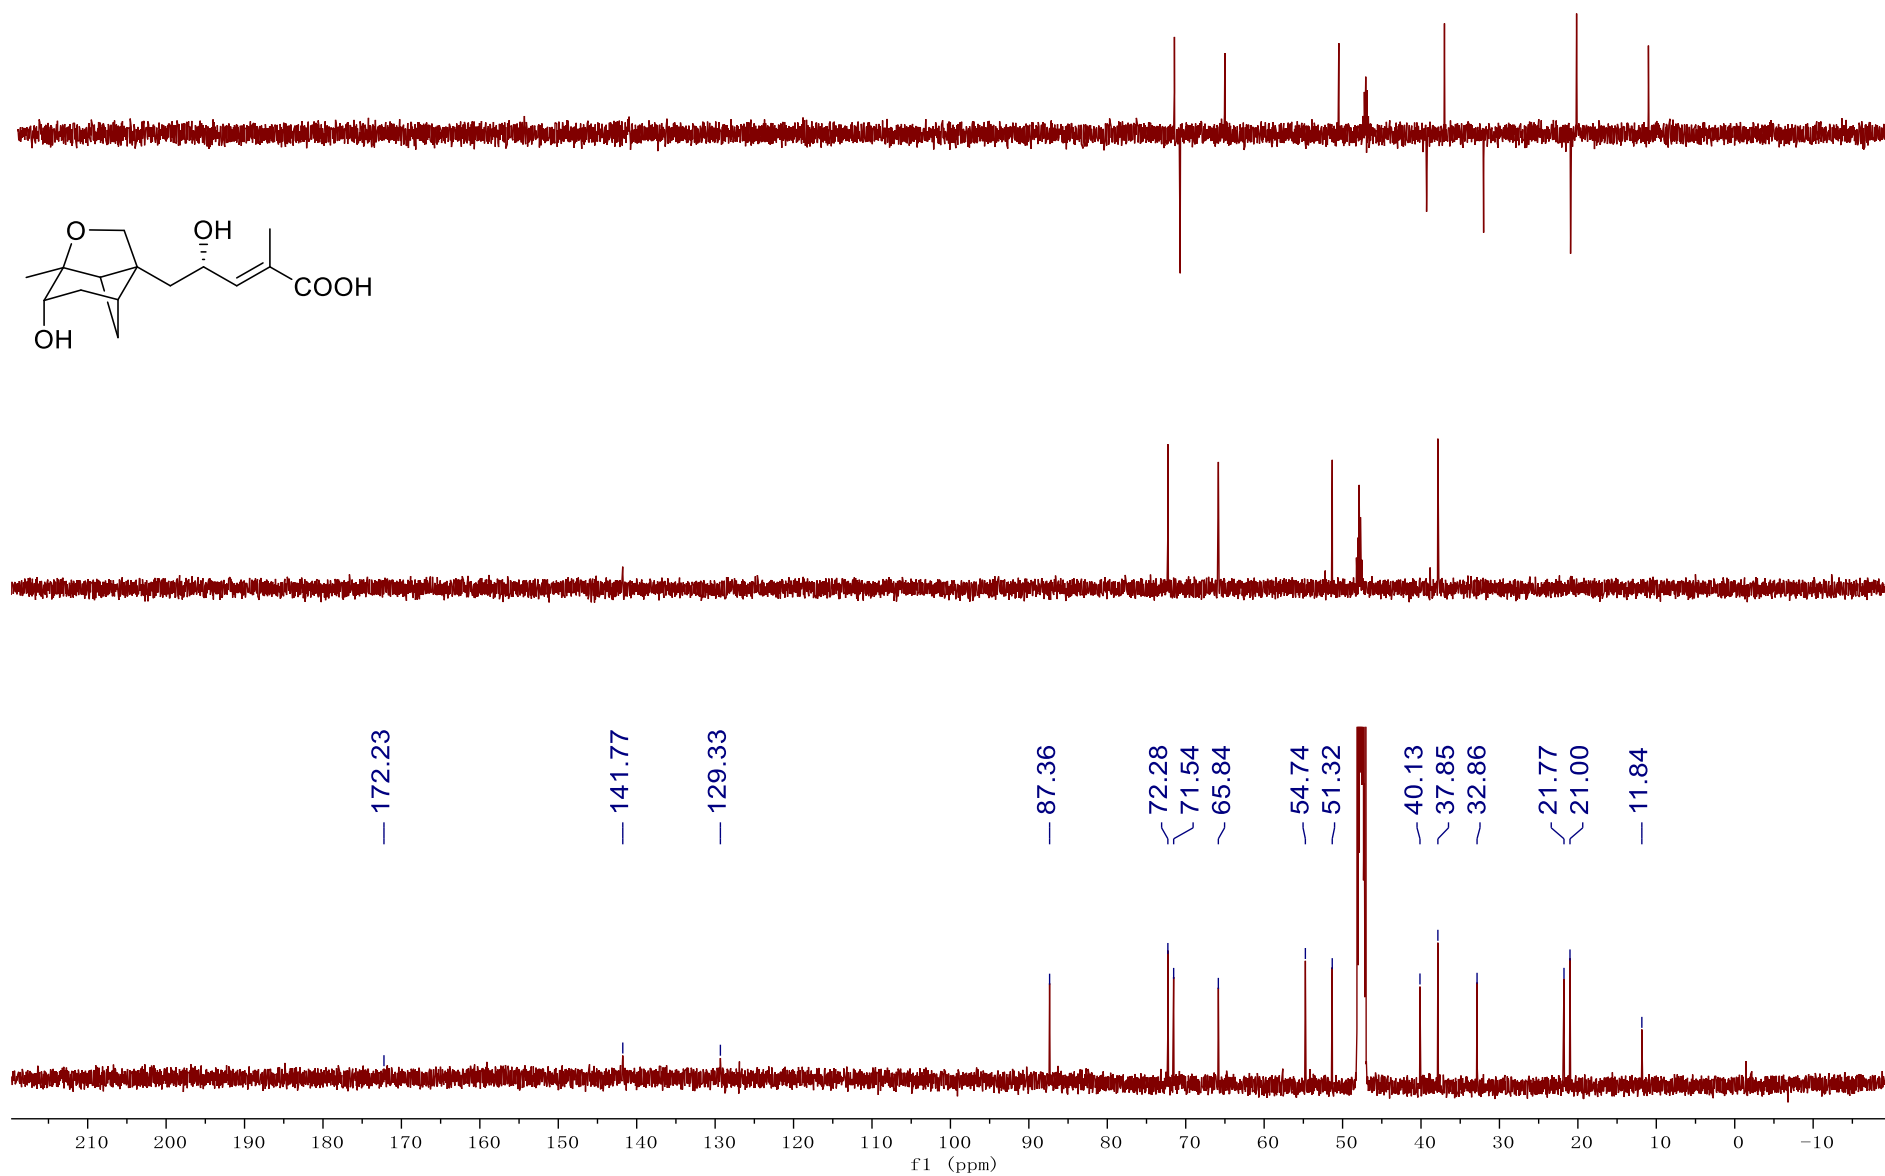

**Figure S96.** HSQC of compound **11** in CD<sub>3</sub>OD

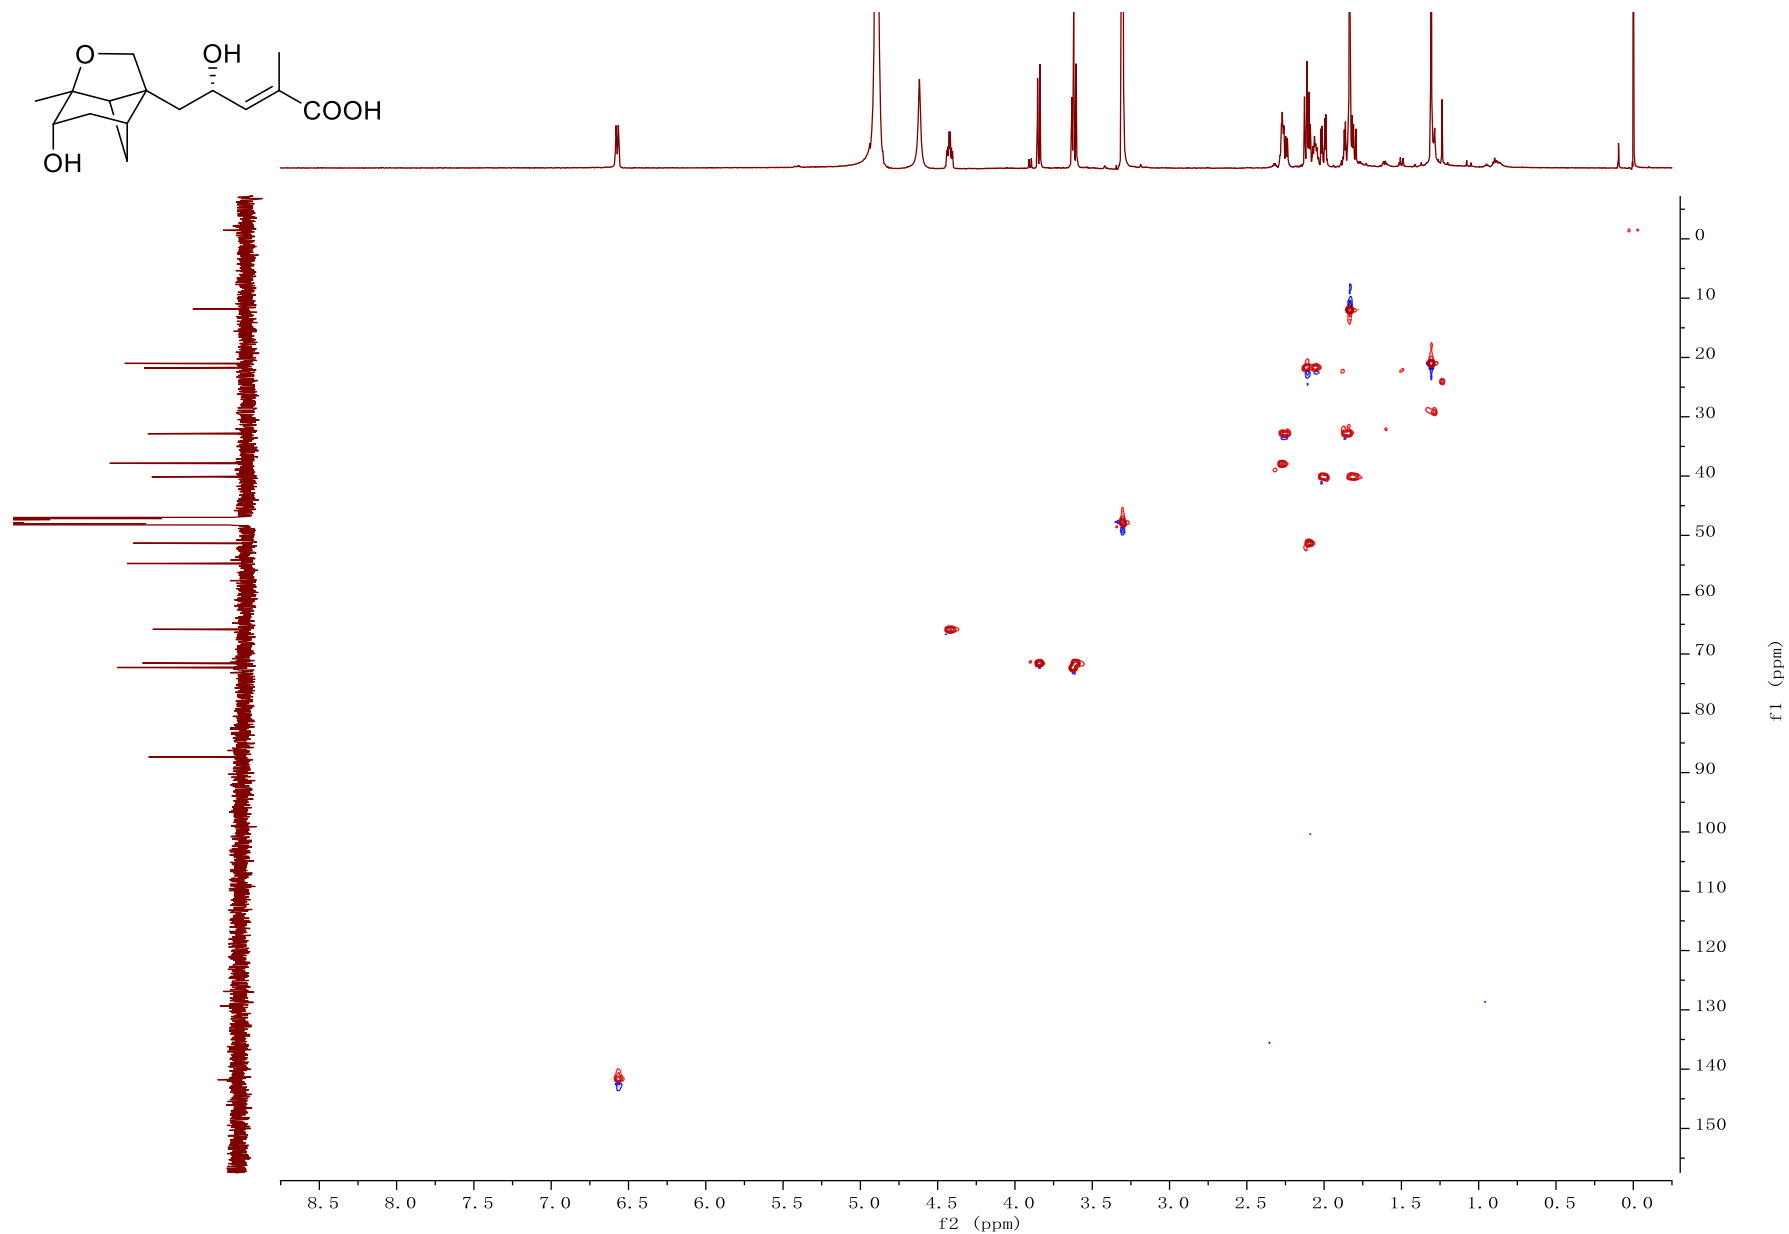

**Figure S97.** HMBC of compound **11** in CD<sub>3</sub>OD

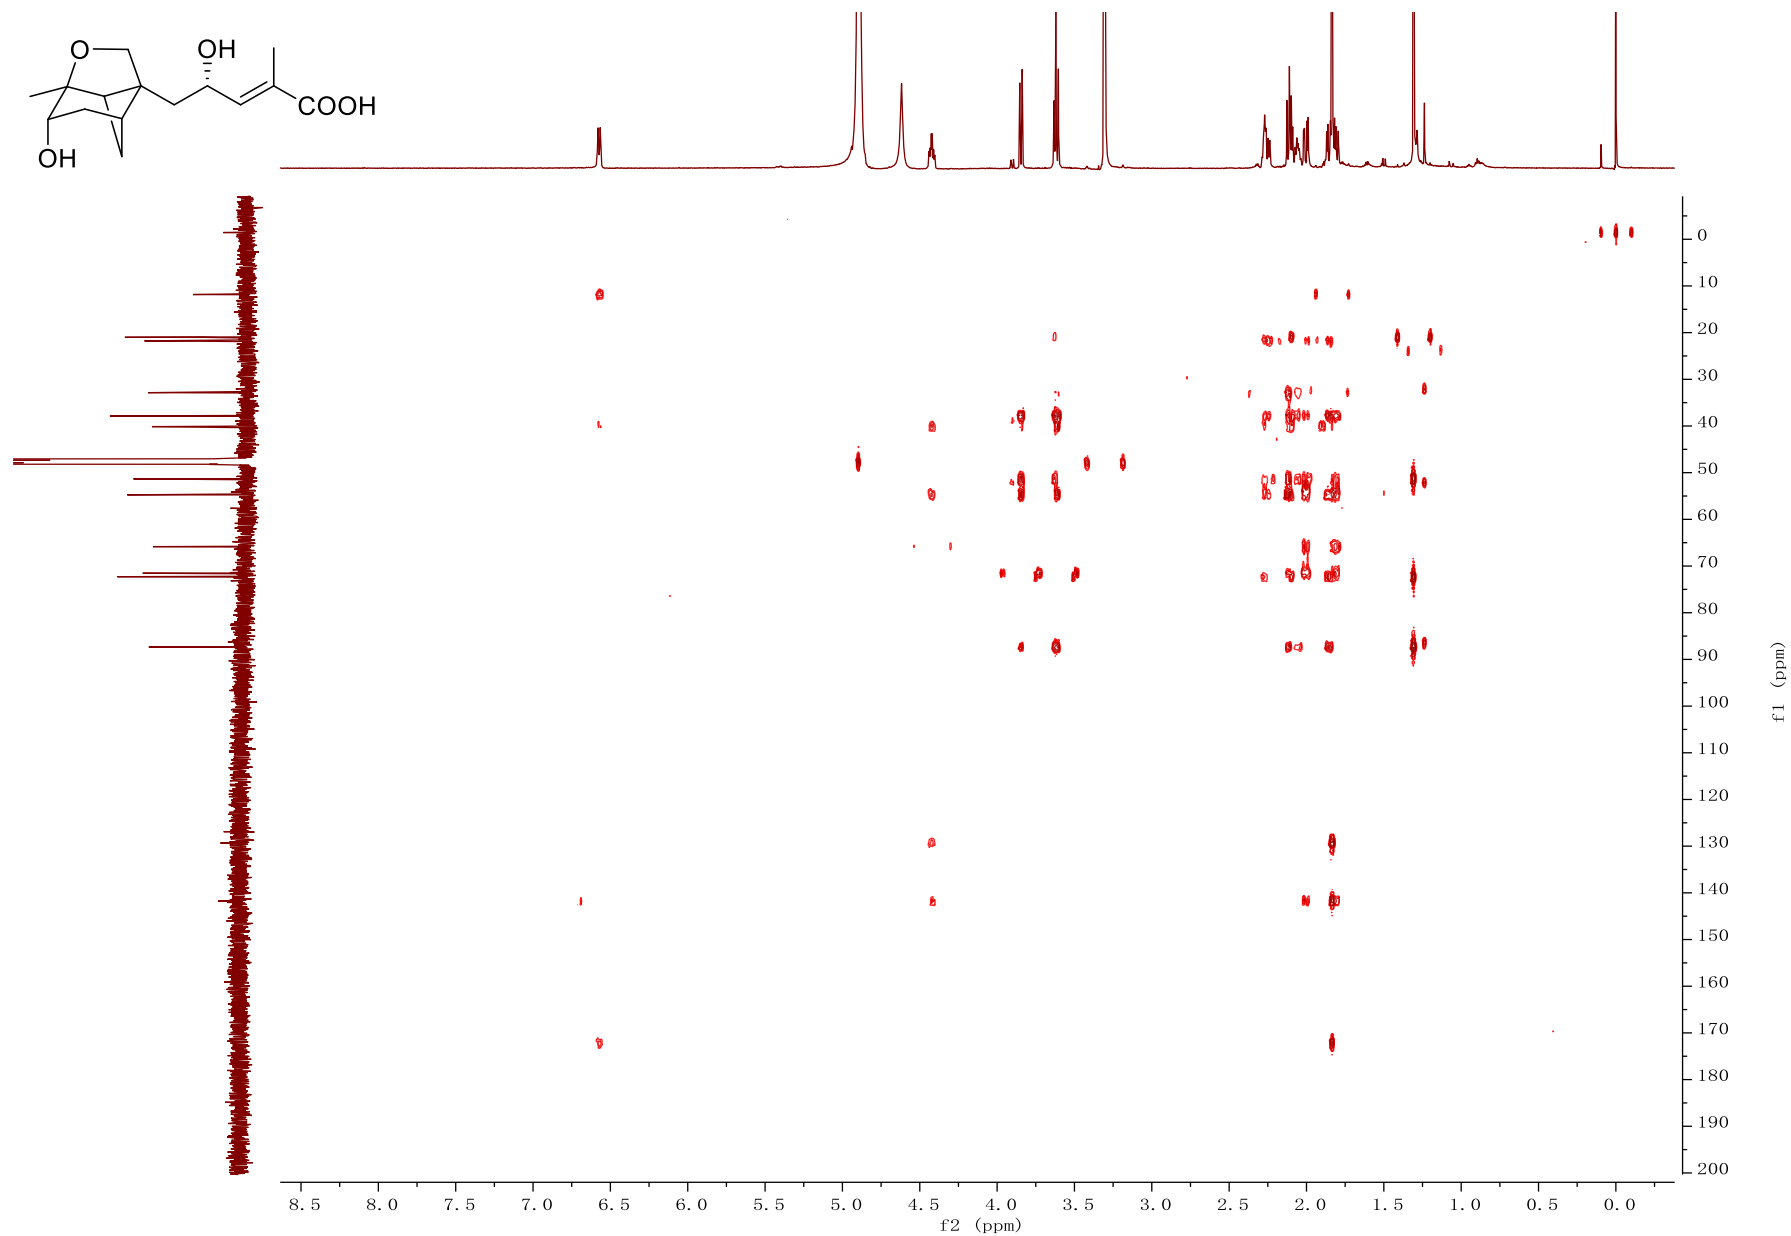

**Figure S98.**  $^1\text{H}$ - $^1\text{H}$  COSY of compound **11** in  $\text{CD}_3\text{OD}$

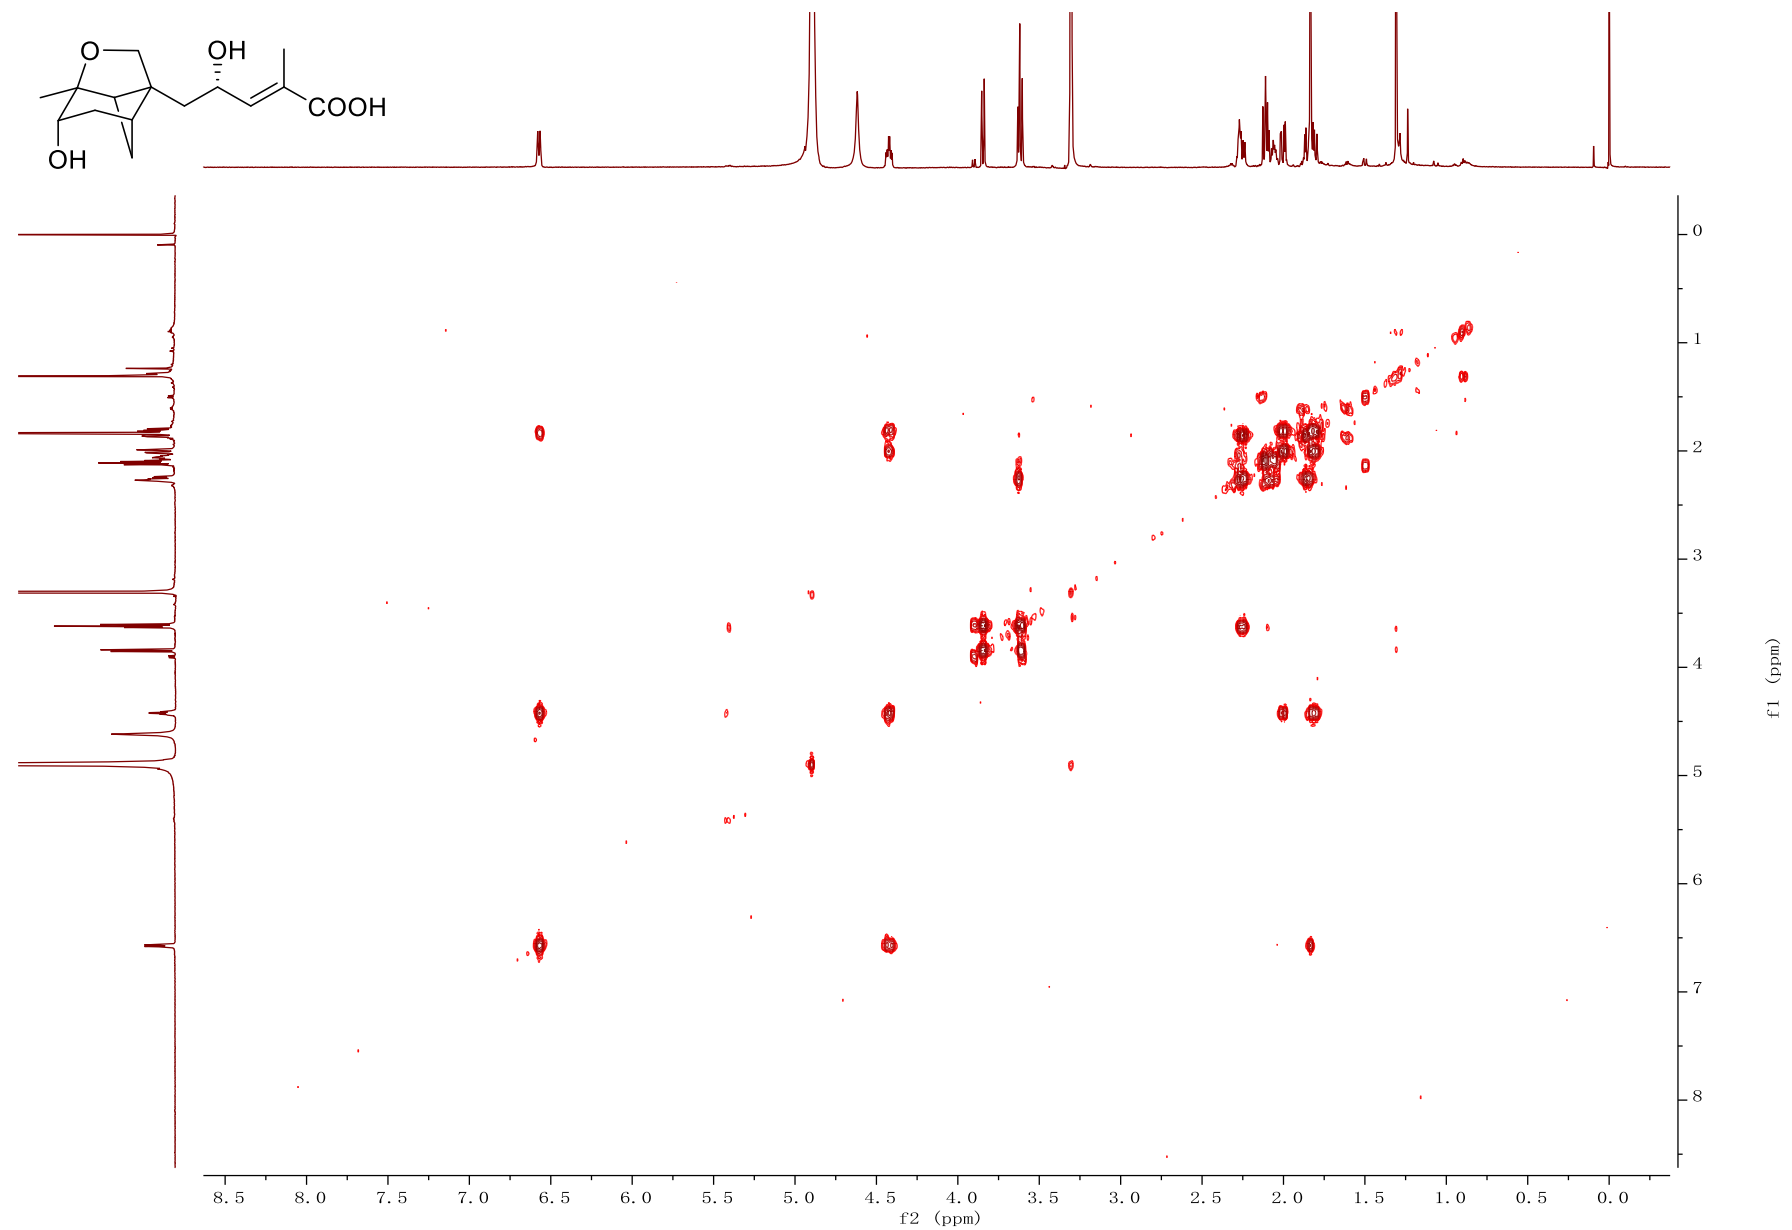

**Figure S99.** ROESY of compound **11** in CD<sub>3</sub>OD

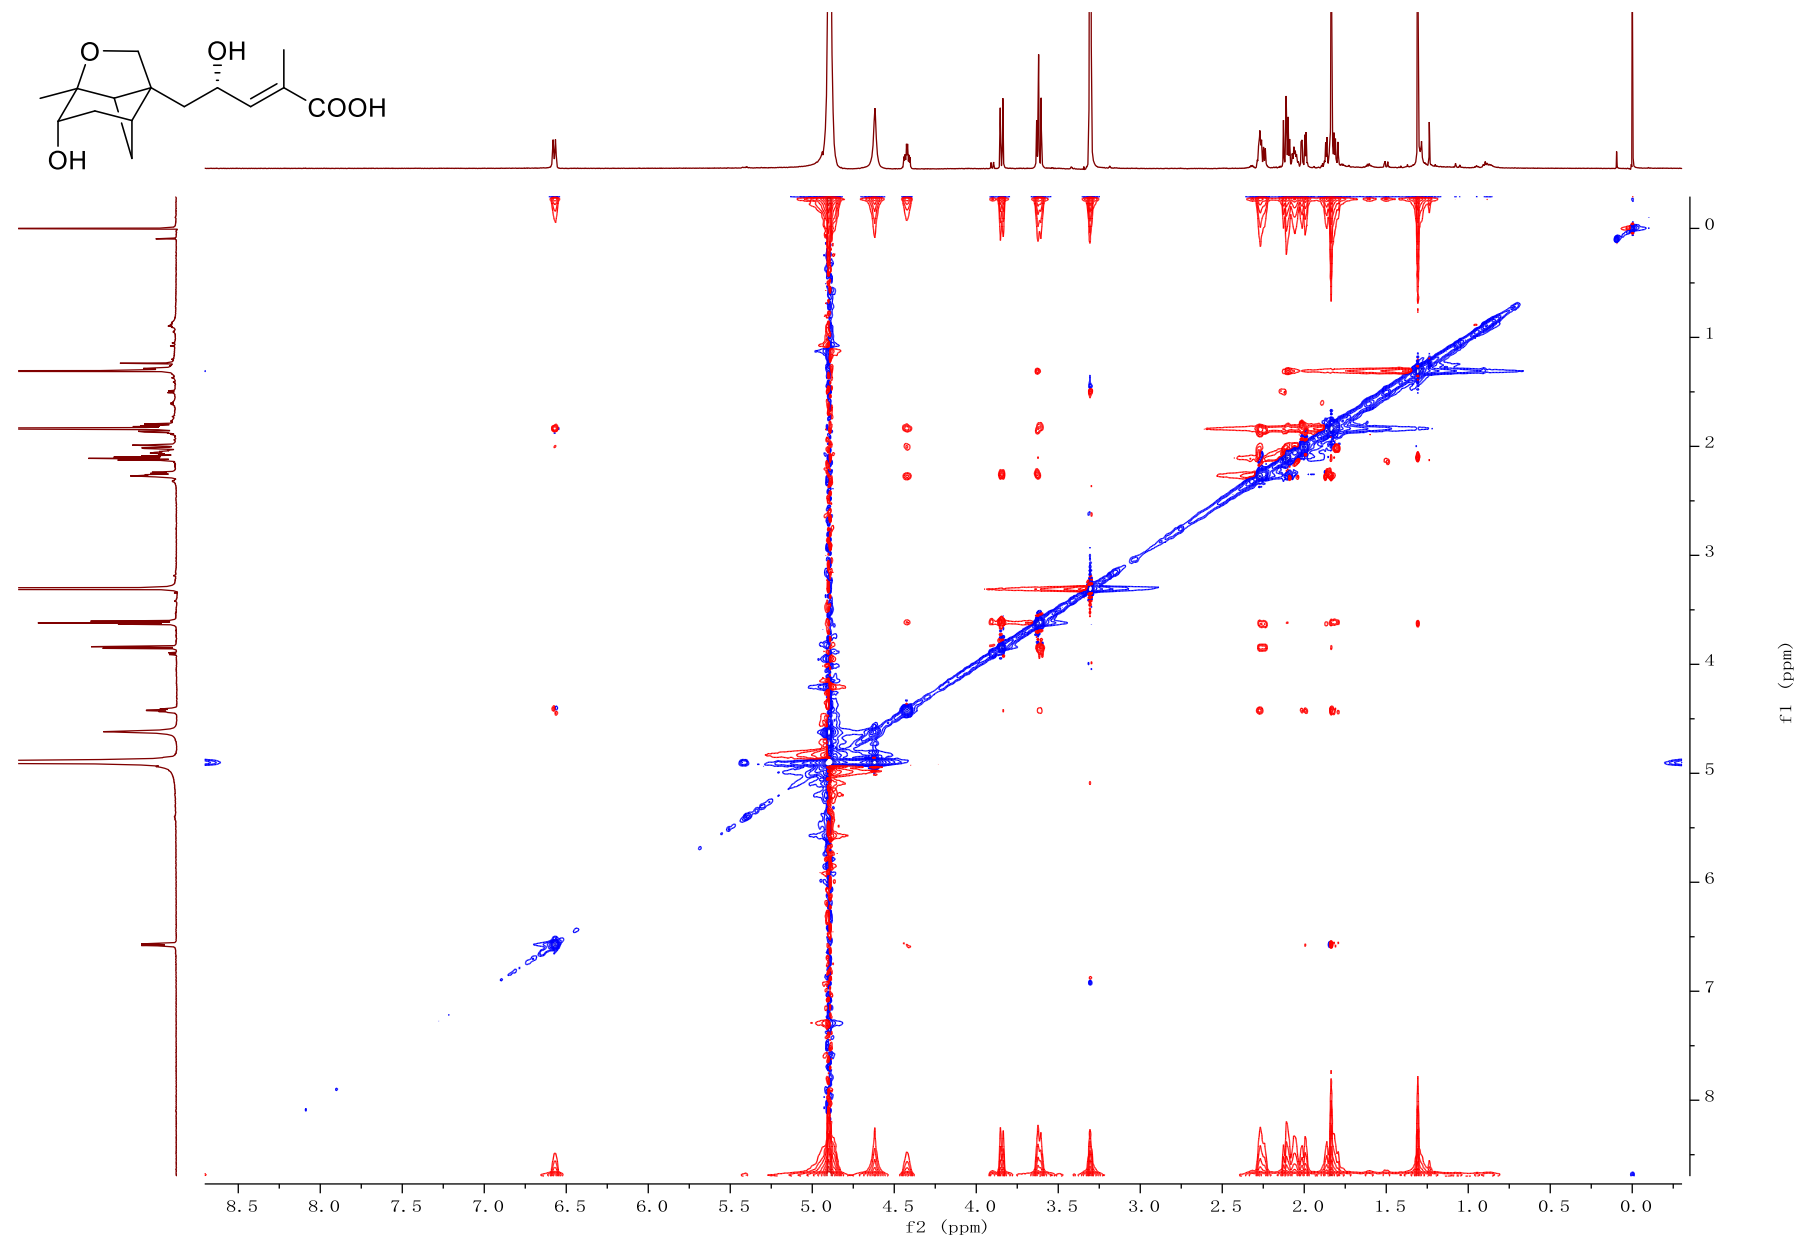

**Figure S100.** HR-ESIMS of compound **11**

FTMS + p ESI Full ms [150.0000-1100.0000]  
283.15136  
C<sub>15</sub>H<sub>23</sub>O<sub>5</sub>  
-9.30824 ppm

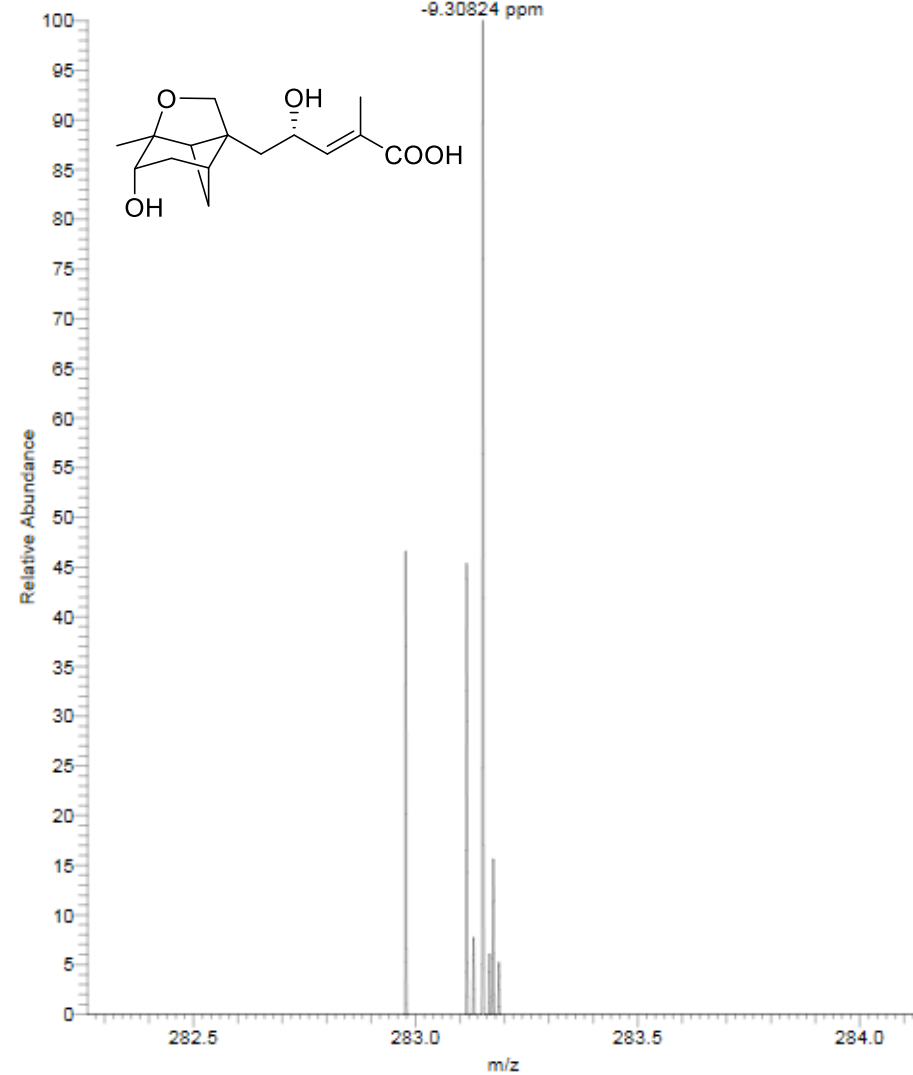



## Section S19. NMR and MS spectra for 12

Figure S101.  $^1\text{H}$  NMR of compound **12** in  $\text{CD}_3\text{OD}$

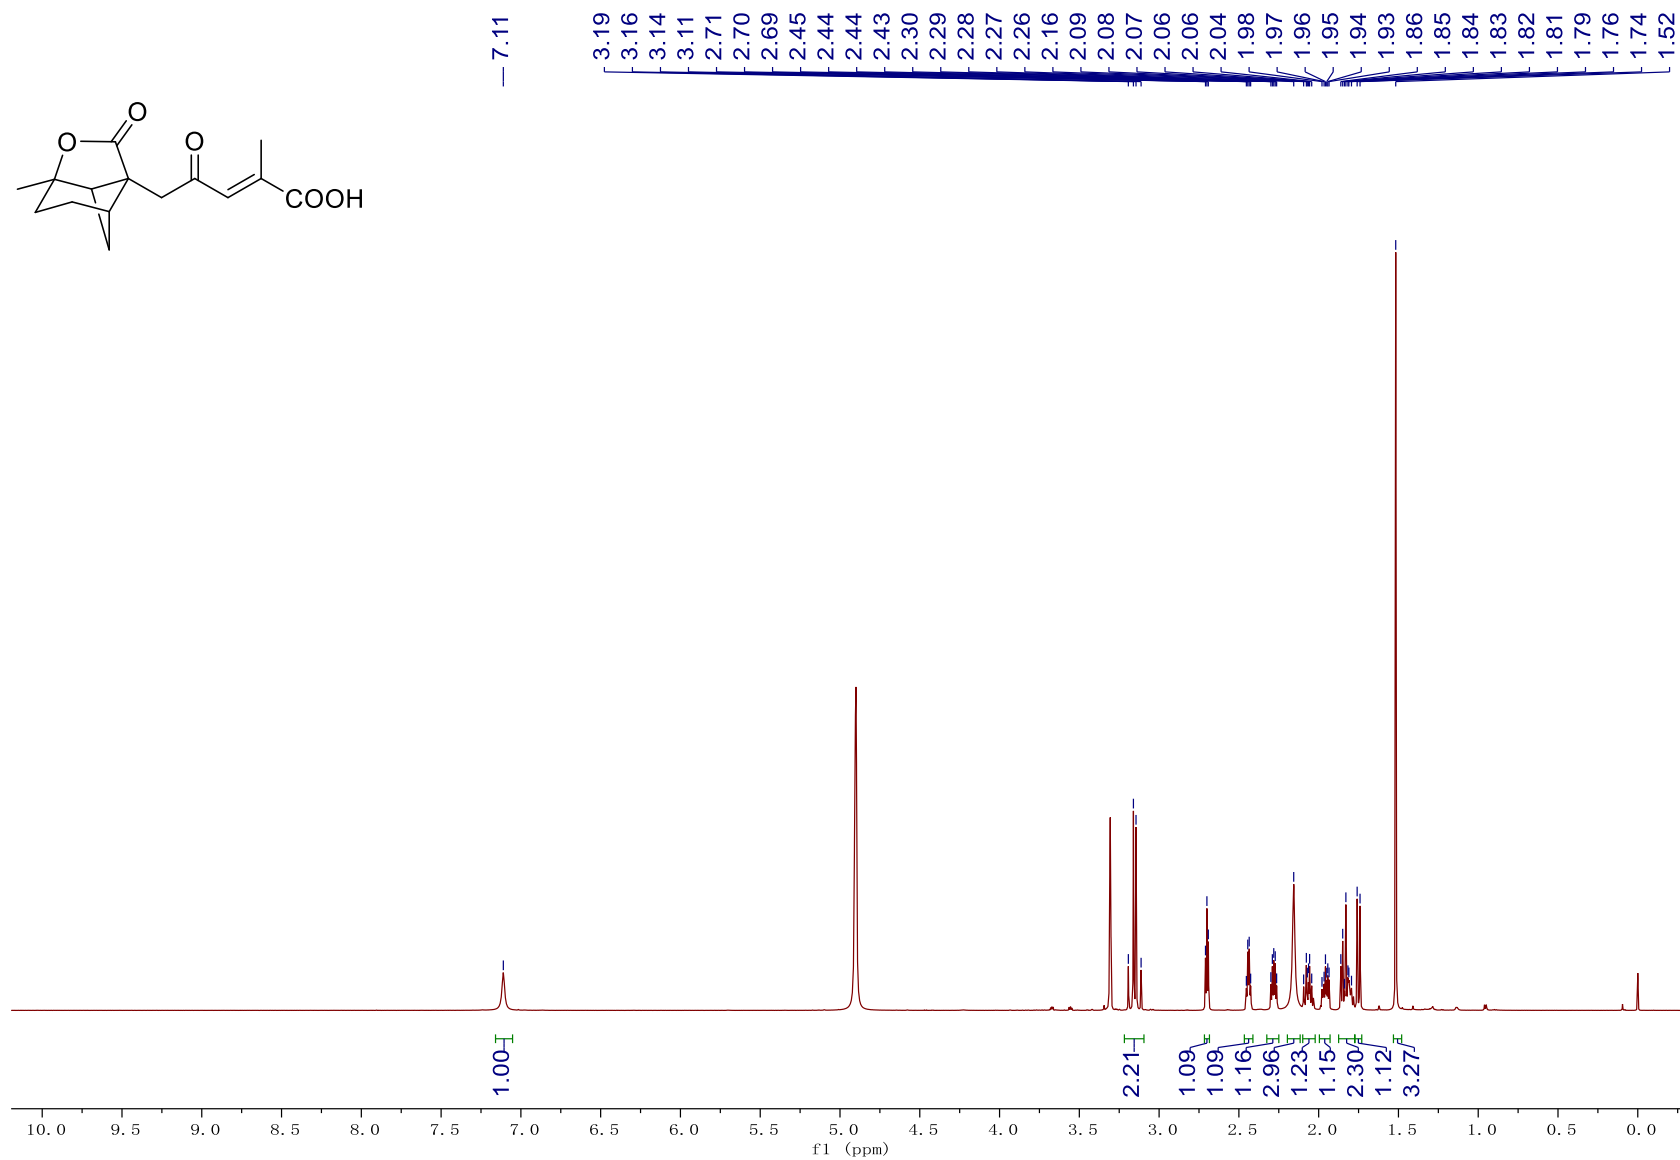

**Figure S102.**  $^{13}\text{C}$  NMR and DEPT of compound **12** in  $\text{CD}_3\text{OD}$

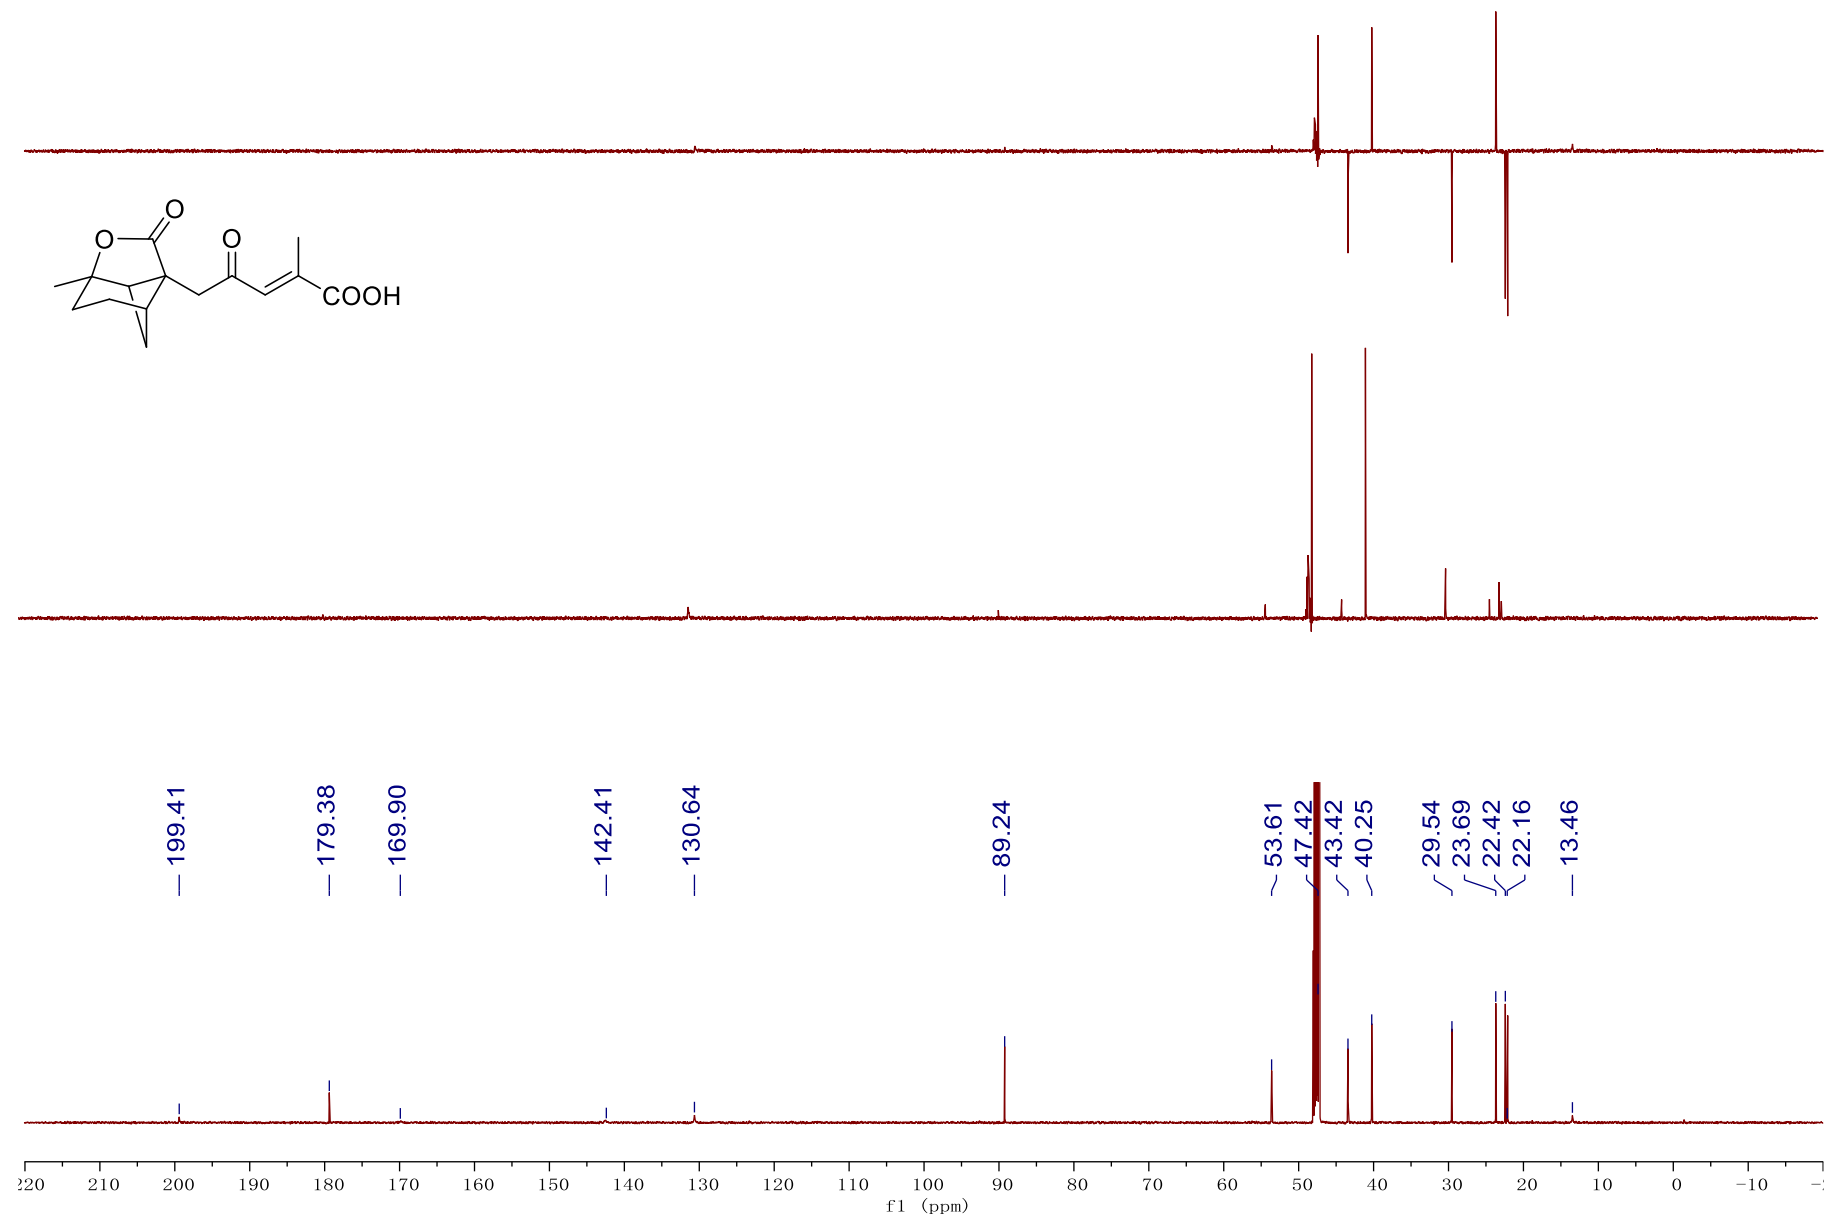

**Figure S103.** HSQC of compound **12** in CD<sub>3</sub>OD

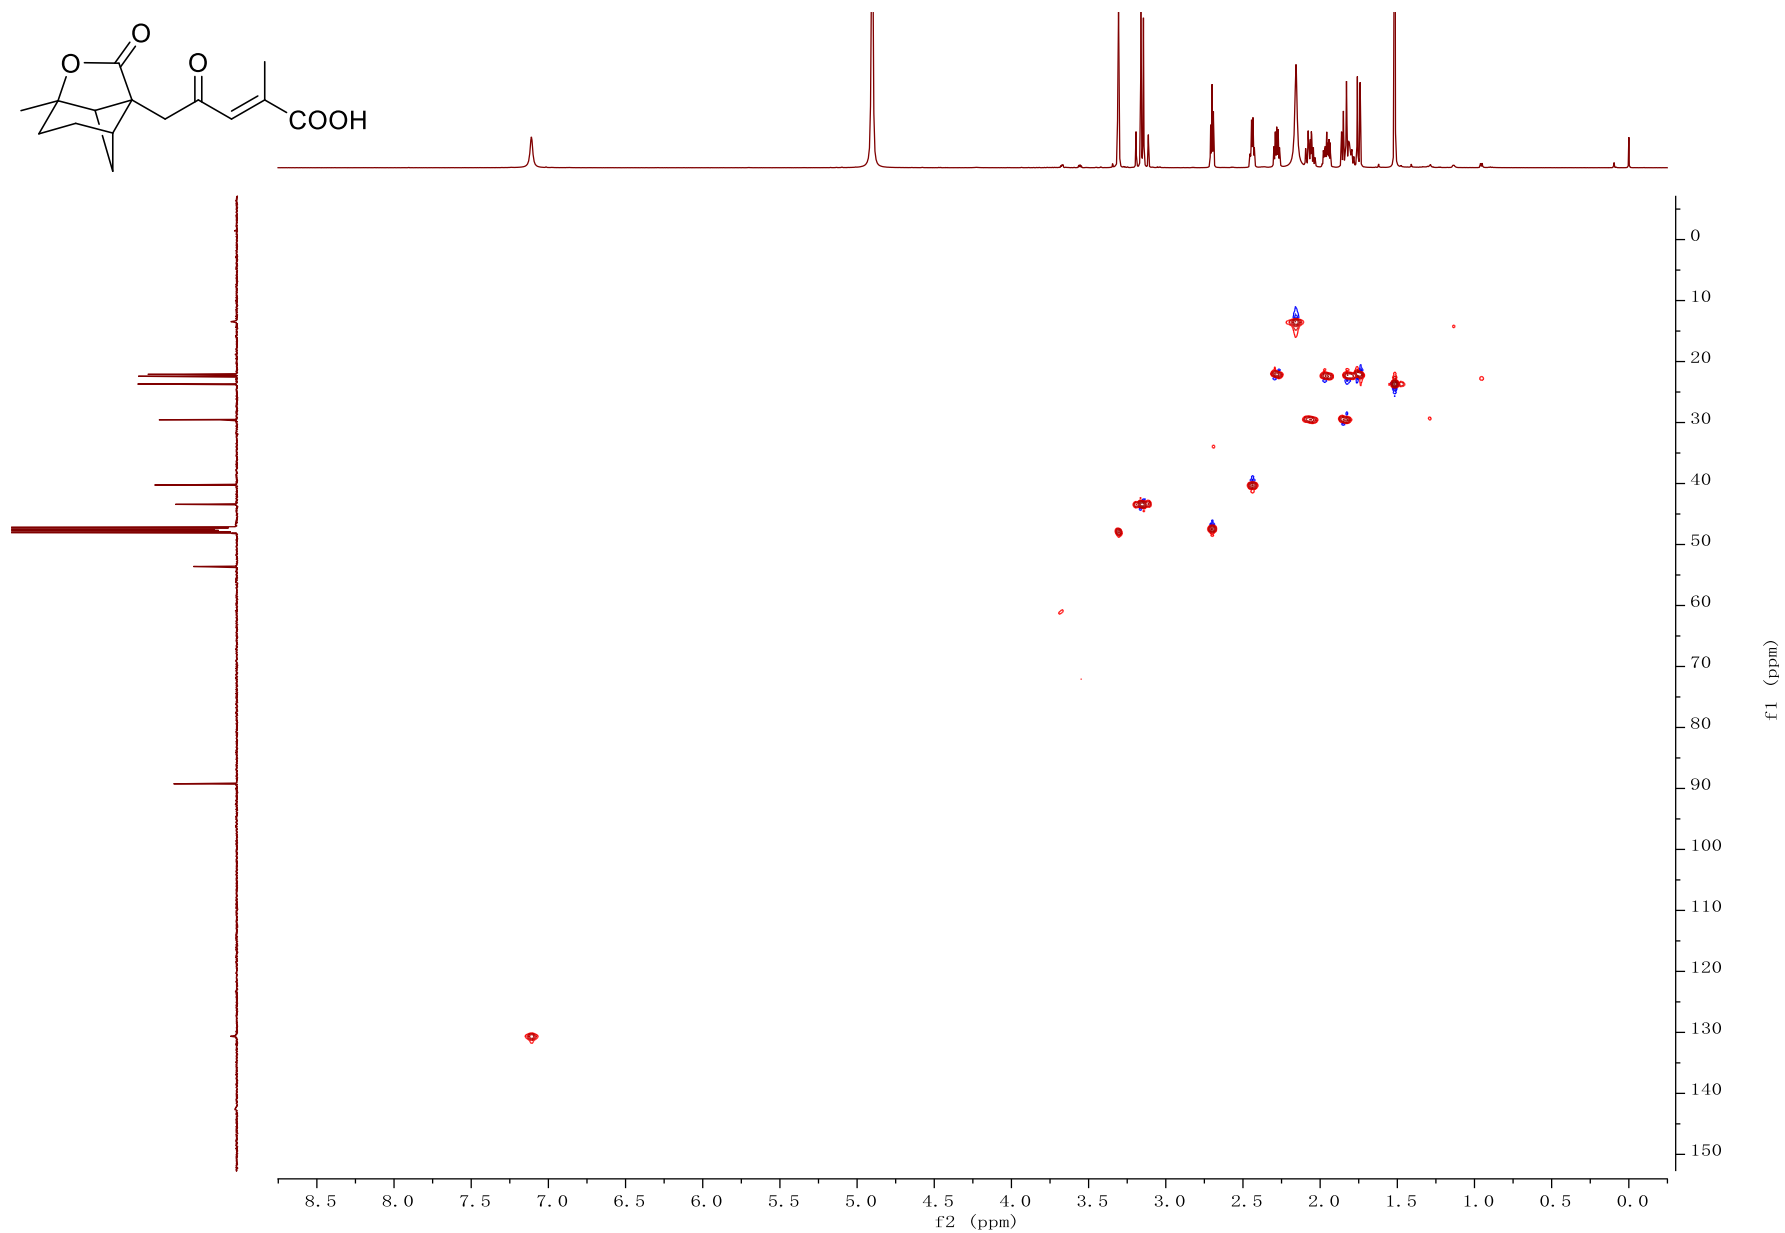

**Figure S104.** HMBC of compound **12** in CD<sub>3</sub>OD

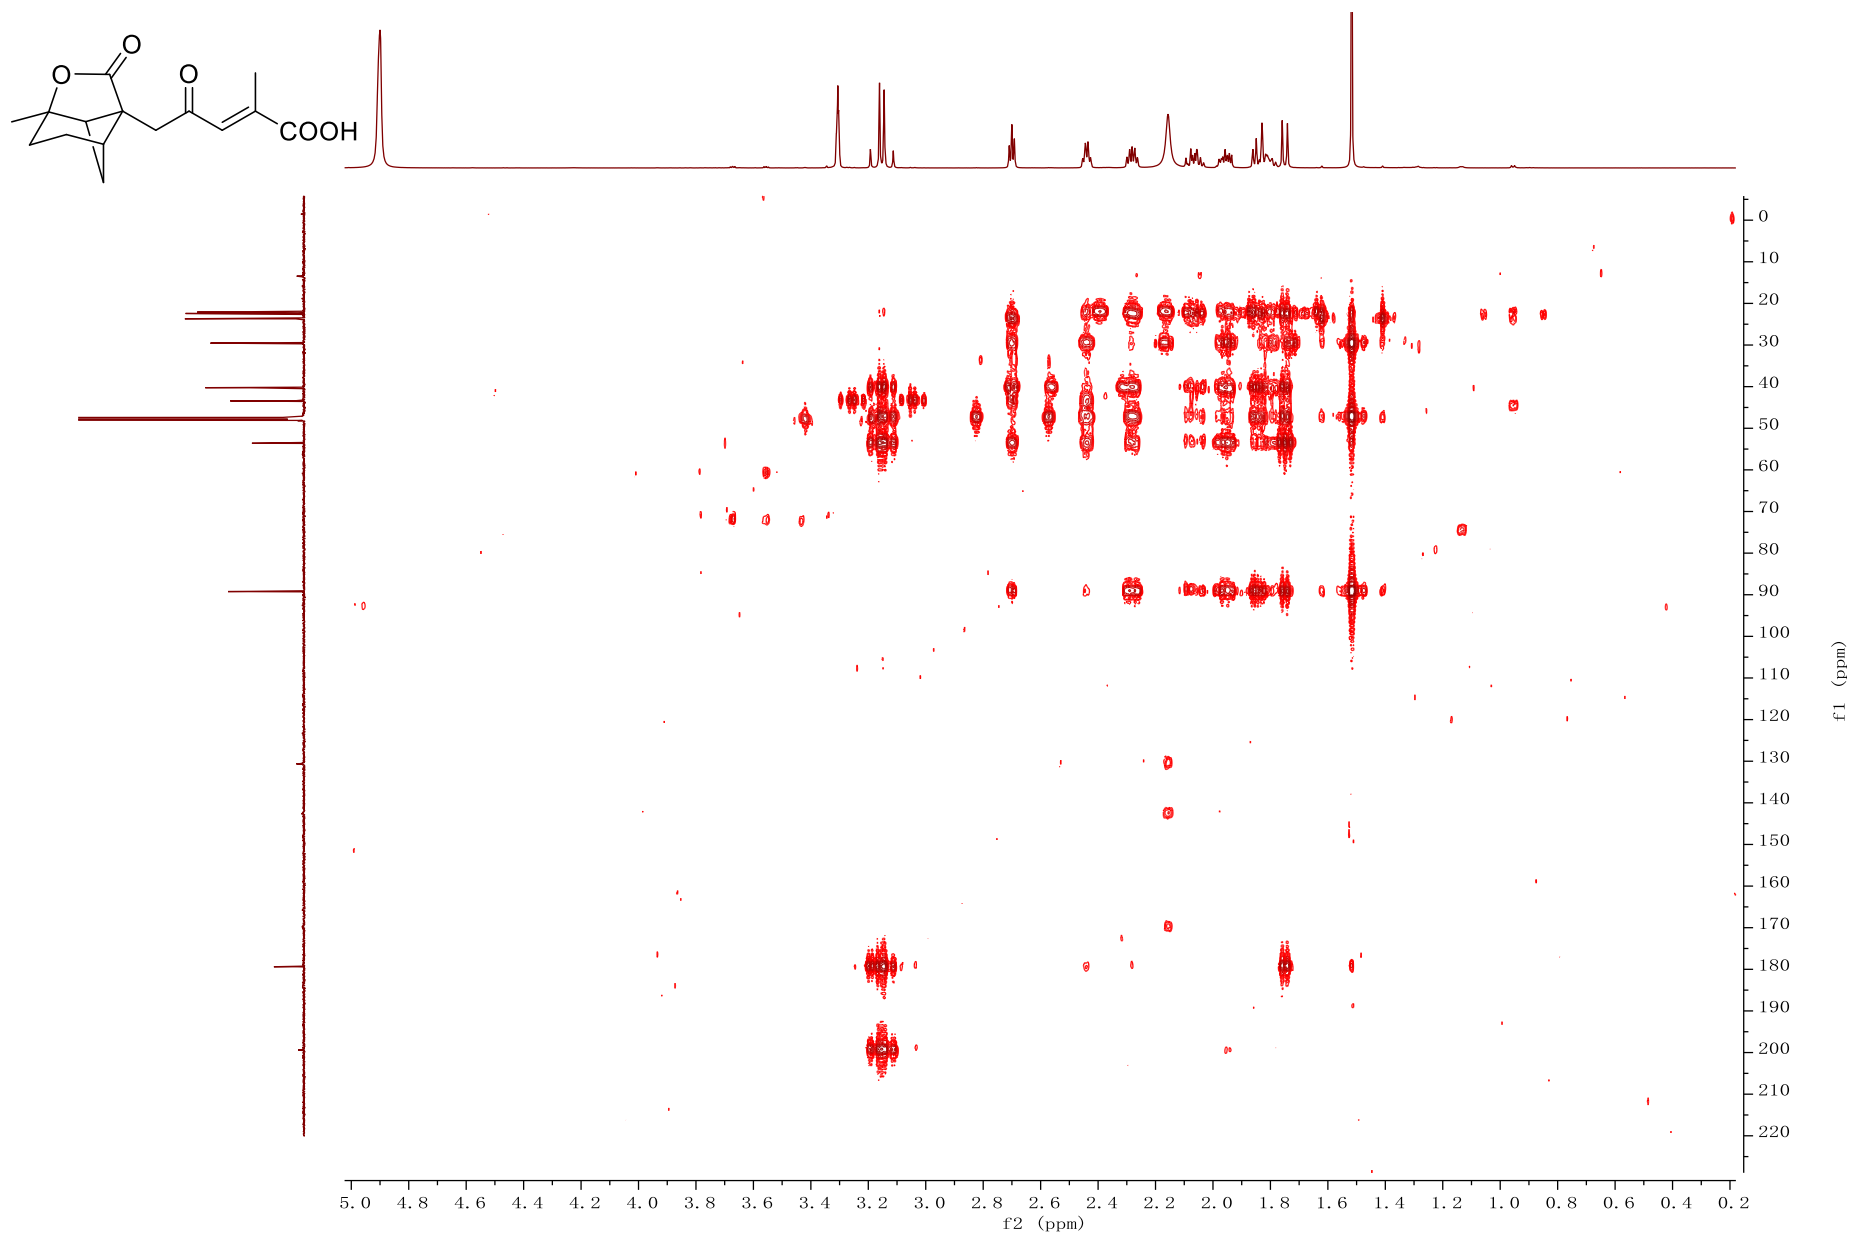

**Figure S105.**  $^1\text{H}$ - $^1\text{H}$  COSY of compound **12** in  $\text{CD}_3\text{OD}$

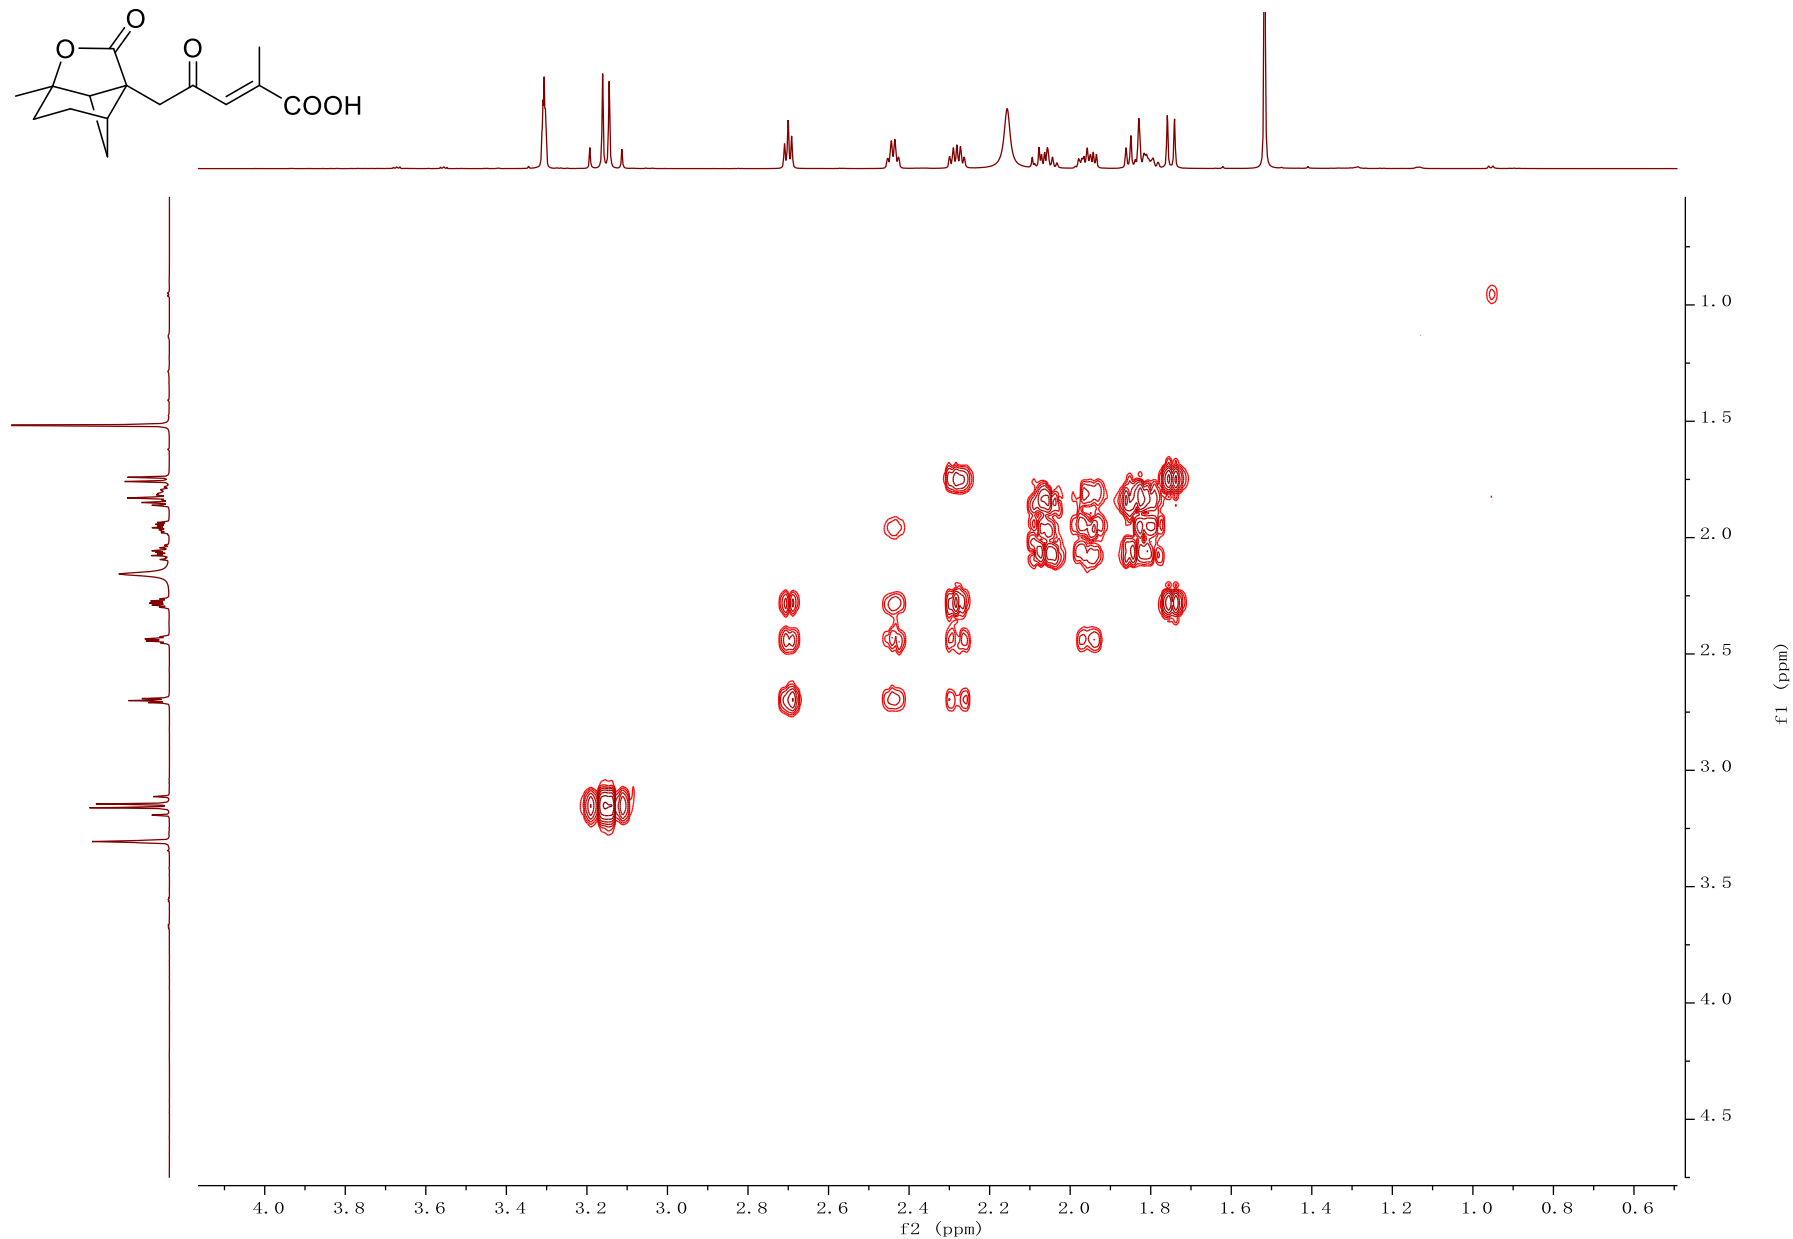

**Figure S106.** ROESY of compound **12** in CD<sub>3</sub>OD

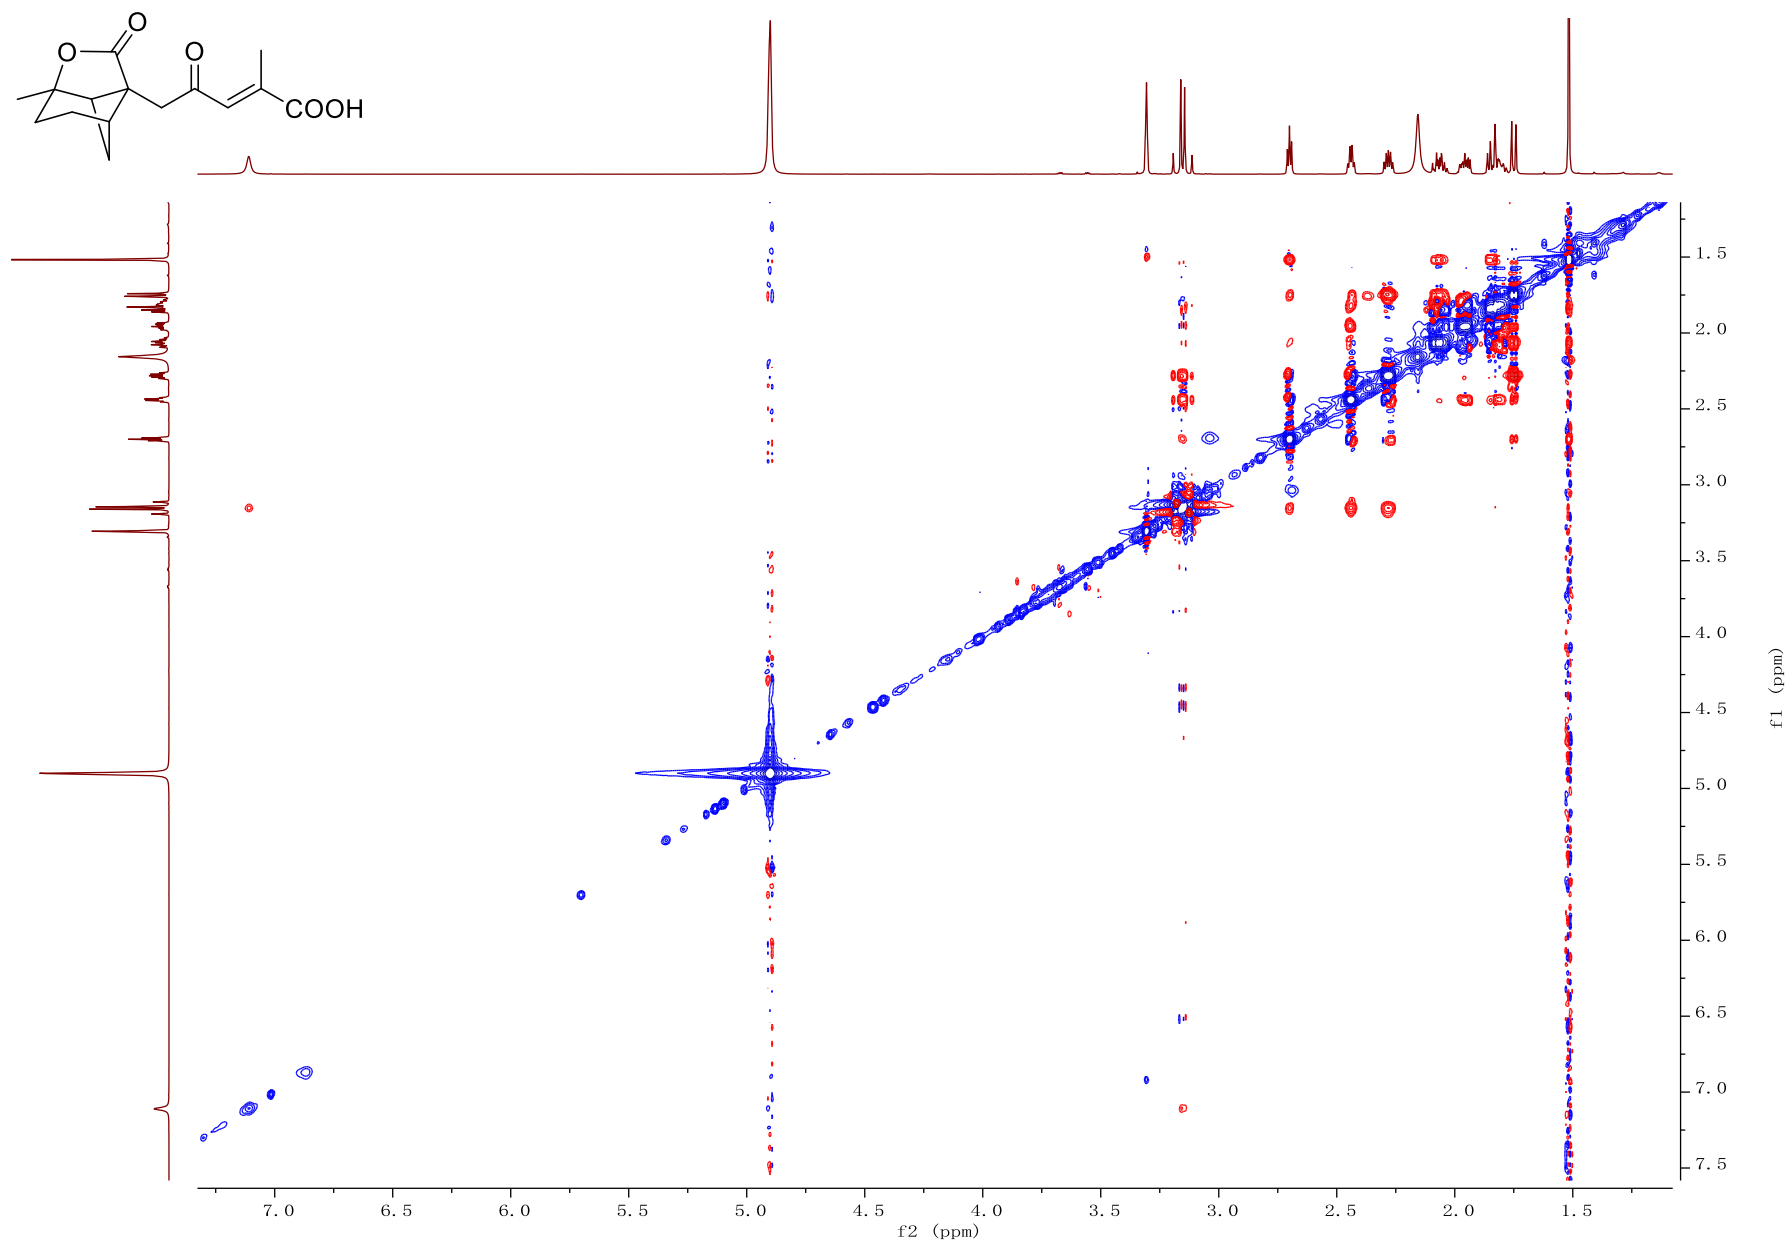

**Figure S107.** HR-ESIMS of compound **12**

FTMS + p ESI Full lock ms [100.0000-850.0000]

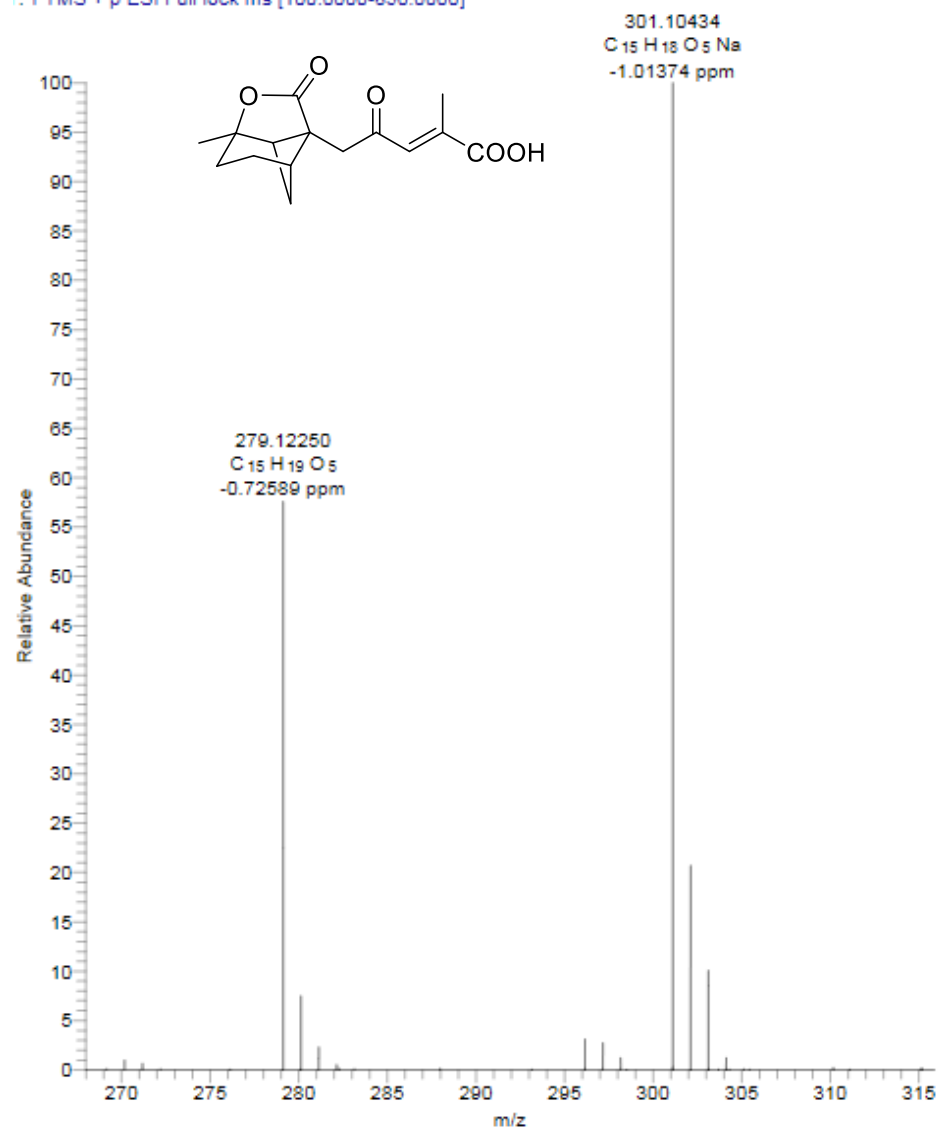

## Section S20. NMR and MS spectra for 13

Figure S108.  $^1\text{H}$  NMR of compound **13** in  $\text{CD}_3\text{OD}$

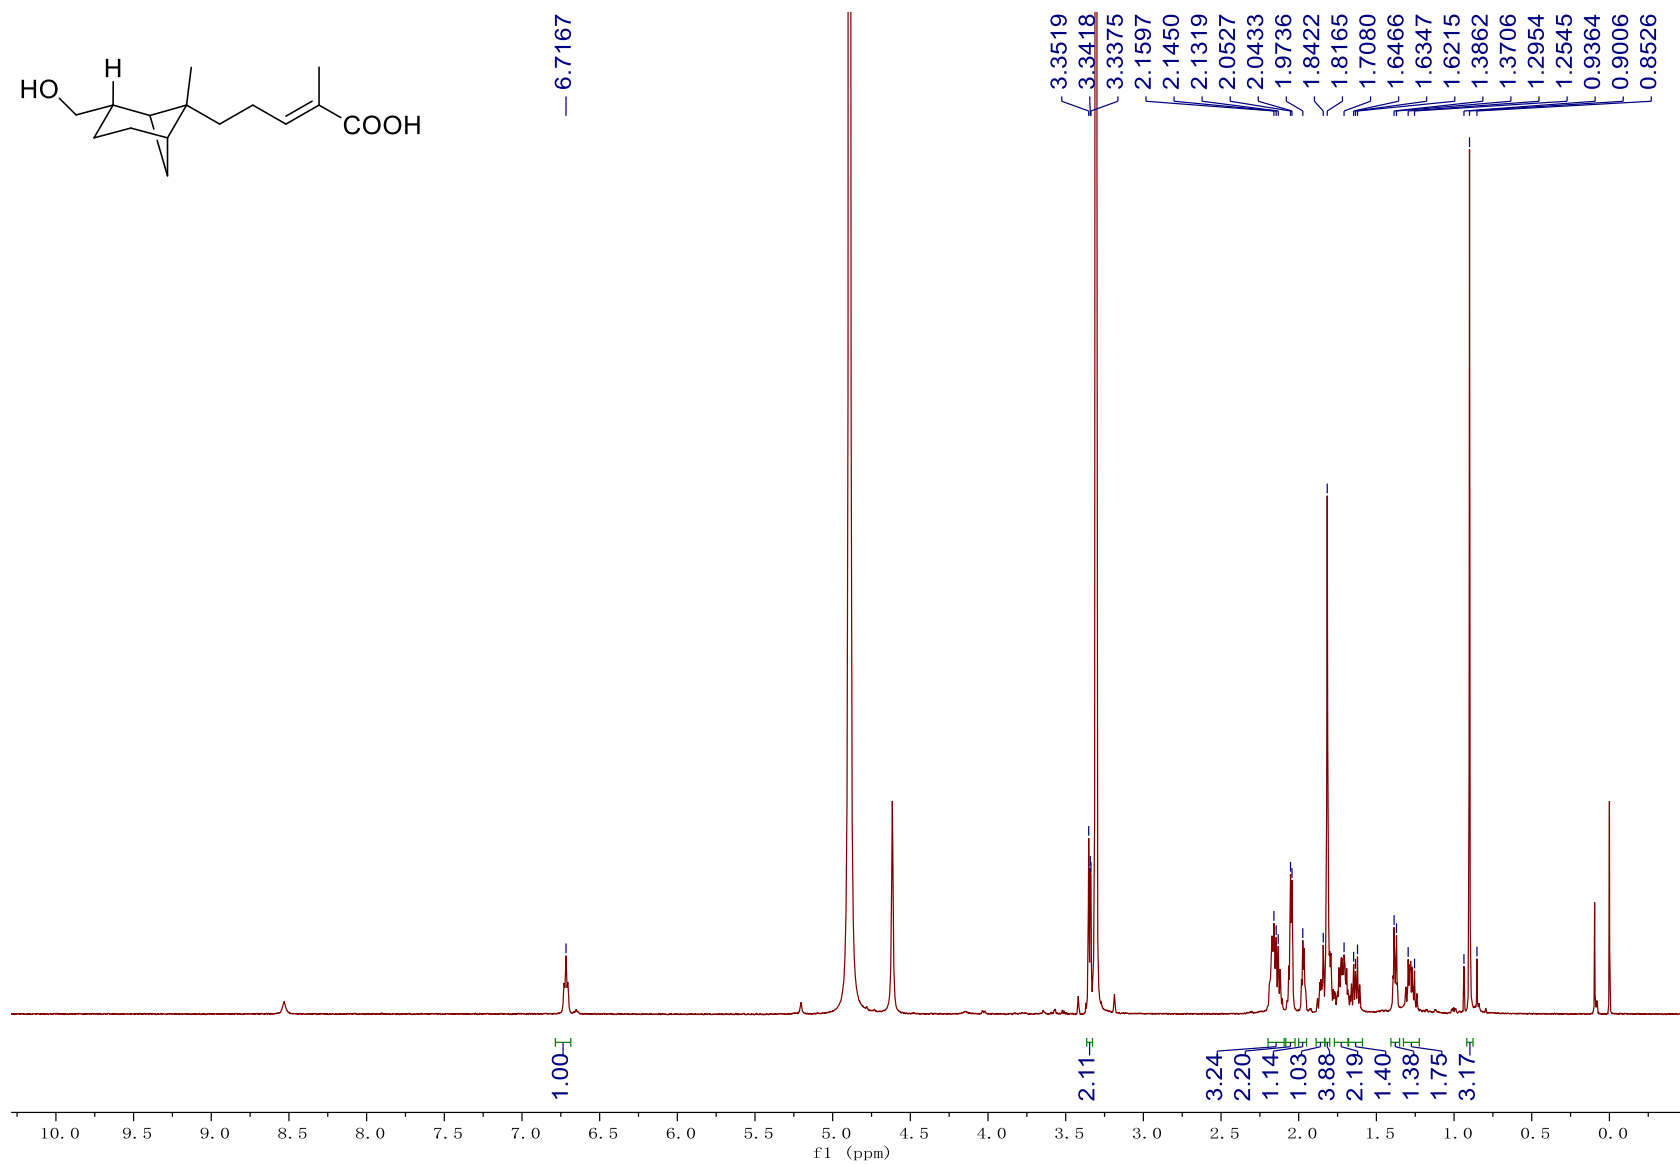



**Figure S109.**  $^{13}\text{C}$  NMR and DEPT of compound **13** in  $\text{CD}_3\text{OD}$

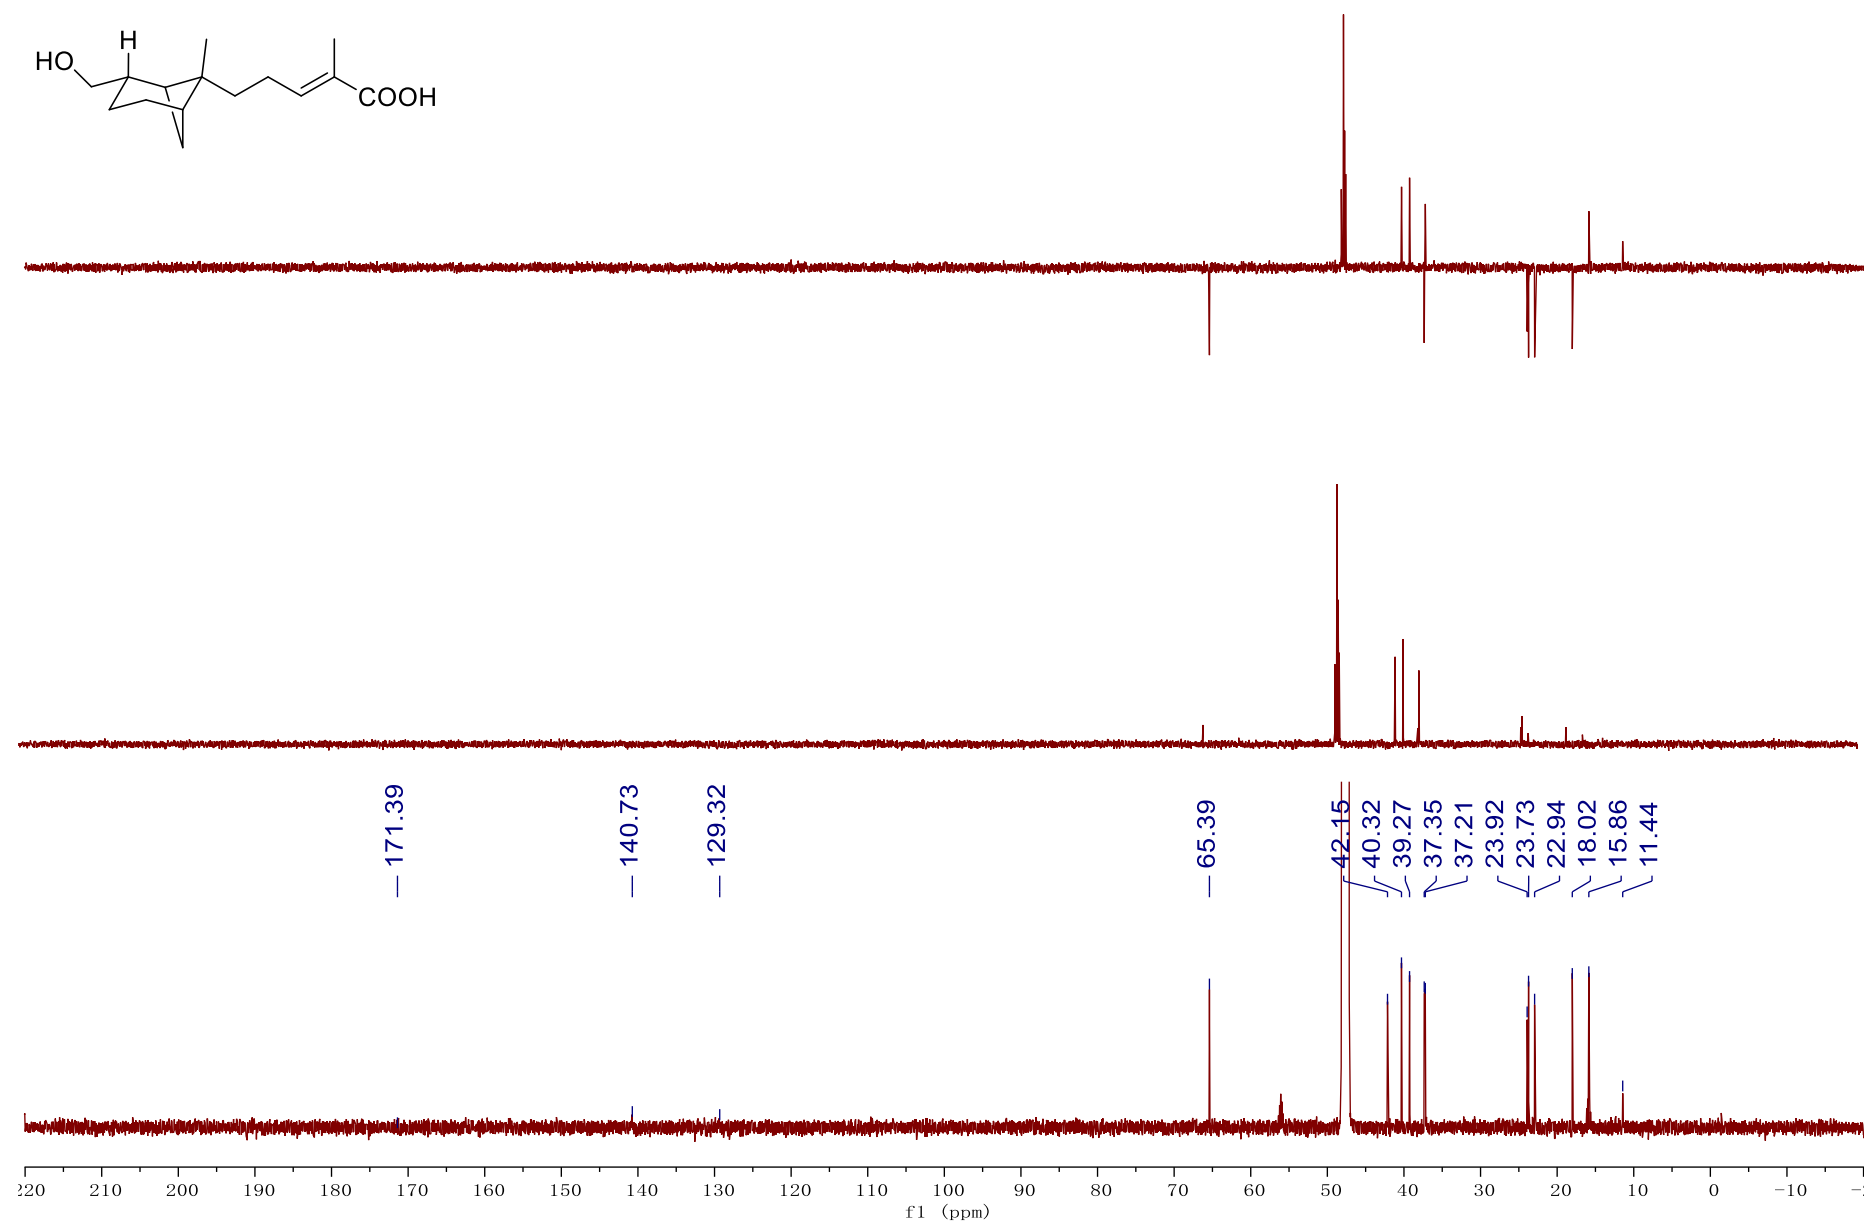

**Figure S110.** HSQC of compound **13** in CD<sub>3</sub>OD

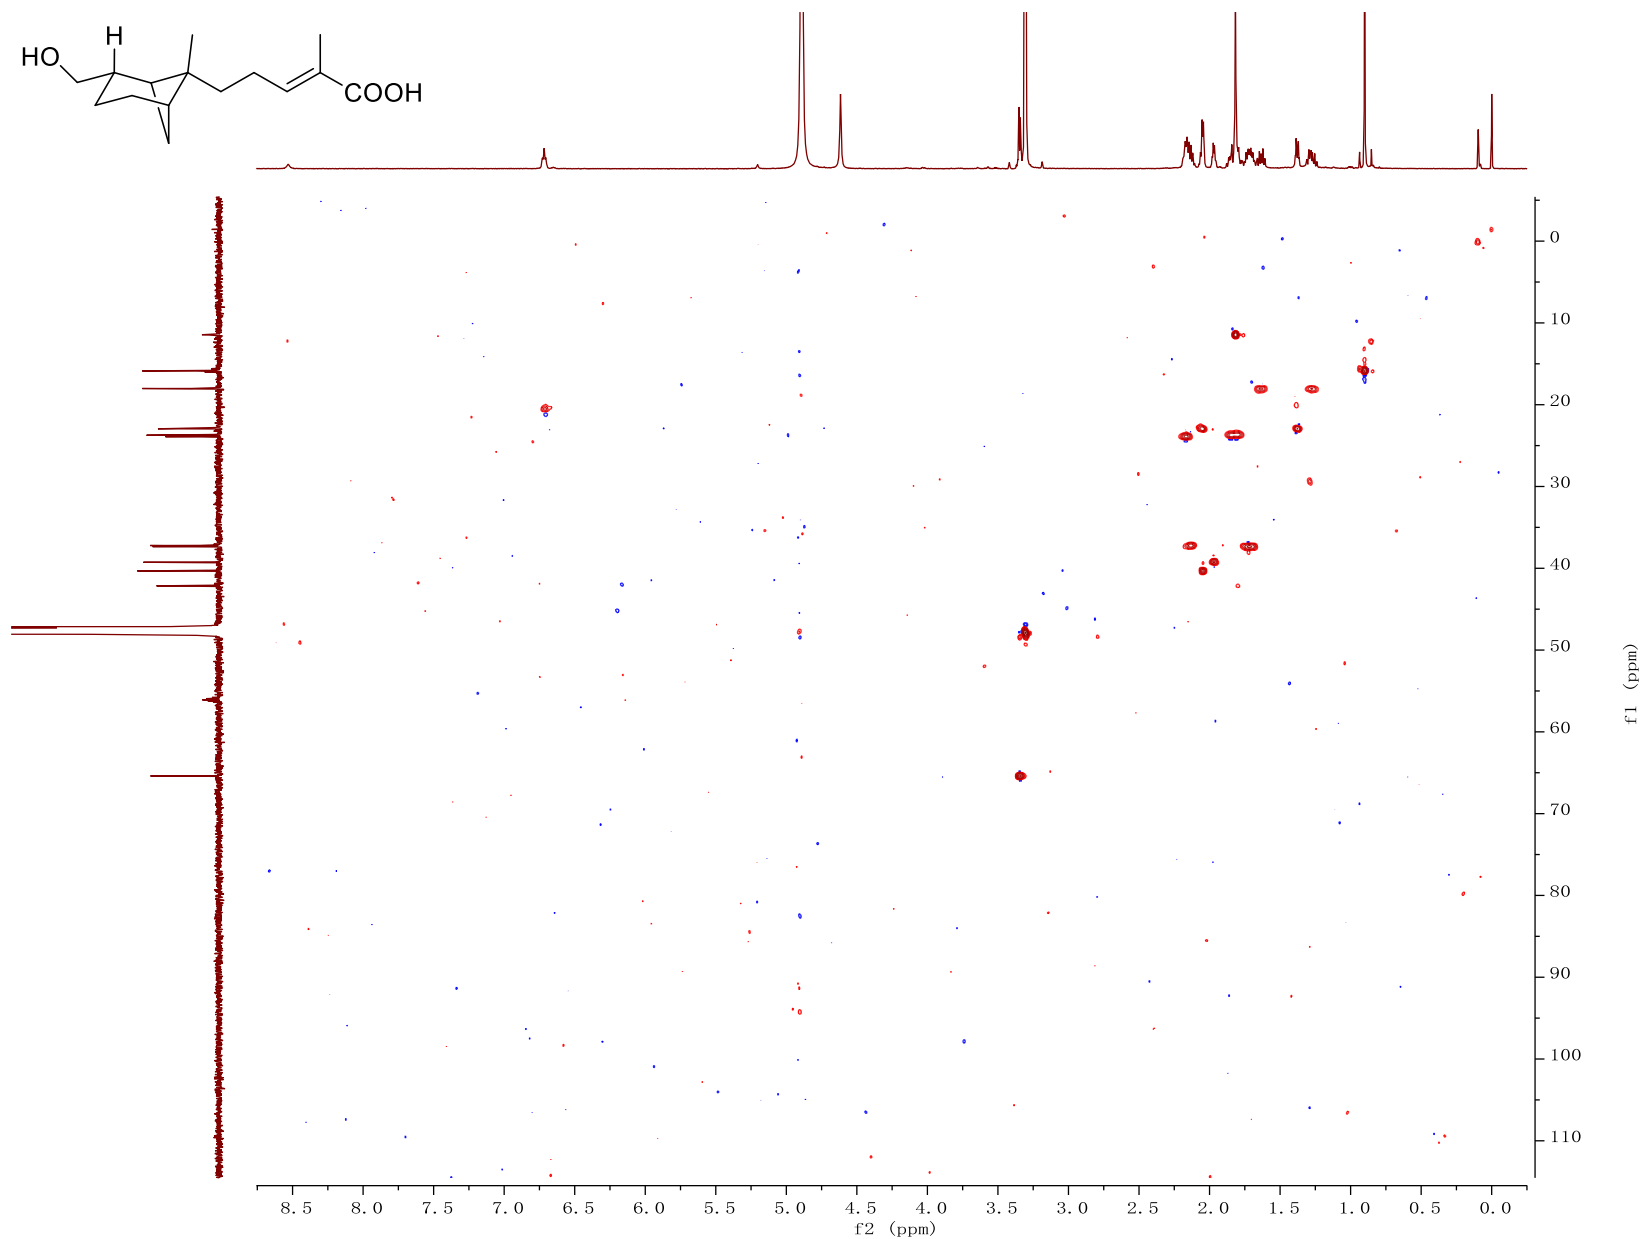

**Figure S111.** HMBC of compound **13** in CD<sub>3</sub>OD

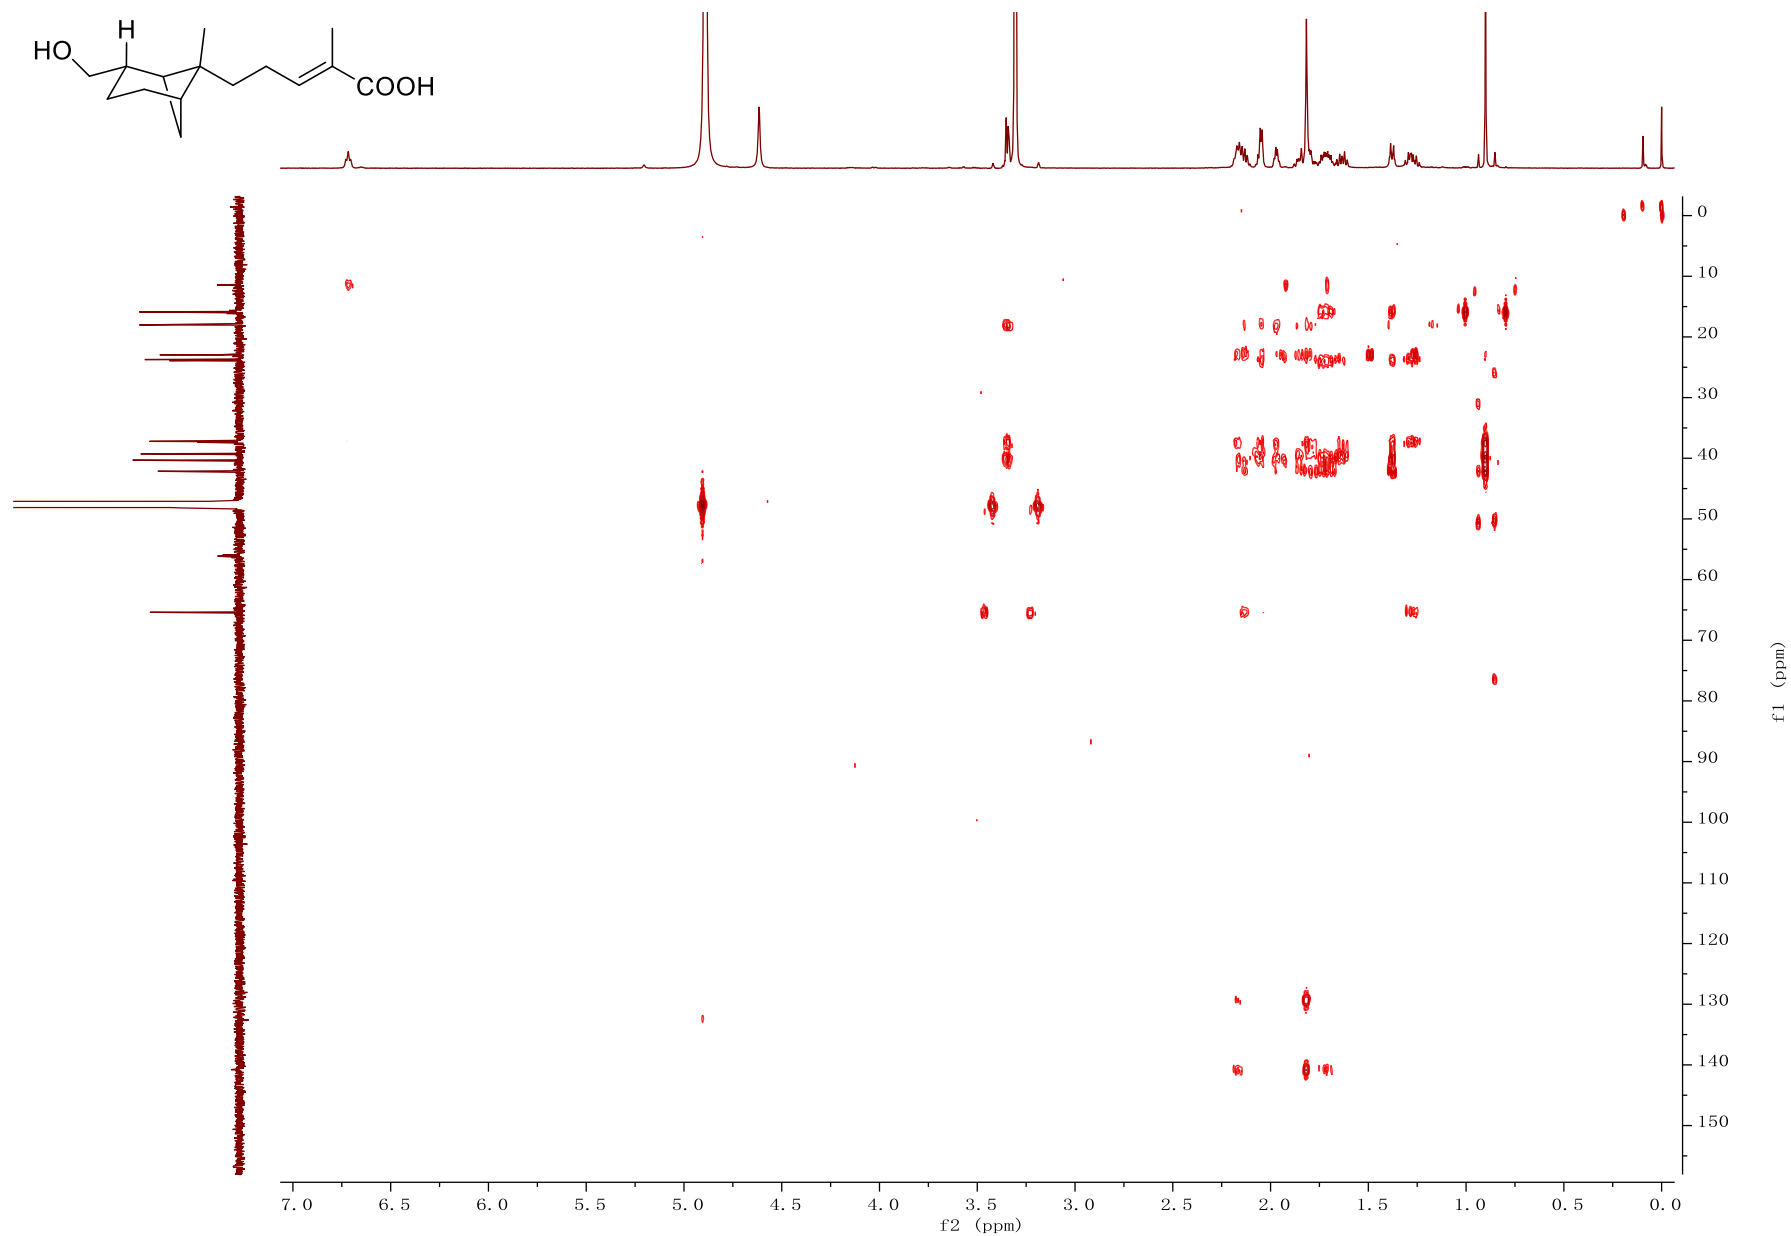

**Figure S112.**  $^1\text{H}$ - $^1\text{H}$  COSY of compound **13** in  $\text{CD}_3\text{OD}$

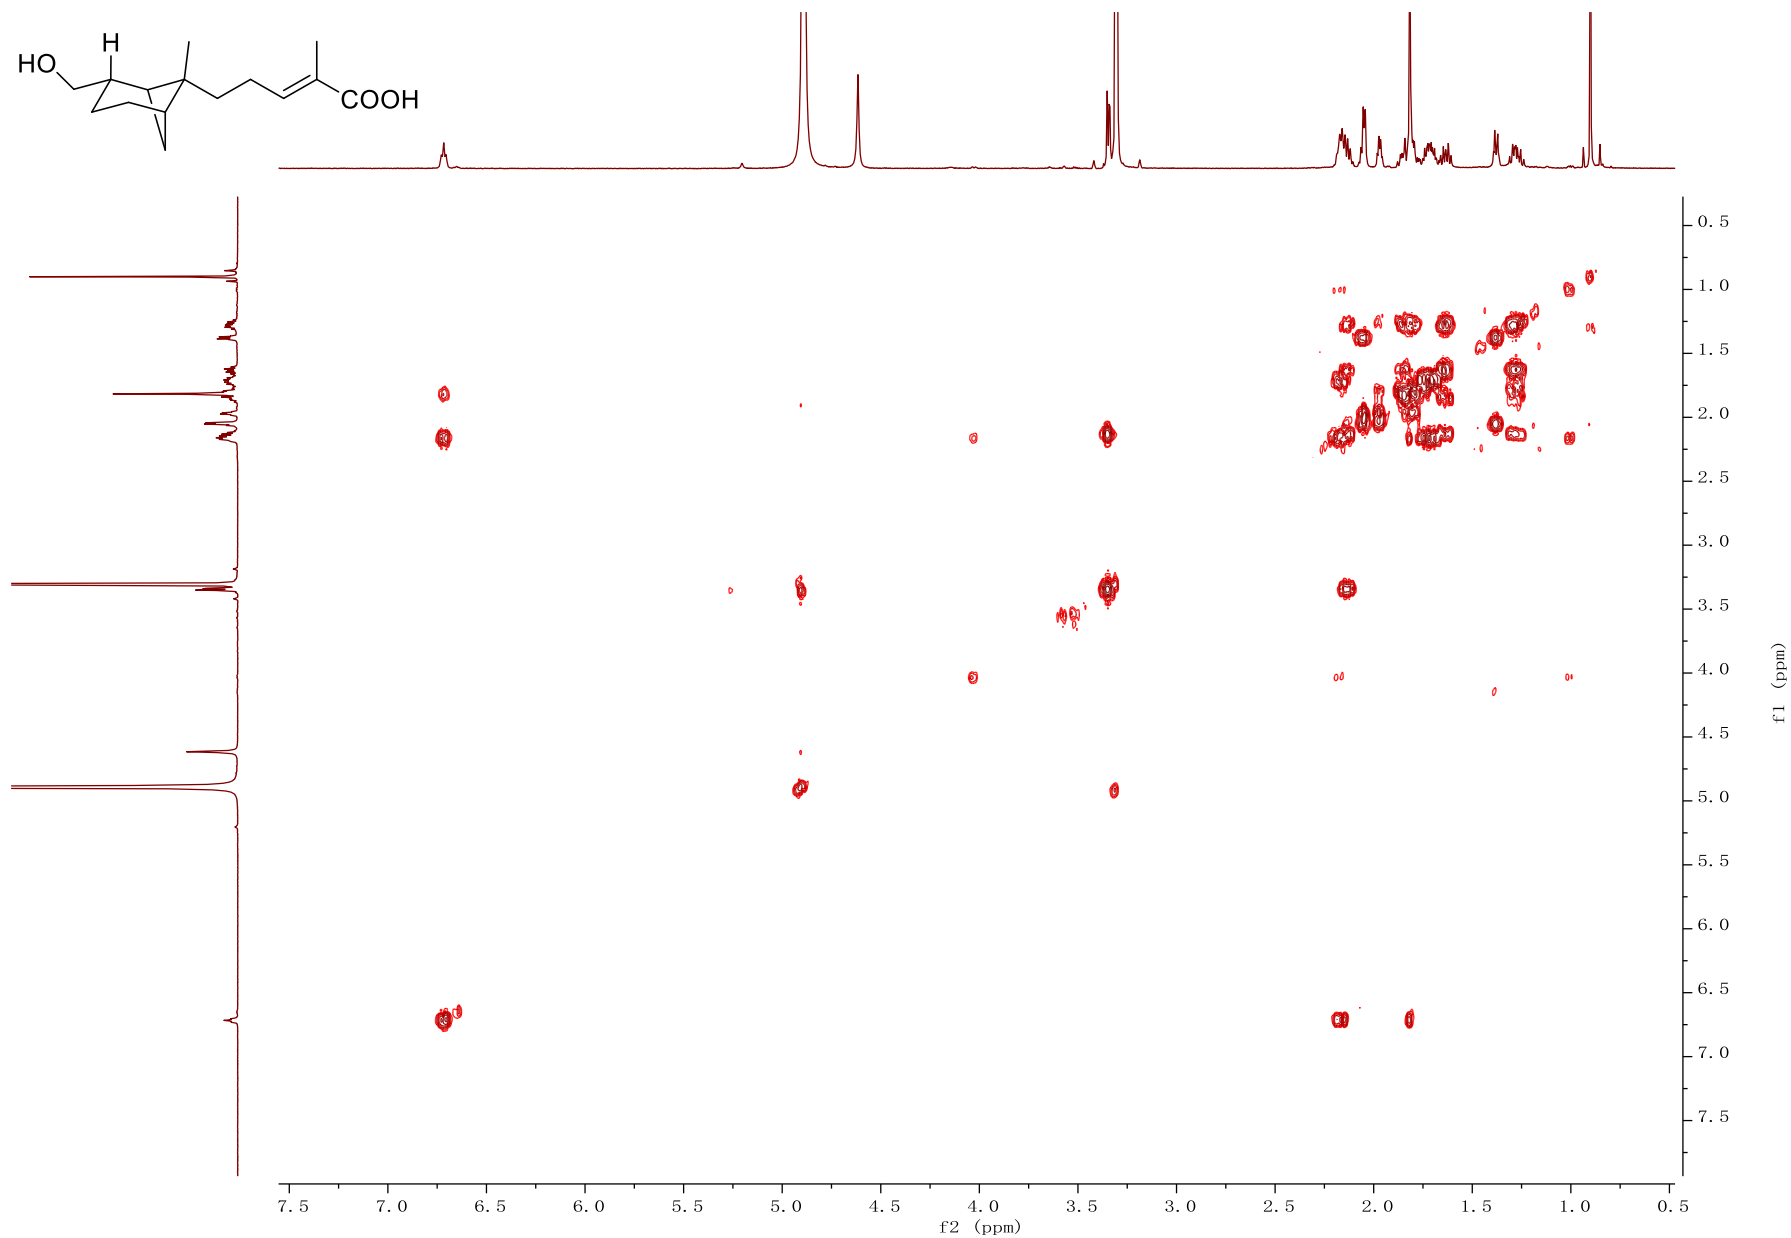

**Figure S113.** ROESY of compound **13** in CD<sub>3</sub>OD

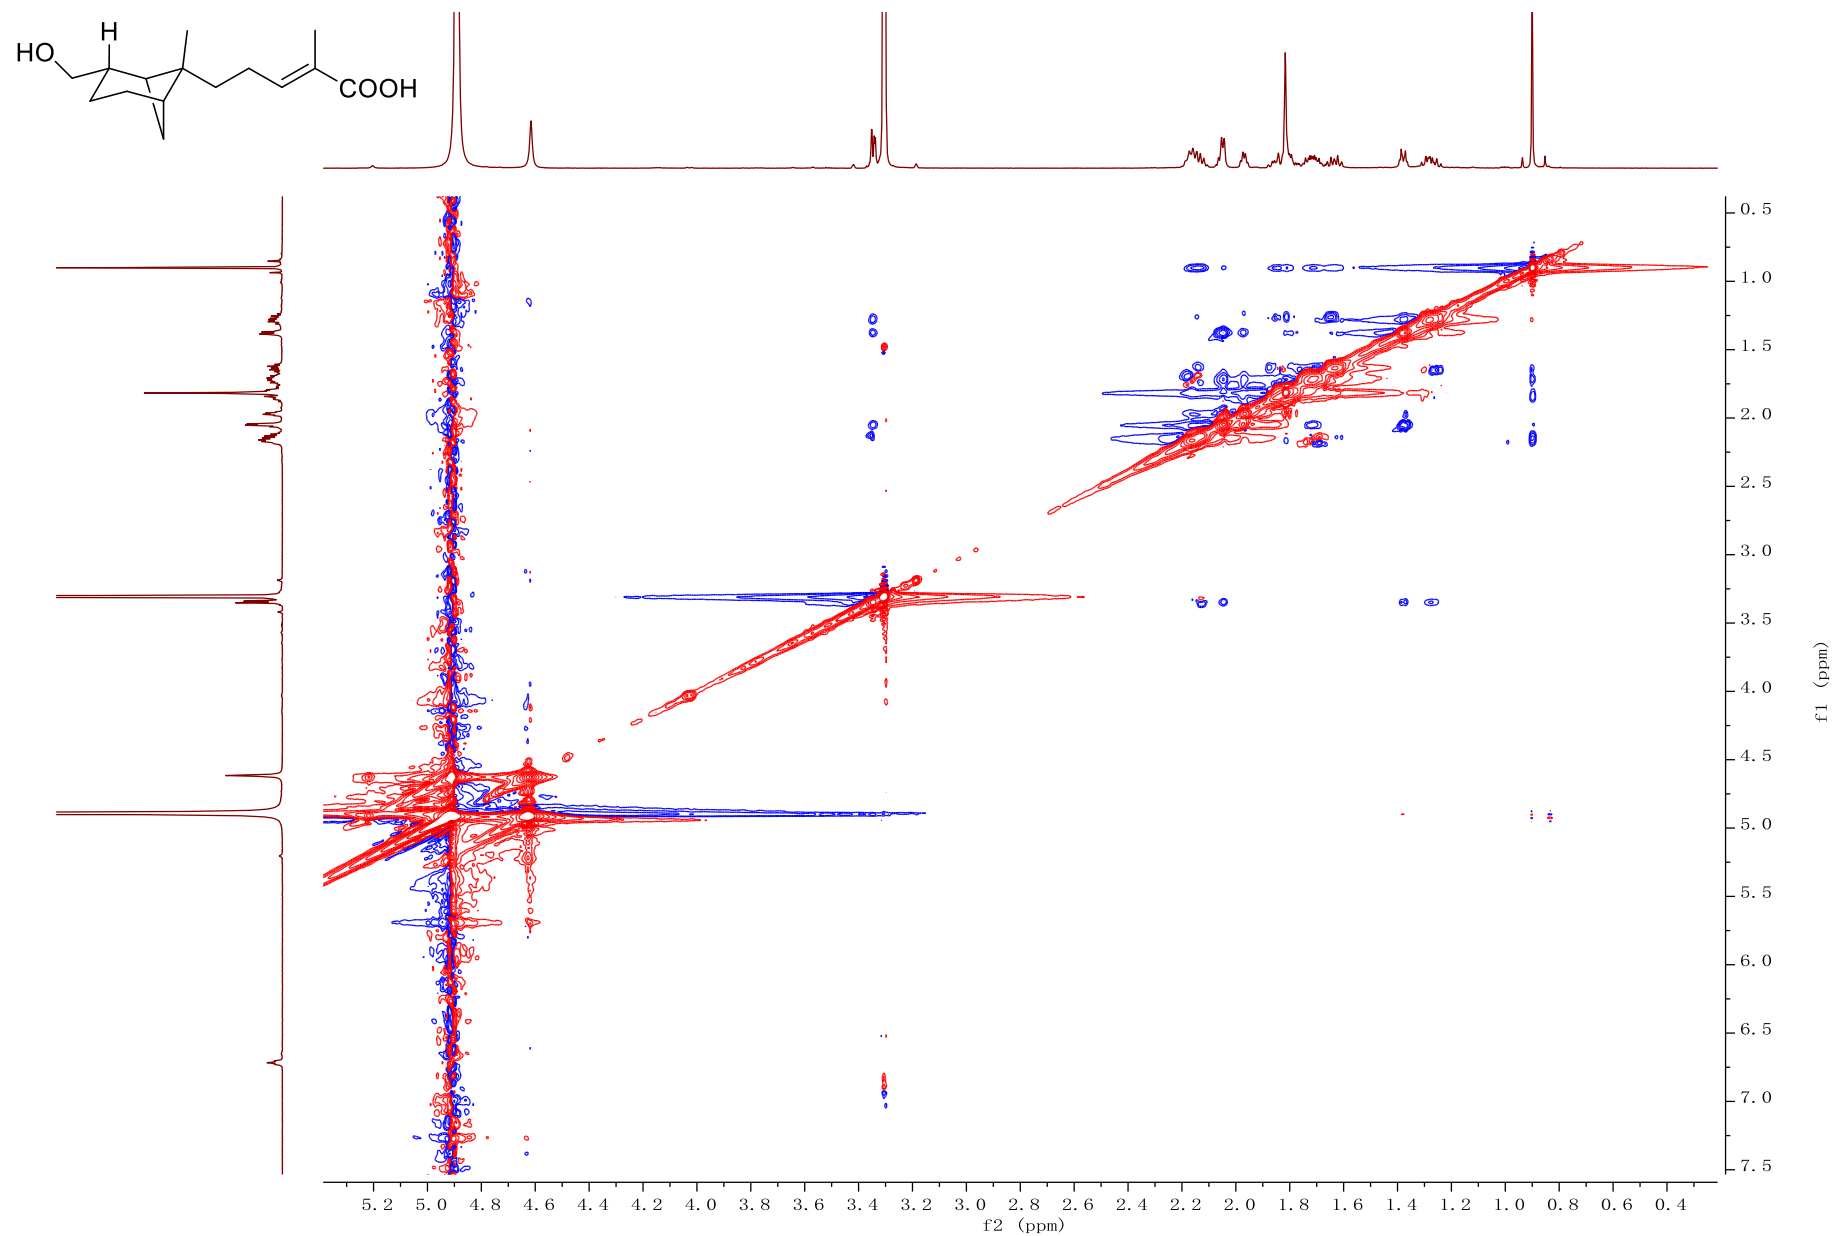

**Figure S114.** HR-ESIMS of compound **13**

T: FTMS + p ESI Full lock ms [150.0000-600.0000]

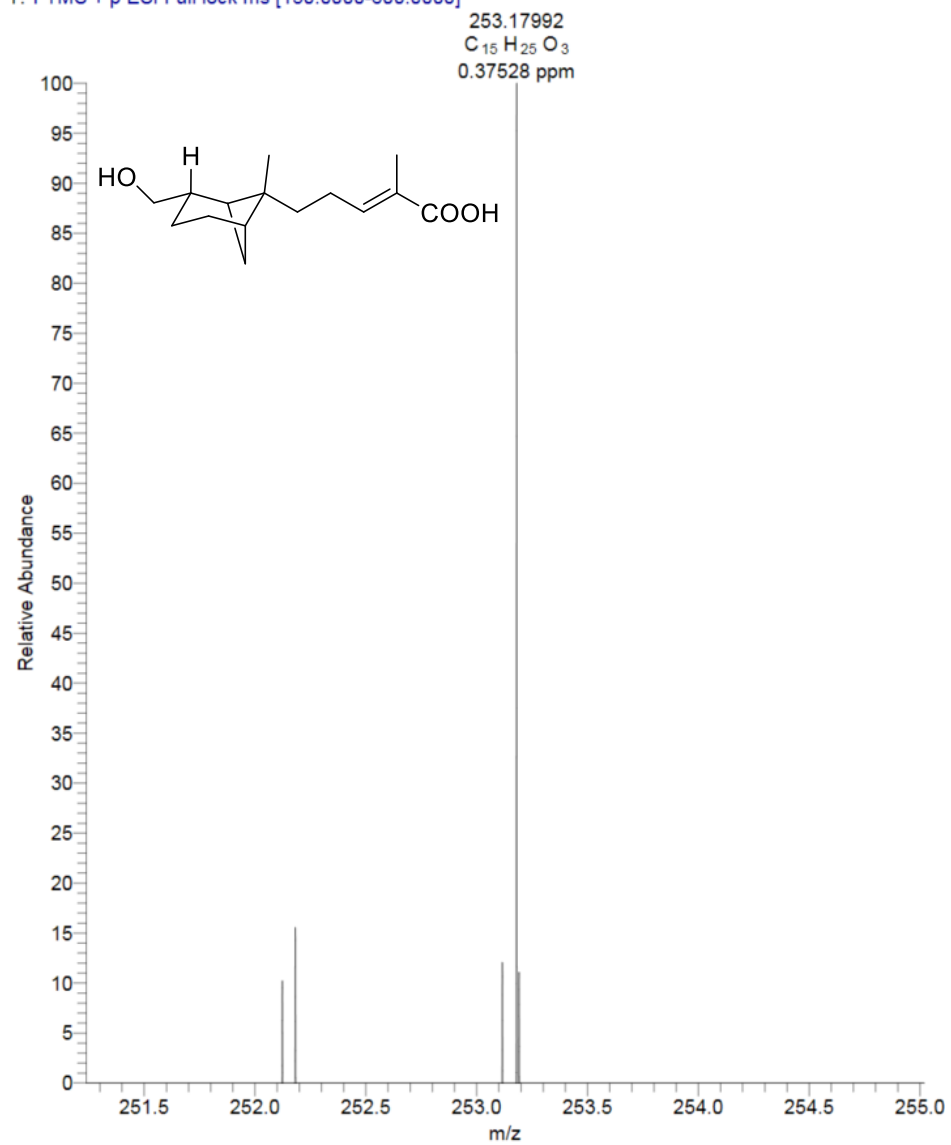

## Section S21. NMR and MS spectra for 14

Figure S115.  $^1\text{H}$  NMR of compound **14** in  $\text{CD}_3\text{OD}$

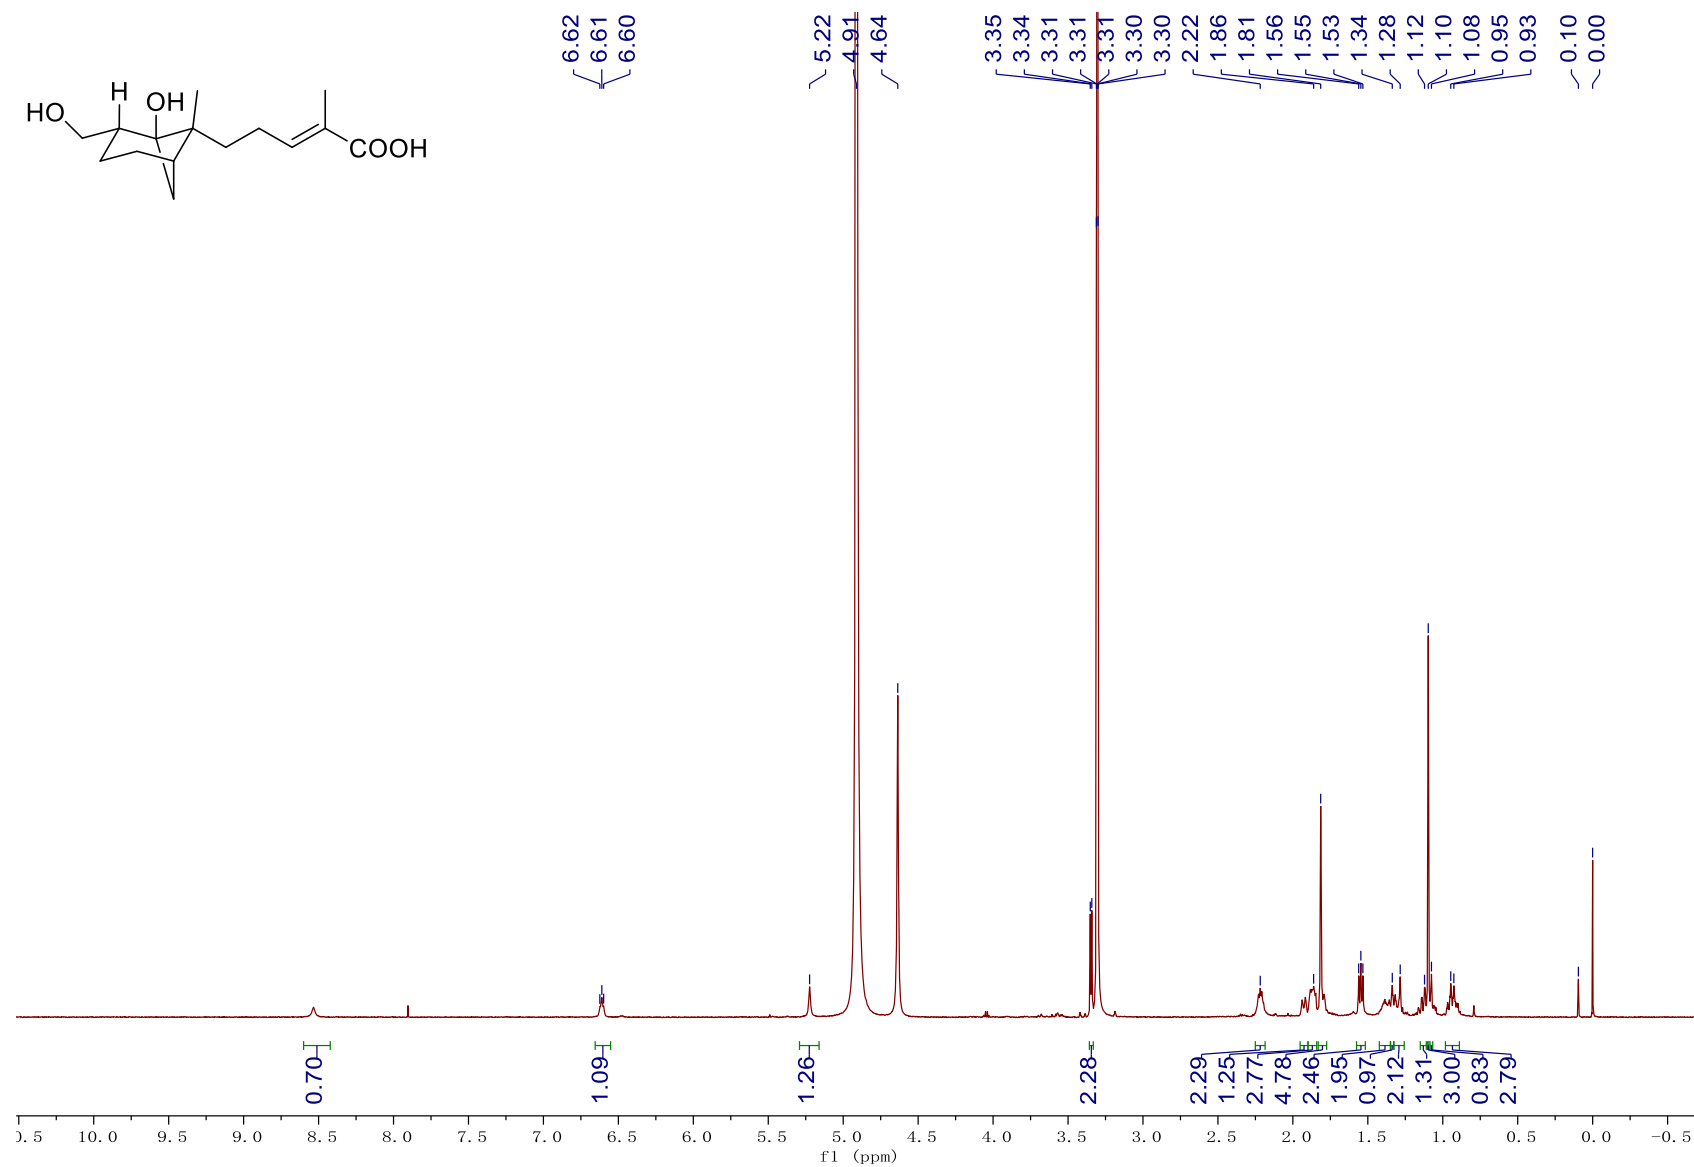

**Figure S116.**  $^{13}\text{C}$  NMR and DEPT of compound **14** in  $\text{CD}_3\text{OD}$

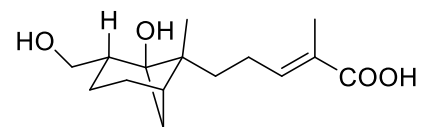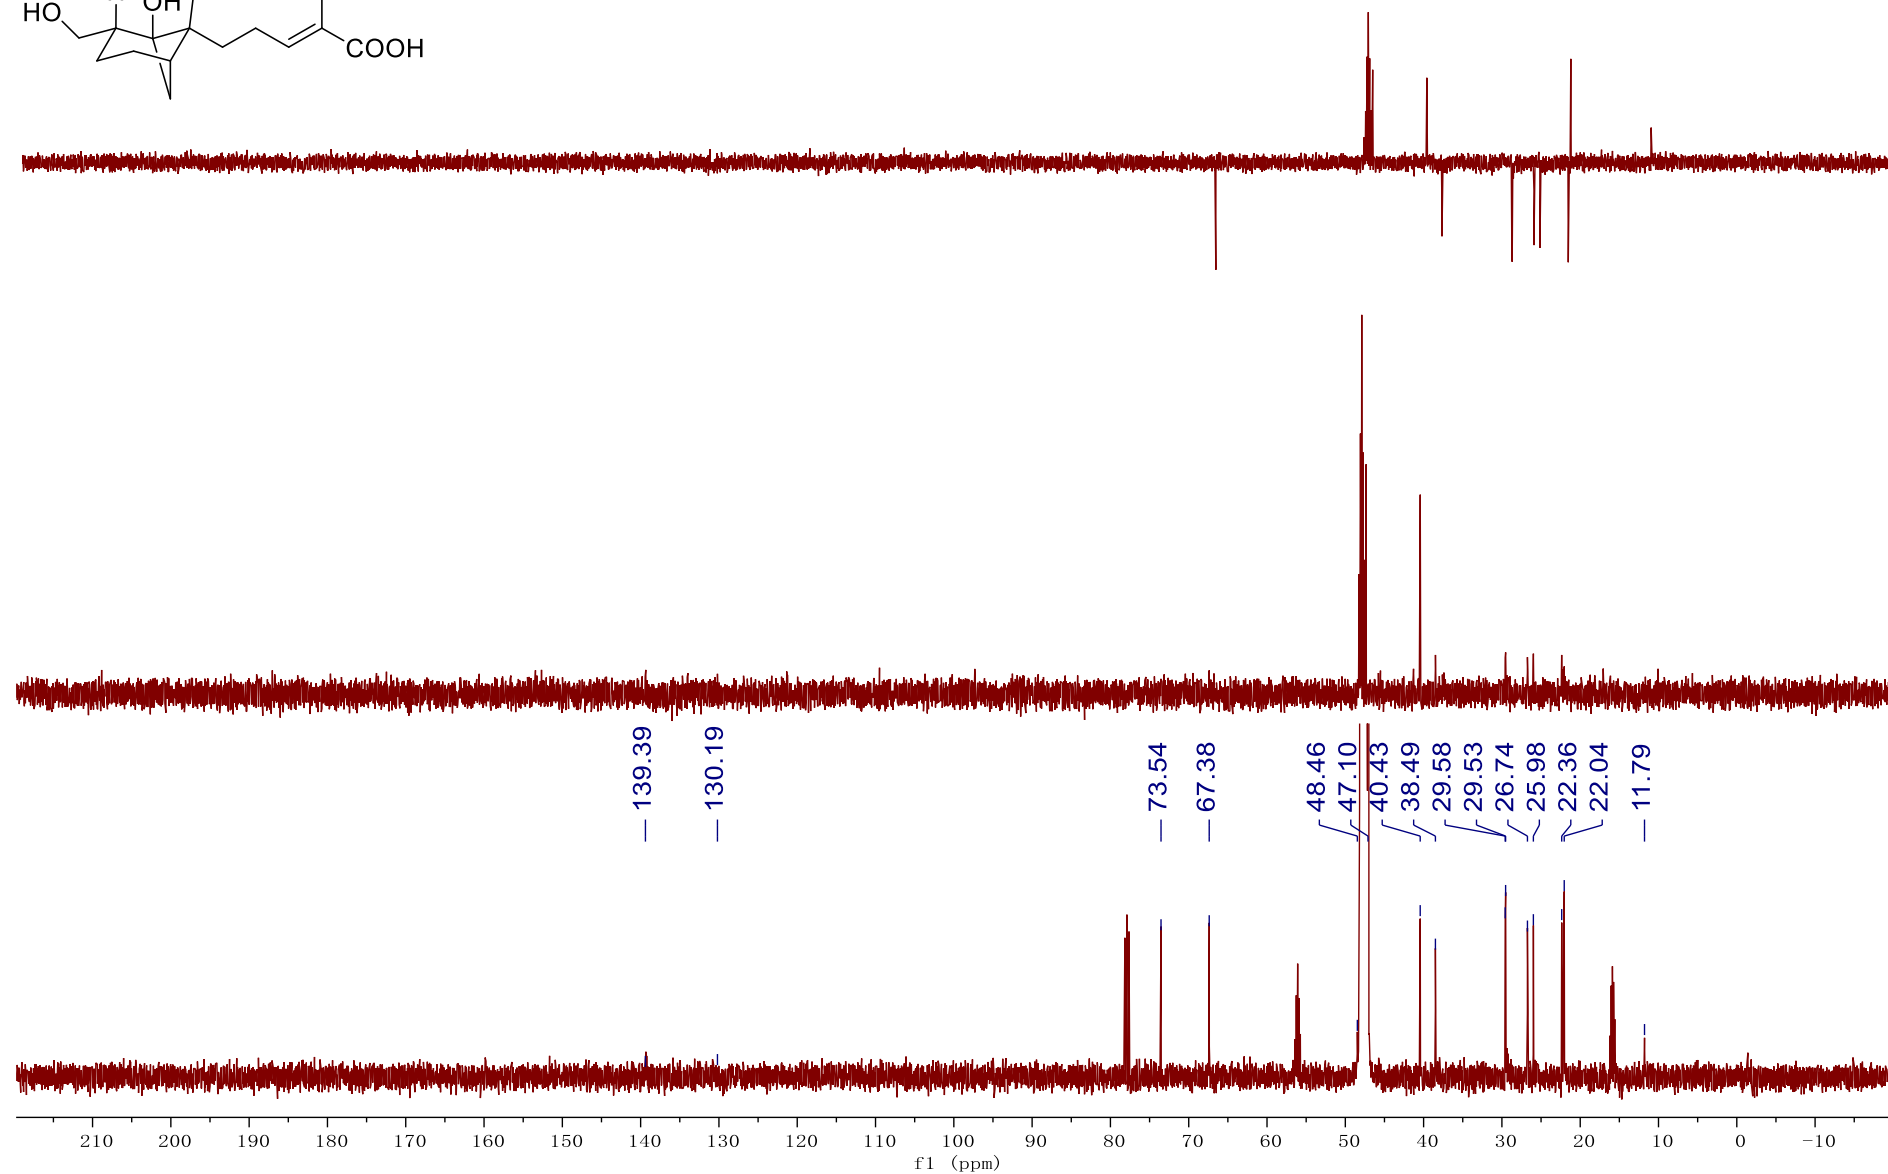



Chemical structure of the compound is shown in the top left corner: CC(=C)CC12C(C1)C(O)C(O)C2

The 2D NMR spectrum displays the following data:

- 1D  $^1\text{H}$  NMR (top):** Shows peaks in the aromatic region (6.5-7.0 ppm), a carboxylic acid proton (~11.5 ppm), and aliphatic protons (1.0-2.5 ppm).
- 1D  $^{13}\text{C}$  NMR (left):** Shows peaks for the carboxylic acid carbon (~165 ppm), aromatic carbons (100-150 ppm), and aliphatic carbons (20-50 ppm).
- 2D Plot:** The x-axis is  $f_2$  (ppm) from 0.0 to 7.5, and the y-axis is  $f_1$  (ppm) from 0 to 100. The plot shows correlations between  $^1\text{H}$  and  $^{13}\text{C}$  signals, with significant cross-peaks indicating the assignment of the aliphatic protons to the corresponding carbons.

**Figure S118.** HMBC of compound **14** in CD<sub>3</sub>OD

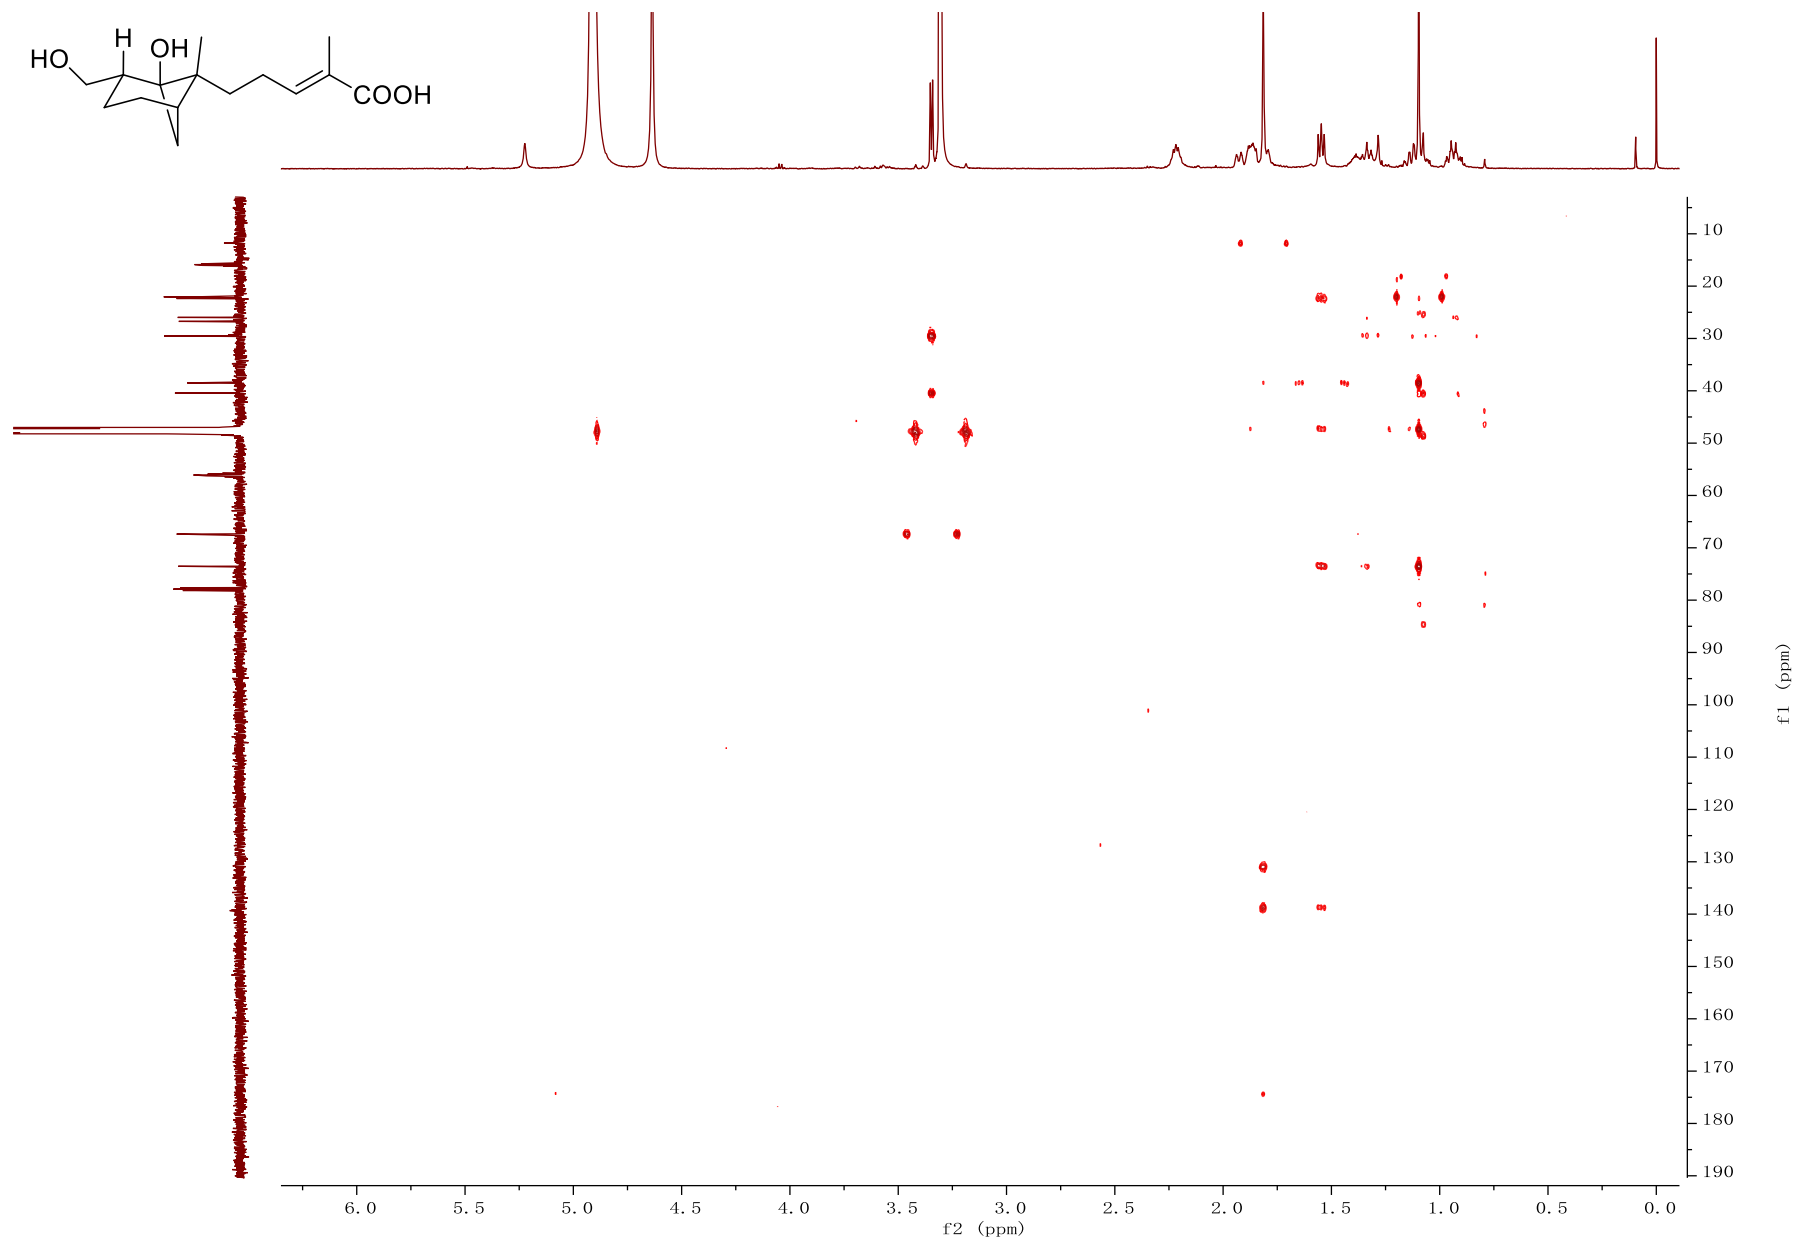

**Figure S119.**  $^1\text{H}$ - $^1\text{H}$  COSY of compound **14** in  $\text{CD}_3\text{OD}$

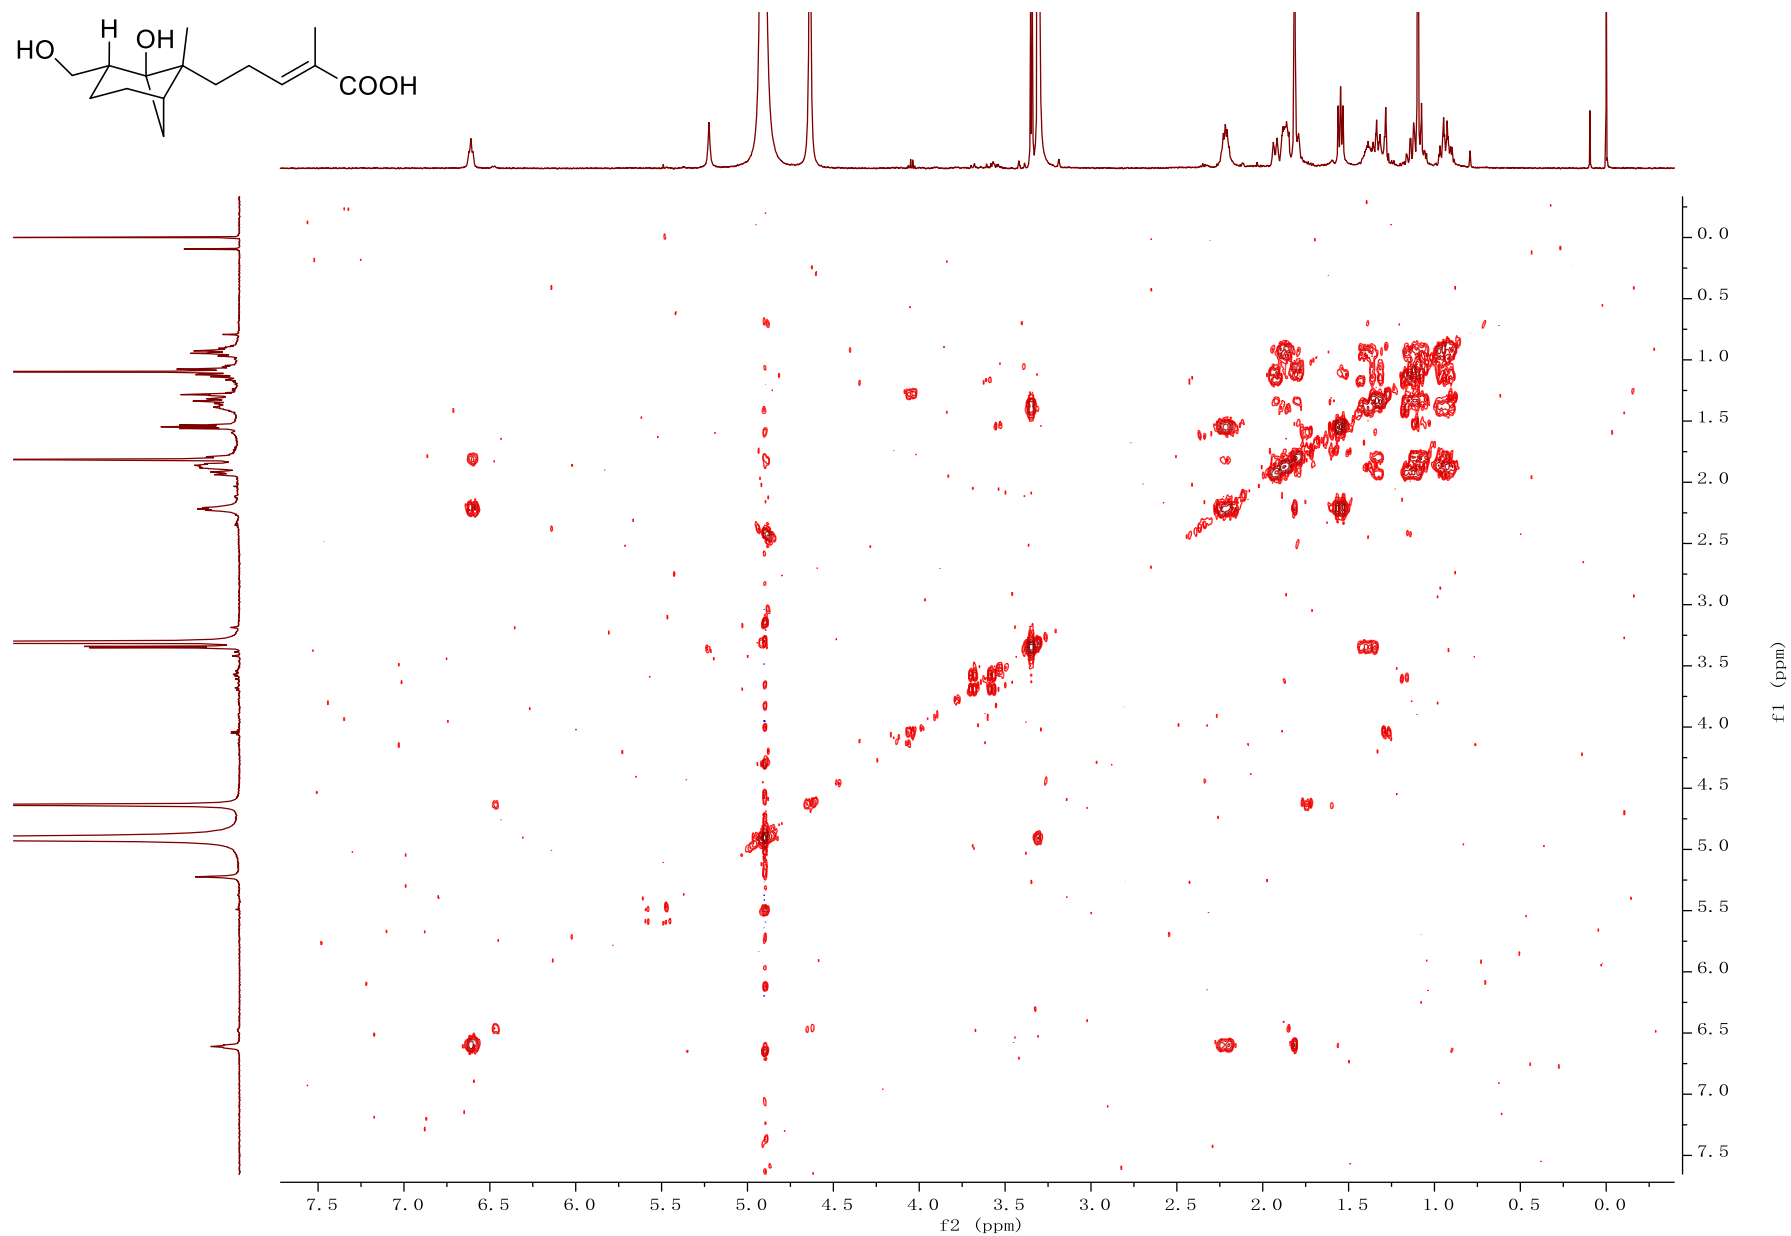

**Figure S120.** ROESY of compound **14** in CD<sub>3</sub>OD

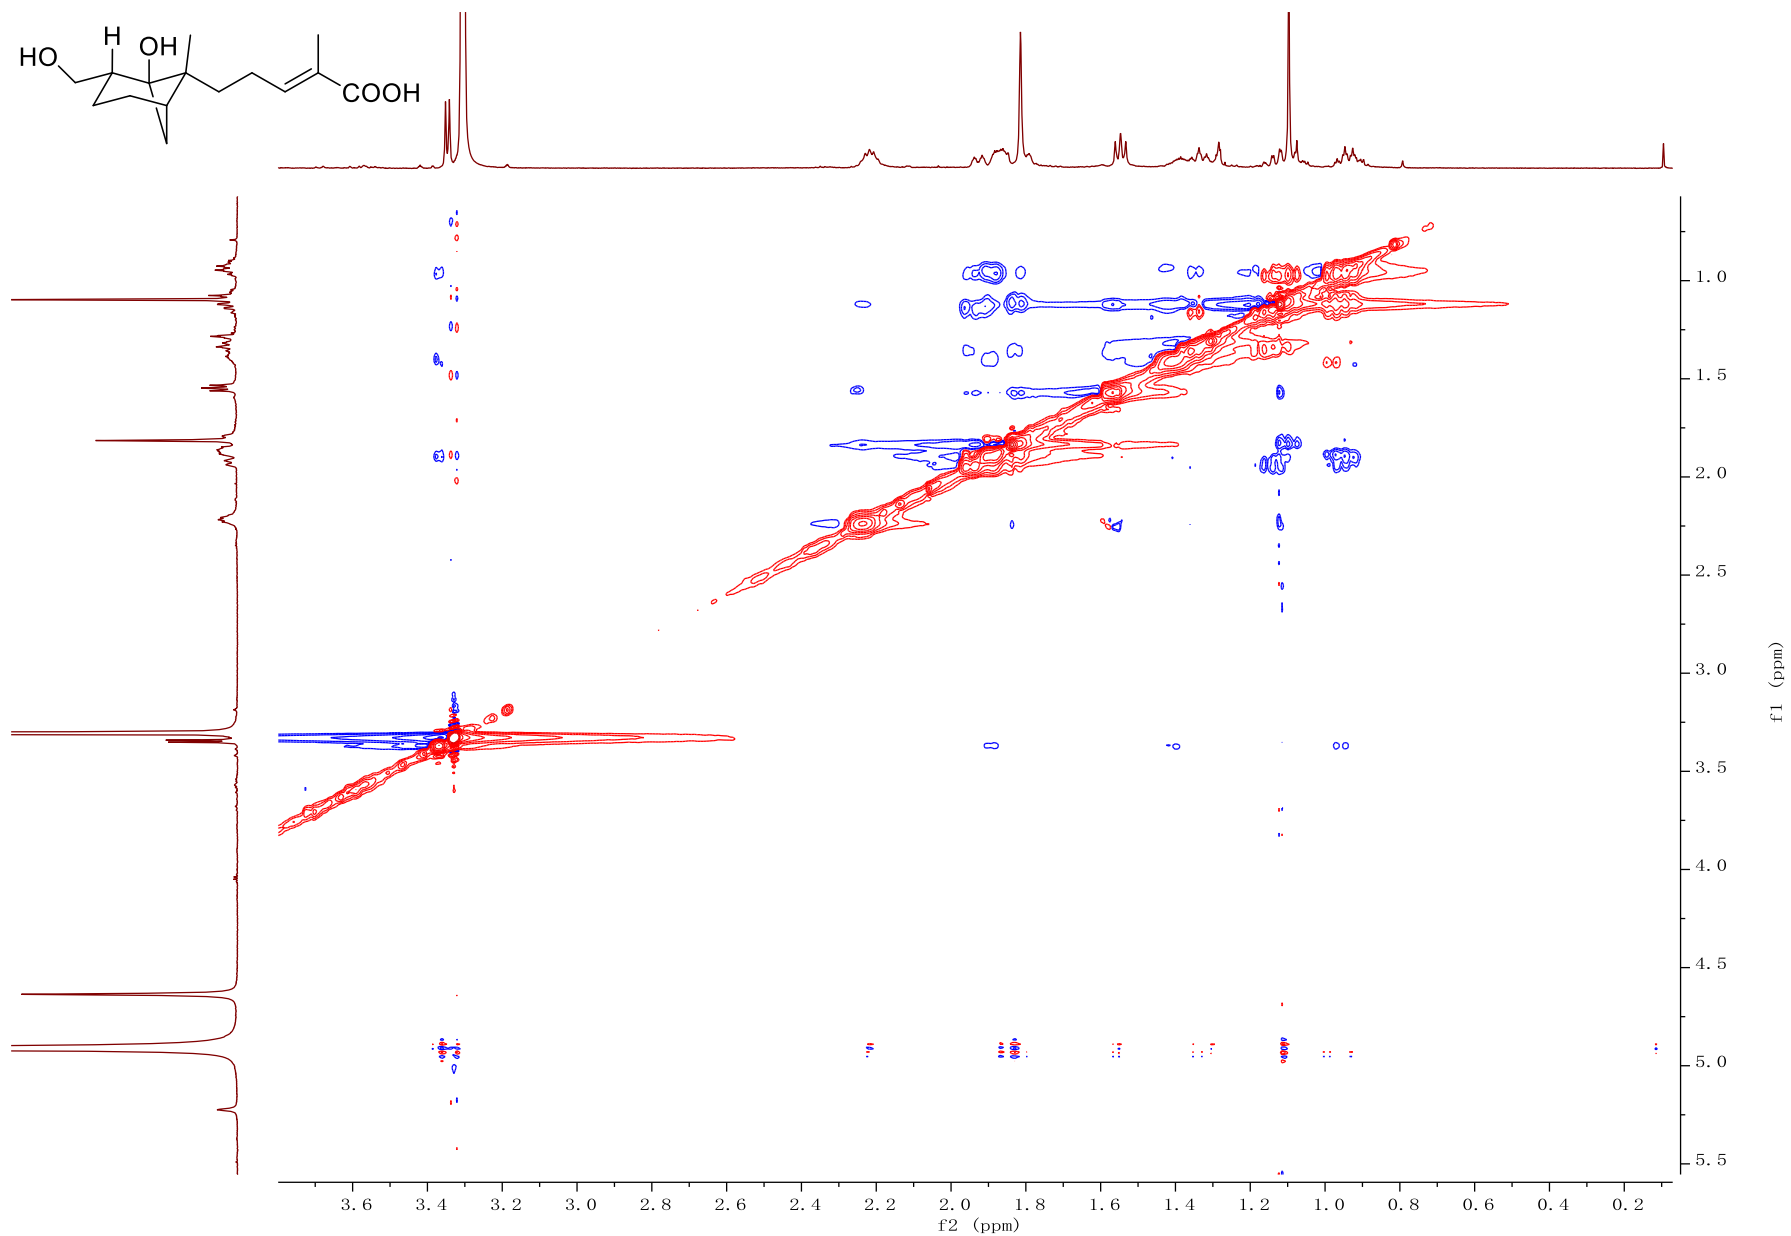

T: FTMS + p ESI Full lock ms [100.0000-600.0000]

291.15658  
C<sub>15</sub> H<sub>24</sub> O<sub>4</sub> Na  
-0.34798 ppm

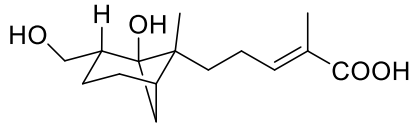

## Section S22. NMR and MS spectra for 15

Figure S122.  $^1\text{H}$  NMR of compound **15** in  $\text{CD}_3\text{OD}$

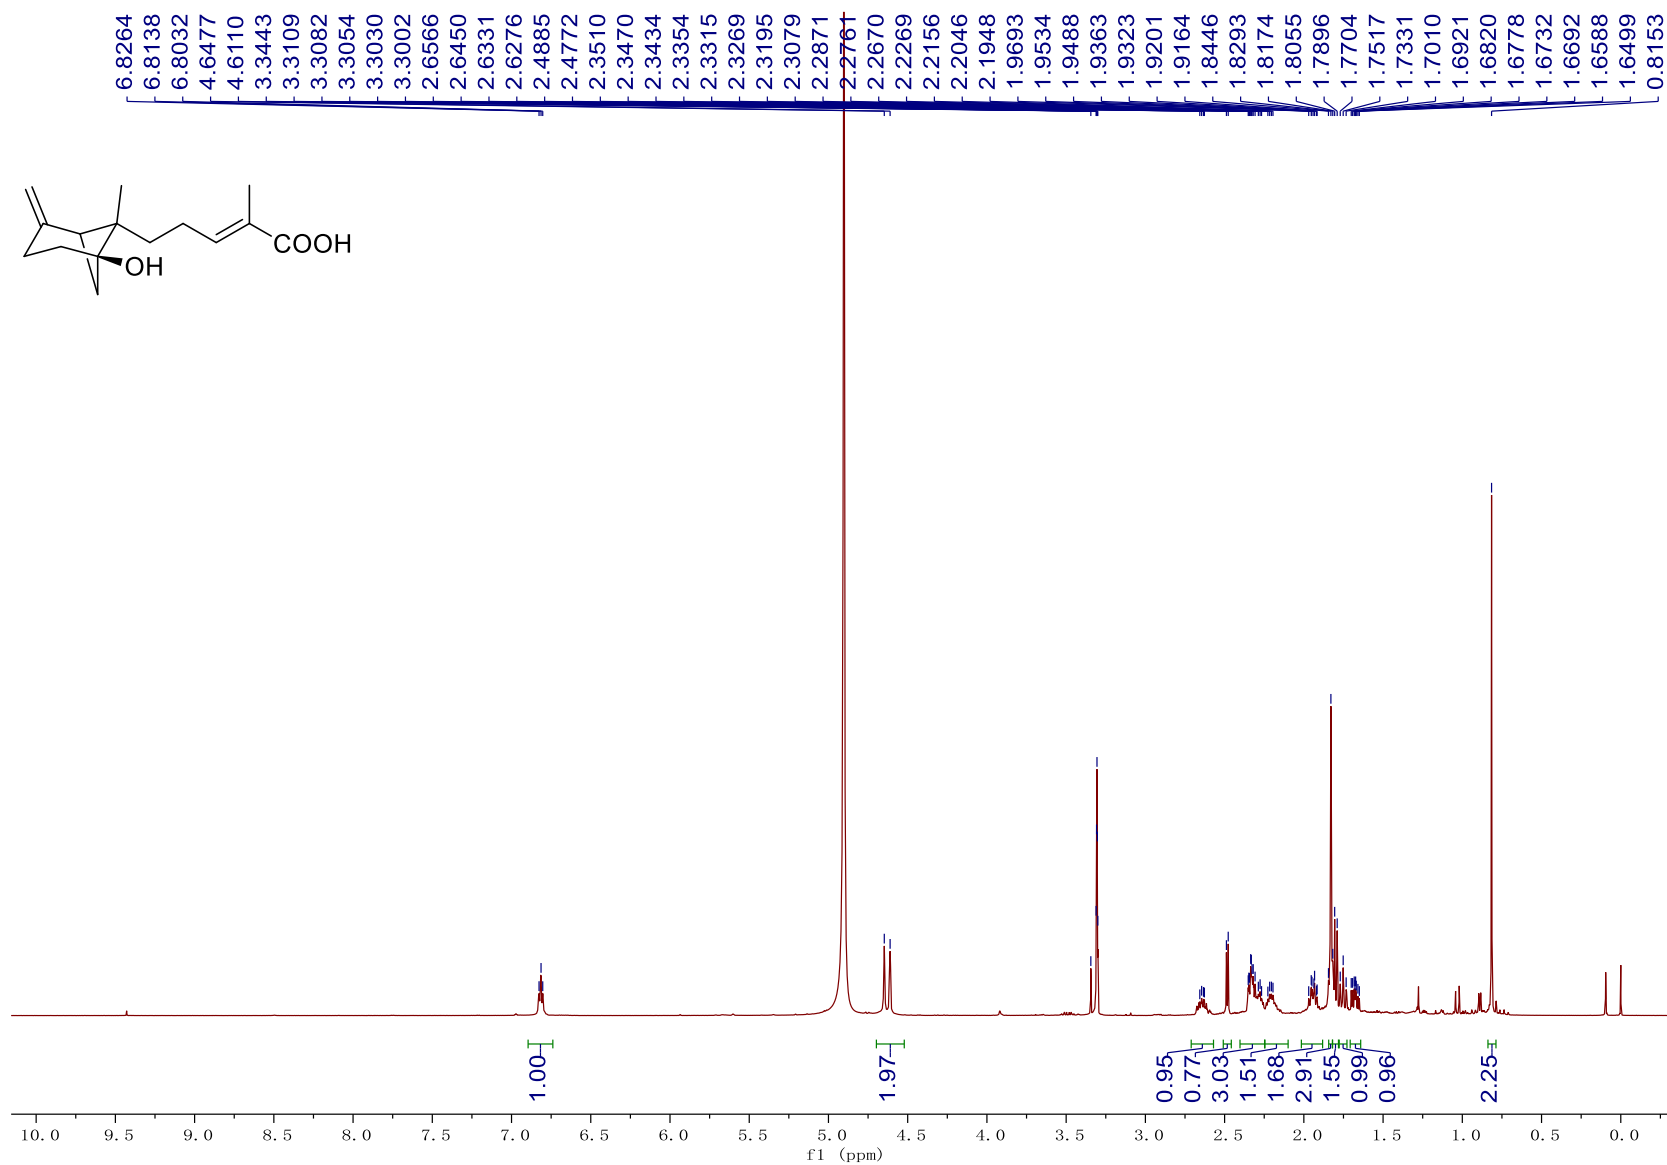

**Figure S123.**  $^{13}\text{C}$  NMR and DEPT of compound **15** in  $\text{CD}_3\text{OD}$

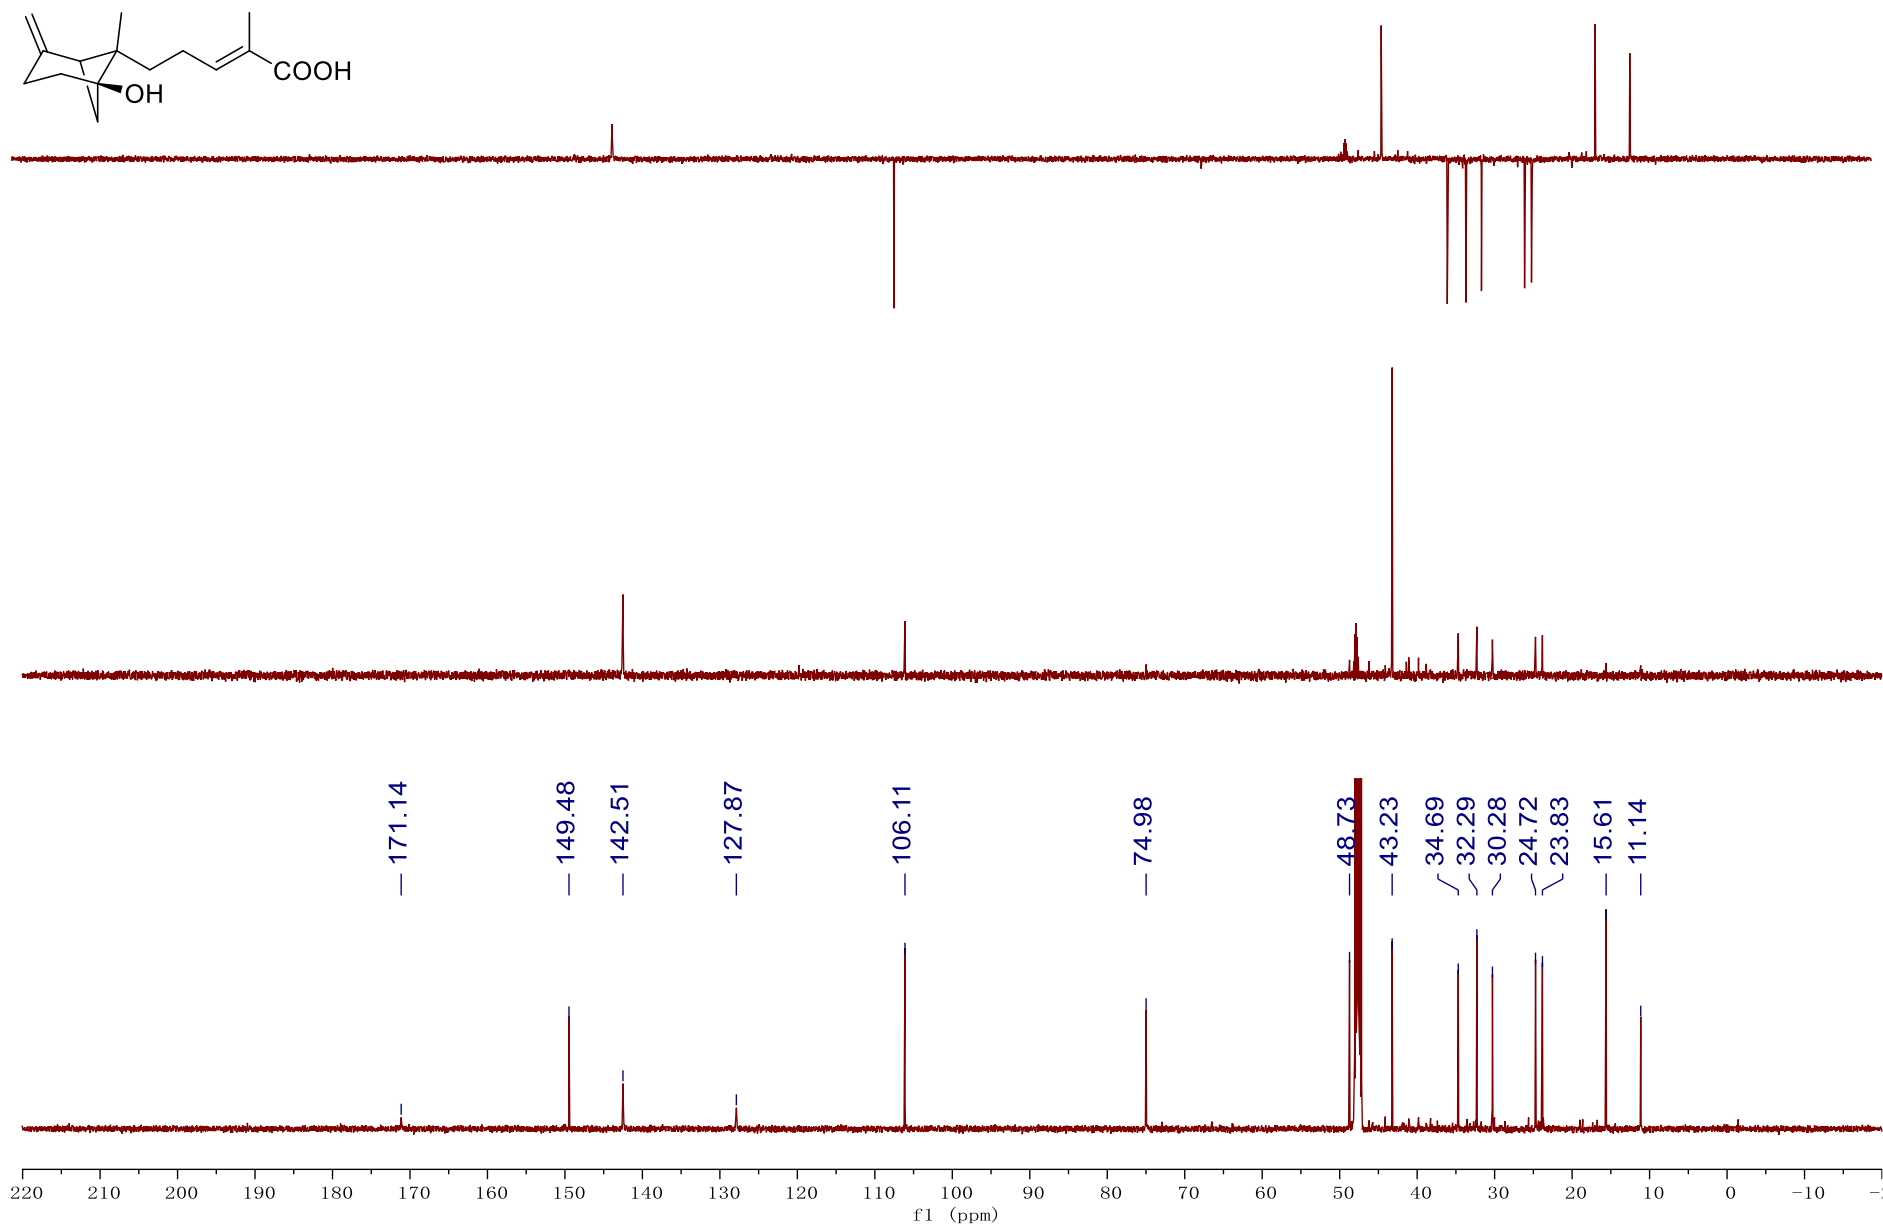

**Figure S124.** HSQC of compound **15** in CD<sub>3</sub>OD

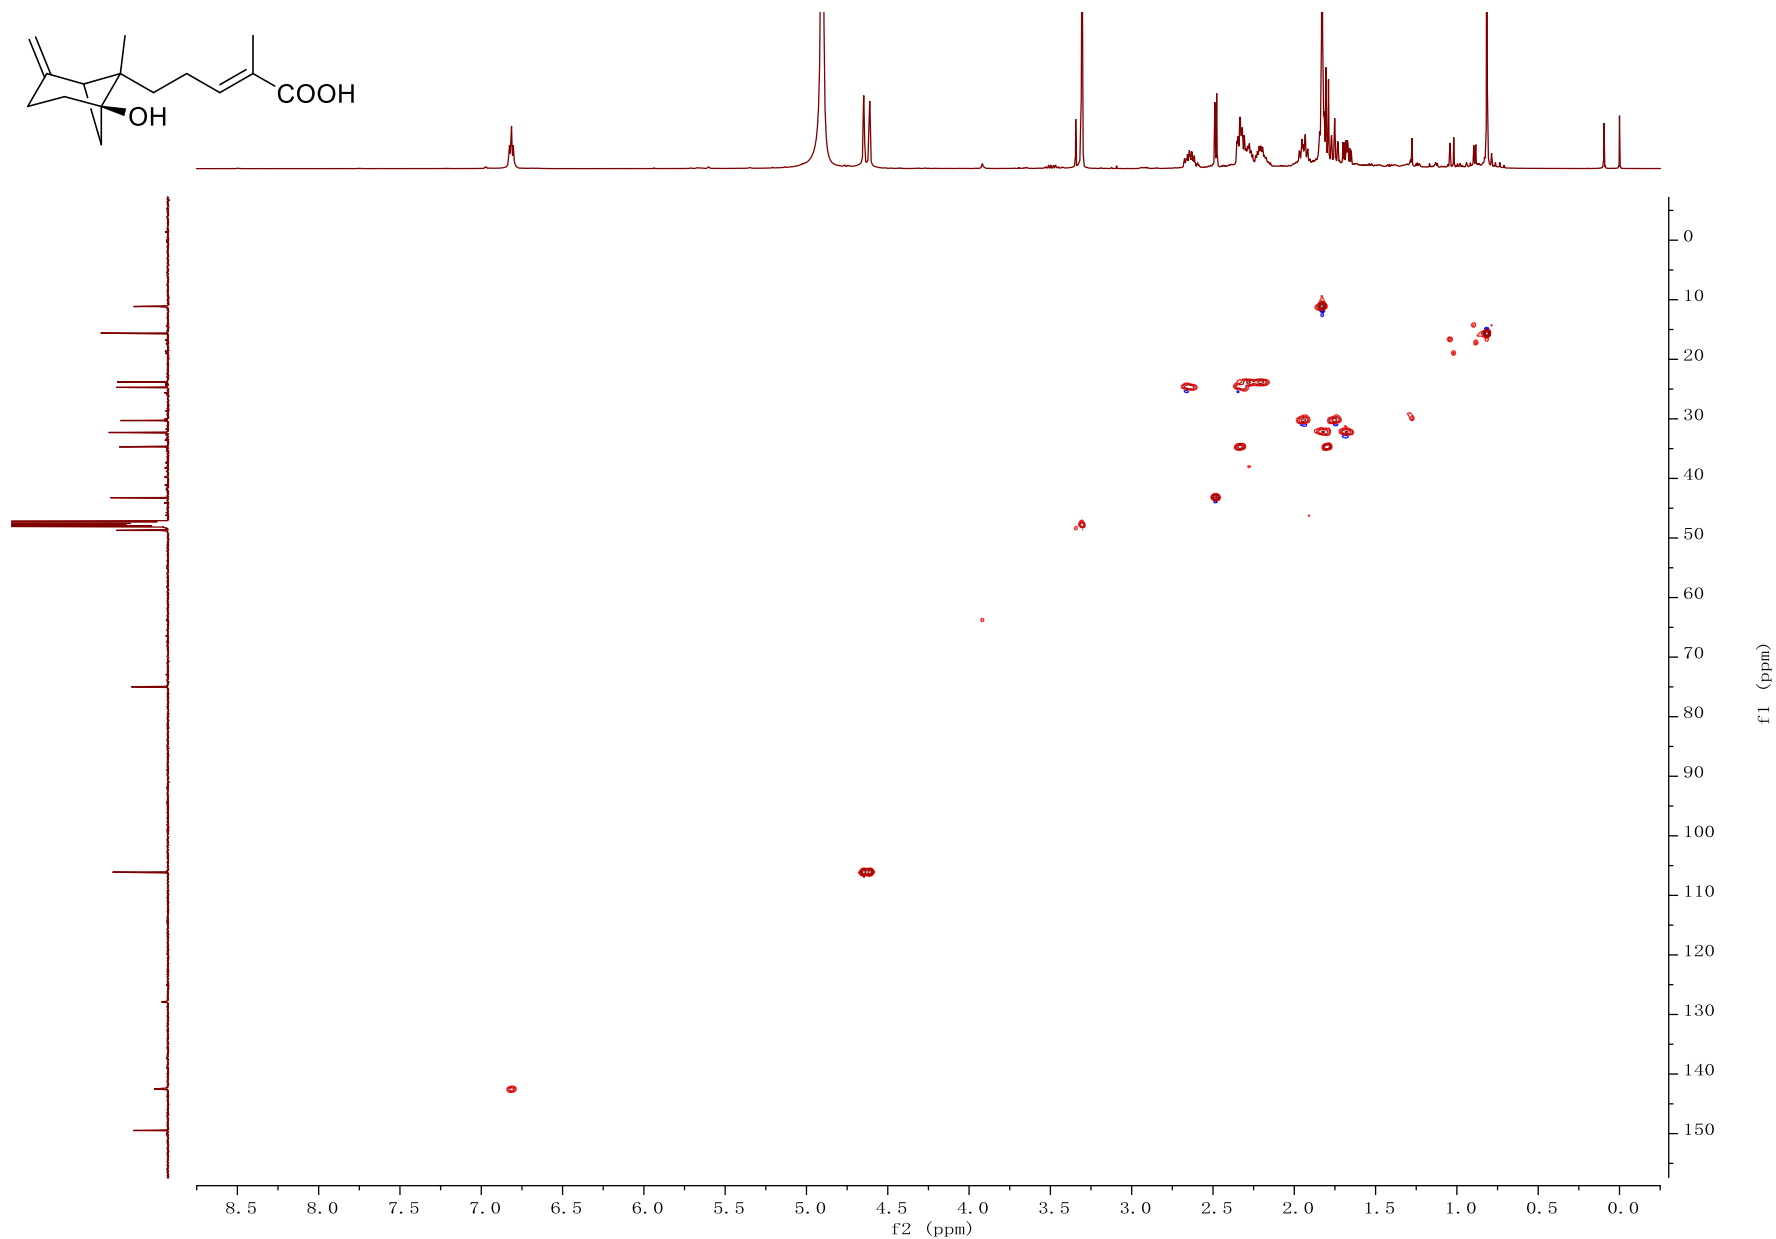



**Figure S125.** HMBC of compound **15** in CD<sub>3</sub>OD

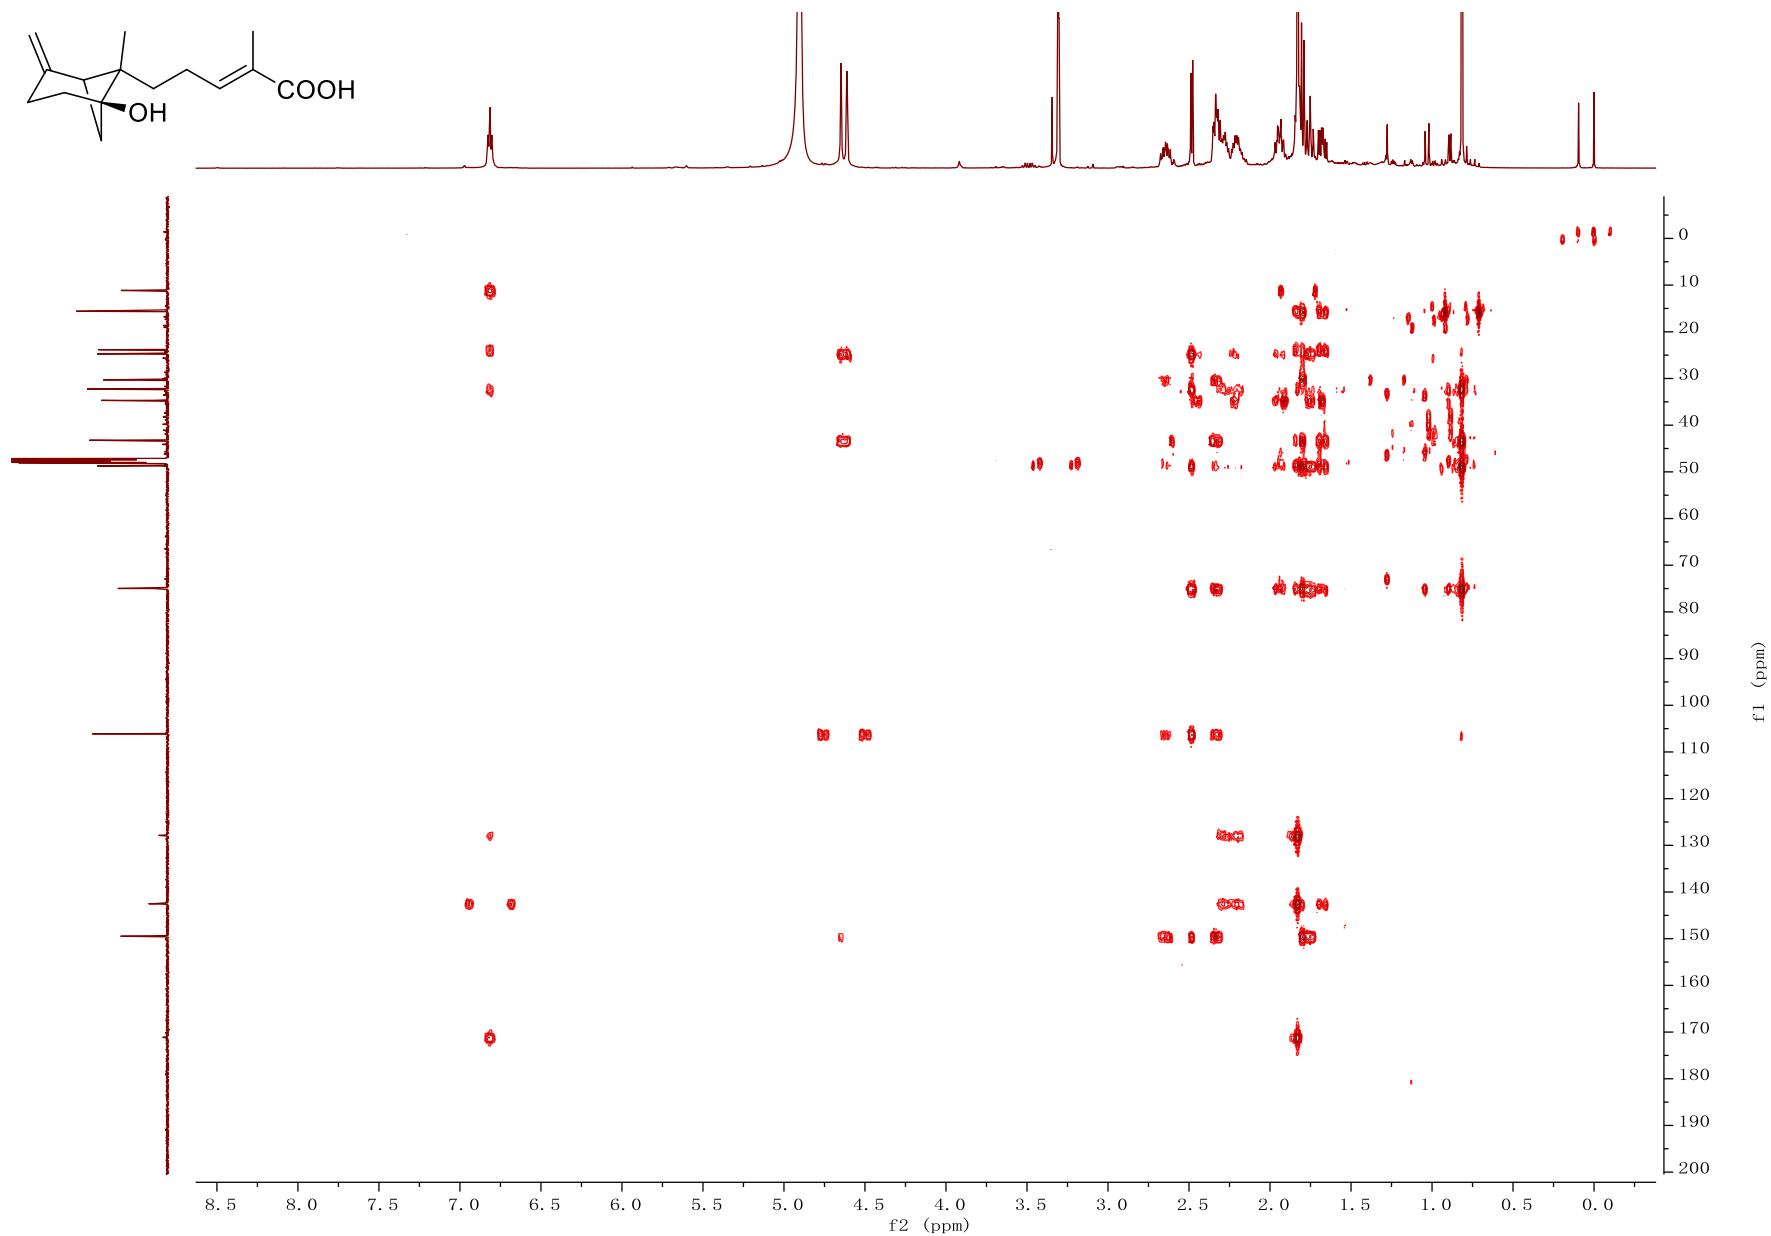

**Figure S126.**  $^1\text{H}$ - $^1\text{H}$  COSY of compound **15** in  $\text{CD}_3\text{OD}$

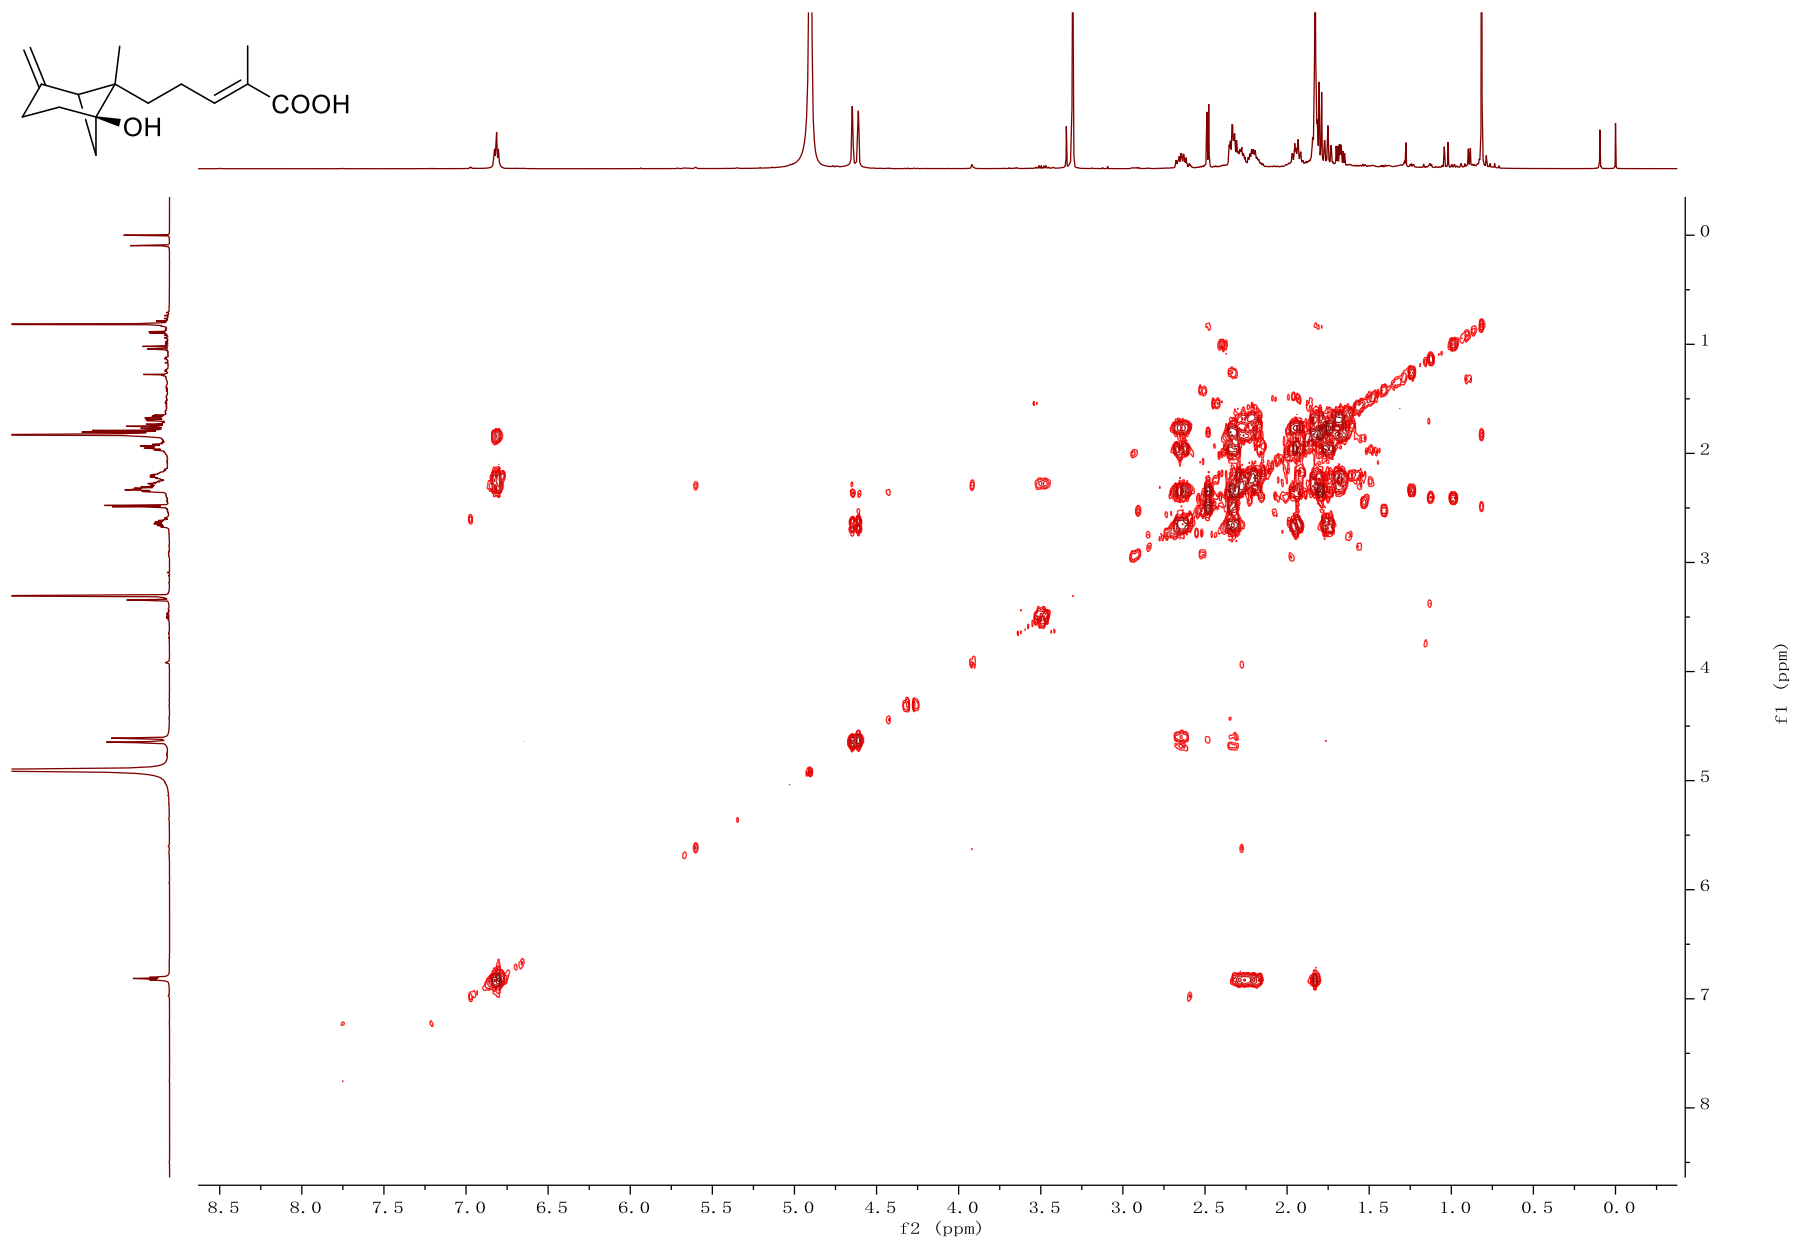

**Figure S127.** ROESY of compound **15** in CD<sub>3</sub>OD

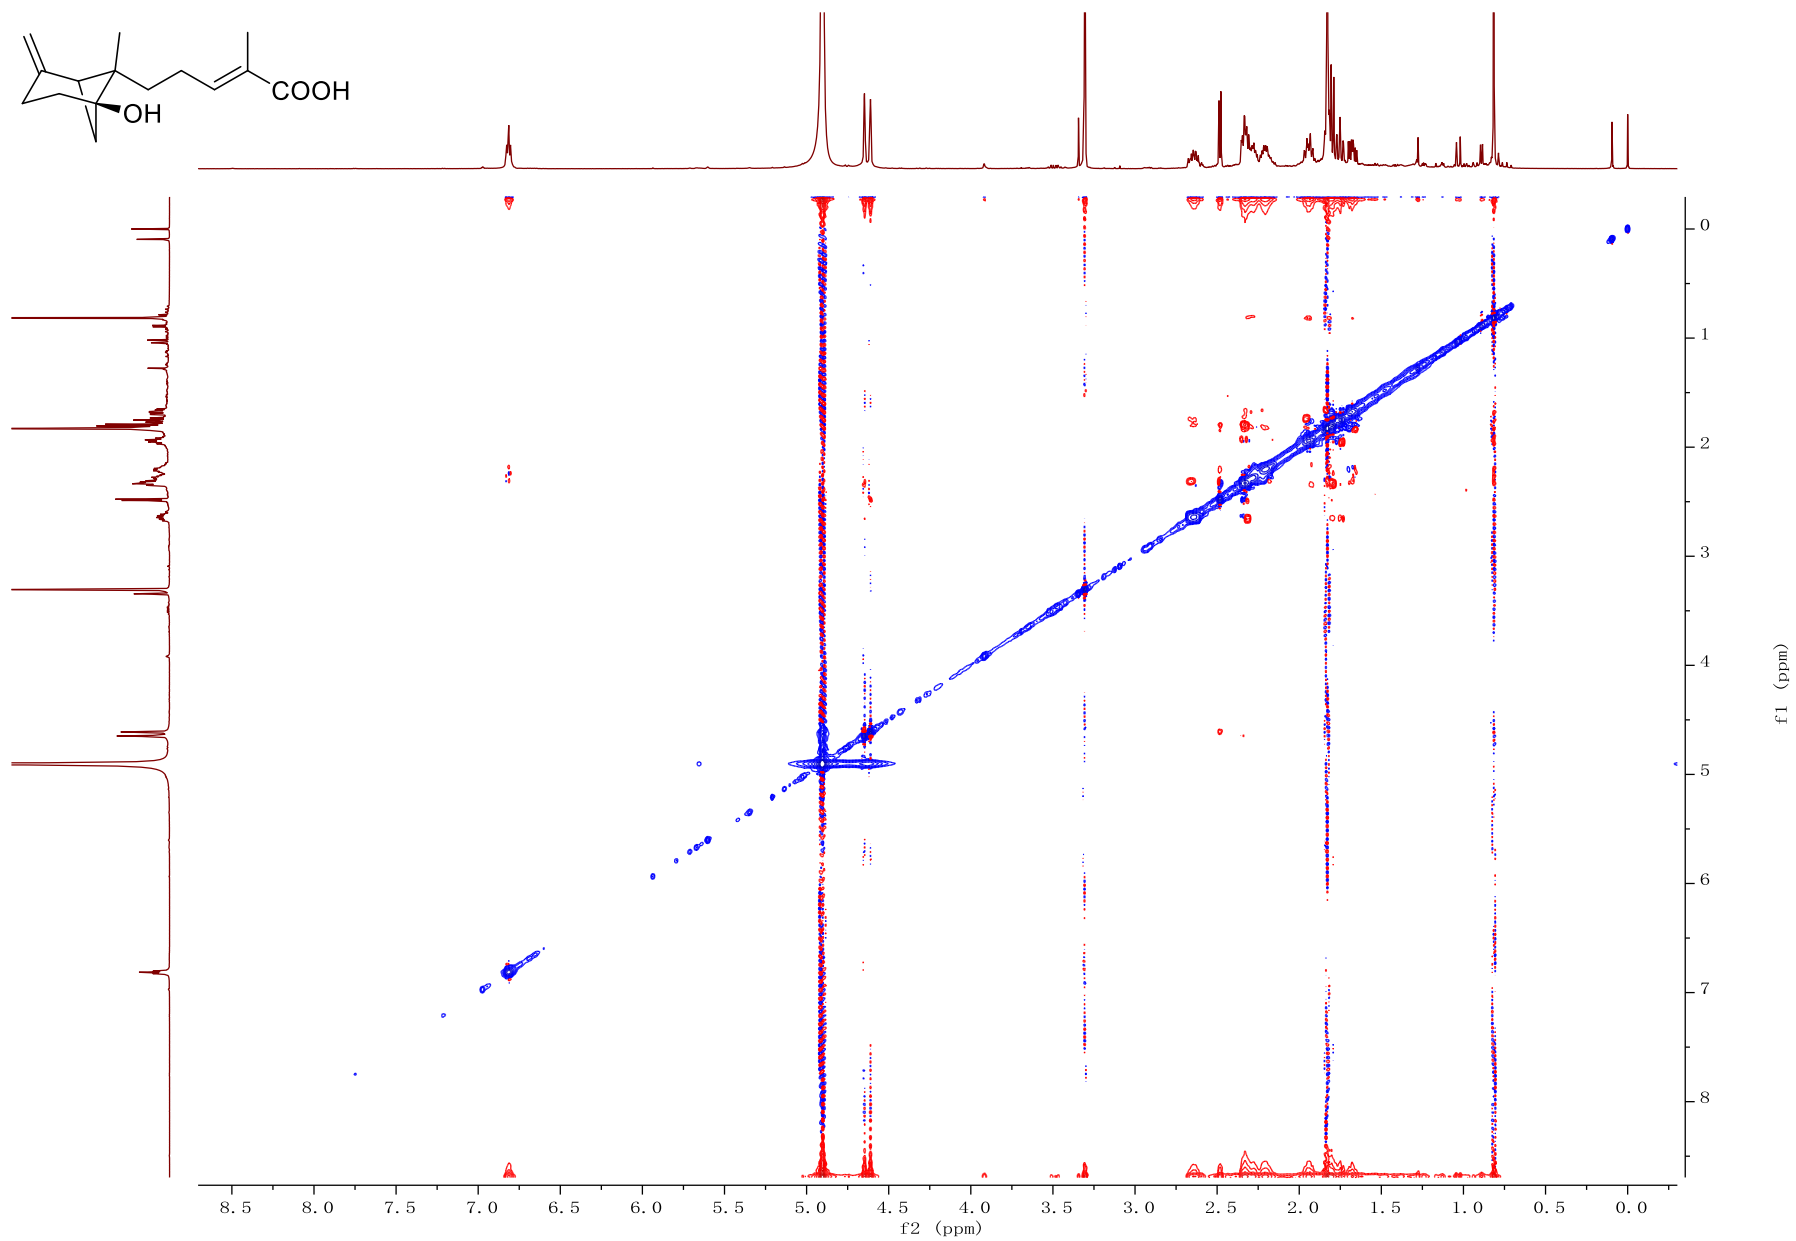

**Figure S128.** HR-ESIMS of compound **15**

T: FTMS<sup>+</sup> p ESI Full lock ms [150.0000-1100.0000]

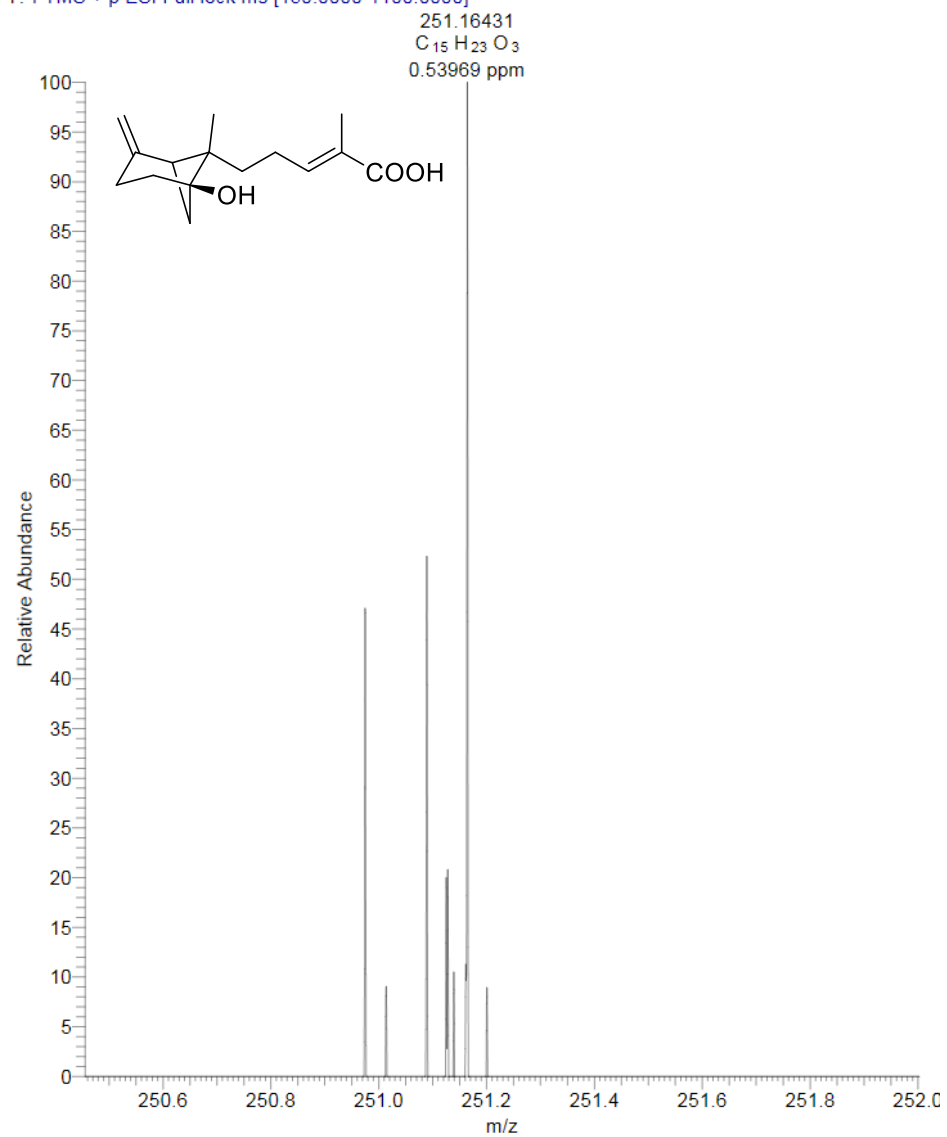

## Section S23. NMR and MS spectra for 16

Figure S129.  $^1\text{H}$  NMR of compound **16** in  $\text{CD}_3\text{OD}$

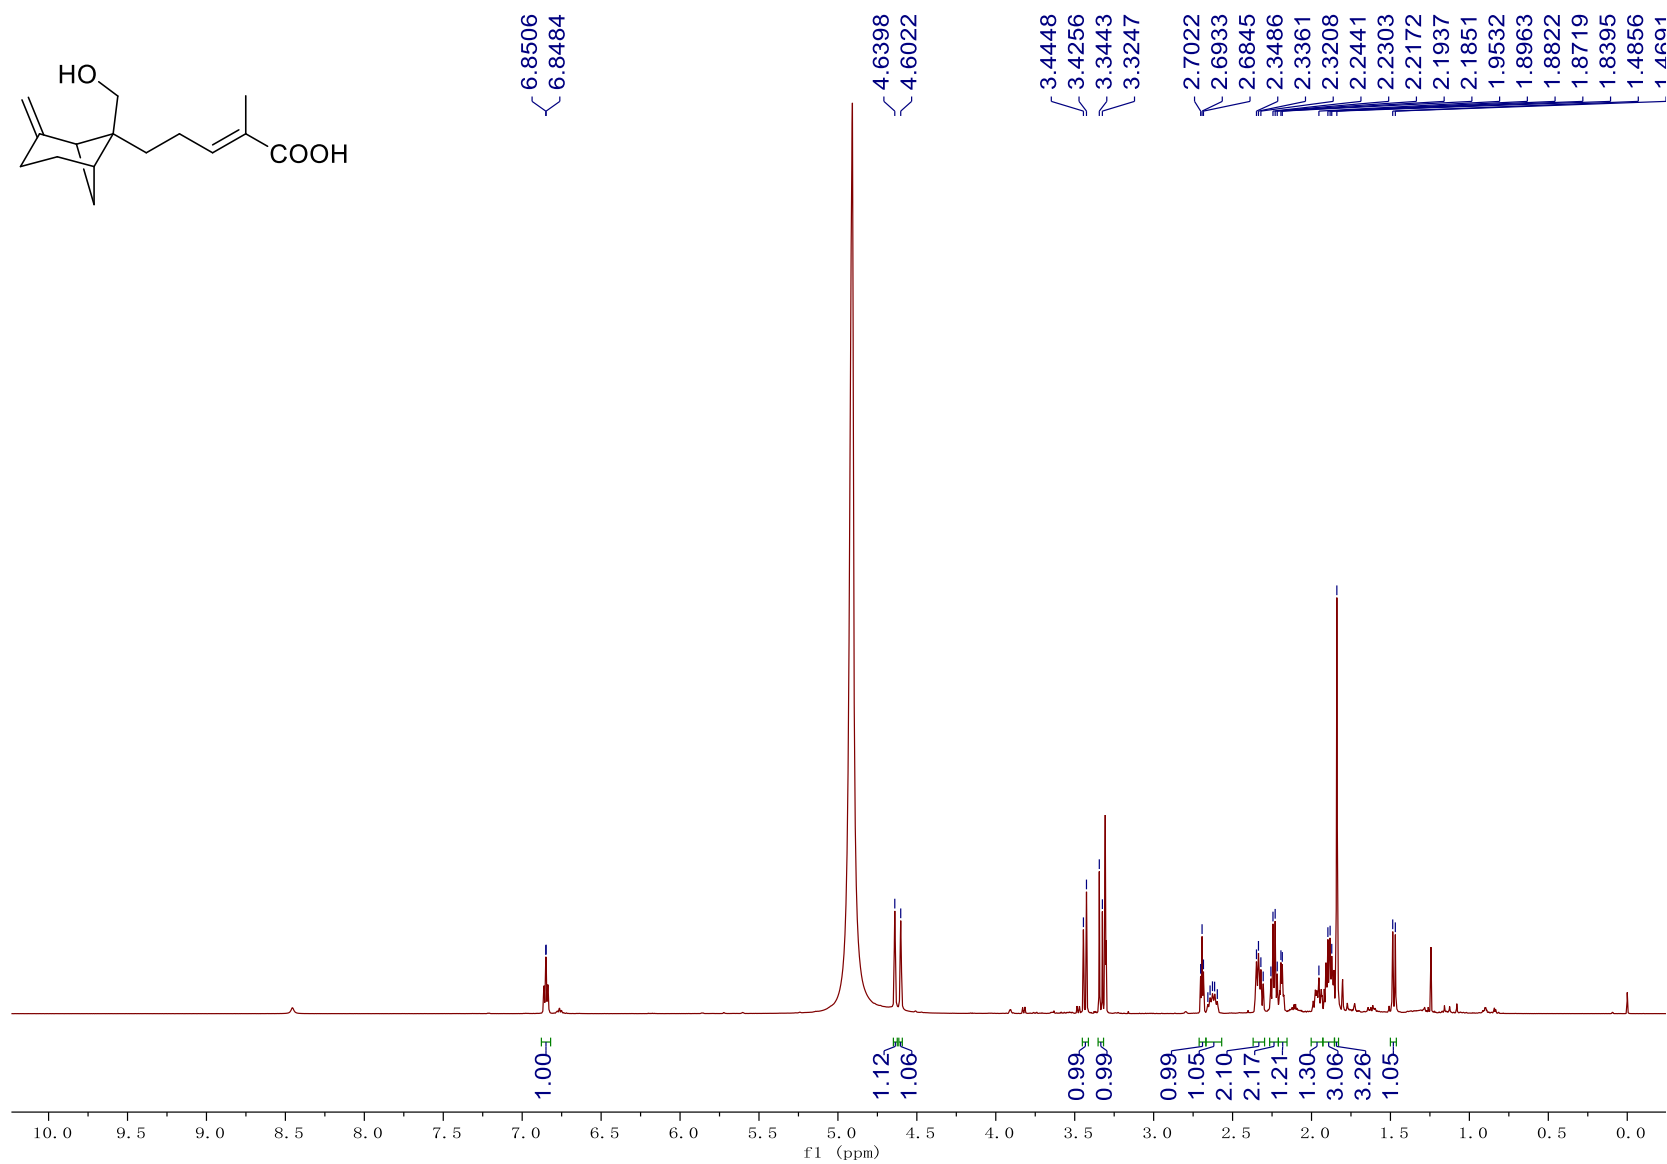

**Figure S130.**  $^{13}\text{C}$  NMR and DEPT of compound **16** in  $\text{CD}_3\text{OD}$

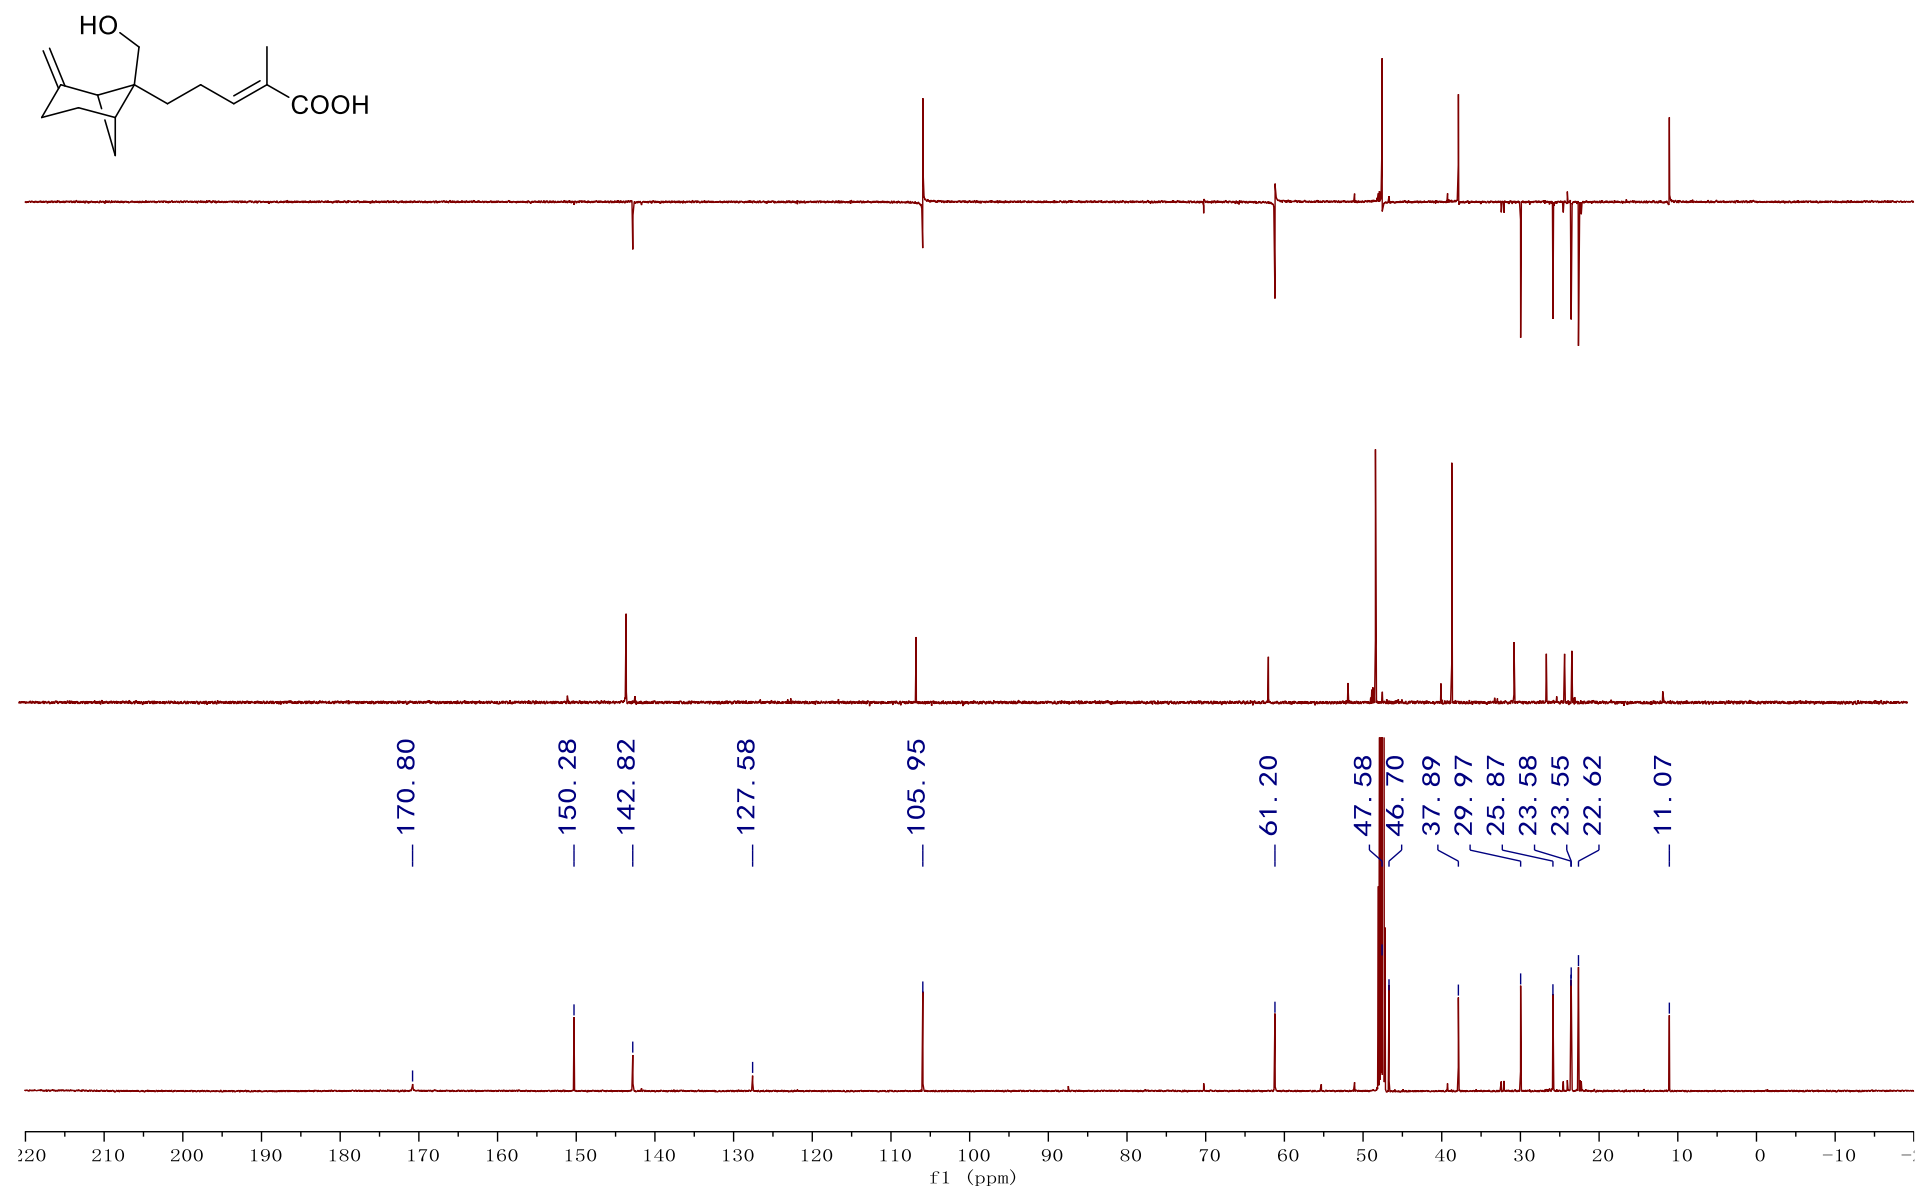

**Figure S131.** HSQC of compound **16** in CD<sub>3</sub>OD

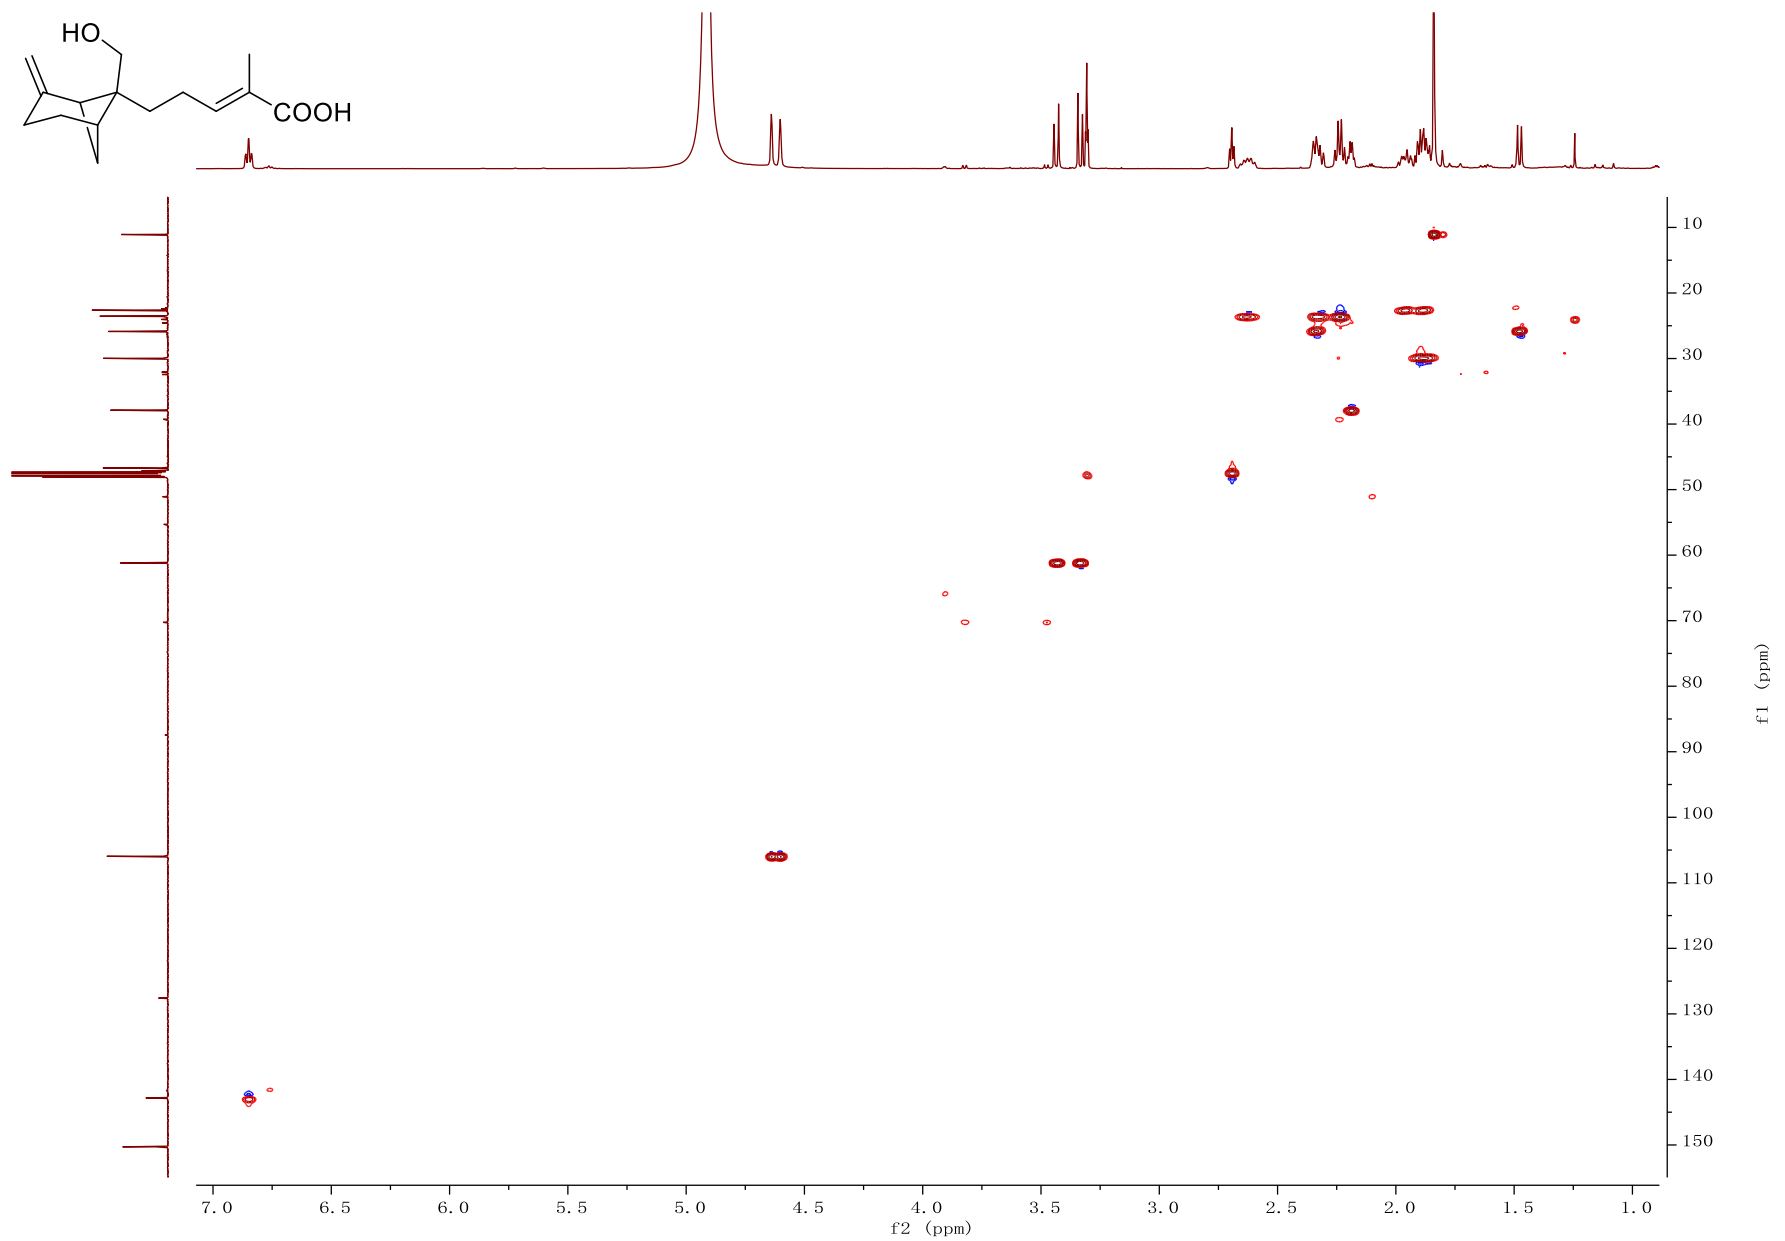

**Figure S132.** HMBC of compound **16** in CD<sub>3</sub>OD

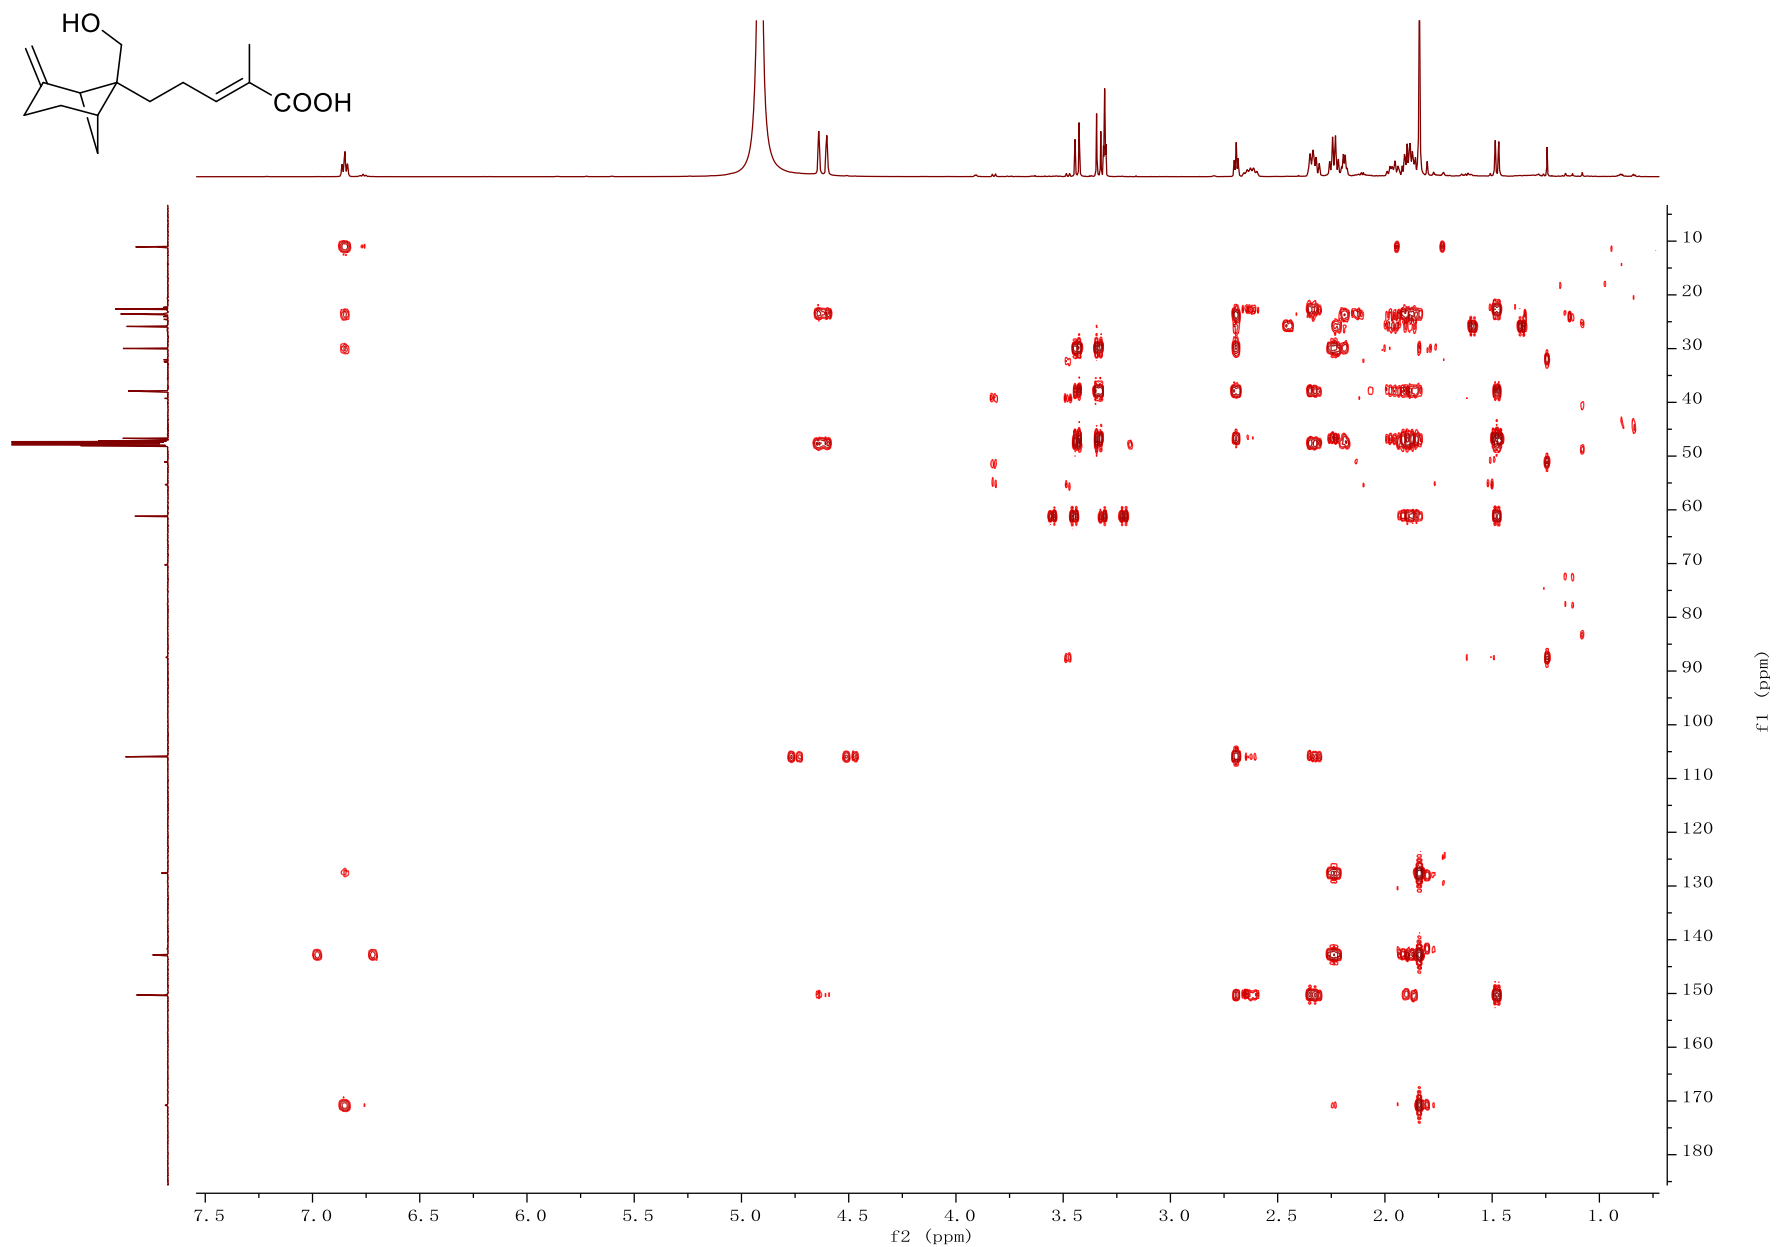



**Figure S133.**  $^1\text{H}$ - $^1\text{H}$  COSY of compound **16** in  $\text{CD}_3\text{OD}$

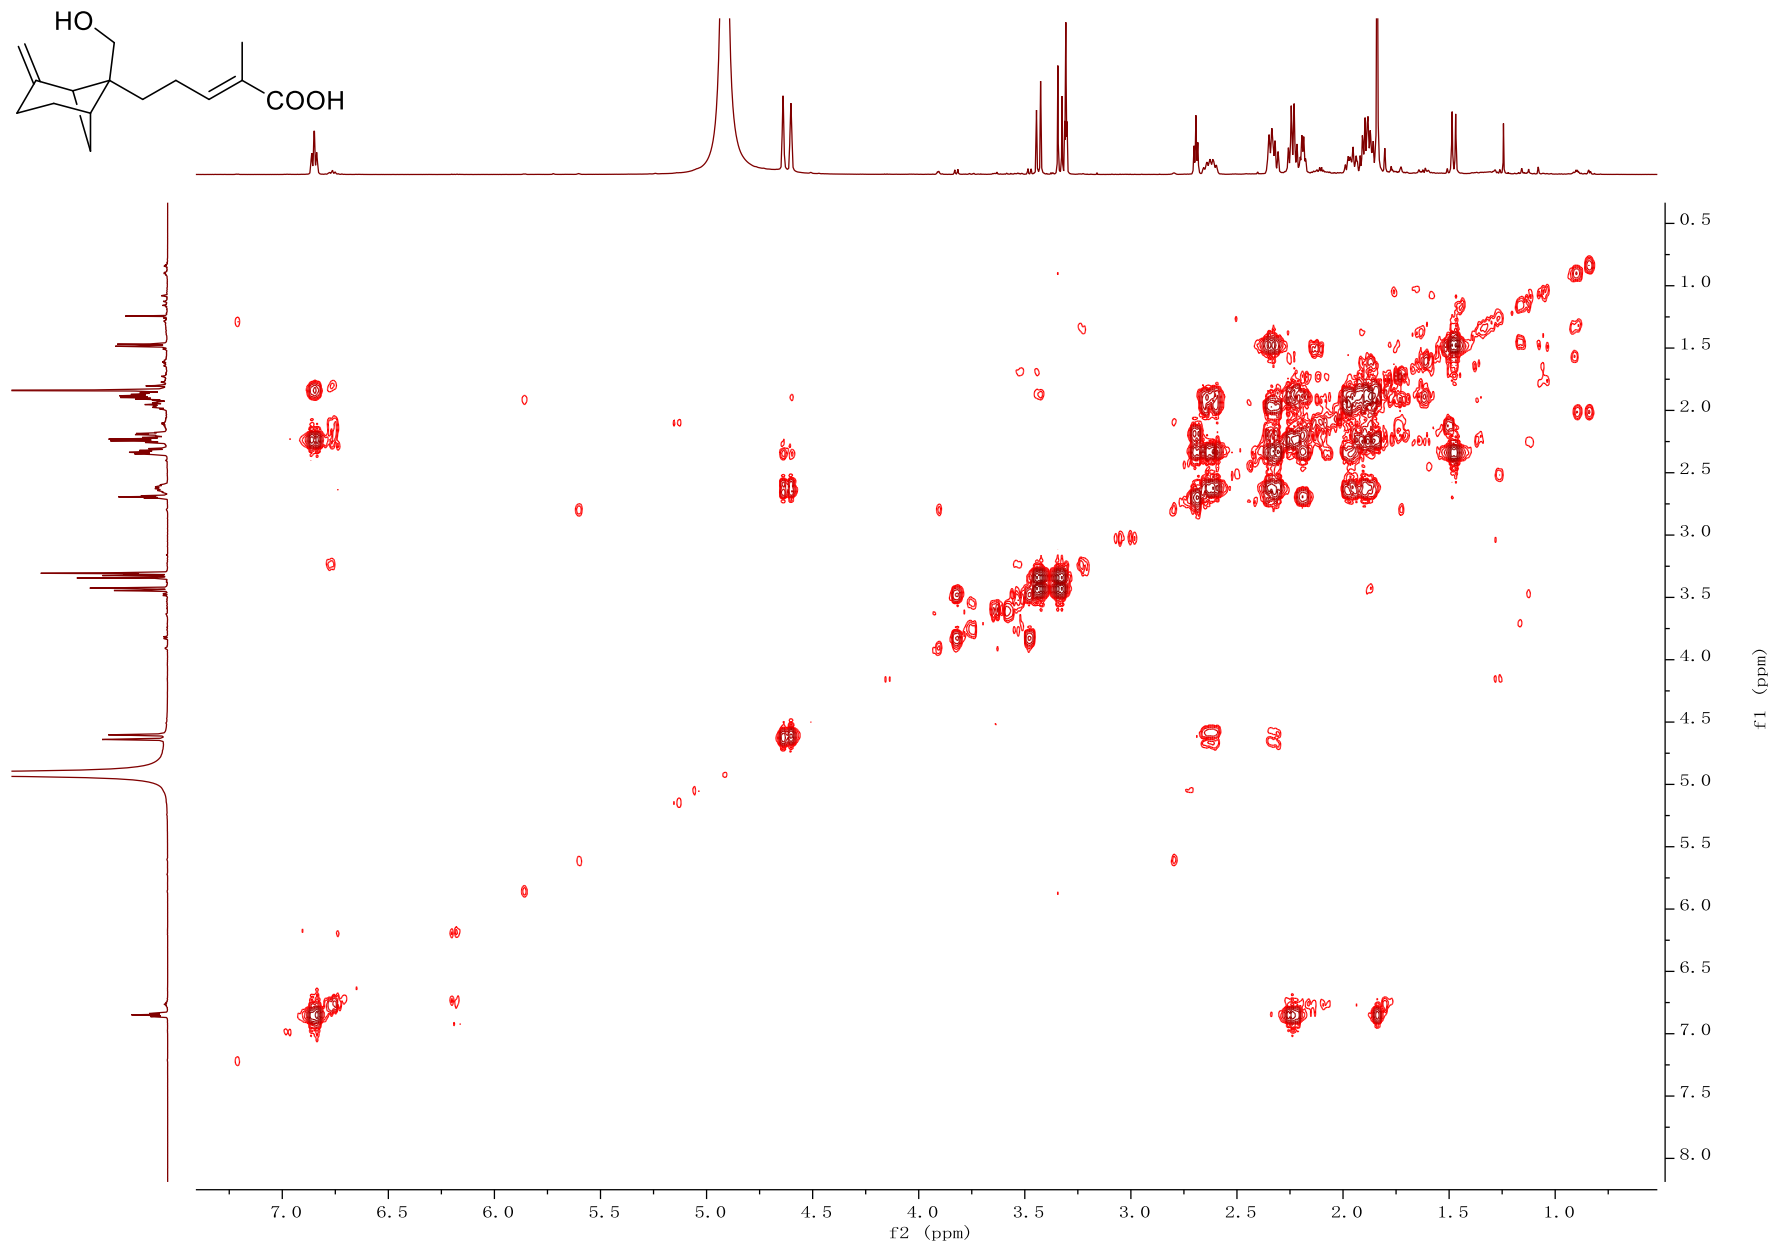

**Figure S134.** ROESY of compound **16** in CD<sub>3</sub>OD

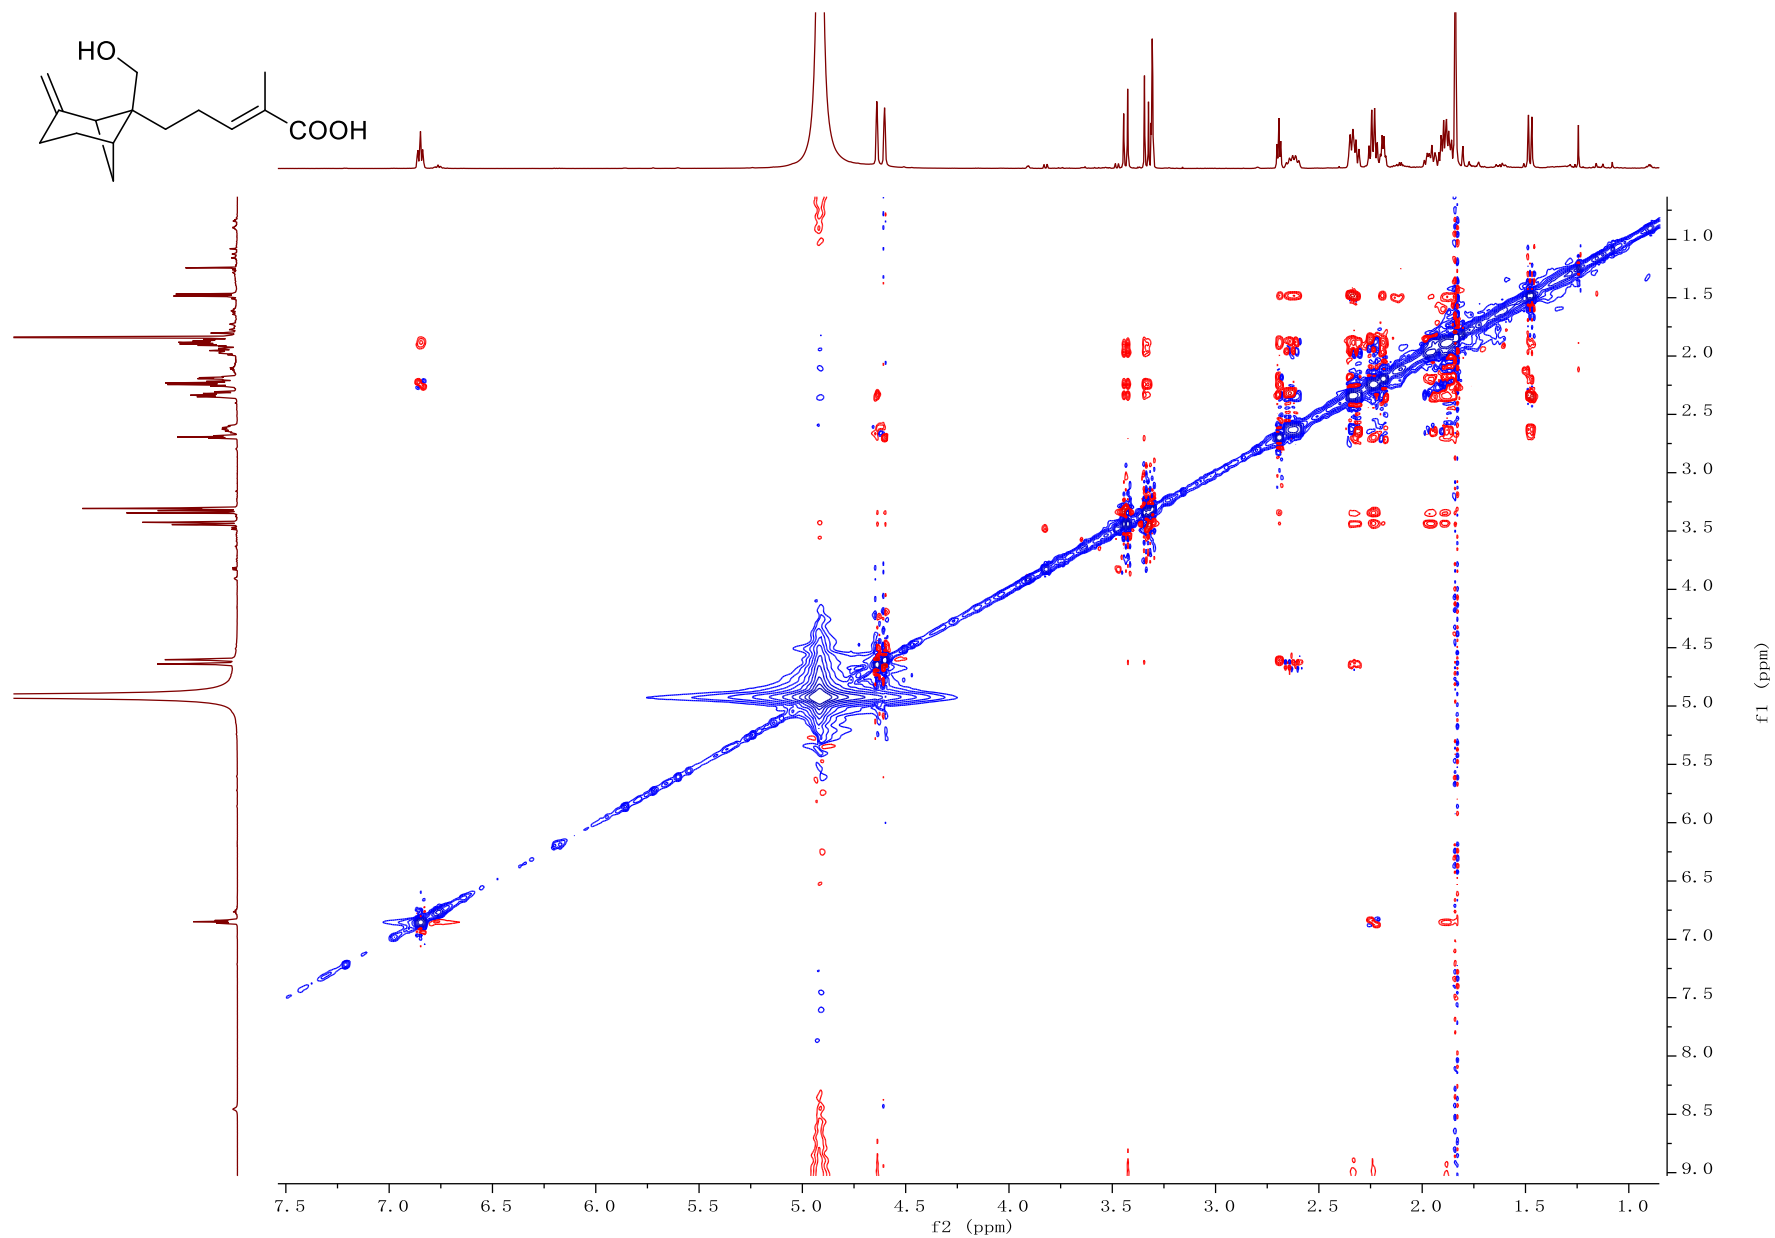

**Figure S135.** HR-ESIMS of compound **16**

T: FTMS + p ESI Full lock ms [150.0000-1100.0000]

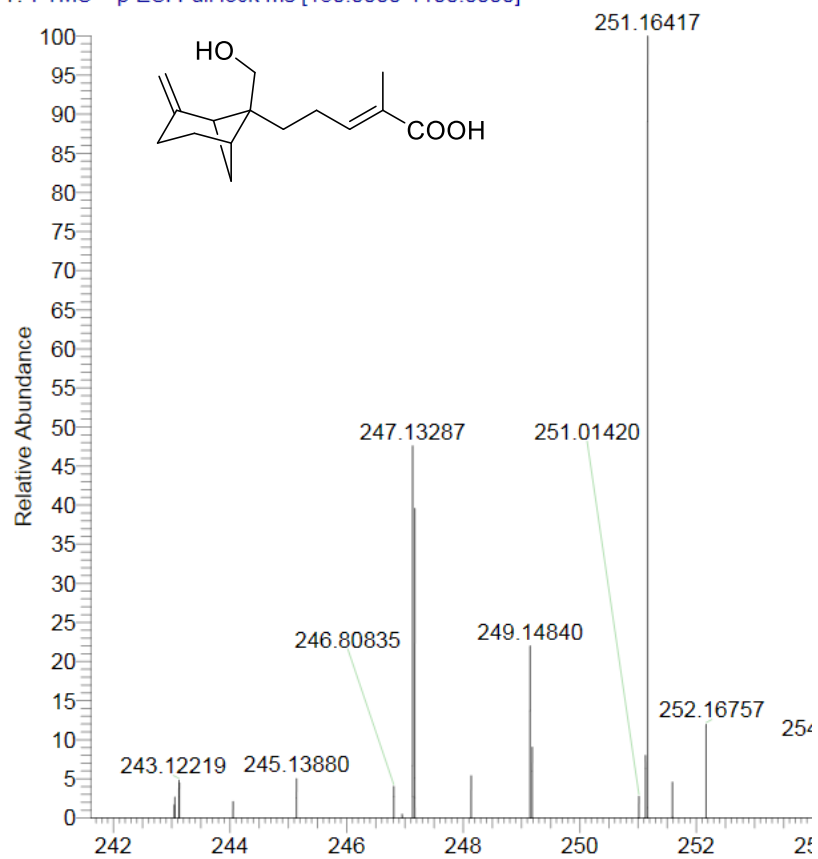

## Section S24. NMR and MS spectra for 17

Figure S136.  $^1\text{H}$  NMR of compound **17** in  $\text{CD}_3\text{OD}$

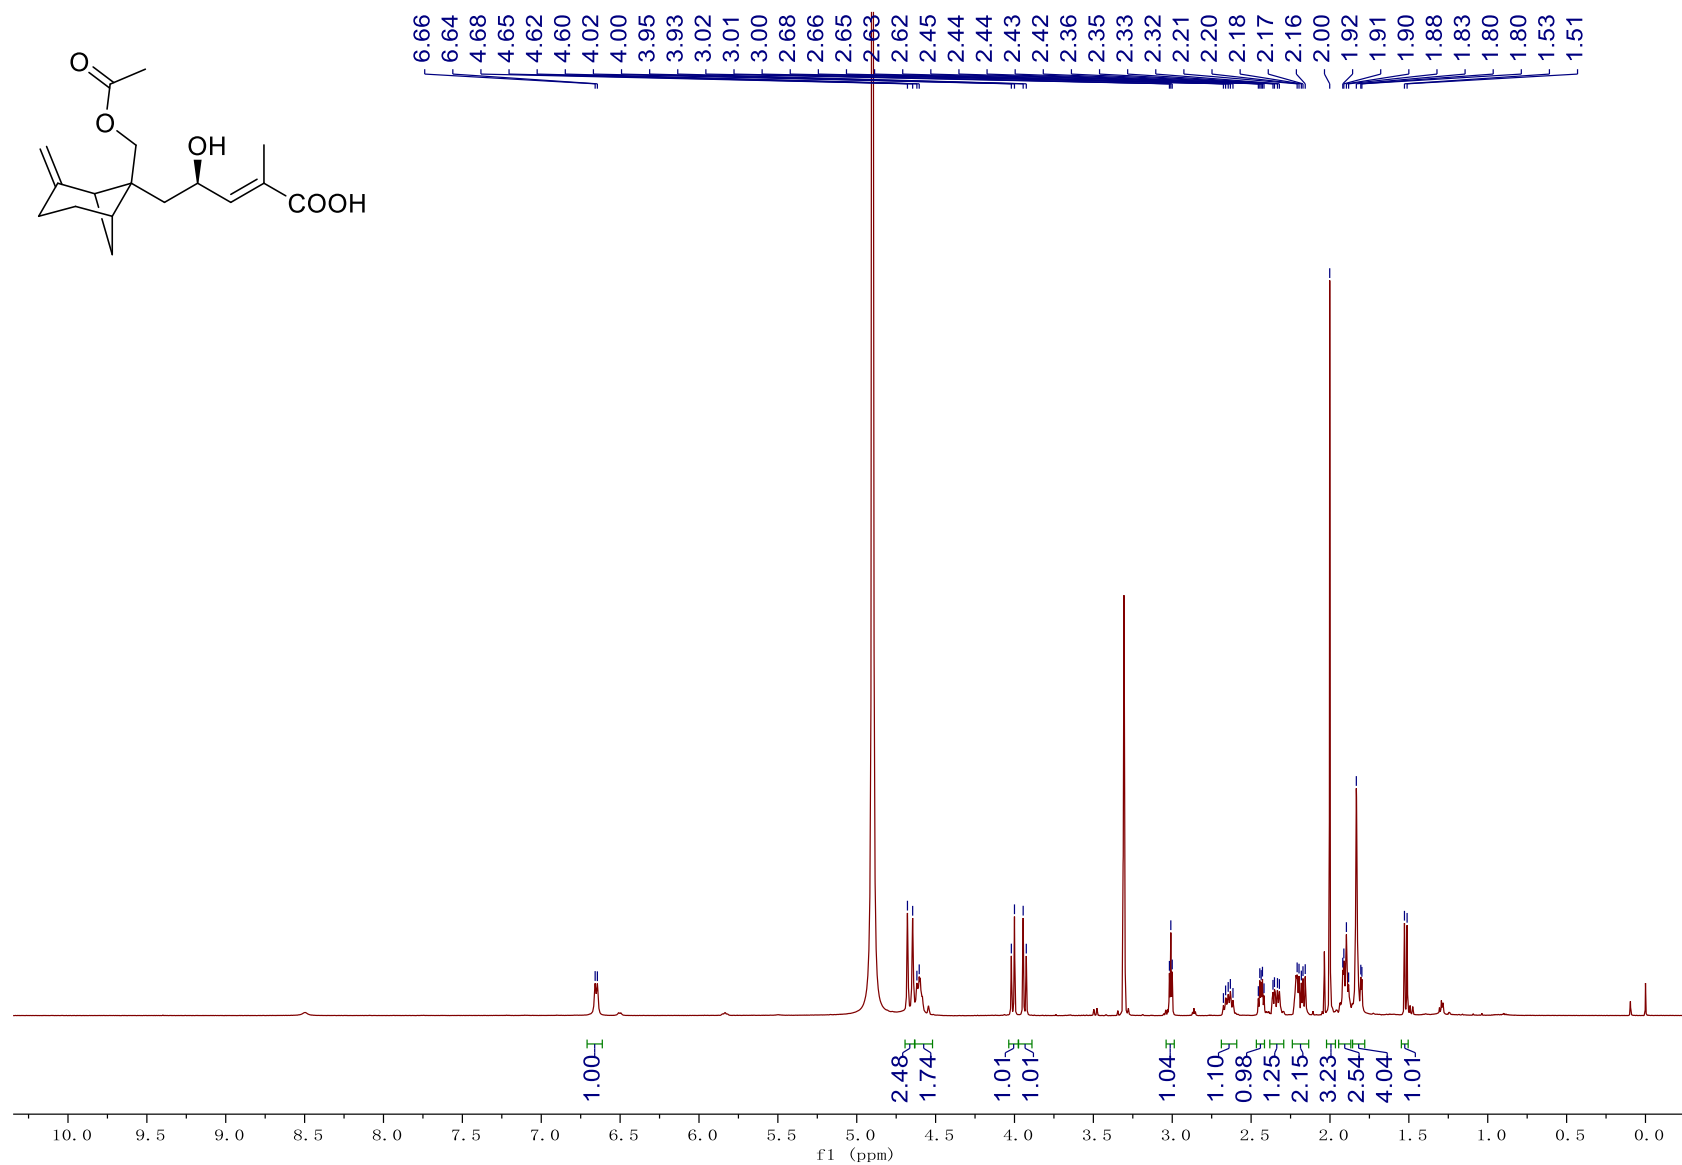

**Figure S137.**  $^{13}\text{C}$  NMR and DEPT of compound **17** in  $\text{CD}_3\text{OD}$

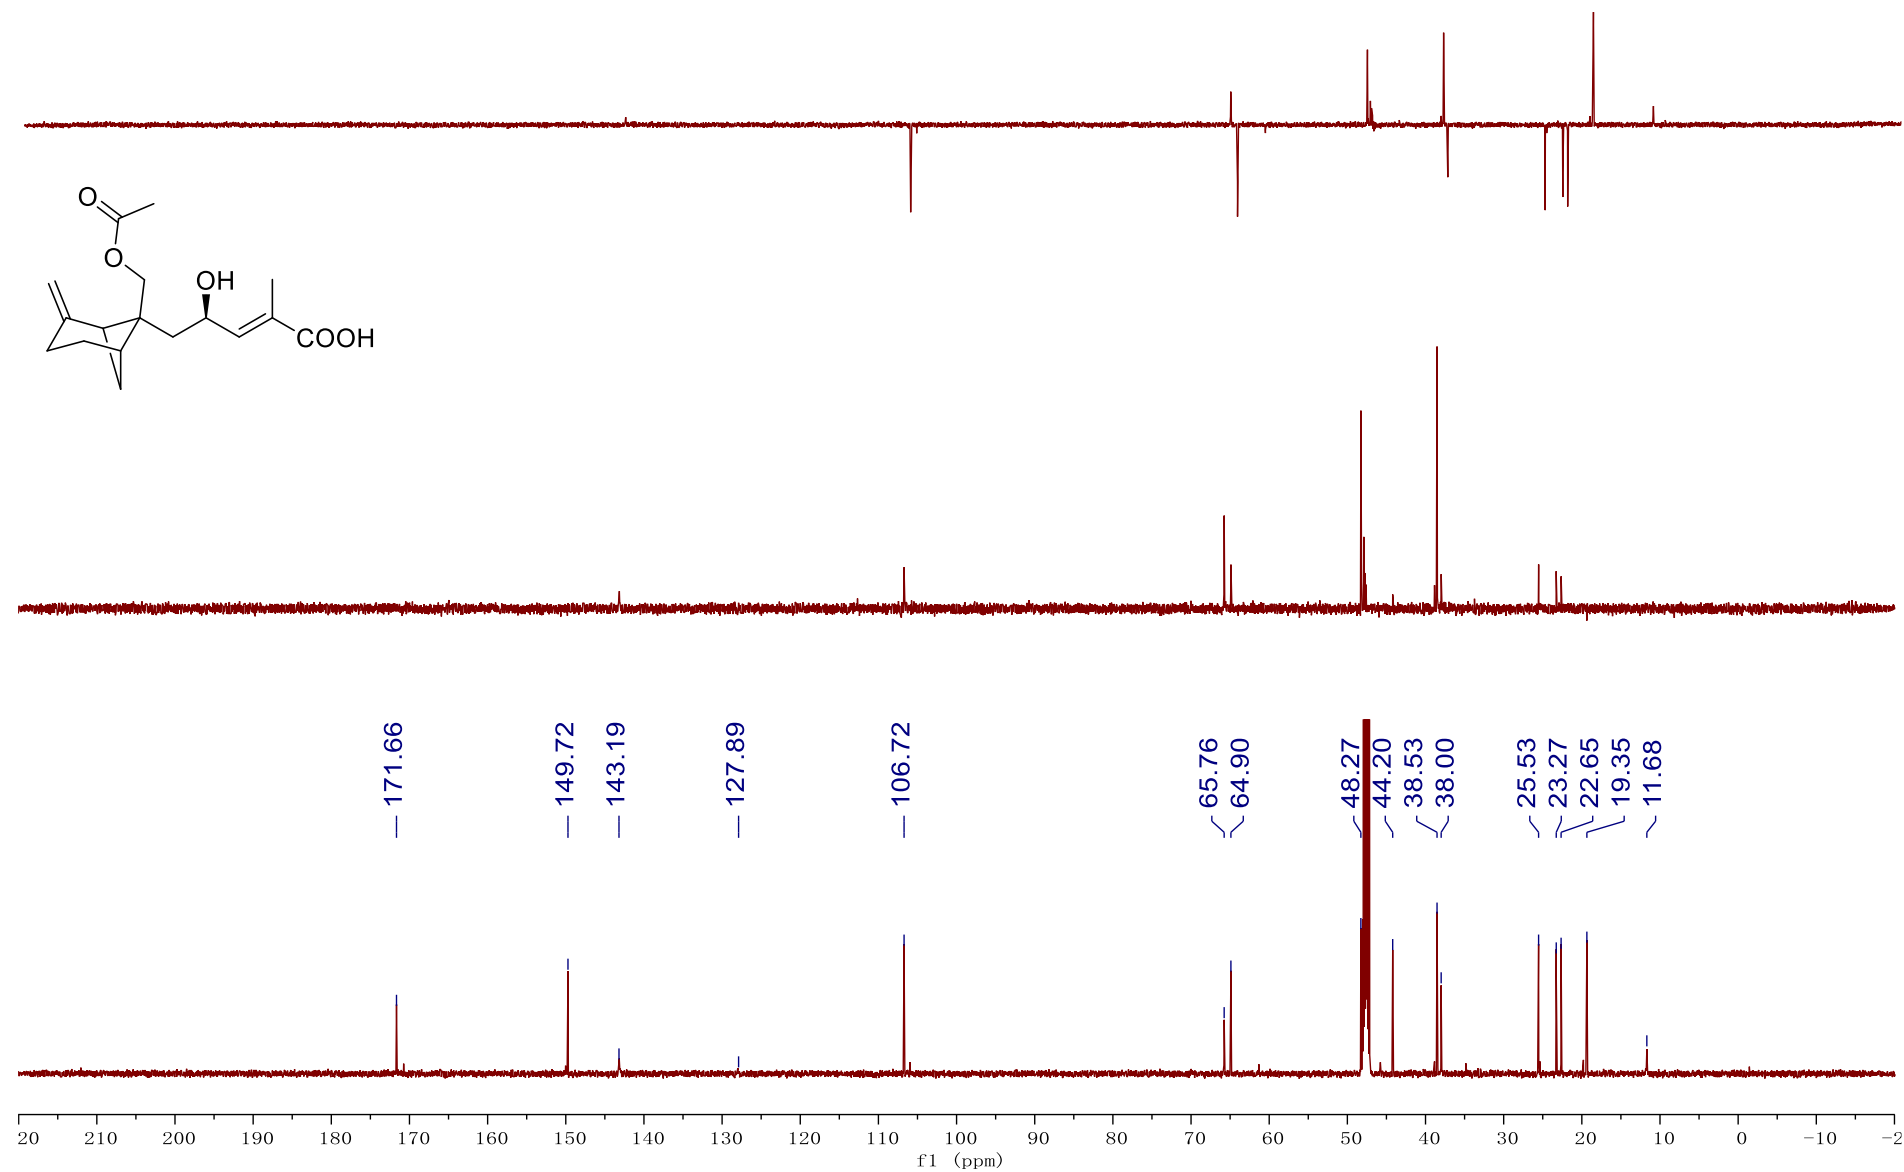

**Figure S138.** HSQC of compound **17** in CD<sub>3</sub>OD

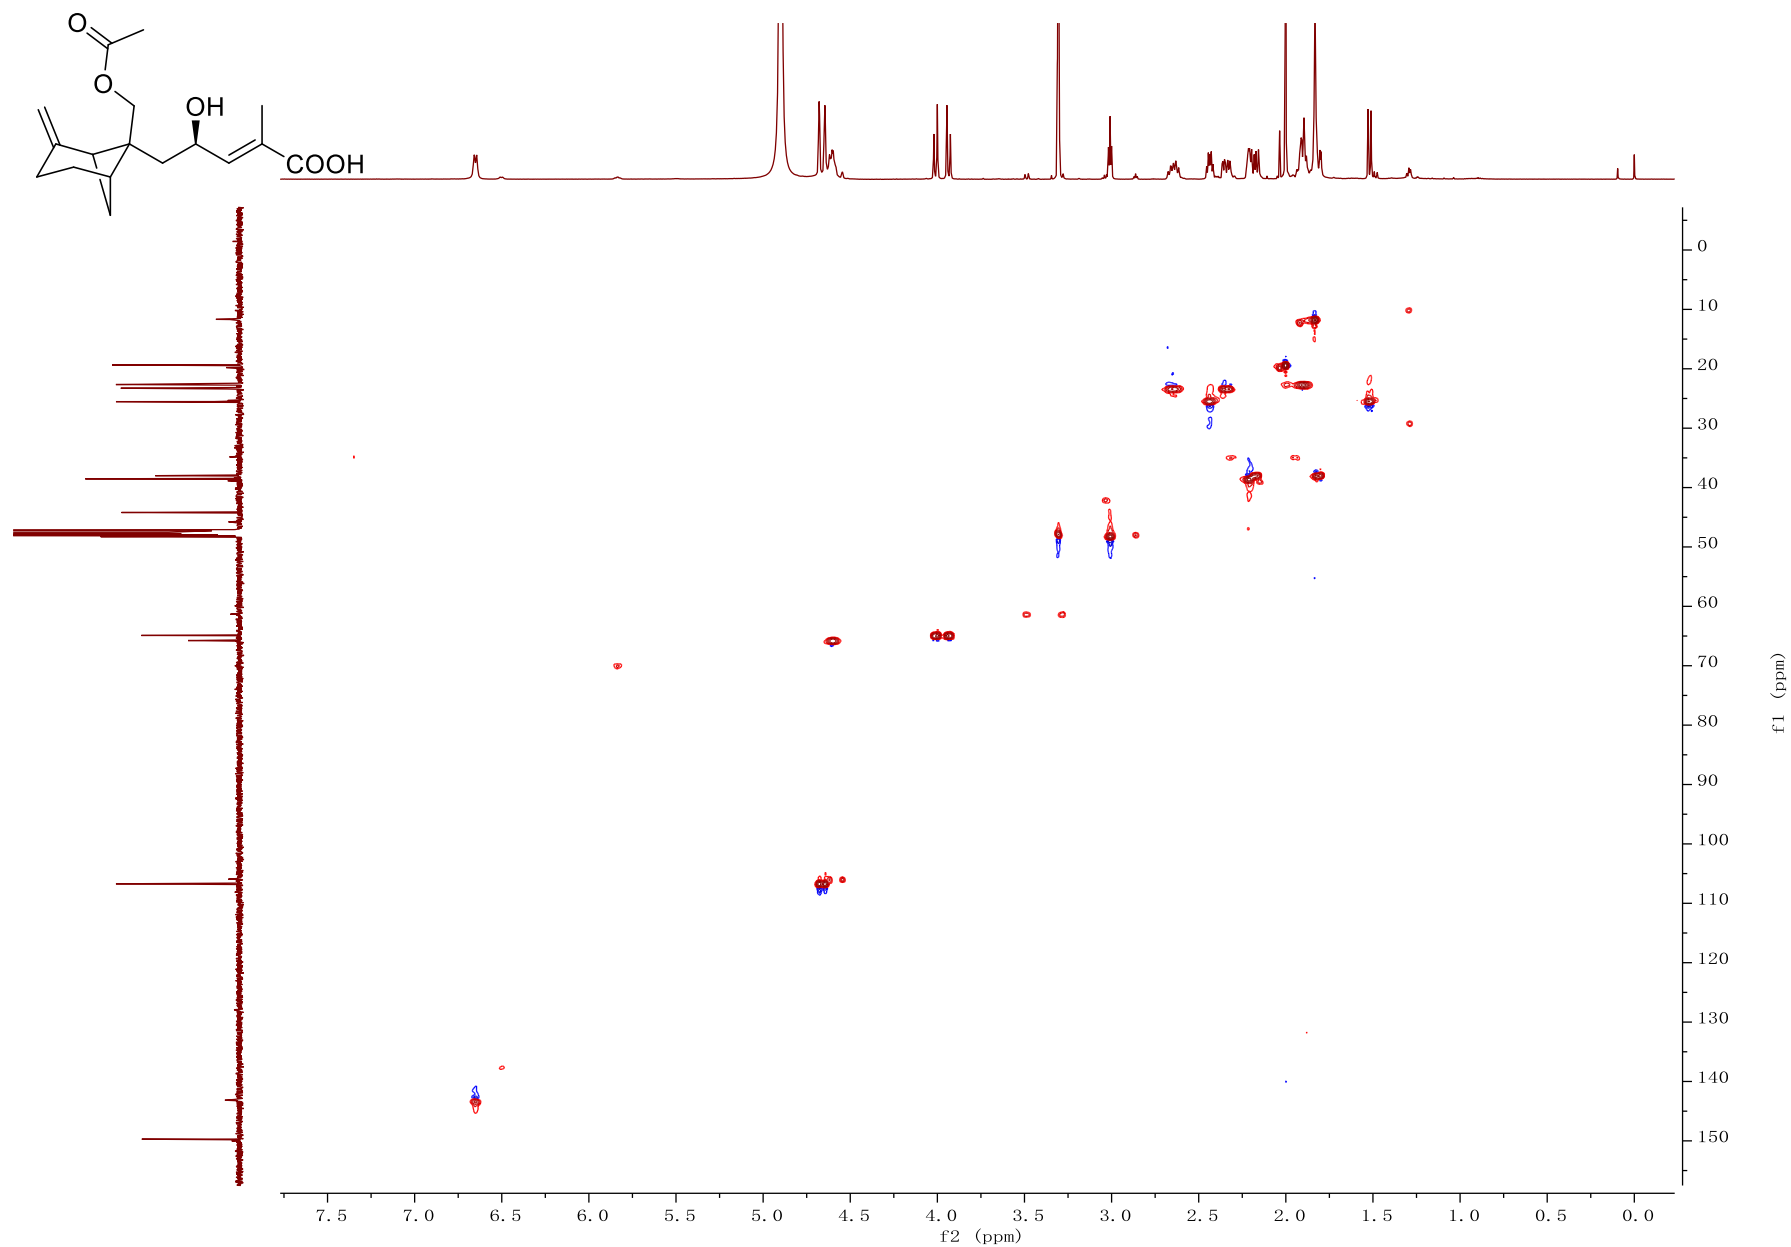

**Figure S139.** HMBC of compound **17** in CD<sub>3</sub>OD

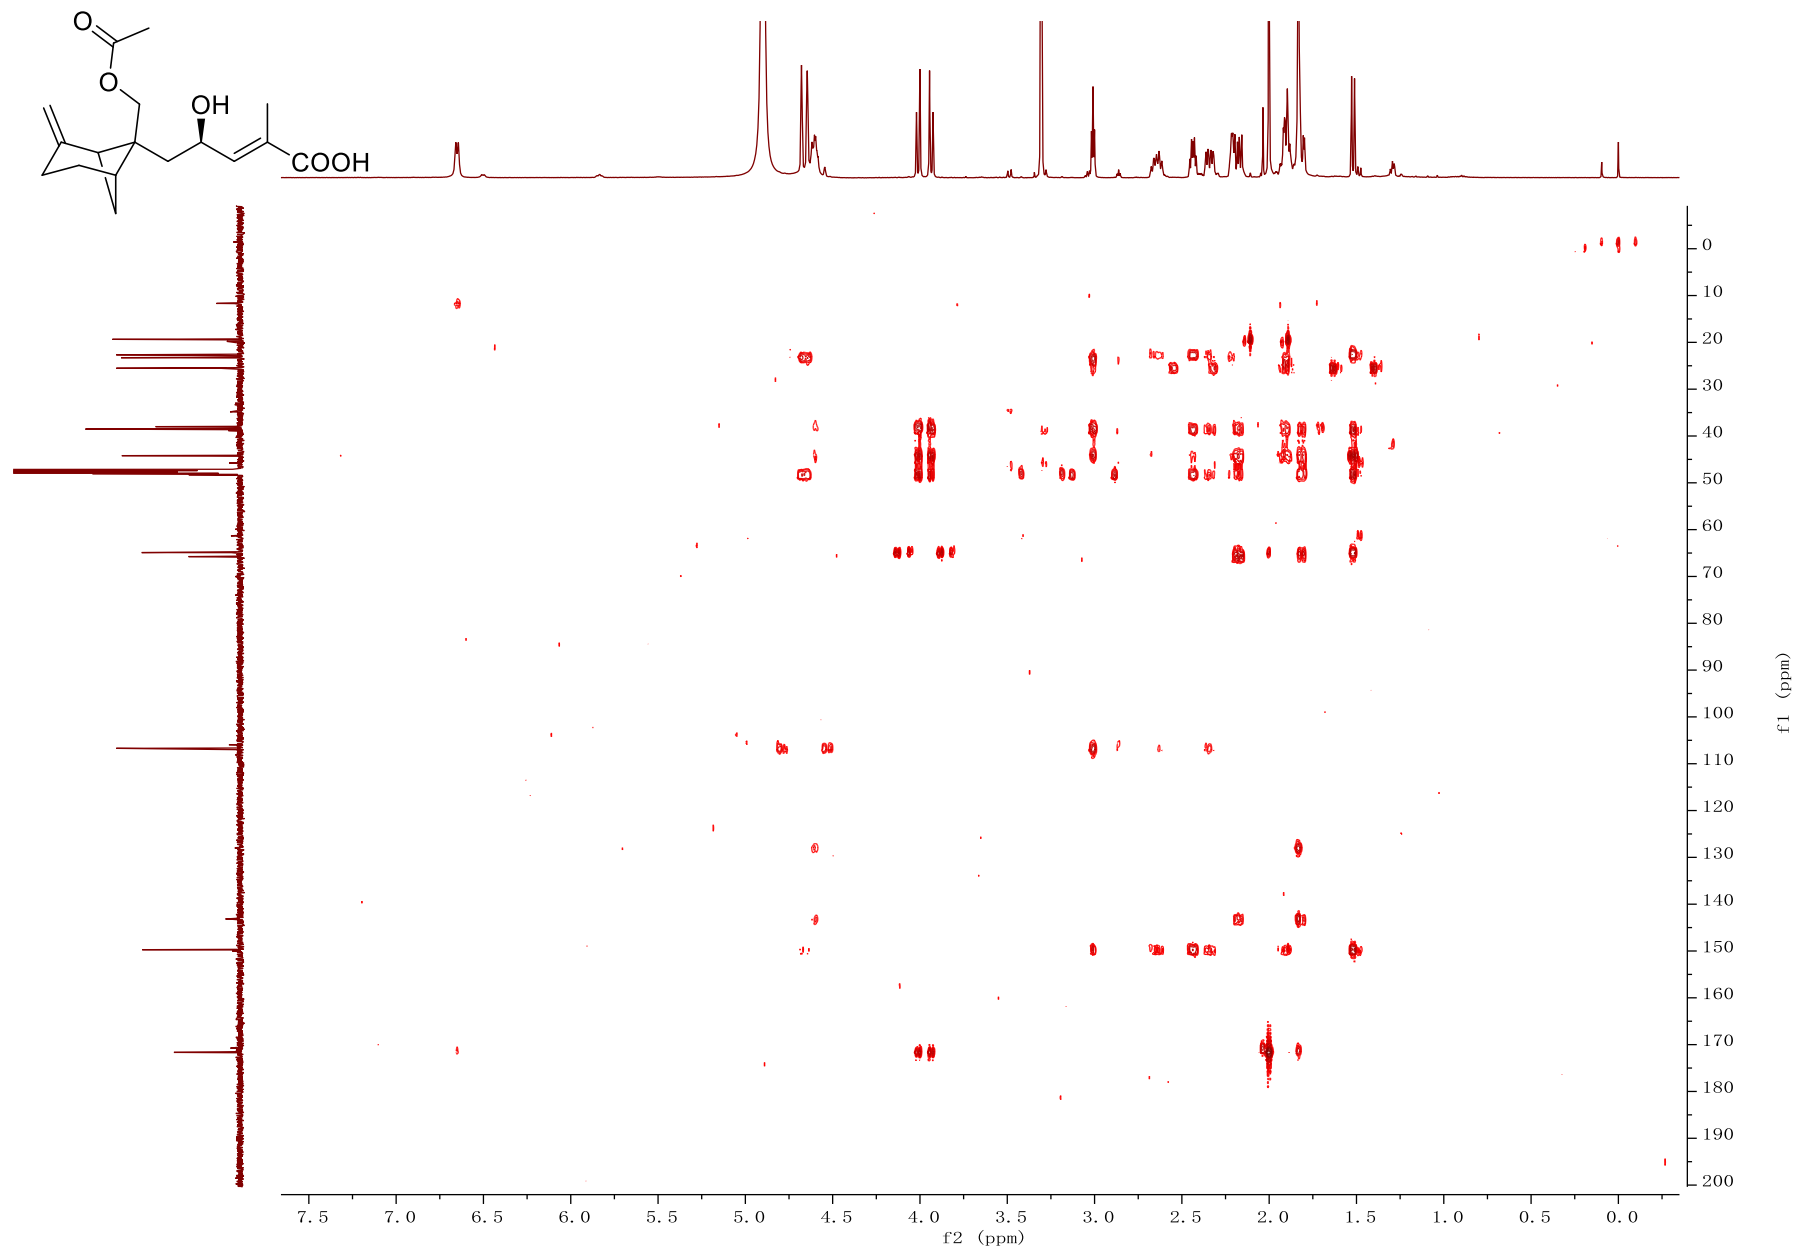

**Figure S140.**  $^1\text{H}$ - $^1\text{H}$  COSY of compound **17** in  $\text{CD}_3\text{OD}$

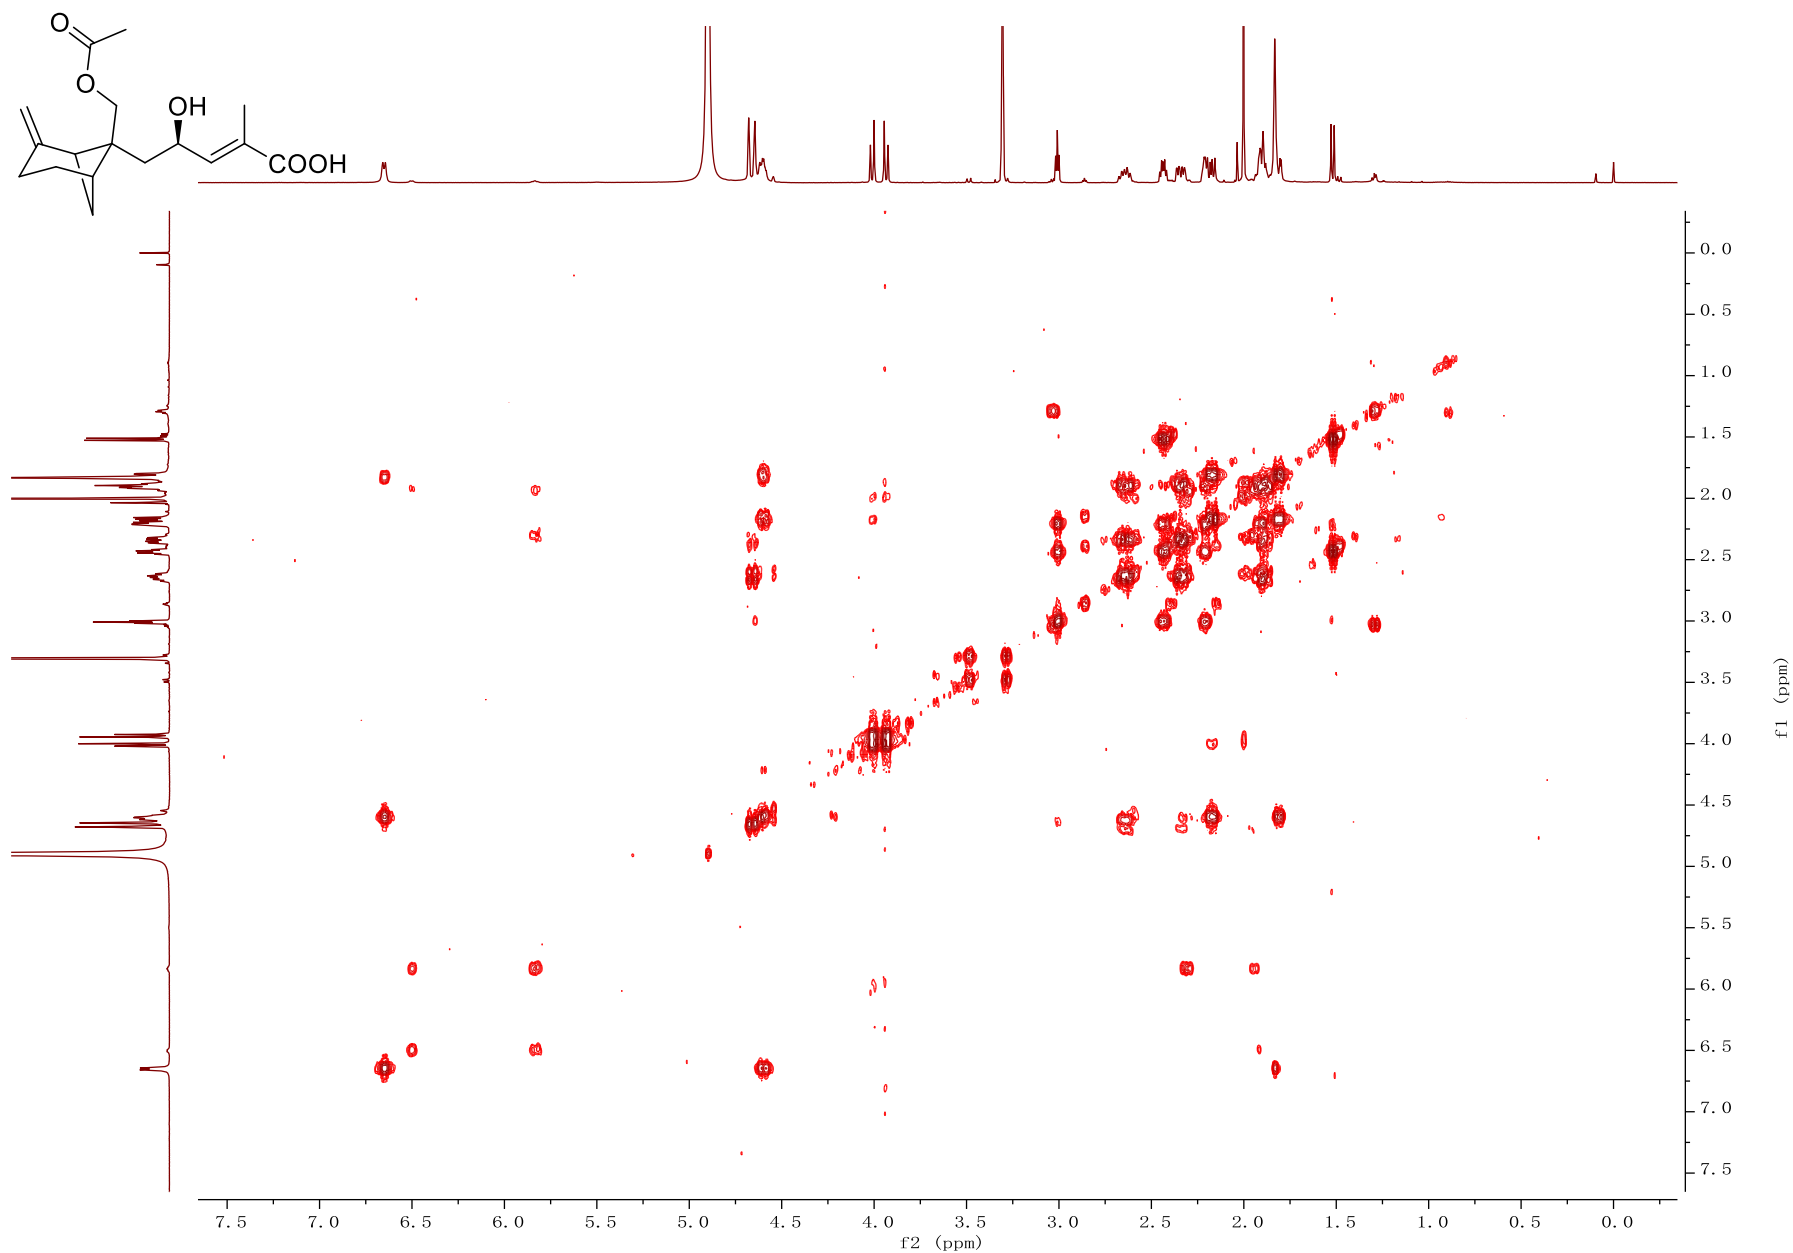



**Figure S141.** ROESY of compound **17** in CD<sub>3</sub>OD

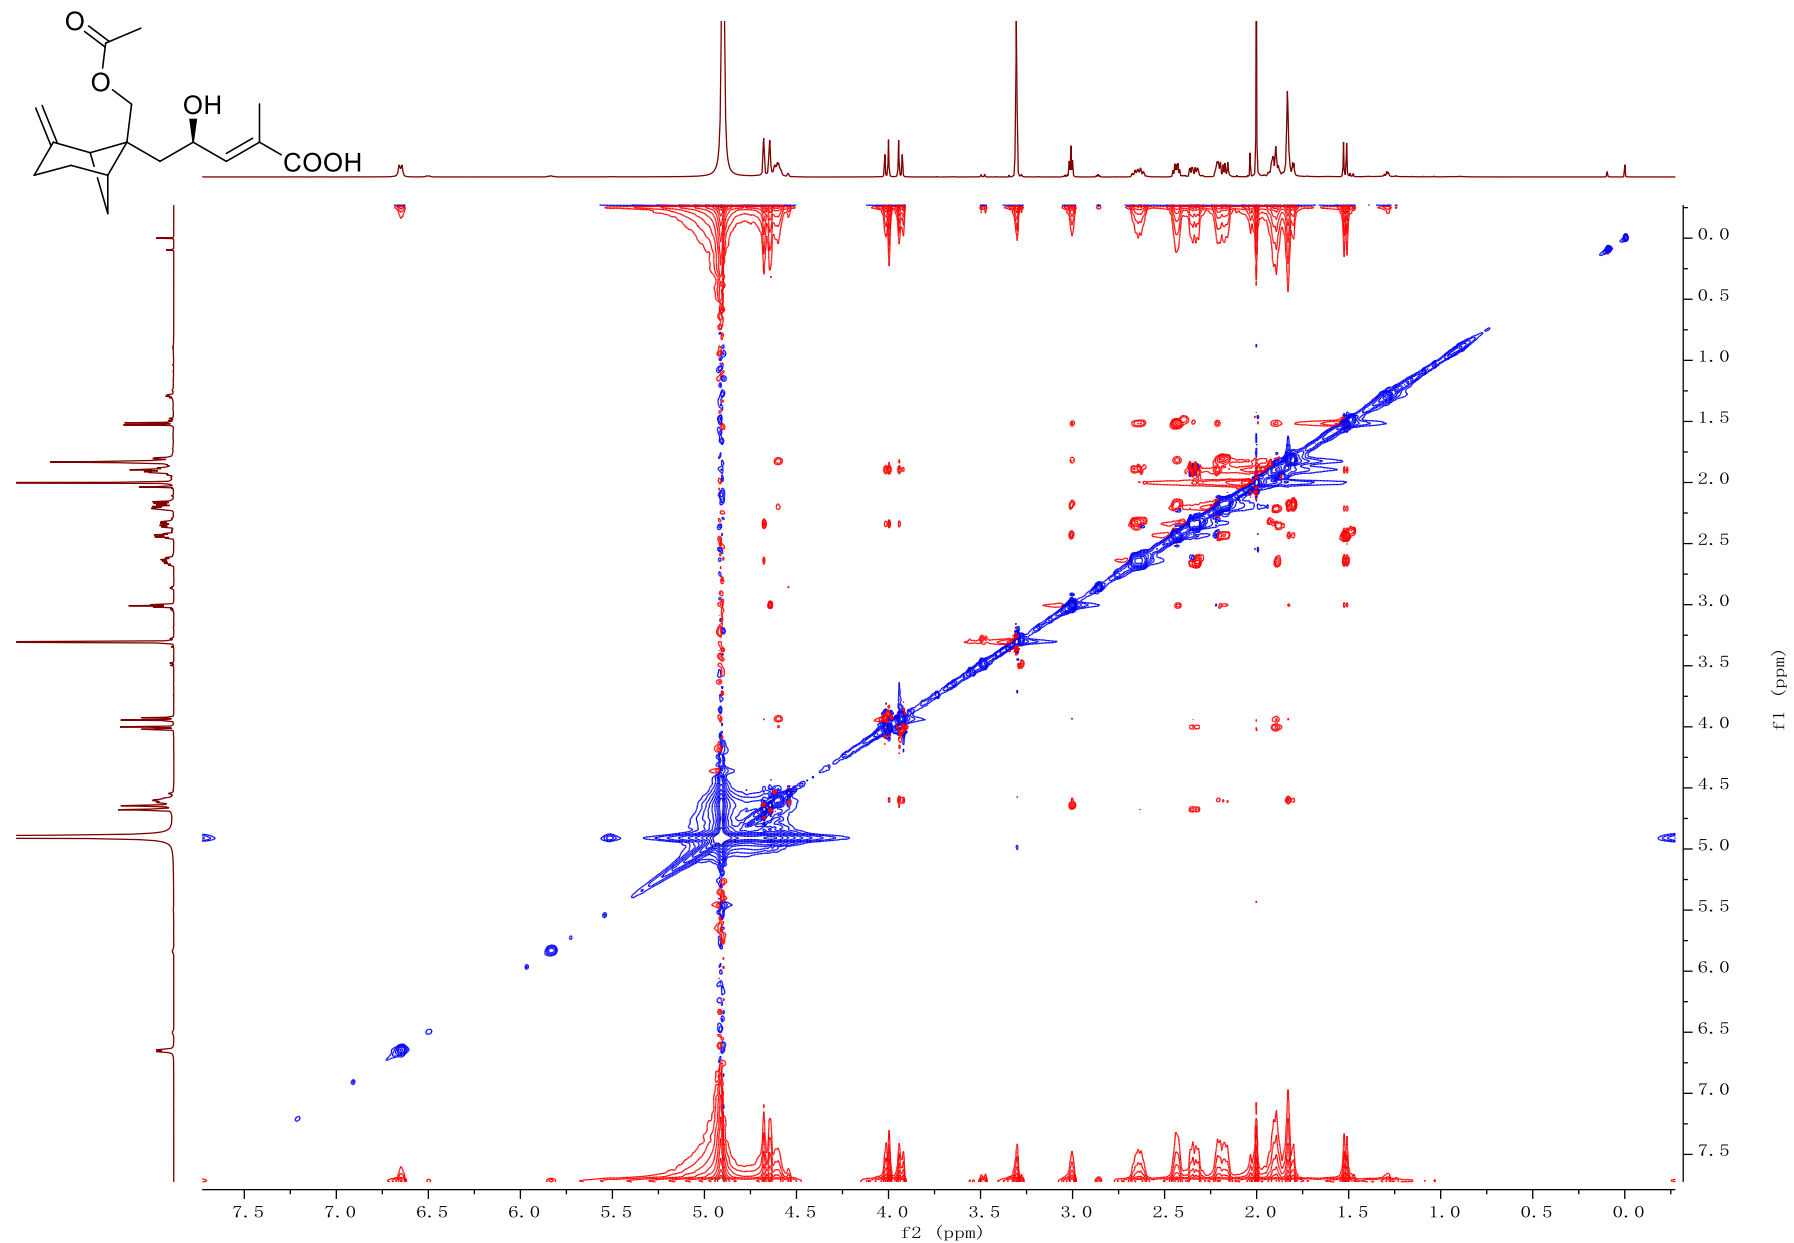

**Figure S142.** HR-ESIMS of compound **17**

FTMS<sup>+</sup> p ESI Full lock ms [150.0000-1100.0000]

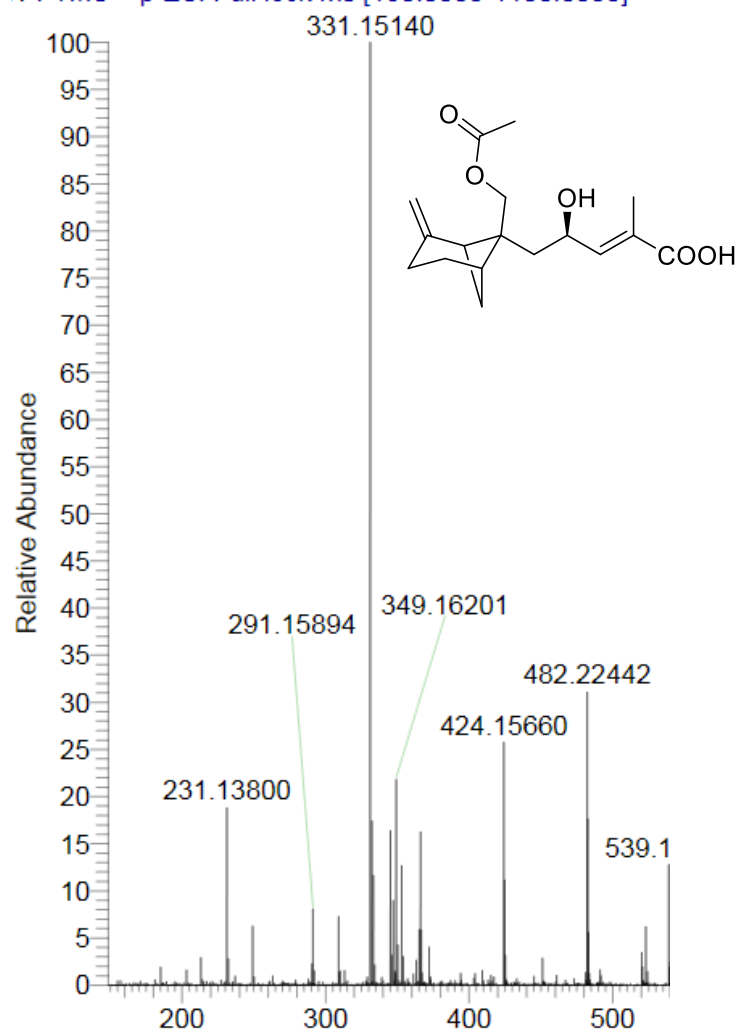

## Section S25. NMR and MS spectra for 18

Figure S143.  $^1\text{H}$  NMR of compound **18** in  $\text{CD}_3\text{OD}$

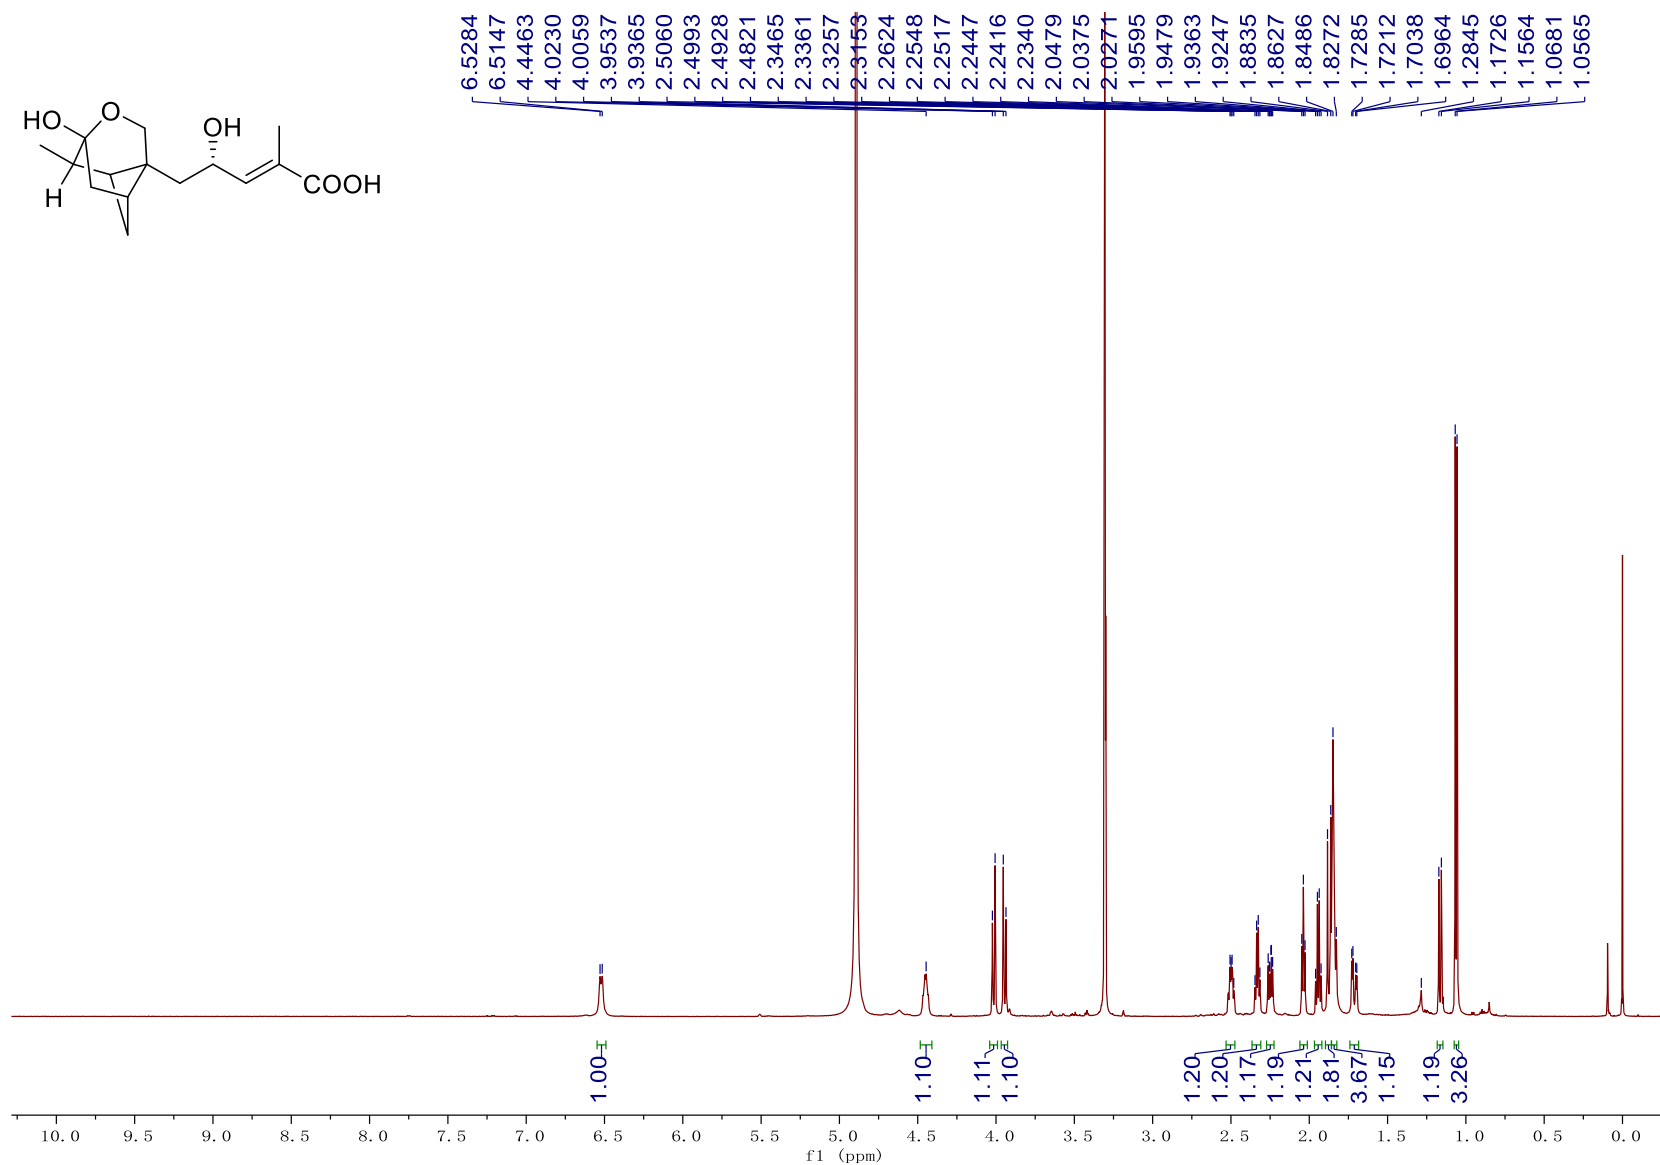

**Figure S144.**  $^{13}\text{C}$  NMR and DEPT of compound **18** in  $\text{CD}_3\text{OD}$

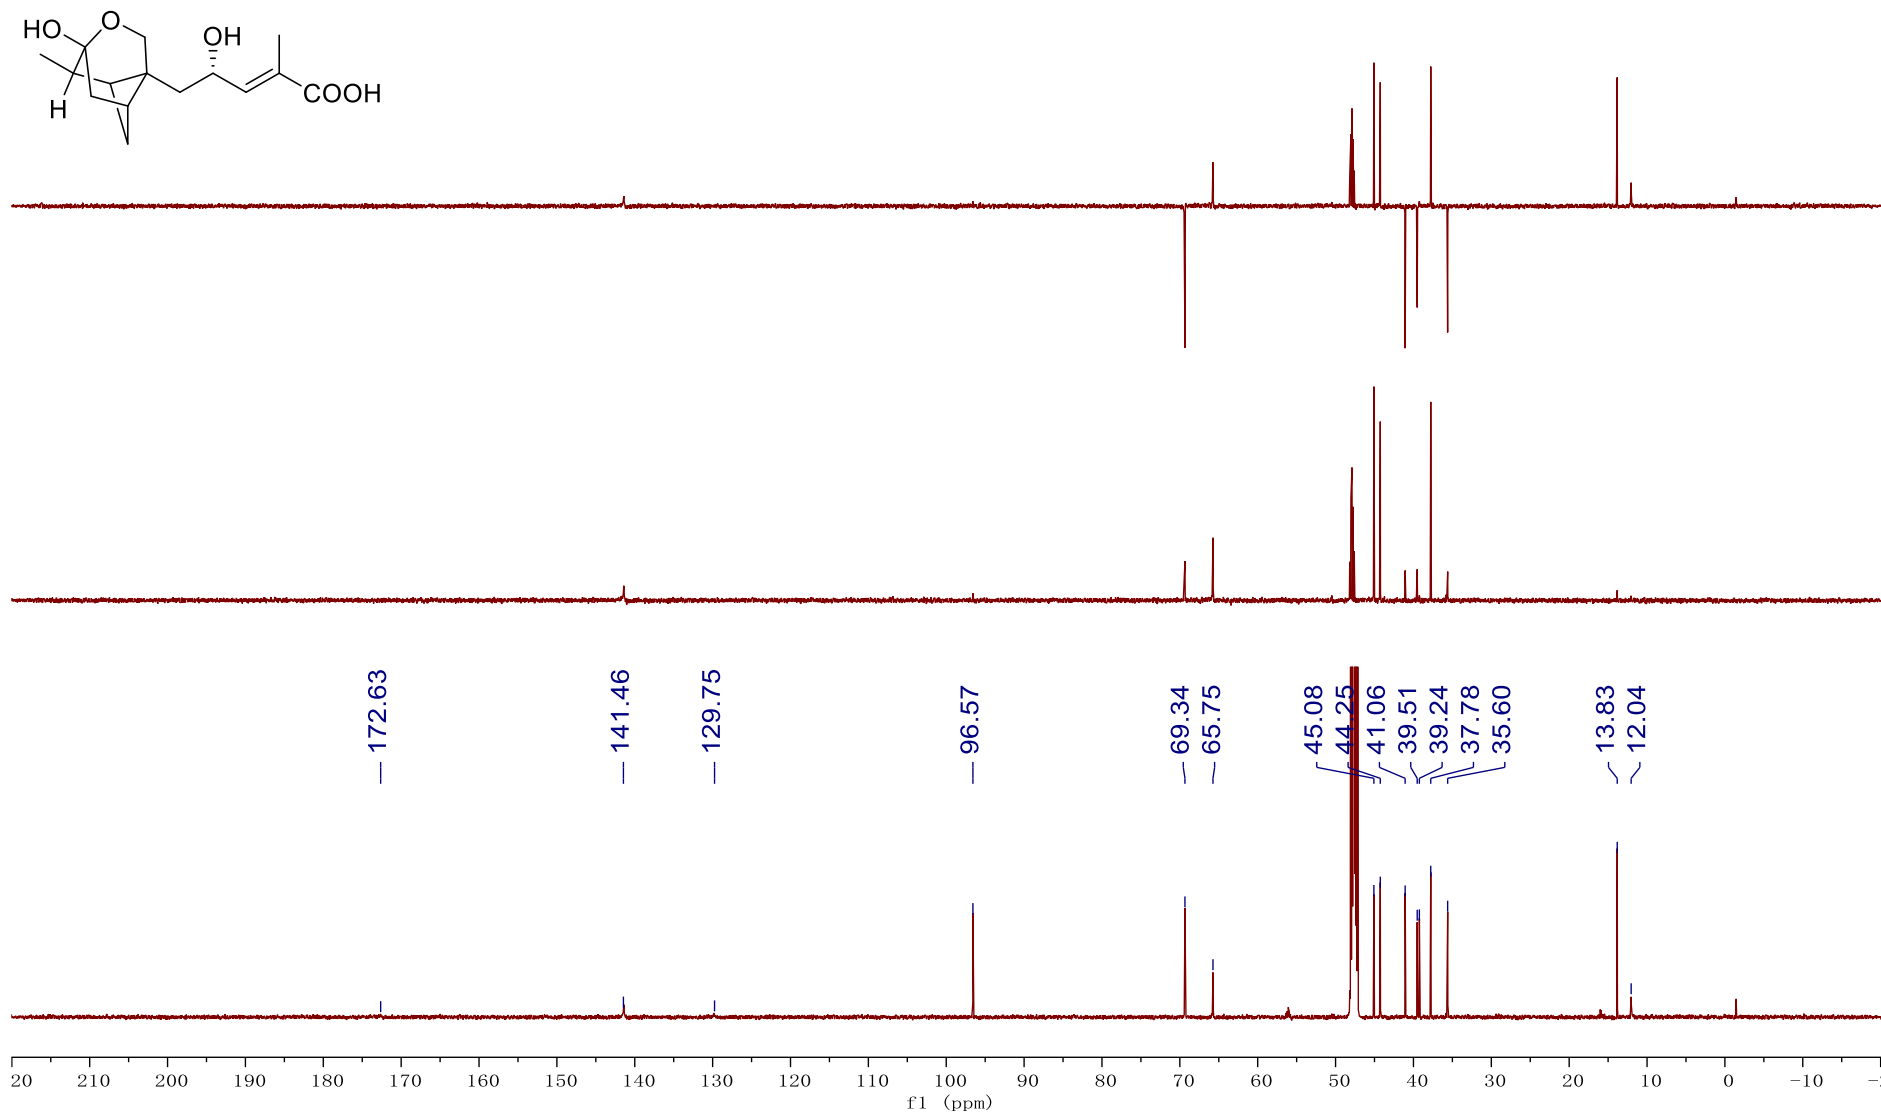

**Figure S145.** HSQC of compound **18** in CD<sub>3</sub>OD

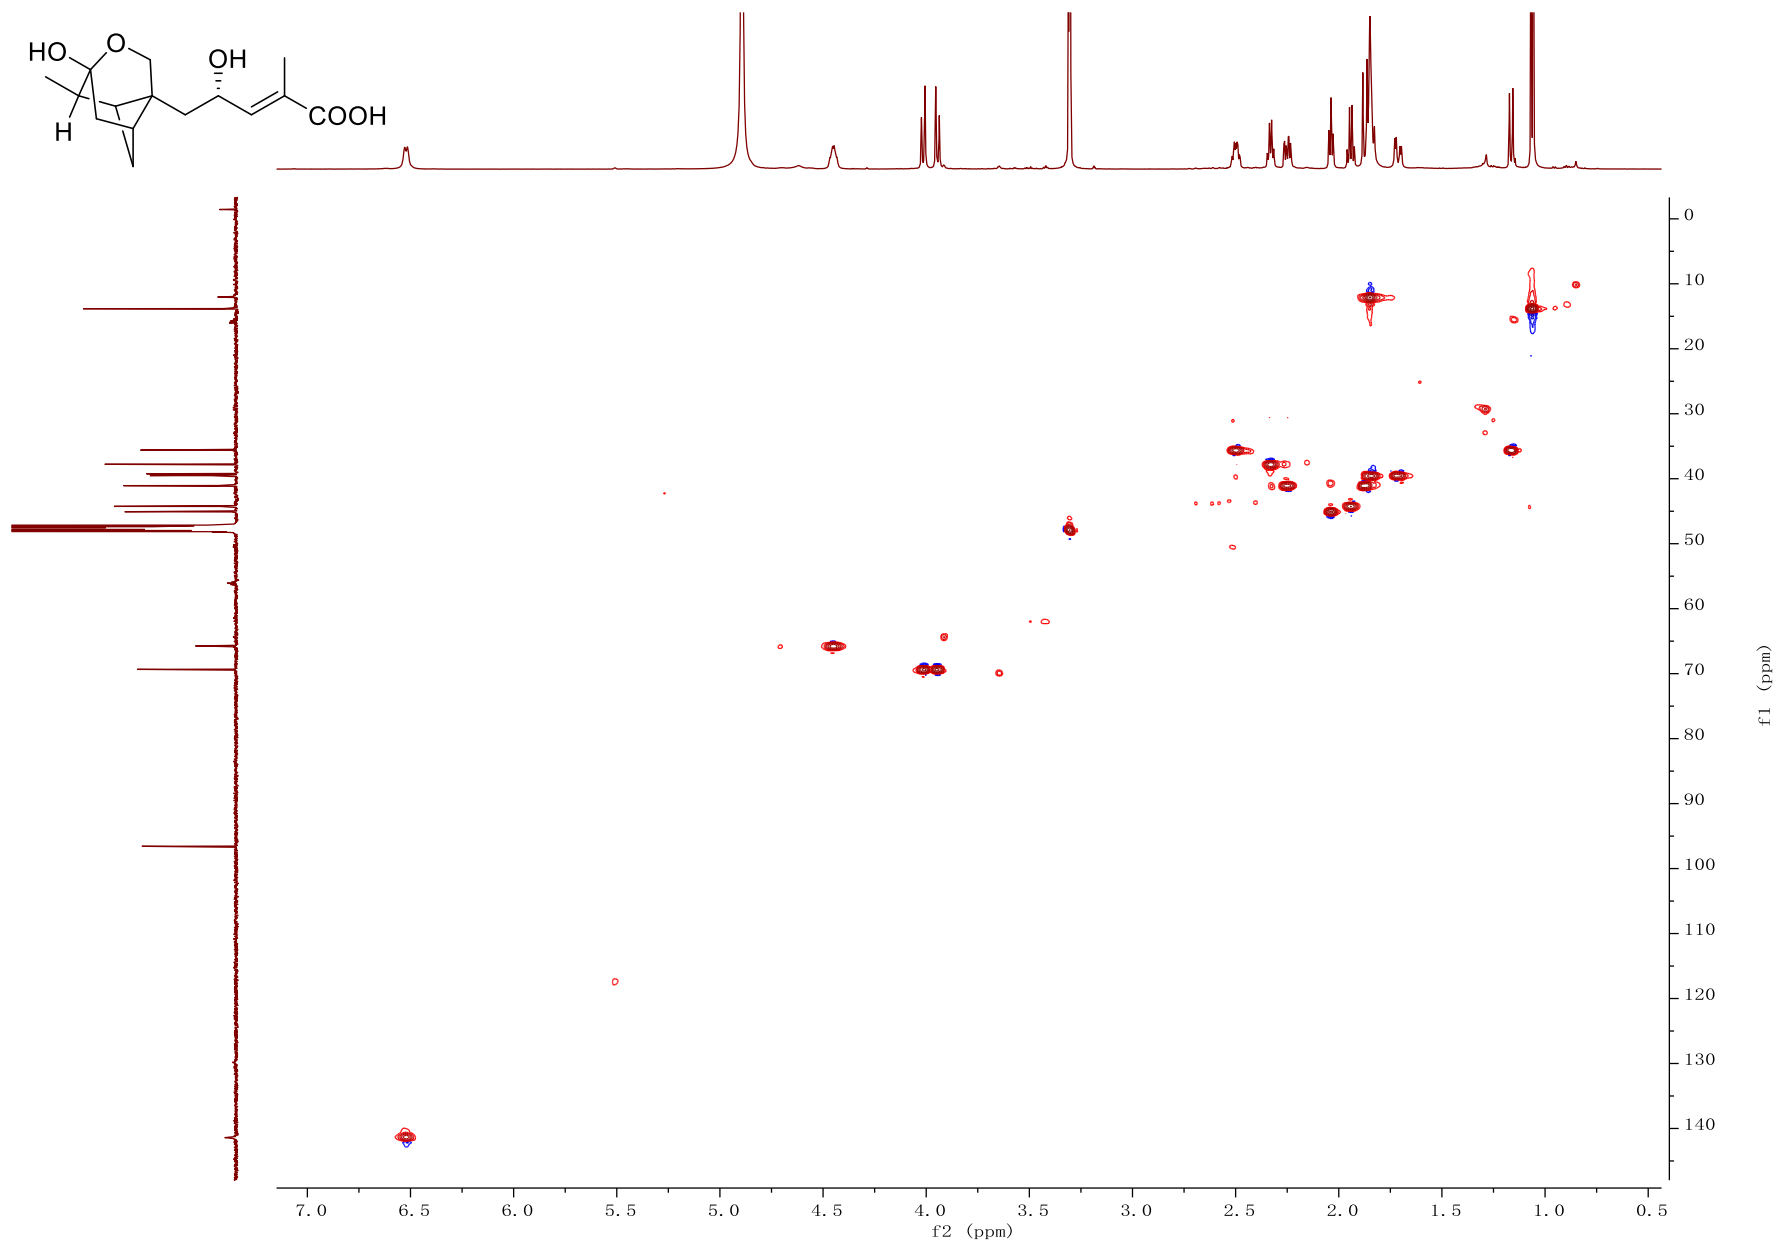

**Figure S146.** HMBC of compound **18** in CD<sub>3</sub>OD

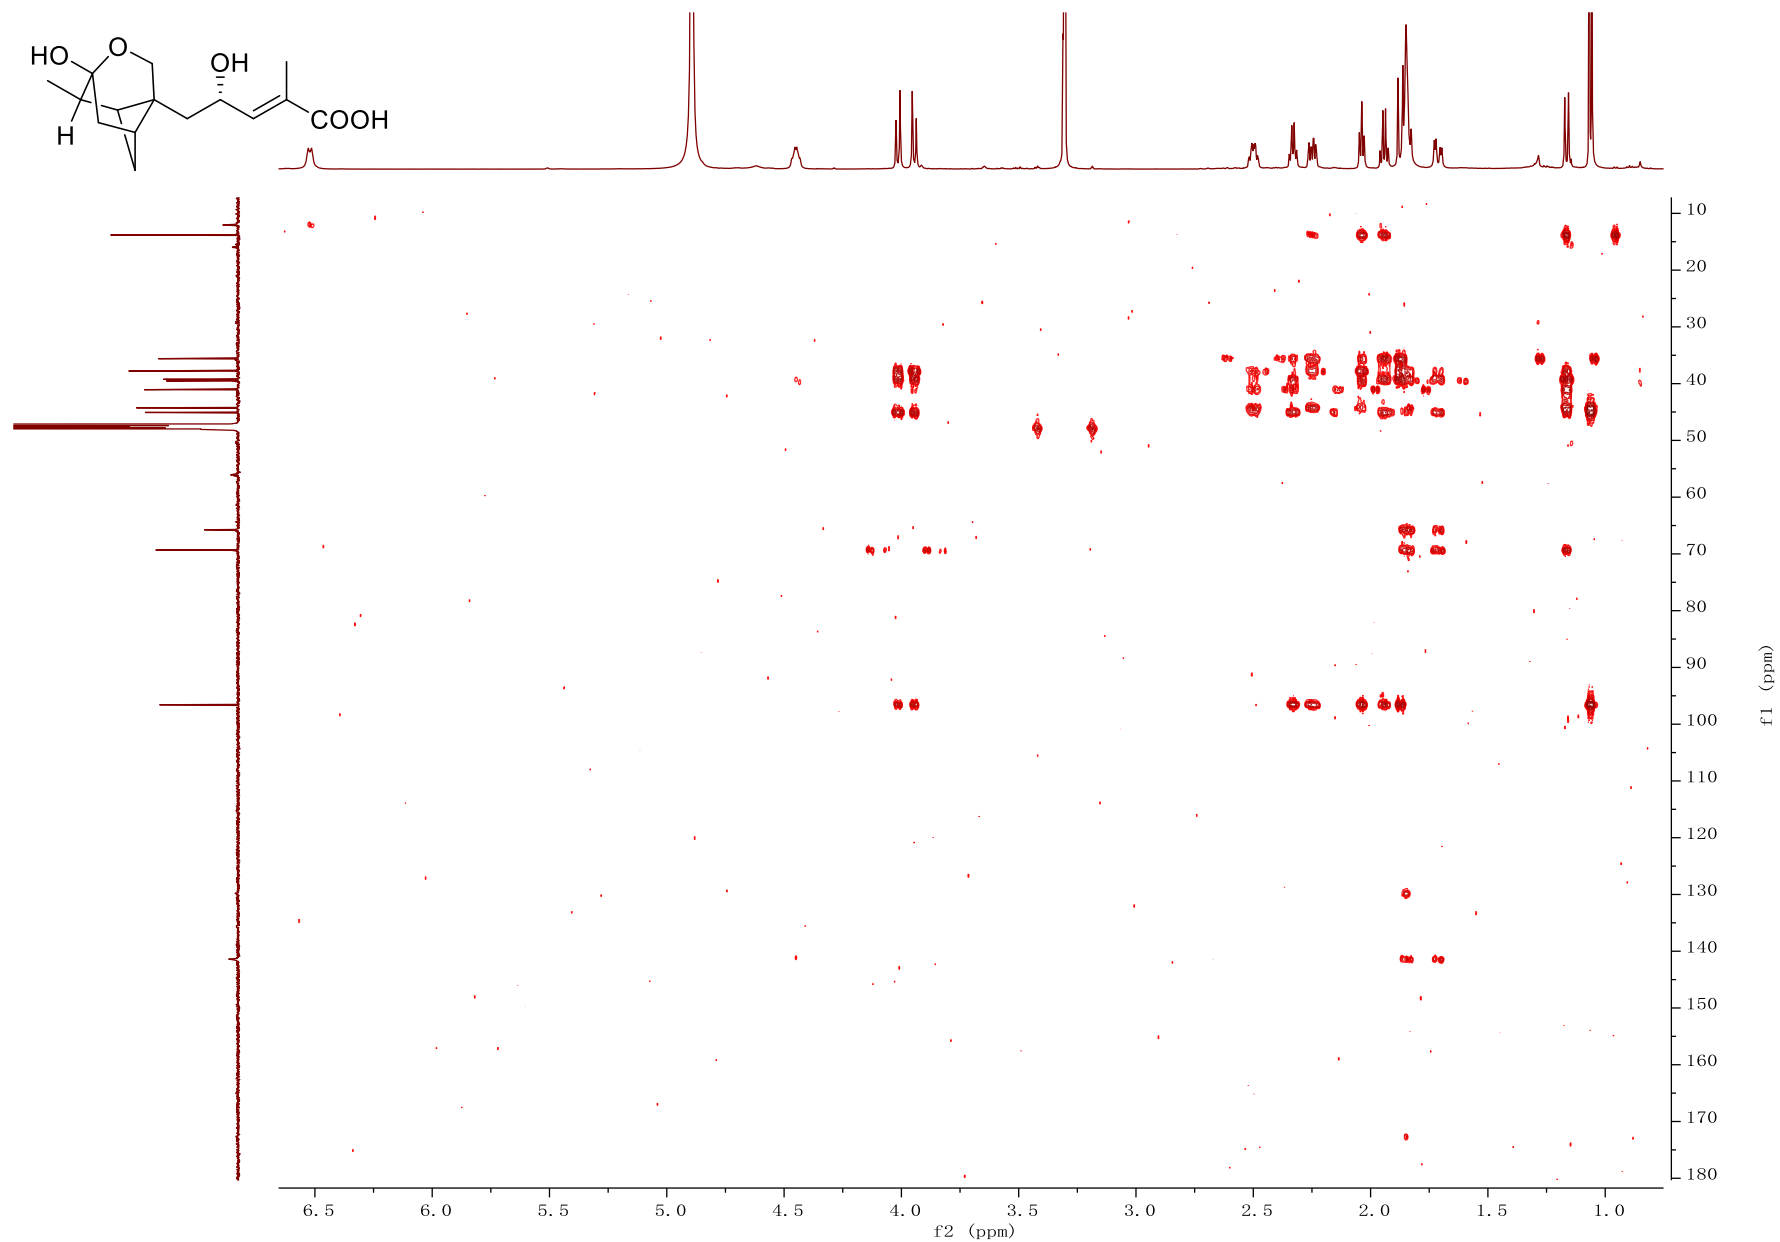

**Figure S147.**  $^1\text{H}$ - $^1\text{H}$  COSY of compound **18** in  $\text{CD}_3\text{OD}$

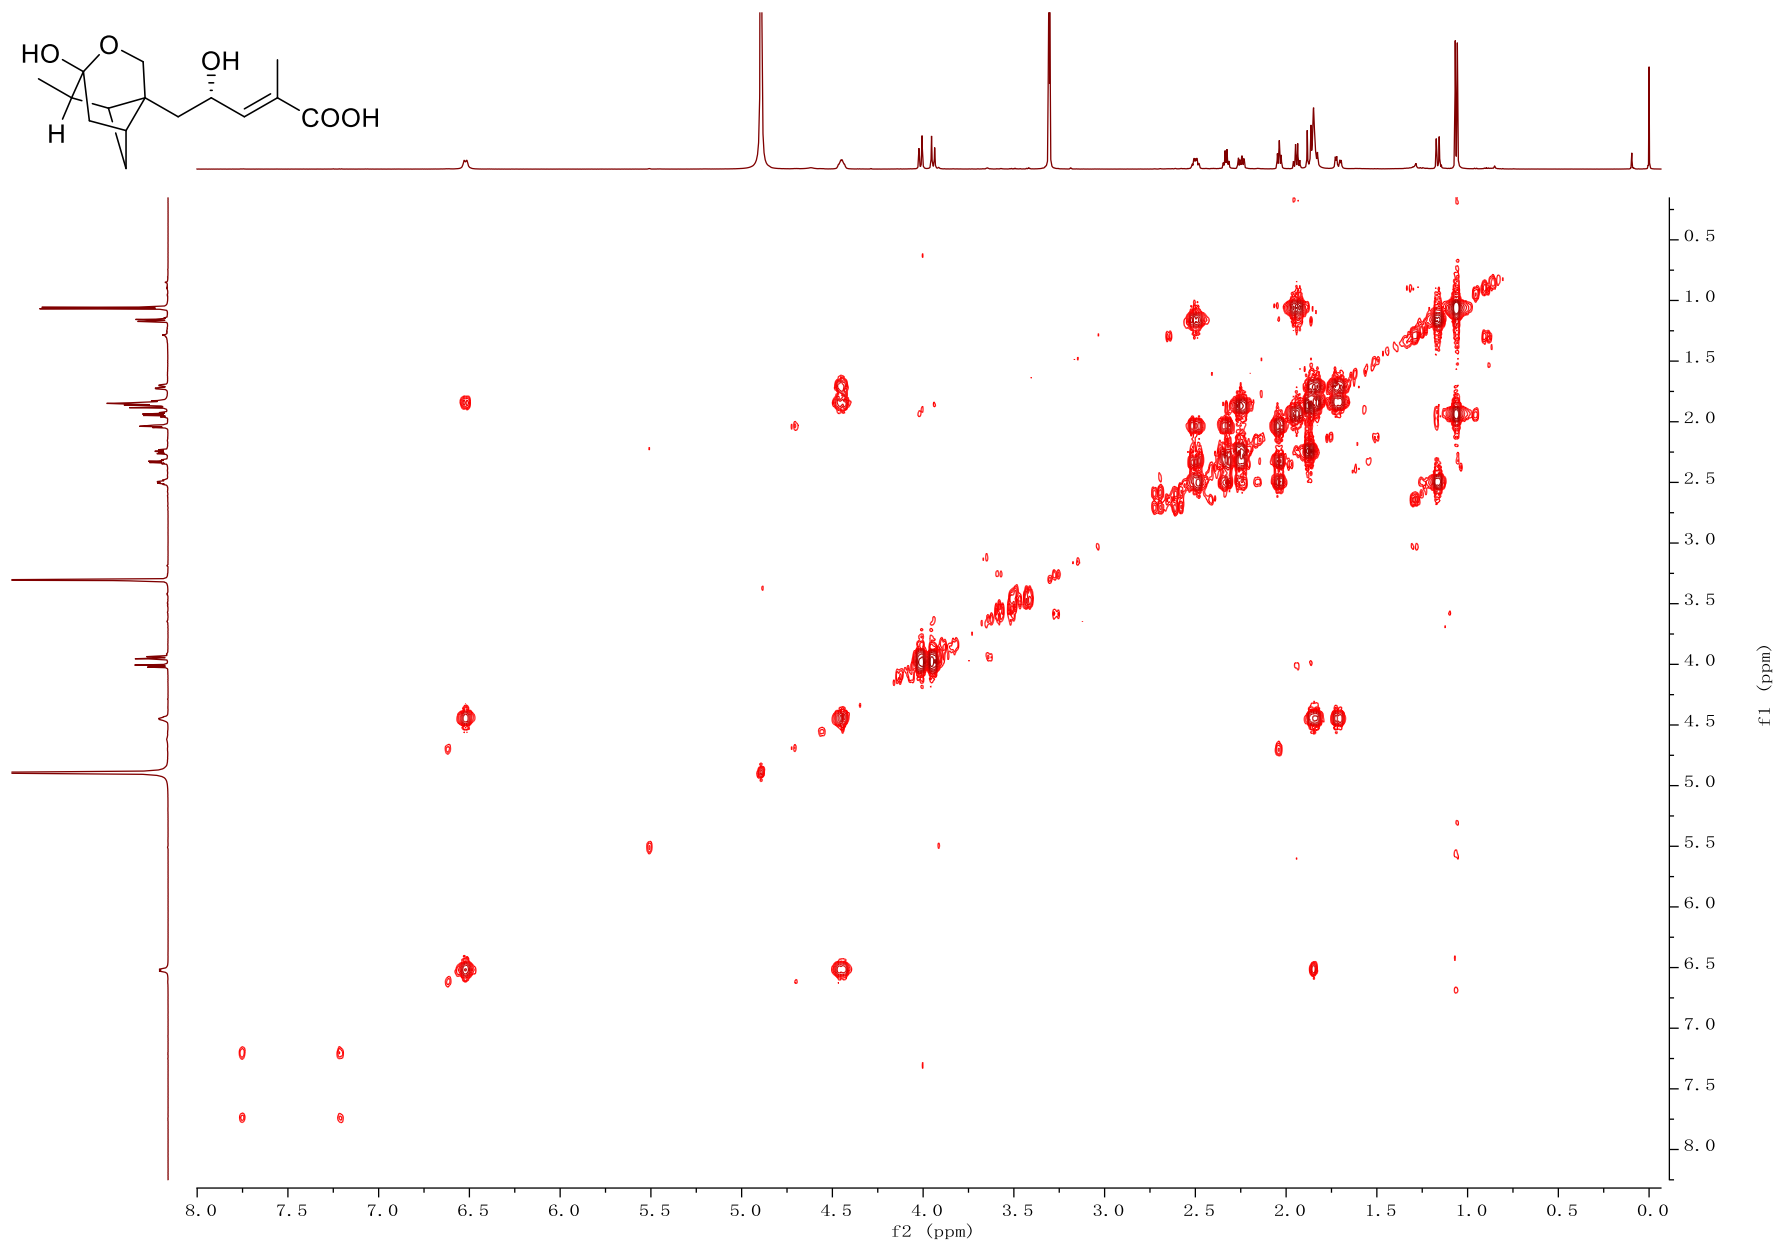

**Figure S148.** ROESY of compound **18** in CD<sub>3</sub>OD

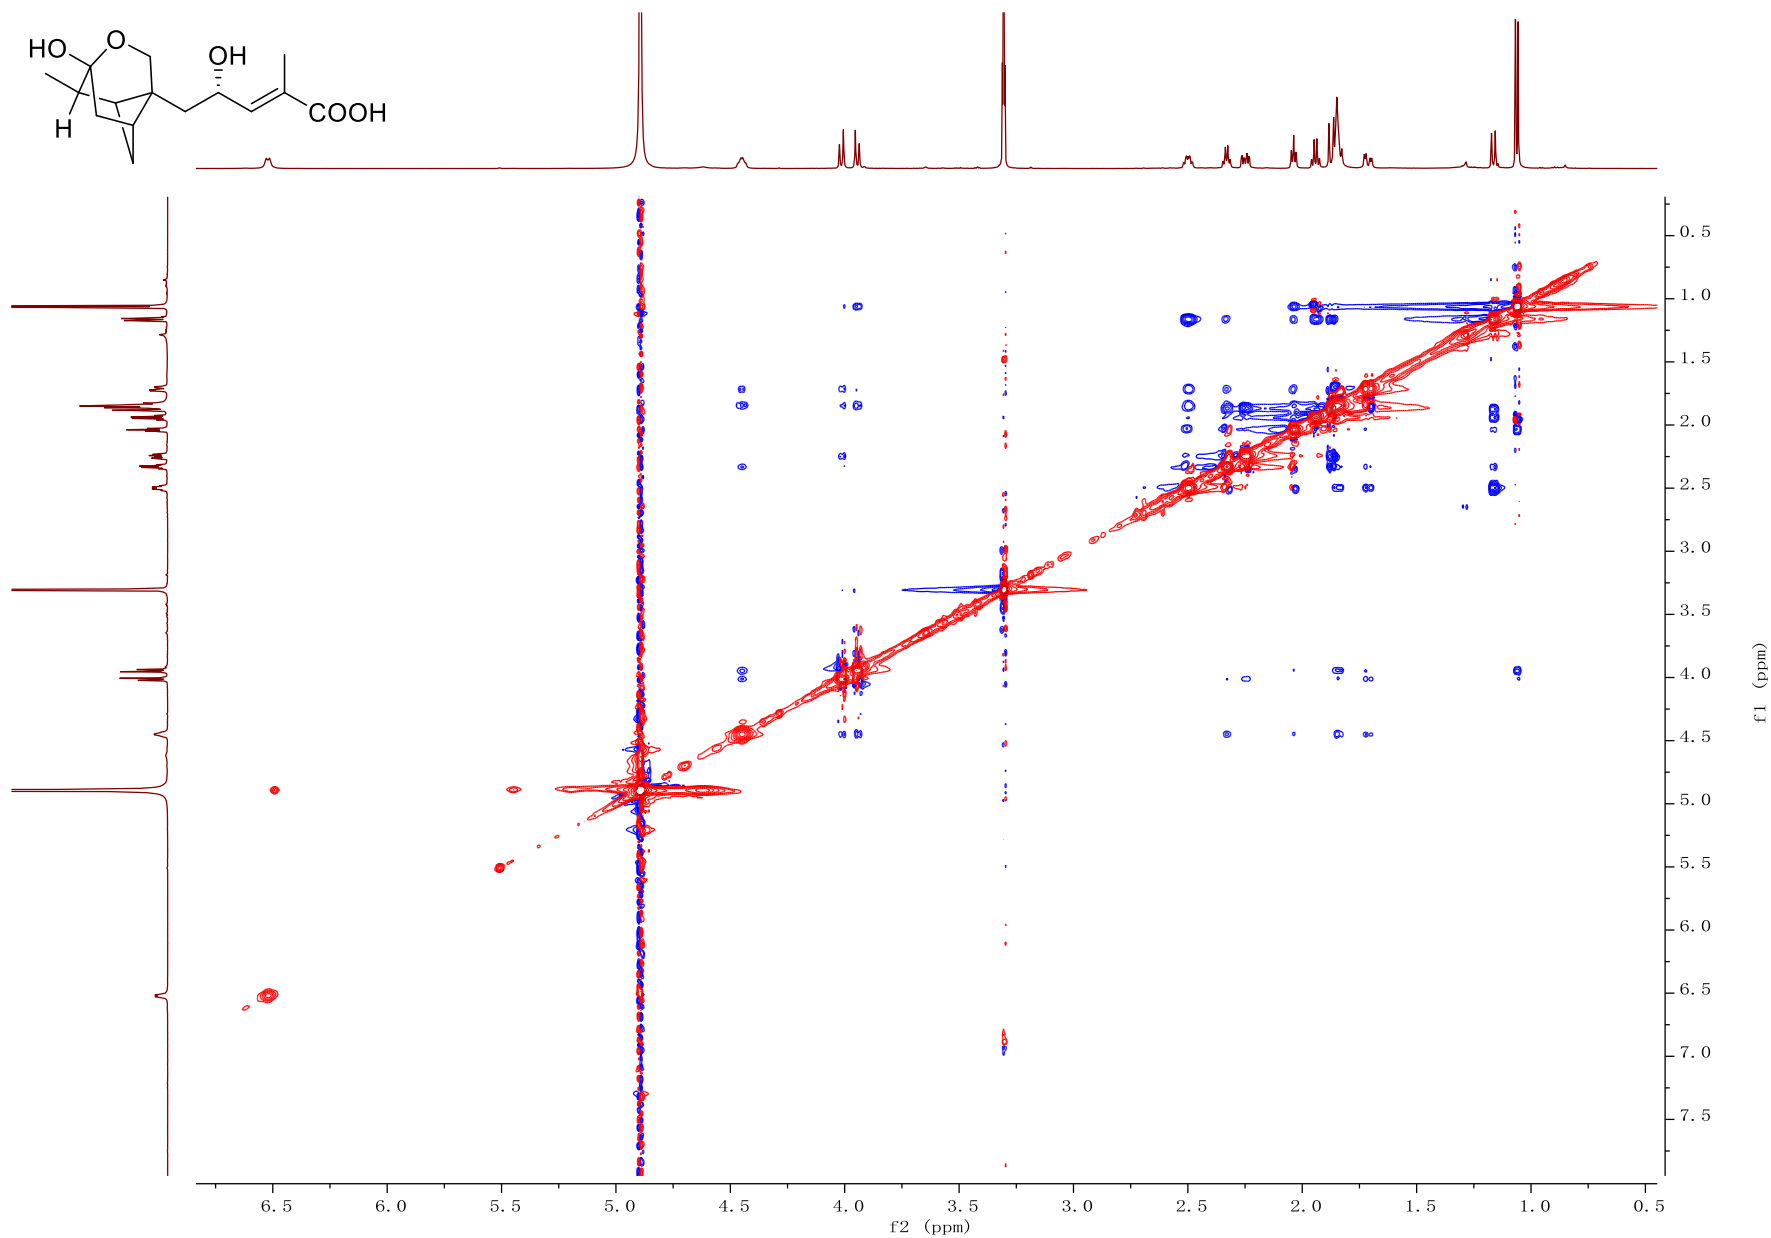



**Figure S149.** HR-ESIMS of compound **18**

T: FTMS + p ESI Full lock ms [150.0000-600.0000]

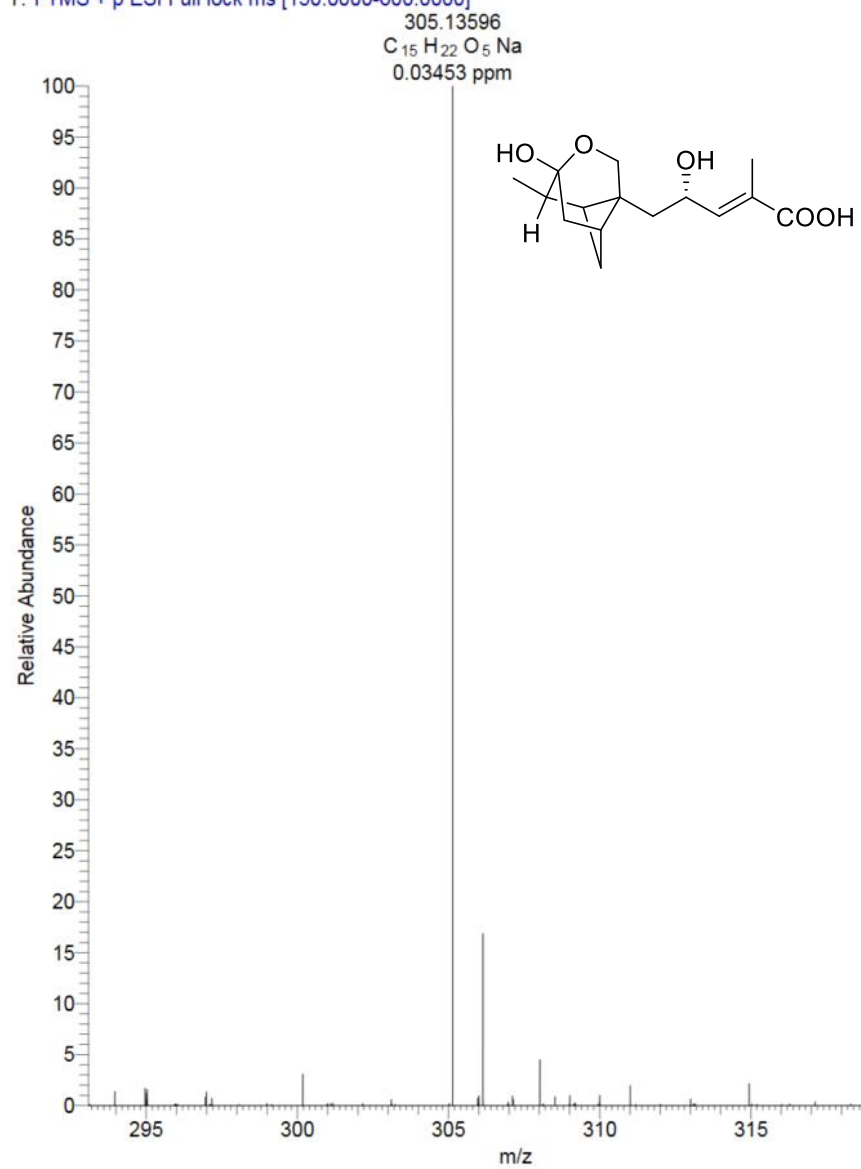

## Section S26. NMR and MS spectra for **19**

**Figure S150.**  $^1\text{H}$  NMR of compound **19** in  $\text{CD}_3\text{OD}$

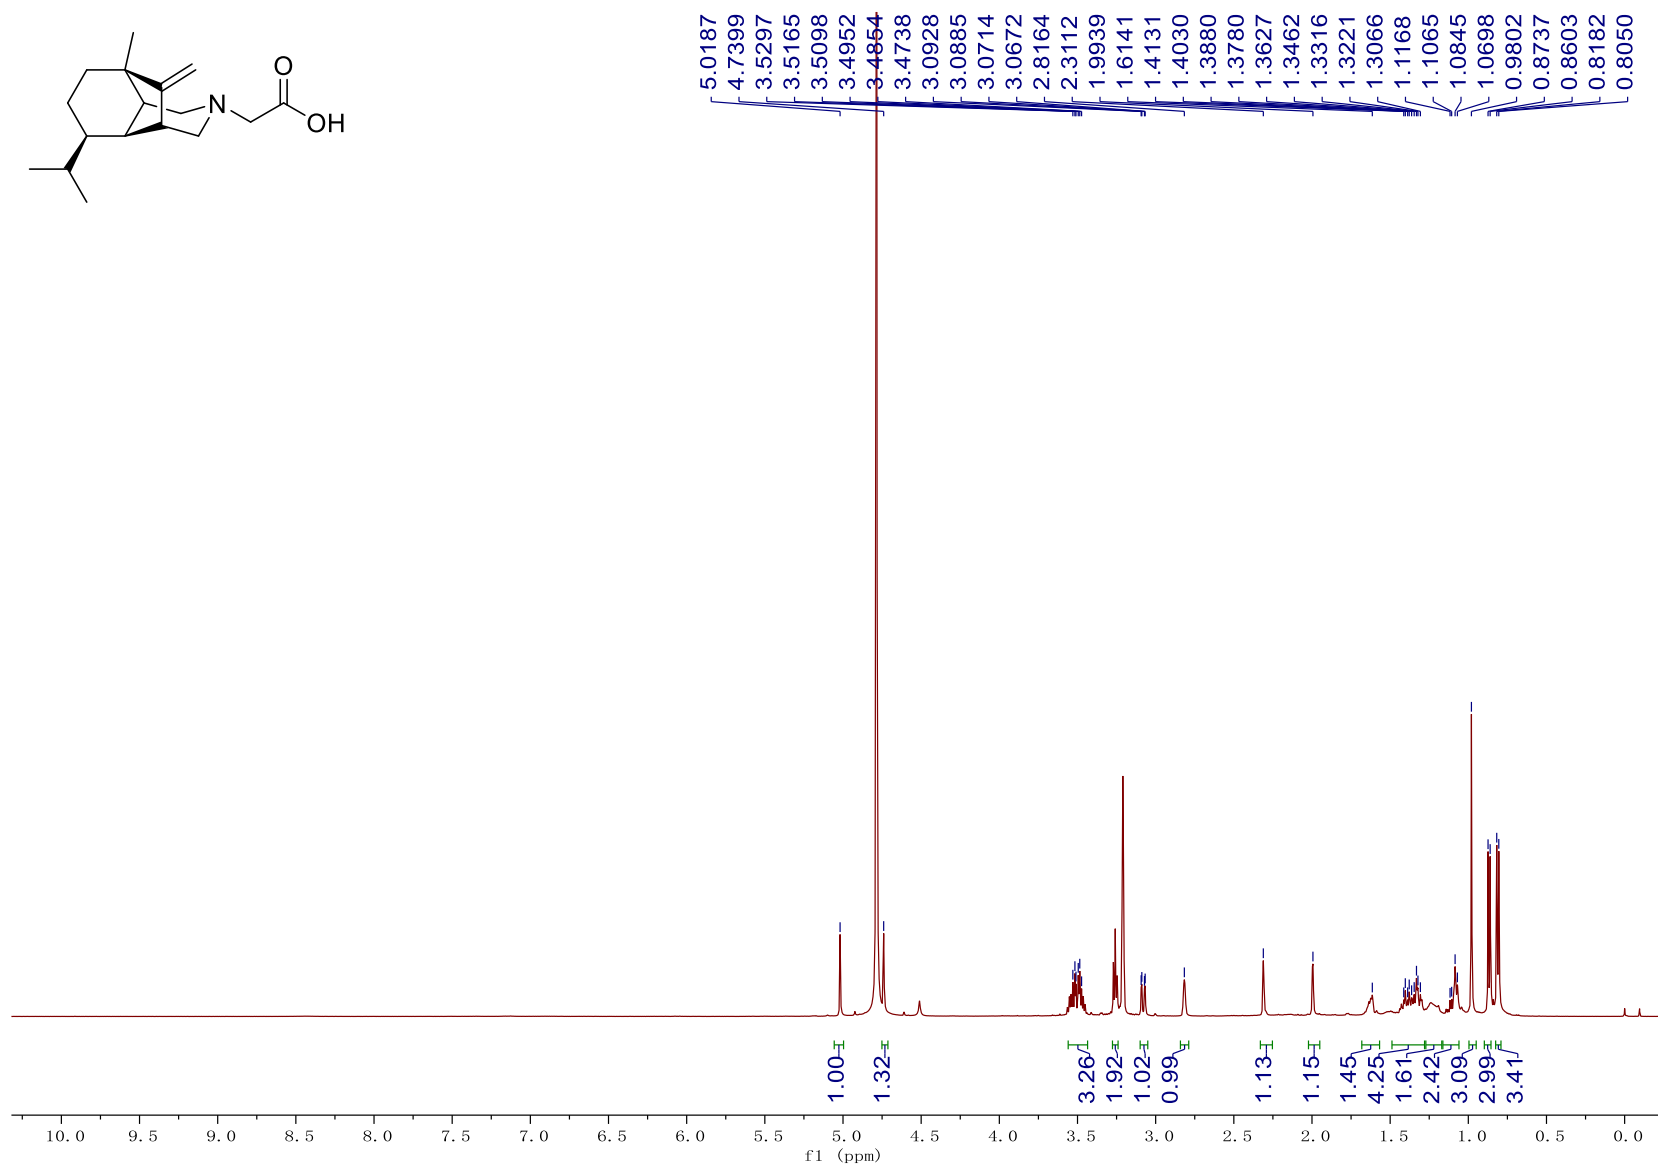

**Figure S151.**  $^{13}\text{C}$  NMR and DEPT of compound **19** in  $\text{CD}_3\text{OD}$

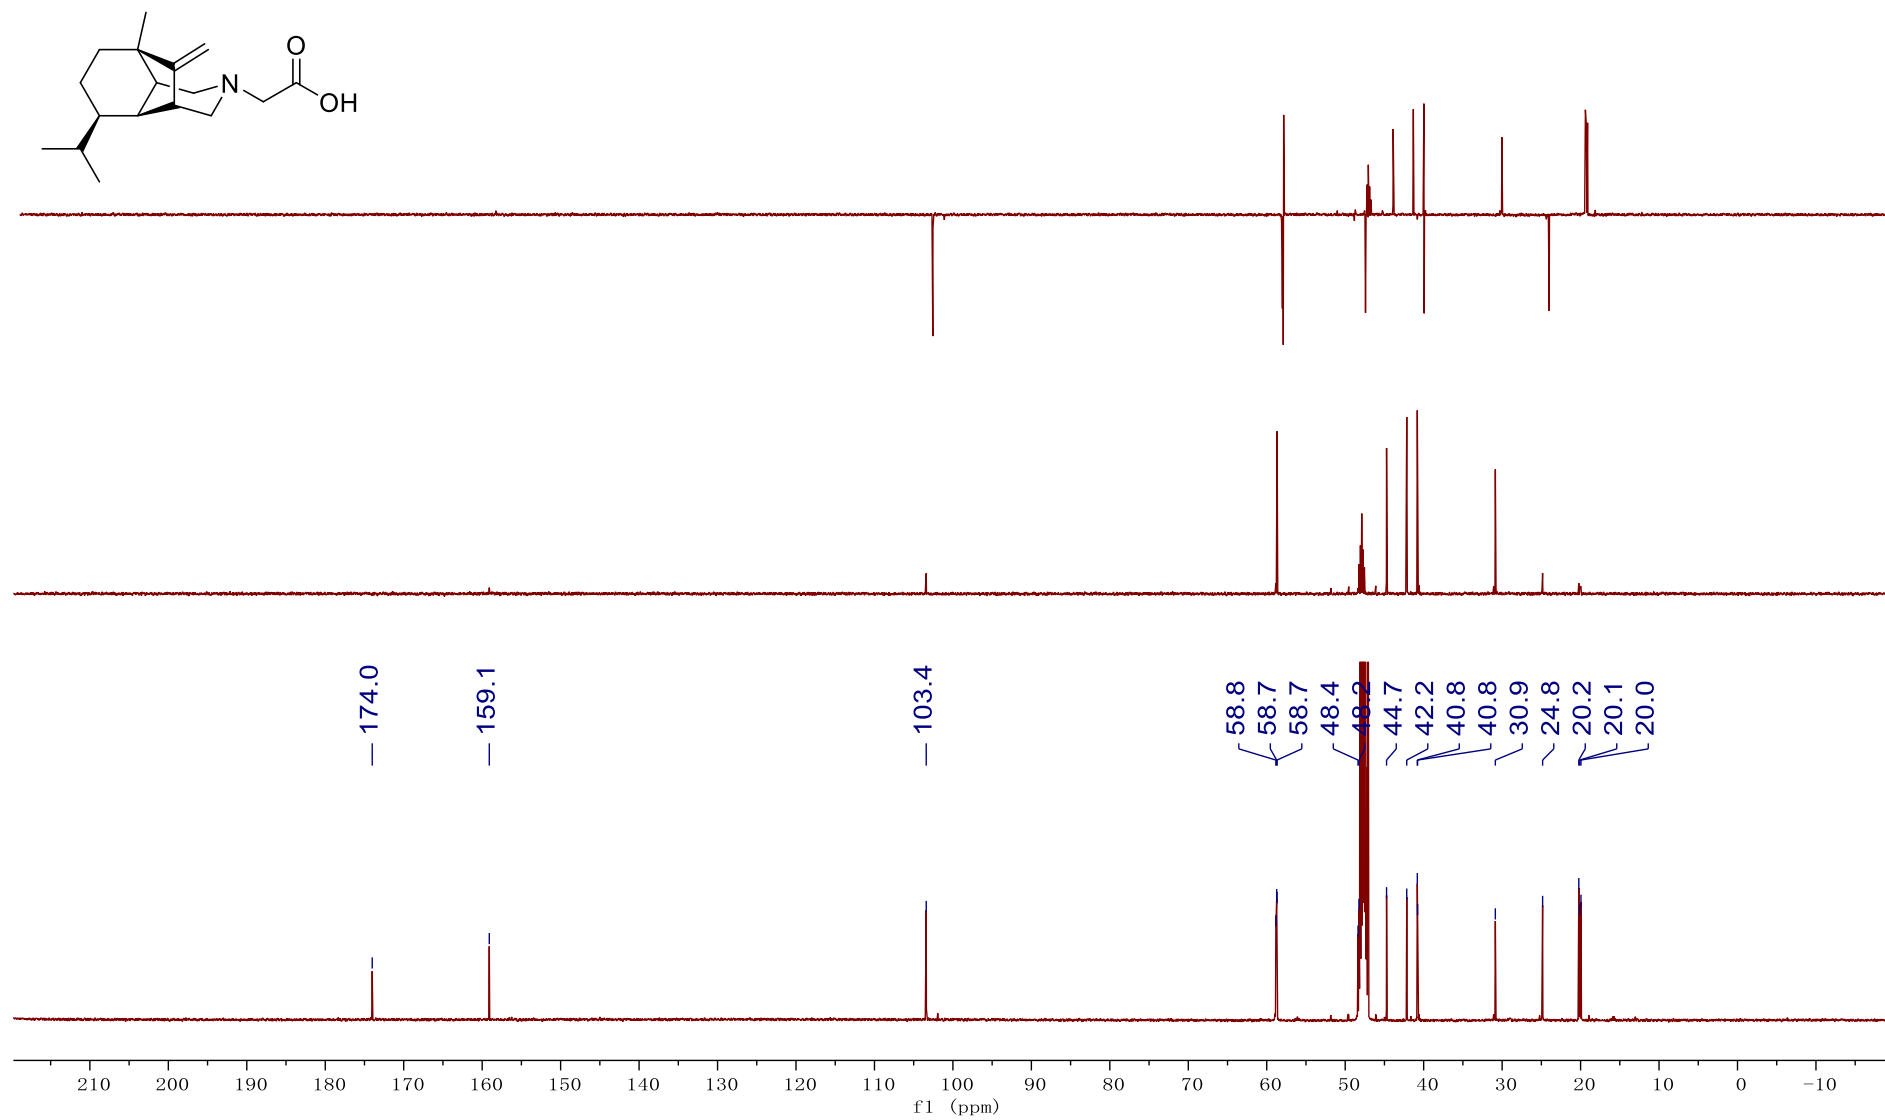

**Figure S152.** HSQC of compound **19** in CD<sub>3</sub>OD

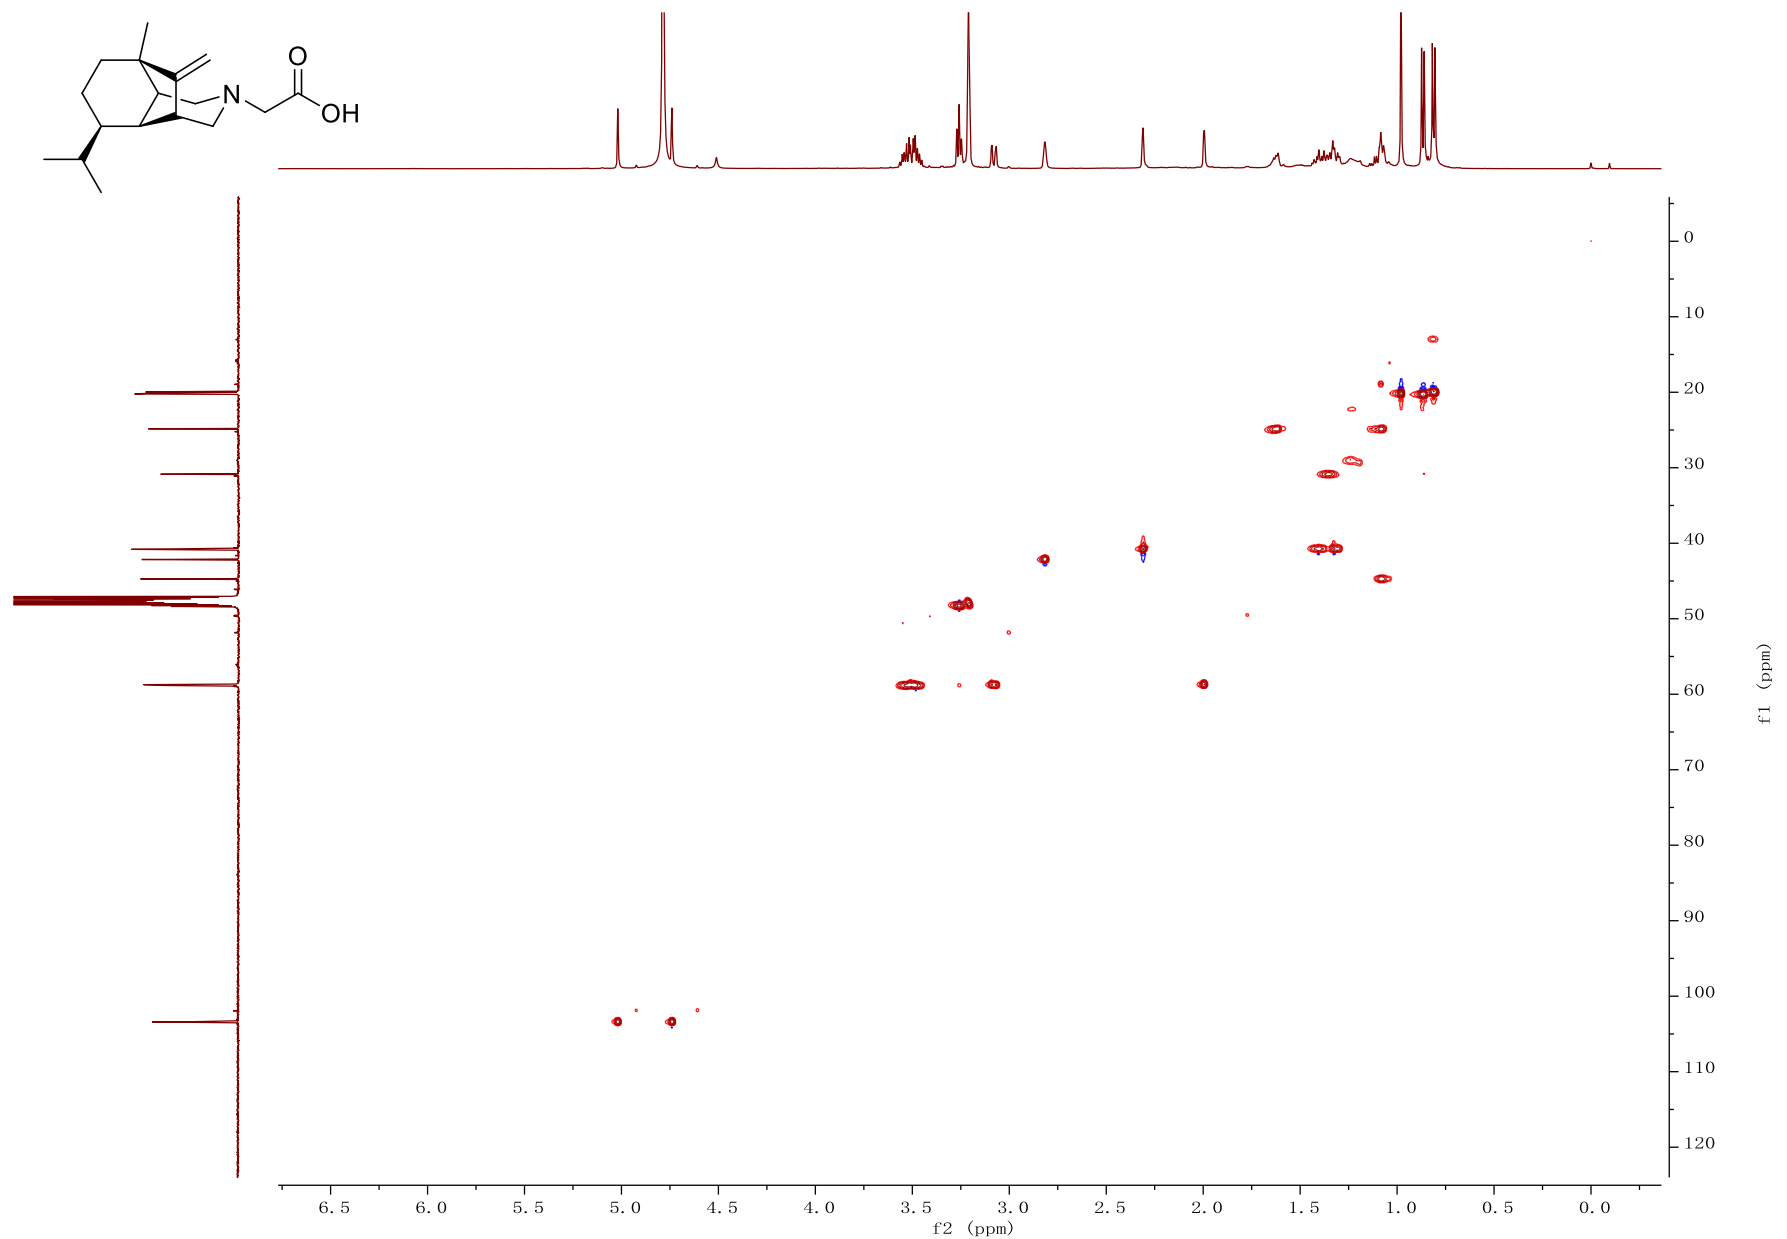

**Figure S153.** HMBC of compound **19** in CD<sub>3</sub>OD

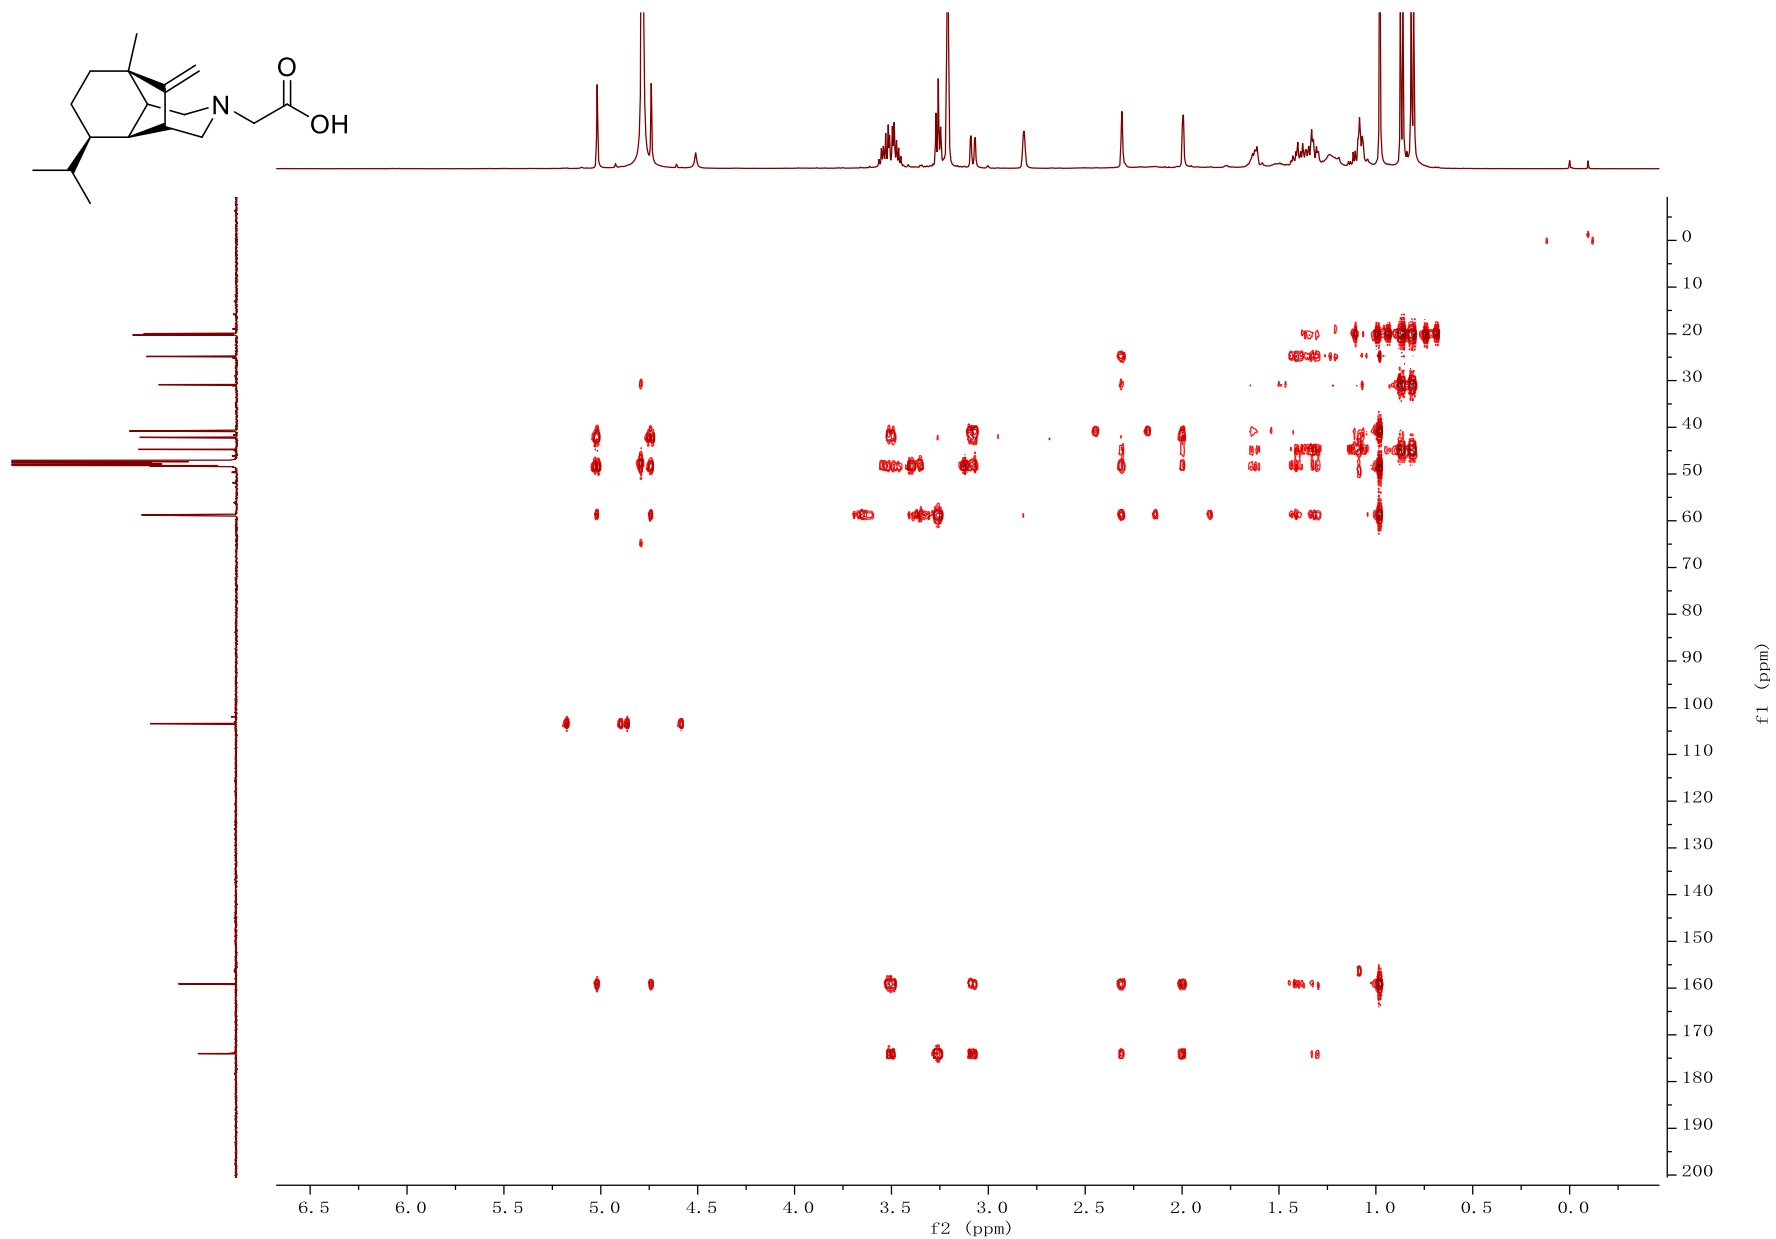

**Figure S154.**  $^1\text{H}$ - $^1\text{H}$  COSY of compound **19** in  $\text{CD}_3\text{OD}$

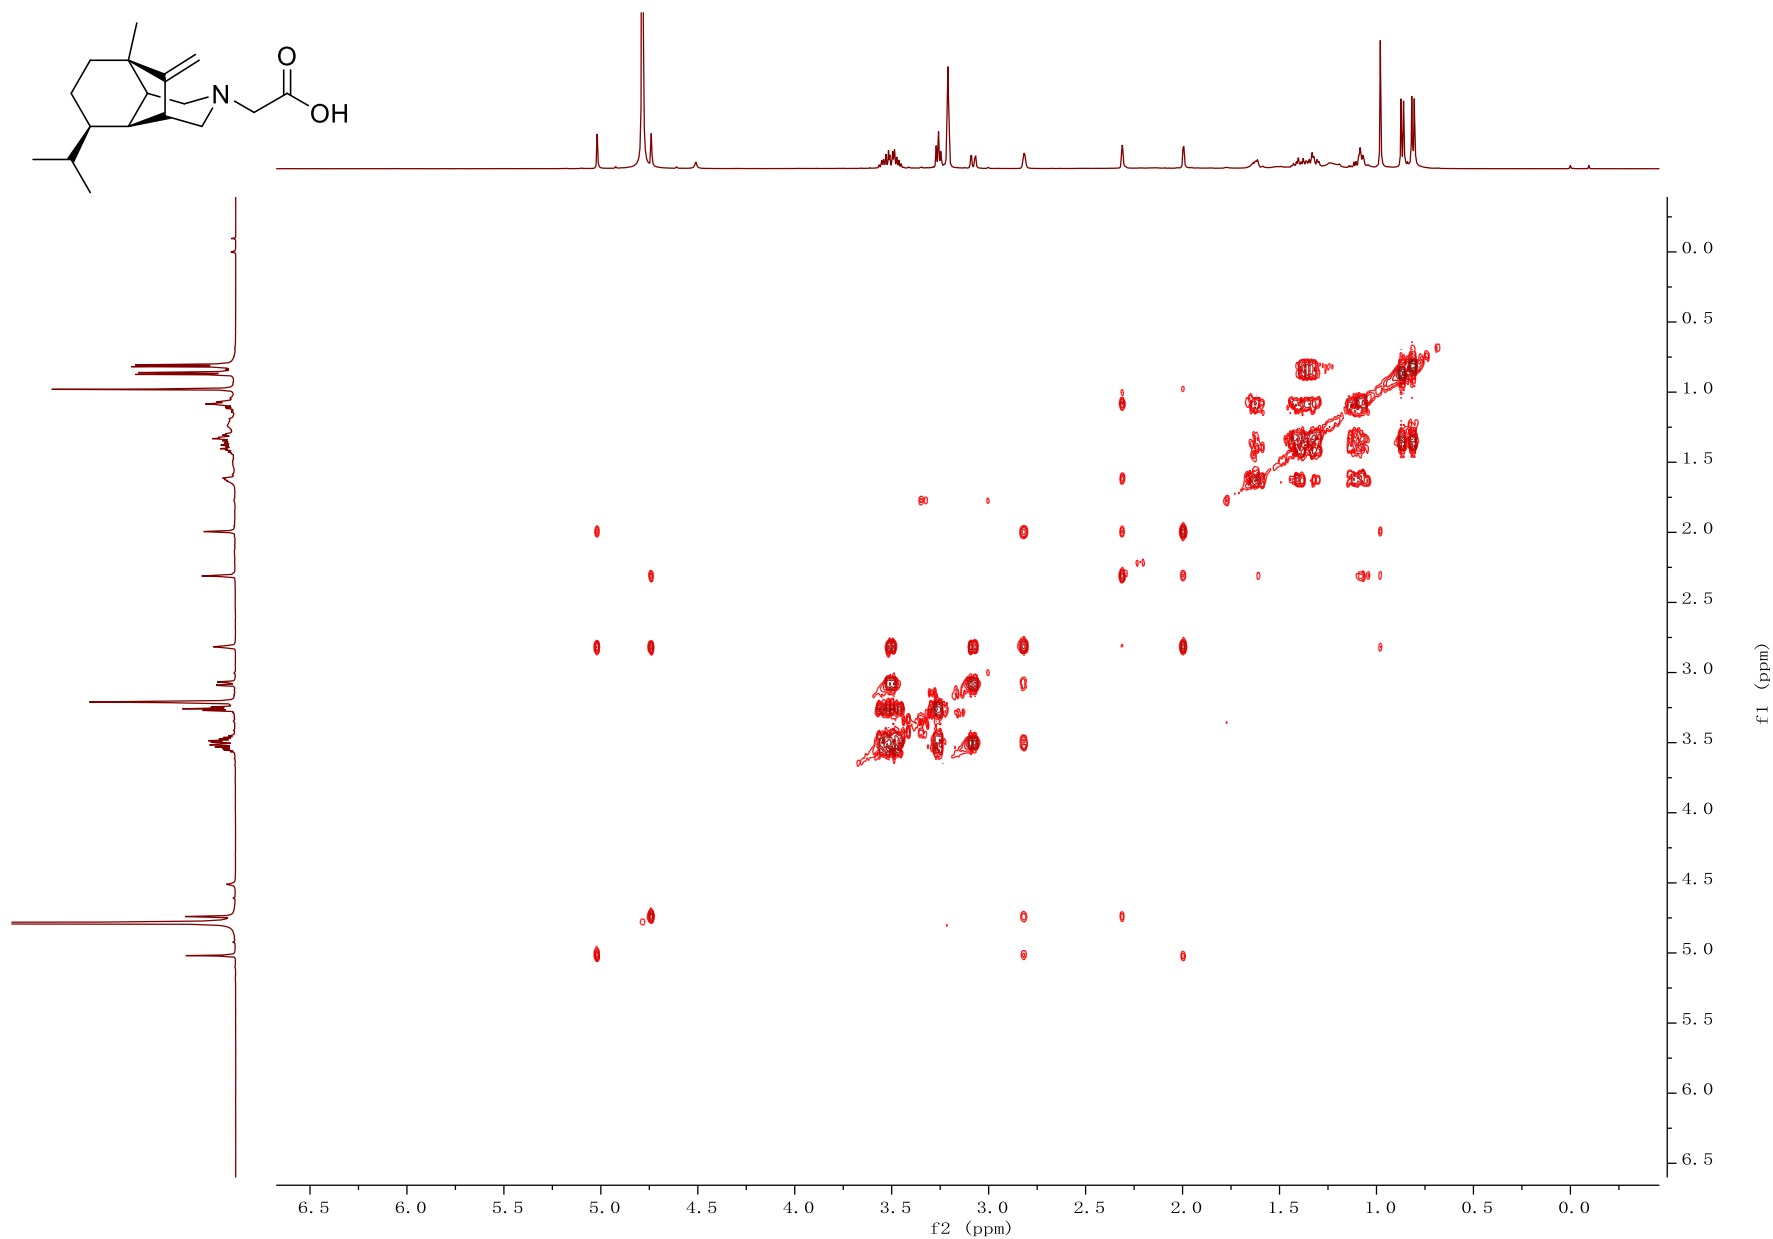

**Figure S155.** ROESY of compound **19** in CD<sub>3</sub>OD

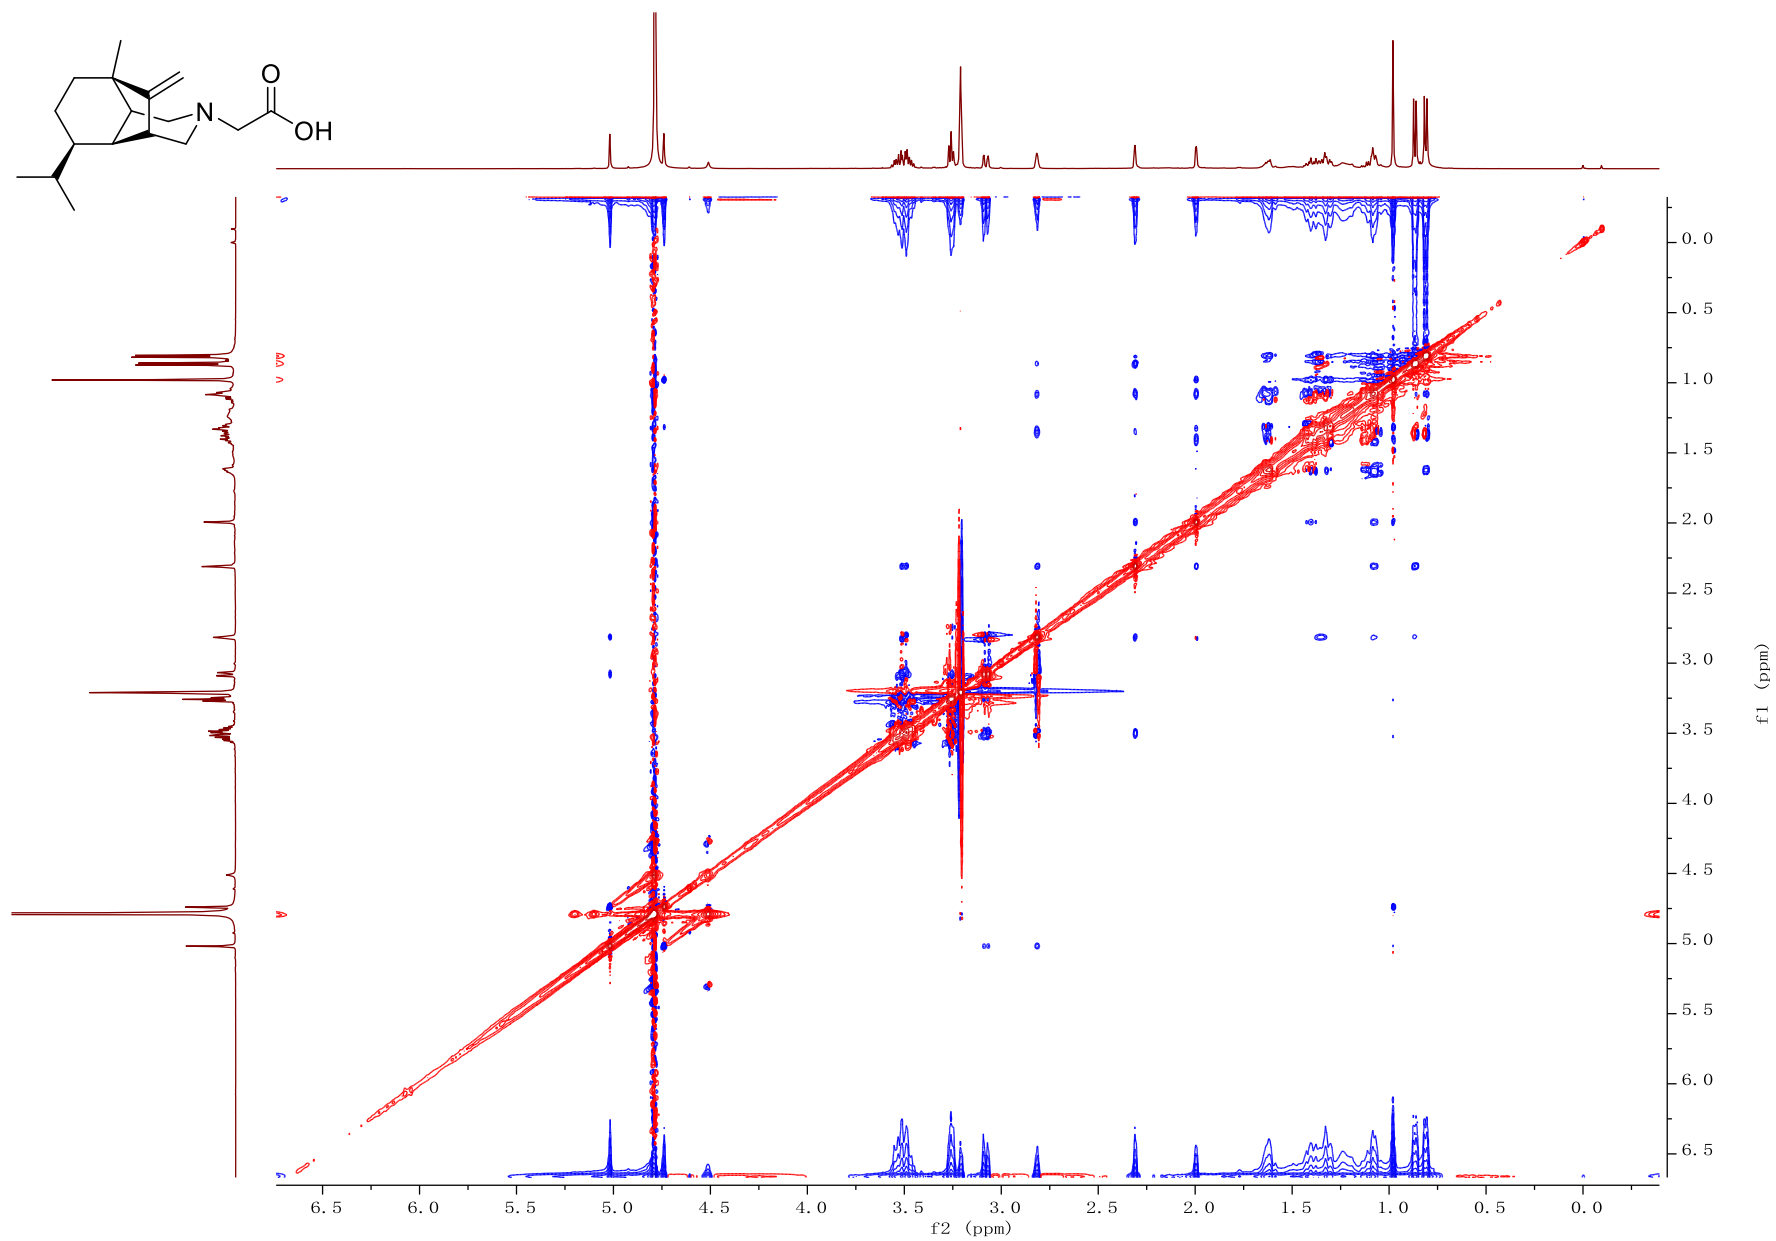

**Figure S156.** HR-ESIMS of compound **19**

FTMS + p ESI Full lock ms [150.0000-1100.0000]

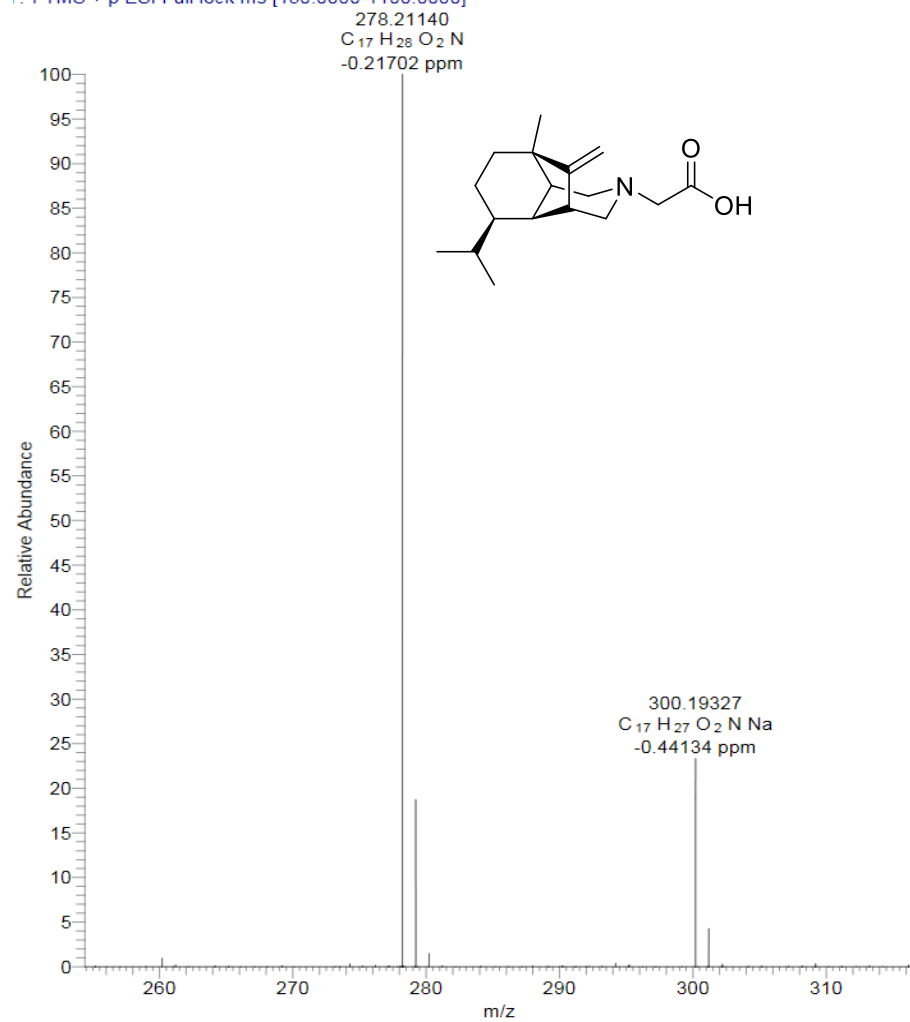

Supplement: s1 [file s1]
