# Supplementary material for: Immunosuppressive Sesquiterpenoids from the Edible Mushroom Craterellus odoratus
Source: J Fungi (Basel). 2021 Dec 8;7(12):1052. doi: 10.3390/jof7121052 (PMC8707212; doi:10.3390/jof7121052)
Supplement: Supplementary file 1 [file jof-07-01052-s001.zip]

Archive with 5 entries (5 files):
- compound 2_0m.cif
- compound 3_0m.cif
- compound 4_0m.cif
- compound 5_0m.cif
- Supporting information.pdf
