# Supplementary material for: Immunosuppressive Sesquiterpenoids from the Edible Mushroom Craterellus odoratus
Source: J Fungi (Basel). 2021 Dec 8;7(12):1052. doi: 10.3390/jof7121052 (PMC8707212; doi:10.3390/jof7121052)
Supplement: Supplementary file 1 [file jof-07-01052-s001.zip › compound 2_0m.cif]

data_global
_audit_creation_method                  'APEX3 v2018.1-0'

_publ_requested_journal                 ?

_publ_contact_author_name               ?
_publ_contact_author_address            
;
;
_publ_contact_author_email              ?
_publ_contact_author_fax                ?
_publ_contact_author_phone              ?

_publ_section_title                     
;
;
_publ_section_abstract                  
;
;
_publ_section_references                
;
;
_publ_section_comment                   
;
;

data_ldlb37
_chemical_name_systematic               ?
_chemical_name_common                   ?
_chemical_formula_moiety                'C15 H22 O4, H2 O'
_chemical_formula_sum                   'C15 H24 O5'
_chemical_formula_iupac                 ?
_chemical_formula_weight                284.34
_chemical_absolute_configuration        ad

_chemical_melting_point                 ?

_space_group_crystal_system             orthorhombic
_space_group_name_H-M_alt               'P 21 21 21'
_space_group_name_Hall                  'P 2ac 2ab'
loop_
    _space_group_symop_operation_xyz
    'x, y, z'
    'x+1/2, -y+1/2, -z'
    '-x, y+1/2, -z+1/2'
    '-x+1/2, -y, z+1/2'

_cell_length_a                          8.6658(3)
_cell_length_b                          10.0982(4)
_cell_length_c                          17.1595(6)
_cell_angle_alpha                       90
_cell_angle_beta                        90
_cell_angle_gamma                       90
_cell_volume                            1501.61(9)
_cell_formula_units_Z                   4
_cell_measurement_reflns_used           9852
_cell_measurement_theta_min             5.0820
_cell_measurement_theta_max             72.4002
_cell_measurement_temperature           100.(2)

_exptl_crystal_description              block
_exptl_crystal_colour                   'clear light colourless'
_exptl_crystal_size_max                 0.450
_exptl_crystal_size_mid                 0.380
_exptl_crystal_size_min                 0.250
_exptl_crystal_density_diffrn           1.258
_exptl_crystal_density_meas             ?
_exptl_crystal_density_method           'not measured'
_exptl_crystal_F_000                    616

_exptl_absorpt_coefficient_mu           0.768
_exptl_absorpt_correction_type          Multi-Scan
_exptl_absorpt_process_details          
;
SADABS-2016/2 - Bruker AXS area detector scaling and absorption correction
;
_exptl_absorpt_correction_T_min         0.67
_exptl_absorpt_correction_T_max         0.83

_exptl_special_details                  
;
; 

_diffrn_ambient_temperature             100.(2)

_diffrn_source                          'Ius Diamond'
_diffrn_source_type                     Microfocus

_diffrn_radiation_type                  'Cu K\a'
_diffrn_radiation_wavelength            1.54178
_diffrn_radiation_monochromator         'Helixos MX multilayer Optic'

_diffrn_measurement_device_type         'Bruker D8 QUEST PHOTON II'
_diffrn_measurement_method              ?

_diffrn_detector_area_resol_mean        7.3910

_diffrn_reflns_number                   12029
_diffrn_reflns_av_R_equivalents         0.0391
_diffrn_reflns_av_unetI/netI            0.0305
_diffrn_reflns_theta_min                5.08
_diffrn_reflns_theta_max                72.39
_diffrn_reflns_theta_full               72.39
_diffrn_measured_fraction_theta_max     0.997
_diffrn_measured_fraction_theta_full    0.997
_diffrn_reflns_limit_h_min              -10
_diffrn_reflns_limit_h_max              10
_diffrn_reflns_limit_k_min              -12
_diffrn_reflns_limit_k_max              12
_diffrn_reflns_limit_l_min              -20
_diffrn_reflns_limit_l_max              21

_refine_special_details                 
;
;

_reflns_number_total                    2967
_reflns_number_gt                       2874
_reflns_threshold_expression            'I > 2\s(I)'

_refine_ls_structure_factor_coef        Fsqd
_refine_ls_matrix_type                  full
_refine_ls_R_factor_all                 0.0325
_refine_ls_R_factor_gt                  0.0314
_refine_ls_wR_factor_gt                 0.0802
_refine_ls_wR_factor_ref                0.0813
_refine_ls_goodness_of_fit_ref          1.049
_refine_ls_restrained_S_all             1.049
_refine_ls_number_reflns                2967
_refine_ls_number_parameters            187
_refine_ls_number_restraints            0
_refine_ls_number_constraints           ?
_refine_ls_hydrogen_treatment           mixed
_refine_ls_weighting_scheme             calc
_refine_ls_weighting_details            
    'w=1/[\s^2^(Fo^2^)+(0.0441P)^2^+0.2814P] where P=(Fo^2^+2Fc^2^)/3'

_atom_sites_solution_hydrogens          mixed
_atom_sites_solution_primary            ?
_atom_sites_solution_secondary          ?

_refine_ls_shift/su_max                 0.000
_refine_ls_shift/su_mean                0.000
_refine_diff_density_max                0.218
_refine_diff_density_min                -0.174
_refine_ls_extinction_method            none
_refine_ls_extinction_coef              ?
_refine_ls_abs_structure_details        
;

Flack x determined using 1186 quotients [(I+)-(I-)]/[(I+)+(I-)]
(Parsons, Flack and Wagner, Acta Cryst. B69 (2013) 249-259).
;
_refine_ls_abs_structure_Flack          0.06(7)

loop_
    _atom_type_symbol
    _atom_type_description
    _atom_type_scat_dispersion_real
    _atom_type_scat_dispersion_imag
    _atom_type_scat_source
    C C 0.0181 0.0091 'International Tables Vol C Tables 4.2.6.8 and 6.1.1.4'
    H H 0.0000 0.0000 'International Tables Vol C Tables 4.2.6.8 and 6.1.1.4'
    O O 0.0492 0.0322 'International Tables Vol C Tables 4.2.6.8 and 6.1.1.4'

_computing_data_collection              'Bruker Instrument Service vV6.2.9'
_computing_cell_refinement              'SAINT V8.38A (Bruker AXS Inc., 2017)'
_computing_data_reduction               'SAINT V8.38A (Bruker AXS Inc., 2017)'
_computing_structure_solution           'SHELXT 2014/5 (Sheldrick, 2014)'
_computing_structure_refinement         'SHELXL-2017/1 (Sheldrick, 2017)'
_computing_molecular_graphics           'shelXle (C.B. Huebschle, rev 882)'
_computing_publication_material         ?

loop_
    _atom_site_type_symbol
    _atom_site_label
    _atom_site_fract_x
    _atom_site_fract_y
    _atom_site_fract_z
    _atom_site_U_iso_or_equiv
    _atom_site_adp_type
    _atom_site_calc_flag
    _atom_site_refinement_flags_adp
    _atom_site_refinement_flags_occupancy
    _atom_site_refinement_flags_posn
    _atom_site_occupancy
    _atom_site_disorder_assembly
    _atom_site_disorder_group
    O O1 0.6262(3) 0.22554(15) 0.60480(9) 0.0449(5) Uani d . . . 1 . .
    O O2 0.55850(18) 0.42817(13) 0.64048(8) 0.0256(3) Uani d . . . 1 . .
    H H21 0.565(3) 0.3976(15) 0.6817(16) 0.038 Uiso calc U . R 1 . .
    O O3 0.44929(15) 0.66464(12) 0.40497(7) 0.0178(3) Uani d . . . 1 . .
    O O4 0.93024(16) 0.64176(13) 0.28663(7) 0.0202(3) Uani d . . . 1 . .
    H H22 0.997(3) 0.6083(15) 0.3149(13) 0.03 Uiso calc U . R 1 . .
    C C1 0.6784(2) 0.99753(18) 0.30166(11) 0.0211(4) Uani d . . . 1 . .
    H H1 0.780112 1.028511 0.282698 0.025 Uiso calc U . R 1 . .
    H H10 0.60826 1.074414 0.306708 0.025 Uiso calc U . R 1 . .
    C C2 0.6940(2) 0.92318(17) 0.37930(10) 0.0173(4) Uani d . . . 1 . .
    H H18 0.766347 0.964909 0.41748 0.021 Uiso calc U . R 1 . .
    C C3 0.7392(2) 0.78060(17) 0.35366(10) 0.0154(3) Uani d . . . 1 . .
    C C4 0.7322(2) 0.68155(17) 0.42223(10) 0.0161(4) Uani d . . . 1 . .
    H H17 0.826625 0.626372 0.422015 0.019 Uiso calc U . R 1 . .
    H H16 0.729558 0.731229 0.471947 0.019 Uiso calc U . R 1 . .
    C C5 0.5900(2) 0.59127(17) 0.41737(10) 0.0167(3) Uani d . . . 1 . .
    H H20 0.604194 0.526586 0.373834 0.02 Uiso calc U . R 1 . .
    O O5 1.13890(16) 0.54977(13) 0.39314(8) 0.0224(3) Uani d . . . 1 . .
    H H23 1.233694 0.58147 0.397475 0.034 Uiso d U . R 1 . .
    H H24 1.140794 0.46547 0.399875 0.034 Uiso d U . R 1 . .
    C C6 0.5720(2) 0.51736(17) 0.49232(10) 0.0172(4) Uani d . . . 1 . .
    H H5 0.527038 0.564881 0.534356 0.021 Uiso calc U . R 1 . .
    C C7 0.6120(2) 0.39232(18) 0.50681(11) 0.0226(4) Uani d . . . 1 . .
    C C8 0.5991(2) 0.34013(17) 0.58832(11) 0.0216(4) Uani d . . . 1 . .
    C C9 0.6741(5) 0.2955(3) 0.44817(13) 0.0570(9) Uani d . . . 1 . .
    H H4 0.60977 0.215721 0.447982 0.086 Uiso calc U . R 1 . .
    H H3 0.780262 0.271757 0.462018 0.086 Uiso calc U . R 1 . .
    H H2 0.672801 0.335995 0.396264 0.086 Uiso calc U . R 1 . .
    C C10 0.4672(2) 0.78508(17) 0.35860(10) 0.0167(4) Uani d . . . 1 . .
    C C11 0.3071(2) 0.81193(18) 0.32642(11) 0.0211(4) Uani d . . . 1 . .
    H H6 0.277529 0.740335 0.29087 0.032 Uiso calc U . R 1 . .
    H H8 0.307298 0.896249 0.298148 0.032 Uiso calc U . R 1 . .
    H H7 0.232952 0.816548 0.36948 0.032 Uiso calc U . R 1 . .
    C C12 0.5295(2) 0.89991(18) 0.41040(10) 0.0186(4) Uani d . . . 1 . .
    H H19 0.465403 0.980432 0.40451 0.022 Uiso calc U . R 1 . .
    H H9 0.531469 0.873922 0.466021 0.022 Uiso calc U . R 1 . .
    C C13 0.6095(2) 0.89070(19) 0.24658(11) 0.0210(4) Uani d . . . 1 . .
    H H12 0.50661 0.917746 0.227223 0.025 Uiso calc U . R 1 . .
    H H11 0.678276 0.874473 0.201506 0.025 Uiso calc U . R 1 . .
    C C14 0.5977(2) 0.76664(17) 0.29874(10) 0.0160(3) Uani d . . . 1 . .
    H H13 0.593404 0.681086 0.26947 0.019 Uiso calc U . R 1 . .
    C C15 0.8960(2) 0.77387(17) 0.31360(11) 0.0180(4) Uani d . . . 1 . .
    H H14 0.897045 0.835529 0.268753 0.022 Uiso calc U . R 1 . .
    H H15 0.977076 0.802542 0.350597 0.022 Uiso calc U . R 1 . .

loop_
    _atom_site_aniso_label
    _atom_site_aniso_U_11
    _atom_site_aniso_U_22
    _atom_site_aniso_U_33
    _atom_site_aniso_U_12
    _atom_site_aniso_U_13
    _atom_site_aniso_U_23
    O1 0.0905(15) 0.0181(7) 0.0261(7) 0.0130(8) -0.0078(9) 0.0027(6)
    O2 0.0399(8) 0.0208(6) 0.0160(6) 0.0074(6) 0.0037(6) 0.0054(5)
    O3 0.0165(6) 0.0175(6) 0.0192(6) -0.0006(5) 0.0002(5) 0.0037(5)
    O4 0.0226(7) 0.0208(6) 0.0173(6) 0.0040(5) -0.0001(5) -0.0038(5)
    C1 0.0222(9) 0.0178(8) 0.0234(9) -0.0014(7) 0.0009(7) 0.0039(7)
    C2 0.0189(9) 0.0157(8) 0.0173(8) 0.0011(7) -0.0020(6) -0.0020(6)
    C3 0.0181(8) 0.0153(7) 0.0129(7) -0.0008(7) -0.0012(7) -0.0009(6)
    C4 0.0165(8) 0.0190(8) 0.0129(8) 0.0011(7) -0.0015(6) 0.0004(6)
    C5 0.0185(8) 0.0158(7) 0.0160(8) 0.0011(7) -0.0006(6) -0.0009(7)
    O5 0.0228(7) 0.0175(6) 0.0268(7) -0.0001(5) -0.0006(5) 0.0029(5)
    C6 0.0181(9) 0.0179(8) 0.0155(8) -0.0005(7) 0.0006(7) -0.0012(6)
    C7 0.0302(10) 0.0191(8) 0.0186(9) 0.0040(8) -0.0005(7) 0.0002(7)
    C8 0.0283(9) 0.0154(8) 0.0210(9) 0.0006(7) -0.0040(7) 0.0008(7)
    C9 0.114(3) 0.0332(12) 0.0240(11) 0.0354(15) 0.0048(14) -0.0009(9)
    C10 0.0179(8) 0.0153(8) 0.0168(8) -0.0012(7) -0.0002(7) 0.0027(7)
    C11 0.0166(9) 0.0209(9) 0.0257(9) 0.0009(7) -0.0022(7) 0.0030(7)
    C12 0.0189(8) 0.0183(8) 0.0185(8) 0.0014(7) 0.0000(7) -0.0017(7)
    C13 0.0213(9) 0.0245(9) 0.0171(8) -0.0006(7) -0.0018(7) 0.0060(7)
    C14 0.0175(8) 0.0164(8) 0.0142(7) 0.0002(7) -0.0019(7) -0.0002(6)
    C15 0.0171(8) 0.0176(8) 0.0193(8) -0.0003(7) 0.0012(7) -0.0019(6)

_geom_special_details                   
;

All esds (except the esd in the dihedral angle between two l.s. planes)
are estimated using the full covariance matrix.  The cell esds are taken
into account individually in the estimation of esds in distances, angles
and torsion angles; correlations between esds in cell parameters are only
used when they are defined by crystal symmetry.  An approximate (isotropic)
treatment of cell esds is used for estimating esds involving l.s. planes.
;

loop_
    _geom_bond_atom_site_label_1
    _geom_bond_atom_site_label_2
    _geom_bond_site_symmetry_2
    _geom_bond_distance
    _geom_bond_publ_flag
    O1 C8 . 1.214(2) ?
    O2 C8 . 1.310(2) ?
    O2 H21 . 0.77(3) ?
    O3 C5 . 1.442(2) ?
    O3 C10 . 1.462(2) ?
    O4 C15 . 1.443(2) ?
    O4 H22 . 0.82(3) ?
    C1 C2 . 1.535(2) ?
    C1 C13 . 1.554(3) ?
    C1 H1 . 0.99 ?
    C1 H10 . 0.99 ?
    C2 C12 . 1.540(2) ?
    C2 C3 . 1.556(2) ?
    C2 H18 . 1.0 ?
    C3 C15 . 1.525(2) ?
    C3 C4 . 1.545(2) ?
    C3 C14 . 1.553(2) ?
    C4 C5 . 1.535(2) ?
    C4 H17 . 0.99 ?
    C4 H16 . 0.99 ?
    C5 C6 . 1.495(2) ?
    C5 H20 . 1.0 ?
    O5 H23 . 0.8847 ?
    O5 H24 . 0.8592 ?
    C6 C7 . 1.333(3) ?
    C6 H5 . 0.95 ?
    C7 C8 . 1.499(3) ?
    C7 C9 . 1.502(3) ?
    C9 H4 . 0.98 ?
    C9 H3 . 0.98 ?
    C9 H2 . 0.98 ?
    C10 C11 . 1.518(2) ?
    C10 C14 . 1.539(2) ?
    C10 C12 . 1.558(2) ?
    C11 H6 . 0.98 ?
    C11 H8 . 0.98 ?
    C11 H7 . 0.98 ?
    C12 H19 . 0.99 ?
    C12 H9 . 0.99 ?
    C13 C14 . 1.543(2) ?
    C13 H12 . 0.99 ?
    C13 H11 . 0.99 ?
    C14 H13 . 1.0 ?
    C15 H14 . 0.99 ?
    C15 H15 . 0.99 ?

loop_
    _geom_angle_atom_site_label_1
    _geom_angle_atom_site_label_2
    _geom_angle_atom_site_label_3
    _geom_angle_site_symmetry_1
    _geom_angle_site_symmetry_3
    _geom_angle
    _geom_angle_publ_flag
    C8 O2 H21 . . 109.5 ?
    C5 O3 C10 . . 114.71(13) ?
    C15 O4 H22 . . 109.5 ?
    C2 C1 C13 . . 102.83(14) ?
    C2 C1 H1 . . 111.2 ?
    C13 C1 H1 . . 111.2 ?
    C2 C1 H10 . . 111.2 ?
    C13 C1 H10 . . 111.2 ?
    H1 C1 H10 . . 109.1 ?
    C1 C2 C12 . . 107.10(14) ?
    C1 C2 C3 . . 103.26(13) ?
    C12 C2 C3 . . 100.94(14) ?
    C1 C2 H18 . . 114.7 ?
    C12 C2 H18 . . 114.7 ?
    C3 C2 H18 . . 114.7 ?
    C15 C3 C4 . . 110.44(14) ?
    C15 C3 C14 . . 115.23(14) ?
    C4 C3 C14 . . 111.86(14) ?
    C15 C3 C2 . . 113.15(14) ?
    C4 C3 C2 . . 111.95(14) ?
    C14 C3 C2 . . 93.26(13) ?
    C5 C4 C3 . . 111.99(14) ?
    C5 C4 H17 . . 109.2 ?
    C3 C4 H17 . . 109.2 ?
    C5 C4 H16 . . 109.2 ?
    C3 C4 H16 . . 109.2 ?
    H17 C4 H16 . . 107.9 ?
    O3 C5 C6 . . 107.18(14) ?
    O3 C5 C4 . . 112.42(14) ?
    C6 C5 C4 . . 109.47(14) ?
    O3 C5 H20 . . 109.2 ?
    C6 C5 H20 . . 109.2 ?
    C4 C5 H20 . . 109.2 ?
    H23 O5 H24 . . 109.2 ?
    C7 C6 C5 . . 127.33(16) ?
    C7 C6 H5 . . 116.3 ?
    C5 C6 H5 . . 116.3 ?
    C6 C7 C8 . . 119.20(17) ?
    C6 C7 C9 . . 125.77(18) ?
    C8 C7 C9 . . 115.02(16) ?
    O1 C8 O2 . . 122.67(18) ?
    O1 C8 C7 . . 122.55(17) ?
    O2 C8 C7 . . 114.77(15) ?
    C7 C9 H4 . . 109.5 ?
    C7 C9 H3 . . 109.5 ?
    H4 C9 H3 . . 109.5 ?
    C7 C9 H2 . . 109.5 ?
    H4 C9 H2 . . 109.5 ?
    H3 C9 H2 . . 109.5 ?
    O3 C10 C11 . . 104.45(14) ?
    O3 C10 C14 . . 109.92(14) ?
    C11 C10 C14 . . 116.78(15) ?
    O3 C10 C12 . . 110.22(13) ?
    C11 C10 C12 . . 113.04(15) ?
    C14 C10 C12 . . 102.49(14) ?
    C10 C11 H6 . . 109.5 ?
    C10 C11 H8 . . 109.5 ?
    H6 C11 H8 . . 109.5 ?
    C10 C11 H7 . . 109.5 ?
    H6 C11 H7 . . 109.5 ?
    H8 C11 H7 . . 109.5 ?
    C2 C12 C10 . . 103.69(14) ?
    C2 C12 H19 . . 111.0 ?
    C10 C12 H19 . . 111.0 ?
    C2 C12 H9 . . 111.0 ?
    C10 C12 H9 . . 111.0 ?
    H19 C12 H9 . . 109.0 ?
    C14 C13 C1 . . 103.67(14) ?
    C14 C13 H12 . . 111.0 ?
    C1 C13 H12 . . 111.0 ?
    C14 C13 H11 . . 111.0 ?
    C1 C13 H11 . . 111.0 ?
    H12 C13 H11 . . 109.0 ?
    C10 C14 C13 . . 109.74(14) ?
    C10 C14 C3 . . 99.44(13) ?
    C13 C14 C3 . . 103.05(14) ?
    C10 C14 H13 . . 114.4 ?
    C13 C14 H13 . . 114.4 ?
    C3 C14 H13 . . 114.4 ?
    O4 C15 C3 . . 111.66(14) ?
    O4 C15 H14 . . 109.3 ?
    C3 C15 H14 . . 109.3 ?
    O4 C15 H15 . . 109.3 ?
    C3 C15 H15 . . 109.3 ?
    H14 C15 H15 . . 108.0 ?

loop_
    _geom_torsion_atom_site_label_1
    _geom_torsion_atom_site_label_2
    _geom_torsion_atom_site_label_3
    _geom_torsion_atom_site_label_4
    _geom_torsion_site_symmetry_1
    _geom_torsion_site_symmetry_2
    _geom_torsion_site_symmetry_3
    _geom_torsion_site_symmetry_4
    _geom_torsion
    _geom_torsion_publ_flag
    C13 C1 C2 C12 . . . . -70.16(17) ?
    C13 C1 C2 C3 . . . . 35.89(17) ?
    C1 C2 C3 C15 . . . . 64.78(18) ?
    C12 C2 C3 C15 . . . . 175.47(14) ?
    C1 C2 C3 C4 . . . . -169.63(14) ?
    C12 C2 C3 C4 . . . . -58.94(17) ?
    C1 C2 C3 C14 . . . . -54.48(15) ?
    C12 C2 C3 C14 . . . . 56.21(14) ?
    C15 C3 C4 C5 . . . . -127.92(15) ?
    C14 C3 C4 C5 . . . . 1.9(2) ?
    C2 C3 C4 C5 . . . . 105.02(16) ?
    C10 O3 C5 C6 . . . . 152.70(13) ?
    C10 O3 C5 C4 . . . . 32.36(18) ?
    C3 C4 C5 O3 . . . . -49.69(18) ?
    C3 C4 C5 C6 . . . . -168.69(14) ?
    O3 C5 C6 C7 . . . . 136.9(2) ?
    C4 C5 C6 C7 . . . . -100.9(2) ?
    C5 C6 C7 C8 . . . . 173.88(17) ?
    C5 C6 C7 C9 . . . . -4.7(4) ?
    C6 C7 C8 O1 . . . . 176.2(2) ?
    C9 C7 C8 O1 . . . . -5.1(3) ?
    C6 C7 C8 O2 . . . . -4.7(3) ?
    C9 C7 C8 O2 . . . . 174.0(2) ?
    C5 O3 C10 C11 . . . . 157.68(14) ?
    C5 O3 C10 C14 . . . . 31.65(18) ?
    C5 O3 C10 C12 . . . . -80.60(17) ?
    C1 C2 C12 C10 . . . . 75.59(17) ?
    C3 C2 C12 C10 . . . . -32.10(16) ?
    O3 C10 C12 C2 . . . . 111.36(15) ?
    C11 C10 C12 C2 . . . . -132.17(15) ?
    C14 C10 C12 C2 . . . . -5.61(17) ?
    C2 C1 C13 C14 . . . . -1.41(18) ?
    O3 C10 C14 C13 . . . . 176.52(14) ?
    C11 C10 C14 C13 . . . . 57.83(19) ?
    C12 C10 C14 C13 . . . . -66.29(17) ?
    O3 C10 C14 C3 . . . . -75.84(15) ?
    C11 C10 C14 C3 . . . . 165.46(15) ?
    C12 C10 C14 C3 . . . . 41.34(15) ?
    C1 C13 C14 C10 . . . . 71.68(17) ?
    C1 C13 C14 C3 . . . . -33.52(17) ?
    C15 C3 C14 C10 . . . . -177.35(14) ?
    C4 C3 C14 C10 . . . . 55.41(17) ?
    C2 C3 C14 C10 . . . . -59.82(14) ?
    C15 C3 C14 C13 . . . . -64.40(18) ?
    C4 C3 C14 C13 . . . . 168.36(14) ?
    C2 C3 C14 C13 . . . . 53.13(15) ?
    C4 C3 C15 O4 . . . . 56.95(19) ?
    C14 C3 C15 O4 . . . . -71.00(19) ?
    C2 C3 C15 O4 . . . . -176.66(14) ?

loop_
    _geom_hbond_atom_site_label_D
    _geom_hbond_atom_site_label_H
    _geom_hbond_atom_site_label_A
    _geom_hbond_site_symmetry_A
    _geom_hbond_distance_DH
    _geom_hbond_distance_HA
    _geom_hbond_distance_DA
    _geom_hbond_angle_DHA
    _geom_hbond_publ_flag
    O2 H21 O4 4_665 0.77 1.84 2.6072(18) 168.4 ?
    O4 H22 O5 . 0.82 1.92 2.734(2) 170.8 ?
    O5 H23 O3 1_655 0.88 2.05 2.9363(18) 176.8 ?
    O5 H24 O1 2_556 0.86 1.93 2.783(2) 168.8 ?

_shelx_res_file                         
;

TITL ldlb37_0m_a.res in P2(1)2(1)2(1)
    ldlb37_0m.res
    created by SHELXL-2017/1 at 22:05:54 on 24-Sep-2020
CELL 1.54178 8.6658 10.0982 17.1595 90.000 90.000 90.000
ZERR 4.00 0.0003 0.0004 0.0006 0.000 0.000 0.000
LATT -1
SYMM x+1/2, -y+1/2, -z
SYMM -x, y+1/2, -z+1/2
SYMM -x+1/2, -y, z+1/2
SFAC C H O
UNIT 60 96 20
LIST 4 ! automatically inserted. Change 6 to 4 for CHECKCIF!!
TEMP -173.100
SIZE 0.250 0.380 0.450
ACTA
EQIV $1 -x+3/2, -y+1, z+1/2
HTAB O2 O4_$1
HTAB O4 O5
EQIV $2 x+1, y, z
HTAB O5 O3_$2
EQIV $3 x+1/2, -y+1/2, -z+1
HTAB O5 O1_$3
L.S. 4
FMAP 2
PLAN -4 0 0.00
HTAB
BOND $H
CONF
WGHT    0.044100    0.281400
FVAR       0.98640
O1    3    0.626237    0.225543    0.604798    11.00000    0.09045    0.01810 =
         0.02609    0.00273   -0.00775    0.01298
O2    3    0.558498    0.428167    0.640479    11.00000    0.03990    0.02079 =
         0.01596    0.00540    0.00372    0.00736
AFIX 148
H21   2    0.565324    0.397584    0.681731    11.00000   -1.50000
AFIX   0

O3    3    0.449295    0.664643    0.404969    11.00000    0.01652    0.01755 =
         0.01920    0.00374    0.00021   -0.00056
O4    3    0.930244    0.641761    0.286630    11.00000    0.02259    0.02081 =
         0.01728   -0.00382   -0.00007    0.00397
AFIX 148
H22   2    0.996571    0.608306    0.314903    11.00000   -1.50000
AFIX   0
C1    1    0.678436    0.997530    0.301661    11.00000    0.02221    0.01780 =
         0.02339    0.00393    0.00089   -0.00141
AFIX  23
H1    2    0.780112    1.028511    0.282698    11.00000   -1.20000
H10   2    0.608260    1.074414    0.306708    11.00000   -1.20000
AFIX   0
C2    1    0.693996    0.923175    0.379296    11.00000    0.01887    0.01567 =
         0.01726   -0.00203   -0.00196    0.00113
AFIX  13
H18   2    0.766347    0.964909    0.417480    11.00000   -1.20000
AFIX   0
C3    1    0.739186    0.780596    0.353658    11.00000    0.01808    0.01529 =
         0.01292   -0.00090   -0.00124   -0.00078
C4    1    0.732198    0.681552    0.422226    11.00000    0.01652    0.01900 =
         0.01286    0.00040   -0.00150    0.00111
AFIX  23
H17   2    0.826625    0.626372    0.422015    11.00000   -1.20000
H16   2    0.729558    0.731229    0.471947    11.00000   -1.20000
AFIX   0
C5    1    0.589972    0.591266    0.417374    11.00000    0.01852    0.01576 =
         0.01595   -0.00089   -0.00062    0.00106
AFIX  13
H20   2    0.604194    0.526586    0.373834    11.00000   -1.20000
AFIX   0
O5    3    1.138903    0.549769    0.393138    11.00000    0.02277    0.01755 =
         0.02680    0.00294   -0.00062   -0.00006
AFIX   3
H23   2    1.233694    0.581470    0.397475    11.00000   -1.50000
H24   2    1.140794    0.465470    0.399875    11.00000   -1.50000
AFIX   0
C6    1    0.572012    0.517355    0.492321    11.00000    0.01810    0.01791 =
         0.01554   -0.00125    0.00062   -0.00050
AFIX  43
H5    2    0.527038    0.564881    0.534356    11.00000   -1.20000
AFIX   0
C7    1    0.611982    0.392316    0.506808    11.00000    0.03020    0.01915 =
         0.01857    0.00024   -0.00053    0.00400
C8    1    0.599120    0.340129    0.588321    11.00000    0.02828    0.01543 =
         0.02103    0.00084   -0.00396    0.00057
C9    1    0.674104    0.295533    0.448170    11.00000    0.11398    0.03316 =
         0.02395   -0.00094    0.00484    0.03536
AFIX 137
H4    2    0.609770    0.215721    0.447982    11.00000   -1.50000
H3    2    0.780262    0.271757    0.462018    11.00000   -1.50000
H2    2    0.672801    0.335995    0.396264    11.00000   -1.50000
AFIX   0
C10   1    0.467211    0.785075    0.358604    11.00000    0.01793    0.01530 =
         0.01683    0.00267   -0.00024   -0.00118
C11   1    0.307055    0.811932    0.326424    11.00000    0.01663    0.02091 =
         0.02572    0.00302   -0.00225    0.00092
AFIX 137
H6    2    0.277529    0.740335    0.290870    11.00000   -1.50000
H8    2    0.307298    0.896249    0.298148    11.00000   -1.50000
H7    2    0.232952    0.816548    0.369480    11.00000   -1.50000
AFIX   0
C12   1    0.529515    0.899907    0.410399    11.00000    0.01890    0.01832 =
         0.01846   -0.00172   -0.00004    0.00140
AFIX  23
H19   2    0.465403    0.980432    0.404510    11.00000   -1.20000
H9    2    0.531469    0.873922    0.466021    11.00000   -1.20000
AFIX   0
C13   1    0.609512    0.890697    0.246578    11.00000    0.02134    0.02455 =
         0.01709    0.00596   -0.00175   -0.00055
AFIX  23
H12   2    0.506610    0.917746    0.227223    11.00000   -1.20000
H11   2    0.678276    0.874473    0.201506    11.00000   -1.20000
AFIX   0
C14   1    0.597686    0.766638    0.298740    11.00000    0.01753    0.01642 =
         0.01417   -0.00023   -0.00192    0.00023
AFIX  13
H13   2    0.593404    0.681086    0.269470    11.00000   -1.20000
AFIX   0
C15   1    0.896029    0.773867    0.313603    11.00000    0.01708    0.01759 =
         0.01925   -0.00195    0.00119   -0.00033
AFIX  23
H14   2    0.897045    0.835529    0.268753    11.00000   -1.20000
H15   2    0.977076    0.802542    0.350597    11.00000   -1.20000
REM #####
REM #####
AFIX   0
HKLF 4 1 1 0 0 0 1 0 0 0 1


REM  ldlb37_0m_a.res in P2(1)2(1)2(1)
REM R1 =  0.0314 for    2874 Fo > 4sig(Fo)  and  0.0325 for all    2967 data
REM    187 parameters refined using      0 restraints

END

WGHT      0.0441      0.2814

REM Instructions for potential hydrogen bonds
HTAB O2 O4_$1
HTAB O4 O5
HTAB O5 O3_$2
HTAB O5 O1_$3

REM Highest difference peak  0.218,  deepest hole -0.174,  1-sigma level  0.037
Q1    1   0.6622  0.6386  0.4178  11.00000  0.05    0.22
Q2    1   0.7288  0.2233  0.4596  11.00000  0.05    0.21
Q3    1   0.6399  0.4640  0.5022  11.00000  0.05    0.21
Q4    1   0.5248  0.7773  0.3240  11.00000  0.05    0.21
;
_shelx_res_checksum                     90144

_shelx_hkl_file                         
;
  -1   0   0    0.90    0.50
   2   0   0 1563.04   61.29
   2   0   0 1582.94   60.99
  -2   0   0 1470.45   62.59
  -3   0   0   -0.60    1.90
   3   0   0    0.00    0.80
   4   0   0 1722.33   69.79
  -4   0   0 1723.93   73.49
   4   0   0 1699.93   70.29
   5   0   0    2.80    1.60
   5   0   0    2.00    1.70
   6   0   0 1838.42   77.89
   6   0   0 1759.42   78.69
   6   0   0 1842.32   79.89
  -6   0   0 1960.80   85.19
   7   0   0   -5.10    4.70
   7   0   0    1.10    4.40
   7   0   0    0.20    1.80
   8   0   0   94.49    7.40
  -9   0   0   -1.50    1.50
   9   0   0   -0.10    1.70
  10   0   0   32.60    3.90
   0   1   0    0.50    0.10
   0   1   0    1.10    0.40
  -1  -1   0  221.38   10.60
  -1   1   0  219.68    9.60
   1  -1   0  225.38    9.60
   1   1   0  237.08    9.70
   1  -1   0  245.78    9.40
  -1   1   0  236.28   11.00
   2   1   0 5640.74  221.98
   2  -1   0 5602.34  220.98
   2  -1   0 5831.82  221.18
   3   1   0 1800.32   70.79
  -3   1   0 1821.42   73.99
  -3  -1   0 1666.63   73.19
   3  -1   0 1786.32   70.79
   3  -1   0 1762.92   70.69
  -4   1   0 1279.97   56.19
   4   1   0 1282.27   53.29
   4  -1   0 1235.48   53.19
  -4  -1   0 1163.88   56.39
   4   1   0 1275.37   52.29
   4  -1   0 1321.27   52.49
   5  -1   0 1383.56   57.49
   5   1   0 1306.37   57.89
   5  -1   0 1321.77   56.89
  -5   1   0 1433.06   62.29
  -5  -1   0 1344.87   62.09
   5   1   0 1282.17   56.69
   6   1   0   58.39   11.40
   6  -1   0   78.29    6.30
  -6   1   0  102.59   12.50
   6   1   0   86.69    7.90
   6   1   0   78.89    8.70
   6  -1   0   89.49    9.10
   7   1   0  123.79   14.00
   7  -1   0  172.68   11.30
   7  -1   0  147.19   16.70
   7   1   0  167.58    9.70
  -7   1   0  182.98   31.00
   7   1   0  132.69   11.80
   8   1   0  103.99    7.60
   8   1   0  106.09   10.30
   8   1   0   78.49   15.40
   9   1   0  218.28   11.80
  -9   1   0  224.28   12.30
   9  -1   0  220.68   12.50
 -10  -1   0   52.89    4.70
  10  -1   0   47.70    5.20
 -10   1   0   49.50    5.10
   0   2   0 3286.17  126.59
   0   2   0 3128.59  124.09
  -1   2   0 7558.04  292.17
   2   2   0  326.27   14.60
  -2   2   0  359.46   17.20
   2   2   0  318.27   15.70
   2  -2   0  340.87   13.90
   3  -2   0  685.33   28.00
  -3  -2   0  648.04   31.20
   3   2   0  643.34   29.60
   3   2   0  674.13   28.40
  -3   2   0  687.43   31.70
   4   2   0  179.88   11.00
  -4  -2   0  151.58   12.30
   4  -2   0  173.28    9.70
  -4   2   0  166.18   12.60
   5  -2   0   11.90    3.10
  -5   2   0   10.20    5.50
   5   2   0   10.60    3.80
   5   2   0   16.00    4.50
  -5  -2   0   10.30    7.40
  -6   2   0  380.36   25.40
   6   2   0  311.87   16.80
  -6  -2   0  332.17   16.30
   6   2   0  377.96   20.20
   6   2   0  357.46   21.40
   6   2   0  353.66   19.70
   6  -2   0  372.86   20.40
  -6   2   0  315.07   17.30
   6  -2   0  342.07   17.60
   7   2   0    3.80    4.30
   7   2   0   -1.70    2.80
  -7   2   0  -11.20   12.40
   7  -2   0    2.40    1.50
   8  -2   0  160.48   10.10
   8   2   0  117.69   19.20
   8   2   0  119.59   11.30
  -8   2   0  158.08    9.90
  -9   2   0   10.00    2.40
   9  -2   0    4.80    1.70
 -10  -2   0    9.70    1.90
 -10   2   0    5.60    2.40
  10  -2   0    7.50    2.00
   0   3   0    0.50    0.30
   0   3   0    1.20    1.10
   0   3   0    0.00    0.40
   1   3   0 2993.30  121.49
   1   3   0 3019.10  119.99
  -1   3   0 2997.90  119.29
   1   3   0 3275.77  123.89
  -1   3   0 3117.09  123.39
  -2  -3   0 2746.53  113.49
   2   3   0 2694.53  111.79
   2   3   0 2899.41  110.29
  -2   3   0 2882.71  113.99
   3   3   0 1002.40   43.10
  -3  -3   0  946.31   44.90
   3   3   0  978.00   41.20
  -3   3   0 1045.30   45.50
  -4  -3   0  272.87   19.10
   4   3   0  334.47   16.10
   4   3   0  304.07   17.20
  -4   3   0  327.67   19.90
   5  -3   0  387.16   19.80
   5   3   0  437.26   21.80
  -5   3   0  391.46   20.50
   5   3   0  406.76   21.10
   5   3   0  422.16   23.00
  -5   3   0  449.46   26.50
   6   3   0   38.60    6.00
  -6   3   0   37.60    4.90
   6  -3   0   36.20    4.20
  -6   3   0   46.80   12.60
   6   3   0   38.70    5.70
  -6   3   0   35.20    4.90
   6   3   0   29.60    6.70
  -7   3   0   12.30    3.20
  -7   3   0   17.20    3.80
  -7  -3   0   15.90    3.20
   7   3   0   13.70    6.00
  -7   3   0   12.10   11.80
   7  -3   0   11.40    2.70
   7   3   0    9.50    3.50
  -8   3   0  102.39    8.60
   8  -3   0   97.89   11.60
   9  -3   0   33.40    4.10
  -9   3   0   32.90    4.10
   9   3   0   22.90    4.80
  10  -3   0   20.80    2.90
   0   4   0   -0.10    1.50
   0   4   0    2.60    1.00
  -1   4   0 1311.57   56.49
   1   4   0 1214.18   51.69
   1   4   0 1375.76   56.79
   1   4   0 1332.47   53.79
  -2   4   0 1798.12   75.39
   2   4   0 1758.52   70.49
   2   4   0 1742.83   72.59
   3   4   0   22.70    3.00
   3   4   0   20.00    3.60
  -3   4   0   22.00    4.90
   4   4   0   18.30    3.50
  -5   4   0    3.00    4.50
   5   4   0    5.70    3.20
  -5   4   0    3.40    2.10
  -5   4   0    8.80    2.90
  -5   4   0    4.70    2.70
  -5  -4   0    2.60    1.90
   5   4   0    1.90    2.20
   5   4   0    2.50    2.30
   6   4   0   68.49    8.00
   6   4   0   53.39   11.80
  -6   4   0   66.59    5.90
  -6   4   0   59.39   11.60
  -6   4   0   67.09    6.90
  -6  -4   0   72.69    5.60
   6   4   0   92.89   10.90
   7   4   0   34.10    6.00
   7  -4   0   41.60    5.00
  -7   4   0   40.90    5.20
  -7  -4   0   45.00    4.50
  -8   4   0   34.70    4.40
   8   4   0   31.90    5.50
   8  -4   0   29.40    4.30
   9  -4   0    2.80    1.70
   9   4   0   -2.30    2.40
  -9   4   0    0.60    1.90
  10  -4   0    6.30    1.60
   0   5   0    0.20    1.70
   0   5   0    3.20    1.20
   1   5   0   18.90    3.00
  -1   5   0   18.60    4.80
   1   5   0   23.10    4.30
   1   5   0   14.40    1.90
  -2   5   0 1326.57   59.99
   2   5   0 1322.97   54.49
   2   5   0 1333.57   56.59
  -3   5   0  759.92   38.30
   3   5   0  715.03   34.60
   3   5   0  723.63   32.10
   4  -5   0  113.69    8.20
   4   5   0  124.99    9.70
   4   5   0  122.79   13.00
   4   5   0  122.39   10.60
  -4   5   0  123.69    8.20
  -4   5   0  125.39   12.70
  -5   5   0   14.60    2.90
  -5   5   0   20.60    4.40
   5   5   0   11.40    3.60
   5   5   0   10.80    4.40
   5   5   0   16.30    4.50
  -5   5   0   14.50    7.90
   5  -5   0    8.80    2.20
  -6  -5   0   27.10    3.70
   6   5   0   28.30    5.20
  -6   5   0   16.40    8.80
   6   5   0   24.40    6.10
   6  -5   0   23.10    4.00
  -6   5   0   35.70    5.00
   7   5   0  309.67   18.80
  -7   5   0  306.87   17.00
   7   5   0  268.17   22.60
  -7   5   0  247.98   26.50
   7  -5   0  294.57   16.30
   8  -5   0   47.90    5.10
   8   5   0   44.50    6.20
  -8   5   0   45.70    5.10
  -9   5   0   13.10    2.90
   9  -5   0   18.40    2.70
   9   5   0   11.60    2.90
   0   6   0  360.46   16.90
   0   6   0  371.26   22.20
   1   6   0  275.17   18.30
   1   6   0  295.37   15.40
  -1   6   0  266.87   18.50
   2   6   0   65.59    6.70
  -2   6   0   81.89    9.40
  -2   6   0   75.29    7.10
  -2   6   0   66.39    5.80
   2   6   0   81.09    7.70
   3   6   0   54.89    7.30
  -3   6   0   53.89    6.20
  -3   6   0   52.69    5.40
  -3   6   0   60.49    9.30
   3   6   0   48.90    5.50
   3   6   0   52.69    5.60
   3   6   0   57.99    6.20
   4   6   0  254.17   15.60
  -4   6   0  256.17   13.60
  -4   6   0  236.58   19.90
  -4   6   0  228.78   14.80
   4  -6   0  234.68   13.50
   4   6   0  237.18   21.80
  -5   6   0  551.34   25.80
  -5  -6   0  611.84   26.60
  -5   6   0  529.75   41.90
   5  -6   0  545.35   26.70
   5   6   0  510.05   31.50
   5   6   0  610.14   29.40
  -5   6   0  548.85   28.30
  -6   6   0    3.00    8.20
   6   6   0    3.20    2.70
   6   6   0   15.60    7.80
   6  -6   0   -1.40    1.70
  -6   6   0    3.70    1.90
  -6   6   0    1.90    2.10
  -6  -6   0    0.70    1.70
   7  -6   0   29.00    4.20
  -7  -6   0   27.10    3.90
  -7   6   0   31.20    4.80
   7   6   0   29.60    5.20
  -8   6   0  266.77   17.30
   8  -6   0  241.48   13.40
   8   6   0  228.38   15.20
   9   6   0   41.80    4.70
   9  -6   0   47.90    4.50
  -9   6   0   48.60    4.50
   0   7   0   -1.20    2.00
   0   7   0   -2.40    1.80
   0   7   0   -2.70    2.50
  -1   7   0  359.76   23.20
   1   7   0  360.76   22.90
  -1   7   0  318.67   18.50
   1   7   0  322.87   18.10
   1   7   0  327.57   18.80
   1   7   0  340.37   18.50
   1   7   0  326.47   16.80
  -1   7   0  363.06   17.60
  -2  -7   0   16.70    3.00
  -2   7   0   16.40    6.10
   2   7   0   23.80    4.60
   2   7   0   16.80    3.90
  -2   7   0   23.60    4.00
   2   7   0   16.10    4.80
  -2   7   0   20.60    4.10
  -3   7   0  102.89   13.60
  -3   7   0  106.19    9.20
  -3   7   0  114.59    8.10
   3  -7   0  111.49    8.60
   3   7   0  106.59    8.40
  -3  -7   0  105.09    7.10
   3   7   0  109.89    9.50
  -4   7   0  136.59   11.30
   4   7   0  158.38   11.70
  -4   7   0  151.48   16.50
  -4   7   0  160.88   10.00
   4   7   0  157.58   15.00
   5   7   0   10.00    6.40
  -5   7   0   22.70    4.40
  -5   7   0   32.70    3.90
  -5  -7   0   26.20    3.50
   5  -7   0   19.40    4.10
  -5   7   0   16.90    8.20
   5   7   0   27.20    5.20
  -6   7   0  158.38   27.80
  -6   7   0  197.88   11.20
   6   7   0  210.98   14.70
   6  -7   0  204.98   12.50
  -6   7   0  199.98   13.50
  -6  -7   0  212.28   11.20
   7   7   0  577.54   30.20
  -7  -7   0  601.04   25.90
  -7   7   0  620.34   28.80
   7  -7   0  617.34   28.00
   8  -7   0    2.30    1.70
   8   7   0    0.40    1.80
  -8   7   0    0.80    2.50
   0   8   0   58.39    5.50
   0   8   0   49.50    7.60
   0   8   0   49.30    6.00
   0   8   0   38.40    8.00
  -1   8   0  204.88   23.90
   1   8   0  164.58    9.80
  -1   8   0  158.68   11.70
   1   8   0  141.99   11.30
   2   8   0  146.79   10.40
   2   8   0  140.59   14.40
  -2   8   0  155.78    9.70
  -2   8   0  129.39   10.60
  -2   8   0  118.49   14.90
  -3   8   0  249.28   16.00
   3   8   0  249.28   14.80
  -3   8   0  265.67   30.40
   3   8   0  247.98   15.90
  -3   8   0  266.37   14.30
  -3  -8   0  234.28   12.80
   3   8   0  246.38   20.20
   4  -8   0  172.68   11.50
  -4   8   0  202.18   19.60
  -4   8   0  197.48   13.80
  -4   8   0  207.28   11.80
  -5   8   0  360.16   17.70
   5  -8   0  351.36   18.10
   5   8   0  336.97   20.60
  -5   8   0  342.57   20.00
  -5  -8   0  379.86   17.60
  -6   8   0   38.00    5.20
   6  -8   0   40.20    4.60
   6   8   0   40.00    6.00
  -6  -8   0   40.10    3.80
  -7   8   0   39.60    4.40
   7  -8   0   38.20    4.00
   8  -8   0   12.90    2.60
  -8   8   0   13.00    2.60
   8   8   0   10.60    2.70
   0   9   0    1.50    1.80
   0   9   0    2.00    1.80
   0   9   0   -5.80    4.10
  -1   9   0  245.28   20.70
   1   9   0  269.67   16.10
  -1   9   0  256.47   16.30
  -1  -9   0  253.37   14.00
  -1   9   0  277.47   14.70
   1   9   0  267.17   16.00
   2   9   0    2.80    2.80
  -2   9   0    6.10    6.90
  -2   9   0   -1.20    1.60
   2   9   0    2.40    1.60
   3   9   0   10.60    2.70
  -3   9   0    6.70    2.30
  -3   9   0   -6.70    7.30
  -3   9   0   12.60    3.60
   3   9   0    6.00    3.50
  -3  -9   0    7.50    2.70
  -4  -9   0    7.00    2.10
  -4   9   0    9.60   14.10
   4   9   0    9.40    3.20
  -4   9   0    8.40    3.20
  -4   9   0    9.30    2.50
  -5   9   0    6.80    1.80
   5   9   0   10.20    3.10
  -5  -9   0    9.60    2.00
  -5   9   0   10.00    2.70
  -6   9   0    2.10    1.70
  -6  -9   0    1.90    2.00
   6   9   0    3.20    2.60
   7   9   0  195.88   12.00
   7  -9   0  236.08   11.40
  -7   9   0  218.48   10.90
   0 -10   0  164.18   10.20
   0  10   0  165.68   11.60
  -1 -10   0    0.80    1.20
   1  10   0   -0.90    1.60
  -1  10   0    0.10    1.10
   1  10   0    8.70    5.90
  -2 -10   0   41.10    4.00
   2  10   0   33.70    5.50
   2  10   0   38.10    4.80
  -2  10   0   43.30    4.60
  -2  10   0   40.40    5.60
   3  10   0   83.59    7.90
  -3  10   0   98.39    6.80
  -3 -10   0   87.49    6.70
  -3  10   0   77.89    7.60
  -4  10   0   57.49    6.00
   4  10   0   63.29    7.70
  -4 -10   0   61.89    4.80
  -5 -10   0   -0.20    0.90
   5  10   0    4.10    2.10
  -5  10   0    0.40    1.30
  -6  10   0   20.90    2.70
   6 -10   0   24.50    2.30
   6  10   0   14.80    3.80
   0 -11   0    1.00    1.10
   0  11   0    1.60    1.50
  -1  11   0  351.06   18.50
   1 -11   0  351.86   17.10
   1  11   0  353.26   18.10
  -2  11   0   24.10    3.80
   2 -11   0   20.20    2.90
   2  11   0   22.40    3.30
  -3 -11   0    3.90    1.30
   3 -11   0    2.60    1.30
  -3  11   0    2.10    1.50
  -4  11   0  382.06   19.10
  -4 -11   0  381.16   17.00
   4  11   0  396.46   18.20
   4 -11   0  385.96   17.70
   5 -11   0   14.60    1.80
  -5  11   0   18.60    2.30
   0 -12   0   62.29    4.80
   0  12   0   57.49    4.70
  -1  12   0   24.20    3.30
   1 -12   0   21.20    2.40
   1  12   0   22.60    2.90
  -1 -12   0   21.70    2.90
  -2  12   0   10.70    2.10
  -2 -12   0   12.20    1.80
   2 -12   0    8.30    1.50
   0   0  -1    0.20    0.30
   0   0   1    0.20    0.20
   1   0   1  343.57   14.00
   1   0   1  315.47   13.40
   1   0  -1  307.37   13.20
  -1   0   1  312.07   14.10
  -1   0  -1  345.57   14.30
   3   0   1  393.76   17.50
  -3   0  -1  387.16   19.30
  -3   0   1  359.76   18.80
   3   0  -1  362.96   16.90
   3   0  -1  344.77   16.90
   4   0   1    4.00    1.90
  -4   0  -1    7.00    4.60
   4   0  -1    1.50    1.20
   5   0   1 1779.42   72.99
   5   0  -1 1738.93   72.09
  -5   0  -1 1726.63   76.89
   5   0  -1 1778.62   71.69
   5   0   1 1579.84   71.39
  -5   0   1 1763.72   76.59
   6   0   1  231.98   15.40
  -6   0  -1  200.78   18.70
   6   0  -1  203.08   14.40
  -6   0   1  205.98   18.00
   6   0   1  234.58   15.40
   6   0  -1  237.58   14.30
   7   0   1   48.00    5.30
  -7   0   1   56.99    4.90
   7   0   1   41.80    9.30
   7   0  -1   44.70    7.80
   7   0   1   52.59    7.80
   7   0  -1   58.09    7.20
   7   0  -1   44.50    9.50
   8   0   1  244.78   13.70
   8   0  -1  237.38   13.60
  -9   0   1   16.10    3.00
   9   0   1   19.40    3.70
   9   0  -1   17.30    3.10
  10   0   1   10.60    2.30
 -10   0  -1    7.90    1.90
   0  -1  -1 3284.57  133.59
   0   1   1 3602.04  133.59
  -1   1   1 4234.68  178.68
   1  -1   1 4757.32  179.08
   1   1   1 4793.02  179.58
  -1   1  -1 4610.94  178.98
   1   1   1 4680.93  178.98
   2  -1   1 1267.57   49.99
   2   1  -1 1275.17   49.60
  -2  -1  -1 1142.09   51.19
  -2   1   1 1338.17   52.19
   2   1   1 1248.48   49.90
  -2  -1   1 1188.68   51.39
   2  -1  -1 1249.97   49.50
   2   1   1 1217.08   50.49
  -2   1  -1 1298.07   52.09
   3   1  -1 3233.08  130.89
  -3   1   1 3283.87  133.89
   3  -1   1 3227.78  131.29
   3  -1   1 3555.64  131.79
  -3  -1  -1 3321.57  134.09
   3   1   1 3480.95  131.49
  -3  -1   1 3175.28  133.69
  -3   1  -1 3349.86  134.49
   3   1   1 3323.57  132.19
   3  -1  -1 3394.86  130.99
   3  -1  -1 3317.97  130.99
  -4   1   1 2612.24  106.79
   4  -1   1 2621.84  103.69
   4   1  -1 2646.14  102.89
   4   1  -1 2483.35  103.79
  -4  -1  -1 2599.14  107.09
   4  -1  -1 2256.57  104.39
   4   1   1 2515.35  103.09
   4   1   1 2643.84  104.29
   4  -1  -1 2638.84  102.79
  -4  -1   1 2675.33  107.09
  -4   1  -1 2589.74  107.19
  -5  -1  -1 1086.19   52.89
   5  -1   1 1138.59   48.60
   5   1  -1 1116.09   48.50
   5   1  -1 1075.89   47.30
  -5   1   1 1148.39   52.69
   5   1   1 1112.09   47.80
   5   1   1 1098.29   49.10
   5  -1  -1 1160.38   47.70
  -5   1  -1 1085.59   52.49
  -5  -1   1 1062.79   51.89
   5  -1  -1 1049.70   47.40
   6   1  -1  436.96   22.00
   6  -1   1  485.35   32.90
   6  -1   1  341.87   29.00
   6   1  -1  413.26   22.20
   6   1  -1  405.86   22.70
   6  -1   1  395.46   19.50
  -6   1   1  380.76   18.80
  -6   1   1  445.86   27.30
   6  -1  -1  379.16   21.20
  -6   1  -1  427.46   28.00
   6   1   1  350.36   19.00
   6   1   1  420.86   23.50
   6   1   1  412.96   23.30
   6  -1  -1  415.96   22.30
  -6  -1   1  421.46   27.50
  -6  -1   1  366.66   18.30
   7   1  -1 1361.56   55.89
   7  -1   1 1249.97   56.39
   7   1  -1 1346.87   59.59
  -7   1   1 1393.06   55.09
   7  -1   1 1171.48   60.39
   7   1  -1 1330.47   66.99
  -7  -1   1 1337.37   54.59
   7   1   1 1363.56   55.99
   7   1   1 1273.97   69.09
   7   1   1 1414.56   65.29
   7  -1  -1 1370.96   56.59
   8   1  -1   25.90    4.10
   8   1  -1   13.50    9.90
   8  -1   1   21.90    3.70
   8   1  -1   15.70    5.00
   8   1   1   10.40    9.10
   8   1   1   27.70    4.10
   8   1   1   23.70    5.10
   8  -1  -1   18.00    3.40
   9   1  -1   59.79    5.30
   9  -1   1   49.50    5.20
  -9   1   1   53.89    5.10
   9   1   1   45.20    5.10
   9  -1  -1   61.69    5.40
  -9   1  -1   69.09    5.60
  10  -1   1   72.19    5.00
 -10  -1  -1   59.39    4.70
 -10   1  -1   69.99    4.90
   0   2   1   51.39    3.60
   0   2   1   44.00    3.90
   0   2  -1   49.60    4.20
  -1   2   1  998.10   39.00
   1   2  -1  886.41   37.20
  -1   2   1  879.81   36.60
   1   2   1  891.31   38.00
   1   2   1  931.51   37.20
   1   2   1  962.30   38.90
  -1   2  -1  947.81   37.10
  -1   2  -1 1002.20   40.00
   2   2  -1 2714.53  104.09
  -2   2   1 2659.33  106.49
  -2   2  -1 2732.43  107.29
   2   2   1 2676.33  104.29
   2  -2  -1 2619.34  103.79
  -2  -2   1 2625.54  106.59
   2  -2  -1 2632.64  103.09
   2   2   1 2563.54  105.29
  -3   2   1 1237.08   53.09
   3   2  -1 1246.88   49.90
  -3  -2  -1 1110.59   52.59
   3  -2   1 1249.97   49.99
   3   2   1 1281.77   50.29
   3   2   1 1206.08   51.29
   3  -2  -1 1278.47   49.90
   3  -2  -1 1252.77   49.30
  -3  -2   1 1170.68   52.89
  -3   2  -1 1229.88   53.59
  -4   2   1  893.71   40.90
  -4  -2  -1  783.82   40.50
   4   2  -1  850.41   36.80
   4   2  -1  801.72   38.10
   4  -2   1  882.71   37.20
   4   2   1  817.12   37.00
  -4   2  -1  880.01   41.40
   4  -2  -1  938.71   37.10
  -4  -2   1  854.21   41.00
   4  -2  -1  874.51   36.40
   4   2   1  884.01   38.60
   5  -2   1   95.49    8.20
  -5   2   1  117.69   11.20
   5   2  -1   95.59    7.70
  -5  -2   1  102.29   11.40
   5  -2  -1   99.49    7.70
   5   2   1   84.79    8.70
  -5   2  -1   99.09   16.40
   5  -2  -1   99.79    7.70
   6   2  -1  538.05   25.30
   6   2  -1  575.64   28.20
   6   2  -1  559.64   28.20
  -6   2   1  570.84   33.20
   6   2  -1  575.24   29.70
   6  -2   1  533.45   25.80
   6  -2   1  580.94   29.00
  -6   2   1  542.75   26.00
  -6  -2   1  483.65   25.00
  -6   2  -1  577.54   34.90
   6   2   1  586.64   30.50
   6  -2  -1  572.34   26.10
   6   2   1  522.75   28.20
   6   2   1  624.14   29.40
   6  -2  -1  562.44   28.00
  -7   2   1   80.69    6.60
  -7   2   1   69.89   15.60
   7  -2   1   88.89    7.10
  -7   2   1   75.09    6.60
   7   2  -1   80.49    8.80
   7   2  -1   86.49    8.70
   7   2  -1   74.69    6.60
   7   2  -1   76.29   10.20
   7   2   1   68.79   10.30
   7   2   1   84.69    9.00
   7   2   1   66.69    6.70
   7  -2  -1   77.99    6.70
  -7  -2   1   74.19    6.20
  -8   2   1  162.58   10.00
   8  -2   1  152.48   10.00
   8   2  -1  136.69   11.50
   8   2  -1   98.29   24.80
   8  -2  -1  144.59    9.90
  -8   2  -1  153.98    9.90
   8   2   1  116.09   11.30
  -9   2   1   44.50    4.70
   9  -2   1   39.10    4.70
   9  -2  -1   49.50    4.90
  -9   2  -1   51.99    4.80
 -10  -2  -1  171.78   10.70
  10  -2   1  182.88   11.20
  10  -2  -1  185.88   10.00
   0   3   1 1136.69   46.90
   0   3  -1 1050.09   44.10
   0   3   1 1186.88   45.00
   0   3  -1 1112.49   48.00
  -1   3   1  198.38   11.00
   1   3  -1  191.28    8.80
   1   3  -1  209.78   12.20
   1   3   1  200.88    8.80
  -1   3  -1  196.78   11.80
   1   3   1  195.38   11.00
   1   3   1  195.98    9.90
  -1   3  -1  191.58    8.70
   2   3  -1  117.09    6.30
  -2   3   1  126.49    8.60
   2   3   1  115.79    6.40
  -2   3  -1  120.99    9.00
   2   3   1  118.49    7.60
  -3   3   1  694.23   32.80
   3   3  -1  671.13   29.20
   3   3  -1  631.74   30.80
   3   3   1  702.13   31.10
  -3  -3   1  705.13   33.40
  -3   3  -1  692.63   33.50
   3   3   1  691.53   29.50
  -4   3   1 1540.15   67.49
   4  -3   1 1481.35   60.99
   4   3  -1 1533.25   64.99
   4   3  -1 1557.64   62.99
   4   3   1 1529.05   65.09
  -4  -3   1 1503.75   68.29
   4   3   1 1522.95   63.19
   5   3  -1  378.06   19.50
   5   3  -1  362.06   19.70
   5  -3   1  359.46   18.20
  -5   3   1  403.96   24.20
   5   3  -1  369.26   20.90
   5   3   1  384.26   20.20
   5   3   1  371.86   21.50
   5   3   1  359.76   19.50
  -5   3  -1  345.77   18.60
  -5   3  -1  386.06   24.60
   6   3  -1  227.18   14.70
   6   3  -1  205.38   15.90
  -6   3   1  235.78   20.20
   6   3  -1  229.38   14.70
  -6   3   1  227.28   12.50
  -6   3   1  210.58   13.10
   6  -3   1  219.18   12.80
  -6  -3   1  202.18   11.50
  -6   3  -1  250.87   22.30
   6   3   1  233.08   16.70
   6   3   1  255.67   15.60
  -6   3  -1  231.58   13.40
   6  -3  -1  226.08   12.90
   7  -3   1  506.45   24.20
  -7   3   1  521.15   24.40
   7   3  -1  505.75   26.70
  -7   3   1  494.25   22.90
   7   3  -1  491.15   29.40
  -7   3   1  519.65   34.20
  -7  -3   1  487.85   22.20
  -7   3  -1  505.85   24.40
   7  -3  -1  469.25   23.70
   7   3   1  446.16   26.30
   7   3   1  434.16   29.00
   8  -3   1   25.10    4.70
  -8   3   1   33.00    4.50
   8   3  -1   30.10    6.20
  -8   3  -1   38.60    5.60
   8   3   1   29.80    6.20
   8  -3  -1   32.70    6.10
   9   3  -1   41.00    8.10
   9  -3   1   57.09    5.40
  -9   3   1   54.89    5.60
  -9   3  -1   59.99    5.30
   9  -3  -1   55.29    5.20
 -10  -3  -1    4.00    1.60
  10  -3   1    7.50    1.90
  10  -3  -1    3.80    1.80
 -10   3  -1   -0.80    1.90
   0   4   1 1786.12   69.39
   0   4  -1 1670.13   68.09
   0   4  -1 1742.23   73.69
   0   4   1 1765.92   72.29
  -1   4   1  523.95   25.30
   1   4  -1  524.05   26.50
   1   4  -1  499.45   21.60
  -1   4  -1  567.44   21.20
  -1   4  -1  482.85   21.10
  -1   4  -1  535.05   26.50
   1   4   1  553.14   23.50
  -1   4  -1  517.95   22.00
   1   4   1  502.45   21.40
   1   4   1  533.65   25.30
   2   4  -1  100.69    7.70
   2   4  -1  110.09    7.40
  -2   4   1  124.09    9.40
   2   4   1  107.29    6.40
  -2   4  -1  135.59   10.30
   2   4   1  117.99    7.90
  -3   4   1  249.88   16.00
   3   4  -1  257.27   12.60
   3   4  -1  239.58   14.30
  -3  -4   1  244.78   17.00
  -3   4  -1  257.77   16.90
   3   4   1  244.08   14.40
   3   4   1  229.28   12.50
   4   4  -1  239.18   13.40
  -4   4   1  246.88   17.40
   4   4  -1  235.38   16.50
  -4   4  -1  254.77   18.30
   4   4   1  239.88   17.80
   4   4   1  248.28   13.70
  -5   4   1   69.19    7.00
  -5   4   1   68.99    5.90
   5   4  -1   74.29    7.40
   5   4  -1   81.69    7.40
  -5   4   1   81.39   10.50
   5   4  -1   79.39    8.40
  -5   4   1   91.59   10.10
   5  -4   1   66.39    6.00
  -5   4  -1   78.69    6.30
  -5   4  -1   77.49    7.00
  -5   4  -1   84.09   11.20
   5   4   1   74.39    7.30
   5   4   1   79.39    8.80
   5  -4  -1   79.79    6.40
   5   4   1   73.99    7.50
  -6   4   1    2.10    2.50
  -6  -4  -1   -2.00    1.90
  -6   4   1    0.10    2.00
  -6   4   1    1.60    2.20
  -6   4   1    4.70    6.70
   6   4  -1   -1.60    3.10
   6   4  -1   -1.20    3.10
  -6   4  -1    2.50    2.40
  -6   4  -1    0.20    2.20
  -6   4  -1   11.40    8.70
  -6  -4   1   -0.80    1.60
  -7   4   1  169.78   11.20
   7   4  -1  143.29   15.50
  -7   4   1  179.98   19.40
   7   4  -1  156.78   12.70
   7  -4   1  167.38   10.90
  -7   4  -1  157.08   10.90
   7   4   1  173.78   13.10
   7   4   1  135.19   15.60
   7  -4  -1  172.08   11.00
  -7   4  -1  188.98   22.90
  -7  -4   1  152.28    9.30
   8   4  -1   24.10    5.10
  -8   4   1   21.00    3.80
   8  -4   1   26.60    4.10
  -8  -4   1   21.50    3.80
   8   4   1   23.30    5.20
   8  -4  -1   27.10    4.00
  -8   4  -1   28.20    4.10
   9   4  -1  109.59    9.30
  -9   4   1  132.79    8.10
   9  -4   1  130.89    8.50
   9  -4  -1  139.09    8.80
  -9   4  -1  141.79    8.60
  10  -4   1   64.09    4.90
  10  -4  -1   63.29    4.70
   0   5  -1  105.29    9.80
   0   5  -1  120.19    6.80
   0   5   1  108.19    6.60
   0   5   1  110.09    9.00
   0   5  -1  108.09    5.50
  -1   5   1   91.19    8.30
   1   5  -1   97.49    7.00
   1   5  -1   89.89    5.20
   1   5  -1   87.89    9.00
   1   5   1  107.99    7.20
   1   5   1   92.99    8.30
  -1   5  -1   94.29    9.40
   2   5  -1 1035.80   47.90
   2   5  -1 1072.49   45.30
  -2   5   1 1149.29   51.09
   2   5  -1 1086.89   51.69
  -2   5  -1 1115.09   52.09
   2   5   1 1176.48   48.50
  -3   5   1   47.50    7.00
   3   5  -1   37.00    4.20
   3   5  -1   39.80    5.30
  -3   5  -1   39.20    7.20
   3   5   1   36.90    5.40
   3   5   1   35.90    4.20
  -4   5   1  297.57   20.80
  -4   5   1  249.68   17.90
  -4   5   1  273.67   18.50
   4  -5   1  263.87   14.80
   4   5  -1  286.57   15.60
   4   5  -1  298.27   16.90
   4   5  -1  308.17   18.30
   4  -5  -1  261.37   14.60
  -4   5  -1  267.17   15.80
   4   5   1  288.77   18.30
   4   5   1  284.07   16.50
  -4   5  -1  275.67   14.70
  -4   5  -1  300.77   21.50
  -5   5   1  191.08   17.40
  -5  -5  -1  201.38   10.60
   5   5  -1  199.98   15.30
   5   5  -1  179.48   14.00
  -5   5   1  201.28   11.30
   5   5  -1  197.28   13.20
   5  -5   1  183.98   11.90
  -5   5   1  184.78   12.70
   5   5   1  200.68   13.50
   5   5   1  204.58   15.90
  -5   5  -1  187.68   12.50
  -5   5  -1  204.38   11.10
  -5  -5   1  200.88   10.90
   5  -5  -1  190.78   11.70
  -5   5  -1  199.18   19.20
   6   5  -1   38.10    7.20
  -6   5   1   37.70    5.80
   6  -5   1   44.10    4.90
   6   5  -1   36.90    8.30
  -6   5   1   53.29   11.30
  -6  -5  -1   32.70    4.20
   6   5  -1   41.10    6.00
  -6   5   1   44.80    4.80
  -6   5  -1   45.10    5.60
   6   5   1   33.00    5.60
  -6   5  -1   42.40    4.80
   6  -5  -1   41.00    5.10
  -6  -5   1   37.20    4.20
   7   5  -1   30.90    5.90
  -7   5   1   28.60   12.40
   7   5  -1   21.70    8.80
  -7   5   1   30.20    5.10
   7  -5   1   35.10    4.80
  -7   5  -1   36.00    5.00
  -7  -5   1   38.40    4.50
   7  -5  -1   33.30    4.60
   7   5   1   31.00    9.50
  -7   5  -1   49.20   19.00
   8  -5   1   64.19    5.90
  -8   5   1   61.49    6.00
   8   5  -1   61.29    7.20
   8  -5  -1   70.49    6.00
   8   5   1   52.79    6.90
  -8   5  -1   68.19    6.30
   9   5  -1   38.40    5.10
   9  -5   1   54.09    4.70
  -9   5   1   55.79    5.60
   9  -5  -1   53.49    4.70
  -9   5  -1   57.09    5.00
   0   6   1 1010.60   42.80
   0   6   1 1042.20   48.40
   0   6  -1 1037.80   43.20
   0   6  -1 1062.09   50.19
   1   6  -1    9.40    2.60
   1   6  -1   11.10    4.30
  -1   6   1   19.10    5.40
   1   6  -1    8.50    1.70
  -1   6  -1   13.00    5.30
   1   6   1   18.10    4.70
  -2   6   1  652.33   34.40
   2   6  -1  662.53   28.00
   2   6  -1  638.24   30.10
  -2   6   1  648.64   29.00
  -2   6   1  598.44   30.10
   2   6  -1  674.03   31.40
  -2   6  -1  571.54   29.90
   2   6   1  709.53   31.90
  -2   6  -1  650.93   29.10
   2   6   1  634.94   30.00
  -2   6  -1  670.43   36.20
   3   6  -1  127.79   10.70
   3   6  -1  117.49    9.60
   3   6  -1  112.59    8.40
  -3   6   1  118.39    8.20
  -3   6   1  107.19    9.20
  -3   6   1  140.99   17.90
   3   6  -1  124.39    8.80
   3   6   1  123.49   10.90
  -3   6  -1  124.49    8.40
  -3   6  -1  120.79    9.60
  -3   6  -1  141.99   13.70
   3   6   1  137.39    9.30
   3   6   1  120.09    9.60
   4   6  -1  152.18   11.10
   4   6  -1  166.48   14.00
   4   6  -1  167.58   10.70
  -4   6   1  153.48   11.50
  -4   6   1  154.18    9.90
  -4   6   1  172.78   16.20
   4  -6   1  152.58   10.20
   4   6  -1  153.18   11.50
   4  -6  -1  152.48   10.00
   4   6   1  162.38   11.60
   4   6   1  169.98   17.20
  -4   6  -1  158.18   16.10
  -4   6  -1  156.68    9.90
  -4   6  -1  137.09   11.20
   5   6  -1  205.78   17.70
  -5   6   1  235.58   13.20
   5   6  -1  233.98   15.30
  -5   6   1  245.48   15.40
   5  -6   1  228.18   13.90
  -5   6   1  225.88   21.20
   5   6  -1  256.47   18.80
  -5   6  -1  245.98   15.40
   5   6   1  257.87   19.30
  -5  -6   1  248.58   12.90
  -5   6  -1  232.98   13.00
   5   6   1  255.87   15.90
   5  -6  -1  235.08   13.90
   6  -6   1  115.19    9.10
   6   6  -1  126.39   10.40
  -6   6   1  120.29    9.50
   6   6  -1  105.19   17.20
  -6   6   1   99.39   16.20
  -6   6   1  119.49    8.00
  -6  -6  -1  119.39    7.60
   6  -6  -1  111.49    8.70
  -6   6  -1  124.19    7.90
  -6   6  -1  117.19    9.60
  -6  -6   1  119.69    7.80
  -6   6  -1  108.89   16.20
   6   6   1  115.79   10.50
   6   6   1  117.39   17.30
   7   6  -1    9.60    3.40
  -7   6   1   18.00    3.70
   7  -6   1    9.50    2.20
   7   6   1   16.50    4.40
   7  -6  -1   13.10    2.90
  -7  -6   1   10.10    2.30
  -7   6  -1   12.10    3.10
  -8   6   1   81.49    6.40
   8   6  -1   72.69    7.50
   8  -6   1   85.79    6.60
  -8   6  -1   85.49    6.70
   8  -6  -1   80.19    6.40
   8   6   1   75.09    8.10
   9  -6   1   89.19    6.40
   9   6  -1   73.69    6.70
   9  -6  -1   96.79    6.30
  -9   6  -1   75.69    5.20
   0   7   1  368.66   20.00
   0   7  -1  379.36   18.60
   0   7  -1  353.36   19.90
   0   7  -1  398.96   35.60
   0   7   1  395.86   19.10
   0   7   1  380.96   23.40
   1   7  -1  738.13   32.60
   1   7  -1  714.63   38.20
  -1   7   1  676.33   32.70
  -1   7   1  721.63   31.30
   1   7  -1  666.73   32.30
   1   7  -1  718.53   31.60
  -1   7   1  708.53   37.00
  -1   7  -1  676.03   32.70
  -1   7  -1  715.63   31.20
   1   7   1  705.93   30.70
   1   7   1  686.03   32.40
  -1   7  -1  630.44   38.20
   1   7   1  621.84   32.20
   2   7  -1  720.63   33.40
   2   7  -1  669.93   31.20
   2   7  -1  639.94   32.00
  -2   7   1  641.34   31.60
  -2   7   1  680.53   30.20
  -2   7   1  628.84   36.00
  -2   7  -1  697.83   30.20
  -2   7  -1  628.84   37.60
   2   7   1  625.74   31.40
   2   7   1  707.23   33.50
   2   7   1  663.93   31.10
  -2   7  -1  614.14   31.40
  -2  -7   1  623.64   28.90
  -3   7   1  418.76   27.70
   3  -7   1  373.46   20.00
   3   7  -1  430.06   21.50
  -3   7   1  403.06   22.20
  -3   7   1  423.76   20.70
   3   7  -1  393.36   27.60
   3   7  -1  391.06   22.30
  -3   7  -1  436.46   29.30
  -3   7  -1  428.86   20.60
   3   7   1  445.06   21.70
   3   7   1  424.26   22.60
  -3  -7   1  408.46   19.40
  -3   7  -1  422.46   22.60
   4   7  -1   42.20    9.20
  -4   7   1   46.70   10.00
  -4   7   1   44.60    5.10
   4  -7   1   61.29    9.90
   4   7  -1   55.19    6.70
  -4   7   1   50.19    6.30
  -4   7  -1   51.49   11.70
  -4   7  -1   48.70    6.40
   4   7   1   44.70    9.80
   4   7   1   63.49    6.80
  -4   7  -1   46.60    5.00
  -5   7   1    4.30    2.00
   5   7  -1    3.30    2.70
  -5   7   1    6.50    2.80
   5  -7   1    7.40    2.60
  -5  -7  -1    4.20    1.70
   5   7  -1    3.10    5.60
  -5   7   1    7.60    7.10
  -5  -7   1    5.20    1.80
   5   7   1    0.00    6.60
  -5   7  -1    6.30    3.00
   5  -7  -1    3.60    1.90
  -5   7  -1    4.70    8.10
   5   7   1    3.20    2.50
  -5   7  -1    3.60    1.80
  -6   7   1  -13.10   11.60
  -6   7   1   10.80    2.60
  -6   7   1   10.60    3.40
   6   7  -1   11.70    4.20
  -6  -7  -1    7.40    2.10
   6  -7   1   14.90    3.10
   6  -7  -1    9.10    2.50
   6   7   1   11.10    3.90
  -6  -7   1    9.10    2.40
  -6   7  -1   -0.10   13.20
  -6   7  -1    9.10    3.10
   7  -7   1    1.10    1.50
  -7   7   1   -0.60    1.90
   7   7  -1    1.10    1.80
   7   7   1    1.90    2.60
   7  -7  -1   -0.50    1.50
  -7   7  -1   -0.10    2.00
  -7  -7   1    0.40    2.20
   8  -7   1    8.30    1.90
   8   7  -1    7.00    2.60
  -8   7   1   12.80    2.80
   8  -7  -1    7.00    2.10
  -8   7  -1   12.10    2.60
   8   7   1    8.10    2.70
   0   8  -1 2379.76   92.99
   0   8   1 2342.27   97.29
   0   8  -1 2060.79   94.69
   0   8   1 2482.35   93.19
   0   8  -1 2159.88   96.89
   1   8  -1   15.70    4.10
  -1   8  -1    7.30    7.40
   1   8   1   12.30    3.90
   1   8   1   21.00    6.30
   1   8   1   19.00    3.10
  -1   8  -1   19.00    5.50
  -2   8   1   66.99    7.20
   2   8  -1   75.79    7.60
  -2   8   1   59.29   10.60
  -2  -8  -1   74.69    6.90
  -2   8   1   72.79    6.40
   2   8  -1   59.89    6.50
  -2  -8   1   64.79    5.90
  -2   8  -1   74.39    6.20
   2   8   1   78.19    7.00
  -2   8  -1   64.09    7.20
  -2   8  -1   65.59   12.00
  -3  -8  -1   94.49    7.00
   3   8  -1  103.79   14.10
  -3   8   1  111.49    9.50
   3   8  -1  106.69    9.60
  -3   8   1  116.19    8.30
   3   8  -1  106.39    8.60
  -3  -8   1  103.19    7.20
   3   8   1  117.89    8.90
  -3   8  -1  116.29    8.00
   3   8   1  111.89    9.60
  -3   8  -1  116.99    9.80
   3   8   1   77.79   12.90
  -3   8  -1  118.39   22.60
  -4   8   1  106.99    7.70
   4   8  -1  104.19    9.50
  -4   8   1   97.59   13.50
   4  -8   1   99.99    8.20
  -4   8   1  108.79    9.50
   4  -8  -1   92.29    8.50
   4   8   1  106.69    9.70
  -4  -8   1  100.09    7.20
  -4   8  -1  103.99    7.80
  -4   8  -1   96.99    9.10
   5   8  -1   81.29    8.30
  -5   8   1   79.99    6.30
  -5   8   1   55.39   19.30
  -5  -8  -1   79.29    6.00
  -5   8   1   83.19    8.00
   5  -8   1   81.99    6.80
  -5   8  -1   75.89    7.80
  -5   8  -1   50.29   14.90
  -5  -8   1   80.09    6.10
   5   8   1   84.09    8.40
   5  -8  -1   79.49    6.70
  -5   8  -1   82.19    6.30
  -6   8   1   96.49    6.70
   6  -8   1   98.39    7.30
  -6  -8  -1  102.19    6.50
   6   8  -1  105.99    9.10
  -6   8   1  102.39    8.30
  -6  -8   1  105.29    6.60
  -6   8  -1  111.69    8.70
   6  -8  -1   86.89    7.00
   6   8   1   97.49    9.00
  -7   8   1   61.49    5.40
   7  -8   1   60.09    4.90
  -7   8  -1   59.29    5.50
   7  -8  -1   52.79    4.70
  -7  -8   1   55.89    4.50
   8  -8   1   20.20    2.90
   8   8  -1   19.70    3.20
  -8   8  -1   25.90    2.90
   8  -8  -1   20.50    3.40
   8   8   1   14.90    3.00
   0   9  -1    2.20    3.20
   0   9  -1   -2.50    5.50
   0   9   1    4.70    2.10
   0   9  -1    1.30    1.80
   0   9   1    5.60    2.20
   1   9  -1  119.39    9.50
   1   9  -1  117.49    9.60
  -1   9   1  122.39   13.60
  -1   9   1  122.09    9.90
  -1  -9   1  111.49    7.90
   1   9   1  115.59    7.80
  -1   9  -1  112.39    8.30
  -1   9  -1  106.29   14.50
  -1   9  -1  113.49    9.70
   1   9   1  118.19    9.50
  -2   9   1   57.89   11.00
  -2  -9  -1   63.39    5.20
   2   9  -1   65.39    7.40
   2   9  -1   60.09    6.20
  -2   9   1   63.19    5.90
  -2   9   1   61.59    7.10
  -2   9  -1   62.39    7.00
  -2   9  -1   66.89    5.90
  -2   9  -1   43.70   11.50
  -2  -9   1   59.59    5.20
   2   9   1   61.79    6.50
   2   9   1   56.69    7.30
   3   9  -1  197.38   12.60
   3   9  -1  212.58   15.60
  -3  -9  -1  201.58   10.80
  -3   9   1  196.88   13.70
  -3   9   1  177.28   18.40
  -3   9   1  213.28   12.20
   3   9   1  204.68   12.80
   3   9   1  229.28   18.90
  -3   9  -1  197.38   13.80
  -3   9  -1  166.48   20.60
  -3   9  -1  210.28   12.10
  -4  -9  -1  296.37   14.90
  -4   9   1  272.37   17.00
   4   9  -1  332.97   18.30
  -4   9   1  277.87   15.10
  -4  -9   1  295.47   15.10
  -4   9  -1  283.77   17.30
  -4   9  -1  277.17   15.10
   4   9   1  285.17   17.50
  -5   9   1   54.69    6.00
   5   9  -1   56.29    6.60
  -5   9   1   57.39    5.00
  -5  -9  -1   57.09    4.60
   5   9   1   65.49    7.00
  -5  -9   1   58.89    4.80
  -5   9  -1   58.89    6.40
  -6   9   1   19.50    3.30
  -6  -9  -1   19.90    3.80
   6   9  -1   16.00    3.80
  -6  -9   1   15.20    2.40
   6   9   1   18.70    3.80
  -6   9  -1   23.80    3.50
   7   9  -1   40.80    4.40
  -7   9   1   39.10    3.60
  -7   9  -1   35.40    3.90
   7   9   1   27.30    4.10
   0  10   1  656.63   31.00
   0 -10   1  638.04   29.20
   0  10  -1  609.84   30.70
  -1  10   1  336.67   19.50
  -1 -10  -1  357.66   17.40
   1  10  -1  346.87   19.00
  -1  10   1  365.96   17.90
  -1  10  -1  371.26   36.30
   1  10   1  357.66   19.20
  -1 -10   1  346.67   17.40
  -2  10   1  120.79    8.10
   2  10  -1  108.89    8.70
  -2  10   1  114.29    9.40
  -2 -10  -1  131.99    7.70
   2  10  -1  126.99    9.60
  -2  10  -1  112.39    9.40
  -2 -10   1  119.29    7.50
   2  10   1  112.69    8.70
   3  10  -1  294.87   17.20
   3  10  -1  312.27   16.40
  -3  10   1  301.77   17.50
  -3  10   1  314.47   15.60
  -3  10  -1  286.97   17.30
   3  10   1  303.07   17.30
  -3 -10   1  322.07   17.30
  -4  10   1   58.99    5.10
   4  10  -1   68.39    6.70
  -4  10   1   64.09    6.30
  -4 -10  -1   60.49    4.90
   4  10   1   70.99    8.30
  -4 -10   1   77.99    5.40
  -4  10  -1   64.59    6.40
  -5 -10  -1   28.40    3.10
  -5  10   1   31.10    4.10
   5  10  -1   31.40    4.40
  -5 -10   1   26.60    2.80
   5  10   1   20.60    4.00
  -5  10  -1   27.30    3.70
   6 -10   1  245.68   10.80
   6  10  -1  223.28   13.90
  -6  10   1  241.18   11.30
   6  10   1  224.78   12.50
   0 -11  -1    0.30    0.90
   0 -11   1    2.20    1.20
   0  11   1    0.70    1.40
   0  11  -1    0.90    1.40
   1  11  -1  143.09    9.50
   1 -11   1  142.39    8.80
  -1 -11  -1  143.99    8.10
  -1  11   1  149.69   10.00
   1 -11  -1  154.38    9.00
   1  11   1  153.28    9.80
  -1  11  -1  140.19    9.80
  -1 -11   1  153.08   10.80
   2 -11   1   75.29    5.80
   2  11  -1   79.39    6.20
  -2 -11  -1   84.89    6.60
  -2  11   1   74.99    6.50
   2  11   1   80.89    6.40
  -2 -11   1   76.49    5.30
  -2  11  -1   83.79    7.00
  -3  11   1   13.00    2.60
  -3 -11  -1   11.50    2.00
   3 -11   1   10.80    2.20
   3  11  -1    6.50    4.30
  -3  11  -1   17.20    3.00
  -3 -11   1    9.60    1.90
   4  11  -1   33.80    4.20
  -4  11   1   41.40    4.40
   4 -11   1   32.60    3.20
  -4 -11  -1   36.20    3.30
  -4  11  -1   34.20    3.70
  -5  11   1   82.09    5.80
   5 -11   1   78.59    4.50
  -5 -11   1   73.29    4.60
   5 -11  -1   86.89    4.80
  -5  11  -1   82.69    5.10
   0  12   1    0.00    0.90
   0 -12   1    1.20    1.10
   0 -12  -1    1.00    0.90
   0  12  -1    0.90    1.10
   1 -12   1  101.39    5.70
   1  12  -1   73.29    6.60
   1 -12  -1   96.89    5.50
  -1  12  -1  100.99    7.30
  -1 -12   1   84.29    5.00
  -1 -12   1   98.89    6.50
  -2 -12  -1   31.70    2.90
   2 -12   1   31.80    3.00
  -2  12   1   22.80    2.60
  -2 -12   1   26.00    2.70
   2 -12  -1   31.80    2.80
  -2  12  -1   32.10    3.20
   0   0   2   35.20    2.30
   0   0   2   32.00    2.70
  -1   0   2  561.34   23.70
   1   0  -2  561.04   22.90
   1   0   2  605.14   23.80
   1   0   2  544.15   23.60
   2   0   2    7.60    1.60
  -2   0  -2    4.60    1.70
   3   0   2 3660.53  141.19
   3   0  -2 3529.95  139.59
  -3   0  -2 3491.25  142.99
  -3   0   2 3558.24  142.59
   4   0  -2   82.69    6.20
   4   0   2   71.79    6.50
  -4   0  -2   80.99    8.90
   4   0  -2   78.19    5.60
   5   0  -2  136.79    9.90
  -5   0   2  184.78   17.10
   6   0   2    8.10    3.60
   6   0   2    9.70    2.20
  -6   0   2    8.80    6.40
   6   0  -2    8.40    2.90
   6   0  -2    5.30    3.20
   7   0   2  276.17   20.00
  -7   0   2  316.57   25.30
   7   0  -2  309.47   18.50
   7   0  -2  277.67   19.40
   7   0  -2  279.67   18.30
  -7   0   2  290.37   14.40
   7   0  -2  273.97   20.20
   7   0   2  299.27   19.50
   8   0  -2   31.90    4.30
   8   0   2   29.90    4.40
  -8   0   2   19.70    3.40
   9   0  -2  133.39    8.50
  -9   0   2  128.29    8.10
   9   0   2  132.99    8.60
  10   0  -2   86.29    6.70
  10   0   2   86.29    5.60
 -10   0  -2   94.79    6.70
   0   1   2  407.86   16.80
   0   1  -2  417.36   18.10
   0   1   2  370.86   15.70
   2   1  -2  255.27   11.50
   2  -1   2  267.17   12.30
  -2   1   2  257.07   13.10
   2   1   2  280.97   13.70
   2   1   2  254.17   12.50
   2  -1  -2  261.27   11.20
  -2  -1   2  238.28   13.00
  -2   1  -2  267.17   13.70
   2   1   2  233.48   11.70
  -3  -1  -2  231.18   14.30
  -3   1   2  255.87   14.40
   3  -1   2  261.57   13.00
   3   1  -2  250.77   11.90
  -3  -1   2  238.08   14.20
   3   1   2  253.47   13.40
  -3   1  -2  276.37   15.30
   3  -1  -2  261.47   11.90
   3   1   2  246.88   12.40
   4  -1   2  885.21   36.50
   4   1  -2  774.02   36.00
   4   1  -2  828.52   34.90
  -4   1   2  807.32   38.30
  -4  -1  -2  743.43   38.40
   4   1   2  794.12   35.40
   4  -1  -2  813.92   35.00
   4  -1  -2  824.92   34.80
  -4   1  -2  887.11   39.90
   4   1   2  813.92   36.70
  -4  -1   2  788.42   38.30
   5  -1   2  177.08   12.50
  -5   1   2  179.68   14.60
   5   1  -2  183.38   12.10
   5   1  -2  177.18   11.10
   5  -1  -2  217.18   11.80
   5  -1  -2  187.48   11.40
  -5   1  -2  183.28   15.60
  -5  -1   2  211.08   15.70
   5   1   2  179.58   12.80
  -6   1   2  352.76   18.90
   6   1  -2  415.86   21.40
   6   1  -2  437.56   21.80
  -6   1   2  406.76   25.90
   6  -1   2  400.66   22.70
   6  -1   2  369.56   19.20
   6   1  -2  392.26   21.90
  -6  -1   2  442.36   28.10
   6  -1  -2  404.86   22.20
   6  -1  -2  369.46   20.70
   6   1   2  400.36   23.30
   6   1   2  436.36   23.00
  -6  -1   2  326.87   18.40
   6   1   2  379.46   19.10
  -6   1  -2  375.56   32.40
  -7   1   2  532.45   33.30
   7   1  -2  487.85   26.10
   7   1  -2  455.35   25.30
  -7   1   2  483.65   22.00
   7  -1   2  435.16   27.90
   7  -1   2  483.75   23.10
   7  -1  -2  442.66   26.90
   7  -1  -2  469.05   22.90
  -7  -1   2  461.95   21.50
   7   1   2  501.95   23.30
   7   1   2  447.06   27.80
   8  -1   2  131.39    9.10
   8   1  -2  119.79    8.40
  -8   1   2  129.59    8.40
   8   1  -2   99.79   10.50
  -8   1   2  117.29    7.60
   8   1   2  125.79    8.70
   8  -1  -2  125.89    8.60
  -8  -1   2  108.79    7.20
   9  -1   2   51.29    5.10
  -9   1   2   50.89    5.40
   9   1  -2   49.00    4.70
   9   1   2   52.49    6.50
  -9   1  -2   59.09    5.20
   9  -1  -2   58.89    5.30
  -9  -1   2   47.60    4.80
 -10  -1  -2   55.49    5.10
  10  -1   2   58.79    4.30
  10  -1  -2   50.49    5.20
 -10   1  -2   58.89    5.60
   0   2   2  638.24   24.90
   0   2   2  610.64   24.90
   0   2  -2  581.04   24.50
   0   2  -2  608.94   27.20
   0  -2  -2  576.64   23.70
   1   2  -2 1215.28   48.60
   1   2  -2 1067.39   44.80
  -1   2   2 1130.29   45.90
   1   2   2 1177.18   46.00
   1  -2  -2 1091.79   44.50
  -1   2  -2 1149.89   47.80
   1  -2  -2 1063.69   44.00
   2   2  -2 1496.25   60.49
  -2   2   2 1499.25   62.49
   2  -2   2 1560.24   60.89
  -2   2  -2 1558.04   63.99
   2  -2  -2 1528.85   59.99
   2   2   2 1457.35   60.69
   2   2   2 1530.75   61.99
  -2  -2   2 1528.95   63.19
  -3   2   2  130.49    9.20
   3   2  -2  115.19    6.70
   3  -2   2  122.29    7.40
   3  -2  -2  115.29    6.60
  -3   2  -2  124.59    9.70
   3   2   2  120.09    7.20
  -3  -2   2  124.19    9.70
   3  -2  -2  109.29    6.10
   3   2   2  112.29    8.00
   4   2  -2  142.89    8.60
  -4   2   2  169.48   11.90
   4  -2   2  156.38    9.60
   4   2  -2  132.59    9.70
  -4  -2  -2  133.89   13.60
   4   2   2  145.79   10.20
  -4   2  -2  144.89   12.00
   4  -2  -2  143.09    8.50
   4  -2  -2  144.89    8.10
   4   2   2  133.49    8.80
  -4  -2   2  135.29   11.80
   5   2  -2   20.20    3.30
   5   2  -2   13.30    3.40
   5  -2   2   24.30    5.10
   5  -2  -2   13.30    3.30
  -5   2  -2   16.50    5.80
   5  -2  -2   15.90    3.50
   5   2   2   12.00    3.40
   6   2  -2  625.04   31.40
  -6   2   2  603.04   27.00
   6  -2   2  600.14   27.90
  -6   2   2  615.94   34.70
   6  -2   2  637.04   31.30
   6   2  -2  625.74   30.80
   6   2  -2  596.24   29.70
   6   2   2  612.44   29.40
   6   2   2  564.64   31.90
   6  -2  -2  570.24   29.40
  -6   2  -2  624.54   37.30
  -6  -2   2  612.24   36.20
  -6  -2   2  567.84   26.30
   6   2   2  599.34   30.60
  -7   2   2  825.02   35.90
   7   2  -2  758.22   41.30
   7  -2   2  835.72   37.00
   7   2  -2  854.11   40.20
  -7   2   2  840.62   36.60
   7   2  -2  849.81   39.60
   7  -2  -2  812.02   36.70
  -7  -2   2  792.22   35.20
   7   2   2  875.61   40.90
   7   2   2  780.92   42.50
   7   2   2  786.22   35.90
   8  -2   2   97.99    7.90
  -8   2   2  107.49    8.80
   8   2  -2   88.59   11.00
  -8   2   2  116.99   30.50
  -8   2  -2  103.79    7.80
   8  -2  -2  103.19    7.90
   8   2   2   88.49    9.60
   9  -2   2   86.59    6.80
  -9   2   2   95.09    8.10
  -9   2  -2   80.29    6.60
   9  -2  -2   84.99    6.70
  10  -2   2   33.60    3.80
 -10  -2  -2   29.20    3.10
  10  -2  -2   39.50    4.20
 -10   2  -2   34.00    3.50
   0   3  -2  106.19    8.20
   0   3  -2  104.59    5.40
   0   3   2  107.89    5.80
   0   3   2  102.59    6.40
   1   3  -2  221.08   13.10
   1   3  -2  199.38    9.20
  -1   3   2  187.28   10.60
   1   3   2  203.38   10.30
   1   3   2  195.68   10.50
  -1   3  -2  186.58   12.10
   2   3  -2  137.09    7.40
  -2   3   2  162.68    9.70
   2   3   2  146.49    8.90
  -2   3  -2  144.09   10.50
   2   3   2  135.19    7.50
  -3   3   2  794.32   35.00
   3   3  -2  692.43   31.10
   3  -3   2  714.63   30.50
  -3  -3   2  776.62   36.40
   3   3   2  704.03   31.60
   3  -3  -2  736.93   30.80
   3   3   2  719.23   33.40
  -3   3  -2  758.62   36.30
   4   3  -2  339.67   19.00
   4  -3   2  339.57   16.50
  -4   3   2  363.86   20.90
   4   3  -2  342.97   17.20
  -4   3  -2  365.96   22.30
   4   3   2  360.26   19.60
   4   3   2  322.07   17.40
  -4  -3   2  369.26   22.20
   5  -3   2  277.47   15.10
   5   3  -2  273.57   15.60
   5  -3   2  263.07   15.30
  -5   3   2  266.67   15.20
   5   3  -2  296.67   17.60
  -5   3   2  299.17   19.70
   5   3  -2  286.07   16.30
  -5  -3   2  272.57   15.10
  -5   3  -2  310.97   21.50
   5   3   2  276.37   17.90
  -5  -3   2  273.47   21.40
   5   3   2  273.07   17.60
  -6   3   2  103.49    7.60
   6  -3   2  107.39    7.90
  -6   3   2  100.89   13.60
  -6   3   2  110.39    8.30
   6   3  -2   99.29    9.10
   6   3  -2   97.39   10.10
   6   3  -2  106.79    9.40
   6   3   2   95.99   10.90
   6   3   2  114.59    9.60
  -6   3  -2  104.89    8.10
   6  -3  -2  101.29    7.50
  -6  -3   2   96.79    6.70
   7  -3   2  669.23   31.70
  -7   3   2  690.43   30.60
  -7   3   2  723.73   31.90
   7   3  -2  685.53   34.90
  -7   3   2  753.12   45.50
   7   3  -2  704.43   34.30
   7   3   2  619.04   34.30
   7  -3  -2  666.53   31.50
   7   3   2  650.43   37.80
  -7   3  -2  710.43   32.10
  -7  -3   2  665.63   29.80
  -8   3   2  164.68   10.30
   8   3  -2  153.78   12.30
  -8   3   2  134.69    9.30
   8  -3   2  164.28   11.90
  -8  -3   2  147.59    8.90
   8   3   2  139.99   12.40
   8  -3  -2  186.98   13.60
  -8   3  -2  173.78   10.90
   9  -3   2   82.49    6.50
  -9   3   2   81.29    6.40
  -9   3  -2   92.19    6.80
   9  -3  -2   84.29    6.60
  10  -3   2  116.59    6.80
  10  -3  -2  121.69    7.20
 -10   3  -2  112.69    6.60
   0   4   2   29.90    2.90
   0   4   2   37.20    4.00
   0   4  -2   29.40    4.80
   0   4  -2   31.40    2.40
   1   4  -2   39.30    5.40
   1   4  -2   42.10    3.10
  -1   4  -2   41.30    2.90
  -1   4  -2   39.40    5.60
   1   4   2   47.90    4.20
   2   4  -2 1197.68   54.09
  -2   4   2 1183.68   51.49
   2   4  -2 1165.68   47.90
   2   4   2 1205.48   50.39
  -2   4  -2 1140.69   53.49
  -3   4   2   69.39    7.30
   3   4  -2   60.99    4.80
  -3  -4   2   61.99    8.20
   3   4   2   48.90    5.80
   4   4  -2  756.02   33.50
  -4   4   2  760.92   38.20
   4   4  -2  734.63   35.90
   4   4   2  743.63   36.50
  -4  -4   2  741.23   39.80
  -4   4  -2  774.82   40.20
   5   4  -2  115.09   10.40
   5  -4   2  105.79    7.90
  -5   4   2  111.59    8.20
   5   4  -2  121.29    9.20
  -5   4   2  145.89   19.10
  -5   4   2   97.99    7.80
   5   4  -2  111.79    9.40
  -5   4   2   96.29   10.90
  -5   4  -2  113.39    7.30
   5   4   2  123.09    9.70
   5   4   2  118.09   11.00
  -5  -4   2  107.69    7.20
   5  -4  -2  108.79    7.90
  -5   4  -2  124.69   14.70
  -5   4  -2  107.79    8.50
  -6   4   2  139.99    9.20
   6   4  -2  150.68   13.70
  -6   4   2  123.49   14.90
  -6   4   2  142.99    8.80
   6   4  -2  120.69   14.10
  -6   4   2  151.18   10.40
   6  -4   2  136.59   10.40
  -6   4  -2  139.79   13.70
  -6  -4   2  142.29    8.60
   6   4   2  141.29   14.10
  -6   4  -2  134.19   17.20
   6  -4  -2  160.78   11.40
   6   4   2  142.69   11.90
  -7   4   2   75.69    6.80
  -7   4   2   89.39    7.80
   7   4  -2   87.29   12.30
  -7   4   2  104.69   15.90
   7   4  -2   80.19   10.30
   7  -4   2   90.79    7.60
   7   4  -2   83.89    8.80
  -7   4  -2   89.79    7.50
  -7  -4   2   79.29    6.20
   7   4   2   88.89    9.20
   7  -4  -2   90.49    7.40
   7   4   2   59.89   11.80
   8  -4   2   56.49    5.70
  -8   4   2   56.79    6.00
   8   4   2   47.30    6.90
  -8   4  -2   60.39    5.80
  -8  -4   2   54.09    4.80
   8  -4  -2   61.69    5.70
  -9   4   2   27.80    5.50
   9  -4   2   21.30    3.20
   9   4  -2   25.20    4.30
  -9   4  -2   30.50    4.40
   9   4   2   15.10    4.40
   9  -4  -2   27.10    3.50
  10  -4   2   65.79    5.00
  10  -4  -2   63.49    5.20
 -10   4  -2   55.39    5.30
   0   5   2   19.90    3.50
   0   5  -2   18.40    1.90
   0   5  -2   26.30    4.90
   0   5   2   20.40    2.80
   1   5  -2  174.58    8.70
  -1   5   2  176.28   11.90
   1   5  -2  190.88   14.10
  -1   5  -2  173.88    8.20
   1   5   2  183.18   10.70
   1   5   2  168.38   11.40
  -1   5  -2  178.68   13.80
  -1   5  -2  181.68    8.40
  -2   5   2   93.89    8.80
   2   5  -2   82.79    7.40
   2   5  -2   97.39    5.90
   2   5  -2   97.69    9.90
  -2   5  -2   93.09    9.70
   2   5   2   91.59    7.70
  -2   5  -2   84.69    5.10
  -3   5   2  100.39   10.10
   3   5  -2  103.09    7.10
   3   5  -2  108.39    9.10
   3   5   2   97.09    8.90
  -3   5  -2   94.89   11.40
  -4   5   2   36.60    6.50
   4   5  -2   23.40    4.20
  -4   5   2   33.90    5.70
   4   5  -2   30.50    4.70
  -4   5   2   34.50    6.30
  -4   5   2   20.10    4.40
   4   5  -2   31.10    5.60
  -4   5  -2   26.50    8.00
   4   5   2   37.80    5.00
  -4  -5   2   29.60    3.80
  -4   5  -2   29.20    4.60
   4  -5  -2   24.10    3.70
  -5   5   2  132.89    9.30
   5   5  -2  130.59   10.30
  -5   5   2  126.79   14.00
  -5   5   2  137.39    8.80
   5   5  -2  130.29   12.00
   5   5  -2  143.29   11.10
  -5   5   2  127.09   10.20
   5  -5   2  134.79    9.50
  -5  -5  -2  114.59    7.70
   5   5   2  137.79   12.80
   5   5   2  146.99   11.20
  -5   5  -2  126.29    8.30
  -5   5  -2  132.79   10.00
   5  -5  -2  123.49    8.90
  -5   5  -2  127.49   16.70
  -5  -5   2  137.29    8.40
  -6   5   2   44.00   10.50
  -6   5   2   46.70    4.70
   6   5  -2   36.30    6.80
  -6   5   2   39.60    5.90
   6  -5   2   44.40    5.20
   6   5  -2   54.99    6.30
   6   5  -2   37.10    8.30
   6   5   2   38.50    6.10
  -6   5  -2   32.10   12.50
   6  -5  -2   32.20    4.60
  -6  -5   2   39.30    4.40
  -6   5  -2   47.50    5.70
   6   5   2   33.90    8.00
  -7   5   2  138.79    9.60
   7   5  -2  121.29   10.70
   7  -5   2  137.09    9.70
  -7   5   2  160.18   13.30
   7   5   2  110.79   10.80
  -7   5  -2  131.69    9.80
   7  -5  -2  130.09    9.40
  -7  -5   2  124.59    8.70
   8  -5   2    9.50    2.60
  -8   5   2    0.60    2.70
   8   5  -2    6.50    2.90
   8   5   2    4.70    3.40
  -8   5  -2    7.70    2.60
   8  -5  -2    5.50    1.80
  -8  -5   2    1.80    2.50
   9   5  -2    7.50    2.90
   9  -5   2    5.20    1.60
  -9   5  -2    7.20    2.10
   9   5   2    1.70    2.60
   9  -5  -2    6.70    1.90
   0   6  -2   32.90    6.40
   0   6   2   31.50    4.90
   0   6  -2   37.50    4.20
   0   6   2   26.20    3.70
   1   6  -2   34.20    6.80
  -1   6   2   28.80    5.40
   1   6  -2   22.30    2.90
   1   6  -2   35.50    4.60
   1   6   2   29.50    4.60
  -1   6  -2   32.30    6.40
   1   6   2   28.50    4.80
  -2   6   2  166.18   11.50
   2   6  -2  178.38   11.40
  -2   6   2  206.38   11.00
  -2   6   2  206.78   14.70
   2   6  -2  183.38   15.50
   2   6  -2  161.48   11.80
   2   6  -2  175.88    9.90
   2   6  -2  189.98   12.60
  -2   6  -2  169.18   10.40
  -2   6  -2  158.18   11.40
  -2   6  -2  182.08   15.90
   2   6   2  198.08   13.10
   2   6   2  169.28   11.10
   3  -6   2   94.69    7.80
  -3   6   2  100.69    9.00
  -3   6   2  112.39    8.00
   3   6  -2  127.99    9.80
   3   6  -2  119.49    8.30
  -3   6   2  120.59   11.80
   3   6  -2  127.29   10.70
   3   6  -2  116.59    8.50
   3   6   2  125.09    8.70
  -3  -6   2   97.49    7.10
   3   6   2  114.09    9.20
  -3   6  -2  114.59   13.40
  -3   6  -2  117.79    7.90
  -3   6  -2  113.19    9.10
   3   6   2  120.49   11.00
   4   6  -2  143.69   12.50
  -4   6   2  124.79   14.10
   4   6  -2  154.78   10.60
   4   6  -2  147.59    9.90
   4  -6   2  145.69    9.70
   4   6  -2  144.19   10.80
  -4   6   2  143.59    9.10
  -4   6   2  133.29   10.50
  -4  -6   2  149.09    8.90
   4   6   2  142.89   13.50
  -4   6  -2  131.99   10.40
  -4  -6   2  122.49    8.30
   4   6   2  147.79   10.80
  -4   6  -2  124.39   15.20
  -4   6  -2  150.48    9.20
   4  -6  -2  135.09    9.30
  -5   6   2   92.69   13.20
  -5   6   2   89.89    8.70
  -5   6   2   87.89    6.90
   5   6  -2   95.09   11.00
   5   6  -2   84.29    9.70
   5  -6   2   79.99    7.40
   5   6  -2   87.59    8.60
  -5   6  -2   79.09    6.60
   5   6   2   97.79    8.80
  -5   6  -2   84.49    8.20
   5  -6  -2   84.39    7.40
  -5   6  -2  118.19   22.30
  -5  -6   2   88.19    6.50
   5   6   2   97.39   11.90
  -6  -6  -2  273.87   13.90
  -6   6   2  254.37   23.40
  -6   6   2  300.57   14.90
   6   6  -2  245.38   27.00
  -6   6   2  290.77   17.00
   6  -6   2  287.47   16.10
   6   6  -2  306.67   18.20
   6   6   2  235.98   27.30
  -6   6  -2  292.57   17.10
  -6   6  -2  271.27   27.20
   6  -6  -2  276.97   15.70
   6   6   2  287.57   18.20
  -6  -6   2  286.97   14.60
   7   6  -2    7.20    2.90
   7  -6   2   10.10    2.90
  -7   6   2    6.10    2.30
   7   6   2   11.00    3.70
   7  -6  -2    8.30    2.30
  -7   6  -2   12.60    3.40
  -7  -6   2    6.60    1.90
   8  -6   2  128.49    8.30
  -8   6   2  129.89    8.20
   8   6  -2  115.69    9.60
   8  -6  -2  116.39    8.00
   8   6   2  104.89    9.60
  -8  -6   2  114.99    9.30
  -8   6  -2  127.99    8.60
   9  -6   2   77.29    5.50
   9   6  -2   70.29    7.60
   9  -6  -2   78.89    5.40
  -9   6  -2   83.79    5.60
   0   7   2  559.54   27.30
   0   7   2  564.34   25.80
   0   7  -2  594.14   25.80
   0   7  -2  532.05   27.90
   0   7  -2  522.85   27.10
   0   7   2  569.04   30.00
   1   7  -2   36.40    4.90
   1   7  -2   40.70    7.70
   1   7  -2   30.50    5.60
  -1   7   2   35.50    4.10
  -1   7   2   35.10    4.90
  -1   7   2   39.30    6.70
   1   7   2   38.60    4.80
   1   7   2   37.30    4.80
  -1   7  -2   26.70    9.50
  -1   7  -2   31.50    6.70
  -1   7  -2   32.80    4.10
  -1   7  -2   31.00    5.10
  -2   7   2  385.96   24.70
  -2   7   2  404.46   19.60
   2   7  -2  437.16   22.70
   2   7  -2  373.36   21.40
  -2   7   2  380.86   21.00
   2   7  -2  387.56   20.50
  -2   7  -2  405.16   19.50
   2   7   2  393.06   20.40
  -2   7  -2  382.86   21.00
   2   7   2  385.56   20.90
  -2  -7   2  376.36   18.50
  -2   7  -2  361.26   26.70
   2   7   2  393.56   22.60
   3   7  -2   75.69    6.80
  -3   7   2   79.59    7.70
   3   7  -2   76.59    7.40
   3   7  -2   63.89    8.90
  -3   7   2   74.99   10.50
   3  -7   2   54.99    6.30
  -3   7   2   71.89    6.40
  -3   7  -2   64.19    6.00
  -3   7  -2   74.19   11.40
   3   7   2   70.39    7.40
  -3   7  -2   75.19    7.50
  -3  -7   2   67.39    5.40
   3   7   2   71.29   11.70
   3   7   2   76.19    6.80
  -4   7   2  539.55   24.90
  -4   7   2  533.25   27.20
   4  -7   2  497.45   25.00
   4   7  -2  545.35   30.80
  -4   7   2  496.75   32.30
   4   7  -2  518.05   27.30
   4   7   2  516.95   31.20
   4   7   2  522.85   27.30
  -4   7  -2  550.84   24.90
  -4   7  -2  496.85   26.70
  -4   7  -2  507.85   35.20
  -4  -7   2  528.35   24.40
  -5   7   2   54.29    5.50
  -5   7   2   58.89    6.90
  -5  -7  -2   56.99    5.10
   5   7  -2   45.50    9.90
   5  -7   2   63.89    6.30
   5   7  -2   59.19    7.00
  -5   7  -2   55.79    6.70
  -5   7  -2   61.49    5.40
   5   7   2   58.39   12.90
   5   7   2   61.69    7.30
   5  -7  -2   60.69    6.00
  -5  -7   2   48.30    4.90
  -6  -7  -2  144.49    8.50
   6  -7   2  143.99   10.10
  -6   7   2  155.08   11.00
  -6   7   2  123.69   18.40
   6   7  -2  162.38   11.90
  -6   7   2  142.29    8.90
  -6   7  -2  147.39   11.10
  -6  -7   2  150.28    9.00
   6   7   2  145.49   11.90
   6  -7  -2  145.19    9.80
   7  -7   2  207.78   12.00
   7   7  -2  193.88   13.30
  -7   7   2  199.88   11.80
  -7  -7   2  197.88   10.30
  -7   7  -2  204.98   12.50
   7   7   2  184.88   13.50
   7  -7  -2  196.18   11.60
   8   7  -2  142.09   10.20
   8  -7   2  161.88    9.00
  -8   7   2  143.59    8.20
   8   7   2  131.39   10.20
  -8   7  -2  168.18    9.30
   8  -7  -2  161.58    8.90
   0   8  -2  184.38   13.40
   0   8  -2  209.78   11.70
   0   8  -2  178.98   19.40
   0   8   2  197.68   11.60
  -1   8   2  112.59   10.90
  -1   8   2  123.19   11.90
   1   8  -2  103.79    9.50
   1   8  -2  127.19   10.90
  -1   8  -2  108.99    9.60
  -1   8  -2  150.58   21.40
   1   8   2  129.39    8.00
   1   8   2  118.99    9.60
   1   8   2  116.09   10.00
  -1   8  -2   97.09    9.90
  -1   8  -2  128.79   10.50
   2   8  -2   73.99    7.10
  -2   8   2   63.79    7.10
  -2   8   2   66.29    6.30
   2   8  -2   63.19    7.20
  -2   8   2   55.49    9.60
  -2  -8   2   69.49    5.60
  -2   8  -2   76.09    6.50
   2   8   2   70.09    6.80
  -2   8  -2   63.99    7.10
  -2   8  -2   70.49   12.20
   2   8   2   81.79   11.10
   3   8  -2  440.46   24.20
  -3   8   2  461.95   24.30
   3   8  -2  447.56   27.50
  -3   8   2  496.35   40.00
   3   8  -2  445.56   22.80
  -3   8   2  435.06   21.90
  -3   8  -2  420.46   24.00
  -3   8  -2  463.15   22.00
   3   8   2  428.16   23.80
  -3  -8   2  430.86   20.70
   3   8   2  436.36   28.20
   3   8   2  453.05   22.90
   4   8  -2  408.16   22.10
   4   8  -2  362.96   27.30
   4  -8   2  347.67   19.10
  -4   8   2  395.76   21.80
  -4   8   2  388.36   19.40
  -4   8   2  339.57   26.00
  -4   8  -2  389.46   21.80
  -4   8  -2  361.36   30.50
  -4  -8   2  382.66   18.00
  -4  -8   2  396.46   19.10
   4   8   2  412.96   22.30
  -4   8  -2  425.46   19.70
   4   8   2  348.47   28.20
   5   8  -2   18.70    4.20
  -5   8   2   20.30    4.10
   5  -8   2   14.60    3.50
  -5   8   2   18.60    3.30
  -5   8   2    9.40    8.30
  -5  -8  -2   13.50    2.60
   5   8   2   16.30    4.40
  -5  -8   2   16.70    3.00
  -5   8  -2   23.60    4.70
   5  -8  -2   14.20    3.20
  -5   8  -2   16.60   13.00
  -6   8   2  116.49    8.80
  -6  -8  -2  102.39    6.80
  -6   8   2  107.19    7.10
   6   8  -2  114.59    9.60
   6  -8   2  118.99    7.90
  -6  -8   2  116.99    7.10
   6  -8  -2  111.89    7.80
  -6   8  -2  110.69    8.80
   6   8   2  106.89    9.50
  -7   8   2   49.50    6.20
   7  -8   2   53.19    4.40
   7  -8   2   45.50    3.80
   7   8  -2   58.19    6.40
  -7   8  -2   60.19    5.50
   7   8   2   46.80    6.00
  -7  -8   2   40.40    4.10
   8  -8   2   14.10    2.60
   8   8  -2   16.40    3.50
  -8   8  -2   12.60    2.30
   8   8   2   11.80    2.90
   0   9   2  334.57   19.50
   0   9  -2  357.66   19.90
   0   9   2  378.56   18.00
   0   9  -2  331.67   19.50
   1   9  -2  542.05   27.30
  -1   9   2  488.75   29.60
  -1   9   2  555.94   25.60
  -1   9   2  568.54   27.90
   1   9  -2  559.94   27.90
   1   9   2  548.95   24.70
   1   9   2  548.75   27.20
  -1   9  -2  550.74   28.00
  -1   9  -2  483.15   34.50
  -1  -9   2  543.35   25.20
  -2   9   2   12.60    3.00
  -2   9   2   15.70    5.90
  -2  -9  -2    8.20    2.20
  -2   9   2   15.60    4.10
   2   9  -2   11.20    3.10
   2   9  -2   12.60    3.40
  -2  -9   2    6.60    1.90
  -2   9  -2    6.00    8.80
   2   9   2    6.90    2.20
   2   9   2   16.70    4.40
  -2   9  -2   10.30    3.40
  -2   9  -2    9.10    2.50
  -3   9   2  265.57   15.10
  -3   9   2  287.47   18.70
  -3   9   2  243.48   22.50
   3   9  -2  307.57   17.40
   3   9  -2  253.27   22.20
  -3  -9   2  278.17   15.10
  -3   9  -2  300.97   17.80
   3   9   2  294.37   16.30
   3   9   2  288.97   21.60
   4   9  -2  209.68   13.70
  -4  -9  -2  199.08   11.20
  -4   9   2  195.68   11.60
  -4   9   2  206.98   13.50
  -4  -9   2  194.68   10.60
  -4   9  -2  198.08   13.70
   4   9   2  206.58   14.10
  -4  -9   2  212.68   11.60
  -5   9   2   44.10    5.10
  -5  -9  -2   40.40    3.90
   5   9  -2   47.80    5.80
  -5   9   2   43.20    4.10
   5   9   2   45.50    5.90
  -5  -9   2   44.30    4.20
  -5   9  -2   43.00    5.30
   6  -9   2    0.50    1.00
   6   9  -2   -1.50    1.60
  -6   9   2    1.40    2.00
  -6   9  -2    4.00    2.00
   6   9   2   -1.00    1.80
   7   9  -2  103.59    7.50
   7   9   2   99.99    7.40
  -7   9  -2  120.79    7.80
   0  10   2   37.50    4.30
   0  10   2   40.10    5.30
   0  10  -2   40.40    5.10
   0 -10   2   38.20    4.20
  -1 -10  -2  216.58   11.90
   1 -10   2  211.68   12.60
  -1  10   2  229.18   12.40
   1  10  -2  236.68   13.90
   1  10  -2  212.88   13.60
  -1  10   2  235.28   14.30
  -1  10  -2  223.08   14.20
   1  10   2  213.78   13.50
  -1 -10   2  209.88   11.90
   2  10  -2  144.69   10.70
  -2  10   2  141.79   10.40
  -2  10   2  138.69    9.10
   2  10  -2  132.79    9.60
  -2 -10  -2  147.49    8.20
   2  10   2  129.29    9.60
  -2 -10   2  144.99    8.70
  -2  10  -2  151.88   10.90
  -3  10   2   55.99    6.10
   3  10  -2   63.49    6.40
   3  10  -2   54.69    5.40
  -3  10   2   55.99    5.10
  -3  10  -2   52.79    6.00
   3  10   2   60.29    7.70
  -3 -10   2   57.39    4.60
  -3 -10   2   53.69    4.80
  -4 -10  -2    2.30    1.50
   4  10  -2    3.80    2.10
  -4  10   2    0.50    1.70
  -4  10   2    1.60    1.30
  -4 -10   2    1.50    1.30
   4  10   2   -1.50    2.50
  -4  10  -2    3.90    1.70
   5 -10   2   26.70    2.80
   5  10  -2   27.00    3.90
  -5 -10  -2   29.20    3.40
  -5  10   2   29.40    3.70
  -5  10  -2   32.50    3.80
   5  10   2   18.50    4.50
  -5 -10   2   27.60    2.90
   6 -10   2  100.29    5.10
   6  10  -2   97.39    7.60
  -6  10  -2   98.59    6.90
   6  10   2   95.69    6.60
  -6 -10   2   90.69    5.00
   0 -11   2   20.40    2.80
   0 -11  -2   22.10    3.50
   0  11  -2   19.80    3.40
   0  11   2   22.50    3.50
  -1 -11  -2   66.09    4.80
   1  11  -2   68.39    5.80
  -1  11   2   70.79    6.10
   1 -11   2   63.29    5.20
  -1 -11   2   70.69    5.90
  -1  11  -2   68.39    6.20
   1  11   2   63.39    5.60
   1 -11  -2   61.09    5.10
   2 -11   2   13.60    2.40
   2  11  -2   17.30    2.90
  -2  11   2   12.30    3.90
   2  11  -2   21.70    4.70
  -2 -11   2   12.90    2.30
  -2  11  -2   11.40    2.90
  -2 -11   2   13.70    2.40
  -3 -11  -2   14.70    2.20
   3  11  -2   15.10    3.00
  -3  11   2   13.00    2.50
   3 -11   2   18.20    2.70
  -3  11  -2   16.10    3.10
  -3 -11   2   16.50    2.40
  -4  11   2  107.79    6.70
   4 -11   2  117.99    6.70
   4  11  -2  105.19    6.90
  -4 -11  -2   93.79    5.30
  -4 -11   2   86.19    6.30
  -4  11  -2  101.99    7.00
   0 -12   2    7.30    1.40
   0 -12  -2    5.40    1.30
   0  12  -2   11.80    3.00
   0  12   2    4.10    1.50
  -1  12   2   20.30    2.60
   1 -12   2   21.00    2.50
   1  12  -2   22.00    2.90
  -1 -12   2   15.60    2.50
  -1  12  -2   21.60    3.20
  -1 -12   2   20.20    2.20
   1 -12  -2   18.60    2.40
   2 -12   2   34.50    2.90
  -2 -12  -2   29.30    2.60
  -2  12   2   30.90    3.20
  -2  12  -2   32.60    3.30
   2 -12  -2   33.70    3.30
  -2 -12   2   35.10    2.90
   0   0   3   -0.20    0.60
   0   0   3    0.40    0.50
   1   0  -3  317.37   13.90
   1   0   3  335.67   15.00
  -1   0   3  334.07   16.50
   1   0   3  313.67   14.40
   2   0   3  281.07   13.40
   2   0   3  268.67   13.80
   2   0  -3  265.47   12.00
  -2   0   3  260.27   13.50
   3   0  -3 3286.27  131.59
  -3   0  -3 3173.88  137.59
   3   0   3 3519.55  133.89
  -3   0   3 3428.86  134.79
  -4   0  -3  580.54   31.30
  -4   0   3  636.74   30.70
   4   0   3  630.04   29.30
   4   0  -3  620.94   27.10
  -5   0   3  886.91   42.40
   5   0  -3  819.62   38.20
   5   0  -3  845.42   37.50
   5   0   3  857.31   40.00
   6   0  -3   58.59    6.80
   6   0   3   43.80    7.60
  -6   0   3   47.20    4.50
  -6   0   3   66.29   10.30
   6   0   3   52.39    8.00
   6   0  -3   54.59    6.40
   6   0   3   58.89    5.60
   7   0  -3  744.93   35.50
   7   0  -3  591.64   35.60
   7   0   3  727.03   32.70
  -7   0   3  775.92   43.20
   8   0   3    9.10    3.20
   8   0  -3   11.00    2.80
   9   0  -3   86.69    6.50
   9   0   3   80.09    6.30
 -10   0  -3    0.10    1.40
  10   0  -3   -0.70    1.90
   1   1  -3 1793.92   69.89
   1  -1   3 1793.82   67.79
  -1   1   3 1614.04   67.09
   1   1  -3 1662.63   66.79
   1  -1  -3 1635.64   66.29
   1   1   3 1603.54   66.19
   1   1   3 1732.13   67.89
   2  -1   3 1547.35   61.09
   2   1  -3 1438.06   59.69
  -2   1   3 1447.96   61.29
  -2  -1   3 1483.85   61.89
   2   1   3 1578.54   61.49
  -2   1  -3 1535.45   62.69
   2   1   3 1467.95   60.79
   2  -1  -3 1497.25   59.39
  -3   1   3 2863.31  116.39
   3  -1   3 2968.00  115.39
   3   1  -3 2844.92  113.49
  -3  -1   3 2738.63  116.49
   3   1   3 2986.40  115.89
  -3   1  -3 2988.60  117.99
   3   1   3 2794.82  116.29
   3  -1  -3 2844.92  113.39
   4  -1   3   74.69    6.80
   4   1  -3   73.49    5.50
  -4  -1  -3   68.39   10.00
   4   1   3   77.79    7.10
  -4   1  -3   78.29    8.50
   4  -1  -3   78.79    5.60
  -4  -1   3   84.29    8.40
   5  -1   3   17.80    4.30
   5   1  -3   22.10    4.00
   5   1  -3   23.80    3.90
  -5   1   3   30.20    6.90
  -5   1  -3   19.30    7.60
  -5  -1   3   24.80    6.60
   5   1   3   31.40    5.30
   5  -1  -3   19.30    3.40
   5  -1  -3   25.10    3.80
  -6   1   3  683.13   36.10
  -6   1   3  590.34   27.50
   6   1  -3  618.04   30.50
   6  -1   3  582.04   32.20
   6  -1   3  598.74   28.70
   6   1  -3  637.54   30.70
   6   1  -3  638.74   31.80
   6   1   3  664.63   32.80
  -6  -1   3  623.74   27.50
   6  -1  -3  591.54   30.10
  -6  -1   3  739.13   38.50
   6   1   3  625.34   33.30
   6  -1  -3  634.14   31.80
  -7   1   3   84.59    6.30
  -7   1   3   85.99   17.60
   7   1  -3   61.19    8.20
   7  -1   3   88.09    7.10
   7   1  -3   90.69    9.40
   7   1  -3   72.29   10.10
  -7  -1   3   78.19    6.30
   7  -1  -3   80.39    8.90
   7   1   3   91.39   11.30
   7   1   3   74.39    8.90
   7  -1  -3   53.09   12.10
  -7  -1   3   63.59   15.30
  -8   1   3   45.80    5.80
   8  -1   3   58.09    5.80
  -8   1   3   43.30    4.80
   8   1  -3   52.69    5.10
  -8   1   3   32.50   18.00
   8  -1  -3   59.09    5.40
   8   1   3   55.39    5.30
  -8  -1   3   47.00    4.70
   8   1   3   14.60   19.10
   9   1  -3    0.30    1.50
   9  -1   3    0.80    1.40
  -9   1   3    2.40    3.30
  -9   1  -3    2.10    1.40
   9  -1  -3    1.80    1.60
   9   1   3   -1.30    2.20
  -9  -1   3   -0.90    2.50
  10  -1   3   49.40    5.00
 -10  -1  -3   54.79    5.00
 -10   1  -3   61.69    5.30
  10  -1  -3   49.00    4.40
   0   2  -3 1994.60   83.79
   0   2  -3 2194.98   87.29
   0   2   3 2137.49   84.39
   0   2   3 2196.88   83.19
   1   2  -3  242.18   11.50
   1   2  -3  273.27   15.00
  -1   2   3  251.67   11.90
   1  -2  -3  249.38   10.70
   1   2   3  259.17   12.60
  -1   2  -3  260.47   14.20
  -2   2   3  965.80   40.40
   2  -2   3  997.10   39.70
   2   2  -3  897.31   38.60
   2   2   3  838.32   43.80
  -2   2  -3 1017.50   42.70
   2  -2  -3  968.20   38.00
   3  -2   3   28.80    3.70
   3   2  -3   22.50    2.70
  -3   2   3   26.80    4.00
   3   2   3   25.50    3.70
  -3   2  -3   30.90    6.00
  -3  -2   3   30.30    4.60
   4   2  -3  996.20   42.90
  -4   2   3 1032.70   46.80
   4  -2   3 1013.10   44.40
   4   2   3 1030.00   45.80
   4  -2  -3 1068.59   42.90
  -4   2  -3 1027.40   48.70
   4  -2  -3  972.00   42.20
  -4  -2   3 1012.50   47.50
   5   2  -3  278.77   14.80
   5  -2   3  262.57   16.00
   5  -2   3  242.78   13.60
   5   2  -3  260.07   16.00
  -5   2   3  261.97   18.00
   5  -2  -3  245.98   13.80
   5  -2  -3  269.17   14.40
   5   2   3  255.77   16.80
   5   2   3  257.87   16.00
  -5   2  -3  246.08   18.80
   6  -2   3  500.35   24.10
   6   2  -3  538.85   28.50
   6  -2   3  432.36   32.80
   6   2  -3  540.35   26.10
  -6   2   3  486.65   23.00
   6   2  -3  536.25   26.70
  -6   2   3  489.75   25.00
  -6   2   3  558.24   39.20
  -6  -2   3  487.35   22.60
   6  -2  -3  469.55   27.50
   6   2   3  531.25   27.40
   6  -2  -3  490.25   25.30
  -6  -2   3  543.35   32.90
   6   2   3  441.46   33.60
   7   2  -3    7.40    4.20
   7   2  -3    0.30    3.10
   7  -2   3    7.10    2.10
  -7   2   3   12.30    8.50
   7   2  -3    3.50    4.00
   7   2  -3    4.80    2.00
  -7   2   3    7.10    2.40
  -7  -2   3   11.90    2.40
   7   2   3    5.40    5.00
   7  -2  -3    5.80    2.20
   7   2   3    7.50    4.10
   8  -2   3  173.88   11.10
   8   2  -3  156.98   14.90
   8   2  -3  178.38   10.60
  -8   2   3  171.78   10.70
  -8   2   3  162.98   11.70
   8   2   3  129.99   13.30
   8  -2  -3  185.68   11.00
  -8  -2   3  161.98   10.30
   9  -2   3   36.80    4.20
  -9  -2   3   27.70    4.90
  -9   2  -3   41.10    4.30
   9  -2  -3   39.30    4.20
 -10  -2  -3    4.30    1.50
  10  -2   3    0.80    1.20
 -10   2  -3    2.50    1.70
  10  -2  -3   -1.10    1.30
   0   3  -3 1910.31   77.29
   0   3  -3 1731.43   72.39
   0  -3  -3 1720.83   70.99
   0   3   3 1915.01   72.99
   0  -3  -3 1823.42   71.09
   0   3   3 1873.31   73.09
   1   3  -3   18.50    2.00
   1   3  -3   21.40    4.00
   1   3   3   25.90    3.00
  -1   3  -3   16.20    3.50
  -2   3   3  561.14   25.50
   2   3  -3  568.14   28.80
   2   3  -3  527.35   23.40
   2  -3  -3  537.55   22.40
  -2   3  -3  544.15   27.90
   2   3   3  555.64   25.40
  -3   3   3  186.28   12.20
   3   3  -3  179.98    9.50
   3  -3   3  176.68    9.60
   3  -3  -3  177.28    9.00
  -3   3  -3  181.88   13.60
  -3  -3   3  162.58   12.50
   3   3   3  171.88   11.40
  -4   3   3  295.57   18.10
   4   3  -3  285.17   14.70
   4  -3   3  275.97   14.80
  -4   3  -3  286.17   19.80
  -4  -3   3  279.47   19.00
   4  -3  -3  282.37   14.30
   4   3   3  284.17   17.20
   5   3  -3  304.87   17.50
   5   3  -3  332.97   19.30
   5   3  -3  317.47   17.10
  -5   3   3  304.77   15.60
  -5   3   3  337.57   21.30
   5  -3   3  307.57   17.20
   5  -3   3  285.87   16.20
   5  -3  -3  305.77   16.60
  -5   3  -3  322.47   23.20
  -5  -3   3  293.67   15.10
   5   3   3  343.77   19.20
   5   3   3  312.17   19.90
  -6   3   3  188.68   16.90
   6  -3   3  198.78   12.20
  -6   3   3  183.88   12.20
   6   3  -3  212.18   15.60
   6   3  -3  202.38   13.70
   6   3  -3  214.78   13.70
  -6   3   3  208.18   11.60
  -6   3  -3  210.18   12.50
   6   3   3  207.48   14.40
  -6  -3   3  197.18   11.00
   6   3   3  201.68   16.40
  -6   3  -3  175.58   22.10
  -7   3   3  154.38   10.40
  -7   3   3  151.18    9.60
   7   3  -3  158.38   13.10
   7  -3   3  161.38   10.60
  -7   3   3  148.59   22.90
   7   3  -3  137.89   14.30
   7   3  -3  164.78   12.40
  -7  -3   3  149.49    9.00
   7   3   3  159.78   15.80
   7   3   3  144.69   12.40
  -7   3  -3  155.78   10.50
   7  -3  -3  159.98   10.50
  -8   3   3   86.79   29.80
   8   3  -3   83.79    8.20
   8  -3   3   97.99    7.50
  -8   3   3   80.69    7.10
  -8   3   3   80.09    6.50
   8  -3  -3   90.59    7.20
   8   3   3   71.29    8.70
  -8  -3   3   80.89    6.10
  -8   3  -3   99.19    7.50
   9  -3   3  104.19    7.50
   9  -3  -3  106.89    7.50
  -9   3  -3  102.39    7.30
  10  -3   3    2.00    1.20
  10  -3  -3    3.60    1.30
 -10   3  -3    2.40    2.10
   0   4  -3  218.58   14.90
   0   4   3  223.58   11.10
   0   4  -3  214.78   10.30
  -1   4   3 1467.55   60.79
   1   4  -3 1493.65   64.99
   1   4  -3 1457.25   58.59
  -1   4  -3 1320.77   58.39
  -1   4  -3 1409.36   64.39
   1   4   3 1617.24   60.99
   2   4  -3  383.56   17.80
   2   4  -3  393.26   23.50
  -2   4   3  410.46   20.60
   2   4   3  409.16   20.30
  -2   4  -3  384.66   23.10
   3   4  -3  167.28    9.40
  -3   4   3  167.48   12.10
   3   4   3  169.88   11.70
  -3   4  -3  171.48   14.20
  -3  -4   3  164.78   13.50
   4   4  -3  673.13   33.30
  -4   4   3  650.13   34.10
   4   4  -3  735.13   38.60
   4  -4   3  668.93   31.80
   4   4  -3  736.53   35.00
  -4   4   3  762.22   36.70
  -4   4  -3  722.13   39.40
  -4  -4   3  744.03   38.90
  -4   4  -3  661.33   32.00
   4   4   3  734.93   33.70
  -4  -4   3  739.73   33.20
   4   4   3  713.93   35.40
  -5   4   3   25.20    6.70
   5   4  -3   21.40    4.30
   5   4  -3   15.50    4.10
  -5   4   3   25.40    3.80
   5   4  -3   16.40    4.00
  -5   4   3   18.00    3.10
   5  -4   3   21.10    3.50
  -5   4  -3   11.40    2.70
   5   4   3   19.40    4.40
   5   4   3   17.40    5.20
  -5  -4   3   20.50    3.20
  -5   4  -3   22.70    4.10
  -5   4  -3   17.70    8.60
  -6   4   3   77.09    7.50
   6  -4   3   72.59    6.60
   6   4  -3   64.89    9.20
   6   4  -3   66.19    7.40
  -6   4   3  101.99   17.20
   6   4  -3   64.19    8.00
  -6   4   3   65.99    5.80
   6   4   3   56.39   10.00
   6  -4  -3   72.39    6.30
   6   4   3   66.49    7.80
  -6   4  -3   66.29    6.70
  -7   4   3  517.65   25.30
   7  -4   3  540.85   25.80
   7   4  -3  580.84   39.40
   7   4  -3  488.85   32.70
   7   4  -3  477.45   26.90
  -7   4   3  509.25   24.40
   7   4   3  541.15   28.90
  -7   4  -3  545.85   26.00
  -7  -4   3  481.45   23.40
   7  -4  -3  524.15   25.20
   8  -4   3   41.10    4.70
  -8   4   3   42.70    5.60
   8   4  -3   31.50    5.80
   8  -4  -3   42.10    4.90
  -8  -4   3   38.00    4.00
  -8   4  -3   46.50    5.00
   8   4   3   39.50    6.20
   9  -4   3  128.59    8.50
   9  -4  -3  122.09    8.30
  -9   4  -3  125.09    8.40
  10  -4   3    9.00    1.70
 -10   4  -3    5.30    1.80
  10  -4  -3    6.50    1.60
   0   5  -3    5.80    1.40
   0   5   3    5.80    1.90
   0   5   3    5.40    2.30
   0   5  -3    6.30    3.80
   1   5  -3  381.96   17.50
   1   5  -3  418.06   24.40
  -1   5   3  397.76   20.50
   1   5   3  417.66   19.80
  -1   5  -3  380.96   17.30
  -1   5  -3  371.96   23.60
   2   5  -3  446.36   27.10
  -2   5   3  442.36   23.70
   2   5  -3  469.25   20.40
  -2   5  -3  411.86   19.80
   2   5   3  478.25   23.50
  -2   5  -3  454.75   27.40
   3   5  -3  122.89   11.80
   3   5  -3  124.49    9.80
  -3   5   3  123.29   11.00
  -3   5   3  114.29    8.00
  -3   5   3  113.89    8.70
   3   5  -3  137.39    8.30
  -3   5  -3  115.69    8.90
   3   5   3  118.29    8.60
  -3   5  -3  138.09   13.40
  -3  -5   3  140.29   13.60
   3   5   3  143.39   11.40
   4   5  -3  310.37   18.80
   4   5  -3  277.97   17.00
  -4   5   3  292.17   15.60
   4   5  -3  304.27   16.00
  -4   5   3  296.07   15.00
  -4   5   3  272.87   16.50
   4  -5   3  270.77   15.40
  -4  -5   3  292.77   14.60
  -4   5  -3  280.57   16.20
  -4  -5   3  316.87   16.60
   4   5   3  278.67   19.10
  -4   5  -3  276.97   22.00
  -4   5  -3  270.77   14.60
   4   5   3  309.37   17.30
   5   5  -3  626.04   30.80
  -5   5   3  644.64   35.90
   5   5  -3  588.84   29.90
  -5   5   3  627.04   28.80
  -5   5   3  620.34   29.90
  -5   5   3  632.24   28.00
   5   5  -3  638.64   33.20
   5  -5   3  612.54   29.10
   5   5   3  601.54   34.30
   5  -5  -3  595.44   28.50
  -5   5  -3  590.74   27.50
   5   5   3  604.04   31.10
  -5   5  -3  637.44   39.80
  -5   5  -3  613.64   29.80
  -5  -5   3  595.44   27.40
  -6   5   3  259.87   15.60
   6  -5   3  254.47   15.00
  -6   5   3  252.87   13.60
   6   5  -3  238.48   16.90
   6   5  -3  266.97   16.60
  -6   5   3  245.68   14.30
   6   5  -3  258.97   19.30
  -6   5  -3  283.87   28.00
   6   5   3  273.07   17.50
   6  -5  -3  256.97   14.60
  -6  -5   3  254.57   13.50
   6   5   3  232.38   20.00
  -6   5  -3  254.27   15.50
  -7   5   3  187.08   25.90
  -7   5   3  205.98   13.50
   7   5  -3  202.58   15.70
  -7   5   3  213.18   11.00
   7  -5   3  208.18   13.10
   7  -5  -3  202.88   12.60
  -7  -5   3  163.68   12.80
   7   5   3  208.78   15.10
   8  -5   3  328.87   16.70
   8   5  -3  267.67   17.60
  -8   5   3  317.47   16.00
  -8   5  -3  335.67   17.10
   8  -5  -3  326.97   16.60
  -8  -5   3  317.67   15.00
   8   5   3  282.47   18.60
   9  -5   3  104.19    6.90
   9   5  -3   94.09    7.70
  -9   5  -3  102.89    6.80
   9  -5  -3  119.59    7.30
   0   6   3    7.30    2.40
   0   6   3    7.10    3.10
   0   6  -3    5.10    2.10
   0   6  -3    9.50    4.70
   0   6  -3    6.80    1.70
   1   6  -3  644.24   26.70
   1   6  -3  652.43   35.80
   1   6  -3  638.74   30.00
  -1   6   3  688.83   29.40
  -1   6   3  642.74   31.20
   1   6   3  622.94   29.30
   1   6   3  576.34   29.70
  -1   6  -3  607.94   35.30
  -1   6  -3  592.64   27.80
  -1   6  -3  573.64   29.40
  -2   6   3  361.76   19.60
   2   6  -3  346.97   19.00
   2   6  -3  375.66   17.80
   2   6  -3  380.46   25.50
  -2   6   3  400.16   22.40
   2   6  -3  340.07   20.20
   2   6  -3  396.96   21.80
  -2   6  -3  356.26   22.90
   2   6   3  377.26   20.30
  -2   6  -3  376.86   22.40
  -2   6  -3  378.66   25.70
  -2  -6   3  345.07   17.40
   2   6   3  419.16   21.60
   3   6  -3  302.17   18.50
   3  -6   3  286.57   16.60
  -3   6   3  317.07   17.90
   3   6  -3  354.26   20.20
  -3   6   3  320.87   16.40
   3   6  -3  318.57   17.00
  -3   6   3  333.27   21.30
   3   6   3  333.37   18.30
   3   6   3  334.87   17.30
  -3   6  -3  315.67   16.30
  -3   6  -3  301.47   17.70
  -3   6  -3  292.17   23.40
   3   6   3  328.17   20.40
   4   6  -3  156.88   11.10
  -4   6   3  146.29   11.10
  -4   6   3  161.58    9.90
   4   6  -3  150.58   11.60
  -4   6   3  167.88   15.00
   4  -6   3  149.19   10.10
   4   6  -3  157.68   13.20
  -4  -6   3  160.88    9.50
  -4   6  -3  144.49   16.50
   4   6   3  172.18   12.10
  -4   6  -3  154.88    9.60
  -4  -6   3  148.09    9.00
  -4   6  -3  148.29   11.00
   4  -6  -3  151.58    9.90
   4   6   3  155.78   14.40
  -5   6   3   84.49    8.00
   5  -6   3   83.49    7.30
   5   6  -3   64.59    9.60
   5   6  -3   77.09    8.10
  -5   6   3   79.49    6.30
  -5   6   3   60.49   11.40
   5   6  -3   67.89    8.80
   5   6   3   74.69    8.30
  -5   6  -3   76.39   15.80
   5  -6  -3   74.09    6.50
  -5   6  -3   75.49    6.10
  -5   6  -3   73.89    7.40
   5   6   3   64.29   11.20
  -5  -6   3   76.99    6.10
   6  -6   3  204.78   12.90
   6   6  -3  237.38   15.10
   6   6  -3  182.88   15.60
   6   6  -3  197.78   18.10
  -6   6   3  213.68   11.80
  -6   6   3  197.98   20.20
  -6   6   3  223.18   13.80
  -6   6  -3  218.78   13.90
   6   6   3  173.38   18.60
   6  -6  -3  213.58   12.70
  -6   6  -3  176.08   26.30
  -6  -6   3  209.98   11.60
   6   6   3  204.28   15.00
   7   6  -3  309.87   19.00
  -7   6   3  337.97   15.70
   7  -6   3  329.07   17.50
  -7   6   3  336.67   17.40
   7  -6  -3  313.17   17.00
  -7   6  -3  334.87   18.20
  -7  -6   3  317.87   15.70
   7   6   3  309.87   19.70
   8   6  -3   12.10    3.50
   8  -6   3   20.60    3.00
   8   6   3   19.80    4.30
  -8  -6   3   17.10    2.80
   8  -6  -3   19.90    3.10
  -8   6  -3   18.20    3.50
   9  -6   3   26.30    2.80
   9   6  -3   19.10    3.50
   9  -6  -3   27.20    3.00
  -9   6  -3   23.80    3.80
   0   7   3   28.30    3.70
   0   7  -3   38.20    4.30
   0   7  -3   30.70    5.20
   0   7   3   34.80    4.70
   0   7   3   37.60    5.60
   0   7  -3   33.10    5.00
  -1   7   3   57.69    5.40
  -1   7   3   62.99    7.60
  -1   7   3   61.29    6.50
   1   7  -3   56.99    7.30
   1   7  -3   57.29    6.70
   1   7  -3   53.29    6.10
   1   7  -3   74.59   10.60
  -1   7  -3   56.59   12.60
  -1   7  -3   59.09    6.50
   1   7   3   66.39    6.50
   1   7   3   50.99    8.80
  -1   7  -3   70.99    5.60
  -1  -7   3   55.49    5.20
   2   7  -3  234.08   14.20
   2   7  -3  224.38   15.20
   2   7  -3  250.57   16.30
  -2   7   3  239.78   13.30
  -2   7   3  234.98   14.70
  -2   7   3  234.88   17.00
   2   7   3  239.88   16.10
   2   7   3  237.18   14.10
  -2   7  -3  221.08   14.60
  -2  -7   3  226.58   12.30
   2   7   3  225.08   14.40
  -2   7  -3  223.18   20.20
  -2   7  -3  249.78   13.30
  -3   7   3  197.98   12.50
   3   7  -3  194.58   13.80
   3  -7   3  180.08   11.40
   3   7  -3  202.28   15.40
  -3   7   3  193.88   13.00
   3   7  -3  198.48   12.00
  -3   7   3  197.68   17.30
   3   7   3  153.38   12.70
   3   7   3  188.08   12.90
  -3   7  -3  180.78   19.10
   3   7   3  199.68   16.20
  -3   7  -3  176.58   12.30
  -3   7  -3  185.38   14.10
  -3  -7   3  186.28   10.50
   4   7  -3   68.79    9.70
  -4   7   3   57.49    5.50
  -4   7   3   54.99    6.70
   4   7  -3   62.89    6.90
  -4   7   3   57.29    9.60
   4  -7   3   49.50    5.70
  -4  -7   3   49.90    5.00
  -4   7  -3   71.49    7.30
  -4   7  -3   55.69    5.30
   4   7   3   63.59    7.20
   4  -7  -3   49.99    5.90
  -4  -7   3   55.19    5.00
   4   7   3   44.90    9.30
  -4   7  -3   71.19   12.90
   5  -7   3  153.98   10.70
  -5   7   3  163.38   11.80
   5   7  -3  167.48   12.40
  -5  -7  -3  159.98    9.30
  -5   7   3  156.98   10.00
  -5   7   3  142.19   16.10
  -5   7  -3  159.38   11.80
   5   7   3  170.38   13.00
  -5  -7   3  153.08    9.60
   5  -7  -3  160.88   10.50
  -5   7  -3  165.78   21.50
  -6   7   3  390.46   20.10
  -6   7   3  299.17   27.80
  -6   7   3  378.46   18.00
   6   7  -3  394.56   21.50
   6  -7   3  376.16   19.40
  -6   7  -3  372.86   20.40
   6  -7  -3  358.86   18.80
  -6  -7   3  377.36   17.90
   6   7   3  344.87   21.50
  -7   7   3  344.47   20.00
   7   7  -3  351.66   19.80
  -7   7   3  366.96   17.80
   7  -7   3  351.86   18.10
  -7   7  -3  367.66   19.00
  -7  -7   3  365.06   16.60
   7  -7  -3  344.87   17.80
   7   7   3  332.77   20.10
   8  -7   3   27.10    3.20
   8   7  -3   22.90    3.50
  -8  -7   3   16.80    2.40
   8  -7  -3   23.00    3.50
   8   7   3   17.20    3.50
   0   8  -3  519.15   45.40
   0   8  -3  489.65   25.70
   0   8   3  479.95   25.30
   0   8  -3  468.05   25.70
  -1   8   3   11.60    2.90
   1   8  -3   14.70   10.10
  -1   8   3   15.40    5.30
   1   8  -3   21.50    4.20
  -1   8  -3   16.60    4.30
  -1  -8   3   10.80    2.30
  -1   8  -3   10.40    4.20
  -1   8  -3   19.70    9.80
   1   8   3   17.90    3.20
   1   8   3   19.30    3.90
  -2   8   3   62.29    7.30
  -2   8   3   58.89    9.00
   2   8  -3   70.99    7.60
  -2   8   3   67.09    6.50
   2   8  -3   68.59    6.90
  -2   8  -3   61.69   13.20
  -2   8  -3   79.79    6.30
  -2  -8   3   70.99    5.60
  -2   8  -3   67.09    7.20
   2   8   3   67.29    7.80
   2   8   3   74.29    6.80
   3   8  -3  178.88   12.80
   3   8  -3  171.78   11.40
  -3   8   3  175.18   12.50
   3   8  -3  177.48   16.10
  -3   8   3  179.08   11.00
  -3   8   3  156.38   15.60
  -3  -8   3  166.68   10.00
   3   8   3  131.09   17.90
  -3   8  -3  184.48   11.10
   3   8   3  182.08   12.90
   3   8   3  173.08   11.60
  -3   8  -3  185.28   21.00
  -3   8  -3  167.18   12.50
  -4   8   3  320.47   16.50
  -4   8   3  272.47   21.90
   4  -8   3  298.67   16.30
   4   8  -3  326.77   18.90
  -4   8   3  313.87   18.40
   4   8  -3  282.87   23.40
  -4   8  -3  274.17   26.80
   4   8   3  284.77   26.40
  -4  -8   3  306.37   15.20
  -4   8  -3  326.37   18.80
   4   8   3  354.06   19.80
  -4  -8   3  311.97   16.00
  -5  -8  -3   95.09    6.30
  -5   8   3   93.69    7.00
   5  -8   3   93.49    7.50
  -5   8   3   74.29   16.10
  -5   8   3  108.39    8.60
   5   8  -3   87.89    8.50
   5  -8  -3   83.99    7.00
   5   8   3  100.99    9.40
  -5  -8   3   95.59    6.70
  -5   8  -3   93.49    8.50
   6   8  -3  129.59   10.10
  -6   8   3  130.39    7.80
   6  -8   3  125.29    8.40
  -6   8   3  128.39    9.00
   6  -8  -3  117.29   11.70
  -6  -8   3  131.89    7.90
  -6   8  -3  127.89    9.60
   6   8   3  124.49   10.40
  -7   8   3   87.89    6.30
   7  -8   3   92.29    6.20
   7   8  -3   76.89    7.30
  -7   8  -3   96.19    7.10
  -7  -8   3   88.89    5.60
   7  -8  -3   84.39    5.80
   7   8   3   72.29    7.30
   8   8  -3    7.70    2.10
   8  -8   3    6.70    2.40
   8   8   3    3.80    2.30
  -8   8  -3   10.10    1.70
   0   9   3   12.80    2.70
   0   9  -3    7.50    2.50
   0   9   3   16.90    3.60
   0  -9   3   10.40    2.40
   0   9  -3   11.70    3.50
   0   9  -3   16.00    7.10
  -1   9   3  390.66   21.30
  -1   9   3  403.76   19.70
   1   9  -3  382.16   20.90
   1   9  -3  379.86   21.80
   1   9   3  387.86   18.80
  -1  -9   3  396.76   19.30
  -1   9  -3  356.96   28.50
   1   9   3  402.76   21.00
  -1   9  -3  380.06   21.60
  -2   9   3  486.45   25.40
  -2   9   3  418.06   25.70
   2   9  -3  498.85   24.50
  -2  -9  -3  471.35   21.80
  -2   9   3  508.85   23.60
   2   9  -3  499.75   25.90
  -2   9  -3  477.85   25.60
  -2  -9   3  487.45   22.60
   2   9   3  501.45   24.50
  -2   9  -3  455.25   34.80
   3   9  -3   68.49    8.50
   3   9  -3   88.39    8.50
  -3   9   3   86.39    8.80
  -3   9   3   73.19   15.40
  -3  -9   3   71.59    5.80
  -3   9  -3   64.09   17.00
   3   9   3   71.69    7.70
  -3   9  -3   53.79    9.60
   4   9  -3  157.88   11.40
  -4   9   3  138.39    9.20
  -4  -9  -3  158.28    9.00
  -4   9   3  147.39   10.80
  -4  -9   3  153.88    9.30
  -4  -9   3  151.18    8.70
   4   9   3  143.79   11.40
  -4   9  -3  146.79   11.00
  -5  -9  -3   97.69    6.30
  -5   9   3  109.79    8.20
  -5   9   3  103.29    7.00
   5   9  -3  109.29    8.90
   5   9   3   98.79    9.00
  -5   9  -3  110.99    8.70
  -5  -9   3  108.89    7.00
   6   9  -3   57.99    5.70
   6  -9   3   49.50    5.90
   6  -9   3   54.19    5.00
  -6   9   3   55.49    5.10
   6   9   3   55.09    6.10
  -6   9  -3   61.69    5.60
  -6  -9   3   53.79    4.10
   7   9  -3   21.60    3.10
  -7   9  -3   20.90    3.10
   7   9   3   18.70    3.90
   0  10   3  359.56   19.30
   0  10  -3  335.17   19.30
   0  10   3  367.56   17.40
  -1  10   3   67.99    5.90
   1  10  -3   66.29    6.60
   1  10  -3   81.79    7.50
  -1 -10  -3   65.99    5.30
  -1  10   3   64.09    6.60
   1 -10   3   70.79    6.00
  -1 -10   3   63.89    5.50
  -1  10  -3   69.49    6.90
   1  10   3   76.29    6.80
   2 -10   3  123.29    8.50
   2  10  -3  130.69    9.80
  -2 -10  -3  111.09    8.90
  -2  10   3  128.99    8.30
   2  10  -3  124.19    9.00
  -2  10   3  123.59    9.40
  -2  10  -3  127.39    9.70
  -2 -10   3  123.29    7.80
   2  10   3  116.39    8.80
   3  10  -3   64.19    6.60
  -3  10   3   66.79    5.50
   3 -10   3   55.99    5.20
  -3  10   3   62.69    6.30
  -3 -10   3   64.29    5.30
  -3  10  -3   58.89    6.30
  -3 -10   3   58.59    4.70
  -4  10   3   18.10    2.90
   4 -10   3   18.50    2.70
  -4 -10  -3   17.00    2.40
   4  10  -3   16.80    3.60
  -4  10   3   20.50    3.70
   4  10   3   11.60    3.80
  -4 -10   3   15.70    2.50
  -4  10  -3   12.60    3.00
  -5  10   3    2.10    1.70
  -5  10   3    1.30    0.90
   5 -10   3   -0.30    0.80
   5  10  -3    2.60    1.70
  -5 -10   3    2.40    1.20
   5  10   3    3.80    2.70
  -5  10  -3    1.30    1.10
   6  10   3   56.79    5.80
  -6 -10   3   70.99    3.90
  -6  10  -3   75.79    5.80
   0 -11   3   53.39    4.40
   0 -11  -3   48.10    4.00
   0  11  -3   47.70    5.00
   0  11   3   45.30    4.80
  -1 -11  -3   22.80    4.10
   1 -11   3   30.40    3.40
  -1  11   3   32.10    4.10
   1  11  -3   23.40    3.30
   1  11   3   28.20    3.80
  -1 -11   3   24.50    4.20
  -1  11  -3   31.30    4.00
  -2  11   3  104.19    7.70
   2  11  -3  109.49    7.60
   2  11  -3  118.19    8.20
   2 -11   3  129.59    8.20
  -2  11  -3  117.09    9.60
  -2 -11   3  125.09    7.90
  -2 -11   3  105.29    6.60
   3 -11   3   62.59    4.80
  -3 -11  -3   62.59    4.90
  -3  11   3   67.09    5.40
   3  11  -3   73.19    6.00
  -3  11  -3   73.49    6.10
  -3 -11   3   68.59    4.90
  -3 -11   3   65.89    4.30
  -4 -11  -3   44.00    4.30
   4 -11   3   45.60    3.70
  -4  11   3   43.00    3.60
   4  11  -3   42.60    4.30
  -4  11  -3   47.00    5.50
  -4 -11   3   48.40    3.80
   0 -12   3   48.80    3.60
   0 -12   3   42.10    3.30
   0  12  -3   41.20    3.80
   1 -12   3  129.39    7.30
  -1  12   3  126.19    8.10
   1 -12   3  144.69    7.30
   1 -12  -3  128.99    6.60
  -1  12  -3  124.89    7.60
  -1 -12   3  133.19    6.80
  -1 -12   3  136.19    7.20
   2 -12   3   97.09    5.50
  -2  12   3  108.19    6.00
  -2 -12  -3  101.29    5.50
   2 -12   3  125.89    6.90
  -2 -12   3  121.39    6.40
   2 -12  -3  101.89    5.70
  -2  12  -3   93.29    6.50
   0   0   4 9999.00  387.96
  -1   0   4   65.49    5.90
  -1   0   4   78.59    4.90
   1   0   4   84.09    5.60
   1   0  -4   79.69    4.60
  -2   0   4   18.00    2.70
   2   0   4   19.00    2.80
   2   0   4   17.70    3.00
   3   0   4 3605.94  146.59
  -3   0   4 3602.24  145.79
   3   0   4 3656.23  145.39
   3   0  -4 3687.23  142.99
  -4   0   4  643.54   32.80
   4   0  -4  671.43   28.80
   4   0   4  659.53   31.50
   5   0  -4   95.79    8.10
   5   0   4  107.99    9.80
   5   0  -4   91.89    7.70
  -5   0   4  105.59   10.40
  -6   0   4   99.49    6.80
   6   0  -4  104.19    8.70
   6   0   4   96.09   10.90
  -6   0   4  103.99   11.80
  -6   0   4  104.59   10.20
   6   0   4  113.49   10.70
   6   0   4  104.29    7.80
   6   0  -4   90.39    9.00
   7   0  -4  253.47   19.10
  -7   0   4  263.57   13.10
   7   0   4  208.38   18.90
   7   0   4  257.77   14.00
   7   0  -4  236.38   16.50
   8   0  -4   -0.50    1.40
   8   0   4   -0.40    1.60
  -8   0   4   -1.60    1.50
   9   0   4   17.60    3.20
  -9   0   4   17.50    4.20
   9   0  -4   16.70    2.90
 -10   0  -4  152.48    8.50
  10   0  -4  137.39    7.60
   0   1   4 3042.70  121.89
   0   1   4 3031.80  119.89
   0   1  -4 3194.28  123.79
   1   1  -4 2403.56   96.49
  -1   1   4 2336.87   96.39
  -1   1   4 2407.36   97.29
   1   1  -4 2497.35   99.89
   1  -1   4 2531.65   97.79
   1  -1  -4 2422.76   96.09
  -1   1  -4 2417.56   98.99
   1   1   4 2532.85   97.89
   1   1   4 2486.55   95.59
  -2   1   4 1524.05   64.19
   2   1  -4 1546.95   62.99
   2  -1   4 1642.24   64.59
  -2  -1   4 1502.35   64.69
  -2   1  -4 1568.44   66.29
   2   1   4 1649.23   65.29
   2   1   4 1607.64   63.59
   2  -1  -4 1526.35   62.39
  -3   1   4  441.96   22.00
   3  -1   4  448.06   21.70
   3   1  -4  445.46   19.80
   3   1   4  453.95   21.90
   3   1   4  447.46   22.00
  -3   1  -4  450.45   23.80
  -3  -1   4  417.46   22.20
   3  -1  -4  445.66   19.40
   4   1  -4  910.11   38.50
  -4   1   4  936.61   42.20
   4  -1   4  919.31   41.00
   4   1   4  892.61   42.60
   4  -1  -4  931.61   38.30
   4   1   4  897.21   41.40
  -4  -1   4  902.31   42.50
  -4   1  -4  844.02   43.40
   5   1  -4  528.85   25.10
  -5   1   4  542.75   29.40
   5  -1   4  522.35   27.60
   5   1  -4  508.05   29.90
  -5  -1   4  549.45   30.00
   5  -1  -4  533.65   25.10
   5  -1  -4  501.75   25.20
   5   1   4  538.15   29.40
   5   1   4  532.05   28.20
  -6   1   4    7.60    9.60
   6  -1   4    5.30    2.20
   6  -1   4   -1.30    4.00
   6   1  -4    2.30    3.80
   6   1  -4    3.90    2.90
  -6   1   4   11.20    2.90
  -6   1   4    3.60    2.20
   6  -1  -4    0.80    2.40
  -6  -1   4    3.00    2.40
   6   1   4   12.70    4.50
   6   1   4    3.80    3.40
   6  -1  -4    8.10    3.80
  -6  -1   4    0.90    1.60
  -6  -1   4   -6.60    6.30
   6   1   4    3.40    2.40
  -7   1   4   76.49    5.90
   7   1  -4   56.49    9.70
   7  -1   4   70.29    6.60
   7  -1   4   57.49   11.00
  -7   1   4   76.39   11.60
   7   1  -4   66.39    8.80
  -7  -1   4   64.09   22.30
   7   1   4   49.00   10.70
   7  -1  -4   79.59    8.90
   7   1   4   72.29    6.50
   7   1   4   71.29    8.60
  -7  -1   4   72.39    5.60
   8   1  -4   86.09    8.80
  -8   1   4   84.59   22.90
   8  -1   4   86.59    7.00
   8   1   4   91.39    9.70
   8  -1  -4   84.79    6.90
   9  -1   4   15.50    3.00
  -9   1   4    9.90    2.80
   9   1  -4   14.70    2.90
  -9  -1   4    8.80    2.80
  -9   1  -4   17.00    2.80
   9  -1  -4   10.70    2.40
  10  -1   4    2.00    1.50
  10  -1  -4    0.10    1.20
 -10   1  -4    2.20    1.40
   0   2   4  776.32   32.50
   0   2  -4  759.92   35.20
   1   2  -4  197.78   10.00
   1   2  -4  220.68   13.50
  -1   2   4  223.28   10.10
   1   2   4  216.08   11.30
  -1   2  -4  202.88   12.80
   1  -2  -4  195.98    9.20
   2  -2   4   21.80    3.00
   2   2  -4   19.00    2.30
  -2   2   4   14.20    2.70
   2   2   4   19.70    3.10
   2  -2  -4   20.00    1.90
  -2   2  -4   21.90    4.10
   3   2  -4 2858.01  110.99
  -3   2   4 2806.32  113.59
   3  -2   4 2784.12  112.79
  -3  -2   4 2747.72  114.79
   3   2   4 2788.72  113.69
  -3   2  -4 2717.93  116.19
   3  -2  -4 2863.21  110.29
   4   2  -4  275.87   13.90
  -4   2   4  279.07   16.90
   4  -2   4  273.77   15.60
   4   2   4  258.47   16.20
  -4  -2   4  259.47   17.60
  -4   2  -4  253.57   18.30
   4  -2  -4  271.07   13.50
  -5   2   4  882.51   39.20
   5  -2   4  866.61   40.00
   5  -2   4  955.60   43.20
   5   2  -4  895.01   43.00
  -5   2   4  946.41   45.50
   5   2  -4  971.50   41.20
   5  -2  -4  964.70   40.80
   5  -2  -4  853.01   39.70
  -5  -2   4 1002.60   47.50
   5   2   4  977.10   43.60
  -5  -2   4  872.71   38.80
  -5   2  -4  899.81   48.80
   5   2   4  976.20   44.90
   6  -2   4  352.86   18.40
   6  -2   4  346.27   22.10
  -6   2   4  359.66   24.00
   6   2  -4  370.66   20.00
   6   2  -4  371.06   19.80
   6   2  -4  353.76   21.50
  -6   2   4  338.97   17.30
  -6  -2   4  380.06   26.80
  -6  -2   4  353.76   17.10
   6   2   4  360.06   21.30
   6   2   4  325.17   22.50
   6  -2  -4  346.37   19.60
   7   2  -4  369.36   23.90
   7   2  -4  382.36   21.50
   7   2  -4  403.06   22.80
  -7   2   4  393.66   18.90
  -7   2   4  361.16   28.00
   7  -2   4  403.26   20.10
  -7  -2   4  385.46   18.30
   7   2   4  368.66   25.60
   7   2   4  348.37   22.60
   8   2  -4  252.47   16.50
  -8   2   4  206.88   29.40
   8   2  -4  282.87   14.20
   8  -2   4  321.67   20.90
  -8   2   4  279.47   14.40
  -8  -2   4  286.57   14.00
   8   2   4  280.07   21.80
   9  -2   4   48.10    4.80
  -9   2   4   36.60    4.30
  -9  -2   4   39.40    4.10
   9  -2  -4   49.30    4.80
  -9   2  -4   45.40    4.70
 -10  -2  -4   22.60    2.60
  10  -2   4   23.80    3.10
  10  -2  -4   22.50    2.70
   0   3  -4  492.25   25.60
   0   3  -4  475.75   21.20
   0   3   4  490.25   21.90
   0   3   4  500.05   20.10
   1   3  -4  825.22   39.60
  -1   3   4  813.72   34.50
   1   3   4  840.02   35.80
  -1   3  -4  825.12   39.10
   2   3  -4 1940.81   82.59
   2   3  -4 1761.52   75.79
  -2   3   4 1922.81   77.49
  -2   3  -4 1834.92   81.39
   2  -3  -4 1912.01   74.59
   2   3   4 2005.10   78.49
   3   3  -4  103.59    6.80
   3  -3   4  101.79    7.40
  -3   3   4  106.89    8.60
  -3  -3   4  103.99    9.60
   3   3   4  110.99    8.90
  -3   3  -4  111.99   10.70
   3  -3  -4  112.19    6.30
  -4   3   4  465.85   24.80
   4   3  -4  453.55   21.40
   4  -3   4  463.45   22.20
   4   3   4  435.46   24.40
  -4   3  -4  441.46   27.60
  -4  -3   4  483.45   26.60
   4  -3  -4  395.66   18.90
   4  -3  -4  455.65   20.90
   5  -3   4  154.88   10.10
  -5   3   4  142.29    9.60
   5   3  -4  186.08   11.30
   5   3  -4  174.68   13.00
  -5   3   4  174.68   14.20
   5  -3   4  166.68   12.00
  -5   3   4  171.88   10.00
  -5  -3   4  158.38    9.30
   5  -3  -4  149.19   10.30
   5   3   4  171.58   13.80
  -5  -3   4  165.88   16.20
  -5   3  -4  136.59   16.00
   5   3   4  176.08   12.60
   6   3  -4   49.00    7.70
   6   3  -4   63.89    7.40
  -6   3   4   69.59   10.40
  -6   3   4   55.09    5.50
  -6   3   4   45.70    7.10
   6   3  -4   59.99    6.80
  -6   3   4   62.59    5.40
   6  -3   4   60.79    5.80
  -6   3  -4   61.09    5.90
   6   3   4   59.09    9.10
  -6  -3   4   60.59   18.70
  -6  -3   4   53.69    4.90
   6   3   4   56.79    7.20
  -7   3   4   71.19   14.20
   7   3  -4   73.59    8.10
  -7   3   4   84.99    6.70
   7   3  -4   75.89   11.20
   7   3  -4   79.19    9.90
   7  -3   4   89.09    7.40
  -7  -3   4   90.09    6.40
   7  -3  -4   87.59    7.20
   7   3   4  105.09   10.10
  -7   3  -4   90.99    7.50
   8  -3   4   36.30    4.40
  -8   3   4   31.00    4.10
   8   3  -4   26.50    5.10
  -8   3  -4   30.10    4.20
  -8  -3   4   24.80    3.60
   8  -3  -4   35.20    4.30
   8   3   4   28.20    5.80
   9  -3   4    2.60    1.60
   9   3  -4   10.40    5.20
  -9  -3   4    3.30    2.90
  -9   3  -4    2.40    1.50
   9  -3  -4    0.90    1.30
  10  -3   4   15.50    2.40
  10  -3  -4   15.10    2.40
 -10   3  -4   16.60    2.90
   0   4  -4  352.06   21.40
   0   4   4  365.46   16.30
   0   4   4  350.76   17.00
   1   4  -4 1828.12   80.29
   1   4  -4 1788.52   73.29
  -1   4   4 1832.72   74.39
  -1   4  -4 1785.02   79.89
   1   4   4 1917.11   75.39
  -2   4   4  484.05   22.90
   2   4  -4  470.85   27.30
   2   4  -4  431.76   20.60
   2   4   4  475.75   23.30
  -2   4  -4  449.86   26.60
  -3   4   4   11.40    3.60
   3   4  -4    4.00    1.60
  -3  -4   4    8.40    4.50
  -3   4  -4    7.30    4.50
   3   4   4    3.70    2.30
  -4   4   4  310.07   16.40
  -4   4   4  353.96   20.90
   4   4  -4  339.07   17.00
   4  -4   4  294.27   16.40
   4   4  -4  324.57   18.40
  -4   4   4  296.07   15.60
  -4   4  -4  300.47   16.80
  -4  -4   4  317.97   15.60
   4   4   4  350.56   18.80
  -4  -4   4  325.17   22.80
   4   4   4  340.17   20.40
  -4   4  -4  333.27   24.00
   5  -4   4  130.49    9.30
  -5   4   4  140.69    8.70
   5   4  -4  156.48   14.80
   5   4  -4  134.39   10.50
  -5   4   4  133.69    9.10
   5   4  -4  143.09   10.40
  -5   4   4  133.79   13.30
  -5   4  -4  111.79   16.10
  -5  -4   4  134.19    8.40
   5   4   4  146.09   11.10
  -5  -4   4  138.49   11.10
  -5  -4   4  150.88   16.80
  -5   4  -4  121.59    9.30
   5   4   4  146.59   16.60
   6   4  -4    8.40    4.60
  -6   4   4   17.00    7.40
  -6   4   4   13.00    3.00
  -6   4   4   11.40    4.20
   6   4  -4   11.80    3.70
  -6   4   4   10.00    4.10
   6  -4   4    9.10    2.30
   6   4  -4    4.80    2.90
  -6  -4   4    7.20    2.20
   6   4   4   13.00    4.00
   6   4   4    6.10    5.50
  -6   4  -4   12.50    3.00
  -7   4   4   50.89    5.10
   7  -4   4   49.20    5.60
   7   4  -4   46.30    8.80
   7   4  -4   42.00    9.10
   7   4  -4   50.69    6.90
  -7  -4   4   49.60    4.70
  -7   4  -4   53.29    5.90
   7   4   4   55.89   12.50
   7   4   4   44.40    6.80
   7  -4  -4   47.90    5.40
   8  -4   4  266.47   14.60
   8   4  -4  228.58   15.40
   8  -4  -4  272.87   14.60
   8   4   4  247.38   16.90
  -8  -4   4  261.07   13.00
   9  -4   4  137.49    8.50
   9   4  -4  107.69    8.40
   9  -4  -4  124.59    9.30
  -9   4  -4  133.69    8.20
  -9  -4   4  105.69    6.70
   0   5  -4 4366.36  170.18
   0   5  -4 4366.36  179.38
   0   5   4 4268.97  171.28
   0   5   4 4353.46  171.28
  -1   5   4 1158.78   48.70
   1   5  -4 1101.29   46.40
   1   5  -4 1108.49   54.49
  -1   5  -4 1103.39   54.59
  -1   5  -4 1107.29   46.40
   1   5   4 1194.38   49.10
   2   5  -4  123.39    7.60
   2   5  -4  136.89   13.00
  -2   5   4  128.89    9.80
  -2   5  -4  117.09    7.50
   2   5   4  126.59    9.90
  -2   5  -4  118.99   12.50
   3   5  -4  259.37   16.60
  -3   5   4  307.97   18.40
  -3   5   4  286.87   15.40
   3   5  -4  316.77   15.10
  -3   5   4  272.77   14.40
  -3   5  -4  259.27   14.30
  -3   5  -4  268.57   15.60
  -3   5  -4  284.07   21.80
   3   5   4  291.27   18.20
   3   5   4  293.27   15.30
  -3  -5   4  308.57   21.30
   4   5  -4  420.06   23.40
  -4   5   4  394.06   19.70
   4  -5   4  360.36   19.50
  -4   5   4  392.96   24.00
  -4   5   4  386.76   18.90
  -4   5   4  387.06   20.70
   4   5  -4  414.46   20.20
   4   5  -4  383.56   21.30
   4   5   4  383.16   23.90
  -4   5  -4  371.86   20.30
  -4  -5   4  385.46   18.60
   4   5   4  412.96   21.90
  -4   5  -4  389.26   28.80
  -4   5  -4  372.06   18.60
   5   5  -4  106.79   11.50
  -5   5   4   93.19    7.60
  -5   5   4   97.49    7.10
  -5   5   4  110.09   12.00
   5  -5   4   97.99    8.00
   5   5  -4  101.39    9.30
  -5   5   4   87.99    8.70
   5   5  -4   94.29    8.80
   5   5   4  111.99   11.20
  -5  -5   4   90.39    6.70
  -5   5  -4  106.49   10.10
  -5   5  -4   82.69   16.10
   5   5   4   84.59   11.70
  -5  -5   4   94.89    6.80
  -6   5   4   51.19    5.60
   6   5  -4   44.80    9.20
   6   5  -4   48.00    8.00
   6  -5   4   54.39    5.90
  -6   5   4   59.09    6.90
   6   5  -4   50.29    6.60
  -6   5   4   57.19    5.40
  -6   5   4   37.50   10.00
  -6   5  -4   54.29    5.90
   6  -5  -4   49.80    5.60
   6   5   4   46.90   10.20
   6   5   4   55.89    7.10
  -6  -5   4   58.99    5.00
   7  -5   4  181.98   13.60
  -7   5   4  186.28   27.20
  -7   5   4  206.88   10.80
   7   5  -4  186.48   14.70
   7  -5  -4  230.88   13.40
  -7  -5   4  184.08   10.80
   7   5   4  180.38   18.40
   8  -5   4    4.90    1.90
   8   5  -4   11.80    3.30
   8  -5  -4    6.80    2.20
  -8  -5   4    6.80    1.90
  -8   5  -4    8.90    2.40
   8   5   4    4.60    3.00
   9  -5   4   10.20    2.10
   9   5  -4    8.00    3.70
   9  -5  -4   14.50    2.40
  -9   5  -4   10.10    2.30
   0   6  -4  551.84   32.90
   0   6  -4  557.04   23.70
   0   6   4  524.05   25.50
  -1   6   4  844.62   38.60
   1   6  -4  760.62   38.80
   1   6  -4  891.01   45.90
  -1   6   4  829.02   36.50
   1   6  -4  969.00   42.80
   1   6  -4  915.41   35.90
  -1   6  -4  849.91   45.60
  -1   6  -4  842.32   35.30
   1   6   4  855.01   38.40
  -1  -6   4  818.92   36.10
  -1   6  -4  759.02   37.70
   1   6   4  834.42   37.60
  -1   6  -4  828.32   36.60
  -2   6   4  265.47   13.90
   2   6  -4  278.57   21.40
   2   6  -4  248.68   16.00
   2   6  -4  284.07   13.70
   2   6  -4  250.87   14.60
  -2   6   4  243.38   14.90
  -2   6  -4  264.97   13.90
  -2   6  -4  234.38   14.90
   2   6   4  262.67   14.80
  -2   6  -4  248.58   20.80
   2   6   4  269.17   16.90
   3   6  -4  523.55   27.40
  -3   6   4  554.04   29.60
  -3   6   4  528.75   24.70
   3   6  -4  534.75   25.50
   3   6  -4  573.54   29.30
   3  -6   4  471.95   24.60
  -3   6   4  521.05   26.20
   3   6  -4  554.64   25.20
   3   6   4  567.24   25.80
   3   6   4  565.24   29.70
   3   6   4  563.44   27.20
  -3   6  -4  540.65   34.80
   3  -6  -4  465.45   24.10
  -3  -6   4  513.05   23.90
  -3   6  -4  481.75   26.10
  -3   6  -4  532.55   24.70
  -4   6   4   41.90    6.10
   4   6  -4   38.60    6.40
   4   6  -4   43.90    6.20
   4   6  -4   45.70    7.40
   4  -6   4   44.10    5.30
  -4   6   4   42.90    8.10
  -4   6   4   40.20    4.80
   4  -6  -4   48.20    5.20
  -4   6  -4   54.09    5.80
   4   6   4   34.10    7.30
  -4  -6   4   41.40    4.20
  -4  -6   4   47.50    4.60
  -4   6  -4   27.70   10.30
   4   6   4   55.09    7.30
   5  -6   4  177.48   12.00
   5   6  -4  178.88   13.70
   5   6  -4  190.18   13.40
  -5   6   4  197.38   12.70
  -5   6   4  198.98   11.40
   5   6  -4  196.88   16.10
  -5   6   4  218.38   24.50
   5  -6  -4  170.58   11.40
   5   6   4  185.38   13.80
  -5  -6   4  203.08   11.20
  -5   6  -4  156.58   20.90
   5   6   4  194.68   17.70
  -5   6  -4  187.18   12.90
  -5  -6   4  190.28   10.50
  -6   6   4   -2.10    3.20
   6  -6   4    4.10    1.80
   6   6  -4    5.30    5.70
   6   6  -4    2.10    2.10
  -6   6   4    1.00    1.60
   6   6  -4   16.20    7.00
  -6   6   4   -0.10    7.50
   6  -6  -4    4.70    2.20
   6   6   4   -0.30    2.30
  -6  -6   4    2.60    1.50
   6   6   4   -9.60    7.30
  -6   6  -4    5.70    2.40
   7   6  -4  236.78   15.40
  -7   6   4  252.87   12.20
   7  -6   4  240.68   13.90
   7  -6  -4  239.88   13.50
  -7  -6   4  238.68   12.30
  -7   6  -4  236.78   14.30
   7   6   4  204.88   15.50
   8   6  -4  109.89    8.80
   8  -6   4  127.39    8.40
   8  -6  -4   92.29    9.60
  -8   6  -4  119.09    8.60
  -8  -6   4  107.69    6.30
   8   6   4   93.49    8.80
   9  -6   4    1.30    1.20
   9   6  -4    1.60    2.40
   9  -6  -4    3.30    1.60
  -9   6  -4    3.50    1.60
   0   7   4 1736.43   68.69
   0   7   4 1708.23   70.29
   0   7  -4 1612.54   70.39
   0   7  -4 1583.24   71.49
   1   7  -4  269.47   15.60
   1   7  -4  245.98   14.40
  -1   7   4  230.38   14.70
   1   7  -4  244.18   21.10
   1   7  -4  214.08   15.00
  -1   7   4  238.48   13.00
  -1   7   4  221.48   14.00
  -1   7  -4  210.28   14.80
  -1  -7   4  226.88   12.60
  -1   7  -4  225.68   14.30
  -1   7  -4  224.38   20.60
   1   7   4  234.88   14.00
   1   7   4  235.88   12.70
   2   7  -4   66.39    8.00
  -2   7   4   45.70    5.90
   2  -7   4   58.79    6.50
   2   7  -4   47.70    6.40
  -2   7   4   49.10    5.00
   2   7  -4   61.19    6.20
  -2   7   4   53.09    7.40
  -2  -7   4   54.99    5.00
   2   7   4   54.59    6.00
   2   7   4   50.89    8.40
  -2   7  -4   68.99   12.00
  -2   7  -4   50.99    6.30
  -2   7  -4   56.89    5.50
  -2   7  -4   55.19    6.80
  -3   7   4  652.33   31.50
   3   7  -4  674.33   34.60
   3   7  -4  641.24   33.70
  -3   7   4  643.34   29.70
   3  -7   4  577.74   29.40
   3   7  -4  650.23   30.60
  -3   7  -4  660.43   32.20
   3   7   4  670.83   31.20
  -3   7  -4  653.33   32.00
   3   7   4  661.03   32.10
  -3  -7   4  629.94   28.70
   3   7   4  654.73   35.50
  -3   7  -4  632.14   41.10
   4   7  -4  378.46   23.20
  -4   7   4  394.06   18.80
  -4   7   4  369.06   20.50
   4  -7   4  357.96   19.00
   4   7  -4  370.86   23.90
   4   7  -4  375.86   21.40
   4  -7  -4  334.27   18.20
  -4   7  -4  316.47   29.10
   4   7   4  365.26   25.80
  -4  -7   4  364.66   17.60
  -4  -7   4  369.96   18.30
   4   7   4  372.96   21.40
  -4   7  -4  362.76   20.70
   5   7  -4  550.24   27.70
  -5   7   4  523.75   24.40
  -5   7   4  525.95   26.30
  -5   7   4  466.95   31.40
  -5  -7  -4  527.35   23.20
   5  -7   4  521.75   25.50
   5   7  -4  510.55   31.20
  -5  -7   4  537.95   24.20
  -5   7  -4  530.25   26.90
   5   7   4  519.75   28.00
   5   7   4  458.15   32.80
   5  -7  -4  511.75   24.60
  -5  -7   4  503.15   23.20
  -6   7   4  481.75   22.90
   6  -7   4  499.15   24.40
   6   7  -4  501.65   26.20
  -6   7   4  512.25   24.40
   6   7   4  449.46   26.50
  -6  -7   4  514.15   23.00
   6  -7  -4  497.45   23.90
  -6   7  -4  523.05   25.70
   7  -7   4  103.99    7.40
  -7   7   4   91.89    6.10
   7   7  -4   84.39    8.00
  -7   7  -4  103.79    8.00
   7  -7  -4   90.59    6.90
   7   7   4   87.89    8.90
  -7  -7   4   99.29    6.20
   8   7  -4   23.10    3.60
   8  -7   4   20.10    2.90
  -8  -7   4   28.30    2.60
  -8   7  -4   21.40    2.90
   8   7   4   23.50    4.20
   8  -7  -4   24.40    3.00
   0   8   4 1573.94   66.59
   0   8  -4 1548.15   66.99
   0   8  -4 1445.56   74.49
   0   8   4 1594.94   64.79
   0   8  -4 1660.73   88.09
   0  -8   4 1495.95   64.49
   1   8  -4  392.66   29.80
  -1   8   4  452.05   21.30
   1   8  -4  431.46   23.90
   1   8  -4  437.26   22.70
  -1   8   4  436.16   22.60
   1   8   4  392.36   24.80
  -1   8  -4  389.66   32.90
   1   8   4  427.56   22.20
  -1  -8   4  435.26   20.70
  -1   8  -4  426.46   23.00
  -2   8   4  232.28   20.80
   2   8  -4  237.68   14.60
  -2   8   4  258.47   14.00
   2   8  -4  251.47   18.20
   2   8  -4  216.08   15.40
  -2   8   4  242.88   15.20
   2   8   4  258.57   15.90
  -2   8  -4  239.58   15.40
   2   8   4  245.28   14.50
  -2  -8   4  243.58   13.10
  -2   8  -4  227.68   15.40
  -2   8  -4  212.18   22.40
  -3   8   4  390.56   19.40
   3   8  -4  344.87   24.50
   3  -8   4  344.57   18.70
   3   8  -4  383.56   19.90
  -3   8   4  395.96   21.20
   3   8  -4  404.26   22.20
  -3   8   4  366.96   23.10
  -3   8  -4  374.96   21.40
   3   8   4  398.76   20.30
   3   8   4  413.46   22.00
  -3  -8   4  368.66   18.30
  -3   8  -4  333.87   30.20
   4  -8   4   73.79    7.00
   4   8  -4   72.09    7.90
  -4   8   4   60.99   10.50
  -4   8   4   71.59    6.10
  -4   8   4   73.39    7.50
   4   8   4   71.69    8.50
  -4  -8   4   72.69    5.60
  -4  -8   4   73.89    6.00
  -4   8  -4   64.59    7.50
  -5   8   4  648.44   29.40
  -5   8   4  604.64   27.50
   5  -8   4  597.34   28.10
   5   8  -4  586.74   30.20
  -5  -8  -4  614.94   26.40
  -5   8  -4  587.44   29.90
  -5  -8   4  611.34   27.40
  -5  -8   4  627.04   26.40
   5  -8  -4  592.24   27.40
   5   8   4  579.24   30.90
   6  -8   4   75.29    5.80
  -6   8   4   71.49    6.40
   6   8  -4   67.49    7.10
   6  -8   4   69.59    5.90
  -6   8   4   71.89    5.30
  -6   8  -4   81.69    7.10
   6   8   4   66.29    7.40
   6  -8  -4   74.09    6.00
  -6  -8   4   68.99    5.40
   7   8  -4   55.79    5.70
   7  -8   4   57.19    5.30
   7   8   4   53.69    5.90
   7  -8  -4   52.29    5.40
  -7  -8   4   59.89    4.20
  -7   8  -4   54.49    5.30
   0   9   4  161.88   11.40
   0   9  -4  150.48   11.70
   0  -9   4  155.28   10.00
   0   9  -4  142.39   10.90
   0   9   4  152.28    9.90
  -1   9   4   49.90    6.00
  -1   9   4   43.20    5.00
   1  -9   4   47.60    5.00
   1   9  -4   48.40    6.70
   1   9  -4   47.30    5.50
  -1  -9   4   44.80    4.70
  -1   9  -4   29.40   10.10
   1   9   4   50.69    5.80
   1   9   4   39.10    4.50
  -1   9  -4   41.60    5.90
  -1   9  -4   52.29    7.00
  -2   9   4   30.30    4.80
   2   9  -4   31.60    4.70
   2   9  -4   27.40    5.20
  -2   9   4   26.20    4.10
   2   9   4   36.10    4.70
  -2   9  -4   28.40    4.80
  -2   9  -4    6.30   11.20
  -2  -9   4   28.80    3.70
  -3   9   4   10.10    3.20
  -3   9   4   17.50    3.40
   3   9  -4   18.20    3.60
   3   9  -4   14.00    3.80
  -3  -9   4   10.00    2.30
  -3  -9   4   16.00    2.80
  -3   9  -4   -3.20   12.60
  -3   9  -4   11.20    3.30
   3   9   4   15.60    4.50
  -4  -9  -4  252.07   12.40
   4   9  -4  223.58   14.80
  -4   9   4  246.18   14.40
  -4   9   4  230.28   12.90
  -4  -9   4  230.08   12.70
  -4  -9   4  238.48   12.20
  -4   9  -4  223.58   14.60
   4   9   4  253.37   15.70
  -5   9   4   27.40    3.30
  -5   9   4   24.60    4.20
   5  -9   4   25.60    3.00
   5   9  -4   29.00    4.60
  -5  -9   4   26.40    3.10
  -5   9  -4   32.20    4.50
   5   9   4   19.20    4.10
   6  -9   4   23.80    3.40
   6   9  -4   26.10    4.00
  -6   9   4   18.80    2.70
   6  -9   4   27.00    4.20
   6   9   4   22.40    4.00
  -6   9  -4   23.30    3.70
  -6  -9   4   30.00    2.90
   7   9  -4   99.79    8.40
  -7  -9   4   80.29    4.60
  -7   9  -4   80.49    6.30
   0  10  -4   84.79    7.30
   0 -10   4   70.19    5.90
   0  10   4   79.39    7.00
   0  10  -4   70.69    7.00
   0  10   4   73.59    5.80
   1  10  -4  228.78   14.10
  -1  10   4  224.88   12.30
   1  10  -4  219.08   13.50
  -1  10   4  211.08   13.60
   1 -10   4  219.78   12.50
  -1 -10  -4  227.28   11.70
  -1 -10   4  230.08   12.30
   1  10   4  219.18   13.30
  -1  10  -4  223.78   14.00
   2  10  -4    4.20    1.90
  -2  10   4    5.40    2.20
  -2  10   4    2.90    1.70
   2 -10   4    2.70    1.40
   2  10  -4    5.80    2.50
  -2 -10   4    4.70    1.70
   2  10   4    2.60    2.00
  -2  10  -4    4.80    2.00
  -3  10   4  405.06   19.60
   3 -10   4  423.26   20.00
  -3  10   4  415.66   21.00
   3  10  -4  437.66   22.00
  -3 -10   4  399.86   19.50
  -3 -10   4  414.56   19.00
  -3  10  -4  406.46   21.60
  -4  10   4  276.07   13.90
   4  10  -4  209.68   16.40
   4 -10   4  268.27   14.20
  -4  10   4  260.07   13.10
  -4 -10  -4  254.77   13.20
  -4  10  -4  276.27   15.00
  -4 -10   4  258.47   13.30
  -4 -10   4  271.77   13.10
   4  10   4  252.57   15.40
  -5  10   4   80.59    5.40
   5  10  -4   88.09    6.90
  -5  10   4   78.29    5.30
   5 -10   4   86.99    5.80
  -5 -10   4   88.69    5.40
  -5  10  -4   90.59    6.60
   6  10  -4   81.39    5.90
  -6 -10   4   86.79    4.50
  -6  10  -4   88.19    5.80
   0 -11  -4    1.10    1.00
   0  11   4    6.20    2.00
   0  11  -4    4.10    1.60
   0 -11   4    3.60    1.30
  -1  11   4  144.29    9.20
   1 -11   4  135.49    8.20
  -1  11  -4  129.29    9.00
   1  11   4  142.19    9.30
  -1 -11   4  127.39    8.10
  -1 -11   4  148.29    9.70
   2  11  -4   46.10    4.30
   2  11  -4   55.29    5.70
  -2  11   4   45.90    4.50
   2 -11   4   51.69    4.70
  -2  11   4   38.00    3.80
  -2 -11   4   51.19    4.50
  -2 -11   4   46.90    3.80
  -2  11  -4   38.70    4.50
   3 -11   4   11.80    2.00
  -3 -11  -4   11.00    2.00
  -3  11   4   10.10    1.90
   3  11  -4   11.20    2.70
  -3  11   4   11.40    2.30
  -3  11  -4   12.10    2.60
  -3 -11   4   12.80    1.90
  -3 -11   4   13.30    2.30
   4  11  -4   92.99    6.20
   4 -11   4   87.59    5.10
  -4  11  -4   82.19    5.80
  -4 -11   4   78.09    5.00
   0 -12   4   34.20    3.30
   0  12  -4   41.80    4.40
   0 -12   4   36.30    3.50
   1 -12   4    0.80    0.90
   1 -12   4    2.20    0.90
   1 -12  -4    0.10    1.30
  -1 -12   4    4.50    1.00
  -1 -12   4    3.10    1.10
  -1  12  -4    2.60    1.40
   2 -12   4   13.50    1.80
  -2 -12   4   10.90    1.60
  -2  12  -4    7.60    1.50
   2 -12  -4   11.40    1.60
   0   0   5    0.70    0.90
   0   0   5    0.90    1.20
   1   0  -5 1477.85   59.39
  -1   0   5 1421.76   59.69
   1   0   5 1550.14   61.09
  -1   0   5 1418.26   60.99
   1   0   5 1527.55   59.69
   2   0   5 3464.75  135.29
   2   0  -5 3366.56  133.69
  -2   0   5 3233.38  135.09
   2   0   5 3535.15  136.09
  -3   0   5    9.50    3.20
   3   0   5    8.40    2.90
   3   0  -5    7.90    1.70
   4   0  -5  273.87   13.70
   4   0   5  281.57   16.70
  -4   0   5  252.07   16.60
   5   0   5  504.75   27.60
   5   0  -5  489.85   23.80
  -5   0   5  523.75   28.50
  -5   0   5  467.85   22.10
   5   0   5  502.55   27.30
  -6   0   5   62.29    5.20
   6   0   5   62.39    5.90
   6   0  -5   58.49    7.40
   6   0   5   47.30    8.80
  -6   0   5   53.89    5.40
   6   0  -5   60.79    6.90
  -6   0   5   61.19   11.10
   7   0  -5    7.10    4.50
   7   0   5    2.00    6.30
   7   0   5    1.30    1.60
   7   0  -5    1.90    5.60
  -7   0   5   -6.20    8.70
   8   0   5   95.69    7.80
  -8   0   5  109.09    8.20
  -9   0   5    8.50    2.70
   9   0  -5    3.80    1.70
   9   0   5    5.30    2.30
 -10   0  -5   48.00    5.00
  10   0  -5   50.39    3.70
   0   1   5  521.55   22.20
   0  -1   5  578.24   25.90
   0   1   5  566.54   22.30
   0   1   5  559.24   24.80
   1  -1   5   56.19    4.90
   1   1  -5   49.70    5.70
   1   1  -5   52.49    4.00
  -1   1   5   50.29    4.20
   1  -1   5   60.09    5.10
  -1   1   5   60.09    4.00
   1   1   5   51.39    4.80
   1  -1  -5   51.89    3.70
   1   1   5   58.19    3.20
   2   1  -5   25.70    2.70
   2  -1   5   33.90    5.30
  -2   1   5   30.20    3.60
   2  -1   5   27.60    5.50
  -2   1   5   21.90    3.90
  -2  -1   5   20.70    3.30
   2   1   5   29.00    3.80
   2  -1  -5   22.90    2.40
  -2   1  -5   23.70    4.30
   3  -1   5  460.15   22.50
   3   1  -5  460.35   20.30
  -3   1   5  448.46   22.30
   3  -1  -5  450.65   19.70
   3   1   5  443.36   22.60
   3   1   5  464.85   21.90
  -3   1  -5  398.76   23.80
  -3  -1   5  421.46   22.50
   4  -1   5 1492.65   64.09
  -4   1   5 1491.75   64.49
   4   1  -5 1450.55   60.89
   4   1   5 1428.46   64.19
   4  -1  -5 1451.95   60.49
  -4   1  -5 1727.53   84.79
   4   1   5 1400.16   64.49
  -4  -1   5 1431.26   65.09
   5  -1   5    6.70    4.00
  -5   1   5   11.20    4.40
   5   1  -5    2.40    2.00
  -5   1   5   11.90    2.50
   5  -1   5    4.80    2.00
   5   1   5    5.50    3.30
  -5  -1   5   11.40    5.40
   5   1   5    3.80    3.40
   5  -1  -5    5.90    2.00
  -5  -1   5    6.80    2.00
   5  -1  -5    5.70    2.10
   6  -1   5  271.87   15.30
  -6   1   5  267.87   14.10
   6   1  -5  249.38   22.40
   6   1  -5  282.17   16.80
  -6   1   5  296.97   15.00
  -6   1   5  318.97   21.80
   6  -1   5  271.97   19.50
   6  -1  -5  277.07   17.10
   6   1   5  295.77   18.90
   6   1   5  276.47   15.20
  -6  -1   5  265.17   29.30
   6   1   5  275.77   20.20
  -6  -1   5  276.97   14.40
  -6  -1   5  278.37   14.10
  -7   1   5  256.47   13.00
   7   1  -5  228.48   16.00
   7   1  -5  220.38   17.20
   7  -1   5  261.47   14.10
  -7   1   5  229.28   21.30
   7  -1   5  206.48   19.80
   7  -1  -5  194.48   15.60
   7   1   5  257.07   13.70
  -7  -1   5  206.08   23.00
   7   1   5  184.78   18.30
  -7  -1   5  253.07   12.80
  -7  -1   5  248.18   13.10
  -8   1   5   15.40   18.50
  -8   1   5    8.70    2.60
   8   1  -5   12.70    2.60
   8  -1   5   21.10    3.80
  -8  -1   5   16.90    2.90
   8   1   5   14.80    3.40
   8  -1  -5   15.40    3.70
   9   1  -5   36.00    4.90
  -9   1   5   21.40    3.50
   9  -1   5   29.10    3.80
  -9   1  -5   34.20    4.00
  -9  -1   5   27.50    4.20
   9  -1  -5   30.60    3.80
  10  -1   5  233.18   12.00
 -10  -1  -5  260.67   13.20
  10  -1  -5  249.58   12.80
   0   2   5  221.48   11.80
   0   2  -5  228.48   14.30
   1   2  -5 1146.79   48.60
  -1   2   5 1219.18   48.00
   1   2  -5 1255.17   53.79
  -1   2  -5 1169.48   52.79
   1  -2  -5 1176.18   47.80
  -2   2   5  877.71   36.90
   2   2  -5  838.72   35.70
   2  -2   5  844.22   39.50
  -2   2  -5  850.61   40.30
   2  -2  -5  808.62   34.70
   2   2   5  886.01   38.10
   3  -2   5  977.40   41.90
  -3   2   5  925.91   41.90
   3   2  -5  973.80   40.00
  -3   2  -5  879.21   45.00
  -3  -2   5  914.41   43.20
   3   2   5  951.80   42.70
   3  -2  -5  978.30   39.00
   4   2  -5  194.18   11.10
  -4   2   5  190.58   13.60
   4  -2   5  197.88   13.10
  -4   2  -5  168.88   16.30
   4   2   5  191.18   13.50
  -4  -2   5  197.78   14.60
   4  -2  -5  199.58   10.70
  -5   2   5  328.27   18.70
   5  -2   5  362.26   20.90
   5   2  -5  346.77   18.40
   5  -2   5  335.07   17.90
  -5   2   5  345.07   17.30
  -5   2   5  365.96   22.10
   5   2   5  358.76   20.70
   5  -2  -5  343.17   18.10
  -5  -2   5  342.57   18.60
   5   2   5  343.87   21.70
   5  -2  -5  341.97   17.90
  -5  -2   5  369.56   23.70
  -6   2   5   47.70    4.70
   6  -2   5   25.00    7.60
   6   2  -5   38.20    5.90
   6  -2   5   37.90    4.80
   6   2  -5   52.69    6.20
   6   2  -5   36.70    6.90
  -6   2   5   45.10    8.80
   6   2   5   44.00    9.00
   6   2   5   45.10    7.00
  -6  -2   5   59.49   13.30
  -6  -2   5   44.30    4.70
   6  -2  -5   27.00    7.00
  -6  -2   5   35.50    4.00
  -7   2   5  567.94   25.80
   7   2  -5  539.15   29.50
   7   2  -5  516.85   27.90
  -7   2   5  488.15   40.60
   7  -2   5  570.94   26.90
  -7  -2   5  561.54   25.20
  -7  -2   5  602.04   29.80
  -7  -2   5  618.54   49.80
   7   2   5  539.35   30.40
   8  -2   5  106.89    7.90
   8   2  -5   90.59    6.70
  -8   2   5   84.19    6.80
  -8   2   5   72.59   26.40
  -8   2  -5  107.79    7.80
  -8  -2   5   84.89    6.40
   8  -2  -5  106.49    7.80
   9  -2   5   13.60    2.70
  -9   2   5   14.90    2.70
   9   2  -5   12.40    3.20
  -9   2  -5   13.30    3.00
   9  -2  -5    9.30    2.20
  -9  -2   5    8.40    2.20
  10  -2   5   38.50    3.40
 -10  -2  -5   52.09    3.90
  10  -2  -5   45.70    3.60
 -10   2  -5   50.49    3.90
   0   3   5 8340.97  312.87
   0  -3  -5 7842.62  310.47
   0   3  -5 7830.92  311.77
   1   3  -5 2316.37   93.99
  -1   3   5 2335.47   93.19
   1   3  -5 2453.95  100.59
  -1   3  -5 2362.66  100.19
   1  -3  -5 2223.88   92.29
   1   3   5 2473.15   95.99
  -2   3   5  522.15   23.20
   2   3  -5  488.45   22.20
   2   3  -5  471.55   27.70
   2  -3  -5  501.65   20.70
  -2   3  -5  491.35   27.50
   2   3   5  491.95   24.40
  -3   3   5  125.39    9.40
   3  -3   5  129.59    8.90
   3   3  -5  119.89    7.70
   3   3   5  115.19    9.80
  -3  -3   5  125.19   10.70
  -3   3  -5  117.39   11.80
   3  -3  -5  109.99    8.00
  -4   3   5 1871.81   77.49
   4   3  -5 1885.41   73.69
   4  -3   5 1821.22   74.99
   4  -3  -5 1616.94   71.09
   4  -3  -5 1825.82   72.69
   4   3   5 1749.82   77.59
  -4  -3   5 1808.02   79.79
  -4   3  -5 1702.13   81.79
  -5   3   5  210.88   12.10
   5   3  -5  228.18   13.50
  -5   3   5  237.38   17.30
   5   3  -5  201.48   13.50
   5  -3   5  226.78   15.10
  -5   3   5  223.88   12.10
   5  -3   5  204.58   12.60
   5   3   5  216.68   16.50
  -5  -3   5  197.78   11.30
  -5  -3   5  229.08   19.00
   5   3   5  225.48   15.20
  -5  -3   5  213.98   11.60
   6   3  -5   19.80    5.30
  -6   3   5   34.70   10.30
   6   3  -5   23.00    4.90
   6  -3   5   31.10    4.50
  -6   3   5   28.00    3.80
   6   3   5   27.40    6.80
  -6  -3   5   32.30    4.50
  -6   3  -5   28.20    4.00
  -6  -3   5   28.40   11.30
   7   3  -5  807.12   40.90
   7  -3   5  766.92   34.90
   7   3  -5  650.83   35.60
   7   3  -5  751.32   37.90
  -7   3   5  773.22   43.40
  -7   3   5  794.42   34.00
   7   3   5  753.92   42.70
  -7   3  -5  816.32   35.30
  -7  -3   5  749.62   33.10
   7   3   5  708.63   38.10
   8  -3   5   98.59    7.50
   8   3  -5   68.09    8.00
  -8   3   5   91.39    6.70
  -8  -3   5   85.19    6.30
  -8   3  -5   98.59    7.50
   8   3   5   85.99    9.30
   8  -3  -5   90.69    7.30
   9  -3   5   41.40    4.20
   9  -3  -5   30.80    3.70
  -9  -3   5   24.20    3.20
  -9   3  -5   36.40    3.90
  10  -3   5  188.58    9.80
 -10   3  -5  203.38   10.30
  10  -3  -5  234.68   11.20
   0   4   5 3336.37  131.39
   0   4  -5 3307.87  137.79
   0   4  -5 3234.58  130.19
   1   4  -5  498.65   23.00
  -1   4   5  529.15   23.00
   1   4  -5  538.35   29.80
  -1   4  -5  501.95   29.10
   1   4   5  526.55   25.00
  -1   4  -5  528.95   23.40
   2   4  -5  392.66   25.40
   2   4  -5  421.66   19.20
  -2   4   5  419.06   20.30
  -2   4  -5  387.96   25.10
   2   4   5  421.46   21.80
   3   4  -5  224.68   12.00
  -3   4   5  231.18   14.30
  -3  -4   5  227.48   16.60
   3   4   5  213.88   14.70
  -3   4  -5  215.78   18.20
   3  -4  -5  195.88   10.30
  -4   4   5  344.07   17.10
   4   4  -5  354.16   17.40
  -4   4   5  329.07   15.90
   4  -4   5  305.87   18.90
  -4   4   5  275.17   21.00
  -4   4  -5  319.47   17.40
  -4  -4   5  307.67   15.60
  -4   4  -5  338.07   24.80
  -4  -4   5  331.07   16.00
   4   4   5  356.06   21.30
  -4  -4   5  330.77   22.80
   5   4  -5  104.09    9.00
  -5   4   5  119.99   12.40
   5   4  -5  114.09   11.00
   5   4  -5  111.19    9.40
   5  -4   5  109.19    8.30
  -5   4   5  106.89    7.90
  -5   4   5  116.09    7.60
   5   4   5  114.49   10.30
  -5   4  -5  123.09   26.20
  -5  -4   5  115.89    7.50
  -5   4  -5  107.39    8.60
  -5  -4   5  117.29    7.50
   5   4   5  107.79   11.90
  -5  -4   5  138.29   17.80
  -6   4   5  445.16   21.80
  -6   4   5  458.65   21.10
  -6   4   5  443.26   28.60
   6   4  -5  435.26   24.30
   6   4  -5  403.86   23.40
   6  -4   5  442.16   22.70
   6   4  -5  465.75   27.20
   6   4   5  465.45   25.90
  -6  -4   5  453.95   23.40
  -6  -4   5  460.75   21.20
   6   4   5  421.86   28.60
  -6   4  -5  457.15   23.00
   7  -4   5   18.50    3.80
   7   4  -5   16.10    4.50
  -7   4   5   22.40    3.60
   7   4  -5   10.20    6.60
   7   4  -5    4.60    5.90
   7  -4  -5   15.40    3.20
  -7   4  -5   26.20    4.80
   7   4   5    9.70    3.80
  -7  -4   5   17.70    3.20
   7   4   5   22.10    8.60
  -8   4   5   21.10    3.30
   8   4  -5   21.40    4.30
   8  -4   5   28.00    4.10
   8  -4  -5   30.80    4.10
   8   4   5   26.90    5.40
  -8  -4   5   23.10    3.10
  -8   4  -5   31.70    3.90
   9  -4   5   95.59    6.70
   9  -4  -5  104.59    7.00
  -9  -4   5   92.29    6.80
  -9   4  -5  107.39    7.00
   0   5  -5   21.60    3.00
   0   5  -5   27.30    7.40
   0   5   5   24.10    4.10
  -1   5   5  690.33   29.70
   1   5  -5  688.93   37.60
   1   5  -5  658.03   29.20
   1   5   5  678.53   31.50
  -1   5  -5  669.93   29.30
  -1   5  -5  636.64   39.50
   2   5  -5   83.69   10.70
  -2   5   5   93.19    7.70
   2   5  -5   91.39    6.50
   2   5   5   87.59    8.40
  -2   5  -5   85.49   11.20
  -2   5  -5   94.99    6.80
  -3   5   5  218.38   17.70
   3  -5   5  163.18   10.90
   3   5  -5  169.68   14.60
   3   5  -5  201.08   11.30
  -3   5   5  192.58   11.70
   3   5   5  200.38   12.90
  -3  -5   5  183.88   10.30
  -3  -5   5  187.38   16.80
  -3   5  -5  174.18   17.50
  -3  -5   5  177.18   10.40
   3   5   5  204.68   14.70
   4   5  -5   98.59    9.00
  -4   5   5  102.39    7.00
   4  -5   5   96.09    7.80
  -4   5   5   98.49    7.60
   4   5  -5  106.59    8.30
  -4   5   5   81.49    9.00
  -4   5   5  100.99   10.50
  -4  -5   5   75.29   14.60
  -4   5  -5   95.29    8.10
  -4   5  -5  107.49   14.30
   4   5   5  113.09    9.60
  -4  -5   5   88.09    6.60
  -4  -5   5   99.99    6.70
   4   5   5   98.89   11.00
   5   5  -5  491.35   30.30
  -5   5   5  604.54   27.40
   5  -5   5  549.54   27.50
   5   5  -5  598.34   29.60
   5   5  -5  614.54   32.50
  -5   5   5  586.04   28.00
  -5   5   5  477.25   33.80
  -5  -5   5  595.04   25.80
   5   5   5  621.04   30.90
  -5  -5   5  588.24   26.30
  -5   5  -5  504.65   38.80
  -5   5  -5  607.04   28.50
   5   5   5  582.64   33.90
   6   5  -5  109.69   12.50
  -6   5   5  130.29    8.30
  -6   5   5  127.19    8.90
   6   5  -5  115.19   10.10
   6   5  -5  120.19   11.50
   6  -5   5  128.19    9.40
  -6   5   5  103.79   13.80
  -6  -5   5  129.59    8.20
  -6  -5   5  115.99    7.90
   6  -5  -5  120.59    8.90
   6   5   5  135.09   11.60
   6   5   5  122.39   15.00
  -6   5  -5  126.89    9.70
  -7   5   5   19.50    3.10
   7  -5   5   29.00    4.40
   7   5  -5   29.70    5.30
  -7   5   5   30.20    4.10
  -7   5  -5   27.40    4.40
   7  -5  -5   23.50    3.90
   7   5   5   31.40    5.70
  -7  -5   5   32.50    3.70
   8   5  -5   22.80    4.20
   8  -5   5   28.90    3.90
  -8  -5   5   24.80    3.20
   8  -5  -5   25.90    3.60
   8   5   5   19.30    4.50
  -8   5  -5   24.60    3.70
   9   5  -5   18.00    4.30
   9  -5   5   22.50    2.80
   9  -5  -5   22.10    3.00
  -9   5  -5   26.70    3.30
   0   6   5  250.87   13.00
   0   6   5  233.88   13.90
   0   6  -5  233.18   14.30
   0   6  -5  259.17   12.80
   0   6  -5  243.68   15.50
   0   6  -5  237.78   20.00
   0  -6   5  265.77   16.00
   1   6  -5  423.16   28.30
  -1   6   5  371.16   20.60
   1   6  -5  408.96   19.20
  -1   6   5  414.96   19.70
   1   6  -5  383.56   20.50
   1   6   5  415.66   20.60
  -1   6  -5  414.96   19.00
  -1   6  -5  387.16   20.90
   1   6   5  421.46   21.80
  -1  -6   5  412.16   21.20
  -1   6  -5  432.96   28.60
   2   6  -5  368.66   18.90
   2   6  -5  369.26   19.30
  -2   6   5  360.16   19.50
   2   6  -5  349.37   20.70
  -2   6   5  402.96   20.60
   2  -6   5  329.87   18.20
   2   6  -5  394.76   27.40
  -2   6   5  383.46   18.30
   2   6   5  392.36   20.80
  -2   6  -5  371.66   27.30
   2   6   5  399.46   22.10
  -2  -6   5  354.06   17.60
   2   6   5  376.06   19.00
  -2   6  -5  339.17   19.60
  -3   6   5  124.89   10.20
   3  -6   5  130.79    9.30
   3   6  -5  136.79    9.30
  -3   6   5  137.39    8.80
  -3   6   5  138.39   11.80
   3   6  -5  143.09    9.50
   3   6  -5  134.49   10.90
  -3  -6   5  135.69    8.30
  -3   6  -5  120.59    9.90
  -3   6  -5  139.59   16.80
   3   6   5  137.59   13.00
   3   6   5  134.99   10.90
   4   6  -5  200.18   13.10
   4   6  -5  207.78   14.20
   4  -6   5  178.98   12.40
  -4   6   5  197.38   13.00
  -4  -6   5  205.18   12.30
   4   6   5  211.28   18.20
  -4   6  -5  221.98   22.90
   4   6   5  194.88   16.80
  -4  -6   5  199.08   11.10
   4  -6  -5  185.58   11.60
  -4   6  -5  221.18   15.40
  -5   6   5  314.57   18.10
  -5   6   5  309.07   23.30
   5   6  -5  323.97   22.40
   5   6  -5  342.47   19.80
   5   6  -5  327.47   19.40
  -5   6   5  337.37   16.90
   5  -6   5  316.87   17.90
  -5  -6   5  330.87   16.60
  -5  -6   5  323.17   16.00
   5  -6  -5  333.97   17.50
  -5   6  -5  311.77   18.50
  -5   6  -5  352.96   38.90
   5   6   5  324.67   20.10
   5   6   5  306.77   24.20
  -6   6   5  155.68   16.60
   6  -6   5  170.78   11.60
  -6   6   5  168.78   11.00
   6   6  -5  180.78   13.00
   6  -6  -5  185.28   11.60
  -6  -6   5  189.18   13.60
  -6  -6   5  188.38   10.70
   6   6   5  191.98   14.10
  -6   6  -5  183.98   12.50
   7  -6   5    9.90    2.40
   7   6  -5   11.60    3.30
  -7   6   5   10.60    2.20
  -7   6  -5   16.40    3.50
   7  -6  -5    9.60    2.50
  -7  -6   5    5.60    1.90
   7   6   5   12.50    3.50
   8   6  -5  153.58   10.50
   8  -6   5  199.68   11.00
  -8  -6   5  165.68    8.70
   8   6   5  137.69   12.10
   8  -6  -5  180.68   10.00
   9  -6   5    0.20    1.10
  -9   6  -5    3.00    1.40
   9  -6  -5    2.30    1.10
   0  -7   5   19.20    3.00
   0   7  -5   18.00    4.10
   0   7   5   14.50    3.20
   0   7  -5   14.50    6.60
   0   7  -5   21.70    4.20
   0   7   5   16.40    3.10
  -1   7   5  643.44   28.50
  -1   7   5  600.74   29.50
   1   7  -5  583.44   38.10
   1   7  -5  617.64   29.70
   1   7  -5  579.14   31.00
   1   7  -5  725.03   32.20
   1   7   5  615.44   27.80
   1   7   5  633.84   29.50
  -1  -7   5  613.54   27.90
  -1   7  -5  596.04   39.20
  -1   7  -5  610.84   31.20
  -1   7  -5  599.34   30.10
  -2   7   5  164.38   10.10
   2   7  -5  158.68   12.40
  -2   7   5  153.98   11.20
  -2   7   5  168.68   11.60
   2   7  -5  165.38   11.20
   2  -7   5  149.69   10.30
   2   7  -5  190.58   16.30
   2   7   5  186.98   12.80
  -2   7  -5  171.58   12.50
  -2  -7   5  160.58    9.70
   2   7   5  167.78   11.00
   2   7   5  152.68   14.00
  -2   7  -5  157.38   11.70
  -2   7  -5  147.79   18.90
   3  -7   5  233.68   17.20
   3   7  -5  272.57   19.40
  -3   7   5  270.97   14.60
  -3   7   5  265.17   17.70
   3   7  -5  267.37   17.10
   3   7  -5  297.37   19.50
  -3   7  -5  267.67   16.30
   3   7   5  251.57   26.20
  -3   7  -5  249.18   16.40
  -3  -7   5  270.77   14.30
  -3  -7   5  264.57   13.90
  -4   7   5    2.60    5.00
   4   7  -5    0.40    5.40
   4   7  -5    2.70    2.20
   4  -7   5    1.00    1.50
  -4   7   5    0.80    2.30
   4   7  -5    6.10    5.00
  -4   7   5    1.40    1.80
   4   7   5    2.20    7.10
   4  -7  -5    2.40    2.20
  -4  -7   5    2.40    1.70
   4   7   5   -0.10    2.80
  -4  -7   5    2.10    1.60
  -4   7  -5    2.00    3.10
   5   7  -5    9.20    3.10
   5   7  -5    2.00    7.20
   5  -7   5    3.60    2.20
  -5   7   5    5.10    4.00
  -5   7   5    4.50    1.80
  -5   7   5    6.00    6.60
   5   7   5    6.90    3.30
   5  -7  -5    5.90    2.70
  -5  -7   5    5.20    2.40
  -5  -7   5    7.30    2.20
  -5   7  -5    3.80    2.20
   6  -7   5   22.60    4.20
  -6   7   5   21.90    3.10
   6  -7   5   18.40    2.90
   6   7  -5   19.60    4.10
  -6  -7   5   12.30    2.60
   6  -7  -5   18.30    3.30
   6   7   5   16.80    3.90
  -6   7  -5   16.90    3.80
   7  -7   5    7.80    2.40
  -7   7   5    5.80    1.60
   7   7  -5    2.60    2.00
   7   7   5    5.90    2.60
   7  -7  -5    7.90    2.30
  -7   7  -5    2.30    1.60
  -7  -7   5    5.60    2.00
   8   7  -5   77.99    6.50
   8  -7   5   97.19    6.40
  -8  -7   5   87.89    5.00
   8  -7  -5   91.59    7.30
  -8   7  -5  104.79    7.10
   0   8   5    7.10    2.70
   0   8  -5   12.20    8.10
   0   8  -5    7.30    2.40
   0  -8   5    3.40    1.50
   0   8   5    5.50    2.10
   0   8  -5    2.50    2.50
  -1   8   5  503.25   25.00
   1  -8   5  489.55   23.50
   1   8  -5  436.46   33.60
   1   8  -5  488.25   26.50
   1   8  -5  488.35   24.90
  -1   8   5  503.25   23.60
  -1   8  -5  482.25   25.40
  -1  -8   5  490.75   23.10
   1   8   5  513.05   24.70
  -1   8  -5  456.25   34.60
  -1   8  -5  457.95   25.90
   1   8   5  508.75   23.00
  -2   8   5  353.26   17.50
   2   8  -5  318.47   22.20
  -2   8   5  325.97   18.40
   2   8  -5  324.17   17.90
   2   8  -5  322.97   19.80
  -2   8  -5  307.77   18.90
  -2   8  -5  290.97   33.00
  -2  -8   5  332.47   16.70
  -2   8  -5  314.27   19.20
   2   8   5  342.87   18.10
   3   8  -5 1632.84   70.49
   3   8  -5 1711.83   75.89
   3  -8   5 1541.75   66.39
   3   8  -5 1621.44   67.59
  -3   8   5 1636.94   68.89
  -3   8   5 1627.64   67.09
  -3   8   5 1507.35   67.59
  -3  -8   5 1631.14   66.29
   3   8   5 1564.44   69.79
  -3   8  -5 1644.74   69.79
  -3  -8   5 1589.64   66.59
  -3   8  -5 1543.05   84.09
  -4   8   5  259.97   16.80
   4   8  -5  230.18   15.80
   4  -8   5  248.18   14.70
  -4   8   5  233.88   13.20
  -4   8   5  193.08   18.40
  -4   8  -5  225.38   15.00
  -4  -8   5  228.28   12.80
   5  -8   5    7.20    2.50
   5  -8   5    9.60    2.20
  -5   8   5    6.40    2.10
   5   8  -5   12.20    3.80
  -5  -8   5    8.40    2.30
  -5  -8   5   12.70    2.50
   5   8   5    6.20    3.20
  -5   8  -5    9.10    2.90
   5  -8  -5    8.50    3.10
   6  -8   5   -0.10    1.20
   6  -8   5    2.70    2.30
  -6   8   5    0.50    1.20
   6   8  -5    2.00    2.10
  -6   8  -5    4.30    2.40
  -6  -8   5    2.40    1.40
   6   8   5    4.30    2.70
   6  -8  -5    1.40    2.50
   7   8  -5  231.18   13.60
   7  -8   5  246.78   12.40
  -7  -8   5  257.47   12.40
   7   8   5  233.28   14.20
  -7   8  -5  251.17   13.20
   7  -8  -5  244.38   11.50
   0   9  -5  607.84   30.60
   0   9   5  636.04   28.60
   0  -9   5  603.54   28.60
   0   9  -5  612.54   31.30
   0   9   5  667.33   30.50
  -1   9   5  430.76   21.90
   1   9  -5  407.26   21.50
  -1   9   5  415.86   20.20
   1  -9   5  417.66   20.40
   1   9  -5  387.26   22.40
  -1   9  -5  380.86   33.00
  -1  -9   5  407.86   19.90
  -1   9  -5  408.86   22.20
   1   9   5  406.86   21.20
  -1   9  -5  382.46   22.20
   1   9   5  405.86   19.20
  -2   9   5   81.29   11.50
   2   9  -5   62.19    9.10
  -2   9   5   71.79    7.60
   2  -9   5   86.89    7.50
   2   9   5   95.09    9.40
  -2   9  -5   83.29    8.80
  -2  -9   5   77.09    8.50
   3   9  -5  106.59    8.30
   3  -9   5  110.19    8.00
  -3   9   5  117.29    8.30
  -3   9   5  122.29    9.20
   3   9  -5  121.19   10.10
  -3   9  -5  114.39    9.50
  -3  -9   5  113.59    7.50
  -3  -9   5  115.39    7.90
  -4  -9  -5   89.69    6.00
   4   9  -5   99.29    8.50
  -4   9   5   95.19    7.50
  -4   9   5   83.29    6.50
   4  -9   5   93.09    6.60
  -4  -9   5   85.99    6.50
  -4  -9   5   83.19    5.90
  -4   9  -5   96.29    8.10
   4   9   5   88.49    9.00
   5   9  -5   85.49    7.40
   5  -9   5   89.39    6.40
  -5   9   5   76.89    5.60
  -5   9   5   82.39    8.30
  -5   9  -5   72.19    6.70
  -5  -9   5   79.79    5.70
   5   9   5   65.59    7.20
   6   9  -5  171.48   10.70
   6  -9   5  151.98    7.60
  -6   9   5  159.78    8.40
  -6  -9   5  171.08    8.50
  -6   9  -5  176.68   10.20
   6   9   5  138.39   11.40
   0  10   5   25.70    3.80
   0  10  -5   30.10    4.70
   0  10  -5   21.80    3.90
   0  10   5   17.10    2.90
   0 -10   5   30.30    3.60
   1  10  -5  184.58   12.00
  -1  10   5  179.98   10.20
   1 -10   5  173.38   10.40
  -1  10   5  179.08   11.20
   1  10  -5  159.28   10.70
  -1 -10  -5  166.18    9.20
  -1 -10   5  169.88   10.10
   1  10   5  162.08   10.80
  -1  10  -5  168.08   11.40
   2  10  -5  192.28   12.20
   2  10  -5  169.58   10.60
   2 -10   5  189.58   10.80
  -2  10   5  182.58   11.30
  -2  10   5  174.58   10.30
  -2 -10   5  181.38   10.50
  -2  10  -5  179.48   12.10
  -2 -10   5  178.98   10.20
  -3  10   5  153.28    9.30
  -3  10   5  172.38   11.50
   3  10  -5  168.58   11.40
   3 -10   5  163.88    9.60
  -3  10  -5  151.18   10.80
  -3 -10   5  180.98   10.40
  -3 -10   5  159.28    9.40
  -4  10   5   41.30    4.70
  -4  10   5   44.40    4.60
   4 -10   5   47.60    4.10
   4  10  -5   58.39    5.60
  -4 -10   5   51.29    4.60
  -5  10   5   60.29    4.50
   5  10  -5   77.69    6.00
   5 -10   5   80.79    5.40
  -5  10  -5   70.99    5.70
  -5 -10   5   67.79    4.60
   0  11   5    1.60    1.30
   0  11  -5   -1.80    1.10
   0 -11   5   -0.20    0.90
   0 -11  -5   -1.00    2.00
  -1  11   5   40.90    4.10
  -1  11   5   36.30    3.30
   1  11  -5   42.40    4.40
   1 -11   5   34.70    5.10
   1  11  -5   37.00    3.80
  -1  11  -5   38.30    4.00
  -1 -11   5   39.10    3.70
  -1 -11   5   38.60    3.70
  -2  11   5   46.70    4.00
   2  11  -5   60.59    5.50
  -2  11   5   59.59    6.40
   2 -11   5   47.30    4.10
  -2 -11   5   51.19    4.20
  -2  11  -5   52.09    5.00
  -2 -11   5   50.49    3.90
   3  11  -5  286.37   14.30
   3 -11   5  302.97   13.60
  -3 -11  -5  261.67   12.20
  -3  11   5  263.57   13.10
  -3  11   5  284.57   13.00
  -3 -11   5  283.57   12.50
  -3 -11   5  280.37   13.30
  -3  11  -5  281.47   14.40
   4  11  -5   44.00    3.90
   4 -11   5   38.30    3.10
  -4 -11   5   44.70    3.30
  -4  11  -5   42.70    3.80
   0  12  -5   12.60    1.90
   0 -12   5   14.90    1.80
   0 -12   5   18.00    2.10
   1 -12   5   20.50    2.50
   1 -12   5   18.30    2.30
  -1 -12   5   16.50    1.90
  -1 -12   5   21.30    2.00
  -1  12  -5   16.60    2.20
   0   0   6 2450.05   97.69
   1   0   6 4062.09  152.88
   1   0   6 4002.00  154.68
   1   0  -6 3645.04  152.68
  -1   0   6 3825.52  154.38
   2   0   6  127.19    8.10
   2   0   6  122.29    8.80
   2   0  -6  122.29    7.10
  -2   0   6  112.99    7.90
  -2   0   6  112.19   10.50
   3   0  -6 6459.95  247.68
   3   0   6 6313.47  250.97
   3   0   6 6215.08  250.47
  -4   0   6  216.28   14.70
   4   0   6  201.08   16.60
   4   0   6  201.08   14.20
   4   0  -6  204.58   11.40
   5   0   6  149.79   12.40
  -5   0   6  116.79    7.90
  -5   0   6  117.29   11.90
   5   0  -6  131.09    9.00
  -5   0   6  132.59    8.00
   5   0   6  114.29    8.50
  -6   0   6   16.30    3.00
   6   0  -6   13.10    6.00
  -6   0   6    7.80    7.10
   6   0   6   13.80    3.10
   6   0   6    7.30    5.10
   6   0  -6   21.00    4.80
  -6   0   6   14.70    3.10
  -7   0   6    0.20    2.10
   7   0  -6   -1.00    4.30
   7   0   6   -7.50    6.50
   7   0   6    5.10    2.60
  -7   0   6   -0.30    9.90
   7   0  -6    5.20    6.40
  -7   0   6    2.10    1.70
  -8   0   6   84.09    6.50
   8   0   6   90.29    7.20
   8   0  -6   87.99    7.00
   9   0   6   -0.90    1.50
  -9   0   6   -1.40    1.50
   9   0  -6    2.10    1.50
  10   0  -6   21.90    2.90
 -10   0  -6   19.30    2.50
   0   1   6  117.09    5.70
   0   1   6  124.69   10.10
   0   1   6  125.59    5.80
   0  -1   6  125.19    8.90
   1  -1   6 3501.05  135.49
   1   1  -6 3341.07  133.69
   1   1  -6 3145.49  137.89
  -1   1   6 3253.17  133.09
   1  -1   6 3491.75  135.49
   1  -1  -6 3435.76  133.29
   1   1   6 3476.25  131.79
   1   1   6 3445.06  135.59
   2  -1   6  498.75   23.70
   2   1  -6  496.25   21.60
   2  -1   6  455.25   23.40
  -2   1   6  444.36   23.60
   2  -1  -6  486.55   21.10
  -2  -1   6  481.15   23.20
   2   1   6  497.55   21.20
   2   1   6  463.95   23.50
   3  -1   6 1107.09   57.09
   3  -1   6 1227.28   52.49
   3   1  -6 1177.38   49.60
  -3   1   6 1171.88   51.59
   3   1   6 1218.68   52.79
   3  -1  -6 1193.68   49.10
  -3  -1   6 1195.28   52.59
   3   1   6 1235.38   50.89
   4  -1   6  427.86   23.40
  -4   1   6  436.66   23.50
   4   1  -6  441.16   20.60
  -4  -1   6  427.86   24.00
   4   1   6  417.36   23.20
   4   1   6  390.16   23.40
   4  -1  -6  436.56   20.10
   5  -1   6   46.80    7.70
  -5   1   6   40.10    4.20
   5  -1   6   42.50    7.40
   5   1  -6   46.50    5.20
  -5   1   6   51.79    7.70
  -5   1   6   36.60    5.40
  -5  -1   6   45.80    4.40
  -5  -1   6   45.00    8.40
   5  -1  -6   48.60    5.30
   5   1   6   38.70    7.10
  -5  -1   6   43.90    4.40
   5   1   6   52.09    7.70
  -6   1   6  187.98   10.40
   6   1  -6  174.98   14.00
   6  -1   6  173.68   11.20
  -6   1   6  188.98   16.10
  -6   1   6  178.08   10.60
   6   1  -6  179.08   12.50
   6  -1   6  168.08   20.40
   6   1   6  190.78   14.40
  -6  -1   6  172.58   10.30
   6   1   6  149.88   10.70
  -6  -1   6  187.78   10.20
   6  -1  -6  169.68   13.00
   6   1   6  161.28   15.50
  -6  -1   6  167.18   16.10
   6  -1  -6  160.98   12.00
   7   1  -6  119.39   13.20
   7  -1   6  120.49    8.90
   7   1  -6  111.79   11.10
  -7   1   6  130.09    8.40
  -7   1   6  136.09   17.20
  -7  -1   6  120.19    8.20
  -7  -1   6  114.69    8.00
  -7  -1   6  154.38   22.10
   7   1   6  121.89    8.60
   7   1   6  110.69   14.60
   7  -1  -6  100.89   11.30
   8   1  -6  128.29    8.40
  -8   1   6  121.99    8.10
   8  -1   6  123.89    8.70
   8  -1  -6  126.49    8.80
  -8  -1   6  118.79    7.80
   8   1   6  115.69    8.30
  -9   1   6   63.79    5.30
   9  -1   6   98.89    7.10
   9   1  -6   80.79    5.60
  -9  -1   6   73.69    5.40
  -9   1  -6   85.09    6.60
   9  -1  -6   83.29    6.10
 -10  -1  -6   51.19    4.00
 -10   1  -6   56.59    4.20
  10  -1  -6   49.20    3.70
   0   2   6   13.90    2.80
   0   2  -6   11.60    2.00
   0   2  -6    9.60    4.10
  -1   2   6  190.78    9.80
   1   2  -6  206.28   10.80
   1   2  -6  206.38   14.70
  -1   2   6  214.78    9.60
   1   2   6  202.58   12.10
  -1   2  -6  197.28   14.10
   1  -2  -6  207.48   10.00
  -2   2   6  232.48   14.90
  -2   2   6  236.98   12.80
   2   2  -6  254.27   12.60
   2  -2   6  247.48   14.10
   2   2   6  253.87   14.70
  -2   2  -6  239.88   16.40
  -3   2   6  658.13   31.00
   3   2  -6  653.23   29.30
   3  -2   6  688.83   31.80
  -3  -2   6  644.34   32.50
   3   2   6  666.63   32.40
   3  -2  -6  672.73   28.30
  -3   2  -6  642.64   35.20
   4   2  -6  605.44   27.30
  -4   2   6  586.94   30.00
   4  -2   6  571.34   29.70
   4   2   6  577.94   30.90
   4  -2  -6  594.74   26.40
  -4  -2   6  600.24   31.70
  -5   2   6   31.60    4.20
   5  -2   6   31.20    4.30
   5   2  -6   30.30    4.50
   5  -2   6   34.50    7.60
   5   2  -6   31.30    5.50
  -5   2   6   43.40    7.80
  -5   2   6   30.30    3.80
  -5   2   6   37.80    3.90
   5   2   6   40.70    6.90
   5   2   6   22.60    5.80
   5  -2  -6   20.80    4.80
   5  -2  -6   39.30    4.80
  -5  -2   6   26.30    3.60
  -5  -2   6   37.90    8.60
  -6   2   6   49.60    5.20
  -6   2   6   54.89    7.20
   6   2  -6   47.10    6.30
   6   2  -6   43.60    7.60
  -6   2   6   47.50    8.90
   6  -2   6   37.80   11.00
   6  -2  -6   32.70    6.30
   6   2   6   45.80   12.30
  -6  -2   6   47.70    4.80
  -6  -2   6   46.40    5.90
  -6  -2   6   42.40   10.90
   7  -2   6  242.48   13.50
  -7   2   6  209.38   20.10
  -7   2   6  227.88   12.60
   7   2  -6  211.48   14.30
   7   2  -6  217.28   15.80
   7   2  -6  203.28   17.50
  -7  -2   6  227.78   24.30
   7   2   6  189.58   19.10
   7  -2  -6  188.18   15.90
  -7  -2   6  238.18   12.20
   7   2   6  182.88   15.40
  -7  -2   6  232.38   12.10
   8   2  -6  104.79    7.10
   8  -2   6  106.79    8.00
  -8   2   6  100.09    7.20
  -8  -2   6  107.19    7.00
   8  -2  -6  105.89    8.00
  -8   2  -6  105.19    7.90
   9   2  -6   21.30    4.70
  -9   2   6   21.70    3.00
   9  -2   6   19.10    3.90
  -9   2  -6   28.20    3.60
   9  -2  -6   26.90    3.40
  -9  -2   6   25.80    3.10
  10  -2   6   44.50    4.20
 -10  -2  -6   57.09    5.00
  10  -2  -6   49.90    3.70
 -10   2  -6   54.09    5.30
   0  -3  -6 1159.38   47.20
   0   3  -6 1192.58   54.69
   0   3   6 1182.18   49.50
   0   3  -6 1127.49   48.40
  -1   3   6  286.87   13.00
   1   3  -6  305.37   20.20
   1   3  -6  296.87   14.80
  -1   3   6  292.97   12.90
   1   3   6  319.17   16.60
  -1   3  -6  297.47   19.70
   1  -3  -6  307.07   13.40
   2   3  -6 2278.67  100.79
  -2   3   6 2366.36   93.09
   2   3  -6 2272.07   92.79
   2   3   6 2376.36   95.89
  -2   3  -6 2286.57  100.29
   2  -3  -6 2269.67   90.99
   3   3  -6  299.97   14.90
  -3   3   6  271.07   16.00
  -3  -3   6  282.67   18.40
  -3   3  -6  286.87   20.80
   3  -3  -6  288.77   13.50
   3   3   6  272.77   17.40
   4   3  -6  164.38   10.30
  -4   3   6  147.19    9.70
   4  -3   6  158.58   11.80
  -4   3   6  170.88   12.60
   4  -3   6  148.49    9.90
  -4   3   6  157.48    9.60
  -4   3   6  164.78    9.90
   4  -3  -6  158.58    9.50
   4   3   6  160.08   13.20
  -4  -3   6  150.98    9.10
   4   3   6  166.58   12.40
  -4  -3   6  163.78   14.00
  -4  -3   6  167.88   11.00
  -5   3   6   25.30    3.50
  -5   3   6   25.30    6.80
  -5   3   6   27.20    3.80
   5  -3   6   32.10    4.10
   5  -3   6   22.30    6.10
   5   3  -6   17.50    3.80
   5  -3  -6   31.20    5.50
   5   3   6   33.20    5.70
  -5  -3   6   21.30    3.50
  -5  -3   6   37.40   10.00
   5   3   6   19.20    8.70
  -5  -3   6   29.90    3.40
  -6   3   6  126.89    8.70
  -6   3   6  141.39   14.00
   6   3  -6  119.19   10.20
  -6   3   6  144.69    8.70
   6   3  -6  125.79   12.50
   6   3  -6  123.89   10.80
   6  -3   6  125.49    9.30
  -6  -3   6  128.99   17.20
  -6  -3   6  141.89   11.60
   6   3   6  116.19   11.50
   6   3   6  112.59   13.30
  -6  -3   6  129.59    8.20
   7   3  -6  603.04   33.00
  -7   3   6  666.53   29.20
  -7   3   6  549.35   36.20
   7   3  -6  677.53   36.10
   7   3  -6  617.14   31.20
   7  -3   6  699.33   30.60
  -7  -3   6  670.83   28.40
   7   3   6  557.84   32.80
  -7  -3   6  615.64   28.30
   7   3   6  595.64   37.50
  -7   3  -6  696.73   30.40
   8  -3   6    2.40    1.50
   8   3  -6   -1.50    3.50
  -8   3   6    1.90    1.70
   8  -3  -6    2.00    1.50
  -8  -3   6    0.30    1.50
  -8   3  -6    0.90    1.70
   9  -3   6   10.90    2.40
  -9   3  -6   17.60    2.90
  -9  -3   6   13.50    2.50
   9  -3  -6   21.60    3.60
   0   4  -6 2427.86   98.49
   0  -4  -6 2389.16   95.99
   0   4   6 2468.75   99.59
   0   4  -6 2532.35  106.99
   1   4  -6  967.20   39.80
  -1   4   6  910.11   36.80
   1   4  -6  980.60   47.80
  -1   4  -6  874.71   39.70
   1  -4  -6  897.81   37.10
  -1   4  -6  923.71   47.20
   1   4   6  974.70   42.00
   2   4  -6  472.65   22.00
   2   4  -6  474.15   29.40
  -2   4   6  484.85   22.30
  -2   4  -6  464.25   29.20
   2   4   6  500.25   25.20
   2  -4  -6  442.36   19.40
  -3   4   6   76.09    5.60
   3   4  -6   74.19    7.60
  -3   4   6   94.09    8.00
   3  -4   6   83.19    9.60
  -3   4   6   78.29    6.50
   3   4  -6   84.39    8.70
  -3   4  -6   84.89   11.40
  -3  -4   6   80.69   10.40
   3   4   6   95.49    9.40
  -3  -4   6   72.79    5.60
   3  -4  -6   74.99    5.30
  -4   4   6   31.40    4.50
   4   4  -6   34.90    5.50
   4   4  -6   35.90    4.70
  -4   4   6   43.80    6.90
   4  -4   6   41.90    4.70
  -4   4   6   42.40    4.20
   4   4   6   30.60    6.10
  -4   4  -6   43.80    5.30
   4   4   6   33.70    6.60
   4  -4  -6   32.80    5.00
  -4  -4   6   39.90    4.20
  -4  -4   6   38.00    4.10
  -4  -4   6   39.70    9.00
  -5   4   6  868.71   37.10
  -5   4   6  816.62   35.80
  -5   4   6  834.62   42.50
   5   4  -6  823.92   39.10
   5  -4   6  791.72   37.30
   5   4  -6  903.01   38.90
  -5   4  -6  790.32   37.40
   5   4   6  884.71   41.10
   5   4   6  812.52   43.60
  -5  -4   6  808.22   63.79
  -5  -4   6  836.42   36.00
  -5  -4   6  771.52   35.40
   6   4  -6  323.27   22.00
   6  -4   6  351.56   18.20
   6   4  -6  311.97   19.30
  -6   4   6  314.87   16.10
  -6   4   6  311.47   17.00
  -6   4   6  362.06   30.40
   6   4  -6  326.67   19.00
  -6  -4   6  330.37   16.20
  -6  -4   6  321.57   16.40
   6   4   6  309.97   23.50
  -6   4  -6  327.57   17.90
   6   4   6  299.47   20.10
  -7   4   6    2.00    2.50
   7  -4   6    6.00    2.60
  -7   4   6    2.80    2.20
  -7   4   6   17.00   11.10
   7  -4  -6    1.70    1.50
   7   4   6    2.00    2.50
  -7   4  -6    1.90    1.90
  -7  -4   6    1.80    2.00
   8   4  -6   20.30    4.40
   8  -4   6   30.40    3.90
  -8   4   6   17.10    3.10
  -8   4  -6   27.50    3.70
  -8  -4   6   23.20    3.00
   8  -4  -6   29.70    3.70
   9  -4   6    6.60    1.60
  -9  -4   6    7.70    2.30
   9  -4  -6   12.90    2.30
  -9   4  -6    6.90    1.70
   0   5   6  419.36   21.40
   0   5  -6  451.95   20.70
   1   5  -6  235.48   13.00
   1   5  -6  260.37   20.30
   1   5   6  244.88   14.90
  -1   5  -6  242.28   13.20
   2   5  -6  317.17   15.30
   2   5  -6  302.57   22.60
   2   5  -6  273.77   17.00
  -2   5   6  296.27   15.40
  -2   5   6  311.37   15.50
  -2   5   6  271.27   14.30
  -2   5  -6  259.57   15.00
  -2   5  -6  271.97   22.30
   2   5   6  283.97   15.90
   2   5   6  305.87   18.20
  -2  -5   6  272.87   14.20
  -2   5  -6  269.07   16.00
  -3   5   6   29.80    4.70
   3   5  -6   29.10    5.20
   3  -5   6   16.20    3.00
  -3   5   6   22.20    4.80
   3   5  -6   25.90    4.00
  -3   5   6   25.90    3.40
  -3   5  -6   23.30    4.60
   3   5   6   20.60    5.00
  -3  -5   6   25.80    3.20
  -3   5  -6   27.40    8.70
  -3  -5   6   21.00    3.20
   4   5  -6  620.14   29.30
  -4   5   6  571.74   27.40
  -4   5   6  603.24   31.50
  -4   5   6  565.84   26.40
   4  -5   6  547.65   27.50
   4   5  -6  589.54   29.80
   4   5   6  604.64   30.60
  -4   5  -6  568.14   28.20
  -4  -5   6  565.04   26.00
   4   5   6  570.34   33.00
  -4   5  -6  566.94   40.60
  -4  -5   6  613.64   37.80
  -4  -5   6  584.74   26.30
   5   5  -6  128.99   12.70
   5   5  -6  133.09   11.00
   5   5  -6  141.89   10.90
  -5   5   6  146.19   14.00
  -5   5   6  127.09    8.60
   5  -5   6  134.39    9.80
  -5   5   6  131.19    9.40
  -5  -5   6  139.69    8.70
  -5  -5   6  139.29    8.50
   5   5   6  140.39   12.00
  -5   5  -6  121.99    9.70
   5   5   6  142.19   14.80
   6   5  -6    8.10    7.20
  -6   5   6    4.10    2.10
   6   5  -6    5.30    2.90
   6  -5   6    6.10    2.40
  -6   5   6   -0.90    5.90
   6   5  -6    0.70    6.20
   6   5   6   11.10   10.00
  -6  -5   6    2.20    2.10
  -6   5  -6    3.70    1.80
  -6  -5   6    6.10    2.00
   6   5   6    1.60    3.00
   6  -5  -6    8.40    2.20
  -7   5   6  121.99    8.90
   7  -5   6  133.99    9.70
  -7   5   6  146.89    8.50
  -7  -5   6  140.99    8.50
   7  -5  -6  136.79    9.40
  -7   5  -6  137.69    9.90
   7   5   6  134.19   11.80
   8   5  -6   90.19    8.10
   8  -5   6  110.99    7.70
  -8  -5   6   88.39    8.00
   8  -5  -6  114.19    7.60
  -8   5  -6  121.99    8.10
   9  -5   6  140.69    8.00
   9  -5  -6  120.09    7.50
  -9   5  -6  148.79    8.20
  -9  -5   6  106.69    6.90
   0   6  -6  104.89   13.20
   0   6   6  106.69   10.30
   0   6  -6  101.89    7.20
   0   6   6   87.99    7.70
   0   6  -6  103.29    9.00
   0   6  -6   92.09    8.10
   0  -6   6   93.99    6.90
   1   6  -6  104.39    8.90
   1   6  -6  120.69    8.30
  -1   6   6  116.49    8.90
   1  -6   6  117.69    7.80
   1   6  -6  114.99   14.40
  -1   6   6  121.39    8.00
   1   6  -6  116.89   10.10
   1   6   6  129.69   10.70
  -1   6  -6  124.69    9.40
  -1  -6   6  117.19    7.70
  -1   6  -6  132.39   15.50
  -1   6  -6  119.29    8.10
   1   6   6  123.79    8.00
   1   6   6  113.19   10.10
  -2   6   6   55.09    5.10
   2  -6   6   58.89    5.50
   2   6  -6   48.30    6.40
  -2   6   6   49.99    5.10
  -2   6   6   57.79    6.40
   2   6  -6   37.80    8.30
   2   6  -6   45.60    5.30
  -2   6  -6   50.89    6.30
  -2  -6   6   49.00    4.60
   2   6   6   63.29    8.30
   2   6   6   54.89    8.20
  -2   6  -6   53.19    5.60
   2   6   6   57.29    5.70
  -2   6  -6   54.99   13.30
   3   6  -6  171.78   12.70
   3   6  -6  167.08   10.90
  -3   6   6  171.08   10.10
   3  -6   6  152.28   10.50
  -3   6   6  166.88   12.20
   3   6  -6  173.98   11.10
  -3   6   6  161.48   11.60
   3   6   6  163.38   12.60
  -3   6  -6  157.08   11.70
  -3  -6   6  174.08   10.00
  -3  -6   6  176.28   20.20
  -3  -6   6  166.98    9.90
   3   6   6  179.78   16.10
  -4   6   6   38.60    6.90
   4   6  -6   50.79    6.70
   4   6  -6   59.29    7.50
  -4   6   6   54.29    5.00
   4   6  -6   49.10    8.30
   4  -6   6   42.50    5.30
  -4   6   6   57.89    8.30
   4   6   6   61.79    7.50
   4   6   6   47.80   10.00
  -4   6  -6   47.70    6.00
  -4  -6   6   54.49    5.00
  -4   6  -6   24.40   12.30
  -4  -6   6   52.19    4.90
  -5   6   6  140.09    9.00
   5   6  -6  140.79   11.40
  -5   6   6  127.09   13.20
   5   6  -6  129.29   14.10
   5  -6   6  140.39    8.40
   5  -6   6  140.19   10.00
   5   6  -6  118.29   11.40
  -5   6  -6  139.09   10.60
   5   6   6  137.49   11.70
  -5  -6   6  143.39    8.60
   5   6   6  112.99   16.00
   5  -6  -6  140.99    9.60
  -5  -6   6  149.49    9.10
   6  -6   6  201.88   12.60
  -6   6   6  167.08   10.40
   6   6  -6  170.38   14.10
   6   6   6  170.48   14.80
  -6  -6   6  205.28   11.60
  -6  -6   6  177.48   10.00
   6  -6  -6  185.88   11.50
  -6   6  -6  204.88   15.10
   7  -6   6  133.39    9.30
   7   6  -6  129.99   10.00
  -7   6   6  143.59    8.00
  -7   6  -6  148.19    9.90
   7   6   6  117.99   10.60
  -7  -6   6  130.19    8.10
   7  -6  -6  132.49    8.80
   8   6  -6  119.59    8.90
   8  -6   6  133.29    8.20
  -8  -6   6  127.39    7.10
  -8   6  -6  134.99    8.50
   8  -6  -6  127.69    7.90
   0   7  -6   38.70    9.90
   0   7  -6   41.90    6.00
   0  -7   6   47.20    4.60
   0   7   6   46.70    4.70
   0   7   6   41.10    5.50
   0   7  -6   46.00    5.70
   1   7  -6   24.70    4.50
   1   7  -6   29.40   10.00
   1  -7   6   20.40    3.30
   1   7  -6   35.70    5.30
  -1   7   6   26.70    3.80
  -1   7   6   22.80    4.60
  -1   7  -6   20.10    4.10
   1   7   6   16.30    3.50
  -1   7  -6   25.70    5.40
  -1   7  -6   14.30    8.90
   1   7   6   29.30    4.40
  -1  -7   6   29.20    3.60
   2   7  -6  412.76   25.10
   2   7  -6  442.06   24.70
   2  -7   6  420.26   21.00
  -2   7   6  449.76   22.30
  -2   7   6  424.96   21.50
   2   7  -6  432.16   22.00
   2   7   6  441.86   26.40
  -2  -7   6  405.86   22.40
  -2   7  -6  418.46   34.00
  -2   7  -6  422.46   23.80
   2   7   6  473.55   24.20
  -3   7   6   71.39    7.50
   3   7  -6   78.99   10.40
   3   7  -6   79.69    7.10
   3   7  -6   85.69    9.20
   3  -7   6   67.59    6.60
   3   7  -6   73.59    8.30
  -3   7   6   71.59    7.20
   3   7   6   70.39    8.40
  -3  -7   6   67.99    5.80
  -3   7  -6   68.99   20.90
  -3   7  -6   71.99    7.40
  -3  -7   6   73.49    6.00
   3   7   6   64.59   12.30
   4   7  -6 1345.97   59.09
  -4   7   6 1334.67   56.59
  -4   7   6 1363.16   55.49
   4  -7   6 1337.97   55.09
   4   7  -6 1256.67   57.59
  -4   7   6 1262.47   58.49
   4  -7   6 1286.37   56.19
   4   7   6 1366.86   59.69
  -4   7  -6 1323.87   58.09
  -4  -7   6 1365.56   55.19
  -4  -7   6 1376.76   54.79
   4   7   6 1198.28   63.69
   4  -7  -6 1241.18   54.89
  -4   7  -6 1269.07   75.29
   5  -7   6   79.49   10.30
   5  -7   6   67.49    5.50
   5   7  -6   74.99    9.90
  -5   7  -6   86.99    9.60
   5  -7  -6   75.89    6.30
   5   7   6   44.50   11.50
  -5  -7   6   75.59    6.50
  -5  -7   6   65.49    5.40
   6  -7   6  155.58   10.10
   6   7  -6  165.38   11.30
  -6   7   6  142.39    8.70
  -6   7  -6  146.19   10.50
  -6  -7   6  147.89    8.80
   6  -7  -6  137.79    9.10
   6   7   6  117.79   10.90
   7  -7   6  129.49   10.90
  -7   7   6  131.29    7.20
   7   7  -6  119.69   11.20
   7  -7  -6  132.79    8.20
  -7  -7   6  139.79    8.50
   7   7   6  136.89   12.20
  -7   7  -6  136.59    9.10
   8  -7   6   70.59    4.80
   8   7  -6   58.99    5.80
   8  -7  -6   67.69    4.50
  -8   7  -6   66.69    5.10
  -8  -7   6   60.69    3.80
   0   8   6  107.39    7.90
   0   8  -6  103.69    9.70
   0   8  -6  124.69   19.50
   0   8  -6  100.59    8.80
   0  -8   6  102.29    7.60
   0   8   6  113.39    8.80
  -1   8   6  124.39    9.50
  -1   8   6  137.49    9.00
   1   8  -6  133.59   10.10
   1  -8   6  127.69    8.80
   1   8  -6  132.29   11.10
   1   8  -6  141.39   24.00
  -1   8  -6  168.38   28.90
  -1  -8   6  123.19    8.50
   1   8   6  118.49    8.30
  -1   8  -6  119.39   10.60
   1   8   6  126.29    9.40
  -1   8  -6  119.39   10.00
   2   8  -6   95.69    8.10
   2   8  -6  109.29   10.10
   2   8  -6   89.99   18.80
   2  -8   6  104.99    7.80
  -2   8  -6  110.49   19.30
  -2  -8   6  102.09    7.40
  -2   8  -6   96.09    9.40
  -2   8  -6  103.39    9.10
   2   8   6  113.19    8.70
   3   8  -6   51.49    6.90
  -3   8   6   62.29    6.40
  -3   8   6   57.69    5.60
   3   8  -6   46.40   10.20
   3  -8   6   48.50    5.30
   3   8  -6   48.00    5.40
  -3   8  -6   54.89    6.60
  -3  -8   6   48.70    4.90
   3   8   6   50.89    7.70
  -3   8  -6   54.19    6.50
  -3  -8   6   50.49    4.80
  -3   8  -6   73.69   19.90
   4  -8   6   51.69    5.50
  -4   8   6   59.09    6.30
  -4   8   6   52.89    5.30
   4   8  -6   67.29    7.60
   4  -8   6   58.69    5.10
   4   8   6   45.80    6.90
  -4  -8   6   54.79    5.00
  -4   8  -6   56.49    6.80
  -4  -8   6   63.59    5.40
   5  -8   6  164.18   10.30
   5  -8   6  165.48    9.40
   5   8  -6  169.08   12.10
  -5   8   6  158.58    9.90
   5   8   6  157.18   12.40
  -5  -8   6  194.38    9.70
  -5  -8   6  172.88   10.00
  -5   8  -6  178.18   12.00
   6   8  -6   94.89    8.00
  -6   8   6   82.99    6.80
   6  -8   6   93.19    6.60
  -6  -8   6   91.49    6.00
  -6   8  -6   85.49    7.30
   6  -8  -6   90.09    6.50
   7   8  -6   18.50    3.30
  -7   8   6   18.20    2.20
   7  -8   6   21.90    3.10
  -7   8  -6   26.00    3.50
  -7  -8   6   19.00    2.30
   0   9   6   25.00    4.70
   0   9   6   18.70    4.90
   0   9  -6   27.90    6.30
   0  -9   6   20.50    3.20
   0   9  -6   25.20    4.00
   0   9  -6   35.50   18.20
   1  -9   6   32.30    4.10
   1   9   6   36.20    4.20
  -1   9  -6   33.60    6.80
  -1  -9   6   39.50    4.50
   1   9   6   40.30    6.80
  -1   9  -6   42.50    9.40
   2   9  -6  341.17   19.60
   2   9  -6  309.17   17.20
  -2   9   6  330.77   17.90
   2  -9   6  322.37   16.80
  -2   9   6  324.97   17.00
  -2  -9   6  319.97   16.50
  -2  -9   6  318.67   16.60
  -2   9  -6  340.17   18.90
  -2   9  -6  324.47   18.80
  -3   9   6   58.09    6.10
   3  -9   6   61.59    5.30
  -3   9   6   51.89    5.30
   3   9  -6   65.39    6.90
  -3   9  -6   56.29    6.30
  -3  -9   6   56.49    4.90
  -3  -9   6   51.69    4.90
  -4   9   6  178.98   10.60
  -4   9   6  190.88   11.00
   4   9  -6  198.08   12.90
   4  -9   6  195.58   10.50
  -4  -9   6  190.28   10.00
  -4   9  -6  181.28   12.30
  -4  -9   6  190.18   10.60
   4   9   6  153.28   15.30
   5   9  -6   34.30    4.70
   5  -9   6   40.50    5.60
  -5   9   6   36.60    3.60
   5  -9   6   35.10    3.20
  -5  -9   6   37.10    3.60
  -5   9  -6   41.00    4.80
  -5  -9   6   33.70    4.60
   5   9   6   28.00    5.10
   6   9  -6  112.49    7.90
  -6   9   6  100.69    7.00
  -6   9  -6  112.29    7.60
  -6  -9   6  111.79    6.30
   0  10   6   72.99    5.50
   0  10   6   68.99    6.30
   0  10  -6   74.49    6.60
   0  10  -6   79.09    7.40
   0 -10   6   67.99    5.70
   1  10  -6   90.39    8.10
  -1  10   6   87.59    6.50
  -1  10   6   86.39    7.20
   1 -10   6   83.79    6.50
   1  10  -6   91.49    7.30
   1  10   6   97.19    7.40
  -1  10  -6   84.09    7.50
  -1  10  -6  117.29   11.80
  -1 -10   6   86.69    6.40
  -1 -10   6   93.59    6.60
   2 -10   6   10.00    2.30
  -2  10   6    8.60    2.40
   2  10  -6    9.50    3.00
  -2  10   6    9.00    2.30
  -2  10  -6    7.00    2.90
  -2 -10   6    8.20    2.10
  -2 -10   6    5.20    1.70
  -3  10   6  106.49    7.40
  -3  10   6  129.89    7.80
   3 -10   6  129.99    7.80
   3  10  -6  127.29    9.30
  -3 -10  -6  122.99    7.00
  -3 -10   6  115.29    7.50
  -3  10  -6  122.49    8.80
  -3 -10   6  126.79    7.70
   4 -10   6   31.80    3.10
  -4  10   6   31.10    3.30
   4  10  -6   34.40    4.30
  -4  10  -6   27.10    3.70
  -4 -10   6   33.30    4.10
  -4 -10   6   28.00    3.10
   5 -10   6   10.80    1.80
  -5  10   6   16.50    2.50
   5  10  -6   18.50    3.10
  -5 -10   6   12.70    1.90
  -5  10  -6   12.50    3.20
   0 -11   6   21.20    2.80
   0  11  -6   18.50    2.90
   0 -11  -6   20.50    2.50
   0 -11   6   20.40    2.60
   0  11  -6   24.20    4.60
   1 -11   6   13.80    2.30
   1 -11   6   17.50    2.30
   1  11  -6   13.00    2.50
  -1  11   6   16.30    2.20
   1  11  -6   21.10    3.50
  -1 -11   6   14.50    2.30
  -1  11  -6   14.10    2.50
   1 -11  -6   11.20    2.20
  -1 -11   6   20.10    2.40
   2  11  -6   78.69    5.70
   2 -11   6   71.89    5.10
   2 -11   6   74.49    4.50
  -2  11   6   67.59    4.80
  -2 -11   6   74.09    5.00
  -2 -11   6   70.79    5.00
  -2  11  -6   73.49    5.70
  -3  11   6    8.00    1.80
   3  11  -6    6.10    2.70
   3 -11   6    9.70    1.80
  -3 -11   6    6.20    1.60
  -3  11  -6    6.40    1.80
  -3 -11   6    8.80    1.40
   4  11  -6  124.49    7.10
   4 -11   6  112.99    5.80
  -4  11  -6  109.99    6.60
  -4 -11   6  114.29    6.10
   0   0   7    0.10    1.20
   1   0   7   34.70    3.40
   1   0  -7   24.10    3.00
   1   0   7   28.20    3.90
  -1   0   7   25.40    3.60
  -1   0   7   26.10    3.90
   2   0  -7  220.88   11.20
   2   0   7  218.58   13.40
  -2   0   7  181.68   13.60
   2   0   7  212.48   11.90
  -2   0   7  199.88   12.00
   3   0   7 2144.49   99.09
  -3   0   7 2212.38   93.09
   3   0  -7 2262.87   90.59
   3   0   7 2364.46   94.59
   4   0  -7  561.04   26.30
  -4   0   7  579.64   29.70
   4   0   7  546.95   30.10
   5   0  -7    7.10    2.40
   5   0   7    9.30    4.40
   5   0   7    6.00    2.40
   6   0  -7   81.59    9.30
   6   0   7   78.69    6.90
  -6   0   7   87.99    6.70
   6   0  -7   75.19    9.10
   6   0   7   66.09   11.30
  -6   0   7   87.99   12.10
   7   0   7   75.39   15.00
   7   0   7   89.79    7.80
  -7   0   7   91.39    7.20
   7   0  -7   82.09   10.40
  -7   0   7  101.49    7.00
   7   0  -7   79.09   13.60
  -7   0   7   88.69   14.50
  -8   0   7   20.70    3.30
   8   0   7   22.80    3.80
   9   0  -7   18.80    2.60
  -9   0  -7   15.80    2.80
   9   0   7   21.70    3.90
  -9   0   7   12.50    2.50
 -10   0  -7   79.29    5.70
   0  -1   7  771.62   34.40
   0   1   7  750.92   33.60
   0   1   7  688.53   30.00
   0   1   7  786.92   30.20
   1   1  -7 1907.21   79.09
   1  -1   7 2059.59   81.29
   1  -1   7 1972.30   80.69
  -1   1   7 1901.51   78.99
  -1  -1   7 1874.01   84.39
   1   1   7 1955.80   81.19
   1   1   7 2006.50   76.59
   1  -1  -7 1990.70   78.79
  -2   1   7  703.63   36.60
  -2   1   7  795.92   35.30
   2  -1   7  770.92   36.70
   2  -1   7  844.92   37.40
   2   1  -7  800.12   34.70
   2   1   7  856.31   37.70
  -2  -1   7  795.62   36.40
   2  -1  -7  836.32   34.40
   2   1   7  849.61   33.80
   3  -1   7  159.48   13.40
   3   1  -7  176.38   10.30
  -3   1   7  163.78   14.80
   3  -1   7  176.88   12.50
  -3   1   7  174.68   11.60
   3   1   7  177.88   12.80
   3   1   7  182.78   10.80
  -3  -1   7  169.88   12.20
   3  -1  -7  174.98    9.80
   4  -1   7  333.27   20.60
  -4   1   7  314.87   16.30
   4   1  -7  352.66   17.50
  -4   1   7  344.37   20.10
   4  -1  -7  338.17   16.90
   4   1   7  336.87   20.90
  -4  -1   7  331.47   16.40
  -4  -1   7  350.76   21.20
   4   1   7  360.16   19.80
   4   1   7  334.67   20.80
   5  -1   7  248.48   14.20
   5  -1   7  227.58   17.40
  -5   1   7  248.38   13.50
  -5   1   7  233.48   12.50
  -5   1   7  253.27   17.90
  -5   1   7  249.97   13.20
   5   1  -7  292.67   15.40
  -5  -1   7  265.87   13.40
  -5  -1   7  257.87   13.10
   5   1   7  271.57   17.60
   5   1   7  256.17   18.50
  -5  -1   7  218.98   19.70
   5  -1  -7  258.67   14.60
   5   1   7  227.28   13.80
  -6   1   7  703.53   32.90
   6   1  -7  663.73   31.70
  -6   1   7  613.94   28.90
  -6   1   7  614.64   43.40
  -6  -1   7  627.04   28.40
  -6  -1   7  654.03   28.60
   6  -1  -7  618.14   33.00
   6   1   7  595.14   29.00
  -6  -1   7  654.03   36.90
   6  -1  -7  579.04   30.70
   6   1   7  571.94   42.80
  -7   1   7    9.70    7.90
   7   1  -7   15.00    6.30
   7   1  -7   13.10    6.90
   7  -1   7   10.50   11.00
  -7   1   7    9.90    2.40
   7  -1  -7   13.00    6.10
  -7  -1   7    5.40   11.10
  -7  -1   7   17.60    3.20
   7   1   7   15.80    8.60
   8  -1   7   39.90    4.80
  -8   1   7   36.40    4.30
  -8  -1   7   42.30    4.20
  -9   1   7  114.59    7.50
   9  -1   7  139.79    8.00
   9   1  -7  136.89    7.70
  -9  -1   7  129.99    7.60
  -9   1  -7  139.59    8.60
 -10  -1  -7    5.20    2.50
 -10   1  -7    2.60    2.00
  10  -1  -7    4.70    1.40
   0   2   7  427.66   20.70
   0   2  -7  395.26   19.40
   1   2  -7  926.51   39.70
   1   2  -7  897.41   45.40
  -1   2   7  964.90   37.50
  -1   2   7  919.61   37.80
   1   2   7  958.80   41.90
   1  -2  -7  977.20   39.00
  -1   2  -7  876.41   45.00
  -2   2   7  637.44   30.20
   2   2  -7  648.04   29.20
  -2   2   7  677.13   29.30
   2  -2   7  692.03   31.50
  -2   2  -7  607.44   34.80
   2   2   7  671.53   32.00
   2  -2  -7  661.73   28.20
  -3   2   7  112.49   12.70
  -3   2   7  138.49   10.00
   3  -2   7  147.39   11.10
   3   2  -7  145.89    9.00
   3   2   7  144.49   11.40
   3  -2  -7  135.99    8.10
  -3  -2   7  147.19   11.80
  -4   2   7  251.87   16.10
   4  -2   7  214.28   13.00
   4   2  -7  259.67   13.90
   4  -2   7  240.48   16.20
  -4   2   7  233.08   12.60
  -4   2   7  230.48   12.70
  -4  -2   7  256.67   17.70
   4   2   7  243.58   16.20
  -4  -2   7  213.98   12.00
   4   2   7  240.88   17.10
  -4  -2   7  225.38   12.20
   4  -2  -7  253.57   13.00
  -5   2   7   90.49    7.10
  -5   2   7   98.19    6.50
   5   2  -7   79.09    9.70
   5  -2   7   89.69   10.50
  -5   2   7   86.19    6.60
   5  -2   7   94.19    7.60
  -5   2   7   89.29   10.00
   5   2   7   93.39   14.70
   5  -2  -7   96.09    7.80
   5   2   7   95.39   10.00
  -5  -2   7   89.39    6.50
  -5  -2   7   97.19   18.30
  -5  -2   7   93.59    6.70
   6  -2   7   44.50    5.30
   6  -2   7   26.50    8.50
  -6   2   7   29.00    4.30
  -6   2   7   45.10    4.50
   6   2  -7   38.00    6.30
  -6   2   7   39.90    8.40
   6   2  -7   41.80    6.30
   6   2  -7   44.20    7.90
  -6   2   7   43.20    4.90
   6   2   7   46.70    7.10
   6   2   7   43.30    9.30
  -6  -2   7   52.09    7.10
  -6  -2   7   29.50   13.60
  -6  -2   7   39.50    4.20
  -7   2   7  102.19   14.40
  -7   2   7  136.19    8.90
   7   2  -7  127.99   12.30
   7  -2   7  132.09    9.50
   7  -2  -7   99.39   13.70
  -7  -2   7  127.69    8.30
   7   2   7  115.69   16.00
  -7  -2   7  146.09    8.70
  -7  -2   7  160.88   22.10
  -8   2   7   41.20    4.30
   8   2  -7   37.10    4.00
   8  -2   7   38.20    4.70
  -8   2  -7   43.80    4.80
  -8  -2   7   37.40    3.90
   8  -2  -7   38.50    4.50
  -9   2   7   71.99    5.20
   9   2  -7   79.39    5.80
   9  -2   7   81.69    5.80
  -9  -2   7   72.99    5.10
   0   3  -7 2246.68   97.89
   0   3   7 2489.65   99.49
   0  -3  -7 2478.15   96.99
   0   3  -7 2535.85  106.09
   1   3  -7  544.25   24.80
   1   3  -7  550.94   31.60
  -1   3  -7  539.55   31.10
   1   3   7  524.95   26.60
   1  -3  -7  556.74   23.40
  -2   3   7 1404.56   59.39
  -2   3   7 1432.16   58.39
   2   3  -7 1433.26   59.19
   2   3   7 1494.05   62.59
  -2   3  -7 1326.27   66.69
   2  -3  -7 1444.96   57.39
  -3   3   7  147.49   10.20
  -3   3   7  139.79   11.80
  -3  -3   7  141.29   12.10
   3  -3  -7  144.69    8.10
   3   3   7  117.29   15.90
  -4   3   7   79.79   13.40
   4   3  -7   73.89    7.50
   4  -3   7   68.79    8.50
  -4   3   7   71.89    6.20
   4   3  -7   78.69    6.70
   4  -3   7   75.19    6.50
  -4   3   7   79.39    6.40
   4  -3  -7   78.89    6.40
  -4  -3   7   73.99    5.70
  -4   3  -7   70.99    7.10
   4   3   7   73.99    9.40
  -4  -3   7   69.79   10.00
   4   3   7   85.89    8.70
  -5   3   7  258.87   13.40
  -5   3   7  265.97   18.60
   5   3  -7  253.87   15.80
   5  -3   7  259.17   18.60
   5  -3   7  265.67   15.10
  -5   3   7  269.57   14.30
   5   3  -7  261.97   15.70
  -5  -3   7  251.57   20.90
  -5  -3   7  262.77   13.60
  -5   3  -7  259.57   14.80
   5   3   7  263.67   19.80
   5  -3  -7  253.97   15.20
   5   3   7  268.57   17.70
  -5  -3   7  256.17   13.50
  -6   3   7   74.59    5.70
   6   3  -7   65.49    7.20
   6   3  -7   55.99    9.40
  -6   3   7   68.79    6.00
   6   3  -7   67.89    7.80
   6  -3   7   73.09    6.80
  -6  -3   7   71.09    5.80
   6   3   7   63.69    8.50
  -6  -3   7   64.69    5.60
   6   3   7   52.39   10.70
  -6   3  -7   61.59    6.10
   6  -3  -7   53.29    9.80
  -7   3   7   74.39   12.90
  -7   3   7   87.29    7.00
   7  -3   7   89.69    7.50
   7   3  -7  104.59   15.50
  -7   3  -7   87.29    7.30
  -7  -3   7   83.49    6.30
   7   3   7   75.59    9.00
  -8   3   7   14.20    2.80
   8   3  -7   32.20    8.00
   8  -3   7   19.80    3.40
   8  -3  -7   21.00    3.40
  -8  -3   7   19.40    2.90
  -8   3  -7   21.40    3.40
   9  -3   7   59.29    4.70
  -9   3  -7   58.49    5.00
   9  -3  -7   59.49    4.90
  -9  -3   7   59.69    5.70
   0  -4  -7  916.71   37.50
   0   4   7  947.91   41.00
   0   4  -7  938.21   39.90
   0   4  -7  870.11   47.50
   1   4  -7 1482.35   70.79
   1   4  -7 1521.25   61.79
  -1   4  -7 1507.45   71.19
  -1   4  -7 1522.15   62.19
   1   4   7 1473.55   63.99
   1  -4  -7 1413.76   58.69
  -2   4   7  362.66   18.80
  -2   4   7  425.26   18.70
   2   4  -7  373.26   26.70
   2   4  -7  427.86   20.00
  -2   4  -7  382.06   27.10
   2  -4  -7  396.76   17.10
   2   4   7  436.36   23.10
   3  -4   7 1168.38   51.29
  -3   4   7 1168.38   53.49
   3   4  -7 1230.58   50.49
   3   4  -7 1120.99   52.19
  -3   4   7 1200.28   51.29
  -3   4  -7 1117.19   50.19
  -3  -4   7 1286.67   57.39
   3  -4  -7 1089.29   48.70
   3   4   7 1241.38   53.19
  -3   4  -7 1086.89   60.49
   3   4   7 1237.48   55.29
  -3  -4   7 1139.29   48.70
   4  -4   7  114.59    8.90
   4   4  -7  130.29    9.40
  -4   4   7  122.79    8.00
  -4   4   7  130.89    8.90
  -4   4   7  122.49   11.00
   4   4  -7  129.19   10.50
   4   4   7  130.29   13.40
  -4  -4   7  136.39    8.30
   4   4   7  140.99   11.70
  -4  -4   7  150.08   15.20
  -4   4  -7  114.59    9.00
  -4  -4   7  120.39    7.90
   5   4  -7   10.30    3.90
  -5   4   7   -0.90    7.20
   5  -4   7    8.80    2.80
  -5   4   7    8.30    2.70
  -5   4   7    5.60    2.50
   5   4   7   -0.30    4.60
  -5  -4   7    6.00   10.50
   5   4   7    9.50    4.00
  -5   4  -7    7.70    2.70
  -5  -4   7    6.10    2.00
   6   4  -7   24.60    6.40
  -6   4   7   27.80    3.60
  -6   4   7   16.40    6.70
   6  -4   7   27.20    4.00
  -6   4   7   24.20    4.00
  -6  -4   7   18.00    3.20
  -6  -4   7   26.80    3.70
   6   4   7   17.00    6.50
  -6   4  -7   26.70    4.20
   6   4   7   27.90    5.60
  -7   4   7   56.79    4.80
   7   4  -7   37.60    5.80
  -7   4   7   53.29    5.20
   7  -4   7   55.99    5.80
   7  -4  -7   53.79    5.50
  -7  -4   7   51.69    4.60
  -7  -4   7   48.30    5.10
   7   4   7   46.40    7.40
  -7   4  -7   55.39    5.80
  -8   4   7  144.49    9.20
   8   4  -7  141.89   10.50
   8  -4   7  164.78   10.20
   8  -4  -7  168.18   10.10
  -8  -4   7  160.48    9.00
  -8   4  -7  171.78   10.40
   9  -4   7   75.09    5.40
  -9  -4   7   73.39    5.20
   9  -4  -7   75.69    5.40
  -9   4  -7   71.09    5.40
   0  -5   7  222.28   12.00
   0   5   7  233.28   13.80
   0   5  -7  232.48   12.90
  -1   5   7  390.46   18.00
   1  -5   7  341.77   17.60
   1   5  -7  369.86   20.80
   1   5  -7  385.86   27.50
   1   5  -7  401.36   19.00
  -1  -5   7  353.96   17.60
   1   5   7  375.26   20.90
  -1   5  -7  374.36   18.90
   2   5  -7   19.90    3.50
  -2   5   7   17.00    2.30
  -2   5   7   19.30    3.20
   2   5  -7   22.00    4.40
  -2   5   7   12.90    3.10
  -2   5  -7   30.20    9.20
  -2  -5   7   19.00    3.00
  -2   5  -7   13.80    3.90
   2   5   7   19.30    5.10
  -2  -5   7   16.90    3.20
  -2   5  -7   13.40    3.20
   3  -5   7  105.09    8.10
  -3   5   7  116.79    9.10
  -3   5   7  112.49    8.30
   3  -5   7  107.19    7.20
   3   5  -7   97.89    9.10
   3   5  -7  119.49    8.60
  -3   5   7  108.89    7.30
  -3   5  -7   94.59    8.30
   3   5   7  124.69   10.50
  -3  -5   7  117.59   14.70
  -3  -5   7  104.49    7.30
  -3  -5   7  101.49    7.20
  -3   5  -7  113.39   17.00
   3   5   7   97.49   11.00
  -4   5   7  211.68   12.70
   4   5  -7  206.18   12.90
  -4   5   7  190.88   11.10
   4  -5   7  197.38   11.00
   4  -5   7  196.68   12.40
   4   5  -7  191.58   13.80
  -4   5   7  187.88   14.60
  -4   5  -7  192.88   12.80
  -4  -5   7  196.48   20.10
  -4  -5   7  212.68   11.60
   4   5   7  189.68   16.70
  -4  -5   7  199.98   11.20
   4   5   7  205.68   14.70
  -5   5   7  134.49    8.80
   5   5  -7  137.59   11.20
   5  -5   7  133.09    9.80
   5   5  -7  138.59   11.30
  -5   5   7  150.38    9.80
   5   5   7  120.19   15.00
  -5   5  -7  137.59   10.20
   5   5   7  128.89   11.80
  -5  -5   7  128.39    8.50
  -5  -5   7  148.69    9.00
  -6   5   7    8.40    2.30
   6   5  -7    3.60    5.40
  -6   5   7    6.60    2.30
   6   5  -7    2.40    4.80
  -6   5   7    1.00    6.90
   6  -5   7   11.10    3.00
   6   5   7   13.70    4.30
   6   5   7   13.80    9.30
  -6   5  -7    4.90    1.60
  -6  -5   7    2.90    1.70
  -6  -5   7    7.90    2.30
  -7   5   7  214.08   10.50
  -7   5   7  169.58   11.10
   7   5  -7  164.48   12.10
   7  -5   7  200.38   12.10
  -7   5  -7  184.48   11.90
   7  -5  -7  198.78   11.60
   7   5   7  162.78   13.70
  -7  -5   7  191.58   10.50
   8   5  -7   34.10    4.70
   8  -5   7   35.40    3.90
  -8   5  -7   33.30    4.00
   8  -5  -7   34.00    4.60
  -8  -5   7   33.00    3.20
   9  -5   7   17.80    2.40
  -9   5  -7   18.30    2.50
  -9  -5   7   12.30    2.10
   9  -5  -7   23.70    3.40
   0   6  -7  573.74   29.60
   0  -6   7  582.64   26.10
   0  -6   7  586.54   28.70
   0   6  -7  585.84   26.80
   0   6  -7  532.85   30.20
   0   6  -7  587.94   38.40
   0   6   7  564.74   25.90
   1   6  -7   78.59   14.00
   1  -6   7   80.99    6.00
  -1   6   7   66.89    5.70
  -1   6   7   78.49    7.70
   1   6  -7   69.39    7.50
   1   6  -7   80.89    6.80
   1   6   7   65.09    8.70
  -1   6  -7   71.79   14.60
   1   6   7   68.09    5.90
  -1  -6   7   68.99    5.70
   1   6   7   88.89    6.90
  -1   6  -7   75.89    7.30
  -1   6  -7   78.89    6.80
   2   6  -7   12.90    3.30
   2  -6   7   12.20    2.70
   2  -6   7   17.90    3.40
   2   6  -7   12.30    3.70
   2   6  -7   13.50    3.90
  -2   6   7   14.30    2.80
   2   6   7    9.10    4.70
   2   6   7   19.00    3.80
  -2   6  -7   11.30    8.60
  -2   6  -7    7.10    3.10
  -2  -6   7   12.80    2.70
   2   6   7    6.60    5.60
  -2   6  -7   19.90    3.90
  -2  -6   7   14.40    2.60
   3   6  -7  796.42   34.90
   3  -6   7  747.33   33.30
   3   6  -7  730.13   33.80
  -3   6   7  767.12   33.60
   3  -6   7  718.23   34.20
   3   6   7  752.52   36.90
  -3   6  -7  679.23   34.50
  -3  -6   7  759.02   34.10
  -3  -6   7  874.51   48.80
  -3   6  -7  742.53   35.80
  -3   6  -7  777.02   58.39
   3   6   7  753.12   40.20
  -4   6   7  611.64   34.90
  -4   6   7  600.74   28.20
   4   6  -7  593.44   30.10
  -4   6   7  656.83   30.00
   4   6  -7  647.74   34.80
   4  -6   7  625.54   27.80
   4   6  -7  621.54   31.70
   4  -6   7  613.64   29.60
  -4   6  -7  625.44   30.60
  -4  -6   7  601.74   27.80
  -4  -6   7  636.04   28.30
   4   6   7  620.34   32.30
   4   6   7  595.94   36.10
  -5   6   7   23.00    3.50
   5   6  -7   10.70    5.60
  -5   6   7   18.90    6.40
   5  -6   7   15.10    3.60
   5   6  -7   22.60    4.70
   5   6  -7   15.60    7.20
   5   6   7   17.30    9.80
  -5   6  -7   14.50    3.40
  -5  -6   7   19.70    3.20
  -5  -6   7   19.20    3.20
   5   6   7   27.20    5.50
   5  -6  -7   20.50    3.40
   6   6  -7    0.50    1.90
   6  -6   7    1.30    1.70
  -6   6   7    0.20   12.10
  -6   6   7    0.90    1.50
  -6  -6   7    0.00    1.30
   6   6   7    2.40    2.80
  -6  -6   7   -0.70    1.60
   6  -6  -7    1.20    1.50
  -6   6  -7    4.70    2.70
   7  -6   7   28.40    3.80
  -7   6   7   24.00    3.50
  -7  -6   7   26.40    3.20
  -7   6  -7   29.20    4.10
   7  -6  -7   23.40    3.50
   8   6  -7   27.80    4.00
   8  -6   7   37.40    3.80
   8  -6  -7   41.00    3.80
  -8  -6   7   42.10    3.80
  -8   6  -7   39.00    4.00
   0   7  -7  250.37   14.90
   0   7   7  247.18   14.10
   0   7   7  244.48   13.30
   0   7  -7  231.98   23.60
   0  -7   7  226.78   15.80
   1   7  -7   76.29   13.60
  -1   7   7   97.89    7.90
   1   7  -7   98.59    8.20
   1   7  -7   94.89    9.40
   1  -7   7   73.39    7.00
   1  -7   7  104.59    7.30
  -1   7   7   97.79    7.90
  -1   7  -7  101.79   16.60
   1   7   7  108.19    8.80
   1   7   7   91.89    7.00
  -1  -7   7   91.79    6.80
  -1   7  -7   90.59   11.30
   2   7  -7  202.88   14.60
   2   7  -7  196.38   12.80
  -2   7   7  203.88   11.90
  -2   7   7  220.58   17.90
   2  -7   7  207.28   11.70
  -2   7  -7  189.28   23.20
  -2  -7   7  202.18   11.60
  -2   7  -7  189.58   13.20
   2   7   7  200.18   17.20
  -2  -7   7  192.38   11.40
   3  -7   7  236.48   12.90
  -3   7   7  213.78   12.80
  -3   7   7  217.08   13.60
   3   7  -7  256.37   18.30
   3   7  -7  229.08   13.20
   3  -7   7  217.88   13.30
   3   7  -7  233.18   14.80
   3   7  -7  223.68   15.80
   3   7   7  230.88   20.20
  -3   7  -7  226.68   14.90
  -3  -7   7  233.08   12.90
   3   7   7  229.08   15.50
  -3  -7   7  232.58   12.80
  -3   7  -7  236.18   41.90
   4   7  -7  413.76   27.50
   4   7  -7  479.15   25.30
   4   7  -7  465.85   25.50
   4  -7   7  473.15   21.50
   4  -7   7  463.55   22.80
  -4   7   7  464.35   22.00
  -4  -7   7  470.65   21.80
   4  -7  -7  432.46   21.40
   4   7   7  389.96   30.10
  -4   7  -7  460.75   24.20
  -4  -7   7  451.95   21.40
   4   7   7  441.56   25.30
   5   7  -7   54.69    6.60
   5  -7   7   57.49    5.60
  -5   7   7   54.99    5.10
   5  -7   7   55.69    4.70
   5  -7  -7   54.59    5.50
  -5  -7   7   59.59    5.10
  -5  -7   7   57.09    5.10
   5   7   7   55.59    7.40
  -5   7  -7   50.89    6.40
   6  -7   7  105.69    7.80
  -6   7   7  105.99    6.90
   6   7  -7   95.09    8.40
  -6  -7   7  107.29    7.00
  -6   7  -7  105.19    8.40
  -6  -7   7  111.19    6.80
   6  -7  -7   94.89    7.10
   6   7   7   96.09    9.30
   7   7  -7   77.79    7.00
   7  -7   7   85.79    6.10
  -7   7   7   65.49    5.80
   7  -7  -7   76.09    5.60
  -7   7  -7   90.59    7.00
  -7  -7   7   83.09    5.40
   8  -7   7    0.10    0.90
   8   7  -7   -1.60    1.70
  -8   7  -7    0.10    1.50
   8  -7  -7   -0.10    1.80
  -8  -7   7    1.40    0.90
   0   8  -7  338.17   19.00
   0  -8   7  328.57   17.30
   0   8  -7  331.37   20.60
   0   8   7  343.67   17.40
   0   8   7  345.77   18.20
   1   8  -7  103.49   10.00
  -1   8   7  108.99    8.40
   1   8  -7  110.19    8.70
   1  -8   7  111.59    8.00
  -1   8   7  114.89    8.10
   1   8  -7  118.69   18.20
  -1   8  -7  128.19   19.30
  -1  -8   7  108.89    7.80
   1   8   7  106.39    8.50
  -1   8  -7  110.99   10.20
   1   8   7  106.19    7.60
  -1   8  -7  113.69    9.40
  -2   8   7   38.30    5.80
  -2   8   7   34.90    4.30
   2   8  -7   33.00    4.60
   2  -8   7   34.30    4.10
   2   8  -7   26.90    5.60
   2  -8   7   39.50    5.10
  -2   8  -7   11.40   13.90
  -2   8  -7   33.20    5.20
  -2  -8   7   35.40    4.10
  -2  -8   7   34.10    4.00
  -2   8  -7   34.30    5.30
  -3   8   7   19.20    5.00
   3   8  -7   21.00    5.10
  -3   8   7   25.20    3.80
   3  -8   7   32.40    3.90
  -3  -8   7   30.00    3.70
  -3   8  -7   25.30    4.90
  -3  -8   7   22.50    3.40
   4  -8   7    9.40    2.70
  -4   8   7    5.50    2.00
   4  -8   7    6.60    1.80
   4   8  -7    6.60    2.60
  -4  -8   7    8.80    2.10
  -4  -8   7    6.80    1.90
  -4   8  -7   11.30    3.30
   4   8   7   10.40    4.20
   5   8  -7   24.80    4.50
  -5   8   7   23.10    3.30
   5  -8   7   22.80    2.90
   5  -8   7   17.60    3.20
  -5  -8   7   22.00    2.90
  -5  -8   7   18.70    2.70
  -5   8  -7   24.00    4.20
   5   8   7   16.30    4.20
   6   8  -7   16.90    4.90
  -6   8   7   28.80    3.00
   6  -8   7   22.90    3.20
  -6   8  -7   27.80    4.80
   7   8  -7  103.39    7.40
   7  -8   7  114.49    6.30
  -7   8   7  122.99    5.70
  -7   8  -7  106.09    7.20
  -7  -8   7  112.39    6.10
   0   9  -7    8.00    3.30
   0   9  -7    8.10    2.90
   0   9   7    7.00    2.60
   0  -9   7    3.90    1.60
   0   9   7    6.60    2.40
  -1   9   7  251.87   14.30
   1  -9   7  249.48   13.50
  -1   9   7  256.07   13.70
   1   9  -7  233.08   14.20
   1   9  -7  247.88   16.20
   1   9   7  233.08   12.60
  -1  -9   7  230.58   13.10
  -1   9  -7  251.27   16.00
  -1  -9   7  245.58   13.40
   1   9   7  253.57   14.20
  -1   9  -7  249.18   15.20
  -2   9   7   21.30    3.70
  -2   9   7   37.20    4.60
   2   9  -7   26.10    4.10
   2  -9   7   29.80    3.90
   2   9  -7   31.60    5.10
  -2  -9   7   30.50    3.70
  -2  -9   7   32.00    3.70
  -2   9  -7   26.10    4.50
  -2   9  -7   27.00    5.00
   3   9  -7   66.49    7.00
  -3   9   7   57.39    6.10
   3  -9   7   67.99    5.50
  -3   9   7   68.79    5.70
  -3  -9   7   66.19    5.30
  -3  -9   7   64.59    5.40
  -3   9  -7   70.29    6.90
  -4   9   7    0.60    1.20
   4   9  -7   -0.70    1.40
   4  -9   7    1.20    1.10
  -4  -9   7    0.40    1.00
  -4   9  -7    4.70    2.00
  -4  -9   7    1.60    1.10
   5  -9   7    9.90    1.90
   5   9  -7   14.40    3.50
  -5   9   7   10.70    2.10
   5  -9   7    9.40    2.60
  -5  -9   7    9.00    2.60
  -5  -9   7    8.00    2.00
  -5   9  -7    9.30    2.60
   6   9  -7  119.89    9.10
  -6   9   7  107.19    6.40
  -6  -9   7  131.99    6.90
  -6   9  -7  140.59    8.20
   0  10  -7   81.39    6.80
   0 -10   7   83.59    6.00
   0  10   7   80.39    5.70
   0  10  -7   92.79    7.70
   0 -10   7   79.29    6.10
   1  10  -7   77.59    6.20
   1 -10   7   87.49    6.40
  -1  10   7   81.79    6.00
  -1  10   7   97.79    9.50
   1  10  -7   80.79    7.40
   1 -10   7   78.99    5.70
  -1  10  -7   91.79    8.30
  -1  10  -7   79.79    6.90
  -1 -10   7   72.99    5.90
  -1 -10   7   83.49    5.90
   2  10  -7   53.59    5.80
   2 -10   7   49.70    4.00
   2 -10   7   58.19    4.80
  -2  10   7   56.19    4.90
  -2  10   7   55.89    4.80
   2  10  -7   55.39    4.90
  -2 -10   7   58.29    4.70
  -2  10  -7   51.19    5.20
  -2  10  -7   42.70    8.30
   3 -10   7   74.59    5.50
  -3  10   7   61.09    5.90
   3  10  -7   81.19    8.00
  -3 -10   7   60.49    4.70
  -3  10  -7   77.89    7.10
  -3 -10   7   70.99    5.80
   4  10  -7    6.20    1.80
   4 -10   7    8.00    2.10
  -4  10   7    7.40    1.60
  -4  10  -7    5.10    1.70
  -4 -10   7   10.00    1.80
  -4 -10   7   12.10    2.10
   5  10  -7  162.48    9.20
  -5  10   7  136.99    7.40
  -5  10  -7  150.48    8.80
  -5 -10   7  150.88    7.60
   0  11  -7  119.19    7.60
   0  11  -7  140.69    7.80
   0 -11   7  152.68    9.20
   0 -11   7  125.39    7.70
   1  11  -7    7.50    2.30
   1  11  -7   11.50    2.70
  -1  11   7    5.20    1.30
   1 -11   7    7.10    1.80
  -1 -11   7    7.70    1.80
  -1 -11   7    8.90    1.80
   1 -11  -7    4.80    1.30
  -1  11  -7    8.80    2.30
   2  11  -7  169.58   10.80
   2 -11   7  153.68    8.10
  -2  11   7  132.19    7.60
  -2  11  -7  139.89    8.40
  -2 -11   7  146.29    7.80
  -2 -11   7  152.68    8.30
   3 -11   7   28.20    3.20
   3  11  -7   28.70    3.20
  -3 -11   7   23.80    2.40
  -3  11  -7   31.70    3.40
  -3 -11   7   27.00    2.50
   0   0   8  334.17   16.40
  -1   0   8   12.20    2.50
   1   0   8   12.90    2.90
   1   0   8    7.90    2.80
   1   0  -8   14.30    2.40
  -2   0   8  486.65   24.60
  -2   0   8  507.35   27.00
   2   0   8  520.85   26.50
   2   0   8  532.15   24.30
   2   0  -8  526.95   23.80
  -3   0   8  104.99    9.00
   3   0   8  107.29    9.80
   3   0   8  102.49    8.80
   3   0  -8  101.89    7.40
  -4   0   8   28.10    3.60
  -4   0   8   24.70    3.60
   4   0   8   28.90    6.50
   4   0   8   20.60    4.10
   4   0  -8   24.30    3.80
  -4   0   8   23.30    5.20
   5   0   8  347.07   18.70
   5   0  -8  343.87   20.00
  -5   0   8  375.16   17.80
   5   0   8  358.16   23.70
  -5   0   8  378.76   23.40
  -5   0   8  363.76   17.90
   6   0  -8   15.60    5.70
  -6   0   8    7.60    2.20
  -6   0   8    3.20    5.90
   6   0   8    9.50    6.10
  -6   0   8   10.50    2.70
   6   0   8    8.60    2.50
   6   0  -8    4.80    3.00
   7   0  -8   53.29    9.90
   7   0   8   76.99    6.90
  -7   0   8   82.39    6.50
  -7   0   8   59.99   13.90
  -7   0   8   79.39    6.20
   8   0   8   19.80    3.20
  -8   0   8   14.00    3.30
  -9   0   8  108.49    7.00
   9   0   8  116.59    7.00
   9   0  -8  129.59    7.50
  -9   0  -8  142.39    8.40
   0   1   8 2014.90   80.39
   0   1  -8 1825.62   78.49
   0   1   8 1951.70   75.59
   0   1   8 1848.92   75.59
   0  -1   8 1997.30   80.59
  -1   1   8  462.85   21.50
   1  -1   8  515.25   24.90
  -1   1   8  497.05   22.20
   1   1  -8  478.05   22.70
   1  -1   8  474.65   23.80
   1  -1  -8  504.15   22.50
   1   1   8  489.95   24.70
  -1  -1   8  470.25   25.40
  -2   1   8  251.57   14.10
   2  -1   8  260.57   15.60
  -2   1   8  250.27   15.20
   2   1  -8  260.97   13.80
   2  -1   8  263.07   16.10
  -2  -1   8  230.78   27.00
   2  -1  -8  288.27   13.80
  -2  -1   8  251.47   15.10
   2   1   8  271.27   16.50
   3  -1   8  224.78   15.40
  -3   1   8  265.17   25.80
   3  -1   8  220.58   16.20
   3   1  -8  221.18   12.70
  -3   1   8  216.38   14.00
  -3  -1   8  225.38   14.90
   3   1   8  230.18   15.70
   3  -1  -8  226.48   12.40
   4   1  -8  488.45   22.80
  -4   1   8  437.06   24.00
   4  -1   8  414.16   21.80
   4  -1   8  468.65   26.50
  -4   1   8  434.56   25.60
   4  -1  -8  473.75   22.20
  -4  -1   8  440.36   21.20
   4   1   8  462.95   26.70
  -4  -1   8  492.75   26.80
   5  -1   8  222.48   13.30
  -5   1   8  233.58   17.30
   5  -1   8  195.38   17.10
  -5   1   8  212.58   12.30
  -5   1   8  224.88   11.70
   5   1  -8  249.48   14.40
  -5   1   8  233.08   12.40
   5   1   8  210.18   13.10
  -5  -1   8  215.38   12.00
   5  -1  -8  225.98   13.70
   5   1   8  212.78   18.30
  -5  -1   8  234.98   17.90
  -5  -1   8  228.28   12.30
  -6   1   8  137.29    9.10
  -6   1   8  138.89    8.90
  -6   1   8  137.99    8.50
   6  -1   8  134.99    9.90
   6  -1   8  142.39   15.10
   6   1  -8  143.89   11.60
  -6   1   8  136.19   14.40
  -6  -1   8  135.79    9.00
  -6  -1   8  141.09    8.90
   6   1   8  141.59    9.90
   6  -1  -8  113.69   14.20
   6  -1  -8  142.59   11.50
   6   1   8  128.79   14.80
  -6  -1   8  141.89   15.60
   7  -1   8    4.60   14.20
  -7   1   8   25.10    8.80
   7   1  -8   19.20    8.40
   7   1  -8   10.70    5.60
   7   1   8   21.20    9.30
  -7  -1   8   15.30   10.60
   7  -1  -8   15.20    6.50
  -8   1   8   33.90    4.00
   8  -1   8   24.90    3.80
  -8  -1   8   30.20    3.60
  -9   1   8   13.20    2.40
   9  -1   8   16.00    3.30
   9   1  -8   12.30    2.70
  -9   1  -8   16.50    2.80
   9  -1  -8   19.20    2.60
  -9  -1   8   12.50    2.30
   0   2   8 1854.01   74.79
   0  -2  -8 1736.43   72.49
   0  -2   8 1801.82   89.29
   0   2  -8 1811.42   81.39
   0   2  -8 1709.63   73.19
   1  -2   8  762.72   40.50
   1   2  -8  752.22   33.80
   1  -2  -8  780.92   33.00
   1   2   8  763.12   35.90
   2  -2   8  252.77   15.30
  -2   2   8  220.98   12.20
   2   2  -8  238.78   13.00
  -2   2   8  211.38   12.90
   2  -2  -8  235.38   12.10
   2   2   8  221.38   15.00
  -2  -2   8  235.08   14.90
   3  -2   8   86.59    8.70
  -3   2   8   98.89    8.10
  -3   2   8   67.39    9.40
   3   2  -8   78.39    6.60
   3  -2  -8   81.99    6.00
   3   2   8   72.19    8.60
  -3  -2   8   73.79    8.50
  -4   2   8 1006.50   44.30
   4  -2   8  956.10   44.80
  -4   2   8 1020.50   44.20
   4   2  -8 1114.49   46.00
   4  -2   8 1037.60   49.30
  -4   2   8 1018.40   44.20
   4   2   8 1116.09   51.29
  -4  -2   8 1020.00   43.70
   4  -2  -8 1026.10   44.70
   4   2   8 1047.20   48.90
  -4  -2   8 1114.89   51.39
  -4  -2   8 1027.80   43.80
  -5   2   8  146.89    9.30
   5   2  -8  119.99   10.30
   5  -2   8  151.78   14.10
  -5   2   8  137.19    8.40
  -5   2   8  144.99   12.90
   5  -2   8  149.29   10.00
  -5   2   8  140.39    9.10
   5   2  -8  146.99   10.70
  -5  -2   8  149.39   15.10
   5   2   8  140.29   13.90
  -5  -2   8  145.29    8.80
   5   2   8  147.09   12.60
   5  -2  -8  149.19   10.40
  -5  -2   8  134.69    8.70
   5   2   8  117.49   13.00
  -6   2   8  727.23   32.20
  -6   2   8  667.43   41.90
   6  -2   8  590.04   37.40
   6   2  -8  722.93   37.90
  -6   2   8  747.63   32.00
   6  -2   8  700.23   32.80
  -6   2   8  723.33   30.70
   6   2  -8  783.32   35.40
   6   2  -8  625.84   32.70
   6  -2  -8  675.33   34.30
   6   2   8  690.23   40.00
  -6  -2   8  742.53   31.30
  -6  -2   8  697.63   31.30
  -6  -2   8  703.63   41.10
  -7   2   8    0.40    1.80
  -7   2   8   -0.40    8.10
   7  -2   8    1.20    1.50
  -7  -2   8   24.10   17.20
  -7  -2   8    4.20    2.50
  -7  -2   8    3.50    1.80
   8  -2   8  155.98   10.00
   8   2  -8  157.08    9.20
  -8   2   8  143.59    9.30
  -8   2  -8  160.78   10.10
   8  -2  -8  165.58   10.20
  -8  -2   8  165.38    9.30
  -9   2   8   72.19    5.30
   9  -2   8   86.99    5.70
  -9  -2   8   77.99    5.30
   9  -2  -8   89.69    6.10
  -9   2  -8   92.09    6.20
   0  -3  -8 2518.85   98.99
   0   3   8 2470.05  101.49
   0   3  -8 2437.46  100.19
   0   3  -8 2457.85  108.99
   1   3  -8 1024.20   54.49
   1   3  -8 1106.59   46.90
   1   3   8 1152.78   49.50
   1  -3  -8 1126.59   45.30
  -1   3  -8 1053.59   55.19
  -2   3   8   75.09    5.80
   2   3  -8   79.19    6.60
  -2   3   8   87.49    5.50
   2  -3  -8   92.69    5.90
   2   3   8   75.69    8.20
  -3   3   8  332.47   17.70
  -3   3   8  306.27   15.60
  -3   3   8  309.37   16.30
   3   3  -8  346.17   17.50
   3   3  -8  303.17   19.30
   3  -3   8  310.87   16.80
  -3   3   8  315.57   16.50
  -3  -3   8  352.06   21.60
  -3  -3   8  322.47   15.90
   3  -3  -8  365.26   16.20
   3   3   8  341.67   21.10
  -3  -3   8  304.27   15.70
   3   3   8  341.87   19.80
   4   3  -8  316.37   19.20
  -4   3   8  351.56   17.80
  -4   3   8  330.77   16.50
  -4   3   8  329.87   20.00
  -4   3   8  358.86   17.60
   4   3  -8  379.06   18.90
   4  -3   8  335.97   18.00
  -4  -3   8  350.66   23.50
  -4  -3   8  327.27   16.40
   4   3   8  357.16   21.10
   4   3   8  344.37   22.80
  -4  -3   8  341.47   16.80
  -4  -3   8  327.87   16.60
  -4   3  -8  314.97   17.60
   4  -3  -8  375.36   18.00
   5   3  -8  322.27   19.10
  -5   3   8  356.66   16.80
   5   3  -8  298.87   24.50
   5  -3  -8  335.67   18.90
  -5   3  -8  339.47   18.50
  -5  -3   8  351.46   16.90
  -5  -3   8  365.46   25.10
   6   3  -8   79.79    9.50
   6   3  -8   92.59   11.30
  -6   3   8   87.89   11.50
   6   3  -8   82.89    8.30
   6  -3   8   98.09    8.10
  -6   3   8  101.59    7.50
  -6   3   8  103.19    6.90
  -6  -3   8  105.69    7.20
  -6  -3   8   94.59    7.10
  -6   3  -8   95.39    7.80
   6   3   8  109.99   10.60
   6   3   8   69.09   12.50
  -7   3   8    4.30   10.40
   7   3  -8    2.60    3.00
  -7   3   8    9.10    2.60
   7  -3   8    7.80    2.40
  -7   3   8   10.40    3.00
  -7  -3   8   10.70    2.70
  -7  -3   8   11.20    2.60
  -7   3  -8    6.90    2.90
  -8   3   8  136.49    8.90
   8  -3   8  153.28    9.70
  -8  -3   8  145.39    8.60
  -8   3  -8  142.19    9.50
   8  -3  -8  171.58   10.10
   9  -3   8   78.99    5.50
  -9   3  -8   73.49    5.60
   9  -3  -8   77.99    5.60
  -9  -3   8   73.79    5.00
   0   4  -8   70.09   11.30
   0   4  -8   76.29    6.50
   0  -4  -8   77.09    5.40
   0   4   8   74.99    7.50
   1   4  -8  967.50   52.59
   1   4  -8  968.50   42.90
  -1  -4   8 1071.19   46.70
   1  -4  -8  941.01   40.10
  -1   4  -8  988.10   52.99
   1   4   8 1012.10   45.60
  -1   4  -8  982.40   43.50
   2  -4   8  297.27   15.80
   2   4  -8  288.17   17.70
  -2   4   8  295.97   15.70
   2   4  -8  303.97   16.30
  -2   4   8  282.57   14.80
  -2  -4   8  316.17   15.20
   2   4   8  347.27   19.90
   2  -4  -8  308.07   13.80
  -2  -4   8  294.97   14.90
   3   4  -8  514.55   27.60
  -3   4   8  545.35   25.50
   3  -4   8  528.35   28.40
   3   4  -8  583.04   26.50
  -3   4   8  518.85   24.30
  -3   4   8  513.45   26.80
  -3   4   8  583.74   26.10
   3  -4   8  517.85   25.60
   3   4   8  568.04   30.80
   3   4   8  610.14   33.50
  -3  -4   8  594.74   32.70
  -3   4  -8  464.35   25.60
  -3  -4   8  526.75   24.40
  -3  -4   8  529.35   24.40
  -4   4   8  283.97   17.50
   4   4  -8  267.07   17.00
   4  -4   8  266.57   15.30
  -4   4   8  272.87   14.00
  -4   4   8  288.07   15.20
   4   4  -8  249.88   15.50
  -4   4  -8  240.88   15.10
  -4  -4   8  268.27   14.00
  -4  -4   8  268.47   14.10
   4   4   8  269.07   18.10
  -4  -4   8  308.07   15.30
   4   4   8  257.07   20.00
  -4  -4   8  301.67   22.10
  -5   4   8   57.59    5.60
  -5   4   8   44.50    4.40
  -5   4   8   44.40    8.00
   5   4  -8   51.89    6.40
   5   4  -8   48.20    6.40
   5  -4   8   38.70    5.20
   5   4   8   44.20    7.40
   5   4   8   46.30    9.90
  -5  -4   8   46.50    4.70
  -5  -4   8   48.30    4.60
  -5   4  -8   47.60    5.50
   6   4  -8   12.20    6.40
  -6   4   8   10.90    3.00
   6  -4   8    9.10    2.70
   6   4  -8    8.10    3.10
  -6   4   8    8.80    6.50
  -6   4   8   12.80    2.60
  -6  -4   8    9.00    2.40
  -6   4  -8   13.00    3.10
  -6  -4   8   25.10   17.00
  -6  -4   8    8.80    2.10
   6   4   8    8.10    7.40
   6   4   8    8.40    4.40
   7  -4   8   16.90    3.70
  -7   4   8   18.10    2.90
  -7   4   8   17.40    3.20
  -7  -4   8   18.00    3.00
  -7   4  -8   10.50    2.60
  -7  -4   8   15.80    3.10
   8  -4   8   51.09    4.90
  -8   4   8   43.20    4.30
   8   4  -8   49.70    6.30
   8  -4  -8   50.69    4.80
  -8   4  -8   50.39    4.90
  -8  -4   8   46.70    4.10
   9  -4   8    7.20    1.50
  -9   4  -8    8.00    2.00
   9  -4  -8    9.00    1.80
  -9  -4   8    4.80    1.30
   0  -5   8   40.40    4.00
   0   5  -8   46.90   12.40
   0  -5   8   43.00    4.60
   0   5   8   41.70    6.10
   0   5  -8   41.70    5.00
   0   5   8   38.20    4.10
   1   5  -8   66.09    6.20
   1  -5   8   63.89    5.20
  -1   5   8   59.69    5.10
   1   5  -8   62.69    7.10
   1  -5   8   48.30    5.30
   1   5  -8   56.29   12.00
  -1  -5   8   58.99    5.20
  -1   5  -8   46.10    6.90
  -1  -5   8   69.69    7.10
   1   5   8   78.59    9.00
   1   5   8   67.59    5.50
  -1   5  -8   63.39    6.30
   2   5  -8   28.00    5.10
  -2   5   8   23.50    4.10
   2   5  -8   24.60    4.20
   2  -5   8   30.00    4.00
  -2   5   8   22.20    3.20
   2  -5   8   24.50    3.40
  -2  -5   8   25.30    3.40
  -2   5  -8   21.40    4.10
   2   5   8   25.70    6.00
  -2   5  -8   24.20    4.50
  -2  -5   8   23.00    3.40
   2   5   8   24.50    6.20
   3   5  -8  300.97   17.10
   3  -5   8  295.17   16.50
  -3   5   8  308.57   16.70
   3  -5   8  301.87   15.20
   3   5  -8  293.67   18.30
  -3   5   8  292.07   15.40
  -3   5   8  314.97   15.00
  -3   5  -8  305.67   17.10
   3   5   8  308.87   21.40
  -3  -5   8  304.17   15.40
  -3  -5   8  314.87   34.60
   3   5   8  320.97   19.20
  -3  -5   8  308.17   15.50
  -4   5   8  558.44   26.30
  -4   5   8  562.54   29.00
   4   5  -8  581.94   30.10
   4   5  -8  626.94   28.90
   4  -5   8  541.55   25.60
   4  -5   8  563.14   27.90
  -4   5   8  588.84   27.80
  -4   5  -8  540.15   28.10
  -4  -5   8  580.44   26.40
  -4  -5   8  604.74   37.40
   4   5   8  634.24   33.00
  -4  -5   8  591.84   26.60
   4   5   8  559.74   34.00
  -5   5   8   12.50    5.90
   5   5  -8    7.30    3.00
   5  -5   8   12.80    3.30
   5   5  -8    7.00    3.90
   5   5  -8    6.70    4.70
  -5   5   8    8.30    2.50
  -5   5   8    7.60    2.20
   5   5   8   11.10    4.20
   5   5   8   19.10    8.00
  -5  -5   8    7.00    2.00
  -5  -5   8    6.90    2.20
  -5   5  -8    3.20    2.00
  -5  -5   8   50.29   20.60
   6   5  -8   44.80    8.60
  -6   5   8   48.70    4.90
  -6   5   8   31.10    6.90
  -6  -5   8   51.39    4.80
  -6  -5   8   37.80    6.40
   7   5  -8    0.00    2.00
  -7   5   8   -2.10    1.70
  -7   5   8    2.30    1.90
   7  -5   8    4.80    1.90
  -7   5  -8    1.40    1.60
  -7  -5   8    0.40    1.20
   7  -5  -8    2.80    1.50
  -7  -5   8   -0.10    2.30
   8   5  -8   18.30    4.40
  -8  -5   8   21.60    2.60
   8  -5  -8   21.30    3.10
   0  -6   8  491.55   23.20
   0   6   8  498.85   23.80
   0  -6   8  497.45   23.30
   0   6  -8  526.25   24.70
   0   6   8  522.35   23.40
   0   6  -8  460.65   24.70
   0   6  -8  516.55   36.50
   0   6  -8  504.25   27.00
  -1   6   8   31.80    5.70
   1   6  -8   21.20    4.50
   1   6  -8   28.20    4.70
   1  -6   8   20.80    3.70
   1  -6   8   24.40    3.20
  -1   6   8   20.60    3.30
   1   6  -8   17.50    9.50
  -1  -6   8   22.80    3.30
  -1   6  -8    6.60    9.50
  -1   6  -8   19.10    3.90
   1   6   8   15.70    5.20
   1   6   8   26.60    3.80
   1   6   8   29.20    4.60
  -1  -6   8   13.90    2.80
   2  -6   8  279.27   15.40
   2   6  -8  288.97   16.10
   2   6  -8  285.77   18.40
  -2   6   8  288.17   15.10
   2  -6   8  280.97   14.80
  -2   6  -8  283.37   16.50
  -2  -6   8  293.07   14.90
   2   6   8  290.17   20.50
   2   6   8  282.67   18.40
  -2   6  -8  273.57   16.50
  -2  -6   8  298.97   15.10
   3  -6   8  970.30   42.00
   3   6  -8 1030.60   44.30
   3  -6   8  963.60   43.30
  -3   6   8  971.80   42.30
   3   6  -8  969.00   46.30
  -3   6  -8  994.60   44.70
  -3  -6   8 1003.40   54.39
  -3  -6   8  988.70   42.20
  -3  -6   8  948.31   42.00
   3   6   8 1033.40   50.19
  -3   6  -8  934.81   44.20
   4   6  -8   35.80    6.40
  -4   6   8   23.20    3.70
   4  -6   8   27.10    3.50
   4   6  -8   28.90    5.50
   4  -6   8   37.90    4.80
   4   6   8   22.60    5.40
  -4  -6   8   30.70    4.00
  -4  -6   8   31.50    3.80
   4   6   8   40.20    9.80
  -4   6  -8   28.90    5.20
   5   6  -8  314.17   18.20
   5  -6   8  290.77   16.40
  -5   6   8  255.27   16.20
  -5   6   8  283.87   14.90
  -5  -6   8  298.87   15.10
  -5   6  -8  301.67   17.20
  -5  -6   8  275.97   14.50
   5   6   8  259.67   18.40
  -6   6   8   91.79    6.50
   6   6  -8   83.89    8.20
   6  -6   8   97.19    7.80
  -6  -6   8  103.69    6.60
   6   6   8   81.99    8.90
  -6   6  -8   95.39    8.00
   6  -6  -8   89.09    7.10
  -6  -6   8   91.29    6.50
   7  -6   8    9.10    2.10
  -7   6   8    9.20    1.80
   7   6  -8    6.00    3.70
   7  -6  -8    8.90    2.50
  -7   6  -8    9.90    2.60
   8  -6   8   17.40    2.70
  -8   6  -8   15.90    2.90
   8  -6  -8   14.70    2.30
  -8  -6   8   12.70    2.10
   0   7  -8  390.86   23.00
   0   7   8  395.76   19.40
   0  -7   8  395.86   19.30
   0   7  -8  369.26   33.40
   0   7  -8  392.66   21.90
   1   7  -8  220.78   14.20
  -1   7   8  232.98   12.90
   1   7  -8  233.18   16.00
   1  -7   8  222.48   12.60
   1   7  -8  218.78   25.40
   1   7  -8  203.98   14.70
  -1   7  -8  223.58   14.20
  -1  -7   8  220.78   12.60
  -1  -7   8  222.48   12.40
   1   7   8  216.48   13.00
  -1   7  -8  221.88   26.20
   1   7   8  235.28   12.50
  -1   7  -8  229.08   15.80
   2  -7   8  226.28   12.30
   2  -7   8  216.28   12.50
   2   7  -8  211.48   12.70
  -2   7   8  223.98   12.60
   2   7  -8  209.48   13.70
   2   7  -8  205.58   14.90
  -2  -7   8  211.28   12.00
  -2  -7   8  222.18   12.30
   2   7   8  178.28   18.40
  -2   7  -8  207.78   13.80
   3   7  -8  265.07   17.00
   3   7  -8  285.37   18.10
   3  -7   8  258.17   15.20
   3   7  -8  287.77   20.80
  -3   7   8  280.27   15.00
   3  -7   8  287.67   14.70
  -3   7  -8  260.87   16.50
  -3  -7   8  284.37   14.80
   3   7   8  274.57   17.80
   3   7   8  245.58   22.80
  -3  -7   8  290.47   14.70
   4  -7   8   22.90    3.60
   4  -7   8   22.10    4.00
  -4   7   8   15.50    3.10
   4   7  -8   19.20    4.80
  -4  -7   8   12.30    2.50
  -4  -7   8   17.30    3.00
   4   7   8   18.90    6.10
   4  -7  -8   17.20    3.70
  -4   7  -8   21.20    4.80
   5  -7   8  116.19    8.40
   5   7  -8  114.09    9.50
  -5   7   8  102.69    7.30
   5  -7   8   99.09    6.50
  -5  -7   8  111.09    7.20
   5   7   8   95.49   10.00
  -5  -7   8  110.19    7.40
  -5   7  -8  100.89    8.60
   5  -7  -8  104.69    7.50
   6   7  -8    3.00    1.70
  -6   7   8    6.00    1.80
   6  -7   8    8.20    2.40
  -6   7  -8    6.20    2.10
  -6  -7   8    8.10    2.00
   6  -7  -8    5.30    2.40
  -6  -7   8    7.30    1.80
   7   7  -8   50.29    4.90
   7  -7   8   53.39    4.50
  -7   7   8   49.30    4.40
   7  -7  -8   45.30    4.10
  -7   7  -8   46.90    4.60
  -7  -7   8   46.80    3.70
   0   8  -8    5.80    3.00
   0  -8   8   14.90    3.00
   0   8  -8   13.40    3.50
   0   8   8   11.70    3.10
   0   8   8    8.80    2.40
   0   8  -8   30.40   14.10
  -1   8   8  229.08   13.60
  -1   8   8  233.78   13.30
   1  -8   8  238.18   13.20
   1   8  -8  229.98   16.10
   1   8  -8  225.38   14.10
  -1  -8   8  241.48   13.20
  -1  -8   8  241.08   13.10
  -1   8  -8  240.68   16.10
  -1   8  -8  238.48   14.80
   1   8   8  231.88   12.80
   2   8  -8   61.29    7.50
   2  -8   8   65.39    5.60
   2   8  -8   56.59    8.20
  -2   8   8   63.39    6.00
   2  -8   8   66.39    8.30
  -2  -8   8   58.59    5.30
  -2   8  -8   65.69    7.00
  -2   8  -8   67.09    7.50
  -2  -8   8   65.79    5.50
   3  -8   8   76.79    6.50
   3  -8   8   85.99    6.50
   3   8  -8   85.99    8.80
  -3   8   8   82.49    6.70
  -3   8  -8   83.19    8.10
  -3  -8   8   83.09    6.30
  -3  -8   8   83.99    6.40
  -3   8  -8   80.39    7.90
   4  -8   8    4.80    1.60
   4   8  -8    8.00    2.60
  -4   8   8    5.30    1.80
   4  -8   8    9.60    2.50
  -4  -8   8    4.40    1.50
  -4   8  -8   10.20    3.20
  -4   8  -8    3.30    2.60
  -4  -8   8    7.10    2.00
   5   8  -8   66.09    6.80
   5  -8   8   63.09    4.60
   5  -8   8   77.99    7.10
  -5   8   8   72.79    5.60
  -5  -8   8   51.69    6.20
  -5  -8   8   67.19    5.30
  -5   8  -8   68.79    6.60
  -6   8   8   81.39    5.40
   6  -8   8   73.19    5.80
   6   8  -8   86.39    7.10
  -6   8  -8   89.89    6.70
  -6  -8   8   86.49    5.50
   7  -8   8   86.09    4.90
   7   8  -8   81.09    6.00
  -7  -8   8   86.89    4.90
   0   9   8   49.10    5.20
   0  -9   8   44.20    4.30
   0   9  -8   42.30    5.20
   0   9   8   41.70    4.40
   0  -9   8   40.20    4.40
   0   9  -8   42.00    6.10
   1   9  -8  146.89    9.50
   1  -9   8  143.39    9.20
  -1   9   8  150.38    9.50
  -1   9   8  146.39    9.30
   1  -9   8  142.49    8.50
   1   9  -8  146.29   11.40
  -1  -9   8  148.69    9.30
  -1  -9   8  149.49    9.00
  -1   9  -8  141.49   10.30
   1   9   8  134.49    8.50
  -1   9  -8  143.09   11.20
   2   9  -8   36.50    5.50
   2   9  -8   40.60    4.80
   2  -9   8   38.50    4.10
  -2   9   8   39.90    4.40
   2  -9   8   36.30    3.60
  -2  -9   8   40.00    4.00
  -2  -9   8   36.50    4.00
  -2   9  -8   37.90    5.10
  -2   9  -8   42.20    5.30
   3  -9   8   41.50    4.10
   3   9  -8   34.20    5.10
  -3   9   8   36.70    4.20
  -3   9  -8   37.10    6.80
  -3  -9   8   41.40    4.00
  -3  -9   8   38.40    4.00
  -3   9  -8   38.40    4.90
   4   9  -8  315.57   17.00
   4  -9   8  299.47   14.20
  -4   9   8  285.57   14.60
  -4   9  -8  298.27   16.20
  -4  -9   8  290.17   15.00
  -4  -9   8  281.57   14.30
  -5   9   8    7.40    1.60
   5   9  -8    8.40    2.40
   5  -9   8    9.90    1.70
  -5   9  -8    9.40    2.60
  -5  -9   8    7.40    1.90
  -5  -9   8    7.90    1.80
   6   9  -8   32.80    3.80
  -6   9   8   29.80    2.60
  -6  -9   8   29.60    2.80
   0  10   8    2.20    1.60
   0  10  -8    5.70    4.30
   0  10  -8    4.80    2.10
   0 -10   8    3.80    1.30
   0 -10   8    8.20    3.20
   1  10  -8  116.19    7.60
   1  10  -8  128.19    9.30
   1 -10   8  115.29    6.90
   1 -10   8  122.49    7.80
  -1  10  -8  111.59    9.00
  -1 -10   8  123.69    7.70
  -1 -10   8  120.99    7.40
  -1  10  -8  123.49    8.60
   2 -10   8  148.19    8.80
   2 -10   8  143.99    9.70
   2  10  -8  119.89   12.60
  -2  10  -8  140.59    9.40
  -2 -10   8  174.78   10.50
  -2 -10   8  161.18    9.50
  -2  10  -8  155.38    9.60
   3 -10   8   45.80    3.80
   3  10  -8   46.60    5.10
  -3  10   8   47.80    3.90
  -3  10  -8   43.20    4.50
  -3 -10   8   41.00    3.70
  -3 -10   8   46.90    3.60
   4 -10   8   29.20    3.10
  -4  10   8   22.60    2.60
  -4  10  -8   27.40    3.20
  -4 -10   8   21.60    2.60
  -4 -10   8   23.80    2.40
   0  11  -8  115.39    7.00
   0 -11   8   90.19    5.50
   0 -11   8   99.69    6.10
   0  11  -8   95.09    5.80
   1 -11   8   28.40    2.90
  -1  11   8   24.90    2.50
   1  11  -8   33.80    3.30
  -1  11  -8   25.50    2.90
  -1 -11   8   29.60    2.80
  -1 -11   8   25.70    3.30
  -2  11   8   19.50    2.30
   2  11  -8   16.80    2.50
   2 -11   8   15.50    2.10
  -2 -11   8   24.10    2.90
  -2 -11   8   18.00    2.20
  -2  11  -8   15.30    2.30
  -3  11   8    2.00    0.90
   3  11  -8    1.10    1.20
  -3 -11   8    0.40    0.80
  -3 -11   8    1.50    1.30
  -3  11  -8    2.40    1.30
   0   0   9    1.40    1.90
   0   0  -9    1.30    1.00
   1   0  -9  111.79    8.00
  -1   0   9  111.69    7.90
  -1   0   9  123.29    9.00
   1   0   9  114.49    9.60
   1   0   9  115.79    7.60
   2   0   9 1506.25   65.39
   2   0   9 1549.84   61.99
  -2   0   9 1342.67   67.39
  -2   0   9 1444.26   62.69
   2   0  -9 1555.94   62.09
   3   0   9  175.58   11.90
   3   0   9  178.18   13.90
  -3   0   9  179.68   12.60
   3   0  -9  179.58   11.60
  -3   0   9  161.08    9.90
   4   0   9  223.08   17.10
   4   0  -9  245.88   13.90
  -4   0   9  209.58   11.60
   4   0   9  214.08   13.10
  -4   0   9  227.18   12.60
  -4   0   9  237.28   12.50
  -4   0   9  265.87   18.70
   5   0   9  143.29   14.50
  -5   0   9  155.98    9.60
   5   0  -9  147.89   11.00
  -5   0   9  167.98    9.70
  -5   0   9  139.69    8.70
   5   0   9  151.38   10.30
  -5   0   9  162.78   14.50
  -6   0   9  266.07   14.50
  -6   0   9  274.57   14.30
   6   0   9  265.87   15.10
   6   0  -9  264.07   17.10
   6   0   9  241.38   21.00
  -7   0   9   44.20   15.80
  -7   0   9   74.69    6.40
   7   0   9   76.99   10.60
   8   0   9   12.00    2.50
  -8   0   9    8.10    2.00
  -9   0   9   86.29    5.80
   9   0  -9  108.59    6.40
   0  -1  -9    2.50    1.30
   0   1  -9    3.40    1.60
   1  -1   9  142.39   10.20
  -1   1   9  134.99    8.00
   1   1  -9  130.89    9.10
  -1   1   9  143.89    8.40
  -1  -1   9  133.89   11.30
   1   1   9  147.59   11.00
   1  -1  -9  142.19    9.00
   2   1  -9  280.17   15.00
  -2   1   9  256.87   15.90
  -2   1   9  285.97   15.10
   2  -1   9  280.37   17.40
   2  -1   9  245.98   16.10
  -2  -1   9  271.17   16.30
   2  -1  -9  291.97   14.80
   2   1   9  285.57   17.80
   3  -1   9  567.24   28.80
  -3   1   9  619.64   28.60
  -3   1   9  675.43   31.60
   3  -1   9  668.13   33.70
  -3   1   9  644.94   29.60
   3   1  -9  699.23   30.40
  -3  -1   9  648.94   32.70
   3   1   9  663.73   34.10
   3  -1  -9  668.53   29.60
  -3  -1   9  627.84   28.70
  -3  -1   9  614.74   28.20
  -4   1   9   16.80    2.80
  -4   1   9   19.20    5.00
   4   1  -9   17.60    3.80
  -4   1   9   28.40    3.90
  -4   1   9   20.60    3.30
   4  -1   9   16.00    3.40
  -4  -1   9   17.90    3.30
  -4  -1   9   21.40    7.90
   4  -1  -9   19.30    3.80
   4   1   9   19.10    3.60
   4   1   9   10.30    4.40
  -4  -1   9   13.60    2.50
  -4  -1   9   18.70    3.10
   5  -1   9   39.30    9.10
  -5   1   9   31.30    6.90
  -5   1   9   37.80    4.40
  -5   1   9   41.00    4.40
  -5   1   9   43.00    4.20
   5   1  -9   50.19    6.30
   5  -1   9   41.20    5.30
   5   1   9   33.60    5.00
  -5  -1   9   45.10    8.50
  -5  -1   9   41.40    4.60
  -5  -1   9   38.90    4.10
   5  -1  -9   40.70    5.90
  -5  -1   9   41.00    4.20
   5   1   9   29.00    7.20
   6   1  -9   52.99    7.50
  -6   1   9   47.20   12.80
   6  -1   9   66.39    6.40
  -6   1   9   58.39    5.40
  -6   1   9   49.60    5.40
  -6   1   9   60.29    5.20
   6  -1   9   40.90   10.10
   6   1   9   52.29   11.10
  -6  -1   9   57.29    5.60
  -6  -1   9   57.19   12.10
   6   1   9   46.60    5.90
   6  -1  -9   60.09   13.20
  -6  -1   9   56.89    5.20
   6  -1  -9   65.79    8.00
  -7   1   9   85.99    8.90
  -7   1   9  108.99   19.20
   7  -1   9  102.79   10.60
  -7  -1   9  121.79    9.10
  -7  -1   9  103.99    8.50
   7   1   9  104.09    7.90
  -8   1   9  235.98   12.80
   8  -1   9  236.58   13.00
  -8   1  -9  258.77   13.60
  -8  -1   9  237.78   12.70
  -9   1   9    6.20    1.80
   9  -1   9    6.40    1.90
   9   1  -9    3.90    1.90
  -9  -1  -9    5.50    1.70
  -9  -1   9    7.40    1.70
  -9   1  -9    6.10    1.90
   9  -1  -9    5.70    1.50
   0   2  -9 1349.66   58.39
   0  -2  -9 1400.66   57.79
   0   2   9 1385.66   59.89
   1   2  -9  609.94   28.60
   1  -2  -9  633.44   27.90
   1   2   9  603.14   30.70
  -2   2   9  103.29    7.00
  -2   2   9  109.29    9.20
   2  -2  -9  114.79    7.50
   2   2   9   98.69   13.50
  -2  -2   9  107.49    9.60
   3   2  -9   10.60    3.00
   3  -2   9   14.80    3.70
  -3   2   9    9.10    2.00
   3  -2   9    8.90    4.00
  -3   2   9    8.90    3.20
  -3   2   9    6.90    8.40
  -3   2   9   12.40    2.70
  -3   2   9    9.20    2.50
   3  -2  -9    6.60    2.00
  -3  -2   9    9.90    4.00
  -3  -2   9    6.40    2.10
  -3  -2   9   12.20    2.60
   3   2   9   19.10    5.40
   4  -2   9   11.40    5.10
  -4   2   9   13.10    4.80
   4   2  -9   20.60    4.00
   4  -2   9    9.40    2.50
  -4   2   9   11.60    2.70
  -4   2   9   17.00    2.70
   4   2  -9    8.20    4.50
  -4   2   9   18.10    3.20
  -4  -2   9   15.70    2.90
  -4  -2   9   23.60    6.50
  -4  -2   9   16.90    3.00
   4  -2  -9   20.60    4.00
   4   2   9   13.40    5.00
   4   2   9   21.40    4.30
  -5   2   9   40.00    4.00
   5   2  -9   30.00    6.40
   5   2  -9   32.50    6.30
  -5   2   9   52.59    5.70
   5   2   9   35.20    6.40
   5  -2  -9   43.60    7.00
  -5  -2   9   45.90    5.20
  -5  -2   9   42.40    8.30
   6   2  -9  279.37   17.70
  -6   2   9  275.97   15.20
  -6   2   9  282.97   15.00
  -6   2   9  235.98   19.30
  -6   2   9  265.77   13.70
   6  -2   9  285.07   15.90
  -6  -2   9  299.67   23.50
   6  -2  -9  239.08   17.60
  -6  -2   9  273.37   14.50
  -6  -2   9  282.87   14.40
   6   2   9  236.28   21.80
  -7   2   9   -5.20   11.70
  -7   2   9   25.40    3.60
   7  -2   9   13.50    3.00
  -7  -2   9   -2.10   15.50
  -7  -2   9   26.00    3.70
  -7  -2   9   24.80    3.60
  -7   2  -9   18.90    3.50
   8  -2   9   30.60    3.80
   8   2  -9   23.00    4.00
  -8   2   9   22.10    3.10
  -8   2  -9   30.90    4.10
  -8  -2   9   22.40    3.10
   9  -2   9    6.00    1.60
  -9   2   9    5.90    1.80
   9  -2  -9    7.50    1.80
  -9   2  -9    5.00    1.80
  -9  -2   9    5.30    1.80
   0  -3  -9 1150.08   48.50
   0   3   9 1190.48   51.29
   0   3  -9 1107.89   49.70
   1   3  -9  288.17   20.10
   1  -3  -9  311.27   15.20
  -1   3  -9  315.37   18.00
   1   3   9  306.57   18.60
  -2   3   9   27.80    3.30
   2   3  -9   25.60    5.10
   2   3  -9   32.80    4.50
   2  -3   9   24.80    3.90
  -2   3   9   33.30    4.30
   2   3   9   33.30    6.20
   2  -3  -9   37.50    4.20
  -2  -3   9   37.50    3.80
  -3   3   9  710.43   32.00
  -3   3   9  678.43   31.10
  -3   3   9  668.73   32.90
   3   3  -9  748.03   32.90
  -3   3   9  675.83   30.30
  -3   3   9  692.13   31.50
   3  -3   9  672.03   31.70
   3  -3  -9  771.82   31.20
  -3   3  -9  619.84   31.30
  -3  -3   9  709.13   30.60
  -3  -3   9  678.63   30.60
   3   3   9  739.33   37.40
  -3  -3   9  713.63   37.10
  -4   3   9  749.23   34.10
   4  -3   9  737.63   34.50
   4   3  -9  728.63   36.10
  -4   3   9  758.22   36.50
  -4   3   9  740.93   32.70
   4   3  -9  787.92   35.50
  -4   3   9  780.52   34.00
  -4  -3   9  749.62   33.00
  -4  -3   9  781.62   41.20
  -4   3  -9  694.03   34.00
  -4  -3   9  742.63   33.00
   4   3   9  784.22   41.00
   4  -3  -9  806.52   34.30
  -4  -3   9  729.43   32.10
   4   3   9  749.92   37.90
   5   3  -9   83.99    8.50
   5   3  -9   69.59    9.80
  -5   3   9   82.49    6.20
  -5   3   9   88.79    7.20
  -5   3   9   79.89   10.20
  -5   3   9   98.49    7.40
   5  -3   9   87.39    7.70
   5  -3  -9   70.59    9.70
   5   3   9   89.59   12.00
  -5   3  -9   88.89    7.50
  -5  -3   9   84.39    6.50
  -5  -3   9   89.99    6.60
   6   3  -9   27.60    5.70
  -6   3   9   34.50    4.00
  -6   3   9   39.90    9.00
  -6   3   9   38.70    4.80
   6   3  -9   21.90    7.70
   6  -3   9   36.40    5.00
  -6   3  -9   39.40    4.90
  -6  -3   9   40.50    4.20
  -6  -3   9   36.80    4.40
  -7   3   9   55.79    5.00
   7   3  -9   51.09    7.60
   7  -3   9   55.09    5.90
  -7   3   9   61.89    5.60
  -7   3  -9   63.69    6.00
  -7  -3   9   60.99    5.20
  -7  -3   9   59.59    5.20
   8  -3   9  105.39    7.30
   8   3  -9  107.09    7.90
  -8   3   9   96.99    6.80
  -8  -3   9   94.49    6.40
  -8   3  -9  102.69    7.50
   8  -3  -9  104.39    7.40
   9  -3   9    6.40    1.40
  -9   3  -9    6.00    2.10
   9  -3  -9    4.40    1.80
  -9  -3   9    5.60    1.80
   0   4   9  870.21   38.80
   0  -4   9  841.32   35.30
   0   4  -9  870.31   37.60
   0   4   9  768.02   34.90
   0  -4  -9  828.32   34.90
   0  -4   9  741.43   35.30
  -1   4   9  444.66   22.70
   1  -4   9  363.96   19.30
  -1  -4  -9  385.96   19.60
   1   4  -9  414.66   20.70
   1  -4   9  395.96   18.90
  -1   4  -9  406.76   21.10
   1   4   9  429.96   23.30
  -1  -4   9  381.46   18.90
   1  -4  -9  382.96   18.00
  -2   4   9  702.03   30.90
   2  -4   9  651.63   29.70
  -2   4   9  655.93   29.80
   2   4  -9  660.03   33.30
   2  -4   9  668.33   31.00
   2   4  -9  728.03   32.20
   2   4   9  726.73   35.80
  -2  -4   9  698.73   30.10
  -2  -4   9  682.43   29.90
  -2   4  -9  641.34   31.20
   3   4  -9  185.88   13.40
  -3   4   9  187.98   10.70
   3  -4   9  180.98   11.70
  -3   4   9  209.68   10.30
  -3   4   9  209.78   12.00
  -3  -4   9  195.48   17.80
   3   4   9  220.48   22.00
  -3   4  -9  156.58   11.40
   3   4   9  192.28   14.50
  -3  -4   9  197.08   11.00
  -3  -4   9  199.48   10.90
   4   4  -9  891.71   42.20
  -4   4   9  828.52   45.30
  -4  -4   9  884.31   37.40
  -4  -4   9  995.30   49.10
  -4   4  -9  873.21   39.90
   4   4   9  888.91   43.60
   4   4   9  825.92   57.09
  -5   4   9  180.58   10.70
   5  -4   9  202.98   12.70
   5   4  -9  194.08   13.60
   5   4  -9  172.78   13.10
  -5   4   9  195.08   11.90
  -5   4   9  145.99   20.40
  -5  -4   9  187.08   11.00
  -5  -4   9  201.78   11.20
   5   4   9  174.18   18.00
  -5   4  -9  199.28   12.60
   5   4   9  213.68   15.50
   6   4  -9   86.59   10.20
  -6   4   9   92.09    7.30
   6  -4   9   83.29    7.40
  -6   4   9   79.19    6.60
  -6  -4   9   88.79    6.50
  -6  -4   9   72.89    6.20
  -6   4  -9   79.69    7.40
  -6  -4   9  120.29   29.80
  -7   4   9   14.90    2.70
   7  -4   9   19.30    3.40
   7   4  -9   20.10    4.00
  -7   4   9   10.70    2.50
  -7  -4   9   13.00    2.50
  -7   4  -9   12.10    3.00
  -7  -4   9   15.40    2.80
  -8   4   9    7.80    2.20
   8  -4   9    5.80    2.20
   8  -4  -9    7.50    2.50
  -8   4  -9    9.30    2.60
   9  -4   9   27.30    2.50
   9  -4  -9   28.00    3.40
  -9  -4   9   19.80    2.10
  -9   4  -9   28.50    3.20
   0  -5   9    2.60    1.80
   0   5  -9    1.40    1.90
   0  -5   9    3.80    1.40
   0  -5   9    4.30    2.50
   0   5   9    2.90    1.50
  -1   5   9   72.19    5.50
   1   5  -9   61.59    6.50
   1   5  -9   59.79    7.00
   1  -5   9   65.39    5.40
   1  -5   9   62.59    5.70
  -1   5  -9   54.99    6.40
  -1  -5   9   61.29    5.30
  -1   5  -9   59.49    6.50
   1   5   9   56.39    5.30
  -1  -5   9   61.29    5.20
   1   5   9   68.09    8.70
  -1  -5   9   49.40    5.20
   2  -5   9  701.13   32.60
  -2   5   9  706.03   31.80
   2  -5   9  730.43   31.60
   2   5  -9  715.13   35.60
   2   5  -9  630.84   38.10
  -2   5   9  752.42   33.10
   2   5   9  728.73   37.70
  -2   5  -9  721.03   33.60
  -2  -5   9  744.33   31.90
  -2   5  -9  741.53   34.70
  -2  -5   9  721.23   31.60
   3  -5   9  152.68    9.20
  -3   5   9  170.48   13.70
   3  -5   9  160.68   10.70
   3   5  -9  195.58   16.80
   3   5  -9  170.18   11.50
  -3   5  -9  163.58   12.20
  -3  -5   9  188.68   13.90
  -3  -5   9  167.28   17.20
   3   5   9  147.59   14.80
  -3   5  -9  136.69   10.80
   3   5   9  137.49   12.00
   4  -5   9  268.57   13.70
  -4   5   9  271.37   15.50
   4   5  -9  263.47   17.30
   4   5  -9  300.87   16.90
  -4   5   9  244.38   12.70
   4  -5   9  274.27   15.60
  -4   5   9  261.57   14.20
  -4  -5   9  273.37   14.40
  -4   5  -9  262.17   15.90
   4   5   9  275.37   22.00
   4   5   9  280.47   18.40
  -4  -5   9  263.87   23.10
  -4  -5   9  284.17   14.40
  -4  -5   9  267.97   13.50
   5   5  -9  127.29   10.60
   5  -5   9  142.69   10.10
  -5   5   9  148.59   10.10
  -5   5   9  107.89   10.40
   5   5  -9  139.59   12.50
  -5   5   9  131.19    8.70
  -5  -5   9  130.19    8.40
   5   5   9  129.79   12.00
  -5  -5   9  151.48   21.20
  -5   5  -9  129.49   10.00
  -5  -5   9  143.69    8.90
   5   5   9   98.89   17.10
   6  -5   9   64.69    6.30
  -6   5   9   61.99    6.00
  -6   5   9   56.29    5.00
  -6   5  -9   57.89    6.10
  -6  -5   9   55.79    5.10
  -6  -5   9   56.29    4.90
  -7   5   9  111.99    8.10
   7   5  -9  100.89   11.90
  -7   5   9  131.39    7.40
   7  -5   9  126.99    8.60
  -7  -5   9  132.39    7.60
  -7   5  -9  127.29    8.70
  -7  -5   9  112.69    7.40
   7  -5  -9  131.99    8.40
   8  -5   9   10.60    2.10
   8  -5  -9    8.40    2.10
  -8  -5   9    9.30    1.90
  -8   5  -9   10.40    2.40
   0   6  -9   68.69    7.80
   0  -6   9   67.59    6.00
   0  -6   9   61.29    5.90
   0   6  -9   78.89    7.60
   0   6   9   76.39    7.40
   0   6  -9   87.19    7.90
   0   6   9   76.19    6.00
   0  -6   9   63.79    5.50
   1  -6   9  111.09    7.90
   1   6  -9  139.99   10.20
  -1   6   9  127.89    9.50
   1  -6   9  130.19    9.00
   1  -6   9  128.79    8.60
  -1   6  -9  126.59    9.70
  -1   6  -9  128.79   10.10
  -1  -6   9  131.89    8.30
   1   6   9  106.19   13.20
   2   6  -9  310.07   19.50
  -2   6   9  307.77   16.10
   2   6  -9  301.57   21.30
   2  -6   9  286.97   17.40
   2  -6   9  335.17   16.10
  -2  -6   9  330.37   16.40
   2   6   9  311.27   15.80
  -2  -6   9  317.27   16.00
  -2   6  -9  319.17   18.30
   2   6   9  308.57   22.40
   3  -6   9  188.98   10.70
   3   6  -9  199.08   14.20
   3  -6   9  185.48   11.70
  -3   6   9  180.58   11.00
   3   6  -9  193.48   12.90
  -3   6  -9  173.88   13.50
  -3   6  -9  181.28   12.60
   3   6   9  192.58   17.80
  -3  -6   9  198.18   20.70
  -3  -6   9  191.28   11.00
   3   6   9  202.18   14.00
  -3  -6   9  183.88   10.90
  -4   6   9  565.24   25.40
   4   6  -9  551.14   28.70
   4  -6   9  542.05   24.20
   4  -6   9  535.15   26.30
   4   6  -9  490.65   31.00
  -4  -6   9  555.04   25.10
  -4  -6   9  453.05   50.09
  -4   6  -9  551.74   27.30
   4   6   9  513.45   28.90
  -4  -6   9  553.94   25.00
   5   6  -9  399.26   22.20
   5  -6   9  395.06   20.70
  -5   6   9  374.46   19.20
  -5  -6   9  394.46   18.90
  -5   6  -9  395.06   21.30
  -5  -6   9  409.56   19.50
   6   6  -9   77.59    7.60
  -6   6   9   85.29    6.20
   6  -6   9   96.69    7.50
  -6  -6   9   88.49    6.30
   6  -6  -9   93.29    6.80
  -6   6  -9   89.39    7.50
  -6  -6   9   88.69    6.10
  -7   6   9   29.00    3.70
   7  -6   9   42.20    5.10
   7   6  -9   34.00    4.40
  -7  -6   9   33.00    4.40
   7  -6  -9   36.90    3.70
  -7   6  -9   41.50    4.90
   8  -6   9   35.30    3.20
  -8   6  -9   33.80    3.30
  -8  -6   9   32.60    3.10
   8  -6  -9   28.60    2.80
   0   7  -9  290.97   17.20
   0  -7   9  293.77   15.20
   0   7   9  310.97   16.10
   0  -7   9  308.87   16.00
   0  -7   9  291.87   15.30
   0   7  -9  278.97   24.10
   0   7  -9  321.97   19.80
   0   7   9  329.27   16.20
   1  -7   9  199.48   11.80
   1   7  -9  217.38   15.50
   1  -7   9  210.18   11.90
   1  -7   9  192.98   11.10
   1   7  -9  199.58   13.70
   1   7  -9  207.88   12.70
  -1   7   9  222.08   12.30
  -1   7  -9  215.58   15.20
  -1  -7   9  201.88   11.60
  -1   7  -9  196.88   13.50
  -1  -7   9  210.88   12.00
   1   7   9  220.28   11.80
   2  -7   9  660.33   30.90
   2   7  -9  683.23   35.00
  -2   7   9  701.83   31.20
   2   7  -9  659.83   32.50
   2  -7   9  688.63   30.70
  -2  -7   9  701.43   31.00
  -2   7  -9  684.93   32.90
  -2  -7   9  684.33   30.60
   3  -7   9  461.25   21.20
   3   7  -9  444.36   24.60
   3  -7   9  431.86   21.90
  -3   7   9  447.66   21.70
   3   7  -9  476.45   25.50
   3   7   9  407.06   31.30
  -3  -7   9  444.56   21.30
  -3  -7   9  433.16   21.10
  -3   7  -9  435.76   23.40
   4  -7   9  176.38    9.80
  -4   7   9  178.98   10.60
   4   7  -9  194.58   13.40
   4  -7   9  182.68   11.30
  -4  -7   9  173.08   10.30
  -4  -7   9  170.38   10.10
  -4   7  -9  167.08   11.90
   4  -7  -9  145.89    9.70
   5   7  -9   44.30    5.80
  -5   7   9   44.80    4.30
   5  -7   9   48.30    5.10
  -5  -7   9   48.70    4.20
  -5  -7   9   44.30    4.40
   5  -7  -9   34.40    4.40
  -5   7  -9   43.70    5.50
   6  -7   9   25.50    4.00
   6   7  -9   34.40    4.50
  -6  -7   9   24.30    3.00
  -6  -7   9   27.20    3.00
   6  -7  -9   20.60    3.30
  -6   7  -9   23.90    3.80
   7  -7   9   89.29    7.60
   7   7  -9   90.79    6.60
   7  -7  -9   84.09    5.50
  -7  -7   9  107.49    5.90
  -7   7  -9  114.39    7.70
   0   8  -9  101.99    9.40
   0  -8   9  112.99    7.70
   0   8  -9  111.89   10.20
   0  -8   9  100.19    7.10
   0   8   9  108.19    7.70
   1  -8   9   83.59    6.70
   1  -8   9   95.89    8.60
   1   8  -9   80.69    7.40
  -1   8   9   82.79    6.70
   1   8  -9   92.29    9.10
  -1   8  -9   84.99    8.80
  -1  -8   9   76.99    6.70
  -1  -8   9   88.59    6.80
  -1   8  -9   97.59   11.00
   2  -8   9  124.89    8.30
   2  -8   9  115.39    7.80
   2   8  -9  146.59   14.20
  -2   8   9  110.49    8.60
  -2  -8   9  119.49    8.00
  -2  -8   9  127.29    9.20
  -2   8  -9  119.29    9.50
  -2   8  -9  124.99   10.40
   3  -8   9   48.60    4.40
   3  -8   9   48.70    4.70
  -3   8   9   41.20    4.60
   3   8  -9   43.90    6.00
  -3   8  -9   39.30    5.80
  -3   8  -9   42.50    5.30
  -3  -8   9   41.70    4.40
  -3  -8   9   41.50    4.30
   4   8  -9  110.59    9.40
   4  -8   9  123.69    7.30
   4  -8   9  115.49    7.70
  -4   8   9  110.19    7.70
  -4  -8   9  116.49    7.50
  -4   8  -9  119.59    9.00
  -4   8  -9  113.29    9.00
  -4  -8   9  119.69    7.50
  -5   8   9   70.79    5.60
   5   8  -9   86.79    7.40
   5  -8   9   85.49    6.10
  -5  -8   9   80.09    5.30
  -5   8  -9   85.99    7.30
  -5  -8   9   71.79    5.50
   6  -8   9    8.60    1.90
  -6   8   9    4.10    1.60
   6   8  -9    5.60    2.00
  -6  -8   9    2.90    1.20
  -6   8  -9    5.00    1.90
   0  -9   9   62.09    5.40
   0   9  -9   60.79    5.70
   0  -9   9   67.19    5.10
   0   9  -9   57.99    7.00
   0   9   9   60.89    5.20
   1  -9   9   15.90    2.70
   1   9  -9   14.30    3.80
  -1   9   9   14.40    2.90
   1   9  -9   10.50    2.80
   1  -9   9   13.70    2.50
  -1   9  -9   14.90    3.30
  -1  -9   9   16.80    2.60
  -1   9  -9    7.30    2.70
  -1  -9   9   11.90    2.40
   1   9   9    9.80    2.30
   2  -9   9   57.59    4.90
   2   9  -9   55.59    6.50
  -2   9   9   51.49    5.00
  -2  -9   9   49.80    4.50
  -2   9  -9   60.39    6.20
  -2  -9   9   56.69    4.80
  -2   9  -9   45.40    5.10
  -3   9   9    9.60    2.30
   3  -9   9   13.80    2.30
   3   9  -9    7.20    2.30
  -3   9  -9   18.90    3.30
  -3  -9   9   11.50    2.30
  -3  -9   9   14.90    2.40
  -3   9  -9   20.90    3.80
   4  -9   9   39.30    3.20
  -4  -9   9   34.10    3.20
  -4  -9   9   33.50    4.10
  -4   9  -9   35.90    4.20
   5   9  -9   13.40    2.70
  -5  -9   9   12.50    2.10
  -5  -9   9   15.80    2.10
  -5   9  -9   19.20    3.30
   0 -10   9   93.19    6.50
   0  10  -9   95.89    8.80
   0 -10   9   97.89    5.90
   0  10   9   96.19    6.90
   0  10  -9   97.99    7.80
   1 -10   9  271.47   13.00
  -1  10   9  263.37   13.20
   1 -10   9  297.17   15.20
   1  10  -9  280.17   15.50
  -1  10  -9  265.87   13.80
  -1 -10   9  267.47   13.10
  -1 -10   9  287.77   14.40
  -1  10  -9  257.47   14.50
   2  10  -9    9.90    2.70
  -2  10   9    8.50    1.70
   2 -10   9   11.40    2.10
  -2 -10   9    6.40    1.50
  -2 -10   9   10.40    2.10
  -2  10  -9   10.30    3.30
  -2  10  -9   10.00    2.40
   3  10  -9   56.29    5.20
  -3  10   9   46.70    3.90
   3 -10   9   48.80    5.10
  -3 -10   9   51.49    3.80
  -3 -10   9   56.79    4.20
  -3  10  -9   50.99    4.50
   4 -10   9  181.08    9.10
   4  10  -9  193.78   10.40
  -4  10   9  170.58    8.70
  -4 -10   9  178.78    8.70
  -4  10  -9  171.08    9.20
  -4 -10   9  172.88    8.30
   0 -11   9   95.09    5.80
   1 -11   9  155.48    8.10
   1  11  -9  171.18    8.60
  -1 -11   9  157.28    8.10
  -1 -11   9  152.88    7.50
  -2  11   9    4.70    1.10
   2  11  -9    6.90    1.70
   2 -11   9    6.40    1.30
  -2 -11   9    5.40    1.00
  -2 -11   9    3.00    0.90
   0   0  10 5006.80  193.98
   0   0 -10 4823.92  195.38
  -1   0  10   19.80    4.40
   1   0  10   11.10    3.60
  -1   0  10   11.00    2.80
   1   0 -10   12.60    2.90
  -2   0  10  315.07   20.10
   2   0  10  349.96   21.00
   2   0 -10  342.57   18.60
   2   0  10  347.07   17.30
  -2   0  10  332.97   18.50
  -2   0  10  330.57   16.70
  -3   0  10   84.39    6.40
  -3   0  10   67.69    7.60
   3   0 -10   92.79    7.50
   3   0  10   69.69    6.40
   3   0  10   84.59    9.80
   3   0  10   84.49    7.80
  -4   0  10 1226.88   51.49
  -4   0  10 1270.67   52.49
   4   0 -10 1239.28   55.09
  -4   0  10 1252.97   52.59
  -4   0  10 1271.07   57.89
   4   0  10 1229.68   53.29
   5   0 -10    1.70    3.30
  -5   0  10    0.20    1.50
   5   0  10   -3.90    4.30
  -5   0  10   -1.10    1.40
  -5   0  10    4.80    5.70
  -6   0  10   74.99    5.70
  -6   0  10   78.99    6.10
   6   0  10   65.99    6.50
   6   0 -10   56.99    8.70
  -6   0  10   67.99    6.10
  -6   0  10   58.19   11.10
  -7   0  10   89.09    6.70
  -7   0  10   65.19   16.00
  -7   0  10   92.09    7.00
   7   0  10   88.79    7.10
   8   0  10   43.40    4.30
  -8   0  10   45.10    4.30
   9   0 -10  229.38   10.80
  -9   0  10  198.68   10.60
  -9   0 -10  228.48   12.30
   0   1 -10    4.70    2.10
   0  -1  10    8.00    4.10
   0  -1 -10    4.30    1.90
  -1   1  10  188.38    9.90
   1  -1  10  196.08   13.00
   1   1 -10  192.18   12.20
  -1   1  10  181.78    9.70
   1   1  10  183.68   14.10
  -1  -1  10  191.38   12.30
  -1  -1  10  187.18   14.40
   1  -1 -10  200.68   11.80
  -2   1  10  287.37   15.30
   2  -1  10  264.47   14.60
   2  -1  10  273.17   17.20
   2   1 -10  314.07   16.10
  -2   1  10  268.37   13.70
  -2   1  10  261.07   14.40
   2  -1  10  309.57   18.80
  -2  -1  10  270.27   14.00
   2   1  10  272.27   18.40
  -2  -1  10  255.37   13.60
   2  -1 -10  300.67   15.60
  -2  -1  10  292.77   17.10
  -3   1  10   28.10    5.20
   3   1 -10   29.40    4.50
  -3   1  10   25.90    3.70
   3  -1  10   28.20    6.30
  -3   1  10   35.90    7.90
   3  -1  10   24.90    4.00
  -3   1  10   18.90    3.00
  -3  -1  10   21.90    3.30
  -3  -1  10   27.20    5.00
  -3  -1  10   22.20    4.70
   3  -1 -10   29.80    4.30
   3   1  10   19.20    5.10
   3   1  10   31.00    4.40
  -4   1  10  146.29    9.30
   4  -1  10  123.79    9.30
  -4   1  10  155.68   12.60
  -4   1  10  142.39    8.90
   4  -1  10  115.69   17.40
  -4   1  10  136.69    8.30
   4   1 -10  139.19   10.20
   4   1  10  132.09    9.30
  -4  -1  10  130.59    8.70
  -4  -1  10  135.99    8.20
   4   1  10  130.29   13.70
   4  -1 -10  142.89   10.10
  -4  -1  10  147.79    8.90
  -4  -1  10  152.18   13.50
   5   1 -10   28.30    5.40
  -5   1  10   23.40    3.60
   5  -1  10   22.40    4.10
  -5   1  10   27.00    3.80
  -5   1  10   12.90    6.30
   5  -1  10   23.30    7.20
   5   1  10   39.10    6.40
  -5  -1  10   21.20    3.80
  -5  -1  10   29.70    9.00
   5  -1 -10   19.30    4.40
  -5  -1  10   29.40    3.50
   5   1  10   19.20    6.30
  -6   1  10   45.80    9.80
  -6   1  10   51.69    5.70
  -6   1  10   63.39    5.70
   6   1 -10   55.79    8.40
   6  -1  10   62.49    6.40
  -6   1  10   58.79    5.10
  -6  -1  10   60.39    5.70
   6   1  10   68.59   12.80
   6   1  10   56.49    5.90
  -6  -1  10   63.39    5.50
  -7   1  10  463.95   23.00
   7  -1  10  507.55   23.90
  -7  -1  10  501.55   23.20
   7   1  10  467.05   22.70
  -7  -1  10  505.45   22.90
   8  -1  10   82.69    7.90
  -8   1  10   74.29    5.70
  -8   1 -10   77.99    6.20
  -8  -1  10   80.29    5.80
   9   1 -10   73.19    4.50
  -9   1  10   67.29    4.70
  -9  -1 -10   55.69    5.10
  -9  -1  10   70.89    4.70
   9  -1 -10   76.29    4.90
  -9   1 -10   80.59    6.70
   0  -2 -10  170.28   10.80
   0   2 -10  161.08   11.10
   1  -2  10   21.10    3.30
  -1   2  10   20.40    2.90
  -1  -2  10   23.60    3.90
   1  -2 -10   17.80    3.50
   1   2  10   26.30    5.30
   2  -2  10  437.56   23.80
  -2   2  10  460.65   22.30
   2   2 -10  507.35   24.70
  -2   2  10  531.05   22.20
  -2   2  10  491.45   23.10
  -2   2  10  530.75   21.70
  -2  -2  10  517.75   27.00
  -2  -2  10  468.55   22.50
   2  -2 -10  502.35   23.70
   2   2  10  504.25   28.00
   3   2 -10   68.19    7.50
  -3   2  10   81.89    7.00
  -3   2  10   72.59    6.00
   3   2 -10   69.99    6.80
  -3   2  10   67.29    6.00
  -3   2  10   76.39    9.20
   3  -2  10   73.39    6.30
  -3   2  10   73.69    5.40
  -3   2 -10   63.69    6.20
   3   2  10   50.09    7.10
   3   2  10   63.19    9.20
   3  -2 -10   69.59    6.30
  -3  -2  10   68.29    5.70
  -3  -2  10   63.49    8.80
  -3  -2  10   64.99    5.10
  -3  -2  10   65.29    5.40
   4   2 -10  251.67   15.50
  -4   2  10  276.37   14.40
   4  -2  10  262.47   14.90
  -4   2  10  238.68   16.40
   4   2 -10  239.88   15.70
  -4   2  10  271.07   13.50
   4  -2  10  272.07   22.10
  -4   2  10  268.77   14.50
  -4  -2  10  276.57   13.90
   4   2  10  262.27   20.00
  -4   2 -10  244.58   14.40
  -4  -2  10  263.57   19.30
  -4  -2  10  252.97   13.70
   4  -2 -10  280.97   15.30
  -4  -2  10  256.67   13.10
   4   2  10  237.08   14.10
  -5   2  10    6.10    2.20
   5   2 -10   -0.60    4.60
  -5   2  10    1.60    1.40
  -5   2  10    0.60    4.30
   5  -2  10    1.70    6.20
   5   2 -10    3.00    3.00
  -5   2  10   -0.90    1.60
   5  -2  10   -0.10    1.70
   5   2  10   -6.70    5.00
   5   2  10    4.70    4.40
  -5  -2  10   -2.10    6.30
   5  -2 -10   10.70    4.50
  -5   2 -10    0.40    1.70
  -5  -2  10    0.00    1.50
  -5  -2  10   -1.10    1.30
   6  -2  10  197.58   12.40
   6   2 -10  185.28   14.50
  -6   2  10  201.38   10.80
  -6   2  10  200.88   12.00
  -6   2  10  207.68   12.00
  -6   2  10  150.48   15.20
   6   2  10  181.88   19.20
  -6  -2  10  211.38   11.60
  -6   2 -10  204.78   12.50
   6  -2 -10  153.08   15.70
  -6  -2  10  175.58   18.60
  -6  -2  10  198.28   11.20
   7  -2  10   62.39    5.90
  -7   2  10   63.59    5.60
  -7  -2  10   56.89    5.20
  -7   2 -10   54.69    5.50
  -7  -2  10   59.79    5.30
  -8   2  10  243.48   13.30
   8  -2  10  240.68   15.90
  -8  -2  10  278.17   13.30
  -8   2 -10  289.47   14.30
   9  -2  10    7.00    1.40
  -9   2  10    7.90    2.50
  -9  -2 -10    5.70    1.70
  -9   2 -10    5.50    1.50
   9  -2 -10   10.30    1.90
  -9  -2  10   10.60    2.40
   0  -3 -10    1.60    1.80
   0  -3  10    2.80    1.70
   0   3 -10    1.30    1.50
   0   3  10   -0.40    1.30
  -1   3  10  293.67   16.80
  -1   3  10  291.27   18.70
   1   3 -10  305.07   17.40
  -1   3 -10  328.97   18.30
  -1  -3  10  307.67   15.90
   1  -3 -10  336.27   16.40
   1   3  10  341.87   20.00
  -1  -3  10  311.47   15.80
   2  -3  10   59.69    5.70
  -2   3  10   61.39    5.90
   2   3 -10   68.89    6.70
   2   3 -10   56.49    8.80
  -2   3  10   65.09    5.10
   2   3  10   69.79    8.80
  -2  -3  10   63.89    5.40
   2  -3 -10   67.49    6.20
  -2  -3  10   60.99    9.70
  -3   3  10   82.89    6.10
  -3   3  10   84.19    7.00
   3   3 -10   79.39    8.40
   3  -3  10   86.29    7.20
  -3   3  10   84.39    7.00
   3   3 -10  101.79    9.30
  -3   3  10   96.99    6.40
  -3  -3  10   88.19    6.40
   3  -3 -10   98.49    7.60
  -3   3 -10   85.99    7.30
   3   3  10   68.99   15.30
  -3  -3  10   85.39    6.00
  -3  -3  10   92.99   10.50
  -3  -3  10   90.29    6.50
   4   3 -10   92.39    9.10
  -4   3  10   97.09    7.20
  -4  -3  10  103.69   12.70
   4  -3 -10   90.99    8.80
  -4  -3  10  109.09    6.70
   4   3  10   71.29   14.50
  -4   3 -10   92.19    7.90
   5   3 -10  324.87   19.90
  -5   3  10  361.06   17.70
   5  -3  10  375.46   19.70
   5   3 -10  382.86   21.10
  -5   3  10  392.66   31.50
  -5   3  10  382.16   19.10
  -5  -3  10  385.36   18.50
  -5  -3  10  335.37   35.20
  -5   3 -10  339.67   19.00
   5   3  10  353.36   25.90
  -5  -3  10  380.16   18.30
  -6   3  10   24.80    7.80
   6   3 -10   27.50    7.80
  -6   3  10   27.40    4.10
   6  -3  10   30.10    4.40
  -6   3  10   31.80    3.90
  -6  -3  10   31.20    3.70
  -6   3 -10   27.80    4.40
  -6  -3  10   29.20    4.00
   6   3  10    2.50   14.00
  -6  -3  10   23.50   13.60
   7  -3  10  132.99    9.20
  -7   3  10  130.39    8.80
  -7   3  10  125.19    9.50
  -7  -3  10  135.19    8.50
  -7   3 -10  124.79    9.10
  -7  -3  10  139.69    8.40
   8  -3  10   65.39    5.30
  -8   3  10   68.99    5.70
  -8   3 -10   71.49    5.90
  -8  -3  10   65.29    5.20
   9  -3  10   17.30    2.10
  -9   3 -10   11.60    2.30
  -9  -3  10   17.10    2.10
   0  -4  10    0.90    1.40
   0   4  10    5.60    1.90
   0  -4 -10   -1.80    2.40
   0  -4  10   -2.20    1.50
   0   4 -10    0.50    1.80
  -1   4  10  112.59    7.70
  -1  -4 -10  121.19    8.90
   1  -4  10  108.49    8.00
   1   4 -10  123.89    9.50
   1  -4  10  116.19    7.80
  -1  -4  10  110.59    7.70
   1   4  10  139.39    8.60
   1   4  10  118.99   11.10
   1  -4 -10  109.39    7.80
  -1  -4  10  126.39    8.00
  -1   4 -10  138.09   10.40
   2  -4  10  263.87   13.40
   2   4 -10  211.38   17.20
   2  -4  10  257.67   14.30
  -2   4  10  255.87   13.40
   2   4 -10  239.58   16.10
  -2   4  10  249.58   14.00
  -2  -4  10  272.17   13.60
   2   4  10  283.27   19.20
   2   4  10  233.18   16.10
  -2  -4  10  257.77   13.30
  -2   4 -10  249.18   16.10
  -3   4  10  114.19    8.60
   3   4 -10  132.89   10.00
  -3   4  10  113.79    7.70
   3  -4  10  110.19    7.90
   3  -4  10  104.49    8.50
   3   4 -10  124.09   10.50
  -3  -4  10  124.59    8.10
  -3   4 -10  119.49    9.10
  -3  -4  10  124.89   13.80
   3   4  10  135.19   13.30
  -3  -4  10  118.39    8.00
  -4   4  10  422.26   20.60
   4   4 -10  455.95   23.40
   4  -4  10  433.66   22.20
  -4   4  10  419.76   19.90
  -4   4  10  434.06   21.90
   4   4 -10  433.86   24.00
  -4   4 -10  403.56   21.90
  -4  -4  10  478.05   30.40
   4   4  10  428.76   28.60
  -4  -4  10  400.66   22.80
  -4  -4  10  432.26   20.80
  -4  -4  10  445.06   20.80
   5   4 -10  184.98   13.40
   5  -4  10  194.38   12.60
  -5   4  10  183.08   11.00
   5   4 -10  201.98   14.20
  -5   4  10  175.48   12.90
  -5   4  10  202.98   12.30
   5   4  10  167.98   19.00
  -5  -4  10  198.18   11.30
  -5  -4  10  217.38   21.30
  -5   4 -10  187.38   12.30
  -5  -4  10  203.38   11.40
  -6   4  10    4.40    1.90
   6  -4  10    4.00    1.90
  -6   4  10   13.00    8.10
   6   4 -10    0.70    2.60
  -6   4  10    4.80    2.00
  -6  -4  10    3.40    1.80
  -6  -4  10  -19.30   23.10
  -6  -4  10    5.30    2.00
  -6   4 -10    1.50    1.90
   7   4 -10   66.29    7.40
   7  -4  10   88.19    6.90
  -7   4  10   88.59    5.90
  -7   4  10   83.19    6.60
  -7  -4  10   85.99    5.90
  -7   4 -10   90.69    7.10
  -7  -4  10   80.29    5.90
  -8   4  10   17.70    2.80
   8  -4  10   22.40    2.90
   8  -4 -10   23.50    3.10
  -8   4 -10   17.20    2.70
  -8  -4  10   18.00    2.40
   0   5 -10  231.28   15.80
   0  -5  10  230.38   12.80
   0  -5  10  222.88   12.40
   0   5  10  224.48   12.30
   0  -5  10  222.58   11.90
   1  -5  10  774.32   33.80
  -1   5  10  748.53   33.80
   1   5 -10  809.42   36.40
   1  -5  10  735.63   34.20
   1   5 -10  776.72   38.00
  -1  -5  10  776.92   34.00
  -1  -5  10  765.32   33.40
  -1   5 -10  832.52   37.10
   1   5  10  778.92   33.60
  -1  -5  10  774.12   33.70
   1   5  10  771.32   38.70
  -1   5 -10  707.23   35.00
   2   5 -10  828.22   38.80
   2  -5  10  836.12   36.30
  -2   5  10  894.61   38.00
   2  -5  10  833.42   37.50
   2   5  10  820.42   42.80
  -2   5 -10  914.91   40.40
  -2  -5  10  815.22   36.20
  -2   5 -10  775.42   37.90
   2   5  10  818.52   35.80
   3   5 -10  376.36   20.40
   3   5 -10  357.06   21.50
   3  -5  10  373.86   20.10
   3  -5  10  363.06   19.30
  -3   5  10  358.16   18.20
  -3   5  10  397.66   19.60
  -3   5 -10  332.17   21.00
  -3  -5  10  369.96   18.30
  -3   5 -10  327.97   19.30
  -3  -5  10  353.86   17.90
   3   5  10  383.96   25.50
  -3  -5  10  416.36   30.80
   4  -5  10  832.52   37.70
   4   5 -10  874.41   39.20
   4   5 -10  830.72   39.90
  -4   5  10  894.61   38.00
  -4   5  10  822.82   36.10
  -4  -5  10  834.72   36.10
   4   5  10  787.42   45.20
  -4   5 -10  728.03   39.40
  -4  -5  10  824.42   36.00
  -4   5 -10  800.12   38.00
  -4  -5  10  799.72   34.80
  -5   5  10  222.58   12.40
  -5   5  10  206.18   13.30
   5  -5  10  223.18   13.80
   5   5 -10  224.98   16.10
  -5  -5  10  217.28   28.20
  -5  -5  10  238.28   12.70
  -5  -5  10  228.58   12.50
  -5   5 -10  228.88   14.50
   6  -5  10   30.30    4.20
  -6   5  10   27.90    4.10
   6   5 -10   28.00    4.60
  -6   5  10   23.90    3.20
  -6  -5  10   23.20    3.30
  -6   5 -10   25.70    4.50
  -6  -5  10   26.40    3.40
  -7   5  10  200.88    9.90
   7   5 -10  188.78   11.50
   7  -5  10  200.28   11.40
   7  -5 -10  214.58   11.80
  -7  -5  10  181.98   10.20
  -7   5 -10  192.78   11.70
  -7  -5  10  185.28   10.00
   8  -5 -10   82.29    5.50
  -8  -5  10   82.89    5.20
  -8   5 -10   86.49    5.80
   0   6 -10  157.58   12.50
   0   6 -10  152.18   12.40
   0  -6  10  151.68    9.40
   0   6  10  130.69    9.00
  -1   6  10  390.26   19.00
   1  -6  10  362.66   18.90
   1  -6  10  376.76   18.70
   1   6 -10  382.26   22.70
   1   6 -10  381.76   20.90
   1   6  10  335.37   24.90
  -1   6 -10  418.56   21.60
  -1  -6  10  379.16   18.90
  -1  -6  10  363.96   18.20
   1   6  10  390.36   18.50
  -2   6  10   84.09    6.80
   2   6 -10   78.49    8.40
   2  -6  10   83.79    6.90
   2  -6  10   85.59    6.50
   2   6 -10   90.69    8.90
   2   6  10   72.99   12.10
  -2  -6  10   82.69    6.50
  -2  -6  10   82.69    6.30
  -2   6 -10   96.29    8.50
  -2   6 -10   73.19    8.90
   3   6 -10 1081.79   50.39
  -3   6  10 1086.59   46.20
   3  -6  10 1099.39   47.30
   3  -6  10 1072.39   45.50
   3   6 -10 1146.69   48.90
   3   6  10 1052.69   54.59
  -3  -6  10 1142.09   46.40
  -3  -6  10 1076.59   45.90
  -3   6 -10 1076.09   48.20
  -3   6 -10  998.60   49.00
  -3  -6  10 1006.70   57.29
   4   6 -10  206.28   14.60
   4  -6  10  204.98   12.90
  -4   6  10  208.88   11.90
  -4  -6  10  205.98   11.70
  -4   6 -10  205.98   13.60
  -4  -6  10  210.38   11.80
   5  -6  10   56.59    5.60
   5   6 -10   59.79    6.60
  -5   6  10   48.40    4.90
  -5  -6  10   47.20    4.80
  -5  -6  10   55.09    4.90
  -5   6 -10   61.99    6.40
   6   6 -10   34.00    4.50
   6  -6  10   38.90    4.30
  -6   6  10   32.20    3.70
  -6  -6  10   29.50    3.50
  -6  -6  10   34.80    3.70
  -6   6 -10   35.70    4.70
   6  -6 -10   33.40    3.60
   7  -6  10   79.39    5.60
   7   6 -10   66.59    5.60
  -7  -6  10   62.49    4.60
   7  -6 -10   70.69    5.80
  -7   6 -10   76.59    5.90
   0   7 -10  258.97   17.60
   0  -7  10  254.37   14.00
   0  -7  10  250.77   13.30
   0  -7  10  243.88   13.20
   0   7 -10  269.27   15.10
   0   7  10  269.87   14.20
   1  -7  10  201.58   11.40
   1   7 -10  159.28   15.70
  -1   7  10  199.68   11.60
   1   7 -10  199.48   14.80
   1  -7  10  200.08   11.50
  -1  -7  10  191.88   11.00
   1   7  10  204.18   11.40
  -1   7 -10  202.28   14.80
  -1  -7  10  186.48   11.40
  -1   7 -10  185.28   12.60
   2   7 -10  114.79   12.20
   2   7 -10  127.29   11.40
  -2   7  10  142.99    9.20
   2  -7  10  129.09    8.80
   2  -7  10  131.39    8.60
  -2   7 -10  133.19   10.30
  -2  -7  10  163.98   23.10
  -2  -7  10  129.49    8.60
  -2  -7  10  129.39    8.50
   3  -7  10 1072.39   44.70
   3  -7  10 1009.40   42.70
   3   7 -10  997.10   57.09
  -3  -7  10  841.72   45.60
  -3   7 -10 1046.40   46.30
   4  -7  10  100.49    7.30
   4  -7  10   87.59    6.00
  -4   7  10   89.79    6.80
   4   7 -10   92.39    8.70
  -4  -7  10   88.69    6.50
  -4  -7  10   91.19    6.60
  -4   7 -10   83.89    8.10
   5  -7  10   19.80    3.30
   5   7 -10   23.60    4.20
  -5   7  10   18.40    3.00
   5  -7 -10   17.90    3.10
  -5  -7  10   16.90    2.60
  -5   7 -10   20.50    3.80
  -5  -7  10   17.60    2.70
   6   7 -10  179.58   11.10
   6  -7  10  187.58   10.40
  -6   7  10  158.78    9.30
  -6  -7  10  177.58    9.60
  -6  -7  10  201.28   10.80
  -6   7 -10  186.18   10.90
   6  -7 -10  193.18   11.40
   7   7 -10    6.60    2.10
   7  -7  10    6.90    1.90
  -7  -7  10    9.00    1.70
  -7   7 -10   12.00    3.10
   0   8  10  309.77   15.80
   0  -8  10  307.17   16.00
   0  -8  10  307.27   15.20
   0   8 -10  321.17   19.50
   0   8 -10  293.37   16.20
  -1   8  10   76.69    6.30
   1  -8  10   85.59    8.50
   1  -8  10   71.19    5.90
   1   8 -10   76.89    8.40
  -1  -8  10   68.89    5.60
  -1   8 -10   73.19    8.00
  -1  -8  10   70.99    6.10
  -1   8 -10   86.09    7.50
   1   8  10   71.49    5.70
   2  -8  10   35.70    3.80
  -2   8  10   35.60    4.20
   2   8 -10   31.10    5.20
   2  -8  10   33.40    4.30
  -2  -8  10   38.00    4.10
  -2   8 -10   40.90    5.40
  -2   8 -10   33.20    5.50
  -2  -8  10   30.50    3.60
   3  -8  10  129.69    8.20
   3   8 -10  122.19   10.30
  -3   8  10  128.19    8.40
   3  -8  10  124.99    7.70
  -3   8 -10  128.89    9.30
  -3   8 -10  129.69   10.00
  -3  -8  10  114.09    7.70
  -3  -8  10  122.49    7.80
   4  -8  10   24.00    5.10
   4   8 -10   20.60    4.00
  -4   8  10   21.20    3.20
   4  -8  10   17.40    2.60
  -4  -8  10   18.40    2.60
  -4   8 -10   14.10    3.20
  -4  -8  10   23.10    3.00
  -4   8 -10   17.70    3.70
   5   8 -10  113.89    8.30
   5  -8  10  110.59    6.80
  -5   8  10  106.39    6.70
  -5  -8  10  109.19    6.60
  -5   8 -10   89.59    8.40
  -5   8 -10  104.59    7.40
  -5  -8  10  105.39    6.30
  -6   8  10   35.60    3.20
   6  -8  10   39.30    3.10
   6   8 -10   31.70    3.70
  -6  -8  10   39.80    3.10
  -6   8 -10   38.40    4.40
   0   9  10    8.90    2.10
   0  -9  10   11.00    2.20
   0   9 -10   13.20    2.90
   0  -9  10   15.00    2.60
   0   9 -10   16.80    4.00
   1   9 -10   10.60    2.80
   1  -9  10    5.10    1.70
  -1   9  10    6.30    2.00
  -1  -9  10    4.10    1.40
  -1   9 -10    5.30    2.20
  -1   9 -10    4.50    3.90
  -1  -9  10    5.20    1.60
   2   9 -10   39.40    5.30
  -2   9  10   33.70    4.00
   2  -9  10   33.90    3.70
  -2   9 -10   40.90    5.60
  -2   9 -10   38.60    4.70
  -2  -9  10   37.00    3.80
  -2  -9  10   35.30    3.60
   3   9 -10    2.50    2.00
   3  -9  10    2.50    1.30
  -3   9  10    2.00    1.30
  -3  -9  10    3.50    1.90
  -3   9 -10    4.40    2.20
  -3   9 -10    3.50    1.90
   4  -9  10   35.10    3.10
  -4   9  10   30.60    3.20
   4   9 -10   32.50    4.20
  -4  -9  10   31.90    3.00
  -4  -9  10   30.20    2.90
  -4   9 -10   24.70    5.00
  -5   9  10   47.70    3.60
   5   9 -10   62.59    4.90
  -5   9 -10   54.49    4.50
  -5  -9  10   48.30    3.30
  -5  -9  10   44.20    4.00
   0  10  10   90.19    6.40
   0 -10  10   89.09    5.90
   0 -10  10   84.89    5.80
   0  10 -10   89.19    6.90
   1  10 -10   11.90    2.70
  -1  10  10   17.20    2.90
   1 -10  10   13.60    2.20
  -1  10 -10    9.30    2.40
  -1 -10  10   11.70    2.10
  -1  10 -10    6.80    3.90
  -1 -10  10   15.00    2.40
   2 -10  10   15.60    2.10
  -2  10  10    9.80    2.00
   2  10 -10   16.80    2.90
  -2 -10  10   17.10    2.10
  -2 -10  10   16.70    2.30
  -2  10 -10   12.20    2.40
  -2  10 -10   13.30    2.40
  -3  10  10  124.79    7.00
   3 -10  10  134.69    6.70
  -3 -10  10  130.39    6.80
  -3  10 -10  129.59    7.20
  -3 -10  10  129.49    6.90
   0   0 -11   -0.90    1.40
   0   0  11    1.60    1.70
   0   0  11    5.80    2.60
   0   0  11    1.40    1.30
   1   0 -11  353.26   18.80
  -1   0  11  340.87   17.70
   1   0  11  306.27   16.70
   1   0  11  371.16   16.70
   1   0  11  308.67   16.40
  -1   0  11  384.36   21.50
  -1   0  11  328.77   16.40
  -2   0  11  348.37   17.20
  -2   0  11  344.27   17.40
   2   0  11  377.66   22.90
   2   0  11  395.86   17.90
   2   0  11  365.46   17.50
   2   0 -11  383.66   19.70
  -2   0  11  333.37   17.80
   3   0 -11  108.59    8.90
   3   0  11  101.49   11.30
  -3   0  11   99.79    7.50
  -3   0  11  104.39    9.80
  -3   0  11  102.69    6.90
   3   0  11  100.89    7.90
   3   0  11  116.89    7.70
   3   0  11  113.79    8.40
  -3   0  11  104.99    7.40
  -4   0  11  258.87   13.80
   4   0 -11  254.77   15.50
   4   0  11  264.47   20.00
   4   0  11  250.87   14.30
  -4   0  11  251.67   14.10
  -4   0  11  244.68   12.90
  -4   0  11  230.38   17.20
  -5   0  11  157.78   18.00
   5   0  11  164.18   11.00
   5   0 -11  174.98   12.80
  -5   0  11  175.78   10.50
   5   0  11  133.09   15.80
  -5   0  11  174.48   10.70
  -5   0  11  182.08    9.80
  -6   0  11  184.08   11.00
   6   0  11  156.88   21.30
  -6   0  11  181.78   10.70
   6   0  11  194.38   11.40
  -6   0  11  172.88   10.80
  -6   0  11  158.38   16.50
   6   0 -11  140.59   14.00
   7   0  11   21.00    3.50
  -7   0  11   22.20    3.20
  -7   0  11   21.80    3.90
  -8   0 -11    1.40    1.50
  -8   0  11    2.10    1.40
   8   0  11    2.40    2.00
  -9   0 -11  107.29    6.20
   9   0 -11   92.29    5.40
  -9   0  11   99.19    5.80
   0   1  11  165.08    9.70
   0  -1 -11  184.28   11.70
   0  -1  11  152.38    9.70
   0   1  11  157.08    9.40
   0   1 -11  170.58   11.70
   0  -1  11  164.08   12.40
  -1   1  11   38.60    2.40
   1  -1  11   38.20    4.30
  -1   1  11   30.40    3.80
   1   1 -11   41.30    5.30
  -1   1  11   31.70    4.90
  -1   1  11   36.80    2.40
   1   1  11   45.00    4.20
   1   1  11   40.00    6.50
   1   1  11   41.70    4.50
  -1  -1  11   35.30    3.70
   1  -1 -11   44.40    5.40
  -1  -1  11   39.30    5.30
  -1  -1  11   37.00    4.30
  -1  -1  11   42.00    4.30
   2   1 -11    5.70    2.50
  -2   1  11   11.60    2.30
   2  -1  11    4.70    4.40
  -2   1  11   12.00    3.80
  -2   1  11   10.40    2.80
   2  -1  11    7.70    2.50
  -2   1  11   14.20    2.80
   2   1  11    6.80    2.00
  -2  -1  11    7.90    2.10
   2  -1 -11    5.70    2.50
   2   1  11   14.00    2.70
   2   1  11   10.40    4.10
  -2  -1  11    8.10    4.10
  -2  -1  11   10.10    2.30
   3  -1  11  324.47   22.10
  -3   1  11  349.87   17.40
  -3   1  11  327.47   18.90
  -3   1  11  315.67   16.70
  -3   1  11  320.57   16.20
   3  -1  11  344.27   17.60
   3   1 -11  320.97   20.10
   3   1  11  319.77   17.00
  -3  -1  11  346.37   21.10
   3  -1 -11  363.56   18.70
  -3  -1  11  357.26   17.10
  -3  -1  11  340.47   16.70
   3   1  11  344.27   16.40
  -3  -1  11  318.57   16.10
  -4   1  11   49.80   10.20
   4  -1  11   48.60    5.30
  -4   1  11   44.10    4.80
  -4   1  11   43.90    4.20
   4   1 -11   43.30    6.10
  -4   1  11   46.60    7.50
   4  -1  11   42.80    9.10
   4   1  11   27.20    8.50
  -4  -1  11   48.20    4.20
  -4  -1  11   51.19   10.70
   4   1  11   44.10    5.30
  -4  -1  11   46.60    4.80
   4  -1 -11   40.30    6.00
  -4  -1  11   46.30    6.10
   5  -1  11  226.98   19.90
  -5   1  11  262.07   14.00
  -5   1  11  244.18   13.80
   5  -1  11  251.57   14.50
  -5   1  11  188.88   22.90
  -5   1  11  242.68   12.80
   5   1 -11  280.57   16.60
   5   1  11  212.58   19.70
  -5  -1  11  237.18   13.50
   5  -1 -11  255.37   16.30
   5   1  11  240.58   13.90
  -5  -1  11  240.18   12.60
  -5  -1  11  253.57   13.60
  -6   1  11  185.38   11.80
  -6   1  11  194.38   12.70
   6   1 -11  196.08   17.20
   6  -1  11  203.38   12.60
  -6   1  11  211.38   12.00
  -6   1  11  176.28   16.40
   6   1  11  207.28   13.40
  -6  -1  11  208.58   11.70
  -6  -1  11  209.68   12.00
   6   1  11  188.38   25.40
   7  -1  11  165.98   10.20
  -7   1  11  160.58    9.90
  -7   1 -11  158.28   10.30
  -7  -1  11  160.58    9.60
  -7  -1  11  162.68    9.90
   8  -1  11   68.29    5.00
  -8   1 -11   74.19    5.70
  -8  -1  11   51.49    6.30
  -9  -1 -11  121.69    6.60
  -9   1  11   97.69    5.90
   9  -1 -11  113.39    6.20
  -9  -1  11  105.79    6.10
  -9   1 -11  118.59    6.50
   0  -2  11  184.28   10.30
   0   2 -11  179.48   12.30
   0  -2 -11  186.08   12.30
   0  -2  11  167.98   10.50
   0   2  11  147.69   12.40
   1  -2  11   54.49    5.50
  -1   2  11   63.49    5.90
   1   2 -11   74.79    7.10
  -1   2  11   66.89    5.30
  -1   2 -11   67.99    7.30
  -1  -2  11   72.89    7.80
  -1  -2  11   65.89    5.40
   1   2  11   61.99    5.20
   1   2  11   76.79    8.70
   1   2  11   60.09    5.50
   1  -2 -11   73.29    6.70
  -2   2  11  272.57   14.40
  -2   2  11  276.37   13.60
   2   2 -11  263.17   15.70
   2  -2  11  241.88   14.30
  -2   2  11  257.87   14.70
  -2  -2  11  244.28   13.60
   2   2  11  285.27   19.20
  -2  -2  11  279.07   17.90
   2   2  11  273.97   13.50
   2   2  11  247.68   13.80
   2  -2 -11  266.97   15.10
   3  -2  11  702.83   32.50
   3   2 -11  774.92   34.40
  -3   2  11  720.83   31.80
  -3   2  11  700.33   31.80
  -3   2  11  698.83   31.00
  -3   2  11  724.03   32.20
   3   2 -11  699.03   34.40
  -3   2  11  661.43   37.40
  -3  -2  11  735.83   31.60
  -3   2 -11  607.94   31.40
  -3  -2  11  755.42   37.70
   3   2  11  699.43   38.50
  -3  -2  11  739.23   31.40
   3  -2 -11  718.73   32.80
  -3  -2  11  703.03   30.80
   3   2  11  683.83   31.50
  -4   2  11   86.99    7.40
   4  -2  11   84.89    7.50
  -4   2  11   93.79   11.50
   4   2 -11   87.09    8.60
  -4   2  11   95.59    7.40
   4   2 -11  102.39    9.40
  -4   2  11   94.89    7.50
  -4  -2  11   99.89    6.40
  -4   2 -11   88.99    7.50
  -4  -2  11  107.19   17.00
   4   2  11   82.19    7.50
  -4  -2  11   85.19    6.90
  -4  -2  11   95.69    6.90
   4   2  11  101.79   12.80
   4  -2 -11   90.39    8.70
  -5   2  11  186.58   14.90
  -5   2  11  223.78   12.70
  -5   2  11  218.98   11.60
  -5   2  11  204.78   12.50
   5  -2  11  216.58   13.20
   5   2 -11  228.68   15.20
  -5   2 -11  195.88   12.40
  -5  -2  11  203.48   11.00
   5  -2 -11  192.98   14.70
  -5  -2  11  212.18   12.10
  -5  -2  11  185.58   18.20
  -5  -2  11  231.38   12.10
   5   2  11  163.08   18.00
  -6   2  11   12.60    3.20
  -6   2  11   14.90    3.80
  -6   2  11    2.30    7.00
   6  -2  11   11.90    3.00
  -6   2 -11    7.70    2.90
  -6  -2  11   10.50   12.60
  -6  -2  11   12.90    2.70
  -6  -2  11   11.00    3.70
   7  -2  11   79.09    6.50
  -7   2  11   79.49    6.30
  -7  -2  11   77.59    5.90
  -7  -2  11   77.89    6.00
  -7   2 -11   72.99    6.40
   8  -2  11   19.90    3.00
  -8   2  11   21.60    3.10
   8   2 -11   24.90    3.90
   8  -2 -11   21.30    3.00
  -8   2 -11   20.00    3.20
  -8  -2  11   23.10    2.90
   9  -2 -11   84.89    5.20
   0   3  11  372.46   17.90
   0   3 -11  394.26   20.90
   0  -3  11  368.86   18.40
   0   3  11  309.27   22.80
   0  -3  11  382.56   18.00
  -1  -3 -11  619.34   30.10
   1   3 -11  698.73   31.50
  -1   3  11  624.04   28.30
  -1   3  11  603.04   28.00
   1  -3  11  615.94   28.80
  -1   3  11  613.14   28.70
   1  -3  11  648.34   31.10
  -1   3 -11  663.03   31.90
  -1  -3  11  619.34   28.30
  -1  -3  11  646.44   28.30
   1   3  11  640.34   33.40
   1   3  11  599.14   27.70
  -1  -3  11  606.44   27.70
   2   3 -11  457.25   24.80
  -2   3  11  473.05   22.30
   2  -3  11  459.75   22.70
  -2   3  11  486.25   22.80
  -2   3  11  452.85   21.50
   2   3 -11  477.85   24.50
  -2  -3  11  463.75   21.50
   2   3  11  397.06   33.30
   2   3  11  450.15   21.10
  -2  -3  11  465.25   21.80
  -2  -3  11  466.45   27.30
   2  -3 -11  477.25   22.80
  -3   3  11  722.83   33.50
   3   3 -11  779.72   35.50
   3   3 -11  725.23   35.80
  -3   3  11  725.83   33.20
   3  -3  11  736.83   33.80
  -3   3  11  711.73   32.20
   3   3  11  754.12   40.40
  -3   3 -11  653.73   33.00
   3  -3 -11  810.42   33.80
  -3  -3  11  768.02   39.70
  -3  -3  11  718.83   32.50
  -3  -3  11  715.33   31.90
  -3  -3  11  728.13   32.30
  -4   3  11  315.77   17.00
  -4   3  11  304.47   15.70
  -4   3  11  299.77   16.00
   4  -3  11  309.57   17.40
   4   3 -11  321.17   18.70
   4   3 -11  302.27   18.60
  -4   3  11  316.07   17.10
   4  -3 -11  326.67   23.80
  -4  -3  11  313.97   22.70
  -4   3 -11  283.57   16.70
  -4  -3  11  313.27   15.90
  -4  -3  11  328.27   15.40
   4   3  11  322.27   23.70
  -4  -3  11  312.67   16.10
   5  -3  11  165.28   11.10
   5   3 -11  187.98   13.60
  -5   3  11  157.58    9.50
   5   3 -11  140.19   11.30
  -5   3  11  137.19   11.70
  -5   3  11  160.18   10.70
  -5   3 -11  160.88   10.80
  -5  -3  11  166.08    9.90
   5   3  11  157.98   18.50
  -5  -3  11  155.08   17.20
  -5  -3  11  151.18    8.80
  -5  -3  11  161.88    9.80
   6  -3  11   71.19    6.50
  -6   3  11   71.69    6.60
  -6   3  11   73.89    5.40
  -6  -3  11   89.49   24.70
  -6   3 -11   58.79    6.00
  -6  -3  11   64.39    5.50
  -6  -3  11   66.79    5.70
   7  -3  11  105.39    7.40
  -7   3  11   86.59    6.80
  -7   3  11  103.49    6.10
  -7  -3  11   92.49    6.60
  -7  -3  11   88.69    6.40
  -7   3 -11   99.19    7.50
   8  -3  11    5.00    1.40
  -8   3  11    3.00    1.80
  -8   3 -11    2.70    2.00
   8  -3 -11    6.20    2.00
  -8  -3  11    3.60    1.40
   0   4  11    1.60    1.60
   0   4 -11   -1.00    2.20
   0  -4  11    1.40    1.50
   0  -4 -11    1.40    3.30
   0  -4  11    0.90    1.60
  -1   4  11  159.78   10.00
  -1   4  11  177.18   10.90
   1  -4  11  168.28   10.50
  -1  -4 -11  162.08   11.70
   1  -4  11  170.18   10.10
   1   4 -11  173.48   12.30
  -1  -4  11  175.88    9.90
   1   4  11  165.88    9.80
   1   4  11  166.58   18.40
  -1  -4  11  169.48   10.20
  -1   4 -11  175.28   12.80
  -1  -4  11  184.68   10.30
   2   4 -11   63.09    7.50
  -2   4  11   67.59    5.50
   2   4 -11   58.69    7.00
   2  -4  11   60.29    5.40
   2  -4  11   64.09    6.10
  -2   4  11   74.19    6.30
  -2   4 -11   62.59    7.80
  -2  -4  11   67.39    5.70
  -2  -4  11   60.09    5.40
   2   4  11   68.89    5.70
  -2  -4  11   62.19    9.30
   2   4  11   70.59    9.90
  -2   4 -11   72.39    9.40
   3   4 -11 1031.60   46.20
  -3   4  11 1091.69   44.70
  -3   4  11 1039.90   43.30
   3  -4  11 1028.30   44.80
   3  -4  11  978.40   42.40
   3   4 -11 1024.10   47.30
  -3  -4  11  888.21   56.49
  -3  -4  11 1002.10   43.20
   3   4  11 1031.70   51.79
  -3   4 -11  937.11   45.50
  -3  -4  11 1030.70   43.20
   4   4 -11  189.08   14.30
  -4   4  11  222.08   13.30
  -4   4  11  205.28   11.80
   4   4 -11  214.68   14.60
   4  -4  11  226.58   13.40
  -4  -4  11  203.18   11.10
  -4   4 -11  205.58   13.00
   4   4  11  215.98   19.50
  -4  -4  11  210.98   11.90
  -4  -4  11  191.08   23.40
  -4  -4  11  226.08   12.30
  -5   4  11  471.65   22.00
  -5   4  11  413.26   20.10
   5   4 -11  408.66   22.60
   5  -4  11  442.06   22.10
   5   4 -11  359.06   24.50
   5   4  11  462.15   35.50
  -5  -4  11  425.06   20.30
  -5  -4  11  405.76   30.80
  -5   4 -11  405.36   21.70
  -5  -4  11  420.46   20.40
   6   4 -11  118.99    9.10
  -6   4  11  125.29    8.80
   6  -4  11  115.49    8.70
  -6   4  11  121.69    7.70
  -6   4 -11  110.69    8.70
  -6  -4  11  118.69    7.90
  -6  -4  11  117.69    7.70
  -7   4  11   88.29    6.90
   7  -4  11  101.69    7.20
  -7   4  11  112.19    6.50
  -7  -4  11  101.09    6.50
  -7   4 -11  108.79    7.80
   8  -4  11  335.17   17.00
   8  -4 -11  360.96   17.60
  -8  -4  11  350.86   16.50
  -8   4 -11  350.86   16.60
   0  -5  11  110.89    8.60
   0   5 -11  118.59   11.30
   0  -5  11  107.79    7.40
   1  -5  11  184.68   11.40
   1  -5  11  171.18   11.20
   1   5 -11  148.79   12.30
   1   5 -11  160.28   12.80
  -1   5  11  149.49    9.80
  -1  -5  11  161.38    9.60
   1   5  11  157.48   14.40
  -1  -5  11  200.68   14.40
   1   5  11  160.48   10.00
  -1   5 -11  169.38   16.20
  -1  -5  11  181.08   10.40
   2   5 -11  148.19   11.30
   2   5 -11  123.09   11.00
  -2   5  11  126.99    8.70
   2  -5  11  128.49    8.50
   2  -5  11  129.39    9.20
   2   5  11  134.79   11.30
  -2   5 -11  136.09   11.60
  -2  -5  11  130.59    8.40
  -2  -5  11  131.79   15.30
   2   5  11  133.59   14.10
  -2  -5  11  132.99    8.70
  -3   5  11  629.64   28.90
   3  -5  11  620.44   28.00
  -3   5  11  677.33   30.50
   3  -5  11  644.74   30.10
   3   5 -11  627.64   32.70
   3   5 -11  647.94   31.60
  -3   5 -11  587.54   32.30
  -3  -5  11  654.13   29.00
   3   5  11  619.74   36.80
  -3   5 -11  620.24   30.40
  -3  -5  11  644.04   28.70
   4   5 -11  385.06   20.90
  -4   5  11  348.97   17.50
   4  -5  11  341.97   18.80
   4   5 -11  361.76   20.80
  -4   5  11  361.36   19.00
  -4  -5  11  342.27   16.40
  -4   5 -11  310.77   21.60
  -4  -5  11  361.96   17.70
   4   5  11  339.07   26.20
  -4   5 -11  324.17   18.80
  -4  -5  11  334.57   27.20
  -4  -5  11  354.96   17.40
   5   5 -11    1.20    1.90
  -5   5  11    2.90    1.50
  -5   5  11    2.00    1.90
   5  -5  11    2.00    1.40
  -5   5 -11    6.50    2.80
  -5  -5  11    2.40    1.70
  -5  -5  11    1.00    1.40
  -6   5  11  129.29    8.00
   6  -5  11  140.59    9.30
   6   5 -11  134.69    9.50
  -6   5  11  128.29    9.10
  -6  -5  11  127.29    8.00
  -6   5 -11  138.79    9.60
  -6  -5  11  138.09    8.20
   7  -5  11   20.70    2.90
  -7   5  11   18.80    3.10
   7   5 -11   13.60    3.70
  -7  -5  11   19.30    2.50
   7  -5 -11   19.00    2.80
  -7   5 -11   16.80    3.20
  -7  -5  11   18.30    2.60
   8  -5  11    5.50    1.60
  -8  -5  11   11.00    1.80
  -8   5 -11    7.60    1.80
   8  -5 -11    7.00    1.60
   0  -6  11   30.70    4.20
   0   6 -11   35.70    6.00
   0   6 -11   43.00    7.60
   0  -6  11   44.10    4.50
   0  -6  11   44.10    4.30
   0   6  11   36.70    4.20
   1   6 -11  300.97   19.10
   1  -6  11  288.27   15.30
   1  -6  11  290.67   15.60
  -1   6  11  284.47   15.40
   1   6 -11  293.67   18.00
  -1   6 -11  277.47   17.80
  -1  -6  11  283.37   14.80
   1   6  11  303.77   15.10
  -1   6 -11  315.27   22.80
  -1  -6  11  298.27   15.60
   2   6 -11  100.09    9.80
   2  -6  11   82.59    7.10
   2  -6  11   89.59    6.70
  -2   6  11   86.49    6.90
   2   6 -11   68.79    9.20
  -2  -6  11   91.79    7.00
  -2  -6  11   90.29    6.60
  -2   6 -11  103.89    8.60
   2   6  11   89.99   14.90
  -2  -6  11   89.29   14.30
  -2   6 -11   80.89   10.20
   3   6 -11    5.90    3.00
   3   6 -11    4.50    4.60
   3  -6  11    2.30    1.60
   3  -6  11    3.60    1.70
  -3  -6  11    1.60    1.50
  -3   6 -11    7.10    3.30
  -3   6 -11   17.60    8.10
  -3  -6  11   21.70   12.60
   4  -6  11   60.39    6.10
   4   6 -11   66.99    7.50
  -4   6  11   61.29    5.50
  -4   6 -11   62.09    6.50
  -4  -6  11   67.49    4.90
  -4  -6  11   59.69    5.30
  -4  -6  11   61.89    5.30
   5   6 -11   90.09    8.20
   5  -6  11  103.09    7.70
  -5   6  11   99.19    6.90
  -5  -6  11   96.89    6.70
  -5  -6  11   96.09    6.70
  -5   6 -11   94.29    8.00
  -6   6  11  102.89    7.10
   6   6 -11  103.69    7.70
   6  -6  11  108.29    7.40
  -6  -6  11   96.69    6.40
  -6   6 -11  106.99    7.70
   6  -6 -11  100.89    6.60
  -6  -6  11  103.79    6.40
  -7   6  11   54.49    3.60
   7  -6  11   63.49    4.80
   7   6 -11   52.49    6.30
   7  -6 -11   63.49    5.20
  -7  -6  11   55.19    4.10
  -7   6 -11   65.29    4.90
   0   7 -11   72.69    8.20
   0   7  11   63.89    5.70
   0  -7  11   67.39    5.40
   0  -7  11   71.39    6.00
  -1   7  11  314.27   16.40
   1  -7  11  312.97   16.10
   1  -7  11  310.97   17.60
   1   7 -11  322.47   20.10
  -1  -7  11  306.97   16.10
   1   7  11  306.37   17.40
  -1  -7  11  293.77   15.50
  -1   7 -11  325.77   19.90
   2  -7  11  157.88   10.00
   2  -7  11  156.28    9.60
  -2  -7  11  157.18    9.30
  -2   7 -11  134.49   10.30
  -2  -7  11   98.99   21.40
   3   7 -11    8.90    3.00
   3  -7  11    8.80    2.20
  -3   7  11    7.80    2.20
   3  -7  11    9.60    2.20
  -3  -7  11    8.70    2.20
  -3  -7  11   12.60    2.70
  -3   7 -11    5.80    2.80
  -4   7  11   15.30    2.90
   4   7 -11   25.50    4.40
   4  -7  11   11.90    3.00
   4  -7  11   22.00    3.20
  -4  -7  11   17.70    2.70
  -4   7 -11   20.80    4.00
  -4  -7  11   21.70    2.90
   5   7 -11   53.49    5.70
   5  -7  11   57.79    5.30
  -5   7  11   49.00    4.40
  -5  -7  11   52.09    4.40
  -5   7 -11   52.49    5.20
  -5  -7  11   57.29    5.30
   5  -7 -11   42.70    5.30
  -5   7 -11   59.39    6.20
   6  -7  11    2.80    1.40
  -6   7  11    2.40    1.50
  -6   7 -11    2.40    2.10
  -6  -7  11    2.40    1.20
  -6  -7  11    3.90    2.20
   0  -8  11  137.39    8.60
   0  -8  11  126.29    7.60
   0   8  11  125.29    8.30
   0   8 -11  125.49   10.90
  -1   8  11   90.49    6.80
   1   8 -11   94.29    9.10
   1  -8  11   95.19    6.70
  -1  -8  11   87.79    6.40
  -1   8 -11   83.89    7.40
  -1   8 -11   95.29    8.90
   1   8  11   77.19    6.00
  -1  -8  11   87.99    6.20
   2  -8  11  270.77   13.10
   2   8 -11  263.17   16.70
   2  -8  11  251.77   13.30
  -2   8  11  243.88   13.60
  -2  -8  11  254.87   13.60
  -2  -8  11  255.07   13.00
  -2   8 -11  258.47   14.40
  -2   8 -11  248.68   16.00
  -3   8  11   54.79    5.00
   3   8 -11   51.69    6.20
   3  -8  11   50.89    4.30
   3  -8  11   64.59    7.00
  -3   8 -11   43.30    8.00
  -3  -8  11   53.49    4.50
  -3  -8  11   50.99    4.10
  -3   8 -11   59.19    6.10
  -3  -8  11   55.19    4.70
   4  -8  11  109.29    7.20
  -4   8  11  117.09    7.60
   4  -8  11  117.59    7.40
   4   8 -11  130.19    9.50
  -4  -8  11  148.29    8.90
  -4   8 -11  116.89    8.20
  -4   8 -11  121.39    8.30
  -5   8  11   39.20    3.60
   5  -8  11   35.60    3.50
   5   8 -11   45.70    4.60
  -5  -8  11   35.00    3.10
  -5   8 -11   34.80    3.90
  -5  -8  11   42.40    3.40
   6  -8  11  112.39    6.40
   6   8 -11  101.99    6.30
  -6   8  11   89.19    5.10
  -6  -8  11  102.19    5.40
   0   9  11  112.49    7.10
   0  -9  11  121.69    7.50
   0   9 -11  114.39    9.30
   0  -9  11  116.09    6.70
   1   9 -11    6.20    2.70
   1  -9  11    5.00    1.50
  -1  -9  11    7.00    1.60
  -1  -9  11    6.70    2.00
  -1   9 -11    5.20    2.40
   2  -9  11    9.50    1.90
   2   9 -11   11.70    2.90
  -2  -9  11    5.00    1.40
  -2  -9  11    8.10    1.70
  -2   9 -11   10.40    2.80
  -2   9 -11    8.70    2.40
   3  -9  11   80.59    6.80
  -3   9  11   83.29    6.10
   3   9 -11  103.29    7.80
  -3   9 -11   97.09    6.90
  -3  -9  11  100.39    6.00
  -3  -9  11   99.39    5.90
   4   9 -11    2.20    1.40
  -4   9  11    1.50    1.00
  -4  -9  11    1.40    1.00
  -4  -9  11    2.60    1.10
  -4   9 -11    1.60    2.00
   0 -10  11   95.19    6.20
   0  10 -11  119.69    8.00
  -1  10  11   24.10    2.80
   1  10 -11   18.20    3.60
   1 -10  11   27.60    3.00
  -1 -10  11   25.70    2.70
  -1  10 -11   30.70    4.50
  -1 -10  11   21.70    2.40
  -2  10  11   11.90    2.30
   2  10 -11   17.40    2.90
  -2 -10  11   14.30    1.90
  -2  10 -11   11.10    2.70
  -2 -10  11   17.60    2.20
  -3  10  11    8.20    1.40
  -3 -10  11    9.70    1.50
   0   0  12  156.88    9.70
   0   0  12  164.78    9.20
   0   0  12  162.78   10.10
   0   0  12  165.08   10.10
   0   0  12  161.78    9.70
   0   0 -12  177.88   12.30
  -1   0 -12  448.16   23.70
   1   0  12  417.46   20.10
  -1   0  12  413.36   20.00
   1   0 -12  467.25   23.20
   1   0  12  411.56   20.40
  -1   0  12  401.96   20.30
  -1   0  12  438.46   21.20
  -1   0  12  404.46   20.70
   2   0  12   83.29    6.30
   2   0 -12   90.39    8.20
  -2   0  12   78.89    7.90
  -2   0  12   75.29    6.30
   2   0  12   78.79    6.60
  -2   0  12   78.69    5.90
  -2   0  12   87.19    6.60
   3   0 -12   97.69    8.70
  -3   0  12   99.19    7.10
  -3   0  12   91.99    7.00
   3   0  12   91.89   11.50
   3   0  12   88.99    7.20
   3   0  12   90.79    6.70
  -3   0  12   85.39    6.40
  -3   0  12   92.69    9.40
  -4   0  12    9.50    2.10
  -4   0  12    5.40    4.70
   4   0  12   -0.10    4.60
   4   0  12    3.70    2.00
  -4   0  12    5.60    1.90
  -4   0  12    9.60    2.80
   4   0 -12    4.40    3.10
  -5   0  12   72.39    6.30
  -5   0  12   57.49    5.10
   5   0 -12   60.29    8.70
  -5   0  12   56.49    9.40
   5   0  12   61.69    6.10
  -5   0  12   74.69    6.10
  -6   0  12  192.08   10.20
  -6   0  12  183.18   11.50
  -6   0  12  193.28   11.20
   6   0  12  193.08   11.60
  -7   0 -12   79.29    6.30
   7   0  12   76.09    6.00
  -7   0  12   79.29    6.10
  -7   0  12   72.59    5.90
  -8   0 -12   86.39    5.90
  -8   0  12   70.69    5.30
   0   1  12   75.19    7.00
   0  -1  12  100.69    8.20
   0   1  12   78.09    6.20
   0  -1  12   82.29    6.60
   0  -1 -12  102.19    8.60
   0   1  12   92.39    6.70
   0   1 -12  102.59    8.90
  -1   1  12  389.96   19.20
   1  -1  12  390.96   19.80
   1  -1  12  392.06   19.90
   1   1 -12  460.55   22.80
  -1   1  12  374.46   19.50
  -1  -1 -12  406.46   22.50
  -1  -1  12  402.56   19.60
  -1  -1  12  404.76   19.60
   1   1  12  397.86   19.30
   1   1  12  394.56   19.50
  -1  -1  12  415.26   19.50
   1  -1 -12  436.86   22.10
  -1  -1  12  416.56   22.00
  -1   1 -12  429.36   23.20
   2  -1  12   79.09    6.80
  -2   1  12   95.29    6.70
   2   1 -12  107.29    9.70
  -2   1  12   87.19    7.10
  -2   1  12   92.69    6.40
  -2   1  12   85.99    7.10
   2   1  12   98.29    6.80
  -2  -1  12   98.69    9.60
   2   1  12  103.49   11.30
   2  -1 -12   92.99    8.50
  -2  -1  12   96.09    6.60
  -2  -1  12   87.99    6.90
  -2  -1  12   94.99    7.00
   2   1  12   85.69    7.00
  -3   1  12   90.09    6.50
  -3   1  12   83.89    7.20
   3  -1  12   95.59    7.30
   3   1 -12   77.89    8.10
  -3   1  12   91.89    8.20
  -3   1  12   83.99    6.90
   3   1  12   77.69    6.70
  -3  -1  12   83.49    6.20
  -3  -1  12   85.69    9.60
   3  -1 -12   84.89    8.20
  -3  -1  12   95.89    6.80
   3   1  12   90.09    6.50
   3   1  12   92.49   11.40
  -3  -1  12   93.69    6.90
  -4   1  12   52.89    4.70
  -4   1  12   52.39    5.40
   4  -1  12   55.59    5.70
   4   1 -12   55.69    7.20
  -4   1  12   53.79    5.60
   4  -1  12   57.89   10.70
  -4   1  12   48.20    7.70
  -4  -1  12   43.10    8.40
  -4  -1  12   60.49    4.90
  -4   1 -12   50.99    6.20
   4  -1 -12   57.49    7.40
   4   1  12   50.19    5.40
  -4  -1  12   52.49    5.20
  -4  -1  12   54.49    5.40
   4   1  12   58.69   10.10
   5  -1  12  113.39    8.70
  -5   1  12   99.69   11.20
   5   1 -12  102.29   10.80
  -5   1  12  112.29    7.50
  -5   1  12  114.59    8.30
  -5   1  12  118.39    8.30
   5  -1  12   96.79   15.20
  -5   1 -12  110.49    8.30
   5   1  12   89.29   14.80
  -5  -1  12  123.09    8.30
  -5  -1  12  123.19    7.40
  -5  -1  12  111.69   13.20
   5  -1 -12  105.79   12.00
   5   1  12  106.29    8.20
  -5  -1  12  115.39    8.00
  -6   1  12   48.00    5.10
  -6   1  12   46.60    4.40
   6  -1  12   50.09    5.20
  -6   1  12   50.89    5.20
  -6   1 -12   42.60    5.00
  -6  -1  12   46.20    4.90
  -6  -1  12   45.50    4.40
   6   1  12   49.90    5.00
  -6  -1  12   37.30   11.00
  -6  -1  12   47.40    4.70
   7  -1  12   20.80    3.20
  -7   1  12   22.00    3.40
  -7   1 -12   30.00    3.70
  -7  -1  12   25.60    3.50
  -7  -1  12   17.20    3.10
  -8   1  12    5.70    1.80
   8  -1  12    2.80    1.60
  -8  -1 -12    3.50    1.60
   0   2  12    4.90    3.10
   0   2 -12    3.90    2.30
   0  -2  12    4.40    1.80
   0  -2 -12    3.80    2.80
   0  -2  12    4.90    2.00
   1   2 -12  301.57   23.30
   1  -2  12  331.67   16.90
  -1   2  12  350.66   16.90
  -1   2  12  321.37   16.90
  -1   2  12  337.17   17.30
   1  -2  12  336.37   17.40
  -1  -2 -12  346.37   19.60
  -1  -2  12  349.37   16.50
  -1  -2  12  368.96   20.80
   1   2  12  320.97   16.50
  -1  -2  12  326.57   16.80
   1  -2 -12  347.17   18.90
   1   2  12  344.07   16.80
  -1  -2  12  340.47   17.00
   2   2 -12  234.18   15.20
  -2   2  12  239.78   13.20
   2   2 -12  225.28   15.00
  -2   2  12  242.08   12.70
  -2   2  12  225.98   13.30
   2  -2  12  240.28   13.50
   2   2  12  254.47   18.50
  -2  -2  12  231.38   12.50
  -2  -2  12  220.48   12.70
   2   2  12  231.78   12.80
   2  -2 -12  242.28   14.50
  -2  -2  12  241.28   16.90
  -2  -2  12  222.58   12.40
   2   2  12  236.48   12.50
  -3   2  12   45.70    5.10
   3   2 -12   37.40    6.30
   3  -2  12   41.00    6.50
   3   2 -12   57.79    7.70
  -3   2  12   40.20    6.20
   3  -2 -12   46.90    6.70
  -3  -2  12   47.20    4.70
  -3  -2  12   47.30    4.80
  -3  -2  12   63.49    6.80
   3   2  12   38.20    4.70
   3   2  12   51.19   11.10
   3   2  12   45.70    5.30
  -4   2  12  232.68   12.40
  -4   2  12  240.78   13.50
   4  -2  12  241.98   13.90
   4   2 -12  240.28   15.50
  -4   2  12  239.08   13.40
   4   2 -12  208.68   14.60
  -4  -2  12  224.78   23.10
  -4  -2  12  228.58   12.50
   4   2  12  206.38   19.10
  -4   2 -12  208.28   13.10
  -4  -2  12  222.18   11.90
   4   2  12  223.18   12.90
  -4  -2  12  222.08   12.80
   4  -2 -12  207.58   14.60
  -5   2  12  120.59    8.90
   5  -2  12  120.39    8.90
  -5   2  12  121.09    7.80
   5   2 -12  113.09   10.90
  -5   2  12  120.29    8.70
  -5   2  12  101.59   10.10
  -5  -2  12  132.89    8.70
  -5   2 -12  114.29    8.90
   5   2  12  108.99   15.60
   5  -2 -12   93.99   13.40
  -5  -2  12  122.99    8.20
  -5  -2  12  117.39    7.40
  -5  -2  12  114.89   14.30
  -6   2  12  277.77   13.90
  -6   2  12  274.37   15.10
   6  -2  12  299.17   15.70
  -6   2 -12  276.37   15.40
  -6  -2  12  265.07   14.70
  -6  -2  12  279.67   14.60
   7  -2  12  258.67   14.00
  -7   2  12  261.17   13.90
  -7  -2  12  248.58   13.20
  -7   2 -12  279.67   14.20
  -7  -2  12  261.57   13.40
  -8  -2 -12   52.79    4.60
   8  -2  12   57.79    4.20
  -8   2  12   50.89    4.20
   8   2 -12   50.59    3.70
   8  -2 -12   57.39    4.60
  -8   2 -12   56.99    5.30
  -8  -2  12   49.20    4.00
   0  -3 -12   67.19    7.10
   0   3 -12   60.59    7.30
   0   3  12   53.79    5.10
   0  -3  12   59.19    5.30
   0  -3  12   52.59    5.10
  -1   3  12   24.90    4.00
   1  -3  12   18.30    3.40
  -1  -3 -12   14.20    4.40
  -1   3  12   16.90    4.00
   1   3 -12   20.10    4.40
  -1   3  12   19.90    3.20
   1  -3  12   18.50    3.20
  -1  -3  12   25.00    3.50
  -1  -3  12   27.30    4.20
   1  -3 -12   21.90    4.50
  -1   3 -12   23.90    5.60
  -1  -3  12   21.90    3.20
   1   3  12   23.70    3.40
   2  -3  12   98.09    8.70
  -2   3  12  129.49    8.60
  -2   3  12  123.39    9.70
   2   3 -12  114.89   10.20
   2   3 -12  112.09   10.00
   2  -3  12  127.79    8.20
  -2   3  12  105.79    8.50
   2   3  12  108.59   12.30
  -2  -3  12  115.59    8.40
  -2   3 -12  117.59   10.90
   2   3  12  117.59    7.70
  -2  -3  12  121.39    7.80
  -2  -3  12  126.69   12.80
   2  -3 -12  108.09    9.30
  -3   3  12  332.97   17.10
   3  -3  12  353.96   18.60
  -3   3  12  358.96   18.30
   3   3 -12  349.57   20.20
   3   3 -12  330.77   20.00
  -3   3  12  339.47   18.40
   3  -3 -12  327.27   19.00
   3   3  12  336.97   24.10
  -3   3 -12  331.87   18.20
  -3  -3  12  352.16   23.40
  -3  -3  12  343.57   16.90
  -3  -3  12  352.66   17.50
  -3  -3  12  364.66   17.40
   4  -3  12  701.43   32.20
   4   3 -12  667.13   33.60
  -4   3  12  711.03   31.80
  -4   3  12  709.13   32.10
   4   3 -12  660.63   33.40
  -4   3  12  689.23   30.50
  -4  -3  12  676.23   29.80
  -4  -3  12  709.13   30.60
   4   3  12  665.83   39.70
  -4  -3  12  675.63   30.80
  -4  -3  12  669.83   38.30
  -4   3 -12  638.54   31.40
  -5   3  12   66.89    5.60
  -5   3  12   73.79    6.90
   5  -3  12   71.89    6.70
   5   3 -12   77.19   11.70
  -5  -3  12   77.79    6.30
  -5   3 -12   62.29    7.00
  -5  -3  12   72.19    6.00
  -5  -3  12   68.89   13.00
  -6   3  12   28.50    3.40
   6  -3  12   31.70    4.20
  -6   3  12   28.20    4.00
  -6  -3  12   30.20    3.80
  -6   3 -12   20.70    4.00
  -6  -3  12   27.90    3.40
   7  -3  12  193.38   11.30
  -7   3  12  201.18   11.30
  -7   3  12  201.98   10.10
  -7  -3  12  204.88   10.80
  -7  -3  12  182.48   10.50
  -7   3 -12  222.98   13.00
   8  -3  12   32.30    3.00
  -8   3  12   28.40    4.30
  -8  -3  12   26.10    3.30
   0   4 -12  446.76   29.50
   0  -4  12  478.55   26.70
   0   4  12  496.95   23.60
   0  -4  12  521.45   23.50
   1   4 -12   20.90    5.10
  -1  -4 -12    5.70    6.00
   1  -4  12   20.60    3.50
  -1   4  12   18.20    3.20
   1  -4  12   14.60    2.60
  -1  -4  12   17.20    2.80
  -1  -4  12   14.20    3.00
  -1   4 -12   26.20    6.20
   1   4  12   16.30    3.10
  -2   4  12   21.70    3.30
  -2   4  12   18.20    3.50
   2   4 -12   21.30    4.80
   2   4 -12   23.30    4.50
  -2  -4 -12   15.30    5.70
  -2   4 -12   32.40    6.40
  -2  -4  12   16.60    3.10
  -2  -4  12   22.90    8.00
  -2  -4  12   28.50    3.60
   2   4  12   20.00    6.40
   3  -4  12  317.57   17.60
   3   4 -12  320.37   19.60
  -3   4  12  334.47   17.50
   3   4 -12  337.97   19.70
  -3   4  12  321.57   16.50
  -3   4 -12  310.27   17.60
  -3  -4  12  321.57   16.30
  -3  -4  12  330.37   16.10
  -3   4 -12  306.27   20.30
   3   4  12  318.27   23.70
  -3  -4  12  324.07   16.60
   4   4 -12  134.09   11.30
   4   4 -12  137.09   11.80
   4  -4  12  154.98   10.30
  -4   4  12  138.79    9.00
  -4   4  12  150.18   10.30
  -4  -4  12  125.29   15.60
  -4  -4  12  141.99    8.30
   4   4  12  127.09   17.00
  -4   4 -12  144.79   10.40
  -4  -4  12  151.38    9.10
  -4  -4  12  139.89    9.20
   5   4 -12   41.00    5.80
   5  -4  12   48.90    5.30
  -5   4  12   54.29    5.70
  -5   4  12   53.49    4.90
  -5  -4  12   50.79    4.60
  -5  -4  12   44.10    6.20
  -5  -4  12   38.30   18.40
  -5  -4  12   44.40    4.60
  -5   4 -12   44.50    5.40
   6   4 -12   29.20    5.90
  -6   4  12   36.90    3.70
  -6   4  12   33.10    4.10
   6  -4  12   35.00    4.30
  -6   4 -12   41.60    4.70
  -6  -4  12   36.30    3.80
  -6  -4  12   39.30    4.00
  -7   4  12   12.30    2.90
   7  -4  12   15.80    2.60
  -7   4  12   10.10    2.70
  -7  -4  12    9.30    2.10
  -7   4 -12   15.10    2.90
  -7  -4  12   13.10    2.20
   8  -4  12  152.58    8.10
  -8  -4  12  117.79    7.30
   8  -4 -12  140.79    8.30
  -8   4 -12  126.69    7.20
   0  -5  12   85.09    6.40
   0  -5  12   75.59    6.40
   0   5  12   81.09    6.50
   0   5 -12   78.99    8.80
  -1   5  12  416.16   20.30
   1   5 -12  409.36   23.20
   1  -5  12  412.66   20.70
   1   5 -12  444.16   24.60
   1  -5  12  409.56   20.00
  -1  -5  12  429.06   20.40
  -1  -5  12  396.66   19.30
  -1   5 -12  385.46   23.30
   1   5  12  418.96   19.90
   2  -5  12   59.39    5.40
   2   5 -12   60.49    7.70
   2   5 -12   65.09    8.20
  -2   5  12   65.09    5.70
   2  -5  12   70.29    6.20
  -2   5 -12   59.99    8.50
   2   5  12   61.89    5.50
  -2  -5  12   59.09    5.20
   2   5  12   70.69   11.70
  -2  -5  12   55.39   11.50
  -2  -5  12   70.99    5.80
   3  -5  12   16.80    3.00
   3   5 -12   22.70    5.50
  -3   5  12   17.50    3.90
   3  -5  12   18.70    3.40
  -3   5  12   19.20    3.40
  -3  -5  12   24.30   10.00
  -3   5 -12   19.20    3.80
  -3  -5  12   20.30    3.00
  -3  -5  12   18.10    3.00
   3   5  12   15.00    9.60
  -3  -5  12   22.30    3.30
  -3   5 -12   27.50    6.90
  -4   5  12   62.39    7.00
   4   5 -12   53.69    7.00
   4  -5  12   50.69    6.50
  -4   5 -12   65.39    6.90
  -4  -5  12   86.09   22.40
  -4  -5  12   54.79    4.50
  -4  -5  12   60.69    5.80
  -4  -5  12   54.09    7.70
  -5   5  12   65.09    5.30
  -5   5  12   70.19    6.60
   5   5 -12   62.49    6.60
  -5  -5  12   62.89    5.20
  -5   5 -12   56.79    6.20
  -5  -5  12   63.99    5.50
   6  -5  12   20.10    3.00
   6   5 -12   22.60    4.20
  -6   5  12   20.30    4.10
  -6   5  12   14.30    3.20
  -6   5 -12   25.80    4.50
  -6  -5  12   15.50    2.60
  -6  -5  12   17.90    2.60
   7  -5  12    8.50    1.90
  -7   5  12    4.90    1.60
   7  -5 -12    4.80    2.00
  -7  -5  12    5.40    1.50
  -7   5 -12    7.60    2.40
  -7  -5  12    8.90    1.80
   0   6 -12  133.79   11.50
   0  -6  12  109.49    7.70
   0  -6  12  111.19    7.80
   0   6  12  106.09    7.80
   1  -6  12  125.79    8.50
   1  -6  12  124.39    8.40
   1   6 -12  117.89   10.90
  -1   6  12  125.29    8.60
   1   6 -12  107.19   11.70
  -1   6 -12  110.49   12.20
  -1  -6  12  117.49    8.30
  -1  -6  12  120.99    7.80
   1   6  12  146.59    8.40
   2  -6  12   26.10    3.70
  -2   6  12   31.40    4.00
   2   6 -12   30.00    5.50
   2   6 -12   22.70    8.30
   2  -6  12   36.50    4.40
  -2  -6  12   29.30    3.80
  -2  -6  12   38.30   12.10
  -2  -6  12   32.10    3.80
   3  -6  12  170.38    9.60
   3  -6  12  171.58   11.00
   3   6 -12  177.58   13.30
  -3   6  12  169.08   10.70
  -3  -6  12  179.48   10.10
  -3  -6  12  168.88    9.70
  -3   6 -12  183.28   11.60
   4   6 -12  140.89   10.90
  -4   6  12  119.99    8.40
   4  -6  12  141.39    9.40
  -4   6 -12  147.09   10.20
  -4  -6  12  132.79    7.60
  -4  -6  12  142.29    8.70
  -4  -6  12  131.09    8.30
   5  -6  12  245.68   13.20
   5   6 -12  229.08   13.90
  -5   6  12  232.98   12.20
  -5   6 -12  210.48   16.70
  -5  -6  12  229.48   11.90
  -5  -6  12  241.08   12.20
   5  -6 -12  224.98   12.80
   6  -6  12   35.50    3.80
   6   6 -12   38.80    5.90
  -6   6  12   34.40    3.30
   6  -6 -12   29.50    3.70
  -6  -6  12   37.60    3.40
  -6  -6  12   34.90    3.30
  -6   6 -12   38.20    5.00
   7  -6  12   21.10    2.70
  -7   6 -12   18.20    3.00
   7  -6 -12   15.80    2.80
  -7  -6  12   24.90    2.50
   0  -7  12  219.28   12.40
   0   7  12  229.88   12.60
   0   7 -12  226.78   16.00
   1   7 -12   13.30    3.90
   1  -7  12    5.70    1.80
   1  -7  12   11.70    2.50
  -1   7  12    6.40    2.10
  -1  -7  12   14.20    2.90
   1   7  12    5.90    1.90
  -1  -7  12    9.00    2.20
  -1   7 -12    7.90    3.00
   2  -7  12   55.79    5.00
   2  -7  12   67.09    5.70
   2   7 -12   71.59    7.90
  -2   7  12   70.69    5.90
  -2  -7  12   63.59    5.40
  -2  -7  12   62.39    5.10
  -2   7 -12   50.19    6.80
  -2   7 -12   67.99    7.60
  -3   7  12   53.49    5.00
   3   7 -12   63.79    7.00
   3  -7  12   57.19    5.20
   3  -7  12   56.09    4.50
  -3   7 -12   72.49    6.60
  -3  -7  12   56.19    4.80
  -3  -7  12   56.99    5.10
  -3   7 -12   60.19    6.80
  -3  -7  12   44.70    4.10
   4  -7  12   48.40    4.70
   4   7 -12   51.79    6.00
  -4   7  12   48.80    4.60
  -4  -7  12   50.79    4.30
  -4   7 -12   42.20    5.30
  -4   7 -12   49.40    5.80
  -4  -7  12   52.39    4.40
  -5   7  12   11.10    2.10
   5  -7  12   17.40    2.70
   5   7 -12   11.30    2.90
  -5   7 -12    8.60    4.70
  -5  -7  12   14.60    2.40
  -5  -7  12   14.10    2.20
   6  -7  12    5.30    1.40
   6   7 -12    4.00    1.90
  -6  -7  12    5.50    1.30
  -6   7 -12    8.20    2.20
  -6  -7  12    4.80    1.30
   0   8 -12    9.60    3.30
   0  -8  12   10.90    2.20
   0   8  12   14.80    2.80
  -1   8  12  103.89    7.10
   1  -8  12  106.79    6.90
   1   8 -12   98.59    9.20
  -1  -8  12  103.99    6.60
   1   8  12   97.89    6.60
  -1  -8  12   97.89    6.90
  -1   8 -12   97.39    9.00
   2  -8  12   91.19    5.90
   2  -8  12   86.59    6.00
   2   8 -12   92.59    8.50
  -2   8  12   79.79    6.20
  -2  -8  12   83.99    5.80
  -2   8 -12   87.89    8.20
  -2  -8  12   84.89    6.20
  -3   8  12   48.00    4.50
   3  -8  12   48.70    4.30
   3   8 -12   53.59    5.90
   3  -8  12   52.49    4.00
  -3  -8  12   54.49    5.10
  -3   8 -12   58.49    7.20
  -3  -8  12   60.59    4.90
  -3  -8  12   50.09    4.30
  -3   8 -12   48.00    5.40
  -4   8  12   49.60    4.30
   4   8 -12   54.29    5.40
   4  -8  12   55.39    4.30
  -4  -8  12   54.79    4.00
  -4   8 -12   43.70    6.70
  -4  -8  12   49.00    4.00
  -4   8 -12   44.30    5.20
  -5   8  12   22.80    2.50
   5  -8  12   24.60    2.60
   5   8 -12   27.20    3.30
  -5  -8  12   22.30    2.50
  -5  -8  12   28.90    2.50
   0  -9  12   65.79    5.20
   0   9 -12   62.89    6.20
   0   9  12   55.29    4.90
   1   9 -12   64.09    6.20
  -1   9  12   57.99    4.60
   1  -9  12   55.89    4.40
  -1   9 -12   58.69    5.80
  -1  -9  12   55.09    4.60
  -1  -9  12   48.80    4.50
   2   9 -12   48.80    5.30
  -2   9  12   49.50    4.00
   2  -9  12   47.10    3.70
  -2  -9  12   39.10    3.80
  -2   9 -12   44.80    4.70
  -2  -9  12   41.40    4.20
  -2  -9  12   45.80    3.40
   3   9 -12   94.59    7.10
   3  -9  12   88.99    4.90
  -3   9  12   84.89    5.70
  -3  -9  12   95.99    5.70
  -3  -9  12   89.99    5.30
  -3   9 -12   90.09    6.30
   4   9 -12  236.08   12.80
  -4   9  12  187.88   10.10
  -4  -9  12  191.38    9.20
  -4  -9  12  195.58    9.40
   0  10 -12  190.78   10.40
   0 -10  12  191.18    9.40
   1 -10  12    5.80    1.40
   1  10 -12    5.20    2.00
  -1  10 -12    9.40    2.00
  -1 -10  12    4.70    1.10
  -1 -10  12    4.50    1.00
  -2  10  12   44.90    3.20
   2  10 -12   56.19    4.40
   2 -10  12   51.79    4.00
  -2 -10  12   52.29    3.50
   0   0  13    2.40    2.00
   0   0  13    2.70    1.50
   0   0 -13    9.70    3.70
   1   0 -13  174.48   12.90
  -1   0  13  155.68   10.40
   1   0  13  176.78   10.50
  -1   0 -13  188.08   13.50
  -1   0  13  191.38   10.50
  -1   0  13  170.28    9.70
   1   0  13  168.38   10.40
  -2   0  13    9.60    2.50
  -2   0  13    8.90    2.20
  -2   0  13    4.90    3.40
  -2   0  13    7.20    2.50
  -2   0  13   10.60    7.00
   2   0  13    8.90    2.40
   2   0  13   10.90    2.50
   2   0 -13   11.00    3.90
  -3   0  13  762.42   32.90
   3   0  13  742.03   33.50
   3   0 -13  696.63   35.40
  -3   0  13  751.62   35.60
  -3   0  13  721.83   32.30
  -3   0  13  732.43   33.40
   4   0  13  363.16   26.50
   4   0 -13  396.16   21.90
   4   0  13  372.16   19.40
  -4   0  13  380.66   19.40
  -4   0  13  403.26   19.20
  -4   0  13  381.66   18.30
  -4   0  13  349.27   22.00
  -5   0  13    0.80    1.30
   5   0  13    3.00    2.10
  -5   0  13    2.00    5.90
  -5   0  13    3.90    2.10
  -5   0  13    0.50    1.30
  -6   0  13    1.70    1.80
  -6   0  13   -0.10    1.50
  -6   0 -13    1.50    1.70
   6   0  13   -0.40    1.30
  -6   0  13   -0.50    1.50
   7   0  13  291.07   13.60
  -7   0  13  277.77   14.30
  -7   0 -13  280.37   14.20
  -7   0  13  266.17   14.00
  -8   0  13  211.38   11.00
  -8   0 -13  199.98   10.10
   0   1 -13   59.49    7.40
   0  -1  13   58.29    6.30
   0  -1  13   59.79    5.60
   0   1  13   51.89    5.80
   0   1  13   53.39    5.10
   0  -1 -13   62.89    7.40
   0  -1  13   59.89    5.20
   0  -1  13   64.69    5.50
   1   1 -13  626.04   31.20
  -1   1  13  596.24   28.20
   1  -1  13  599.84   27.50
   1  -1  13  640.54   28.10
   1  -1  13  598.94   32.80
  -1  -1 -13  602.24   31.30
  -1   1  13  616.64   27.80
   1  -1  13  600.14   28.20
   1   1  13  595.04   27.60
   1  -1 -13  659.83   31.00
  -1   1 -13  640.84   32.30
  -1  -1  13  626.34   30.20
  -1  -1  13  583.44   27.80
   1   1  13  572.74   27.70
  -1  -1  13  640.64   27.90
   2  -1  13  233.58   12.10
   2  -1  13  218.28   13.40
  -2   1  13  229.48   12.00
   2  -1  13  183.78   13.30
   2   1 -13  200.18   14.00
   2   1 -13  206.58   15.60
  -2   1  13  188.08   12.20
  -2  -1  13  204.98   11.60
   2   1  13  207.48   12.00
   2  -1 -13  206.88   14.00
  -2  -1  13  212.58   12.90
  -2  -1  13  191.68   14.60
   2   1  13  202.48   11.40
  -3   1  13  343.67   17.20
  -3   1  13  305.17   17.30
   3   1 -13  330.07   19.60
  -3   1  13  331.37   16.50
   3  -1  13  329.77   17.50
   3  -1  13  358.86   16.80
  -3   1  13  318.67   15.90
   3   1  13  305.47   23.10
  -3  -1  13  318.47   16.30
   3   1  13  304.37   16.90
   3  -1 -13  361.36   19.70
  -3  -1  13  325.27   20.70
  -3  -1  13  327.57   17.10
  -3  -1  13  344.67   16.90
   4  -1  13  359.46   19.10
  -4   1  13  399.56   19.40
   4   1 -13  396.06   21.70
  -4   1  13  373.06   18.90
   4  -1  13  381.56   17.40
  -4   1  13  388.76   18.00
  -4  -1  13  354.36   18.20
  -4  -1  13  369.96   18.80
   4  -1 -13  361.56   20.90
  -4   1 -13  305.37   18.10
  -4  -1  13  348.87   22.80
  -4  -1  13  366.56   17.70
   4   1  13  353.16   18.60
   4   1  13  345.67   25.70
  -5   1  13  178.58   10.70
  -5   1  13  180.28   11.50
   5  -1  13  189.98   12.00
  -5   1  13  193.68   11.50
  -5   1 -13  184.08   15.40
  -5  -1  13  188.48   10.90
  -5  -1  13  189.48   11.40
  -5  -1  13  143.29   15.10
  -6   1  13   21.50    3.70
   6  -1  13   24.00    3.60
  -6   1  13   22.20    3.50
  -6   1  13   26.80    3.10
  -6  -1  13   25.80    3.70
  -6  -1  13   17.60    3.30
  -6   1 -13   15.70    3.20
   6   1  13   20.40    3.20
  -6  -1  13   21.80    3.40
  -7   1  13   75.59    5.90
  -7  -1 -13   79.79    5.90
   7  -1  13   86.39    6.00
  -7  -1  13  103.29    8.00
  -7  -1  13   77.29    5.80
  -7   1 -13   77.69    5.80
   8  -1  13   12.70    2.90
   8   1 -13   12.80    2.40
   8  -1 -13   13.70    2.60
   0   2  13    0.70    1.60
   0  -2  13   -0.90    1.70
   0  -2  13    1.50    1.40
   0  -2 -13    0.30    2.50
  -1   2  13  381.56   18.90
  -1   2  13  390.76   19.30
   1  -2  13  416.26   18.90
  -1   2  13  378.16   19.30
   1   2 -13  398.26   22.30
  -1  -2 -13  364.26   21.70
   1  -2  13  400.36   20.50
  -1  -2  13  358.76   19.30
  -1  -2  13  378.16   19.00
   1   2  13  382.76   18.80
  -1  -2  13  404.96   24.90
   1  -2 -13  381.46   21.10
  -1  -2  13  395.16   18.90
  -1   2 -13  351.66   22.30
  -2   2  13   50.69    4.90
   2  -2  13   55.49    5.60
  -2   2  13   58.59    5.70
  -2   2  13   65.19    8.40
   2   2 -13   55.99    7.10
   2   2 -13   48.80    7.00
  -2  -2  13   53.49    8.90
   2   2  13   56.09    5.10
  -2  -2  13   62.49    5.30
  -2  -2  13   53.69    5.00
  -2  -2  13   56.69    5.10
  -2   2 -13   70.19    8.60
   2   2  13   61.79    9.90
   2   2  13   56.89    5.40
   2  -2 -13   63.49    7.80
   3   2 -13   45.20    6.60
  -3   2  13   54.89    5.40
  -3   2  13   50.99    4.60
  -3   2  13   42.50    5.20
   3  -2  13   48.20    5.20
   3   2 -13   46.20    7.20
   3   2  13   41.80    4.80
  -3  -2  13   57.49   14.50
   3   2  13   38.80    8.40
  -3  -2  13   50.39    5.00
  -3  -2  13   44.80    4.50
  -3  -2  13   47.70    5.00
   3  -2 -13   49.20    7.40
   3   2  13   39.50    4.80
   4   2 -13  460.75   24.60
  -4   2  13  439.66   21.70
   4   2 -13  427.96   24.20
  -4   2  13  416.96   21.80
  -4   2  13  449.36   20.80
   4  -2  13  464.45   20.40
   4  -2  13  438.06   22.10
   4   2  13  428.36   29.20
   4   2  13  422.36   20.80
  -4  -2  13  457.65   21.10
  -4  -2  13  441.96   21.30
  -4  -2  13  440.46   20.40
  -4   2 -13  385.36   20.90
  -4  -2  13  409.06   26.80
   4  -2 -13  396.66   23.60
  -5   2  13  146.99    9.10
  -5   2  13  169.18   15.10
   5  -2  13  140.89   11.70
  -5   2 -13  146.99    9.80
  -5  -2  13  139.79   11.30
  -5  -2  13  149.79    8.50
  -6   2  13   -2.20    1.30
   6  -2  13    0.40    1.30
  -6   2  13    0.90    1.60
  -6   2 -13    3.70    2.10
  -6  -2  13   -0.90    1.20
  -6  -2  13    0.50    1.00
  -7   2  13    9.30    2.50
   7  -2  13   15.70    2.60
  -7  -2  13   15.10    2.70
  -7   2 -13   10.90    2.50
  -7  -2  13   12.50    2.40
   8  -2  13    8.30    1.50
  -8  -2 -13   15.40    2.40
  -8   2  13   11.10    2.00
  -8   2 -13   12.00    2.30
  -8  -2  13   12.30    1.90
   8  -2 -13   14.90    2.10
   0  -3  13  329.87   16.90
   0  -3 -13  303.87   18.60
   0   3 -13  350.86   20.20
   0   3  13  304.87   16.90
   1  -3  13   52.19    5.30
   1  -3  13   57.69    5.60
  -1  -3 -13   49.80    7.90
  -1   3  13   48.60    6.30
   1   3 -13   59.79    7.30
  -1   3  13   44.80    4.90
  -1   3  13   58.89    9.80
  -1  -3  13   62.59    9.00
   1  -3 -13   40.90    7.70
  -1  -3  13   52.49    5.30
   1   3  13   45.40    6.20
  -1  -3  13   59.59    5.30
  -1   3 -13   63.19    8.40
  -2   3  13  241.98   13.40
   2   3 -13  253.67   16.40
   2   3 -13  233.68   16.10
  -2  -3 -13  224.98   16.50
   2  -3  13  245.48   14.20
  -2   3  13  225.98   14.10
  -2   3  13  263.07   14.00
   2   3  13  263.47   13.20
  -2  -3  13  251.37   13.10
  -2  -3  13  244.28   13.30
  -2   3 -13  260.77   18.00
  -2  -3  13  253.27   13.70
  -2  -3  13  254.07   18.70
   2   3  13  252.47   19.70
   3   3 -13   31.80    6.40
  -3   3  13   23.80    4.20
  -3   3  13   30.30    3.60
  -3   3  13   28.10    4.60
   3   3 -13   24.90    5.20
   3  -3  13   29.30    4.10
  -3  -3  13   23.10    3.60
   3   3  13   15.50    6.70
  -3  -3  13   28.70    3.60
  -3  -3  13   34.30    9.00
  -3   3 -13   23.20    6.10
  -3  -3  13   23.10    3.30
  -4   3  13  121.99    7.90
  -4   3  13  118.09    9.00
   4   3 -13  118.29    9.90
  -4   3  13  131.39    9.20
   4   3 -13  113.89   10.90
   4  -3  13  125.59    9.00
  -4  -3  13  114.79    7.80
   4   3  13  110.99   15.40
  -4  -3  13  116.09    7.50
  -4  -3  13   90.29   13.80
  -4  -3  13  119.09    8.30
  -4   3 -13  103.49    8.60
  -5   3  13   32.70    4.30
  -5   3  13   28.60    3.50
   5  -3  13   28.20    3.90
   5   3 -13   23.70    5.10
  -5  -3  13   33.10    3.80
  -5  -3  13   26.10   18.70
  -5  -3  13   31.10    3.40
  -5  -3  13   28.70    4.20
  -5   3 -13   22.90    4.50
  -6   3  13   55.09    5.40
   6  -3  13   53.59    5.20
  -6   3  13   52.69    4.40
  -6  -3  13   53.19    4.70
  -6   3 -13   52.89    5.30
  -6  -3  13   52.09    4.80
  -7   3  13  123.79    8.00
   7  -3  13  128.99    7.80
  -7  -3  13  125.79    7.50
  -7   3 -13  137.59   10.30
  -7  -3  13  127.49    7.40
   8  -3  13   66.49    4.00
  -8   3  13   57.99    4.50
   8  -3 -13   70.29    4.80
  -8  -3  13   61.99    4.20
   0  -4  13  113.19    8.20
   0   4 -13  113.19   10.70
   0  -4  13  113.49    8.00
   0   4  13  125.89    8.40
   1   4 -13  858.51   41.20
  -1   4  13  825.02   36.80
   1  -4  13  824.02   37.40
   1  -4  13  836.42   36.50
   1   4 -13  805.92   40.10
  -1   4 -13  825.62   41.00
  -1  -4  13  926.51   50.59
  -1  -4  13  798.32   35.60
  -1  -4  13  837.52   36.80
   1   4  13  838.72   36.50
   2   4 -13  425.76   23.90
   2   4 -13  421.86   24.20
  -2   4  13  428.56   20.80
   2  -4  13  420.96   21.50
  -2   4  13  436.56   21.40
   2  -4  13  420.66   20.00
   2   4  13  405.76   27.40
  -2  -4  13  427.86   20.80
  -2  -4  13  428.76   27.80
   2   4  13  437.26   20.10
  -2  -4  13  405.56   19.90
  -2   4 -13  445.66   25.50
   3  -4  13    4.00    1.80
  -3   4  13    2.40    1.50
   3   4 -13    2.30    4.30
   3   4 -13    1.30    2.60
  -3   4  13    4.40    2.80
   3   4  13   -4.10    8.30
  -3  -4  13    0.90    1.60
  -3  -4  13    3.80    6.40
  -3  -4  13    2.00    1.30
  -3  -4  13    1.50    1.30
   4   4 -13  155.08   11.40
  -4   4  13  130.39   11.70
  -4   4 -13  137.89    9.90
  -4  -4  13  159.28    8.70
  -4  -4  13  141.29    9.70
  -5   4  13   88.79    7.20
  -5   4  13   91.69    6.40
   5   4 -13   85.39    7.80
   5  -4  13   93.29    7.30
  -5  -4  13   89.09    6.70
  -5   4 -13   81.79    7.40
  -5  -4  13   92.09    6.40
  -5  -4  13   94.59    6.50
  -6   4  13   50.89    5.00
  -6   4  13   40.10    5.40
   6  -4  13   53.69    5.10
  -6  -4  13   55.09    4.50
  -6  -4  13   56.99    4.70
  -6   4 -13   53.39    5.20
   7  -4  13    7.40    1.80
  -7   4  13    7.40    2.00
  -7  -4  13    5.00    1.30
  -7  -4  13    6.90    1.70
   7  -4 -13    6.20    1.70
  -7   4 -13    9.70    2.80
   0  -5  13   80.19    6.70
   0   5  13   89.19    6.80
   0   5 -13   78.09    9.60
   0  -5  13   89.89    6.80
   1  -5  13   12.00    2.90
   1   5 -13   10.20    5.10
   1  -5  13   11.10    2.40
   1   5 -13    8.80    3.40
  -1   5  13    8.30    2.30
  -1   5 -13   13.20    6.30
  -1  -5  13    6.20    6.20
  -1  -5  13   12.40    2.50
  -1  -5  13   10.50    2.50
   1   5  13   13.90    2.80
   2  -5  13   59.49    5.40
   2   5 -13   59.99    7.60
  -2   5  13   59.19    5.50
   2  -5  13   67.39    6.20
   2   5 -13   60.89    8.80
  -2  -5  13   70.39    5.80
  -2  -5  13   63.89    5.20
  -2   5 -13   50.79    9.50
   2   5  13   64.49    5.50
  -2  -5  13   49.60   11.50
   3   5 -13   21.30    7.00
  -3  -5  13   37.00    4.30
  -3  -5  13   35.90    4.30
  -3  -5  13   44.30    6.20
  -3  -5  13   39.10   17.40
  -4   5  13   39.60    4.30
   4  -5  13   45.10    4.90
  -4   5  13   34.80    4.90
   4   5 -13   44.60    5.90
  -4   5 -13   38.90    5.80
  -4  -5  13   45.80    4.50
  -4  -5  13   40.70    3.90
  -4  -5  13   46.60    4.20
  -5   5  13   90.49    6.50
   5  -5  13  104.09    7.40
   5   5 -13   90.29    7.70
  -5   5  13   92.29    7.40
  -5   5 -13   90.29   10.00
  -5  -5  13   92.99    6.30
  -5  -5  13   89.19    6.50
   6  -5  13   59.99    4.90
  -6   5  13   54.39    4.10
   6   5 -13   41.90    5.00
  -6   5 -13   53.49    6.90
  -6  -5  13   51.69    4.10
  -6  -5  13   50.29    4.10
   7  -5  13   95.19    5.60
  -7  -5  13   93.59    5.30
  -7  -5  13   96.89    5.80
  -7   5 -13   78.29    7.60
   7  -5 -13   88.09    5.40
   0  -6  13  170.18   14.30
   0   6 -13  193.78   14.50
   0  -6  13  204.88   12.80
   1   6 -13   70.09   12.30
   1  -6  13   95.99    8.20
   1  -6  13   78.69    6.80
  -1  -6  13   75.59    5.60
  -1  -6  13   56.99    7.60
  -1  -6  13   52.69   19.90
   1   6  13   84.09    6.10
   2  -6  13   18.50    3.30
  -2   6  13   19.10    3.40
   2  -6  13   29.00    3.50
   2   6 -13   24.40    4.80
  -2  -6  13   24.10    3.20
  -2  -6  13   20.40    3.30
   3  -6  13   83.49    6.80
   3   6 -13   79.99    8.20
  -3   6  13   83.29    6.40
   3  -6  13   70.19    5.40
  -3  -6  13   84.89    5.90
  -3  -6  13   80.69    6.20
  -3  -6  13   75.49    5.60
  -4   6  13   29.40    3.50
   4  -6  13   29.40    3.90
   4   6 -13   27.80    4.70
  -4   6 -13   19.80    4.20
  -4  -6  13   30.70    3.10
  -4  -6  13   27.80    3.50
  -4  -6  13   30.40    3.30
   5  -6  13    9.60    2.70
  -5   6  13   10.00    2.80
   5   6 -13    6.70    2.10
  -5  -6  13    2.60    1.60
  -5   6 -13    5.00    3.40
   5  -6 -13    4.80    3.00
  -5  -6  13    6.20    2.30
   6   6 -13    4.10    2.70
   6  -6  13    3.60    1.20
  -6   6  13    0.70    1.20
  -6  -6  13    1.50    1.10
  -6  -6  13    3.20    1.10
  -6   6 -13   10.00    2.80
   6  -6 -13    3.50    1.50
   0  -7  13   40.50    4.20
   0   7  13   35.80    4.30
   1   7 -13   83.49    8.60
   1  -7  13   86.99    6.30
  -1   7  13   75.39    6.30
   1  -7  13   82.59    6.10
  -1   7 -13   91.69    8.90
  -1  -7  13   95.19    6.80
  -1  -7  13   84.79    5.70
   1   7  13   89.89    6.20
   2   7 -13   87.89    8.80
   2  -7  13   91.39    6.20
  -2   7  13   91.19    6.80
   2  -7  13   88.59    6.40
  -2  -7  13   96.09    6.70
  -2   7 -13   96.39    8.90
  -2  -7  13   95.29    6.00
   3  -7  13  102.89    7.00
   3   7 -13  100.89    8.90
   3  -7  13   94.59    6.00
  -3   7  13  103.99    7.10
  -3  -7  13   97.29    6.90
  -3  -7  13  102.29    6.40
  -3   7 -13  105.49    8.90
  -3  -7  13  102.49    6.80
   4  -7  13    3.50    1.40
  -4   7  13    2.00    1.30
   4   7 -13    6.20    2.70
  -4  -7  13    4.30    1.90
  -4  -7  13    3.90    1.30
  -4   7 -13    4.70    1.90
  -5   7  13    3.80    1.20
   5  -7  13    5.20    1.90
   5   7 -13    8.70    2.20
  -5  -7  13    6.40    1.20
  -5   7 -13    7.30    2.10
  -5  -7  13    8.20    2.40
   0  -8  13   46.60    4.20
   0   8 -13   46.90    5.80
   0   8  13   51.39    4.40
   1  -8  13    3.40    1.40
  -1   8  13    1.20    1.60
   1   8 -13    4.70    2.20
  -1   8 -13    3.10    1.90
   1   8  13    4.20    2.20
  -1  -8  13    2.10    2.00
  -1  -8  13    2.00    1.20
   2  -8  13   60.19    4.40
   2   8 -13   67.39    6.60
  -2  -8  13   55.99    4.20
  -2  -8  13   56.59    4.10
  -2   8 -13   54.49    8.40
  -2  -8  13   60.39    4.70
   3  -8  13   47.10    3.50
  -3   8  13   49.30    4.20
   3  -8  13   53.19    4.10
   3   8 -13   53.09    5.50
  -3  -8  13   52.79    4.10
  -3   8 -13   45.50    5.10
  -3  -8  13   52.29    4.10
  -3  -8  13   44.50    3.30
  -4   8  13   27.20    2.90
   4   8 -13   20.00    4.70
   4  -8  13   27.30    2.60
  -4  -8  13   26.30    2.40
  -4   8 -13   25.30    3.70
   0  -9  13   23.70    2.60
   0   9  13   22.50    2.70
   0   9 -13   26.60    3.60
  -1   9  13    0.90    1.10
   1   9 -13    2.90    2.00
   1  -9  13    1.10    1.20
  -1   9 -13    4.90    1.80
  -1  -9  13    2.80    1.10
   2  -9  13    1.60    0.90
  -2   9  13    1.20    1.10
  -2  -9  13    0.40    0.70
  -2  -9  13    1.70    1.10
  -2   9 -13    2.20    1.50
   3   9 -13   59.29    4.80
  -3   9  13   51.99    4.60
  -3  -9  13   52.49    3.80
  -3  -9  13   58.89    4.40
  -3   9 -13   46.10    4.50
   0   0 -14  161.88   12.80
   0   0  14  151.38    9.60
   0   0  14  152.18    9.70
  -1   0 -14  391.76   22.80
  -1   0  14  371.66   18.30
   1   0 -14  391.26   21.90
   1   0  14  355.36   18.30
   1   0  14  372.96   18.60
  -1   0  14  327.37   20.60
  -2   0 -14  125.19   11.90
  -2   0  14  126.89    8.30
  -2   0  14  125.59    8.40
   2   0  14  115.39    8.50
   2   0 -14  120.19   10.90
  -2   0  14  110.79    6.50
   2   0  14  132.69    8.40
  -2   0  14  126.19    8.90
   3   0 -14  133.89   11.80
  -3   0  14  143.99    9.40
   3   0  14  154.98    9.10
  -3   0  14  146.29    9.20
  -3   0  14  147.09   10.00
   3   0  14  155.08   10.00
  -4   0  14  392.66   18.90
  -4   0  14  341.17   18.80
   4   0  14  378.36   19.20
   4   0 -14  366.66   21.90
  -4   0  14  372.06   18.00
  -5   0  14  210.38   12.20
  -5   0 -14  216.38   12.40
  -5   0  14  214.18   12.60
  -5   0  14  224.48   11.60
   5   0  14  220.78   12.60
  -6   0 -14  489.85   23.50
   6   0  14  493.45   22.60
  -6   0  14  484.65   22.90
  -6   0  14  495.25   23.30
  -6   0  14  505.25   21.90
  -7   0 -14    2.70    3.10
   7   0  14    1.90    1.60
  -7   0  14   -0.30    1.10
  -8   0  14   19.10    2.30
   8   0 -14   17.00    1.90
   0  -1  14  217.78   12.50
   0  -1  14  219.28   14.90
   0   1  14  224.68   12.50
   0   1 -14  226.38   15.90
   0  -1 -14  213.08   15.40
   0  -1  14  238.78   13.50
   0   1  14  226.28   12.60
   0  -1  14  223.68   12.60
   0  -1  14  204.28   12.40
   1  -1  14  804.92   35.90
   1   1 -14  856.21   39.80
  -1   1  14  775.92   36.40
  -1   1  14  825.72   35.60
   1  -1  14  794.92   34.90
   1  -1  14  813.22   35.70
  -1  -1 -14  800.32   39.60
   1  -1  14  744.93   33.10
   1   1  14  807.32   35.40
   1  -1 -14  847.22   39.00
   1   1  14  785.42   35.40
  -1  -1  14  750.02   36.40
  -1  -1  14  826.72   35.50
  -1  -1  14  782.92   35.60
  -1   1 -14  851.21   40.80
  -2   1  14   29.40    4.20
  -2   1  14   31.30    4.60
  -2  -1 -14   25.00    6.00
   2   1 -14   17.00    4.80
  -2   1  14   22.10    3.40
   2  -1  14   25.10    3.90
   2  -1  14   22.00    3.60
   2   1 -14   28.10    5.80
  -2  -1  14   23.30    3.20
  -2   1 -14   16.50    5.30
  -2  -1  14   19.40    3.30
   2   1  14   24.10    3.70
  -2  -1  14   17.90    6.00
   2   1  14   25.90    3.70
   2  -1 -14   18.20    5.00
  -2  -1  14   25.60    3.90
   3  -1  14  968.50   42.60
   3  -1  14 1014.30   41.30
  -3   1  14 1023.50   42.10
  -3   1  14  948.31   41.30
  -3   1  14  936.81   42.40
   3   1 -14  922.01   45.00
  -3  -1  14  955.80   42.10
  -3  -1  14  883.71   44.80
   3   1  14  932.41   41.80
  -3  -1  14  977.70   41.40
   3  -1 -14 1033.30   45.30
  -3  -1  14  960.90   41.20
   3   1  14  939.91   40.60
   4  -1  14  166.58   10.60
  -4   1  14  159.48   10.50
  -4   1  14  177.18   10.60
  -4   1  14  162.28    9.70
   4   1  14  148.39    9.90
  -4  -1  14  161.98    9.50
   4  -1 -14  166.98   16.20
  -4  -1  14  159.28   10.30
   4   1  14  116.49   17.00
  -4  -1  14  179.18   10.20
  -5   1  14   47.80    4.90
  -5  -1 -14   51.49    5.60
  -5   1  14   60.89    5.70
  -5   1  14   59.79    4.90
   5  -1  14   54.19    5.50
  -5  -1  14   59.29    5.60
   5   1  14   57.79    5.20
  -5  -1  14   54.39    4.60
  -5  -1  14   57.79    5.30
  -5   1 -14   51.09    5.90
  -6  -1 -14    2.00    2.30
  -6   1  14    3.60    1.80
  -6   1  14    3.40    1.80
   6  -1  14    1.10    1.60
  -6   1  14    8.20    2.50
  -6  -1  14    2.30    1.50
   6   1  14    6.70    1.90
  -6   1 -14    7.70    2.80
  -6  -1  14    3.60    1.70
  -6  -1  14    5.90    1.60
  -7   1  14   36.30    3.60
   7  -1  14   34.90    3.80
  -7  -1 -14   47.60    4.70
  -7  -1  14   37.60    3.80
  -7  -1  14   36.70    3.70
  -7   1 -14   51.69    6.30
   8   1 -14  184.68    9.60
   8  -1 -14  195.78    9.40
   0   2  14   14.90    4.70
   0  -2  14   17.70    2.90
   0   2  14   18.60    3.20
   0  -2  14   11.00    2.40
   0  -2 -14   16.20    4.60
   0  -2  14   10.50    4.20
   0   2 -14   10.20    3.70
  -1  -2 -14  161.38   13.90
   1  -2  14  196.38   11.30
   1  -2  14  196.58   11.80
  -1   2  14  200.68   11.90
   1   2 -14  184.98   14.30
  -1   2  14  195.98   11.40
   1  -2 -14  177.88   13.80
  -1  -2  14  205.38   11.40
  -1   2 -14  208.58   15.60
  -1  -2  14  189.88   14.10
   1   2  14  210.78   11.60
  -1  -2  14  193.98   11.40
   2  -2  14  224.58   13.30
  -2  -2 -14  201.98   16.00
  -2   2  14  230.38   12.70
  -2   2  14  214.48   13.20
  -2   2  14  238.68   12.90
   2   2 -14  203.38   15.30
   2   2 -14  221.58   14.90
   2  -2 -14  194.68   15.10
   2   2  14  239.88   12.40
  -2  -2  14  227.88   12.20
  -2  -2  14  224.18   12.30
  -2   2 -14  253.87   17.90
  -2  -2  14  236.38   13.00
  -3   2  14  667.03   32.00
   3   2 -14  696.53   34.90
  -3   2  14  748.53   31.90
   3  -2  14  744.73   31.10
  -3   2  14  708.23   31.10
   3   2 -14  622.74   33.00
   3  -2  14  719.03   32.30
   3   2  14  692.53   40.00
  -3  -2  14  712.43   30.90
   3  -2 -14  678.93   34.10
   3   2  14  686.33   30.90
  -3   2 -14  595.94   35.90
  -3  -2  14  690.43   30.70
  -3  -2  14  713.23   31.60
  -4   2  14  215.18   13.40
   4  -2  14  196.38   12.40
  -4   2  14  202.78   11.50
  -4   2  14  201.88   12.60
  -4  -2  14  205.98   12.20
   4   2  14  212.28   12.10
  -4  -2  14  209.98   12.00
  -4  -2  14  183.48   12.70
  -5   2  14   70.19    5.90
  -5   2  14   72.29    5.40
  -5   2  14   71.89    6.30
   5  -2  14   63.39    6.00
  -5  -2  14   61.49    5.60
  -5   2 -14   50.39    6.50
  -5  -2  14   67.79    5.40
  -5  -2  14   71.69    5.10
  -6   2  14   64.79    5.50
  -6   2  14   75.69    6.20
   6  -2  14   78.09    5.90
  -6  -2  14   68.19    5.30
  -6   2 -14   72.59    6.30
  -6  -2  14   66.19    5.60
  -7   2  14   57.79    4.70
   7  -2  14   68.19    4.90
  -7  -2 -14   59.39    4.60
  -7  -2  14   62.19    4.70
  -7   2 -14   56.69    5.10
  -7  -2  14   66.09    4.80
   0  -3 -14   39.30    7.70
   0   3 -14   38.90    7.10
   0  -3  14   50.59    4.90
   0   3  14   47.30    4.80
   0  -3  14   36.40    4.40
  -1   3  14   60.39    5.60
   1   3 -14   79.99    8.90
  -1  -3 -14   46.70    8.50
   1  -3  14   68.29    6.20
   1  -3  14   67.19    5.70
  -1  -3  14   71.59   10.50
   1   3  14   72.29    5.70
  -1   3 -14   65.19    8.60
  -1  -3  14   60.59    5.70
  -1  -3  14   67.79    5.60
   2   3 -14  892.01   46.30
   2  -3  14 1017.40   44.00
  -2   3  14 1040.60   43.20
  -2   3  14  981.00   42.90
  -2   3  14 1020.20   44.20
   2   3 -14 1013.40   46.90
  -2  -3 -14  867.21   46.10
  -2  -3  14 1031.60   43.30
  -2   3 -14 1007.70   48.50
  -2  -3  14  996.00   42.00
  -2  -3  14  982.60   48.90
  -2  -3  14 1004.30   42.70
   2   3  14 1072.59   42.50
  -3   3  14  204.18   13.60
   3   3 -14  216.08   16.10
   3  -3  14  245.38   14.10
  -3   3  14  252.77   13.30
  -3   3  14  273.27   14.20
   3   3 -14  220.48   15.20
   3   3  14  205.78   20.50
  -3  -3  14  194.88   17.70
  -3  -3  14  250.97   12.90
  -3   3 -14  246.88   18.50
  -3  -3  14  250.97   13.50
  -3  -3  14  251.07   12.70
   4  -3  14   18.80    3.60
   4   3 -14   25.30    5.20
   4  -3  14   22.30    3.20
  -4   3  14   23.30    4.00
  -4   3  14   27.00    3.70
  -4  -3  14   28.80    3.50
  -4  -3  14   24.80    3.40
  -4  -3  14   29.40    3.70
  -5   3  14  189.48   11.50
   5  -3  14  194.58   11.70
  -5   3  14  201.08   10.70
  -5  -3  14  192.78    9.90
  -5  -3  14  187.08   10.70
  -5   3 -14  194.28   13.90
  -5  -3  14  190.48   11.20
  -6   3  14   92.39    6.80
  -6   3  14   93.39    5.90
   6  -3  14   98.59    6.90
  -6   3 -14   94.09    8.80
  -6  -3  14   98.69    6.60
  -6  -3  14   93.99    6.20
  -7   3  14    5.60    1.90
  -7  -3  14    5.00    1.50
  -7  -3  14    6.50    1.70
  -7   3 -14   -0.10    3.80
   0  -4  14   32.10    4.00
   0   4  14   24.00    3.90
   0   4 -14   16.60    5.20
   0  -4  14   29.30    3.80
   1   4 -14  205.08   15.10
   1   4 -14  217.98   17.90
  -1   4  14  194.58   12.10
   1  -4  14  215.08   12.70
   1  -4  14  212.88   11.80
   1   4  14  219.88   12.10
  -1  -4  14  208.48   12.00
  -1  -4  14  197.68   17.50
  -1   4 -14  227.98   18.20
   2  -4  14    3.70    1.90
   2  -4  14    5.10    1.70
   2   4 -14    1.50    2.30
  -2   4  14    2.20    1.70
   2   4 -14    3.40    4.30
  -2  -4  14    3.30    1.80
  -2  -4  14    4.80    1.70
  -2  -4  14   -2.40    5.80
  -2   4 -14   -0.40    4.50
   2   4  14    9.80    2.50
  -2  -4  14    5.80    1.90
   3  -4  14    2.50    2.10
  -3   4  14    2.90    2.50
  -3  -4  14    3.20    1.80
  -3  -4  14    9.70    3.20
  -3  -4  14    9.80   12.30
  -3  -4  14    0.70    1.80
   4   4 -14  174.18   12.00
  -4   4  14  175.88   10.30
   4  -4  14  177.78   11.10
  -4   4  14  177.88   11.20
  -4  -4  14  169.38    9.90
  -4  -4  14  180.68    9.60
  -4  -4  14  176.88   10.50
  -5   4  14  146.79    9.50
   5   4 -14  149.29    9.60
   5  -4  14  136.79    7.50
  -5   4  14  139.39    8.40
   5  -4  14  146.39    9.30
  -5  -4  14  139.59    8.30
  -5  -4  14  136.79    7.60
  -5  -4  14  143.89    8.80
  -5   4 -14  138.79    9.40
   6  -4  14    2.20    1.50
  -6   4  14    3.10    1.60
  -6   4  14    2.10    1.10
  -6  -4  14    0.30    1.00
  -6  -4  14    1.30    1.10
   7  -4  14   21.50    2.30
  -7  -4  14   18.90    2.30
  -7  -4  14   18.50    2.10
   0   5 -14   42.10    6.50
   0  -5  14   37.30    4.30
   0  -5  14   38.90    4.40
   0   5  14   41.40    4.60
  -1   5  14  183.48   11.50
   1   5 -14  201.68   14.90
   1  -5  14  185.78   11.60
  -1  -5  14  200.38   11.70
  -1  -5  14  185.78   18.20
   2  -5  14  115.89    8.30
   2   5 -14  112.29   10.40
   2  -5  14  105.49    7.00
  -2   5  14  114.09    7.90
  -2  -5  14  107.79    7.00
  -2  -5  14  108.19    7.70
  -2  -5  14  107.49    7.40
   3  -5  14    0.40    1.20
   3   5 -14   -0.90    2.10
  -3   5  14    1.80    1.40
  -3  -5  14    1.20    1.20
  -3  -5  14   -0.90    0.90
  -3  -5  14    1.30    1.40
   4   5 -14   42.50    5.30
   4  -5  14   41.80    4.50
  -4   5  14   36.80    4.10
  -4  -5  14   41.50    4.20
  -4  -5  14   38.20    3.60
  -4  -5  14   37.50    3.80
   5  -5  14   12.10    2.60
  -5   5  14    8.30    2.30
   5  -5  14   10.00    2.70
   5   5 -14    8.30    2.70
  -5  -5  14    7.90    2.10
  -5  -5  14   11.40    2.80
  -6   5  14   64.99    4.20
   6  -5  14   67.99    4.90
  -6  -5  14   59.89    4.30
  -6  -5  14   58.59    5.60
   6  -5 -14   64.09    4.50
   0   6 -14   20.20    4.90
   0   6  14   12.90    2.70
   0  -6  14   20.10    3.00
   1  -6  14    8.70    2.10
  -1   6  14    9.80    2.40
   1  -6  14    7.60    2.00
   1   6 -14    7.80    3.20
  -1  -6  14   10.90    2.50
   1   6  14   10.90    2.20
  -1   6 -14    9.70    3.30
  -2   6  14   33.90    4.00
   2   6 -14   30.70    5.40
   2  -6  14   34.10    4.00
   2  -6  14   32.70    3.60
  -2  -6  14   33.50    3.80
  -2  -6  14   30.50    3.40
  -2  -6  14   33.40    3.50
   3   6 -14   83.09    7.90
   3  -6  14   76.09    6.20
  -3   6  14   69.99    5.90
  -3  -6  14   71.29    5.20
  -3  -6  14   75.69    5.90
  -3  -6  14   73.39    5.20
  -4   6  14   47.60    4.30
   4   6 -14   44.50    5.60
   4  -6  14   40.50    4.10
  -4  -6  14   50.49    4.60
  -4  -6  14   46.60    4.50
  -4  -6  14   43.40    4.00
   5  -6  14   46.20    3.30
  -5   6  14   48.00    3.80
   5   6 -14   46.60    4.80
   5  -6  14   51.99    4.30
  -5  -6  14   42.60    3.50
  -5  -6  14   46.60    3.90
   6  -6  14   40.80    4.40
  -6   6  14   53.59    3.40
  -6  -6  14   53.19    3.50
  -6   6 -14   53.89    4.10
  -6  -6  14   59.49    3.60
   0  -7  14    8.80    2.00
   0   7 -14    5.20    2.20
   0   7  14    7.10    1.80
  -1   7  14   21.50    3.20
   1  -7  14   23.50    3.00
  -1   7 -14   18.40    4.50
   1   7  14   11.90    2.30
  -1  -7  14   17.10    2.80
  -2   7  14    7.70    2.00
   2   7 -14   16.80    3.60
   2  -7  14   13.10    2.20
  -2  -7  14    9.30    1.80
  -2   7 -14   14.60    3.90
  -2  -7  14   12.50    2.20
  -2  -7  14    9.40    2.10
   3  -7  14   89.39    5.90
  -3   7  14   83.99    6.70
   3   7 -14   78.09    8.60
  -3  -7  14   81.29    5.20
  -3  -7  14   86.19    5.50
  -3  -7  14   88.29    6.00
   4  -7  14   54.79    4.30
  -4   7  14   43.80    4.00
   4   7 -14   51.09    5.10
  -4   7 -14   53.79    5.30
  -4  -7  14   50.99    4.10
  -4  -7  14   51.19    4.50
   5  -7  14   41.00    3.10
   5   7 -14   38.70    3.60
  -5   7  14   41.00    3.40
  -5  -7  14   39.40    2.90
  -5  -7  14   43.30    3.40
  -5   7 -14   38.90    3.80
   0   8  14   10.50    3.30
   0  -8  14   14.30    2.20
   0   8 -14   11.10    3.00
   1  -8  14   55.89    4.30
   1   8 -14   59.49    6.00
  -1   8  14   54.69    4.50
  -1  -8  14   60.99    4.50
  -1   8 -14   58.59    6.00
  -2   8  14    7.80    1.70
   2   8 -14   15.80    3.40
   2  -8  14   13.80    2.30
  -2  -8  14    9.60    1.70
  -2  -8  14   11.50    2.00
  -2   8 -14   10.60    2.60
  -2  -8  14   10.50    2.30
   3   8 -14   13.40    2.90
  -3   8  14    8.30    2.00
  -3   8 -14    7.60    2.10
  -3  -8  14    7.60    1.50
  -3  -8  14   12.70    2.00
  -4   8  14   22.20    3.00
   4   8 -14   29.30    3.30
   4  -8  14   30.20    2.20
  -4   8 -14   31.70    3.40
  -4  -8  14   31.70    3.00
  -4  -8  14   32.20    2.60
   0   9 -14   11.00    2.40
   0  -9  14   10.30    1.60
  -1   9  14    5.20    1.60
   1  -9  14    8.70    1.60
   1   9 -14   10.60    2.30
  -1   9 -14    8.80    2.30
  -1  -9  14    6.30    1.20
  -1  -9  14   11.10    1.60
  -2   9  14    1.50    1.10
   2   9 -14    3.80    1.90
  -2  -9  14    3.40    1.20
  -2   9 -14    3.20    1.50
   0   0 -15    5.70    4.10
   0   0  15    2.10    2.10
   1   0  15    7.20    2.10
   1   0 -15    3.20    3.60
  -1   0 -15    0.40    3.60
  -1   0  15    8.30    2.80
   1   0  15    7.10    2.10
  -1   0  15    7.40    2.10
  -2   0 -15  139.69   13.20
   2   0  15  131.19    9.00
   2   0 -15  120.59   12.00
  -2   0  15  126.69    8.60
  -2   0  15  126.99    9.20
  -2   0  15  132.59    8.70
   2   0  15  133.29    8.60
  -3   0  15  161.38    9.70
   3   0  15  147.19    9.80
  -3   0  15  149.69    9.10
  -3   0  15  145.79   10.00
  -3   0 -15  127.39   13.70
   3   0  15  152.98    8.90
   3   0 -15  133.69   12.90
  -4   0  15    3.70    2.50
  -4   0  15    4.40    1.80
   4   0  15    5.40    1.80
  -4   0  15    3.20    1.70
  -5   0  15    1.90    1.70
  -5   0  15    0.20    1.40
   5   0  15   -0.50    1.30
  -5   0  15   -1.60    1.00
   6   0  15  127.49    7.50
  -6   0  15  142.99    8.70
  -6   0  15  146.49    8.20
  -6   0  15  126.79    8.30
  -7   0  15    4.60    1.80
   0  -1 -15   73.09    9.10
   0  -1  15   71.49    6.30
   0  -1  15   80.79    6.60
   0   1  15   76.49    6.50
   0   1  15   78.49    6.90
   0   1 -15   79.59    9.70
   1  -1  15  365.06   18.30
   1   1 -15  354.96   21.90
  -1   1  15  387.26   18.50
  -1  -1 -15  344.67   21.90
   1  -1  15  345.97   18.30
  -1   1  15  365.76   18.60
   1  -1 -15  355.96   21.30
  -1  -1  15  357.26   18.10
  -1   1 -15  359.56   23.00
   1   1  15  362.16   18.20
  -1  -1  15  348.57   18.30
   2   1 -15   43.60    7.80
   2   1 -15   41.70    7.40
   2  -1  15   40.10    4.20
  -2   1  15   43.60    4.50
  -2   1  15   46.00    5.30
  -2   1  15   40.70    5.20
   2  -1  15   34.40    4.60
  -2  -1  15   36.70    4.80
  -2  -1  15   34.20    5.10
   2   1  15   42.80    4.70
  -2  -1  15   33.70    4.80
  -2  -1  15   40.00    4.30
   2  -1 -15   44.80    7.80
  -2  -1  15   26.90    8.00
  -2   1 -15   42.20    8.40
   2   1  15   36.30    4.20
  -3   1  15   28.70    3.60
   3  -1  15   30.10    4.10
  -3  -1 -15   11.40    6.30
  -3   1  15   26.90    4.10
   3  -1  15   24.10    3.70
  -3   1  15   28.50    4.60
  -3  -1  15   19.70    3.50
   3   1  15   21.60    3.60
  -3  -1  15   28.30    3.40
  -3  -1  15   30.90    4.00
  -3  -1  15   17.30    5.50
   3   1  15   33.30    4.40
   4  -1  15   68.49    6.00
  -4   1  15   68.99    5.60
  -4   1  15   60.99    5.80
  -4   1  15   69.79    6.40
  -4  -1  15   65.59    5.40
   4   1  15   72.29    5.90
  -4  -1  15   73.79    5.70
  -4  -1  15   73.59    6.20
  -4  -1  15   55.99    9.90
  -5   1  15  125.79    8.20
  -5   1  15  125.49    7.60
   5  -1  15  114.99    8.00
  -5   1  15  115.89    8.30
  -5  -1  15  118.89    8.10
  -5  -1  15  119.79    7.80
   5   1  15  121.19    7.60
  -5  -1  15  117.89    7.10
  -6   1  15   80.39    5.50
  -6   1  15   59.79    6.60
   6  -1  15   85.69    5.80
  -6  -1  15   83.59    6.00
  -6  -1  15   73.89    6.80
   7  -1  15   22.20    2.40
  -7   1  15   24.10    3.40
  -7  -1  15   26.00    3.50
   0  -2  15 1339.27   52.59
   0   2 -15 1141.19   56.89
   0   2  15 1205.48   52.39
   0  -2 -15 1158.38   55.79
   0  -2  15 1313.87   53.09
   0  -2  15 1173.68   53.49
   0  -2  15 1339.37   52.99
  -1   2  15   14.60    3.10
  -1   2  15   14.10    3.10
   1  -2  15   12.80    2.90
   1   2 -15    7.40    3.20
   1  -2  15   10.80    3.90
   1  -2  15    9.70    2.60
   1  -2  15   11.30    2.40
   1   2 -15    7.60    4.20
   1  -2  15   14.30   10.70
  -1  -2 -15   15.30    6.30
  -1  -2  15    5.80    4.70
  -1   2 -15   11.80    5.30
   1  -2 -15    8.10    5.70
  -1  -2  15    8.40    2.50
  -1  -2  15   15.30    2.60
   1   2  15   15.20    3.00
  -2  -2 -15   28.40    7.90
   2  -2  15   43.00    5.00
   2   2 -15   46.90    8.40
  -2   2  15   40.70    5.20
   2  -2  15   33.70    3.70
   2   2 -15   43.60    6.70
  -2   2  15   40.60    4.40
  -2   2  15   55.49    5.70
   2  -2  15   34.30    4.70
   2  -2  15   45.70    4.60
  -2  -2  15   47.00    4.50
   2   2  15   48.20    4.50
  -2  -2  15   44.50    4.90
  -2   2 -15   37.80    8.50
  -2  -2  15   35.70    7.40
  -2  -2  15   50.09    5.00
   3   2 -15   14.60    4.30
  -3   2  15   13.80    3.90
  -3   2  15    9.60    2.80
  -3   2  15    8.00    2.20
   3  -2  15    8.40    2.60
  -3  -2  15   13.70    4.20
  -3  -2  15    8.30    2.00
  -3  -2  15    6.80    6.50
  -3  -2  15    8.40    2.30
   4  -2  15  232.38   11.30
  -4   2  15  215.78   13.10
  -4   2  15  209.18   11.90
  -4   2  15  215.18   12.60
   4  -2  15  220.08   12.90
  -4  -2  15  207.48   12.40
  -4  -2  15  230.08   12.00
  -4  -2  15  229.18   11.70
   5  -2  15   81.09    6.30
  -5   2  15   80.89    6.30
  -5   2  15   81.29    5.80
  -5  -2  15   73.29    5.10
  -5  -2  15   73.49    5.80
  -5  -2  15   69.99    5.90
  -6   2  15  297.27   14.40
  -6   2  15  295.37   15.00
   6  -2  15  301.87   14.90
  -6  -2  15  291.77   14.50
  -6  -2  15  342.17   16.20
   7  -2  15   37.10    2.80
  -7   2  15   31.90    3.10
  -7  -2  15   38.30    3.60
  -7  -2  15   30.10    2.90
   0  -3  15  776.92   33.30
   0   3  15  728.23   33.00
   0   3 -15  734.73   39.80
   0  -3  15  740.23   33.30
   0  -3  15  727.13   32.70
   0  -3  15  724.73   36.70
   1  -3  15  172.58   13.60
   1  -3  15  175.08   11.00
   1   3 -15  177.48   13.50
   1  -3  15  184.78   10.30
  -1   3  15  176.88   10.90
   1   3 -15  172.28   14.50
  -1  -3  15  176.18   10.60
  -1  -3  15  177.18   10.70
   1   3  15  172.88   10.50
  -1   3 -15  181.78   15.10
   2  -3  15  301.07   16.40
   2   3 -15  342.87   27.50
   2   3 -15  291.47   18.60
  -2   3  15  322.37   16.00
  -2  -3  15  253.37   19.60
  -2  -3  15  310.77   15.50
  -2   3 -15  287.27   27.30
  -2  -3  15  304.87   15.90
   3  -3  15  977.20   42.70
  -3   3  15  955.90   41.60
  -3   3  15  980.00   42.10
   3  -3  15 1017.20   41.50
   3   3 -15  955.90   44.30
  -3  -3  15  945.31   40.90
  -3  -3  15  983.10   42.00
  -3  -3  15  936.71   51.29
  -3  -3  15  956.60   41.10
  -4   3  15   96.19    6.80
   4   3 -15   97.99    9.70
   4  -3  15   96.29    6.20
   4  -3  15   92.79    7.30
  -4   3  15   99.89    7.40
  -4  -3  15   92.29    6.50
  -4  -3  15   91.19    6.30
  -4  -3  15   97.29    7.20
  -5   3  15  182.48    9.90
  -5   3  15  184.98   10.70
   5  -3  15  174.78   10.50
  -5  -3  15  184.58    9.90
  -5  -3  15  171.88   10.20
  -5  -3  15  178.48    9.10
   6  -3  15   42.60    3.90
  -6   3  15   34.70    4.20
  -6   3  15   40.30    3.90
  -6  -3  15   38.00    3.40
  -6  -3  15   39.90    3.70
   7  -3  15   13.90    1.50
  -7  -3  15   13.20    2.00
   7  -3 -15   19.30    2.50
  -7  -3  15   17.00    2.10
   0   4  15   53.49    5.90
   0  -4  15   44.20    9.60
   1  -4  15  284.97   16.80
   1  -4  15  273.47   13.90
  -1  -4  15  222.98   16.40
   1   4  15  266.77   15.90
  -1  -4  15  293.07   25.30
   2  -4  15    9.50    2.60
  -2   4  15    7.50    2.10
   2   4 -15    5.70    2.60
  -2  -4  15   10.40    2.30
   2   4  15    9.20    2.20
  -2  -4  15    5.90    2.00
  -2  -4  15    9.10    9.90
  -2  -4  15    8.30    2.50
   3   4 -15   56.59    6.80
   3  -4  15   57.19    5.40
  -3   4  15   53.99    5.10
  -3  -4  15   58.19    4.70
  -3  -4  15   49.70    4.50
  -3  -4  15   59.39    5.30
   4  -4  15    6.40    1.80
  -4   4  15    6.00    1.80
  -4   4  15    4.80    2.50
   4   4 -15    8.60    4.40
   4  -4  15    9.20    2.00
  -4  -4  15    4.60    1.60
  -4  -4  15    4.70    1.70
  -4  -4  15    7.40    1.60
   5  -4  15  366.66   17.70
  -5   4  15  341.17   17.90
  -5  -4  15  360.26   16.80
  -5  -4  15  377.76   17.50
   6  -4  15   26.00    2.90
  -6   4  15   21.60    3.00
  -6  -4  15   24.50    2.90
   0  -5  15   47.90    4.50
   0   5  15   48.40    4.80
   0   5 -15   54.29    6.90
   1  -5  15   91.19    6.90
   1  -5  15   91.99    6.40
  -1   5  15   90.39    6.90
   1   5 -15   91.89    9.10
  -1  -5  15  102.99    7.00
   1   5  15   90.09    6.60
  -1  -5  15   88.89    6.60
   2  -5  15  135.49    7.50
  -2   5  15  129.09    8.50
   2  -5  15  129.19    8.60
   2   5 -15  134.29   10.90
  -2  -5  15  127.09    8.10
  -2  -5  15  127.29    8.40
  -2  -5  15  119.69    7.40
   3  -5  15   58.19    5.30
  -3   5  15   57.29    5.10
   3   5 -15   59.89    6.50
  -3  -5  15   56.59    4.50
  -3  -5  15   57.09    5.10
  -3  -5  15   60.19    4.50
   4  -5  15   71.59    4.80
   4   5 -15   56.09    5.80
  -4   5  15   82.69    5.60
   4  -5  15   65.49    5.50
  -4  -5  15   68.39    4.90
  -4  -5  15   69.69    4.60
  -4  -5  15   66.19    5.30
  -5   5  15    2.70    1.20
   5   5 -15   -1.50    3.20
   5  -5  15    0.70    1.20
  -5  -5  15    0.30    0.80
  -5  -5  15    1.60    1.10
  -6   5  15   60.39    3.70
   6  -5  15   63.89    4.30
  -6  -5  15   64.29    3.90
  -6  -5  15   62.69    4.10
   6  -5 -15   56.29    4.50
   0  -6  15   22.20    3.00
   0   6  15   16.60    3.00
   1   6 -15   50.59    6.50
   1  -6  15   49.70    4.30
  -1   6  15   47.40    4.70
   1   6  15   50.79    5.10
  -1  -6  15   45.60    4.40
  -1  -6  15   50.39    4.40
   2   6 -15   20.70    4.10
  -2   6  15   25.10    3.30
   2  -6  15   25.30    3.30
   2  -6  15   17.80    2.70
  -2  -6  15   22.70    3.10
  -2   6 -15   22.90    4.40
  -2  -6  15   24.10    2.80
  -2  -6  15   17.10    2.60
  -3   6  15    1.60    1.20
   3  -6  15    0.90    1.20
   3   6 -15   -1.60    1.90
  -3  -6  15    1.00    1.40
  -3  -6  15    0.40    1.00
  -3  -6  15    0.90    1.20
   4  -6  15   35.40    3.60
   4  -6  15   31.60    3.40
  -4   6  15   31.80    3.50
   4   6 -15   44.50    5.80
  -4  -6  15   33.70    3.70
  -4  -6  15   33.10    3.40
   5  -6  15   46.20    3.50
  -5   6  15   44.00    3.30
  -5  -6  15   40.50    3.10
  -5   6 -15   38.30    4.00
  -5  -6  15   42.90    3.40
   0   7  15   36.10    3.80
   0   7 -15   42.60    5.30
   0  -7  15   45.00    4.70
  -1   7  15  235.48   11.50
   1   7 -15  221.48   14.00
   1  -7  15  224.08   10.80
   1   7  15  180.58   10.90
  -1  -7  15  180.68   13.60
  -1   7 -15  225.08   14.10
  -2   7  15    4.40    1.40
   2  -7  15    7.60    2.10
   2   7 -15    2.60    2.00
  -2   7 -15    4.50    2.10
  -2  -7  15    3.10    1.10
  -2  -7  15    4.00    1.50
   3   7 -15   45.70    4.90
   3  -7  15   46.60    4.20
  -3   7  15   44.80    3.90
  -3  -7  15   46.10    3.40
  -3  -7  15   43.30    3.80
  -3  -7  15   43.70    3.20
  -3   7 -15   42.40    4.80
   4  -7  15   50.69    3.20
   4   7 -15   54.19    4.50
   4  -7  15   47.70    3.40
  -4   7  15   50.99    3.90
  -4  -7  15   50.99    3.80
  -4   7 -15   55.69    5.30
  -4  -7  15   48.60    3.40
   0   8 -15    2.60    1.50
   0  -8  15    1.00    0.60
   0   8  15    1.20    1.50
   0  -8  15    0.00    1.00
   1   8 -15  212.28   12.30
   1  -8  15  175.48   10.40
  -1   8  15  201.18   11.00
  -1   8 -15  207.98   12.20
  -1  -8  15  186.88    9.90
  -1  -8  15  235.58   11.20
  -2   8  15   39.70    3.50
   2   8 -15   51.29    4.90
  -2  -8  15   55.09    3.90
  -2  -8  15   49.40    3.20
  -2   8 -15   49.99    4.80
   3  -8  15  173.98    8.30
   3   8 -15  189.68    9.80
  -3   8  15  167.88    8.60
  -3   8 -15  174.98    9.60
  -3  -8  15  166.98    8.90
   0   0  16   32.40    5.00
   0   0 -16   31.40    7.30
   0   0  16   37.10    4.30
   1   0  16  564.34   25.50
  -1   0  16  557.34   25.80
   1   0 -16  520.65   29.40
  -1   0  16  563.34   25.60
  -1   0 -16  499.35   30.00
  -2   0  16  188.98   12.90
   2   0  16  172.58   11.60
  -2   0  16  173.88   10.60
   3   0  16    1.50    1.60
  -3   0  16   -0.60    1.30
  -3   0  16    0.20    2.20
  -3   0  16    1.20    1.20
   3   0  16    1.30    1.50
  -4   0  16  162.58   10.30
   4   0  16  163.18    9.80
  -4   0  16  156.98    9.50
  -4   0  16  167.18    9.40
   5   0  16   -0.50    1.30
  -5   0  16    0.20    1.50
  -5   0  16   -1.10    1.30
  -6   0  16   18.20    2.90
  -6   0  16   18.50    2.80
  -6   0  16   20.20    2.80
  -7   0  16  123.69    6.50
   0   1  16  158.68   10.00
   0  -1  16  174.78   10.00
   0   1 -16  153.38   14.00
   0  -1 -16  139.89   13.80
   0  -1  16  162.68   10.10
   1  -1  16  241.48   13.20
   1  -1  16  237.78   12.80
   1   1 -16  228.28   15.10
  -1  -1 -16  209.88   17.90
  -1   1  16  224.28   12.70
   1   1 -16  210.08   16.70
  -1   1  16  227.28   13.10
   1   1  16  238.88   13.00
  -1  -1  16  217.88   12.70
  -1  -1  16  238.48   12.80
  -1   1 -16  225.18   17.70
   1  -1 -16  188.88   22.50
   2  -1  16   46.60    5.80
  -2   1  16   39.60    4.70
  -2  -1  16   42.30    5.70
   2   1  16   43.50    5.40
  -3   1  16    2.70    2.00
  -3   1  16    2.50    1.30
   3  -1  16    7.80    2.10
  -3   1  16    3.70    2.40
   3  -1  16    4.10    1.70
   3   1  16    7.90    2.10
  -3  -1  16    1.70    1.40
  -3  -1  16    1.50    1.30
  -3  -1  16    5.10    2.70
  -4   1  16   87.19    6.20
  -4   1  16   89.39    6.60
  -4   1  16   85.59    6.90
   4  -1  16   94.59    6.90
  -4  -1  16   90.39    6.80
  -4  -1  16   83.89    6.30
  -4  -1  16   84.19    6.00
   5  -1  16   60.89    5.30
  -5   1  16   57.19    5.70
  -5   1  16   50.39    5.20
  -5   1  16   59.99    5.80
  -5  -1  16   58.09    6.10
  -5  -1  16   58.99    4.40
  -5  -1  16   55.79    5.00
   6  -1  16   68.39    4.60
  -6   1  16   72.69    5.10
  -6   1  16   69.49    4.50
  -6  -1  16   71.59    4.90
  -6  -1  16   70.09    5.20
   0   2  16  124.59    8.50
   0  -2  16  141.29   11.20
   0  -2  16  127.49    8.60
  -1   2  16   27.60    7.10
   1  -2  16   24.10    3.60
   1  -2  16   23.70    3.60
  -1   2  16   23.70    3.70
  -1  -2  16   29.40    3.50
   1   2  16   29.80    5.00
  -2   2  16   50.79    5.60
   2   2 -16   51.89    6.80
  -2   2  16   54.49    5.20
   2  -2  16   61.69    5.30
   2  -2  16   51.59    5.30
  -2  -2  16   54.39    5.00
  -2  -2  16   51.29    5.30
   2   2  16   52.59    4.80
   3  -2  16  104.39    7.00
   3  -2  16  102.79    7.70
  -3   2  16  102.29    7.20
  -3   2  16  100.49    8.00
  -3   2  16  108.19    7.60
  -3  -2  16  101.79    7.00
  -3  -2  16  102.59    6.80
  -3  -2  16  104.49    7.60
   4  -2  16   37.50    5.10
   4  -2  16   53.29    5.10
  -4   2  16   55.69    5.00
  -4   2  16   49.60    4.50
  -4  -2  16   53.89    4.70
  -4  -2  16   51.09    4.90
  -4  -2  16   52.69    4.30
   5  -2  16   50.69    4.90
  -5   2  16   46.60    4.40
  -5   2  16   56.59    4.90
  -5  -2  16   44.50    3.70
  -5  -2  16   39.80    4.20
  -5  -2  16   45.80    4.00
  -6   2  16    8.60    2.40
   6  -2  16   13.50    2.40
  -6   2  16   18.50    2.10
  -6  -2  16   10.60    2.70
  -6  -2  16   17.10    2.50
   0   3  16   -0.80    1.10
   0  -3  16    2.50    1.90
  -1   3  16  105.19    7.50
   1  -3  16   82.39   12.40
   1  -3  16  105.79    7.50
   1  -3  16  106.09    7.60
   1  -3  16  107.09    7.10
   1   3 -16   96.29    9.40
   1   3  16  115.39    7.50
  -1  -3  16  101.09    7.50
  -1  -3  16  101.29    7.20
   2  -3  16  145.99    9.40
   2  -3  16  147.39    8.90
   2   3 -16  140.19   11.00
  -2   3  16  144.79    9.10
  -2  -3  16  139.39    8.70
  -2  -3  16  129.39    8.80
   2   3  16  139.79    8.50
  -3   3  16  129.49    8.40
   3   3 -16  122.79    9.70
  -3   3  16  126.19    8.10
   3  -3  16  112.39    8.20
   3  -3  16  125.79    7.70
  -3  -3  16  111.69    7.30
  -3  -3  16  115.49    7.20
  -3  -3  16  115.39    8.10
  -4   3  16   19.30    2.90
   4  -3  16   21.00    2.60
   4  -3  16   17.80    3.40
  -4   3  16   12.30    3.00
  -4  -3  16   16.20    2.60
  -4  -3  16   19.60    3.40
  -4  -3  16   22.70    3.10
  -5   3  16   77.89    5.80
   5  -3  16   81.29    5.90
  -5   3  16   81.29    5.40
  -5  -3  16   70.79    5.40
  -5  -3  16   78.99    5.30
  -5  -3  16   95.29    6.80
   6  -3  16   28.00    2.70
  -6   3  16   25.40    2.30
  -6  -3  16   26.70    2.90
  -6  -3  16   27.10    2.90
   0   4  16  137.19    9.00
   0   4 -16  141.79   11.70
   0  -4  16  138.19    8.60
   0  -4  16  147.19    9.10
  -1   4  16  111.09    7.80
   1  -4  16  109.89    7.20
   1   4 -16  117.29   10.10
   1  -4  16  114.99    7.90
   1  -4  16  121.29    7.80
  -1  -4  16  100.89    7.40
   1   4  16  113.89    7.60
  -1  -4  16  115.59    7.70
   2  -4  16  195.88   10.80
   2  -4  16  184.38   11.10
   2   4 -16  195.68   13.40
  -2   4  16  187.78   11.00
  -2  -4  16  180.38   10.40
  -2  -4  16  196.78   11.10
   2   4  16  187.48   10.00
  -3   4  16   45.80    4.50
   3  -4  16   50.79    4.30
   3  -4  16   40.80    4.30
   3   4 -16   38.10    6.10
  -3  -4  16   44.30    4.40
  -3  -4  16   46.10    4.00
  -3  -4  16   47.20    4.00
   4   4 -16   44.50    7.60
   4  -4  16   36.20    4.00
  -4   4  16   32.30    3.50
   4  -4  16   35.50    3.20
  -4  -4  16   31.30    3.70
  -4  -4  16   35.10    3.20
  -4  -4  16   39.50    3.50
  -5   4  16   58.09    4.40
   5  -4  16   65.49    4.90
  -5  -4  16   57.99    4.60
  -5  -4  16   64.29    4.70
  -6   4  16   38.60    3.60
   6  -4 -16   41.70    3.20
  -6  -4  16   43.90    3.10
  -6  -4  16   47.00    3.50
   0  -5  16   53.49    4.80
   0   5 -16   60.29    7.00
   0  -5  16   58.29    4.80
   0   5  16   54.99    5.00
   1   5 -16  267.57   16.80
  -1   5  16  252.97   13.80
   1  -5  16  268.27   13.70
   1  -5  16  258.27   13.10
  -1  -5  16  259.17   13.50
   1   5  16  277.77   13.40
  -1  -5  16  271.07   13.70
   2   5 -16  103.09    9.00
   2  -5  16  105.39    7.10
   2  -5  16   98.59    6.80
  -2   5  16  100.79    7.00
  -2  -5  16  109.89    6.80
  -2  -5  16  103.39    7.00
   3  -5  16    2.80    1.40
   3  -5  16    5.20    1.70
  -3   5  16    6.20    1.90
   3   5 -16    4.00    2.50
  -3  -5  16    4.20    1.40
  -3  -5  16    6.20    2.00
  -3  -5  16    5.50    3.10
   4  -5  16  163.48    9.10
  -4   5  16  152.88    8.60
   4  -5  16  159.88    8.30
  -4  -5  16  152.08    7.90
  -4  -5  16  161.28    8.80
  -4  -5  16  143.69    8.20
  -5   5  16   22.90    2.40
   5  -5  16   27.50    2.90
  -5  -5  16   24.10    2.40
  -5  -5  16   26.60    2.70
   0   6  16  112.39    7.20
   0  -6  16  102.19    7.00
   0   6 -16  117.09    9.60
   0  -6  16  133.69    8.70
  -1   6  16   36.60    5.00
   1  -6  16   31.20    3.40
   1  -6  16   34.80    3.20
   1   6 -16   36.20    5.00
  -1  -6  16   33.10    3.80
  -1   6 -16   35.10    5.10
  -1  -6  16   31.00    3.20
   1   6  16   32.50    4.60
   2   6 -16   19.90    3.90
  -2   6  16   12.50    3.00
   2  -6  16   22.90    3.90
  -2  -6  16   18.30    3.20
  -2   6 -16   17.80    4.90
  -2  -6  16   20.30    2.40
   3  -6  16   38.40    3.30
   3  -6  16   42.70    3.60
  -3   6  16   41.60    3.80
   3   6 -16   49.40    5.20
  -3  -6  16   38.40    3.70
  -3   6 -16   40.90    4.80
  -3  -6  16   32.20    3.10
   4  -6  16  105.69    5.60
   4   6 -16  121.19    6.90
   4  -6  16  110.39    6.40
  -4   6 -16  115.69    8.60
  -4  -6  16  103.59    6.40
   0  -7  16  293.17   15.20
   0   7 -16  323.67   18.00
   0  -7  16  367.56   16.40
   0   7  16  362.86   17.20
   1  -7  16   15.70    2.50
  -1   7  16   16.70    2.90
   1   7 -16   17.00    3.30
   1  -7  16   18.00    2.20
  -1  -7  16   16.90    2.20
  -1  -7  16   19.30    2.30
  -1   7 -16   17.90    3.40
   2  -7  16  126.29    7.10
   2   7 -16  126.69   10.40
  -2  -7  16  136.99    7.30
  -2   7 -16  135.09    9.30
  -2  -7  16  130.09    6.80
  -3   7  16   14.60    2.10
   3   7 -16   13.90    2.80
   3  -7  16   16.00    2.30
  -3   7 -16   17.40    2.90
  -3  -7  16   13.60    2.00
   0   8 -16   32.40    4.00
   0  -8  16   29.10    2.50
   0  -8  16   33.20    3.10
   1  -8  16   47.10    3.90
   1   8 -16   54.29    5.10
  -1  -8  16   41.30    2.90
  -1   8 -16   45.20    4.80
  -1  -8  16   46.60    3.20
   0   0  17    4.60    2.70
  -1   0  17  120.59    8.50
   1   0  17  129.99    8.40
  -1   0  17  133.79    8.60
  -2   0  17   11.70    2.90
   2   0  17   18.50    3.00
  -2   0  17   15.80    2.70
   3   0  17  118.89    7.00
  -3   0  17  110.69    8.00
  -3   0  17  112.49    7.40
  -4   0  17    2.20    1.00
  -4   0  17   -0.70    1.40
  -4   0  17   -1.10    1.70
  -5   0  17   17.30    2.80
  -5   0  17   21.10    2.40
  -5   0  17   18.10    3.30
  -6   0  17   11.40    1.90
   0  -1  17  441.06   20.90
   0   1  17  449.26   21.60
   0  -1  17  454.65   21.50
  -1   1  17  187.18   11.30
  -1   1  17  205.98   11.60
   1  -1  17  202.98   11.40
   1   1 -17  193.48   13.00
   1   1  17  193.08   11.30
  -1  -1  17  196.98   11.40
  -1  -1  17  206.28   11.60
  -2   1  17  103.19    8.10
   2  -1  17  127.49    8.30
   2  -1  17  124.49    7.90
  -2   1  17  128.49    8.20
  -2  -1  17  110.39    8.10
   2   1  17  120.29    7.70
  -2  -1  17  116.39    7.80
   3  -1  17   14.40    2.40
   3  -1  17   20.90    3.00
  -3   1  17   23.20    3.20
  -3   1  17   22.10    3.70
  -3   1  17   14.40    4.20
   3   1  17   21.00    3.80
  -3  -1  17   20.70    3.70
  -3  -1  17   22.80    3.00
  -4   1  17  161.78    8.90
   4  -1  17  151.08    9.00
  -4   1  17  147.99    9.40
  -4   1  17  156.48    8.80
  -4  -1  17  149.49    8.50
  -4  -1  17  154.78    8.50
  -4  -1  17  151.88    9.30
   5  -1  17    6.40    1.50
  -5   1  17    5.30    1.40
  -5  -1  17    5.10    1.90
  -5  -1  17    8.80    2.60
  -6   1  17  134.39    7.00
  -6  -1  17  135.19    6.90
   0  -2  17    4.80    2.10
   0   2  17    0.50    1.30
   0  -2  17    3.10    1.30
   1   2 -17   15.90    3.90
  -1   2  17   16.60    2.80
   1  -2  17   13.90    2.90
   1   2  17   16.30    2.90
  -1  -2  17   12.20    2.50
  -1  -2  17   10.00    2.30
   2   2 -17   48.20    8.10
  -2   2  17   50.49    4.90
   2  -2  17   63.39    5.00
   2  -2  17   46.90    4.70
   2   2  17   51.09    4.40
  -2  -2  17   55.09    4.80
  -2  -2  17   49.80    4.90
   3  -2  17   82.59    5.50
  -3   2  17   77.29    6.00
   3  -2  17   82.29    6.30
  -3  -2  17   78.29    6.10
  -3  -2  17   77.09    5.60
   4  -2  17   46.80    4.30
  -4   2  17   40.20    4.30
  -4   2  17   50.69    4.20
   4  -2  17   56.19    6.00
  -4  -2  17   50.09    4.50
  -4  -2  17   48.60    4.30
  -4  -2  17   44.70    4.10
  -5   2  17   43.80    4.00
  -5   2  17   44.90    3.60
   5  -2  17   48.50    3.90
  -5  -2  17   38.80    3.60
  -5  -2  17   52.29    3.60
  -5  -2  17   48.20    4.10
  -6  -2  17   26.40    2.50
   0  -3  17   70.09    5.60
   0   3  17   67.69    5.80
   0  -3  17   74.69    5.60
   0   3 -17   65.69    7.40
  -1   3  17   65.69    5.60
   1   3 -17   55.09    6.60
   1  -3  17   65.89    5.30
  -1  -3  17   59.99    5.00
  -1  -3  17   64.19    5.50
   1   3  17   64.99    5.50
  -2   3  17   69.49    5.80
   2   3 -17   74.99    8.10
   2  -3  17   76.29    6.00
   2  -3  17   72.49    5.60
  -2  -3  17   75.39    5.60
  -2  -3  17   71.69    5.80
  -3   3  17  141.49    8.50
   3  -3  17  142.19    8.70
   3  -3  17  151.98    9.10
  -3  -3  17  125.29    7.80
  -3  -3  17  125.69    8.30
  -4   3  17   39.30    4.00
   4  -3  17   37.60    4.10
   4  -3  17   37.90    4.60
  -4  -3  17   30.20    2.90
  -4  -3  17   32.70    6.20
  -4  -3  17   28.30    3.30
  -5   3  17    8.20    1.70
   5  -3  17    8.80    1.70
  -5  -3  17   10.10    2.00
  -5  -3  17    7.70    1.90
   0   4 -17    1.50    1.80
   0   4  17    0.80    1.30
   0  -4  17    1.90    1.30
   0  -4  17    2.30    1.40
   1  -4  17  126.49    8.00
   1  -4  17  119.49    7.20
   1   4 -17  123.39   10.20
  -1   4  17  130.39    8.20
  -1   4 -17  131.99   10.70
   1   4  17  121.79    7.80
  -1  -4  17  124.89    7.80
  -1  -4  17  139.09    8.10
  -2   4  17  360.26   17.70
   2  -4  17  357.26   17.80
   2   4 -17  429.06   21.40
   2  -4  17  376.96   17.50
  -2  -4  17  361.46   17.60
   2   4  17  341.97   17.50
  -2  -4  17  348.77   17.10
   3  -4  17    6.10    1.80
  -3   4  17    4.10    1.60
   3  -4  17    4.70    1.30
  -3  -4  17    3.60    1.30
  -3  -4  17    3.20    1.80
   4  -4  17   34.50    2.80
   4  -4  17   34.10    3.40
  -4   4  17   30.10    3.20
  -4  -4  17   29.30    3.20
  -4  -4  17   32.90    3.40
  -4  -4  17   36.00    3.10
   5  -4  17   51.59    3.70
  -5   4  17   36.90    3.80
  -5  -4  17   44.80    3.60
  -5  -4  17   43.10    4.30
   0   5 -17   31.00    4.70
   0  -5  17   33.00    3.60
   0   5  17   26.10    3.40
   0  -5  17   32.30    3.40
   1  -5  17   19.70    3.10
   1  -5  17   24.30    2.90
   1   5 -17   24.20    6.80
  -1   5  17   21.70    4.10
  -1   5 -17   25.10    4.00
  -1  -5  17   27.10    3.70
  -1  -5  17   25.70    2.90
   1   5  17   29.90    3.10
   2   5 -17   41.20    4.90
  -2   5  17   43.00    4.80
   2  -5  17   41.60    3.70
  -2  -5  17   38.40    3.50
  -2  -5  17   37.40    3.60
   3   5 -17  112.19    9.00
   3  -5  17  102.49    6.50
   3  -5  17  113.09    6.10
  -3   5  17  104.49    6.50
  -3  -5  17   96.69    6.40
  -3  -5  17  102.59    7.30
   4  -5  17   93.49    6.30
   4  -5  17   82.49    5.10
  -4   5  17   90.79    6.00
   0  -6  17   11.70    2.00
   0   6 -17   15.40    3.20
   0   6  17   13.60    2.40
   0  -6  17   19.70    2.80
   1  -6  17   24.20    2.70
   1  -6  17   26.10    2.90
   1   6 -17   24.20    3.80
  -1   6  17   27.90    3.20
  -1  -6  17   29.70    3.10
  -1  -6  17   23.60    2.60
  -1   6 -17   24.60    4.00
  -2   6  17   13.80    2.40
   2  -6  17   14.90    2.00
   2   6 -17   15.90    3.30
  -2  -6  17   14.30    2.10
  -2   6 -17   19.50    3.30
   3  -6  17    6.80    1.40
   3   6 -17    4.20    1.80
  -3   6  17    5.00    1.30
  -3  -6  17    4.80    1.10
  -3  -6  17    5.30    1.40
   0  -7  17  262.07   12.50
   0   7 -17  280.87   14.80
   0  -7  17  292.57   12.40
   1   7 -17   14.10    2.90
   1  -7  17   17.00    2.00
  -1   7  17   17.20    2.20
  -1   7 -17   15.80    3.20
  -1  -7  17   13.70    2.00
   2  -7  17  127.49    6.40
  -2   7  17  105.19    6.30
   2   7 -17  125.89    7.50
  -2   7 -17  148.89    8.90
  -2  -7  17  131.99    6.60
  -2  -7  17  114.49    6.30
   0   0  18  384.26   18.70
  -1   0  18    6.80    1.80
   1   0  18    3.20    1.80
  -1   0  18    5.40    2.20
  -2   0  18  102.29    7.20
  -2   0  18  104.39    7.00
   2   0  18  112.79    6.80
   3   0  18   34.00    4.40
  -3   0  18   33.40    3.50
  -3   0  18   30.00    4.10
  -4   0  18   53.29    6.20
  -4   0  18   68.79    4.60
  -4   0  18   67.19    5.20
  -5   0  18    1.60    1.10
   0   1 -18    8.90    5.50
   0  -1  18    6.50    2.00
   0  -1  18    4.90    2.30
   0   1  18    6.80    1.90
  -1   1  18   95.79    6.70
   1  -1  18   93.19    6.50
  -1  -1  18   84.49    6.40
  -1  -1  18   89.79    6.50
   1   1  18   93.79    6.50
  -2   1  18   83.29    7.00
  -2   1  18  104.89    6.90
   2  -1  18  106.09    6.50
  -2  -1  18  100.49    6.80
  -2  -1  18   97.59    6.90
   2   1  18   98.79    7.50
  -3   1  18   20.60    4.40
  -3   1  18   25.70    3.10
   3  -1  18   25.30    2.80
  -3  -1  18   27.50    4.10
  -3  -1  18   22.00    2.80
  -4   1  18   42.60    3.60
  -4  -1  18   38.30    3.30
  -4  -1  18   40.20    4.00
  -5   1  18   75.69    4.40
  -5  -1  18   78.09    5.30
  -5  -1  18   76.49    4.40
   0  -2  18   36.70    4.20
   0  -2  18   40.70    4.20
   0   2 -18   36.00    5.40
   0   2  18   45.00    4.40
  -1   2  18   27.40    3.40
   1   2 -18   22.10    4.70
   1  -2  18   31.40    3.40
  -1  -2  18   22.80    3.20
   1   2  18   28.70    3.20
  -1  -2  18   23.50    3.20
   2  -2  18  149.69    8.30
  -2   2  18  149.09    8.80
  -2  -2  18  131.09    8.40
   2   2  18  142.89    7.90
  -2  -2  18  135.59    8.20
  -3   2  18  125.29    7.50
   3  -2  18  126.39    6.90
  -3  -2  18  102.89    8.40
  -3  -2  18  137.59    8.70
  -4   2  18  128.69    7.10
  -4  -2  18  111.19    7.10
  -4  -2  18  123.99    7.50
  -5   2  18    5.30    1.10
  -5  -2  18    6.10    1.60
   0   3  18  124.89    7.80
   0  -3  18  116.09    7.00
   0  -3  18  118.19    7.40
   1  -3  18   97.69    6.30
   1   3 -18   81.29    7.70
  -1   3  18   86.49    6.40
  -1  -3  18   89.19    6.20
  -1   3 -18   89.29    8.00
  -1  -3  18  109.29    7.10
   1   3  18   89.29    7.70
  -2   3  18   74.49    5.60
   2   3 -18   70.99    7.70
   2  -3  18   82.59    7.10
  -2  -3  18   89.09    6.40
  -2  -3  18   83.39    5.60
   2   3  18   74.79    5.50
   3  -3  18   77.89    5.90
  -3   3  18   77.69    5.40
  -3  -3  18   75.69    5.40
  -3  -3  18   74.69    5.10
   4  -3  18  123.69    6.80
  -4   3  18  116.09    6.50
  -4  -3  18  112.89    6.70
  -4  -3  18   99.99    6.50
  -5   3  18   52.19    3.30
  -5  -3  18   57.39    3.90
   0  -4  18    5.90    1.60
   0   4 -18    8.70    2.80
   0  -4  18   10.50    3.30
   1   4 -18   -1.70    1.80
   1   4  18    0.00    1.20
  -1  -4  18    2.20    1.30
  -1  -4  18   -0.70    0.80
  -1   4 -18   -2.00    1.20
   2   4 -18  154.48   10.50
   2  -4  18  157.78    8.40
  -2   4  18  148.39    8.70
  -2   4 -18  160.68   11.00
  -2  -4  18  165.88    8.80
  -2  -4  18  148.79    8.30
   3  -4  18  182.28    8.50
  -3   4  18  172.48    9.10
  -3  -4  18  157.68    8.90
  -4   4  18   41.30    3.30
  -4  -4  18   40.40    3.30
   0   5 -18   30.10    4.50
   0  -5  18   26.20    2.80
   0   5  18   31.10    4.10
   0  -5  18   30.90    3.40
   1   5 -18   52.49    6.90
  -1   5  18   53.39    4.30
   1  -5  18   59.39    4.20
  -1  -5  18   71.99    5.10
  -1   5 -18   60.79    5.80
   1   5  18   52.09    3.90
   2  -5  18   57.19    5.10
  -2   5  18   60.79    4.40
   2   5 -18   66.09    5.20
  -2   5 -18   61.49    5.80
  -2  -5  18   65.19    4.70
  -2  -5  18   52.19    4.70
  -3  -5  18    1.20    0.80
  -3  -5  18    0.70    0.90
  -3   5 -18    1.40    1.40
   0  -6  18   54.69    3.80
   0   6 -18   57.59    5.10
   0   6  18   49.40    4.10
  -1   6  18   13.00    2.00
   1   6 -18   15.00    2.80
   1  -6  18   12.90    1.80
  -1  -6  18   15.50    2.00
  -1  -6  18   15.70    1.90
  -1   6 -18   14.70    2.80
   2   6 -18  186.78   10.40
   2  -6  18  169.78    7.90
  -2   6  18  149.88    8.00
  -2  -6  18  162.68    7.60
  -2  -6  18  165.58    8.00
  -2   6 -18  140.69   10.70
   0   0  19    1.00    1.20
  -1   0  19  161.28    9.30
   1   0  19  176.38   11.00
  -2   0  19  122.49    7.60
  -2   0  19   99.19    9.60
   2   0  19  137.99    7.10
  -3   0  19   21.00    3.30
  -3   0  19   26.70    2.70
  -4   0  19   50.99    3.60
   0  -1  19  121.59    7.40
   0   1  19  106.79    7.30
  -1   1  19  121.09    7.60
  -1  -1  19  119.09    8.50
   1   1  19  126.49    7.30
  -1  -1  19  128.39    7.60
  -1   1 -19  108.09    9.90
  -2   1  19  189.18   12.50
   2  -1  19  175.68    8.90
   2   1  19  162.98    9.80
  -2  -1  19  165.68    9.20
  -2  -1  19  157.38    9.80
   3  -1  19    9.30    1.60
  -3   1  19   14.70    2.30
  -3  -1  19    8.20    1.80
  -4   1  19   70.49    4.30
  -4  -1  19   60.69    4.40
  -4  -1  19   70.49    4.60
   0   2  19   -1.20    0.90
   0   2 -19    0.40    2.70
   0  -2  19   -0.50    1.30
  -1   2  19  137.19    9.20
   1  -2  19  133.09    7.60
  -1  -2  19  131.89    7.90
  -1   2 -19  124.89    9.10
  -1  -2  19  104.49    8.10
   1   2  19  144.39    7.70
   2  -2  19   44.40    3.60
  -2   2  19   46.30    4.00
   2   2  19   42.00    3.90
  -2  -2  19   44.70    4.00
  -2  -2  19   47.20    3.80
  -3   2  19   89.39    5.60
   3  -2  19   91.09    4.80
  -3  -2  19   89.09    5.40
  -4   2  19    1.10    1.00
  -4  -2  19    2.50    0.90
   0   3  19  155.28    8.30
   0  -3  19  139.59    8.10
   0   3 -19  143.89   10.40
   1   3 -19   53.09    5.40
   1  -3  19   65.79    4.60
  -1   3  19   52.09    4.50
  -1  -3  19   63.59    4.60
  -1   3 -19   65.89    6.10
  -1  -3  19   68.79    4.90
   1   3  19   62.89    4.60
   2  -3  19    3.00    1.50
  -2   3  19    2.10    1.10
  -2   3 -19    2.20    2.30
  -2  -3  19   -0.30    1.20
  -2  -3  19    1.30    0.90
   3  -3  19   98.89    5.00
  -3   3  19   94.19    6.80
  -3  -3  19   95.89    5.30
  -3  -3  19   86.19    5.50
  -4   3  19   17.40    2.00
   0   4  19    7.80    1.70
   0   4 -19    8.30    2.60
   0  -4  19    8.80    1.60
  -1   4  19   29.80    4.00
   1  -4  19   25.10    2.60
   1   4 -19   26.30    3.80
  -1  -4  19   23.90    2.60
   1   4  19   22.80    2.70
  -1   4 -19   24.50    3.60
  -1  -4  19   25.30    2.70
  -2   4  19  372.56   16.30
   2  -4  19  328.57   14.60
  -2   4 -19  310.47   16.70
  -2  -4  19  301.37   14.50
  -2  -4  19  335.97   15.10
  -3   4  19  184.98   10.00
  -3  -4  19  173.68    8.40
  -3   4 -19  165.88   10.00
  -3  -4  19  164.68    7.90
   0   5  19   17.90    2.40
   0   5 -19   14.00    3.10
   0  -5  19   13.30    1.80
   1   5 -19   24.20    4.30
  -1   5  19   15.60    2.00
   1  -5  19   16.00    2.10
  -1  -5  19   17.00    2.10
  -1   5 -19   16.80    2.90
   2  -5  19  109.39    5.50
  -2   5  19   95.99    5.70
  -2   5 -19  113.19    7.10
  -2  -5  19  102.79    5.40
  -2  -5  19  107.29    6.00
   0   0  20  614.64   26.30
   1   0  20    3.90    1.80
  -1   0  20    6.00    1.40
   2   0  20  107.29    5.60
  -3   0  20  101.59    5.60
   0   1  20  117.39    7.00
   0  -1  20  131.79    7.20
   1  -1  20  162.98    9.90
  -1  -1  20  142.99    7.90
   1   1  20  148.39    7.70
   2  -1  20   90.89    4.90
  -2  -1  20   84.89    5.60
  -3   1  20   98.59    5.90
  -3  -1  20   85.89    5.90
   0   2  20   12.60    2.10
   0  -2  20   15.20    2.00
   1  -2  20   48.10    3.60
  -1   2  20   38.60    4.40
   1   2  20   46.80    3.30
  -2   2  20   96.69    5.60
   2  -2  20   96.69    5.00
  -2  -2  20   93.49    6.10
  -2  -2  20   96.29    5.40
  -2   2 -20   86.59    6.40
  -3   2  20   16.70    1.80
  -3  -2  20   12.80    1.70
  -3   2 -20   10.40    2.70
   0   3  20   -0.50    0.90
   0  -3  20    2.90    1.10
   1  -3  20  184.18    8.60
  -1   3  20  176.58    8.90
  -1   3 -20  145.49   10.40
   2  -3  20   12.60    1.60
  -2   3 -20    9.70    2.50
  -2  -3  20   14.00    1.90
   0   4  20  105.99    6.60
   0  -4  20  145.29    6.70
  -1   0  21    0.00    0.80
   1   0  21   -0.30    1.30
   0   1  21   11.40    1.70
   0  -1  21    8.90    1.40
   1  -1  21  130.79    6.40
  -1   1  21  139.19    6.80
  -1  -1  21  128.69    6.60
   0   0   0    0.00    0.00

_computing_structure_solution     'SHELXT 2014/5 (Sheldrick, 2014)'
;
_shelx_hkl_checksum                     11569
