# Supplementary material for: Immunosuppressive Sesquiterpenoids from the Edible Mushroom Craterellus odoratus
Source: J Fungi (Basel). 2021 Dec 8;7(12):1052. doi: 10.3390/jof7121052 (PMC8707212; doi:10.3390/jof7121052)
Supplement: Supplementary file 1 [file jof-07-01052-s001.zip › compound 3_0m.cif]

data_global
_audit_creation_method                  'APEX3 v2018.1-0'

_publ_requested_journal                 ?

_publ_contact_author_name               ?
_publ_contact_author_address            
;
;
_publ_contact_author_email              ?
_publ_contact_author_fax                ?
_publ_contact_author_phone              ?

_publ_section_title                     
;
;
_publ_section_abstract                  
;
;
_publ_section_references                
;
;
_publ_section_comment                   
;
;

data_ldlb56
_chemical_name_systematic               ?
_chemical_name_common                   ?
_chemical_formula_moiety                'C15 H24 O4'
_chemical_formula_sum                   'C15 H24 O4'
_chemical_formula_iupac                 ?
_chemical_formula_weight                268.34
_chemical_absolute_configuration        ad

_chemical_melting_point                 ?

_space_group_crystal_system             monoclinic
_space_group_name_H-M_alt               'P 1 21 1'
_space_group_name_Hall                  'P 2yb'
loop_
    _space_group_symop_operation_xyz
    'x, y, z'
    '-x, y+1/2, -z'

_cell_length_a                          9.9718(3)
_cell_length_b                          7.2863(2)
_cell_length_c                          10.4844(3)
_cell_angle_alpha                       90
_cell_angle_beta                        111.5850(10)
_cell_angle_gamma                       90
_cell_volume                            708.35(4)
_cell_formula_units_Z                   2
_cell_measurement_reflns_used           9865
_cell_measurement_theta_min             4.5354
_cell_measurement_theta_max             72.4910
_cell_measurement_temperature           100.(2)

_exptl_crystal_description              block
_exptl_crystal_colour                   'clear light colourless'
_exptl_crystal_size_max                 0.500
_exptl_crystal_size_mid                 0.350
_exptl_crystal_size_min                 0.220
_exptl_crystal_density_diffrn           1.258
_exptl_crystal_density_meas             ?
_exptl_crystal_density_method           'not measured'
_exptl_crystal_F_000                    292

_exptl_absorpt_coefficient_mu           0.729
_exptl_absorpt_correction_type          Multi-Scan
_exptl_absorpt_process_details          
;
SADABS-2016/2 - Bruker AXS area detector scaling and absorption correction
;
_exptl_absorpt_correction_T_min         0.74
_exptl_absorpt_correction_T_max         0.86

_exptl_special_details                  
;
; 

_diffrn_ambient_temperature             100.(2)

_diffrn_source                          'Ius Diamond'
_diffrn_source_type                     Microfocus

_diffrn_radiation_type                  'Cu K\a'
_diffrn_radiation_wavelength            1.54178
_diffrn_radiation_monochromator         'Helixos MX multilayer Optic'

_diffrn_measurement_device_type         'Bruker D8 QUEST PHOTON II'
_diffrn_measurement_method              ?

_diffrn_detector_area_resol_mean        7.3910

_diffrn_reflns_number                   13370
_diffrn_reflns_av_R_equivalents         0.0334
_diffrn_reflns_av_unetI/netI            0.0254
_diffrn_reflns_theta_min                4.54
_diffrn_reflns_theta_max                72.48
_diffrn_reflns_theta_full               72.48
_diffrn_measured_fraction_theta_max     0.991
_diffrn_measured_fraction_theta_full    0.991
_diffrn_reflns_limit_h_min              -12
_diffrn_reflns_limit_h_max              12
_diffrn_reflns_limit_k_min              -9
_diffrn_reflns_limit_k_max              8
_diffrn_reflns_limit_l_min              -12
_diffrn_reflns_limit_l_max              12

_refine_special_details                 
;
;

_reflns_number_total                    2751
_reflns_number_gt                       2736
_reflns_threshold_expression            'I > 2\s(I)'

_refine_ls_structure_factor_coef        Fsqd
_refine_ls_matrix_type                  full
_refine_ls_R_factor_all                 0.0291
_refine_ls_R_factor_gt                  0.0290
_refine_ls_wR_factor_gt                 0.0749
_refine_ls_wR_factor_ref                0.0750
_refine_ls_goodness_of_fit_ref          1.039
_refine_ls_restrained_S_all             1.039
_refine_ls_number_reflns                2751
_refine_ls_number_parameters            180
_refine_ls_number_restraints            1
_refine_ls_number_constraints           ?
_refine_ls_hydrogen_treatment           mixed
_refine_ls_weighting_scheme             calc
_refine_ls_weighting_details            
    'w=1/[\s^2^(Fo^2^)+(0.0394P)^2^+0.1669P] where P=(Fo^2^+2Fc^2^)/3'

_atom_sites_solution_hydrogens          geom
_atom_sites_solution_primary            ?
_atom_sites_solution_secondary          ?

_refine_ls_shift/su_max                 0.000
_refine_ls_shift/su_mean                0.000
_refine_diff_density_max                0.236
_refine_diff_density_min                -0.148
_refine_ls_extinction_method            none
_refine_ls_extinction_coef              ?
_refine_ls_abs_structure_details        
;

Flack x determined using 1228 quotients [(I+)-(I-)]/[(I+)+(I-)]
(Parsons, Flack and Wagner, Acta Cryst. B69 (2013) 249-259).
;
_refine_ls_abs_structure_Flack          0.06(6)

loop_
    _atom_type_symbol
    _atom_type_description
    _atom_type_scat_dispersion_real
    _atom_type_scat_dispersion_imag
    _atom_type_scat_source
    C C 0.0181 0.0091 'International Tables Vol C Tables 4.2.6.8 and 6.1.1.4'
    H H 0.0000 0.0000 'International Tables Vol C Tables 4.2.6.8 and 6.1.1.4'
    O O 0.0492 0.0322 'International Tables Vol C Tables 4.2.6.8 and 6.1.1.4'

_computing_data_collection              'Bruker Instrument Service vV6.2.9'
_computing_cell_refinement              'SAINT V8.38A (Bruker AXS Inc., 2017)'
_computing_data_reduction               'SAINT V8.38A (Bruker AXS Inc., 2017)'
_computing_structure_solution           'SHELXT 2014/5 (Sheldrick, 2014)'
_computing_structure_refinement         'SHELXL-2017/1 (Sheldrick, 2017)'
_computing_molecular_graphics           'shelXle (C.B. Huebschle, rev 882)'
_computing_publication_material         ?

loop_
    _atom_site_type_symbol
    _atom_site_label
    _atom_site_fract_x
    _atom_site_fract_y
    _atom_site_fract_z
    _atom_site_U_iso_or_equiv
    _atom_site_adp_type
    _atom_site_calc_flag
    _atom_site_refinement_flags_adp
    _atom_site_refinement_flags_occupancy
    _atom_site_refinement_flags_posn
    _atom_site_occupancy
    _atom_site_disorder_assembly
    _atom_site_disorder_group
    O O1 0.58358(13) 0.3358(2) 0.28593(12) 0.0233(3) Uani d . . . 1 . .
    O O2 0.39423(13) 0.8207(2) 0.97815(13) 0.0244(3) Uani d . . . 1 . .
    H H22 0.3683(14) 0.833(4) 0.891(3) 0.037 Uiso calc U . R 1 . .
    O O3 0.34351(13) 0.3150(3) 0.21570(12) 0.0310(3) Uani d . . . 1 . .
    H H23 0.3491(4) 0.331(4) 0.134(3) 0.047 Uiso calc U . R 1 . .
    O O4 0.32510(13) 0.3283(2) 0.96034(11) 0.0195(3) Uani d . . . 1 . .
    H H24 0.413(3) 0.306(3) 0.9665(17) 0.029 Uiso calc U . R 1 . .
    C C1 0.47416(17) 0.3243(3) 0.31159(16) 0.0164(3) Uani d . . . 1 . .
    C C2 0.47634(17) 0.3179(2) 0.45446(15) 0.0151(3) Uani d . . . 1 . .
    C C3 0.35139(17) 0.3110(3) 0.47396(16) 0.0174(3) Uani d . . . 1 . .
    H H9 0.266504 0.310419 0.393524 0.021 Uiso calc U . R 1 . .
    C C4 0.32925(18) 0.3039(3) 0.60790(16) 0.0207(4) Uani d . . . 1 . .
    H H10 0.412237 0.362533 0.680201 0.025 Uiso calc U . R 1 . .
    H H5 0.324555 0.174335 0.634293 0.025 Uiso calc U . R 1 . .
    C C5 0.18986(17) 0.4027(2) 0.59752(16) 0.0151(3) Uani d . . . 1 . .
    H H3 0.110607 0.355975 0.515476 0.018 Uiso calc U . R 1 . .
    H H4 0.201339 0.534976 0.582542 0.018 Uiso calc U . R 1 . .
    C C6 0.14409(17) 0.3828(2) 0.72213(16) 0.0127(3) Uani d . . . 1 . .
    C C7 0.01476(17) 0.5148(2) 0.70259(17) 0.0143(3) Uani d . . . 1 . .
    H H17 -0.055159 0.523636 0.605763 0.017 Uiso calc U . R 1 . .
    C C8 -0.05579(18) 0.4735(2) 0.80737(17) 0.0166(4) Uani d . . . 1 . .
    H H18 -0.081975 0.342187 0.805537 0.02 Uiso calc U . R 1 . .
    H H2 -0.143113 0.549333 0.790005 0.02 Uiso calc U . R 1 . .
    C C9 0.06480(18) 0.5255(3) 0.94569(17) 0.0165(4) Uani d . . . 1 . .
    H H1 0.028791 0.613511 0.997592 0.02 Uiso calc U . R 1 . .
    H H19 0.102425 0.41527 1.002905 0.02 Uiso calc U . R 1 . .
    C C10 0.27803(19) 0.7449(3) 1.00968(18) 0.0210(4) Uani d . . . 1 . .
    H H21 0.21794 0.846679 1.021636 0.025 Uiso calc U . R 1 . .
    H H20 0.318455 0.678822 1.098186 0.025 Uiso calc U . R 1 . .
    C C11 0.18233(17) 0.6143(2) 0.90214(17) 0.0153(3) Uani d . . . 1 . .
    C C12 0.62291(17) 0.3206(3) 0.56682(16) 0.0197(3) Uani d . . . 1 . .
    H H7 0.613935 0.359631 0.652788 0.03 Uiso calc U . R 1 . .
    H H8 0.685355 0.406694 0.542724 0.03 Uiso calc U . R 1 . .
    H H6 0.665033 0.197387 0.578238 0.03 Uiso calc U . R 1 . .
    C C13 0.10824(19) 0.1821(2) 0.73708(18) 0.0185(4) Uani d . . . 1 . .
    H H11 0.021936 0.146658 0.65889 0.028 Uiso calc U . R 1 . .
    H H13 0.090324 0.166436 0.822288 0.028 Uiso calc U . R 1 . .
    H H12 0.189448 0.104479 0.73967 0.028 Uiso calc U . R 1 . .
    C C14 0.26206(17) 0.4628(2) 0.85610(16) 0.0143(3) Uani d . . . 1 . .
    H H14 0.340164 0.520483 0.831311 0.017 Uiso calc U . R 1 . .
    C C15 0.09125(18) 0.6965(2) 0.76094(17) 0.0160(3) Uani d . . . 1 . .
    H H16 0.023941 0.793014 0.766915 0.019 Uiso calc U . R 1 . .
    H H15 0.150882 0.742789 0.710385 0.019 Uiso calc U . R 1 . .

loop_
    _atom_site_aniso_label
    _atom_site_aniso_U_11
    _atom_site_aniso_U_22
    _atom_site_aniso_U_33
    _atom_site_aniso_U_12
    _atom_site_aniso_U_13
    _atom_site_aniso_U_23
    O1 0.0189(5) 0.0360(8) 0.0189(5) -0.0010(6) 0.0115(5) -0.0012(6)
    O2 0.0198(6) 0.0355(8) 0.0208(6) -0.0114(6) 0.0107(5) -0.0068(6)
    O3 0.0189(6) 0.0645(10) 0.0108(6) -0.0032(7) 0.0067(5) 0.0033(7)
    O4 0.0174(6) 0.0293(7) 0.0123(5) 0.0058(6) 0.0059(4) 0.0044(6)
    C1 0.0176(7) 0.0171(8) 0.0152(7) -0.0002(7) 0.0068(6) 0.0003(7)
    C2 0.0179(7) 0.0144(7) 0.0132(7) 0.0003(7) 0.0060(6) -0.0007(7)
    C3 0.0197(8) 0.0204(8) 0.0118(7) 0.0015(7) 0.0054(6) -0.0004(7)
    C4 0.0209(8) 0.0304(10) 0.0128(7) 0.0055(8) 0.0086(6) 0.0011(7)
    C5 0.0175(7) 0.0187(8) 0.0100(7) 0.0004(7) 0.0061(6) 0.0004(6)
    C6 0.0138(7) 0.0149(8) 0.0100(7) -0.0007(6) 0.0053(6) 0.0001(6)
    C7 0.0126(7) 0.0174(8) 0.0131(7) -0.0007(7) 0.0050(6) 0.0008(6)
    C8 0.0142(8) 0.0204(9) 0.0177(8) -0.0008(6) 0.0090(6) -0.0010(7)
    C9 0.0153(7) 0.0218(9) 0.0158(8) -0.0025(7) 0.0098(6) -0.0030(7)
    C10 0.0198(8) 0.0269(9) 0.0200(8) -0.0076(7) 0.0119(7) -0.0091(7)
    C11 0.0135(7) 0.0195(9) 0.0153(8) -0.0015(7) 0.0081(6) -0.0026(7)
    C12 0.0178(8) 0.0239(8) 0.0161(7) 0.0010(8) 0.0047(6) -0.0003(8)
    C13 0.0219(8) 0.0160(8) 0.0194(8) -0.0013(7) 0.0095(7) -0.0004(7)
    C14 0.0135(7) 0.0193(8) 0.0114(7) 0.0001(6) 0.0063(6) 0.0008(6)
    C15 0.0157(7) 0.0153(8) 0.0191(8) -0.0004(6) 0.0090(6) -0.0007(7)

_geom_special_details                   
;

All esds (except the esd in the dihedral angle between two l.s. planes)
are estimated using the full covariance matrix.  The cell esds are taken
into account individually in the estimation of esds in distances, angles
and torsion angles; correlations between esds in cell parameters are only
used when they are defined by crystal symmetry.  An approximate (isotropic)
treatment of cell esds is used for estimating esds involving l.s. planes.
;

loop_
    _geom_bond_atom_site_label_1
    _geom_bond_atom_site_label_2
    _geom_bond_site_symmetry_2
    _geom_bond_distance
    _geom_bond_publ_flag
    O1 C1 . 1.219(2) ?
    O2 C10 . 1.428(2) ?
    O2 H22 . 0.85(3) ?
    O3 C1 . 1.322(2) ?
    O3 H23 . 0.88(3) ?
    O4 C14 . 1.430(2) ?
    O4 H24 . 0.87(3) ?
    C1 C2 . 1.491(2) ?
    C2 C3 . 1.336(2) ?
    C2 C12 . 1.502(2) ?
    C3 C4 . 1.500(2) ?
    C3 H9 . 0.95 ?
    C4 C5 . 1.533(2) ?
    C4 H10 . 0.99 ?
    C4 H5 . 0.99 ?
    C5 C6 . 1.541(2) ?
    C5 H3 . 0.99 ?
    C5 H4 . 0.99 ?
    C6 C13 . 1.527(2) ?
    C6 C7 . 1.561(2) ?
    C6 C14 . 1.575(2) ?
    C7 C8 . 1.537(2) ?
    C7 C15 . 1.538(2) ?
    C7 H17 . 1.0 ?
    C8 C9 . 1.552(2) ?
    C8 H18 . 0.99 ?
    C8 H2 . 0.99 ?
    C9 C11 . 1.547(2) ?
    C9 H1 . 0.99 ?
    C9 H19 . 0.99 ?
    C10 C11 . 1.515(2) ?
    C10 H21 . 0.99 ?
    C10 H20 . 0.99 ?
    C11 C14 . 1.538(2) ?
    C11 C15 . 1.545(2) ?
    C12 H7 . 0.98 ?
    C12 H8 . 0.98 ?
    C12 H6 . 0.98 ?
    C13 H11 . 0.98 ?
    C13 H13 . 0.98 ?
    C13 H12 . 0.98 ?
    C14 H14 . 1.0 ?
    C15 H16 . 0.99 ?
    C15 H15 . 0.99 ?

loop_
    _geom_angle_atom_site_label_1
    _geom_angle_atom_site_label_2
    _geom_angle_atom_site_label_3
    _geom_angle_site_symmetry_1
    _geom_angle_site_symmetry_3
    _geom_angle
    _geom_angle_publ_flag
    C10 O2 H22 . . 109.5 ?
    C1 O3 H23 . . 109.5 ?
    C14 O4 H24 . . 109.5 ?
    O1 C1 O3 . . 123.18(14) ?
    O1 C1 C2 . . 122.72(14) ?
    O3 C1 C2 . . 114.10(13) ?
    C3 C2 C1 . . 119.04(13) ?
    C3 C2 C12 . . 125.00(14) ?
    C1 C2 C12 . . 115.97(14) ?
    C2 C3 C4 . . 127.68(14) ?
    C2 C3 H9 . . 116.2 ?
    C4 C3 H9 . . 116.2 ?
    C3 C4 C5 . . 111.05(14) ?
    C3 C4 H10 . . 109.4 ?
    C5 C4 H10 . . 109.4 ?
    C3 C4 H5 . . 109.4 ?
    C5 C4 H5 . . 109.4 ?
    H10 C4 H5 . . 108.0 ?
    C4 C5 C6 . . 116.06(13) ?
    C4 C5 H3 . . 108.3 ?
    C6 C5 H3 . . 108.3 ?
    C4 C5 H4 . . 108.3 ?
    C6 C5 H4 . . 108.3 ?
    H3 C5 H4 . . 107.4 ?
    C13 C6 C5 . . 109.30(13) ?
    C13 C6 C7 . . 112.96(13) ?
    C5 C6 C7 . . 108.60(13) ?
    C13 C6 C14 . . 112.89(13) ?
    C5 C6 C14 . . 111.37(13) ?
    C7 C6 C14 . . 101.49(12) ?
    C8 C7 C15 . . 100.06(13) ?
    C8 C7 C6 . . 111.04(14) ?
    C15 C7 C6 . . 102.31(12) ?
    C8 C7 H17 . . 114.0 ?
    C15 C7 H17 . . 114.0 ?
    C6 C7 H17 . . 114.0 ?
    C7 C8 C9 . . 102.65(13) ?
    C7 C8 H18 . . 111.2 ?
    C9 C8 H18 . . 111.2 ?
    C7 C8 H2 . . 111.2 ?
    C9 C8 H2 . . 111.2 ?
    H18 C8 H2 . . 109.1 ?
    C11 C9 C8 . . 103.71(13) ?
    C11 C9 H1 . . 111.0 ?
    C8 C9 H1 . . 111.0 ?
    C11 C9 H19 . . 111.0 ?
    C8 C9 H19 . . 111.0 ?
    H1 C9 H19 . . 109.0 ?
    O2 C10 C11 . . 114.42(13) ?
    O2 C10 H21 . . 108.7 ?
    C11 C10 H21 . . 108.7 ?
    O2 C10 H20 . . 108.7 ?
    C11 C10 H20 . . 108.7 ?
    H21 C10 H20 . . 107.6 ?
    C10 C11 C14 . . 115.31(14) ?
    C10 C11 C15 . . 117.19(15) ?
    C14 C11 C15 . . 99.62(12) ?
    C10 C11 C9 . . 112.40(13) ?
    C14 C11 C9 . . 109.12(14) ?
    C15 C11 C9 . . 101.70(13) ?
    C2 C12 H7 . . 109.5 ?
    C2 C12 H8 . . 109.5 ?
    H7 C12 H8 . . 109.5 ?
    C2 C12 H6 . . 109.5 ?
    H7 C12 H6 . . 109.5 ?
    H8 C12 H6 . . 109.5 ?
    C6 C13 H11 . . 109.5 ?
    C6 C13 H13 . . 109.5 ?
    H11 C13 H13 . . 109.5 ?
    C6 C13 H12 . . 109.5 ?
    H11 C13 H12 . . 109.5 ?
    H13 C13 H12 . . 109.5 ?
    O4 C14 C11 . . 112.62(13) ?
    O4 C14 C6 . . 113.73(13) ?
    C11 C14 C6 . . 104.04(13) ?
    O4 C14 H14 . . 108.8 ?
    C11 C14 H14 . . 108.8 ?
    C6 C14 H14 . . 108.8 ?
    C7 C15 C11 . . 94.48(13) ?
    C7 C15 H16 . . 112.8 ?
    C11 C15 H16 . . 112.8 ?
    C7 C15 H15 . . 112.8 ?
    C11 C15 H15 . . 112.8 ?
    H16 C15 H15 . . 110.3 ?

loop_
    _geom_torsion_atom_site_label_1
    _geom_torsion_atom_site_label_2
    _geom_torsion_atom_site_label_3
    _geom_torsion_atom_site_label_4
    _geom_torsion_site_symmetry_1
    _geom_torsion_site_symmetry_2
    _geom_torsion_site_symmetry_3
    _geom_torsion_site_symmetry_4
    _geom_torsion
    _geom_torsion_publ_flag
    O1 C1 C2 C3 . . . . 177.96(19) ?
    O3 C1 C2 C3 . . . . -2.5(3) ?
    O1 C1 C2 C12 . . . . -1.8(3) ?
    O3 C1 C2 C12 . . . . 177.71(18) ?
    C1 C2 C3 C4 . . . . -179.97(18) ?
    C12 C2 C3 C4 . . . . -0.2(3) ?
    C2 C3 C4 C5 . . . . 147.7(2) ?
    C3 C4 C5 C6 . . . . 172.01(15) ?
    C4 C5 C6 C13 . . . . -64.76(19) ?
    C4 C5 C6 C7 . . . . 171.59(14) ?
    C4 C5 C6 C14 . . . . 60.65(19) ?
    C13 C6 C7 C8 . . . . 46.91(18) ?
    C5 C6 C7 C8 . . . . 168.33(14) ?
    C14 C6 C7 C8 . . . . -74.24(15) ?
    C13 C6 C7 C15 . . . . 152.91(13) ?
    C5 C6 C7 C15 . . . . -85.67(14) ?
    C14 C6 C7 C15 . . . . 31.76(15) ?
    C15 C7 C8 C9 . . . . -41.42(16) ?
    C6 C7 C8 C9 . . . . 66.05(17) ?
    C7 C8 C9 C11 . . . . 7.20(17) ?
    O2 C10 C11 C14 . . . . 50.0(2) ?
    O2 C10 C11 C15 . . . . -66.7(2) ?
    O2 C10 C11 C9 . . . . 175.97(16) ?
    C8 C9 C11 C10 . . . . 155.54(15) ?
    C8 C9 C11 C14 . . . . -75.24(16) ?
    C8 C9 C11 C15 . . . . 29.37(16) ?
    C10 C11 C14 O4 . . . . 70.23(18) ?
    C15 C11 C14 O4 . . . . -163.42(13) ?
    C9 C11 C14 O4 . . . . -57.37(17) ?
    C10 C11 C14 C6 . . . . -166.16(14) ?
    C15 C11 C14 C6 . . . . -39.81(15) ?
    C9 C11 C14 C6 . . . . 66.24(16) ?
    C13 C6 C14 O4 . . . . 6.79(19) ?
    C5 C6 C14 O4 . . . . -116.61(15) ?
    C7 C6 C14 O4 . . . . 127.99(13) ?
    C13 C6 C14 C11 . . . . -116.10(15) ?
    C5 C6 C14 C11 . . . . 120.50(14) ?
    C7 C6 C14 C11 . . . . 5.10(15) ?
    C8 C7 C15 C11 . . . . 58.53(14) ?
    C6 C7 C15 C11 . . . . -55.80(13) ?
    C10 C11 C15 C7 . . . . -176.71(14) ?
    C14 C11 C15 C7 . . . . 58.22(14) ?
    C9 C11 C15 C7 . . . . -53.77(14) ?

loop_
    _geom_hbond_atom_site_label_D
    _geom_hbond_atom_site_label_H
    _geom_hbond_atom_site_label_A
    _geom_hbond_site_symmetry_A
    _geom_hbond_distance_DH
    _geom_hbond_distance_HA
    _geom_hbond_distance_DA
    _geom_hbond_angle_DHA
    _geom_hbond_publ_flag
    O2 H22 O1 2_656 0.85 2.08 2.8597(17) 150.7 ?
    O3 H23 O4 1_554 0.88 1.75 2.6171(16) 166.7 ?
    O4 H24 O2 2_647 0.87 1.79 2.6314(17) 160.4 ?

_shelx_res_file                         
;

TITL ldlb56_0m_a.res in P2(1)
    ldlb56_0m.res
    created by SHELXL-2017/1 at 10:04:54 on 28-Sep-2020
CELL 1.54178 9.9718 7.2863 10.4844 90.000 111.585 90.000
ZERR 2.00 0.0003 0.0002 0.0003 0.000 0.001 0.000
LATT -1
SYMM -x, y+1/2, -z
SFAC C H O
UNIT 30 48 8
LIST 4 ! automatically inserted. Change 6 to 4 for CHECKCIF!!
TEMP -173.120
SIZE 0.220 0.350 0.500
ACTA
EQIV $1 -x+1, y+1/2, -z+1
HTAB O2 O1_$1
EQIV $2 x, y, z-1
HTAB O3 O4_$2
EQIV $3 -x+1, y-1/2, -z+2
HTAB O4 O2_$3
L.S. 4
FMAP 2
PLAN -4 0 0.00
HTAB
BOND $H
CONF
WGHT    0.039400    0.166900
FVAR       2.32851
O1    3    0.583575    0.335776    0.285934    11.00000    0.01885    0.03601 =
         0.01889   -0.00125    0.01154   -0.00097
O2    3    0.394229    0.820730    0.978149    11.00000    0.01979    0.03546 =
         0.02084   -0.00683    0.01075   -0.01144
AFIX 148
H22   2    0.368305    0.832944    0.891453    11.00000   -1.50000
AFIX   0
O3    3    0.343511    0.315046    0.215700    11.00000    0.01888    0.06451 =
         0.01081    0.00332    0.00670   -0.00317
AFIX 148
H23   2    0.349103    0.330603    0.134429    11.00000   -1.50000
AFIX   0
O4    3    0.325100    0.328273    0.960342    11.00000    0.01744    0.02928 =
         0.01231    0.00437    0.00595    0.00579
AFIX 148
H24   2    0.413110    0.305805    0.966544    11.00000   -1.50000
AFIX   0
C1    1    0.474162    0.324280    0.311585    11.00000    0.01759    0.01709 =
         0.01519    0.00030    0.00684   -0.00025
C2    1    0.476343    0.317938    0.454457    11.00000    0.01791    0.01438 =
         0.01319   -0.00071    0.00597    0.00026
C3    1    0.351388    0.310978    0.473963    11.00000    0.01970    0.02041 =
         0.01180   -0.00036    0.00538    0.00153
AFIX  43
H9    2    0.266504    0.310419    0.393524    11.00000   -1.20000
AFIX   0
C4    1    0.329255    0.303941    0.607898    11.00000    0.02094    0.03039 =
         0.01277    0.00107    0.00860    0.00550
AFIX  23
H10   2    0.412237    0.362533    0.680201    11.00000   -1.20000
H5    2    0.324555    0.174335    0.634293    11.00000   -1.20000
AFIX   0
C5    1    0.189862    0.402684    0.597515    11.00000    0.01748    0.01867 =
         0.00998    0.00045    0.00612    0.00045
AFIX  23
H3    2    0.110607    0.355975    0.515476    11.00000   -1.20000
H4    2    0.201339    0.534976    0.582542    11.00000   -1.20000
AFIX   0
C6    1    0.144093    0.382803    0.722133    11.00000    0.01383    0.01495 =
         0.01000    0.00005    0.00527   -0.00074
C7    1    0.014756    0.514791    0.702587    11.00000    0.01264    0.01740 =
         0.01305    0.00076    0.00500   -0.00071
AFIX  13
H17   2   -0.055159    0.523636    0.605763    11.00000   -1.20000
AFIX   0
C8    1   -0.055793    0.473487    0.807372    11.00000    0.01422    0.02044 =
         0.01772   -0.00100    0.00902   -0.00078
AFIX  23
H18   2   -0.081975    0.342187    0.805537    11.00000   -1.20000
H2    2   -0.143113    0.549333    0.790005    11.00000   -1.20000
AFIX   0
C9    1    0.064802    0.525499    0.945688    11.00000    0.01527    0.02183 =
         0.01575   -0.00299    0.00978   -0.00246
AFIX  23
H1    2    0.028791    0.613511    0.997592    11.00000   -1.20000
H19   2    0.102425    0.415270    1.002905    11.00000   -1.20000
AFIX   0
C10   1    0.278030    0.744890    1.009679    11.00000    0.01978    0.02693 =
         0.02002   -0.00913    0.01187   -0.00762
AFIX  23
H21   2    0.217940    0.846679    1.021636    11.00000   -1.20000
H20   2    0.318455    0.678822    1.098186    11.00000   -1.20000
AFIX   0
C11   1    0.182329    0.614283    0.902138    11.00000    0.01348    0.01948 =
         0.01529   -0.00259    0.00805   -0.00153
C12   1    0.622908    0.320648    0.566821    11.00000    0.01777    0.02386 =
         0.01614   -0.00034    0.00467    0.00096
AFIX 137
H7    2    0.613935    0.359631    0.652788    11.00000   -1.50000
H8    2    0.685355    0.406694    0.542724    11.00000   -1.50000
H6    2    0.665033    0.197387    0.578238    11.00000   -1.50000
AFIX   0
C13   1    0.108239    0.182122    0.737084    11.00000    0.02185    0.01597 =
         0.01935   -0.00045    0.00953   -0.00133
AFIX 137
H11   2    0.021936    0.146658    0.658890    11.00000   -1.50000
H13   2    0.090324    0.166436    0.822288    11.00000   -1.50000
H12   2    0.189448    0.104479    0.739670    11.00000   -1.50000
AFIX   0
C14   1    0.262058    0.462751    0.856097    11.00000    0.01349    0.01930 =
         0.01141    0.00079    0.00628    0.00008
AFIX  13
H14   2    0.340164    0.520483    0.831311    11.00000   -1.20000
AFIX   0
C15   1    0.091255    0.696489    0.760936    11.00000    0.01571    0.01525 =
         0.01914   -0.00068    0.00899   -0.00040
AFIX  23
H16   2    0.023941    0.793014    0.766915    11.00000   -1.20000
H15   2    0.150882    0.742789    0.710385    11.00000   -1.20000

AFIX   0
HKLF 4 1 1 0 0 0 1 0 0 0 1


REM  ldlb56_0m_a.res in P2(1)
REM R1 =  0.0290 for    2736 Fo > 4sig(Fo)  and  0.0291 for all    2751 data
REM    180 parameters refined using      1 restraints

END

WGHT      0.0394      0.1669

REM Instructions for potential hydrogen bonds
HTAB O2 O1_$1
HTAB O3 O4_$2
HTAB O4 O2_$3

REM Highest difference peak  0.236,  deepest hole -0.148,  1-sigma level  0.032
Q1    1   0.2051  0.4098  0.7823  11.00000  0.05    0.24
Q2    1   0.4827  0.3229  0.3911  11.00000  0.05    0.21
Q3    1   0.2213  0.6823  0.9492  11.00000  0.05    0.19
Q4    1   0.1421  0.6590  0.8363  11.00000  0.05    0.18
;
_shelx_res_checksum                     83197

_shelx_hkl_file                         
;
   1   0   0  915.51   38.90
  -1   0   0 1032.50   40.70
  -2   0   0    4.90    1.80
   2   0   0    7.40    0.90
   4   0   0 5304.37  209.78
   4   0   0 5393.76  208.58
  -4   0   0 5358.76  216.78
  -4   0   0 4936.01  208.88
  -5   0   0   81.59    5.20
  -5   0   0   79.79    9.70
  -5   0   0   75.49    5.30
   5   0   0   86.49    5.30
   5   0   0   90.39    4.90
   5   0   0   87.89    6.10
  -6   0   0  447.66   21.30
   6   0   0  482.85   23.40
  -6   0   0  448.26   22.80
  -6   0   0  470.35   21.50
  -6   0   0  425.86   23.90
   6   0   0  527.65   21.00
  -6   0   0  490.15   21.50
   6   0   0  487.75   22.80
  -6   0   0  502.35   31.80
   6   0   0  474.65   20.90
   6   0   0  506.25   21.00
   7   0   0  521.15   22.50
   7   0   0  538.45   24.50
   7   0   0  496.65   26.10
   7   0   0  484.65   27.50
   7   0   0  531.45   22.60
  -7   0   0  529.05   22.90
  -7   0   0  524.35   23.00
  -7   0   0  521.75   36.40
  -7   0   0  542.15   25.10
   7   0   0  528.25   22.60
   7   0   0  430.06   30.50
  -7   0   0  504.55   25.80
  -8   0   0   37.80    4.40
  -8   0   0   33.60    5.00
  -8   0   0   45.90   12.90
   8   0   0   28.90    3.60
   8   0   0   30.20    4.80
   8   0   0   34.20    3.00
   8   0   0   36.60    4.10
  -8   0   0   35.70    2.90
  -9   0   0   54.39    6.40
   9   0   0   49.00    6.30
  10   0   0   -0.20    0.90
  10   0   0    1.60    1.50
 -10   0   0    0.70    1.10
 -10   0   0   -1.10    0.90
  11   0   0   66.19    5.00
 -11   0   0   71.89    5.10
  11   0   0   68.99    4.00
  -2  -1   0  814.22   35.50
   2  -1   0  800.32   32.80
   2  -1   0  848.12   33.20
  -2  -1   0  834.52   31.80
  -2   1   0  720.43   35.30
   2   1   0  720.33   32.30
  -3  -1   0 2311.37   89.19
   3  -1   0 2272.17   90.69
  -3  -1   0 2254.87   94.69
  -3   1   0 2219.28   94.99
   3   1   0 2093.89   89.69
  -4  -1   0 1882.01   81.59
   4  -1   0 1811.52   75.59
   4  -1   0 1772.42   75.69
  -4  -1   0 1873.71   75.39
  -4   1   0 1891.91   74.49
   4   1   0 1894.41   74.99
   4   1   0 1812.42   73.99
  -4   1   0 1749.53   81.59
   5  -1   0 2362.56  101.79
   5  -1   0 2448.26  101.79
   5  -1   0 2475.75   99.99
  -5  -1   0 2509.65  109.59
   5   1   0 2557.54   99.69
   5   1   0 2647.04  101.09
  -5   1   0 2370.86  110.09
  -5   1   0 2504.75  100.19
  -5   1   0 2384.36  100.29
  -6  -1   0 1239.38   60.69
   6  -1   0 1270.67   49.20
  -6  -1   0 1121.69   49.90
   6  -1   0 1192.28   49.60
   6  -1   0 1151.18   51.29
  -6  -1   0 1140.39   51.49
   6  -1   0 1133.79   51.29
   6   1   0 1085.89   50.49
   6   1   0 1151.18   50.29
  -6   1   0 1162.78   49.00
   6   1   0 1241.48   48.40
  -6   1   0 1142.69   60.99
  -6   1   0 1105.39   56.19
  -6   1   0 1163.08   49.10
   7  -1   0 3881.41  157.88
   7  -1   0 3733.03  157.98
   7  -1   0 3857.91  153.08
   7  -1   0 4107.59  155.58
  -7  -1   0 3893.21  170.48
  -7  -1   0 3971.80  157.88
  -7  -1   0 3901.11  155.98
   7   1   0 4080.79  156.68
  -7   1   0 3584.54  157.38
   7   1   0 3504.85  157.78
   7   1   0 3626.74  156.98
   7   1   0 3945.41  154.08
   7   1   0 3997.10  154.18
  -7   1   0 3850.51  156.68
  -7   1   0 4013.70  155.78
  -7   1   0 3805.32  154.68
  -7   1   0 3534.95  157.98
  -7   1   0 3751.32  154.78
  -8  -1   0 2598.54  122.99
  -8  -1   0 2701.33  116.19
  -8  -1   0 2783.52  114.29
   8  -1   0 2775.42  113.79
   8  -1   0 2778.92  116.79
   8   1   0 2847.92  117.29
   8   1   0 2776.62  114.69
   8   1   0 2913.01  112.69
  -8   1   0 2798.92  113.39
   8   1   0 2929.91  112.69
  -8   1   0 2803.82  115.39
   8   1   0 2779.32  112.49
   8   1   0 2611.64  116.59
  -8   1   0 2889.51  113.09
  -8   1   0 2860.01  116.59
  -8   1   0 2684.93  114.09
   9  -1   0  911.11   41.80
   9  -1   0  870.31   39.00
  -9  -1   0  904.01   78.49
  -9  -1   0  954.80   41.70
  -9  -1   0  918.71   39.10
   9   1   0  910.31   37.80
  -9   1   0  917.31   37.60
   9   1   0  873.41   41.80
  -9   1   0  903.81   41.00
   9   1   0  895.71   40.50
  -9   1   0  876.01   41.20
   9   1   0  915.51   37.80
  10  -1   0  340.97   16.60
  10  -1   0  296.37   14.80
  10  -1   0  297.07   16.40
 -10  -1   0  314.17   16.20
  10   1   0  297.67   15.10
 -10   1   0  310.97   16.50
  10   1   0  299.07   16.50
 -10   1   0  311.47   15.30
  11  -1   0  116.69    7.20
 -11   1   0  111.99    6.40
  11   1   0  115.89    6.20
 -11   1   0  125.29    7.00
  11   1   0  120.99    7.40
   2  -2   0  577.24   25.90
  -2  -2   0  584.04   26.80
   2  -2   0  538.75   27.30
   2   2   0  563.74   23.40
   2   2   0  606.54   24.50
  -3  -2   0 2762.72  107.79
   3  -2   0 2575.84  111.89
  -3  -2   0 2630.34  106.49
  -3  -2   0 2329.97  101.49
   3  -2   0 2522.65  104.59
   3   2   0 2488.65  101.79
   3   2   0 2651.93  102.89
  -3   2   0 2445.66  102.19
  -4  -2   0 4998.60  202.78
   4  -2   0 5353.36  198.58
   4   2   0 4721.83  195.18
  -4   2   0 5036.10  195.88
  -4   2   0 4490.25  203.88
   4   2   0 4783.42  196.08
  -5  -2   0  969.10   48.90
   5  -2   0  936.71   43.30
   5   2   0  950.50   40.10
   5   2   0  969.10   40.40
  -5   2   0  966.50   40.90
  -5   2   0  993.30   40.80
   5   2   0  948.41   41.30
  -6  -2   0  556.14   32.50
   6  -2   0  579.34   28.10
  -6  -2   0  588.94   28.10
   6  -2   0  629.44   29.90
   6  -2   0  580.94   26.20
  -6  -2   0  576.64   26.50
  -6   2   0  589.84   26.60
  -6   2   0  597.04   26.50
  -6   2   0  582.04   27.70
   6   2   0  583.24   27.30
   6   2   0  592.14   27.40
   6   2   0  577.24   25.70
  -6   2   0  576.74   29.70
  -6   2   0  583.84   26.50
   6   2   0  603.54   25.80
   7  -2   0   94.49    6.60
  -7  -2   0  105.49   10.00
  -7  -2   0   96.69   15.70
  -7  -2   0   97.89    6.90
  -7  -2   0   91.49   12.80
  -7   2   0  105.39    7.20
   7   2   0   97.89    6.40
  -7   2   0  103.49    8.90
  -7   2   0   96.29    7.00
   7   2   0   97.09    8.30
  -7   2   0  106.49    9.00
   7   2   0  103.19    6.40
  -7   2   0   97.79   10.10
  -8  -2   0  166.48   10.90
   8  -2   0  148.69   10.70
  -8  -2   0  142.49   16.40
  -8  -2   0  138.39   18.10
   8  -2   0  145.79    8.60
  -8   2   0  158.78    9.30
   8   2   0  139.09   11.60
   8   2   0  152.68    8.60
   8   2   0  161.68   12.30
   8   2   0  151.88    8.60
  -8   2   0  159.68   10.60
  -8   2   0  152.78   10.80
  -8   2   0  146.19    8.90
  -8   2   0  147.69    9.30
   9  -2   0  245.98   13.80
   9  -2   0  260.37   15.30
  -9  -2   0  257.97   14.90
   9   2   0  250.27   14.20
   9   2   0  270.37   13.80
   9   2   0  276.47   12.90
  -9   2   0  272.37   14.80
  -9   2   0  258.47   14.80
  -9   2   0  273.17   12.90
   9   2   0  276.37   16.10
  -9   2   0  268.47   15.40
   9   2   0  269.97   12.80
 -10  -2   0  303.67   15.80
  10  -2   0  303.27   14.80
  10  -2   0  312.47   16.30
  10   2   0  316.87   15.40
 -10   2   0  342.97   16.80
  10   2   0  313.47   13.80
 -10   2   0  308.07   15.50
  11  -2   0  188.18    9.90
 -11  -2   0  192.38    9.60
  11   2   0  210.28    9.60
   0  -3   0    0.90    1.20
   0  -3   0    0.80    1.00
   0   3   0    4.80    1.40
  -1  -3   0 1322.77   56.79
  -1  -3   0 1283.57   53.19
  -1  -3   0 1351.86   56.49
   1  -3   0 1369.16   55.69
   1  -3   0 1311.47   54.49
   1  -3   0 1358.06   56.69
  -1  -3   0 1391.96   53.59
   1   3   0 1299.97   53.69
  -1   3   0 1152.58   54.79
   1   3   0 1298.57   54.49
   2  -3   0  511.55   24.00
  -2  -3   0  489.55   24.40
   2  -3   0  480.05   23.60
  -2  -3   0  505.05   22.60
   2   3   0  493.55   20.00
  -2   3   0  460.85   20.50
  -2   3   0  416.26   22.20
   2   3   0  477.65   21.20
   2   3   0  438.76   19.40
  -3  -3   0  897.11   39.80
  -3  -3   0  862.51   40.60
   3  -3   0  871.71   39.20
   3   3   0  789.72   34.80
  -3   3   0  832.52   35.30
   3   3   0  851.61   36.30
   4  -3   0 1338.17   69.69
  -4  -3   0 1481.45   66.69
  -4  -3   0 1527.45   66.69
   4  -3   0 1489.15   64.39
  -4   3   0 1442.26   60.59
   4   3   0 1521.05   59.89
   4   3   0 1493.25   61.19
  -4   3   0 1482.25   60.29
   4   3   0 1416.56   59.89
   5  -3   0 1201.68   52.89
  -5  -3   0 1287.77   59.39
   5  -3   0 1290.57   55.99
   5  -3   0 1163.28   54.29
   5   3   0 1224.38   54.79
  -5   3   0 1199.98   52.79
  -5   3   0 1200.38   53.09
   5   3   0 1314.07   52.69
  -5   3   0 1222.18   51.99
  -5   3   0 1143.29   55.39
  -5   3   0 1290.87   51.79
  -6  -3   0  829.02   44.10
   6  -3   0  817.92   36.20
  -6  -3   0  838.72   43.60
   6  -3   0  789.72   36.10
   6  -3   0  779.22   39.10
  -6  -3   0  735.03   35.70
  -6   3   0  778.52   34.70
   6   3   0  768.02   33.90
  -6   3   0  767.22   34.80
  -6   3   0  763.92   39.20
   6   3   0  795.22   35.60
  -6   3   0  803.62   35.00
  -6   3   0  761.92   35.90
   6   3   0  763.72   33.80
   6   3   0  798.02   35.70
   6   3   0  839.22   34.50
  -7  -3   0 3924.41  178.78
   7  -3   0 4281.67  170.18
   7  -3   0 3964.10  169.08
  -7  -3   0 3807.12  197.58
  -7  -3   0 4447.46  170.28
  -7   3   0 4272.87  168.58
   7   3   0 4343.17  170.58
  -7   3   0 4016.20  168.28
   7   3   0 4243.98  167.58
  -7   3   0 4182.88  169.98
   7   3   0 4198.38  169.58
   7   3   0 4200.38  168.08
  -7   3   0 4238.18  168.98
   7   3   0 4145.08  167.58
   8  -3   0 2460.15   93.79
  -8  -3   0 2266.87   93.09
  -8  -3   0 2107.19  103.09
   8  -3   0 2156.58   92.19
  -8   3   0 2152.98   91.29
   8   3   0 2315.67   90.89
   8   3   0 2286.97   90.79
  -8   3   0 2132.79   91.49
   8   3   0 2263.67   90.79
  -8   3   0 2135.49   91.39
  -8   3   0 2155.58   92.89
   9  -3   0   90.69    6.60
  -9  -3   0   92.89    6.90
   9  -3   0   94.29    7.20
   9   3   0   95.79    5.90
  -9   3   0   92.89    6.20
   9   3   0   92.59    8.00
  -9   3   0   91.39    6.80
   9   3   0   96.79    5.80
  -9   3   0   98.99    7.20
  -9   3   0   95.39    6.00
   9   3   0  105.49    7.20
  10  -3   0   48.20    4.10
 -10  -3   0   42.00   10.50
 -10  -3   0   50.59    3.90
  10  -3   0   54.49    3.90
  10   3   0   51.09    4.00
  10   3   0   49.40    3.10
 -10   3   0   51.99    4.00
  10   3   0   38.50    3.30
   0  -4   0 7808.92  306.37
   0  -4   0 7534.05  305.37
   0   4   0 7398.96  302.77
  -1  -4   0 9447.55  390.56
   1  -4   0 9999.00  389.16
  -1  -4   0 9638.74  390.26
   1  -4   0 9648.43  390.66
   1   4   0 9780.52  386.36
   1   4   0 9733.63  387.56
  -1   4   0 9753.82  388.26
   2  -4   0  572.84   29.00
  -2  -4   0  550.94   29.50
   2  -4   0  630.84   25.80
  -2   4   0  590.84   27.70
  -2   4   0  543.85   23.80
   2   4   0  523.65   23.30
   2   4   0  553.74   25.80
   2   4   0  570.34   24.40
  -3  -4   0 3651.93  149.19
   3  -4   0 3456.45  146.49
  -3  -4   0 3680.03  143.39
   3  -4   0 3560.54  143.19
   3  -4   0 3626.34  144.49
   3   4   0 3425.16  142.89
  -3   4   0 3239.88  142.39
   3   4   0 3393.16  141.09
   3   4   0 3588.74  140.89
  -3   4   0 3593.84  141.39
  -3   4   0 3571.54  145.99
  -4  -4   0 1771.02   74.39
   4  -4   0 1634.44   71.69
   4  -4   0 1686.93   71.69
   4  -4   0 1781.12   76.39
   4  -4   0 1815.12   73.09
  -4  -4   0 1698.93   78.49
   4   4   0 1686.13   69.89
   4   4   0 1774.02   69.79
  -4   4   0 1636.04   70.59
   4   4   0 1710.13   71.59
  -4   4   0 1643.04   74.99
  -4   4   0 1681.93   70.19
  -5  -4   0  726.03   40.60
  -5  -4   0  789.02   38.10
   5  -4   0  769.92   33.90
   5  -4   0  736.03   34.60
   5  -4   0  793.52   33.50
   5  -4   0  720.53   33.30
   5  -4   0  703.73   37.50
  -5  -4   0  773.72   33.30
  -5   4   0  785.12   32.80
   5   4   0  716.83   32.00
  -5   4   0  765.72   38.00
  -5   4   0  717.93   33.80
   5   4   0  658.83   31.80
   5   4   0  727.83   33.60
  -5   4   0  716.93   32.90
  -5   4   0  793.02   33.10
   5   4   0  718.53   33.40
   6  -4   0 1574.74   67.19
  -6  -4   0 1620.24   66.69
   6  -4   0 1626.34   68.09
   6  -4   0 1568.44   73.59
   6  -4   0 1573.34   66.89
  -6  -4   0 1630.14   76.99
  -6  -4   0 1593.04   73.29
  -6   4   0 1480.05   67.09
   6   4   0 1549.14   66.99
  -6   4   0 1693.23   68.49
   6   4   0 1434.96   67.09
   6   4   0 1746.43   65.69
  -6   4   0 1609.24   66.29
  -6   4   0 1583.24   66.29
   6   4   0 1544.15   65.69
   6   4   0 1423.86   64.99
   7  -4   0  232.58   13.40
  -7  -4   0  207.28   20.10
  -7  -4   0  240.28   18.50
  -7  -4   0  250.27   13.30
   7  -4   0  249.18   13.60
  -7   4   0  230.88   13.70
   7   4   0  254.67   12.50
  -7   4   0  223.28   12.70
  -7   4   0  233.98   13.10
   7   4   0  240.98   13.70
  -7   4   0  289.27   16.20
   7   4   0  226.98   13.50
   7   4   0  221.28   12.10
  -8  -4   0   16.60    2.50
  -8  -4   0   11.00    7.60
   8  -4   0    9.80    2.00
   8  -4   0   12.80    2.50
   8   4   0   11.00    2.20
  -8   4   0   12.50    2.30
  -8   4   0   13.50    2.90
   8   4   0   12.60    2.00
  -8   4   0   16.40    2.80
   8   4   0   13.50    2.60
  -9  -4   0   27.30    9.20
   9  -4   0   31.50    3.60
  -9  -4   0   27.50    3.00
   9  -4   0   28.70    3.20
  -9   4   0   30.50    3.50
   9   4   0   24.80    3.00
  -9   4   0   29.50    3.80
   9   4   0   28.60    2.60
  -9   4   0   25.40    3.90
   9   4   0   31.30    3.20
   9   4   0   20.60    4.50
  -9   4   0   27.50    2.70
  10  -4   0   50.79    3.40
  10  -4   0   54.89    3.70
 -10   4   0   59.39    3.90
 -10   4   0   54.59    2.90
  10   4   0   55.59    4.00
  10   4   0   56.09    3.20
   0  -5   0    0.40    1.80
   0  -5   0   -1.60    2.10
   0  -5   0   -1.40    1.00
   0   5   0    2.30    2.20
   1  -5   0  146.99   10.00
   1  -5   0  166.08   11.50
   1  -5   0  154.38    9.80
  -1  -5   0  153.38    8.90
  -1  -5   0  154.98   12.50
   1  -5   0  137.99   12.40
   1  -5   0  152.88    9.10
  -1  -5   0  147.49    9.50
   1   5   0  140.39    6.90
   1   5   0  160.18    9.40
  -1   5   0  142.19   10.30
   1   5   0  157.68   10.30
  -1   5   0  143.39    7.30
   2  -5   0 1225.68   52.59
  -2  -5   0 1179.98   50.29
   2  -5   0 1151.58   51.79
  -2  -5   0 1247.68   51.49
  -2  -5   0 1201.58   56.99
   2  -5   0 1201.58   51.29
   2  -5   0 1158.98   56.39
  -2  -5   0 1296.77   73.39
   2   5   0 1159.58   48.60
  -2   5   0 1191.48   49.10
   2   5   0 1149.69   51.79
  -2   5   0 1168.48   53.79
  -3  -5   0  107.59   11.30
   3  -5   0  104.79    7.60
   3  -5   0  116.09   14.20
   3  -5   0  112.29    8.30
   3  -5   0  101.39    7.80
  -3  -5   0  113.29   18.30
  -3  -5   0  104.29    6.80
  -3   5   0   96.19    7.00
   3   5   0   96.59    6.50
   3   5   0  103.89    6.20
  -3   5   0  112.99   10.30
  -4  -5   0 2915.91  116.89
   4  -5   0 3081.49  119.99
   4  -5   0 2790.92  123.89
   4  -5   0 2950.40  118.39
   4  -5   0 2976.20  116.09
  -4  -5   0 2881.91  146.19
   4  -5   0 2893.21  118.29
  -4  -5   0 2650.33  126.19
  -4   5   0 2853.01  122.99
   4   5   0 2752.52  118.39
  -4   5   0 2744.63  116.39
  -4   5   0 2792.62  116.79
   4   5   0 3045.70  116.09
   4   5   0 2873.41  116.19
   5  -5   0   34.30    4.20
  -5  -5   0   29.20    7.60
  -5  -5   0   38.50    3.30
  -5  -5   0   46.30   12.80
   5  -5   0   45.00    4.70
   5  -5   0   51.29    4.10
   5  -5   0   35.90    4.60
   5  -5   0   42.80   10.40
   5   5   0   41.80    4.00
   5   5   0   36.10    6.90
  -5   5   0   42.20    4.90
  -5   5   0   44.60    4.50
   5   5   0   40.80    4.10
  -5   5   0   38.40    4.00
  -5   5   0   36.80    4.30
   6  -5   0  482.35   22.70
   6  -5   0  462.15   21.10
  -6  -5   0  367.86   29.50
   6  -5   0  479.95   23.30
  -6  -5   0  442.66   42.30
  -6  -5   0  458.85   20.00
   6   5   0  472.45   21.00
  -6   5   0  441.06   22.10
   6   5   0  417.96   21.90
  -6   5   0  447.36   21.50
  -6   5   0  458.55   21.60
   6   5   0  494.95   21.50
  -6   5   0  460.25   21.80
   6   5   0  454.05   20.80
   7  -5   0 1102.39   50.19
   7  -5   0 1119.39   49.00
  -7  -5   0 1173.58   47.60
  -7   5   0 1208.28   49.80
  -7   5   0 1125.09   50.09
   7   5   0 1190.68   49.30
  -7   5   0 1200.08   49.99
   7   5   0 1146.29   49.10
  -7   5   0 1186.28   49.90
   7   5   0 1239.88   49.20
   8  -5   0 1177.78   48.40
  -8  -5   0 1147.99   70.79
   8  -5   0 1147.49   49.70
   8   5   0 1118.39   49.40
   8   5   0 1199.18   48.90
  -8   5   0 1165.28   49.10
   8   5   0 1139.69   48.70
  -8   5   0 1229.68   49.50
  -8   5   0 1234.18   49.60
   8   5   0 1185.78   48.90
  -9  -5   0  258.47   23.30
   9  -5   0  256.27   12.80
   9   5   0  290.97   14.60
   9   5   0  284.97   12.80
  -9   5   0  283.57   12.90
   9   5   0  290.87   12.70
  -9   5   0  280.27   13.20
  -9   5   0  307.77   12.80
   0  -6   0 4739.93  172.88
   0  -6   0 4081.89  172.78
   0  -6   0 3642.74  182.48
   0  -6   0 4647.44  173.78
   0   6   0 4127.59  181.88
   0   6   0 4316.57  169.68
   1  -6   0 1702.73   70.79
  -1  -6   0 1629.64   70.09
   1  -6   0 1770.62   81.09
   1  -6   0 1757.52   71.79
  -1  -6   0 1758.32   71.49
  -1  -6   0 1636.64   76.49
   1  -6   0 1626.54   77.39
  -1   6   0 1735.83   73.99
   1   6   0 1594.64   67.89
  -1   6   0 1666.93   73.99
  -1   6   0 1621.64   68.09
   2  -6   0 1178.08   50.49
  -2  -6   0 1182.08   49.40
  -2  -6   0 1192.08   57.59
   2  -6   0 1179.18   51.29
   2  -6   0 1068.29   56.29
   2  -6   0 1240.08   51.29
  -2   6   0 1285.47   51.99
   2   6   0 1119.59   51.69
  -2   6   0 1097.39   48.00
   2   6   0 1074.29   47.70
  -3  -6   0  983.30   53.39
   3  -6   0 1066.39   46.30
  -3  -6   0 1097.29   44.70
   3  -6   0 1048.60   52.59
   3  -6   0 1018.90   46.80
   3  -6   0 1107.79   46.30
  -3   6   0 1082.49   44.10
  -3   6   0  996.00   44.70
   3   6   0 1126.29   43.80
   3   6   0 1021.60   47.20
   3   6   0  956.70   46.80
  -4  -6   0  399.76   17.10
   4  -6   0  370.36   19.20
   4  -6   0  311.87   23.80
   4  -6   0  397.16   18.90
   4  -6   0  344.97   18.00
  -4  -6   0  337.27   33.70
  -4  -6   0  326.87   25.40
  -4   6   0  335.27   17.40
  -4   6   0  367.16   17.40
  -4   6   0  328.77   19.50
   4   6   0  366.16   16.80
   5  -6   0   85.59    6.40
   5  -6   0   73.29    6.50
   5  -6   0   66.49    5.50
  -5  -6   0   70.89   14.30
  -5   6   0   79.79    5.70
   5   6   0   66.69    5.10
  -5   6   0   80.79    5.80
   5   6   0   69.09    5.20
  -5   6   0   82.39    5.70
   5   6   0   78.99    5.50
  -6  -6   0   86.59   15.10
   6  -6   0   88.69    6.60
  -6   6   0   97.79    7.80
   6   6   0   87.69    5.70
  -6   6   0   85.69    6.10
   6   6   0   92.49    6.00
  -6   6   0   84.89    6.00
   6   6   0   92.79    5.90
  -6   6   0   84.49    6.20
   7  -6   0  323.27   16.50
   7   6   0  337.97   15.60
  -7   6   0  359.26   18.80
  -7   6   0  323.37   16.00
   7   6   0  346.27   15.80
  -7   6   0  308.77   17.70
   7   6   0  390.16   18.50
  -7   6   0  357.26   16.30
   8  -6   0   76.59    4.80
  -8   6   0   70.39    5.80
   8   6   0   82.69    4.50
  -8   6   0   84.49    4.90
  -8   6   0   76.39    4.80
   8   6   0   81.69    4.70
   0  -7   0    3.00    1.50
   0  -7   0    1.10    1.10
   0   7   0    1.00    1.50
   1  -7   0  180.28   12.40
   1  -7   0  194.78   11.10
   1  -7   0  179.18   13.40
  -1   7   0  183.48    9.20
   1   7   0  184.18    9.30
   2  -7   0  327.27   17.30
   2  -7   0  347.77   17.20
  -2  -7   0  340.87   16.20
   2  -7   0  320.07   17.10
   2   7   0  321.37   15.20
  -2   7   0  330.17   15.20
   3  -7   0  642.54   29.80
   3  -7   0  697.93   30.40
  -3  -7   0  642.14   28.30
   3  -7   0  623.14   29.60
   3   7   0  643.64   27.90
   3   7   0  667.03   28.20
  -3   7   0  650.13   28.30
  -3   7   0  618.44   28.50
   4  -7   0  118.39    7.90
   4  -7   0  112.69    7.40
   4   7   0  102.79    7.80
  -4   7   0   96.79    6.50
  -4   7   0  105.79    7.70
   4   7   0  105.49    6.60
  -4   7   0  111.39    6.70
  -5   7   0   18.10    2.40
  -5   7   0   15.60    2.60
   5   7   0   10.20    2.00
   5   7   0   11.00    2.00
  -5   7   0   13.70    2.40
   6  -7   0  729.33   31.50
  -6   7   0  722.53   30.60
  -6   7   0  749.33   31.00
  -6   7   0  713.23   30.90
   6   7   0  737.63   30.70
   6   7   0  724.23   30.70
   7  -7   0  154.48    9.10
  -7   7   0  196.28    8.40
   7   7   0  173.28    8.10
   7   7   0  174.18    8.50
  -7   7   0  187.88    9.10
   1  -8   0 1064.29   44.80
  -1  -8   0 1049.59   44.30
   2  -8   0   74.49    5.30
  -2  -8   0   70.89    4.60
   3  -8   0  113.19    6.70
  -3   8   0  108.29    6.80
   4  -8   0  209.48   10.50
   5  -8   0  246.88   11.70
   0  -9   0   -1.10    0.50
  11   0  -1   38.30    4.20
 -11   0   1   32.90    3.00
 -11   0   1   35.70    3.60
  11   0  -1   40.10    3.10
  10   0  -1  208.88   12.90
 -10   0   1  214.88   12.60
 -10   0   1  203.68   11.10
  10   0  -1  210.68   11.40
   9   0  -1   24.10    4.20
  -9   0   1   24.10    3.90
  -9   0   1   21.20   13.60
  -9   0   1   32.40   11.90
   9   0  -1   26.10    2.70
   9   0  -1   33.40    3.80
  -9   0   1   29.60    3.90
   8   0  -1 1728.03   70.19
   8   0  -1 1665.33   69.99
  -8   0   1 1835.42   70.29
  -8   0   1 1728.23   72.59
   8   0  -1 1701.23   74.49
  -8   0   1 1684.53   73.79
   8   0  -1 1669.73   71.99
   8   0  -1 1701.23   70.19
  -8   0   1 1736.23   88.59
   7   0  -1  985.50   46.40
  -7   0   1  995.10   44.90
  -7   0   1  990.80   46.00
   7   0  -1 1046.60   42.90
  -7   0   1 1017.60   42.90
  -7   0   1 1021.70   42.90
   7   0  -1 1096.49   42.90
   7   0  -1 1055.19   42.90
  -7   0   1 1001.20   56.09
   7   0  -1 1051.69   44.70
   6   0  -1  424.46   18.60
  -6   0   1  424.06   20.00
  -6   0   1  412.16   27.60
   6   0  -1  399.56   20.40
   6   0  -1  449.06   18.60
  -6   0   1  421.06   18.90
  -6   0   1  413.06   18.90
  -5   0   1  149.88    8.50
   5   0  -1  156.28    8.80
   5   0  -1  158.08    7.70
   5   0  -1  163.68    7.60
  -5   0   1  140.29    7.80
  -5   0   1  153.98   13.10
   4   0  -1  827.42   35.20
  -4   0   1  806.32   34.50
  -4   0   1  861.51   40.70
   4   0  -1  850.51   34.30
  -3   0   1  212.78   13.50
   3   0  -1  244.08   10.60
  -1   0   1 1978.90   77.49
  -1   0   1 1938.11   77.89
   0   0   1  768.82   30.70
   0   0  -1  802.82   30.80
   0   0   1  740.83   30.80
   0   0  -1  745.03   30.70
  -2   0  -1 1066.09   48.20
  -2   0  -1 1011.40   44.20
   2   0   1 1157.08   44.20
  -3   0  -1 3760.02  156.58
   3   0   1 3687.83  150.38
  -3   0  -1 3850.41  149.88
   3   0   1 3721.53  149.49
  -4   0  -1  705.13   29.80
  -4   0  -1  684.43   37.30
   4   0   1  708.53   29.30
   4   0   1  712.23   30.70
   5   0   1   56.39    4.00
  -5   0  -1   63.09    4.70
   5   0   1   55.09    4.90
  -5   0  -1   60.19    8.90
  -5   0  -1   52.59    6.20
   6   0   1 1710.93   72.59
  -6   0  -1 1725.73   71.29
  -6   0  -1 1714.73   71.39
   6   0   1 1708.63   70.49
   6   0   1 1714.43   73.79
  -6   0  -1 1814.82   86.89
  -6   0  -1 1670.93   72.99
  -6   0  -1 1705.63   71.29
   6   0   1 1836.12   70.59
   7   0   1   95.79    5.50
  -7   0  -1   99.89    6.10
  -7   0  -1   96.49    8.10
  -7   0  -1   88.09    6.20
  -7   0  -1   67.69   14.10
   7   0   1   80.69    8.30
   7   0   1   86.79    5.60
   7   0   1   86.19    7.90
   8   0   1   48.80    6.10
   8   0   1   59.39    5.30
  -8   0  -1   61.89    5.80
  -8   0  -1   52.19    6.10
  -8   0  -1   60.99    4.00
   8   0   1   56.69    3.70
  -9   0  -1 1444.16   60.39
   9   0   1 1342.07   59.49
   9   0   1 1434.16   62.39
  -9   0  -1 1465.75   62.09
  10   0   1  223.28   12.60
 -10   0  -1  232.48   11.10
 -10   0  -1  225.68   12.40
  10   0   1  210.58   10.80
 -11   0  -1   19.60    2.20
  11   0   1   16.00    2.00
 -11  -1   1  254.87   12.30
  11  -1  -1  243.68   12.60
  11  -1  -1  204.78   10.70
  11   1  -1  246.78   12.60
  11   1  -1  245.58   11.50
 -11   1   1  191.68   12.80
 -11   1   1  250.97   11.60
  10  -1  -1  327.47   15.50
  10  -1  -1  325.77   17.50
 -10  -1   1  324.07   17.00
  10   1  -1  323.97   16.20
  10   1  -1  317.67   17.60
 -10   1   1  320.97   17.20
  10   1  -1  323.27   14.30
 -10   1   1  321.27   16.10
  -9  -1   1  386.96   20.80
  -9  -1   1  388.36   32.50
  -9  -1   1  387.86   18.80
   9  -1  -1  406.56   21.40
   9  -1  -1  408.86   19.20
   9   1  -1  396.36   21.60
  -9   1   1  382.26   20.70
   9   1  -1  396.06   18.00
   9   1  -1  390.26   18.00
   9   1  -1  400.46   18.20
  -9   1   1  403.66   17.50
  -9   1   1  397.36   20.10
   9   1  -1  381.56   19.60
  -8  -1   1   10.60    5.80
   8  -1  -1   17.50    2.80
  -8  -1   1   17.40    3.80
  -8  -1   1   10.30    2.40
   8  -1  -1   26.70    4.30
   8  -1  -1   18.10    2.90
  -8  -1   1   20.30    8.00
   8   1  -1   17.90    2.70
   8   1  -1   20.40    4.70
   8   1  -1   13.90    2.10
  -8   1   1    8.80    3.00
  -8   1   1   17.20    2.50
   8   1  -1   15.60    2.50
  -8   1   1   18.00    3.10
  -8   1   1   22.10    3.20
   8   1  -1   16.60    2.90
   7  -1  -1   27.40    2.70
   7  -1  -1   28.40    3.50
  -7  -1   1   36.00    6.70
   7  -1  -1   27.20    4.60
  -7  -1   1   34.10    8.70
  -7  -1   1   25.40    4.10
   7  -1  -1   20.20    3.60
  -7  -1   1   31.70    3.80
   7   1  -1   30.70    3.00
  -7   1   1   24.40    3.50
   7   1  -1   24.60    4.00
  -7   1   1   23.10    4.80
  -7   1   1   20.00    2.90
  -7   1   1   25.20    3.90
  -7   1   1   25.10    9.10
  -7   1   1   28.30    3.30
  -7   1   1   28.90    4.50
  -6  -1   1   35.10    4.50
   6  -1  -1   29.40    4.30
  -6  -1   1   38.80    7.10
   6  -1  -1   35.70    4.30
   6  -1  -1   36.70    3.20
   6  -1  -1   37.60    3.30
  -6   1   1   34.30    3.40
  -6   1   1   30.80    3.30
  -6   1   1   35.80    7.60
   6   1  -1   33.40    3.10
   6   1  -1   28.40    4.70
  -6   1   1   35.90    4.40
   6   1  -1   31.00    3.00
  -6   1   1   34.20    3.60
   6   1  -1   33.20    2.90
  -6   1   1   27.30    4.10
   6   1  -1   35.90    3.90
   5  -1  -1  980.60   39.20
  -5  -1   1 1043.50   48.20
  -5  -1   1  963.90   39.00
  -5  -1   1  989.60   38.90
   5  -1  -1  921.11   40.70
  -5   1   1  920.31   44.90
  -5   1   1  938.81   48.20
   5   1  -1  920.71   39.60
  -5   1   1  943.31   40.20
   5   1  -1  952.20   39.50
  -5   1   1  891.31   40.60
   5   1  -1 1011.70   40.60
   4  -1  -1 2684.53  111.89
  -4  -1   1 2701.93  110.19
  -4  -1   1 2874.91  117.49
  -4  -1   1 2738.03  110.29
  -4   1   1 2745.43  120.59
  -4   1   1 2847.92  111.39
   4   1  -1 2790.72  111.49
   4   1  -1 2810.92  110.89
   3  -1  -1   77.59    4.40
  -3  -1   1   80.19    6.60
   3   1  -1   73.09    3.90
  -3   1   1   62.79    3.90
   3   1  -1   64.59    3.70
  -2  -1   1 2786.72  102.69
  -2  -1   1 2595.64  103.59
   2  -1  -1 2570.74  102.29
  -2   1   1 2446.56  104.79
  -2   1   1 2312.27  102.49
   2   1  -1 2618.74  101.69
  -2  -1  -1 1494.65   57.69
  -2  -1  -1 1400.66   61.89
   2  -1   1 1503.35   58.19
   2   1   1 1338.37   57.89
  -2   1  -1 1366.76   61.89
   2   1   1 1399.76   57.49
   2   1   1 1461.65   57.99
  -3  -1  -1  171.08   13.10
   3  -1   1  192.38    9.70
  -3  -1  -1  201.58    9.30
  -3   1  -1  165.88    8.70
   3   1   1  182.98    8.60
  -3   1  -1  195.98   13.90
   3   1   1  182.78    9.30
   4  -1   1  803.12   34.10
  -4  -1  -1  713.93   39.70
  -4   1  -1  704.53   40.10
  -4   1  -1  763.72   32.90
   4   1   1  825.32   32.60
  -4   1  -1  799.02   32.80
   4   1   1  796.82   33.50
   4   1   1  762.32   32.20
  -5  -1  -1   15.30    5.10
   5  -1   1   10.20    2.60
  -5   1  -1   13.70    2.20
  -5   1  -1   15.70    2.50
   5   1   1   13.30    2.00
   5   1   1   12.90    1.90
   5   1   1   11.60    2.30
  -5   1  -1    7.70    4.30
   6  -1   1   89.39    6.10
   6  -1   1   90.39    7.60
  -6  -1  -1   78.09   11.90
   6  -1   1   68.09    6.60
  -6  -1  -1   58.99    6.90
   6  -1   1   75.59    7.50
  -6  -1  -1   72.79    6.30
  -6   1  -1   80.29   12.70
   6   1   1   81.09    6.70
   6   1   1   81.49    5.10
  -6   1  -1   73.59    5.70
  -6   1  -1   73.09    5.70
  -6   1  -1   58.79    6.90
  -6   1  -1   73.09    5.70
   6   1   1   90.39    5.40
   6   1   1   78.59    5.20
   6   1   1   80.29    6.30
   6   1   1   63.39    7.60
  -6   1  -1   78.79    6.80
   7  -1   1  211.98   15.30
  -7  -1  -1  215.48   21.30
  -7  -1  -1  211.78   14.20
   7  -1   1  220.98   16.70
  -7   1  -1  219.78   11.90
   7   1   1  211.28   12.80
  -7   1  -1  226.18   12.00
   7   1   1  215.98   14.40
  -7   1  -1  214.88   12.00
   7   1   1  230.88   11.20
  -7   1  -1  214.28   13.10
   7   1   1  221.38   11.10
  -7   1  -1  218.18   14.10
  -8  -1  -1   49.70   13.70
  -8  -1  -1   65.89    6.50
   8  -1   1   71.39    5.50
   8  -1   1   72.19    6.80
  -8  -1  -1   65.39    5.80
   8   1   1   68.79    4.60
  -8   1  -1   69.79    5.50
  -8   1  -1   62.49    6.70
   8   1   1   59.09    6.80
  -8   1  -1   64.79    6.10
   8   1   1   57.89    5.30
   8   1   1   62.59   10.20
   8   1   1   73.49    4.90
  -8   1  -1   62.09    4.80
   9  -1   1   35.80    3.40
   9  -1   1   43.30    5.00
  -9  -1  -1   34.70    3.70
  -9  -1  -1   29.80    4.10
   9   1   1   26.60    4.40
  -9   1  -1   31.80    4.00
  -9   1  -1   30.70    4.40
  -9   1  -1   31.50    2.60
   9   1   1   34.70    2.60
   9   1   1   31.40    3.60
  10  -1   1  376.56   18.20
  10  -1   1  323.17   16.00
 -10  -1  -1  405.96   19.10
  10   1   1  365.46   17.10
 -10   1  -1  320.97   16.60
 -10   1  -1  329.37   17.10
  10   1   1  309.27   17.20
  11  -1   1  189.88    9.50
 -11  -1  -1  198.78    9.40
 -11  -1  -1  156.78   16.00
 -11   1  -1  214.28   10.90
  11  -2  -1   22.80    2.70
 -11  -2   1   23.00    2.50
 -11   2   1   23.10    3.00
  11   2  -1   23.50    2.50
 -11   2   1   21.40    2.80
 -10  -2   1  262.47   13.70
  10  -2  -1  259.47   14.20
  10  -2  -1  249.78   12.40
  10   2  -1  255.07   11.80
  10   2  -1  257.27   15.50
  10   2  -1  212.28   12.60
  10   2  -1  256.27   13.20
 -10   2   1  254.97   11.40
 -10   2   1  252.07   13.80
 -10   2   1  256.67   13.30
   9  -2  -1  838.12   39.10
  -9  -2   1  751.52   61.59
   9  -2  -1  781.12   36.50
  -9  -2   1  866.71   40.90
   9  -2  -1  856.51   36.00
  -9   2   1  926.11   40.70
   9   2  -1  811.72   35.70
   9   2  -1  809.92   37.80
  -9   2   1  820.22   36.50
   9   2  -1  873.91   39.40
  -9   2   1  856.71   35.90
   9   2  -1  824.82   35.70
  -9   2   1  824.22   38.30
  -9   2   1  858.91   36.00
   8  -2  -1  602.94   29.80
   8  -2  -1  617.74   27.50
  -8  -2   1  593.04   29.40
  -8  -2   1  561.04   35.70
  -8   2   1  635.64   27.60
  -8   2   1  606.94   29.10
  -8   2   1  621.34   27.70
   8   2  -1  622.74   28.80
   8   2  -1  674.13   27.40
   8   2  -1  634.54   27.10
  -8   2   1  631.84   27.80
   8   2  -1  567.54   30.00
  -8   2   1  585.14   29.60
  -7  -2   1 1645.44   69.19
   7  -2  -1 1672.83   69.59
   7  -2  -1 1730.63   72.19
  -7  -2   1 1713.63   78.59
  -7  -2   1 1662.13   71.59
  -7  -2   1 1767.32   82.09
   7   2  -1 1758.72   69.19
   7   2  -1 1563.84   70.79
   7   2  -1 1692.83   69.19
  -7   2   1 1540.95   71.49
  -7   2   1 1792.82   69.99
  -7   2   1 1726.33   69.99
  -7   2   1 1707.13   71.49
   7   2  -1 1645.44   69.09
   7   2  -1 1599.14   71.19
  -7   2   1 1687.13   69.79
  -7   2   1 1640.54   73.59
  -6  -2   1  176.68   14.30
   6  -2  -1  161.48   10.70
   6  -2  -1  173.08   10.90
   6  -2  -1  169.08    9.30
  -6  -2   1  181.48   15.50
  -6  -2   1  170.28   10.60
  -6   2   1  178.58   11.90
   6   2  -1  157.78    9.60
   6   2  -1  159.28    8.70
  -6   2   1  159.28   10.90
  -6   2   1  167.48    9.30
   6   2  -1  168.38   10.10
   6   2  -1  155.68    8.80
  -6   2   1  168.78    9.50
  -5  -2   1  149.79   12.60
   5  -2  -1  142.39    9.20
  -5  -2   1  154.68   11.80
  -5   2   1  142.09    8.10
  -5   2   1  141.49    7.90
   5   2  -1  146.29    8.10
   5   2  -1  137.49    7.30
   5   2  -1  130.99    7.50
  -5   2   1  146.79    9.90
  -5   2   1  138.09   13.90
   4  -2  -1  940.21   40.40
  -4  -2   1 1038.70   44.40
  -4  -2   1  879.21   42.50
  -4   2   1  899.11   45.70
  -4   2   1  923.31   38.90
  -4   2   1  962.80   38.70
  -4   2   1  850.31   40.50
   4   2  -1  925.21   38.70
  -3  -2   1 4806.42  191.08
   3  -2  -1 5066.99  189.38
  -3   2   1 4261.67  189.18
   3   2  -1 4413.36  186.98
   3   2  -1 4931.21  187.48
  -3   2   1 4720.83  193.08
  -3   2   1 4740.73  187.28
   2  -2  -1 4239.18  184.18
   2  -2  -1 4626.44  182.38
  -2  -2   1 4585.44  183.48
  -2  -2   1 4834.52  182.68
   2   2  -1 4474.55  180.58
  -2   2   1 4490.85  182.08
  -1  -2   1   67.79    5.20
   1  -2  -1   73.59    5.40
   1  -2  -1   73.09    5.10
  -1  -2   1   74.49    5.20
   1  -2  -1   76.69    4.60
  -1   2   1   72.59    4.60
   0  -2  -1 2548.34  102.59
   0  -2  -1 2594.54  102.39
   0  -2  -1 2789.32  102.59
   0  -2  -1 2407.76  101.89
   0  -2  -1 2138.79  101.29
   0  -2   1 2657.83  102.49
   0  -2   1 2562.34  102.49
   0   2   1 2430.46  100.89
  -1  -2  -1   49.30    4.40
  -1  -2  -1   48.40    3.60
  -1  -2  -1   58.29    5.10
   1  -2   1   51.79    4.50
   1  -2   1   56.79    4.30
   1   2   1   60.19    3.80
   2  -2   1  786.32   34.40
  -2  -2  -1  825.82   36.70
   2  -2   1  770.72   36.10
  -2  -2  -1  732.63   32.30
   2   2   1  735.83   32.60
   2   2   1  713.43   31.70
   2   2   1  783.62   31.90
  -2   2  -1  827.62   31.70
  -3  -2  -1 2539.95  104.49
   3  -2   1 2494.35  111.79
   3  -2   1 2676.83  107.39
  -3  -2  -1 2636.84  110.99
   3   2   1 2581.64  103.89
   3   2   1 2652.33  105.19
  -3   2  -1 2576.24  104.19
  -4  -2  -1 1389.76   64.59
   4  -2   1 1357.16   59.39
   4   2   1 1346.27   55.89
   4   2   1 1387.46   57.19
  -4   2  -1 1306.17   56.09
  -4   2  -1 1364.36   56.49
   4   2   1 1388.86   55.89
   5  -2   1  291.57   15.50
  -5  -2  -1  305.27   21.80
   5  -2   1  282.87   16.80
   5   2   1  274.27   13.30
   5   2   1  265.87   13.30
  -5   2  -1  242.98   15.50
   5   2   1  272.67   14.90
   5   2   1  274.67   13.40
  -5   2  -1  294.57   14.20
  -5   2  -1  275.97   14.30
  -5   2  -1  287.87   13.90
   5   2   1  283.37   14.70
  -6  -2  -1  443.76   30.30
   6  -2   1  421.86   19.70
   6  -2   1  432.06   21.20
  -6  -2  -1  439.46   20.60
   6  -2   1  392.16   23.50
   6  -2   1  422.46   21.90
   6   2   1  429.86   19.50
   6   2   1  435.56   21.10
   6   2   1  379.96   19.20
  -6   2  -1  418.86   21.50
   6   2   1  455.95   21.70
  -6   2  -1  444.66   20.50
  -6   2  -1  429.16   20.30
  -6   2  -1  410.46   20.10
  -7  -2  -1   98.09   12.70
   7  -2   1   84.09   14.70
  -7  -2  -1  108.99    7.20
  -7  -2  -1   98.69    8.30
   7  -2   1   96.19    6.70
  -7  -2  -1  112.79   14.70
   7  -2   1  100.89    8.40
  -7   2  -1  102.99    7.00
  -7   2  -1  102.39    8.10
   7   2   1   99.69    6.50
   7   2   1  103.79    7.80
   7   2   1  104.69    6.60
   7   2   1  103.99    6.40
   7   2   1  103.59    8.70
  -7   2  -1   98.49    7.20
  -8  -2  -1 1042.70   46.40
   8  -2   1 1082.79   46.80
  -8  -2  -1  967.10   57.89
   8  -2   1 1006.50   46.10
  -8  -2  -1  890.21   54.79
  -8   2  -1 1053.99   50.29
  -8   2  -1 1001.30   45.60
  -8   2  -1 1041.70   44.00
   8   2   1 1017.20   48.90
   8   2   1 1034.80   43.10
   8   2   1 1057.39   43.20
  -8   2  -1 1044.10   44.20
  -8   2  -1 1024.30   43.80
   9  -2   1  332.97   17.30
   9  -2   1  349.17   18.50
  -9  -2  -1  375.76   18.70
   9   2   1  321.97   23.20
   9   2   1  345.17   15.80
  -9   2  -1  363.76   16.20
  -9   2  -1  371.56   18.30
  -9   2  -1  360.96   19.00
   9   2   1  337.77   15.70
   9   2   1  354.96   17.70
  -9   2  -1  356.36   16.30
 -10  -2  -1  687.43   28.90
  10  -2   1  656.73   29.10
  10  -2   1  623.74   29.80
 -10   2  -1  691.63   28.50
  10   2   1  603.44   28.90
  10   2   1  645.04   28.10
 -10   2  -1  615.44   28.50
 -11  -3   1    6.10    1.10
 -11  -3   1    6.90    4.00
  11  -3  -1   10.60    2.40
  11   3  -1    6.80    1.80
 -11   3   1    7.00    1.90
  10  -3  -1  297.97   16.70
 -10  -3   1  332.47   18.60
  10  -3  -1  347.87   17.60
 -10  -3   1  351.36   33.50
  10   3  -1  373.16   16.30
  10   3  -1  353.46   15.70
  10   3  -1  383.86   19.60
 -10   3   1  343.57   17.00
 -10   3   1  367.76   15.30
  10   3  -1  354.96   16.50
   9  -3  -1  194.78   11.80
  -9  -3   1  197.98   11.30
   9  -3  -1  186.98   10.60
  -9   3   1  201.98   10.20
  -9   3   1  166.18   11.40
   9   3  -1  194.18   10.10
  -9   3   1  197.68   10.80
   9   3  -1  208.18   11.00
  -9   3   1  186.08   11.20
   9   3  -1  187.58   11.10
  -8  -3   1   26.70    9.50
   8  -3  -1   23.90    3.90
  -8  -3   1   20.00    3.20
  -8  -3   1    9.10    6.50
   8  -3  -1   23.80    3.60
   8   3  -1   17.60    2.80
  -8   3   1   21.60    3.50
  -8   3   1   23.20    3.00
  -8   3   1   24.30    5.30
  -8   3   1   21.60    3.30
   8   3  -1   20.50    2.60
   8   3  -1   21.20    3.30
  -7  -3   1  307.47   23.10
   7  -3  -1  315.07   16.30
  -7  -3   1  325.57   23.20
   7  -3  -1  303.87   16.80
  -7  -3   1  308.07   16.50
   7   3  -1  303.07   14.90
  -7   3   1  314.97   15.60
   7   3  -1  266.37   16.10
   7   3  -1  300.27   15.00
  -7   3   1  313.47   16.90
   7   3  -1  290.37   16.80
   7   3  -1  304.37   14.90
  -7   3   1  322.57   20.50
  -7   3   1  300.57   15.70
  -7   3   1  342.37   16.00
   6  -3  -1  642.44   28.90
   6  -3  -1  589.34   30.10
   6  -3  -1  597.34   27.90
  -6  -3   1  645.74   35.00
  -6  -3   1  598.94   28.10
   6  -3  -1  632.94   28.70
   6   3  -1  599.74   26.70
  -6   3   1  634.34   27.30
   6   3  -1  589.34   27.70
   6   3  -1  549.95   27.80
   6   3  -1  624.94   26.50
  -6   3   1  594.14   27.30
  -6   3   1  597.24   31.20
   6   3  -1  564.64   26.40
  -6   3   1  592.84   28.30
  -6   3   1  617.74   27.50
   5  -3  -1  538.85   25.90
   5  -3  -1  559.04   26.50
  -5  -3   1  521.35   25.50
   5  -3  -1  587.34   28.10
   5  -3  -1  539.35   25.60
  -5  -3   1  583.64   31.40
  -5  -3   1  578.64   30.50
  -5   3   1  560.74   25.10
   5   3  -1  547.95   25.00
  -5   3   1  606.44   28.80
   5   3  -1  549.15   24.40
   5   3  -1  525.25   24.10
  -5   3   1  574.84   24.90
  -4  -3   1  359.06   20.10
   4  -3  -1  321.57   17.50
  -4  -3   1  311.37   18.00
   4   3  -1  276.27   14.10
   4   3  -1  322.07   14.10
   4   3  -1  308.27   14.80
  -4   3   1  325.97   15.00
  -4   3   1  307.47   14.60
  -4   3   1  309.27   17.30
  -3  -3   1 2542.55  106.99
  -3  -3   1 2652.43  104.19
   3  -3  -1 2609.64  105.29
   3  -3  -1 2469.85  108.39
  -3   3   1 2607.84  101.79
   3   3  -1 2391.86  100.99
  -3   3   1 2642.84  104.89
   3   3  -1 2343.47  102.09
  -2  -3   1 3737.23  141.09
  -2  -3   1 3290.07  136.49
  -2  -3   1 3536.25  141.89
  -2  -3   1 3430.06  136.59
   2  -3  -1 3619.44  140.89
   2  -3  -1 3844.72  139.29
  -2   3   1 3187.88  136.99
   2   3  -1 3369.56  137.99
   2   3  -1 3304.47  136.89
  -2   3   1 3092.89  142.49
   1  -3  -1  234.58   13.00
  -1  -3   1  247.28   13.80
   1  -3  -1  246.08   12.70
  -1  -3   1  240.38   13.80
   1  -3  -1  251.67   13.60
   1   3  -1  236.38   11.50
  -1   3   1  237.58   12.30
   0  -3  -1 7431.46  297.77
  -1  -3  -1  582.34   27.30
  -1  -3  -1  581.74   28.20
   1  -3   1  596.54   27.30
  -1  -3  -1  625.24   28.20
   1  -3   1  571.84   28.20
   1  -3   1  663.63   25.00
   1   3   1  606.24   25.40
   1   3   1  538.85   24.10
   1   3   1  566.44   26.20
   2  -3   1 3102.69  114.69
  -2  -3  -1 2870.11  115.49
   2  -3   1 2663.63  114.49
  -2  -3  -1 2843.32  115.49
   2   3   1 2557.84  110.49
   2   3   1 2856.11  111.99
  -2   3  -1 2577.24  109.89
   2   3   1 2572.44  109.89
   3  -3   1   62.99    6.60
  -3  -3  -1   57.69    7.30
   3  -3   1   62.89    8.00
  -3  -3  -1   62.09    6.90
   3   3   1   50.69    3.90
   3   3   1   60.19    4.80
  -3   3  -1   62.79    4.00
   4  -3   1 1074.09   48.70
   4  -3   1  938.91   46.20
  -4  -3  -1 1012.60   50.19
  -4  -3  -1 1080.69   51.99
   4   3   1 1067.29   43.60
  -4   3  -1 1097.69   44.00
   4   3   1  984.00   43.30
   4   3   1 1104.19   45.30
  -4   3  -1 1037.80   44.20
   5  -3   1  296.47   16.10
  -5  -3  -1  312.97   22.80
   5  -3   1  277.97   16.30
   5  -3   1  328.27   19.50
  -5  -3  -1  300.57   21.20
  -5   3  -1  288.07   16.70
   5   3   1  274.97   15.50
  -5   3  -1  303.57   15.30
  -5   3  -1  346.17   18.80
   5   3   1  306.17   14.50
   5   3   1  309.37   14.60
  -5   3  -1  293.67   15.30
   5   3   1  293.57   16.00
  -6  -3  -1  341.07   24.90
   6  -3   1  312.97   20.70
   6  -3   1  294.07   16.80
  -6  -3  -1  364.66   29.20
   6  -3   1  268.47   21.00
  -6   3  -1  294.17   16.80
  -6   3  -1  306.17   15.60
   6   3   1  287.47   14.80
   6   3   1  299.77   15.10
   6   3   1  337.77   17.00
   6   3   1  298.07   16.80
   6   3   1  301.67   16.50
  -6   3  -1  279.37   19.90
  -6   3  -1  323.67   16.00
   7  -3   1  194.58   11.80
  -7  -3  -1  188.78   18.30
  -7  -3  -1  169.08   17.80
  -7  -3  -1  182.58   11.70
  -7   3  -1  174.98   10.40
   7   3   1  194.78   11.60
   7   3   1  170.28    9.80
   7   3   1  169.68    9.80
  -7   3  -1  177.88   10.60
  -7   3  -1  174.98   11.50
   7   3   1  171.38    9.60
  -7   3  -1  180.38   10.70
   7   3   1  160.28   12.20
  -8  -3  -1  148.69   19.20
  -8  -3  -1  145.59    9.80
   8  -3   1  141.79    9.70
   8  -3   1  139.49    9.20
  -8   3  -1  142.99    8.90
  -8   3  -1  145.79    9.90
   8   3   1  144.69    9.60
  -8   3  -1  144.09    9.10
   8   3   1  142.79    8.00
   8   3   1  137.89    8.10
  -8   3  -1  143.69    8.60
   8   3   1  141.49    8.20
   9  -3   1  276.07   14.70
  -9  -3  -1  279.27   14.60
   9  -3   1  284.27   14.30
   9   3   1  293.47   13.00
   9   3   1  257.67   13.30
   9   3   1  290.17   14.60
   9   3   1  290.17   14.00
  -9   3  -1  286.47   14.80
  -9   3  -1  286.77   13.40
  -9   3  -1  270.37   14.40
 -10  -3  -1  163.08   20.60
  10  -3   1  208.08   11.50
  10  -3   1  186.48    9.50
  10   3   1  163.48    7.80
 -10   3  -1  189.48    9.80
  10   3   1  188.08   10.10
  10  -4  -1   42.30    3.10
  10  -4  -1   49.70    3.90
 -10   4   1   42.70    3.50
  10   4  -1   41.50    4.20
 -10   4   1   38.50    3.40
  10   4  -1   45.90    3.00
  10   4  -1   51.59    3.30
  -9  -4   1  501.85   44.20
  -9  -4   1  558.24   24.40
   9  -4  -1  560.84   25.70
   9  -4  -1  527.85   25.10
   9   4  -1  574.04   24.40
  -9   4   1  567.54   25.00
  -9   4   1  585.84   24.70
  -9   4   1  542.85   25.50
   9   4  -1  567.44   25.40
   9   4  -1  572.94   24.50
  -9   4   1  560.24   24.50
   9   4  -1  562.94   24.40
  -8  -4   1 1877.91   76.09
  -8  -4   1 1771.92   82.49
   8  -4  -1 1737.83   76.39
  -8  -4   1 1908.51  109.09
   8  -4  -1 1904.21   77.39
   8   4  -1 1847.42   75.59
  -8   4   1 1821.52   77.09
  -8   4   1 1843.32   76.29
   8   4  -1 1782.62   76.79
   8   4  -1 1859.71   75.59
  -8   4   1 1815.12   75.99
  -8   4   1 1820.82   76.19
   8   4  -1 1893.01   75.59
  -7  -4   1   71.09   16.10
   7  -4  -1   74.89    6.10
   7  -4  -1   75.19    6.30
  -7  -4   1   74.79    5.80
  -7  -4   1   82.39   12.60
  -7   4   1   84.99    6.20
   7   4  -1   71.39    5.20
  -7   4   1   71.99    5.60
  -7   4   1   64.79    6.30
  -7   4   1   71.79    5.90
   7   4  -1   68.19    5.30
   7   4  -1   74.89    5.40
   6  -4  -1  748.93   33.40
  -6  -4   1  708.23   35.80
   6  -4  -1  656.13   37.60
  -6  -4   1  759.22   32.00
  -6  -4   1  703.23   40.40
   6  -4  -1  731.43   32.50
   6  -4  -1  710.53   32.40
  -6   4   1  696.13   31.60
   6   4  -1  677.93   32.20
  -6   4   1  686.33   37.10
  -6   4   1  721.43   31.50
   6   4  -1  666.53   30.50
   6   4  -1  687.23   31.00
  -6   4   1  702.93   37.00
   6   4  -1  694.93   31.00
  -6   4   1  742.23   31.90
  -5  -4   1  550.54   46.50
   5  -4  -1  537.45   24.60
   5  -4  -1  531.55   24.70
   5  -4  -1  537.65   28.40
  -5  -4   1  526.95   31.20
   5  -4  -1  535.25   25.60
  -5  -4   1  520.75   23.60
  -5  -4   1  570.44   26.90
   5   4  -1  532.55   24.30
   5   4  -1  460.85   22.90
  -5   4   1  508.35   23.90
  -5   4   1  491.35   23.90
  -5   4   1  476.85   24.50
  -5   4   1  519.75   23.70
  -5   4   1  515.25   28.00
   4  -4  -1  147.69   11.40
  -4  -4   1  148.39    8.50
  -4  -4   1  174.88   26.80
   4  -4  -1  137.79    8.50
   4  -4  -1  138.39    9.50
   4  -4  -1  136.49    8.80
  -4  -4   1  132.09   12.40
   4   4  -1  138.39    7.30
  -4   4   1  136.19    7.80
  -4   4   1  157.58   11.40
   4   4  -1  144.99    8.70
  -4   4   1  135.29    8.20
   4   4  -1  123.39    7.40
  -3  -4   1  188.48   14.00
   3  -4  -1  171.48   13.60
   3  -4  -1  184.58   12.70
   3  -4  -1  186.18   13.90
  -3   4   1  167.58    8.90
  -3   4   1  164.68    9.30
   3   4  -1  179.78    9.80
  -3   4   1  184.28   11.90
  -2  -4   1  256.57   17.00
   2  -4  -1  296.37   15.00
   2  -4  -1  280.07   16.80
   2  -4  -1  298.47   19.60
  -2  -4   1  289.17   16.80
   2   4  -1  261.37   12.50
   2   4  -1  270.57   13.80
  -2   4   1  279.87   15.40
   1  -4  -1 2107.39   82.09
   1  -4  -1 2081.19   85.39
  -1  -4   1 2032.40   85.59
  -1  -4   1 2023.40   85.59
   1  -4  -1 2052.29   83.69
  -1   4   1 1869.71   79.79
   1   4  -1 1975.30   82.19
   1   4  -1 1880.81   81.39
  -1   4   1 1899.11   82.59
   0  -4  -1  315.87   14.70
   0  -4   1  289.37   17.50
   0  -4  -1  309.37   17.30
   0  -4  -1  301.37   16.80
   0  -4   1  297.47   17.00
   0  -4  -1  302.67   14.20
   0   4  -1  269.77   15.00
   0   4   1  287.67   14.70
   0   4   1  283.87   12.60
  -1  -4  -1  227.38   14.40
   1  -4   1  214.98   13.20
   1  -4   1  233.38   14.90
  -1  -4  -1  232.08   12.00
   1   4   1  225.58   11.50
   1   4   1  218.18   12.20
   1   4   1  203.38    9.60
  -1   4  -1  187.38   12.30
  -2  -4  -1 1152.38   53.49
  -2  -4  -1 1217.08   51.09
   2  -4   1 1090.59   55.99
   2   4   1 1083.19   49.20
  -2   4  -1 1193.18   47.20
  -2   4  -1 1108.89   51.69
   2   4   1 1185.18   48.00
   2   4   1 1140.89   46.80
   3  -4   1  213.08   15.30
   3  -4   1  229.88   13.90
   3  -4   1  201.68   12.40
  -3  -4  -1  214.18   14.50
  -3  -4  -1  220.98   16.20
  -3  -4  -1  191.18   10.70
  -3   4  -1  217.08   10.60
  -3   4  -1  204.28   11.00
   3   4   1  204.48   10.50
   3   4   1  221.78   12.30
   3   4   1  222.78   10.40
   4  -4   1 1003.90   47.50
  -4  -4  -1 1118.69   54.49
  -4  -4  -1 1119.59   45.90
  -4  -4  -1 1170.98   53.09
   4  -4   1 1094.39   52.59
   4  -4   1 1084.99   47.60
   4  -4   1 1082.89   46.50
   4  -4   1 1092.49   48.70
  -4   4  -1 1138.79   46.60
   4   4   1 1059.99   47.20
   4   4   1 1040.80   47.60
  -4   4  -1 1120.59   50.19
  -4   4  -1 1105.99   51.49
   4   4   1 1067.19   45.80
   4   4   1 1074.89   45.70
   5  -4   1  347.37   19.00
   5  -4   1  374.96   23.90
   5  -4   1  389.46   18.90
  -5   4  -1  373.16   23.30
  -5   4  -1  368.26   18.50
  -5   4  -1  391.16   18.70
   5   4   1  378.06   19.80
   5   4   1  377.46   17.80
  -5   4  -1  358.56   19.40
   5   4   1  394.06   19.30
   5   4   1  405.96   18.10
  -5   4  -1  367.96   18.20
  -6  -4  -1  493.15   33.00
   6  -4   1  476.35   30.30
   6  -4   1  519.85   25.50
   6  -4   1  506.25   25.00
  -6  -4  -1  505.35   24.80
  -6  -4  -1  507.65   31.30
   6  -4   1  546.45   24.70
   6   4   1  533.85   23.80
   6   4   1  495.95   25.70
   6   4   1  535.65   25.00
  -6   4  -1  514.55   24.10
  -6   4  -1  488.25   24.00
   6   4   1  515.15   23.40
   6   4   1  501.95   23.10
  -6   4  -1  506.55   25.10
  -6   4  -1  532.25   24.40
  -7  -4  -1  159.88   22.70
   7   4   1  217.88   11.20
  -7   4  -1  204.68   11.80
  -7   4  -1  214.38   14.20
  -7   4  -1  212.08   11.90
   7   4   1  236.48   16.50
   7   4   1  198.88   11.10
   8  -4   1  118.89    8.10
  -8  -4  -1  130.79    8.20
   8  -4   1  138.59    8.40
  -8   4  -1  124.49    8.40
  -8   4  -1  130.49    7.90
  -8   4  -1  145.29    8.40
   8   4   1  134.39    7.60
   8   4   1  128.49    7.40
  -8   4  -1  130.29    8.70
   8   4   1  136.69    7.90
   9  -4   1  189.18    9.70
  -9  -4  -1  159.88   20.20
  -9  -4  -1  186.98    9.20
   9  -4   1  194.38    9.50
   9   4   1  187.98    8.80
  -9   4  -1  184.18    9.00
   9   4   1  178.58    9.80
   9   4   1  181.58    9.20
  -9   4  -1  187.88    9.30
  -9   4  -1  180.38    9.90
   9  -5  -1   72.99    5.10
  -9  -5   1   70.99   12.50
  -9   5   1   76.79    4.50
   9   5  -1   75.69    4.90
  -9   5   1   74.49    5.00
   9   5  -1   71.29    4.80
   9   5  -1   78.59    4.60
  -9   5   1   76.19    4.80
  -8  -5   1   98.89   17.10
   8  -5  -1  118.79    7.00
   8  -5  -1  115.19    7.30
   8   5  -1  141.19   11.00
   8   5  -1  114.39    6.80
  -8   5   1  120.99    7.80
  -8   5   1  118.69    7.50
  -8   5   1  113.59    7.20
   8   5  -1  102.69    8.80
  -8   5   1  115.19    6.90
  -7  -5   1  143.19   22.70
   7  -5  -1  151.28    9.00
   7  -5  -1  147.99    9.40
  -7   5   1  153.58    9.10
   7   5  -1  149.69    8.60
   7   5  -1  161.68    8.70
  -7   5   1  146.29    9.10
   7   5  -1  150.88    8.50
   7   5  -1  152.98    9.30
  -7   5   1  146.39    9.30
  -7   5   1  150.48    8.90
  -6  -5   1  254.37   31.40
   6  -5  -1  277.07   14.20
  -6  -5   1  256.77   24.00
   6  -5  -1  271.87   14.80
  -6   5   1  267.97   14.00
   6   5  -1  257.97   13.50
  -6   5   1  263.07   14.10
   6   5  -1  275.17   13.70
   6   5  -1  256.97   13.30
  -6   5   1  298.47   15.40
  -6   5   1  268.27   14.40
   5  -5  -1   13.30    2.70
   5  -5  -1    8.10    2.80
   5  -5  -1   11.90    2.30
   5  -5  -1   15.80    3.60
   5  -5  -1    8.00    6.90
  -5  -5   1    7.90    5.80
  -5  -5   1    3.80    6.50
   5   5  -1    8.40    1.80
   5   5  -1    8.20    1.90
  -5   5   1    9.60    2.30
  -5   5   1   11.10    2.40
  -5   5   1   11.40    2.80
   4  -5  -1  598.34   33.00
   4  -5  -1  628.14   27.50
  -4  -5   1  609.14   38.30
   4  -5  -1  627.84   30.40
  -4  -5   1  626.14   49.30
   4  -5  -1  636.04   31.80
   4  -5  -1  593.34   28.50
  -4  -5   1  621.84   27.10
   4  -5  -1  661.53   31.10
   4   5  -1  574.44   26.70
   4   5  -1  630.44   26.70
  -4   5   1  612.14   27.30
   4   5  -1  613.74   28.60
  -4   5   1  574.44   27.70
  -4   5   1  605.84   27.70
  -4   5   1  693.23   34.80
  -3  -5   1  485.45   28.40
  -3  -5   1  526.35   41.60
   3  -5  -1  450.35   22.90
   3  -5  -1  424.76   22.10
   3  -5  -1  451.95   22.10
  -3  -5   1  434.26   20.90
   3  -5  -1  462.85   26.40
   3  -5  -1  482.35   20.80
  -3  -5   1  472.35   22.20
   3   5  -1  452.95   22.20
  -3   5   1  436.76   21.00
  -3   5   1  455.35   24.90
   2  -5  -1  520.75   23.10
  -2  -5   1  455.25   21.40
   2  -5  -1  448.46   22.00
   2  -5  -1  453.95   26.00
   2  -5  -1  493.45   23.20
  -2  -5   1  438.06   26.70
  -2  -5   1  498.95   40.10
  -2  -5   1  449.26   22.30
  -2   5   1  449.95   20.30
   2   5  -1  520.95   25.70
   2   5  -1  438.16   19.30
  -2   5   1  412.56   20.70
  -2   5   1  489.25   24.40
   1  -5  -1 1248.48   57.19
  -1  -5   1 1163.78   52.29
  -1  -5   1 1222.18   57.19
   1  -5  -1 1335.07   55.49
  -1  -5   1 1224.78   53.19
  -1  -5   1 1248.78   57.49
   1  -5  -1 1172.98   52.09
   1  -5  -1 1220.08   52.99
   1  -5  -1 1220.28   52.89
  -1   5   1 1292.67   54.89
  -1   5   1 1179.38   50.19
   1   5  -1 1244.18   52.49
   0  -5  -1  374.96   17.70
   0  -5   1  324.47   17.80
   0  -5   1  346.47   17.00
   0  -5  -1  341.67   16.70
   0  -5  -1  352.46   20.30
   0  -5   1  335.07   18.30
   0  -5   1  347.97   21.70
   0  -5   1  342.17   20.10
   0   5  -1  318.57   17.90
   0   5   1  328.37   14.80
   0   5   1  372.36   19.20
   0   5   1  325.17   17.40
  -1  -5  -1  820.62   41.90
  -1  -5  -1  825.72   36.80
   1  -5   1  876.01   37.60
   1  -5   1  876.91   43.40
   1  -5   1  859.61   38.60
  -1  -5  -1  883.51   37.80
   1  -5   1  890.81   39.30
   1  -5   1  866.01   40.60
   1   5   1  872.81   37.60
   1   5   1  896.81   39.20
  -1   5  -1  780.32   34.80
   1   5   1  778.62   35.00
   2  -5   1    9.10    4.80
  -2  -5  -1    6.30    1.60
   2  -5   1    5.30    2.10
   2  -5   1    4.60    2.30
   2  -5   1   10.00    3.20
  -2  -5  -1    7.00    4.00
   2   5   1   10.40    1.80
  -2   5  -1    8.30    1.70
  -2   5  -1    7.30    4.20
   2   5   1    6.30    2.00
   3  -5   1 1379.76   58.49
   3  -5   1 1407.56   58.09
   3  -5   1 1325.77   58.99
  -3  -5  -1 1397.96   56.39
  -3  -5  -1 1446.56   81.19
  -3  -5  -1 1337.57   64.79
   3  -5   1 1364.56   64.09
   3   5   1 1204.58   55.59
  -3   5  -1 1299.77   55.69
  -3   5  -1 1347.37   56.29
   3   5   1 1315.67   55.49
   3   5   1 1366.26   58.59
  -3   5  -1 1303.97   61.69
  -4  -5  -1  905.51   37.00
   4  -5   1  880.21   38.90
   4  -5   1  846.32   38.80
   4  -5   1  862.11   35.90
  -4  -5  -1  797.62   65.79
   4  -5   1  837.62   44.50
   4  -5   1  905.71   40.20
  -4  -5  -1  831.62   46.20
  -4   5  -1  839.62   37.40
   4   5   1  825.12   39.30
  -4   5  -1  879.41   37.20
   4   5   1  865.71   37.00
   4   5   1  831.52   37.20
   4   5   1  904.61   36.90
   5  -5   1   28.50    4.00
   5  -5   1   33.00    9.00
  -5  -5  -1   27.60   10.20
   5  -5   1   29.10    3.60
   5  -5   1   22.30    2.80
  -5  -5  -1   33.10    3.30
  -5  -5  -1   26.30    3.40
   5  -5   1   23.20    4.00
  -5  -5  -1   19.60    7.30
  -5   5  -1   24.80    3.80
   5   5   1   28.50    3.30
   5   5   1   21.40    3.00
   5   5   1   26.60    4.00
  -5   5  -1   30.80    3.90
   5   5   1   20.40    5.10
  -5   5  -1   24.30    3.40
  -5   5  -1   24.80    4.20
  -6  -5  -1  210.08   10.90
  -6  -5  -1  205.18   27.20
   6  -5   1  182.48   12.10
   6  -5   1  200.48   10.70
   6  -5   1  260.87   16.20
  -6   5  -1  218.58   12.10
  -6   5  -1  227.08   12.00
   6   5   1  199.98   11.40
   6   5   1  213.98   11.30
   6   5   1  218.08   12.30
  -6   5  -1  222.98   12.00
  -6   5  -1  210.78   12.30
   6   5   1  212.38   11.10
   7  -5   1    3.30    1.30
  -7  -5  -1    4.60    1.30
  -7  -5  -1    1.90    4.40
   7  -5   1    2.40    1.40
   7   5   1    4.30    1.40
  -7   5  -1    4.60    1.80
  -7   5  -1    7.30    2.10
   7   5   1    8.00    1.60
  -7   5  -1    5.70    1.60
   7   5   1    3.50    1.40
  -7   5  -1    6.50    1.80
   7   5   1    4.00    1.50
   8  -5   1   45.70    4.00
  -8  -5  -1   34.10    8.70
   8   5   1   45.40    3.90
  -8   5  -1   49.00    3.80
   8   5   1   43.40    3.70
   8   5   1   42.00    3.50
  -8   5  -1   52.39    4.00
   8   5   1   47.10    3.40
  -8   5  -1   46.50    4.20
  -8   5  -1   46.40    3.70
  -9  -5  -1  311.87   22.20
   9  -5   1  355.16   14.90
   9   5   1  305.07   15.10
  -9   5  -1  353.46   15.00
  -9   5  -1  340.47   15.40
   9   5   1  329.27   14.90
   9   5   1  357.06   15.00
   8  -6  -1  489.85   20.90
  -8   6   1  439.56   19.40
   8   6  -1  433.76   19.30
   8   6  -1  439.46   19.40
  -8   6   1  446.46   19.90
  -8   6   1  453.45   19.70
  -8   6   1  411.06   21.90
  -7  -6   1  329.67   34.00
   7  -6  -1  290.77   15.40
   7   6  -1  309.77   14.70
  -7   6   1  342.27   15.40
  -7   6   1  327.07   15.40
  -7   6   1  310.67   15.00
   7   6  -1  315.27   14.70
   7   6  -1  319.47   14.90
  -7   6   1  315.67   15.30
  -6  -6   1    8.30    6.20
   6  -6  -1   11.60    2.30
   6   6  -1   15.50    2.40
  -6   6   1   17.60    2.60
  -6   6   1   14.30    2.60
  -6   6   1   10.90    3.20
   6   6  -1   15.30    2.50
  -5  -6   1  149.99   22.20
   5   6  -1  166.58    9.40
  -5   6   1  175.68    9.60
   5   6  -1  172.28    9.00
  -5   6   1  175.78    9.80
  -5   6   1  161.58    9.60
  -5   6   1  171.18    9.70
   4  -6  -1  476.35   23.20
   4  -6  -1  452.05   22.00
  -4  -6   1  510.55   42.50
   4  -6  -1  446.36   22.30
  -4  -6   1  483.95   20.80
  -4   6   1  456.95   21.00
   4   6  -1  446.46   20.60
  -4   6   1  436.96   21.20
  -4   6   1  406.46   21.10
   3  -6  -1  237.28   19.20
  -3  -6   1  268.17   20.80
  -3  -6   1  324.57   31.80
   3  -6  -1  290.37   15.80
  -3  -6   1  261.27   13.80
   3  -6  -1  282.17   15.20
   3  -6  -1  277.97   15.20
  -3   6   1  269.97   13.50
   3   6  -1  307.57   13.20
   2  -6  -1   71.59    5.90
  -2  -6   1   74.09   15.00
  -2  -6   1   70.49    9.90
  -2  -6   1   69.39    6.20
   2  -6  -1   68.89    6.00
   2  -6  -1   78.59    6.50
  -2  -6   1   68.79    5.30
  -2   6   1   69.09    4.70
   2   6  -1   63.79    4.20
  -2   6   1   63.09    5.30
   1  -6  -1  435.56   23.60
  -1  -6   1  425.66   19.80
   1  -6  -1  439.36   20.30
  -1  -6   1  394.56   35.40
  -1  -6   1  403.36   20.80
   1  -6  -1  437.86   23.20
   1  -6  -1  430.96   20.90
  -1  -6   1  377.96   20.40
  -1  -6   1  435.46   25.50
  -1   6   1  413.16   18.00
   1   6  -1  403.56   21.70
  -1   6   1  369.46   18.30
  -1   6   1  350.56   21.90
   0  -6  -1   19.00    3.00
   0  -6   1   24.70    5.90
   0  -6   1   22.20    7.20
   0  -6   1   24.40    4.00
   0  -6  -1   17.30    9.80
   0  -6   1   30.60    3.60
   0  -6  -1   24.00    3.70
   0   6   1   35.80    8.60
   0   6   1   21.90    2.50
   0   6   1   26.20    5.20
   0   6  -1   17.90    4.40
   1  -6   1  122.89    9.10
   1  -6   1  134.49    8.60
   1  -6   1  119.29    9.10
   1  -6   1  119.29   13.00
  -1  -6  -1  129.29   12.90
  -1  -6  -1  128.99    8.00
  -1   6  -1  127.79   11.90
   1   6   1  126.39    6.80
   1   6   1  110.69    7.20
   1   6   1  116.49   10.00
  -1   6  -1  121.59    6.60
   2  -6   1  698.63   32.20
  -2  -6  -1  669.13   30.10
   2  -6   1  666.33   38.20
   2  -6   1  697.73   32.70
   2  -6   1  684.53   31.30
  -2  -6  -1  673.13   37.70
   2   6   1  660.23   29.00
  -2   6  -1  691.43   29.20
   2   6   1  656.53   33.00
   2   6   1  660.43   29.40
   3  -6   1 1523.95   63.99
   3  -6   1 1321.87   69.59
   3  -6   1 1535.55   62.89
   3  -6   1 1431.96   62.99
  -3  -6  -1 1478.55   61.09
  -3  -6  -1 1444.26   70.99
  -3   6  -1 1463.35   61.09
  -3   6  -1 1510.75   60.69
   3   6   1 1321.47   63.79
   3   6   1 1498.15   60.79
   3   6   1 1549.45   60.69
   4  -6   1   13.40    3.20
   4  -6   1   15.50    3.10
  -4  -6  -1    3.50    7.90
  -4   6  -1   13.50    4.40
   4   6   1   10.30    2.10
   4   6   1    8.80    1.90
  -4   6  -1   13.40    2.70
  -4   6  -1   10.80    2.20
   5  -6   1  224.98   12.90
   5  -6   1  241.88   13.80
  -5  -6  -1  227.18   24.80
   5  -6   1  242.08   14.30
  -5   6  -1  263.77   13.20
   5   6   1  264.07   12.90
  -5   6  -1  254.47   13.20
  -5   6  -1  264.27   13.00
   5   6   1  253.67   12.40
   5   6   1  237.78   12.50
   6  -6   1   53.99    5.00
  -6  -6  -1   47.40   10.30
   6  -6   1   62.39    5.50
  -6   6  -1   65.79    4.80
   6   6   1   62.39    4.70
  -6   6  -1   64.79    5.00
   6   6   1   53.09    6.50
  -6   6  -1   62.29    5.10
   6   6   1   68.79    4.50
  -6   6  -1   53.79    6.40
  -7  -6  -1  342.87   27.40
   7  -6   1  414.86   19.10
   7   6   1  431.36   18.40
   7   6   1  391.86   18.70
   7   6   1  424.06   18.40
  -7   6  -1  391.26   18.60
  -7   6  -1  410.86   18.40
  -7   6  -1  426.26   18.80
   7   6   1  431.16   18.20
  -7   6  -1  434.06   18.80
   8  -6   1   46.00    3.30
   8   6   1   42.10    3.30
  -8   6  -1   46.10    4.20
  -8   6  -1   45.80    3.70
   8   6   1   34.60    3.20
   7  -7  -1   96.19    5.60
  -7   7   1  101.59    5.50
  -7   7   1  116.79    6.90
   7   7  -1   99.19    5.10
   7   7  -1   91.69    5.50
   6  -7  -1  242.68   12.20
   6   7  -1  238.38   11.40
   6   7  -1  227.78   11.30
  -6   7   1  240.18   11.40
  -6   7   1  261.17   12.30
   6   7  -1  239.18   11.30
  -6   7   1  245.08   11.70
   5  -7  -1  144.09    8.70
  -5   7   1  155.48    8.10
  -5   7   1  146.79    7.90
   5   7  -1  139.79    7.60
  -5   7   1  142.99    8.10
   4  -7  -1   42.20    4.20
  -4   7   1   42.50    3.80
   4   7  -1   45.40    4.30
  -4   7   1   41.40    3.90
  -4   7   1   49.90    4.20
  -3  -7   1  203.78   10.80
   3  -7  -1  231.28   12.30
  -3   7   1  214.68   13.10
  -3   7   1  204.28   11.90
  -2  -7   1   74.59    5.40
   2  -7  -1   70.79    6.10
  -2   7   1   72.49    4.90
  -2   7   1   83.79    5.50
   1  -7  -1  708.03   34.60
  -1  -7   1  842.02   41.40
  -1   7   1  732.33   31.90
  -1   7   1  719.53   31.50
   0  -7   1  126.09    9.20
   0  -7  -1  126.09    9.10
   0  -7   1  146.59    9.00
   0   7   1  129.59    7.30
   0   7   1  122.49    7.80
   1  -7   1   29.20    3.90
  -1  -7  -1   27.90    3.80
   1  -7   1   31.60    3.90
  -1   7  -1   30.10    3.30
   1   7   1   24.90    4.00
   1   7   1   22.80    3.00
   2  -7   1  330.17   16.90
   2  -7   1  322.67   17.40
   2  -7   1  325.07   17.30
  -2  -7  -1  347.27   16.00
  -2   7  -1  316.47   17.30
   2   7   1  317.17   15.40
   3  -7   1  912.81   40.40
   3  -7   1  932.81   41.20
  -3  -7  -1  972.10   39.20
   3  -7   1  904.91   40.60
  -3   7  -1  913.91   39.20
   3   7   1  891.41   38.80
   3   7   1  919.71   39.10
  -3   7  -1  914.71   38.70
   4  -7   1   44.80    4.10
   4  -7   1   47.80    4.50
   4  -7   1   49.40    4.80
   4   7   1   41.40    3.80
   4   7   1   47.80    3.90
  -4   7  -1   38.50    3.80
  -4   7  -1   40.90    4.00
   5  -7   1   62.19    4.90
   5   7   1   58.89    4.30
  -5   7  -1   57.59    4.40
   5   7   1   59.69    4.30
  -5   7  -1   58.49    6.20
  -5   7  -1   45.70    5.60
   5   7   1   61.49    4.50
   6  -7   1   67.79    4.80
  -6   7  -1   68.39    4.70
   6   7   1   76.29    5.80
   6   7   1   73.19    4.50
  -6   7  -1   78.39    4.80
   5  -8  -1   15.20    1.80
  -5   8   1   11.70    1.70
   4  -8  -1  249.38   11.70
  -4   8   1  227.38   10.80
  -4   8   1  229.18   11.90
   3  -8  -1   88.09    6.00
  -3   8   1   82.79    5.30
  -2  -8   1   35.10    3.00
   2  -8  -1   36.80    3.50
  -2   8   1   31.60    3.70
  -2   8   1   39.40    4.00
   1  -8  -1   74.39    5.10
  -1  -8   1   74.39    6.30
  -1   8   1   66.89    5.50
   0  -8   1  320.17   14.70
   0  -8  -1  322.87   14.70
   0   8   1  259.97   14.00
   1  -8   1   54.69    4.60
  -1  -8  -1   50.69    4.00
   1   8   1   46.10    5.00
  -2  -8  -1  535.55   21.90
   2  -8   1  481.55   22.40
   2   8   1  474.05   22.30
   3   8   1   34.00    3.40
   4  -8   1  101.29    6.60
 -12   0   2   16.70    2.00
  12   0  -2   20.90    2.70
 -11   0   2    7.30    2.00
 -11   0   2    2.80    1.70
  11   0  -2    5.70    1.80
  11   0  -2    8.00    1.70
 -11   0   2    4.50    4.30
 -10   0   2 1187.38   49.80
 -10   0   2 1172.98   51.69
  10   0  -2 1193.98   52.39
  10   0  -2 1169.58   50.29
   9   0  -2 1133.29   50.19
   9   0  -2 1209.38   54.29
  -9   0   2 1215.78   53.69
   9   0  -2 1232.28   52.29
  -9   0   2 1294.57   52.29
   9   0  -2 1258.17   50.29
  -9   0   2 1148.09   67.79
  -8   0   2   -1.80    2.00
  -8   0   2   10.70    5.30
  -8   0   2   -8.40    6.00
   8   0  -2    1.50    1.20
  -8   0   2    5.90    2.70
   8   0  -2    2.80    1.60
   8   0  -2    1.80    1.40
   8   0  -2    4.10    1.40
   8   0  -2    0.80    2.10
  -8   0   2   -1.70    1.20
   7   0  -2   73.49    4.80
  -7   0   2   69.39    5.90
  -7   0   2   62.49    6.20
   7   0  -2   76.69    4.80
  -7   0   2   67.49   11.40
  -7   0   2   65.39    5.10
   7   0  -2   65.69    4.60
   7   0  -2   77.59    5.90
  -6   0   2  366.36   17.00
  -6   0   2  381.46   17.60
  -6   0   2  380.26   17.70
   6   0  -2  381.16   16.80
  -6   0   2  402.46   25.70
   6   0  -2  374.76   16.90
   5   0  -2  132.69    6.90
  -5   0   2  132.79    7.00
  -5   0   2  139.39    7.50
  -5   0   2  137.39   12.00
   5   0  -2  140.39    6.80
  -4   0   2  339.37   14.80
   4   0  -2  330.27   14.20
  -4   0   2  325.47   19.20
  -3   0   2 2651.73  100.19
  -3   0   2 2539.45  100.99
  -3   0   2 2503.55  103.99
   3   0  -2 2320.67   99.69
  -2   0   2 2228.98   87.79
  -2   0   2 2187.18   85.39
   2   0  -2 1955.60   85.29
  -2   0   2 2147.49   85.09
   0   0  -2   24.10    2.00
   0   0   2   26.40    2.00
   0   0  -2   23.10    3.10
   0   0   2   26.50    1.80
  -1   0  -2 4772.62  205.98
  -1   0  -2 5582.94  210.38
  -2   0  -2 6452.95  265.47
  -2   0  -2 6924.01  272.27
   3   0   2 1216.98   49.99
  -3   0  -2 1269.27   49.99
   3   0   2 1172.68   50.59
  -3   0  -2 1203.48   57.79
  -4   0  -2   13.40    2.10
   4   0   2   10.70    1.80
  -4   0  -2   14.20    2.50
   4   0   2   11.40    1.90
  -4   0  -2    5.40    4.80
  -5   0  -2  382.36   17.60
   5   0   2  354.16   20.60
  -5   0  -2  377.76   17.50
   5   0   2  367.86   16.60
  -5   0  -2  359.66   27.00
  -5   0  -2  365.06   18.80
   5   0   2  381.96   19.10
   5   0   2  380.86   16.80
  -5   0  -2  353.06   17.40
   5   0   2  382.86   16.60
   5   0   2  372.76   18.20
   6   0   2   45.00    3.70
  -6   0  -2   38.20    3.90
   6   0   2   35.20    4.00
   6   0   2   33.70    5.00
  -6   0  -2   34.40    3.90
   6   0   2   39.40    5.10
   6   0   2   36.00    3.00
  -6   0  -2   32.60    4.40
  -6   0  -2   31.10    4.10
   7   0   2  736.93   30.00
  -7   0  -2  723.23   33.50
  -7   0  -2  703.23   31.10
  -7   0  -2  734.33   31.00
   7   0   2  694.73   34.60
  -7   0  -2  698.53   34.60
   7   0   2  698.43   35.20
   8   0   2  154.08   11.40
   8   0   2  162.58    9.70
  -8   0  -2  157.58   11.40
  -8   0  -2  150.98   10.10
   9   0   2   64.19    6.20
  -9   0  -2   63.19    6.10
   9   0   2   67.59    4.90
  -9   0  -2   66.09    5.40
  10   0   2  421.26   19.00
 -10   0  -2  325.27   19.70
  10   0   2  405.86   16.70
 -10   0  -2  383.76   17.50
 -11  -1   2  487.95   20.80
  11  -1  -2  422.66   19.00
 -11  -1   2  368.46   32.30
  11  -1  -2  417.36   20.50
  11   1  -2  414.76   20.90
 -11   1   2  407.66   20.00
 -11   1   2  437.96   18.90
  10  -1  -2  298.87   14.40
  10  -1  -2  297.47   16.30
 -10  -1   2  301.27   15.90
  10   1  -2  298.67   15.10
  10   1  -2  293.87   13.30
 -10   1   2  271.97   15.60
  10   1  -2  257.97   13.30
  10   1  -2  278.67   16.20
 -10   1   2  285.97   14.70
   9  -1  -2 1317.77   56.79
  -9  -1   2 1086.29   62.59
   9  -1  -2 1122.79   53.39
  -9  -1   2 1268.67   69.29
   9  -1  -2 1342.67   54.39
  -9  -1   2 1316.57   55.99
  -9  -1   2 1300.47   53.59
  -9   1   2 1314.47   52.19
   9   1  -2 1212.78   56.39
   9   1  -2 1326.77   53.09
   9   1  -2 1331.67   53.09
  -9   1   2 1332.67   55.09
   9   1  -2 1279.77   54.79
  -9   1   2 1276.27   56.09
  -8  -1   2  410.06   27.50
   8  -1  -2  459.45   19.90
  -8  -1   2  442.86   23.00
   8  -1  -2  468.55   23.70
   8  -1  -2  461.45   21.80
  -8   1   2  471.05   22.50
  -8   1   2  473.55   24.90
   8   1  -2  423.76   23.50
   8   1  -2  465.65   20.60
  -8   1   2  452.55   20.60
   8   1  -2  453.85   20.60
  -8   1   2  472.55   20.60
   8   1  -2  474.55   20.60
   8   1  -2  454.95   22.10
  -8   1   2  453.35   34.80
  -8   1   2  414.16   20.70
  -7  -1   2 1054.19   47.90
   7  -1  -2 1081.89   45.10
  -7  -1   2 1127.09   52.49
   7  -1  -2 1078.89   48.50
  -7  -1   2 1049.49   46.40
   7  -1  -2 1103.29   46.60
   7  -1  -2 1081.99   45.00
   7  -1  -2 1115.19   45.30
  -7   1   2 1101.19   45.90
   7   1  -2 1067.49   47.00
  -7   1   2 1125.29   45.80
   7   1  -2 1109.89   45.50
  -7   1   2 1135.79   60.19
   7   1  -2 1100.49   45.50
  -7   1   2 1087.49   48.00
   7   1  -2 1095.79   45.30
  -7   1   2 1010.80   47.80
   7   1  -2  999.60   48.90
  -7   1   2 1139.59   45.90
  -7   1   2 1101.09   47.50
  -6  -1   2  832.52   43.20
  -6  -1   2  820.72   39.20
   6  -1  -2  852.41   33.80
   6  -1  -2  769.22   33.60
   6   1  -2  773.22   33.90
  -6   1   2  789.82   34.40
  -6   1   2  784.92   44.00
  -6   1   2  800.72   36.10
   6   1  -2  775.02   35.10
  -6   1   2  824.52   34.40
   6   1  -2  846.32   33.90
  -5  -1   2  170.58   13.50
  -5  -1   2  177.88   11.70
   5  -1  -2  167.48    8.30
  -5   1   2  184.78   14.80
   5   1  -2  160.28    8.30
  -5   1   2  173.58   10.00
  -5   1   2  174.48    8.90
   5   1  -2  202.88    9.40
  -4  -1   2 4599.54  185.18
   4  -1  -2 4388.46  179.38
   4  -1  -2 4577.94  179.38
  -4  -1   2 4627.34  182.88
   4   1  -2 4371.56  179.38
   4   1  -2 4318.27  179.68
  -4   1   2 4504.55  179.78
  -4   1   2 4621.14  181.18
  -4   1   2 4614.64  186.58
  -3  -1   2  253.57   14.00
  -3  -1   2  258.57   13.00
   3  -1  -2  258.17   11.00
   3   1  -2  237.88   10.80
   3   1  -2  249.78   10.80
  -3   1   2  263.27   12.10
  -3   1   2  238.98   14.70
  -3   1   2  255.57   11.20
  -2  -1   2 2262.67   90.49
  -2  -1   2 2289.37   89.29
  -2  -1   2 2285.57   90.19
   2  -1  -2 1929.91   89.59
   2   1  -2 2192.88   88.09
  -2   1   2 2329.67   89.39
  -2   1   2 2232.08   91.99
   1  -1  -2 3187.58  128.29
  -1  -1   2 3261.07  129.79
  -1  -1   2 3242.58  129.49
   1   1  -2 3008.50  127.79
   1   1  -2 3236.98  128.59
  -1   1   2 3460.05  131.89
   0  -1   2 1971.60   80.39
   0  -1  -2 1811.42   80.99
   0  -1  -2 2064.19   85.49
   0  -1   2 2141.59   81.79
   0   1   2 2099.99   81.09
   0   1  -2 2000.40   81.09
   0   1   2 2004.90   80.79
  -1  -1  -2  255.57   12.70
   1  -1   2  283.57   12.50
   1  -1   2  295.67   15.70
  -1  -1  -2  264.07   15.80
   1   1   2  299.97   12.90
   1   1   2  281.47   12.60
  -2  -1  -2 1409.46   61.39
   2  -1   2 1381.26   55.69
  -2   1  -2 1361.96   63.19
   2   1   2 1381.96   55.69
   2   1   2 1312.47   55.49
  -2   1  -2 1447.96   54.99
   2   1   2 1185.78   54.59
  -3  -1  -2 1176.88   54.89
   3  -1   2 1160.88   47.90
  -3  -1  -2 1127.09   46.60
  -3   1  -2 1151.58   46.80
  -3   1  -2 1117.59   54.89
   3   1   2 1135.99   47.60
   3   1   2 1073.49   46.40
  -4  -1  -2  863.61   36.60
   4  -1   2  900.91   38.60
  -4  -1  -2  817.32   45.80
   4   1   2  849.52   36.60
  -4   1  -2  813.72   46.40
  -4   1  -2  878.91   37.20
  -4   1  -2  904.11   37.10
   4   1   2  865.01   36.40
   4   1   2  946.31   38.20
  -5  -1  -2 2088.69   85.49
  -5  -1  -2 1957.70   83.39
  -5  -1  -2 1942.61   94.69
   5  -1   2 1967.80   84.59
  -5  -1  -2 1933.21   82.39
   5  -1   2 1975.70   84.39
   5  -1   2 2070.39   82.99
   5   1   2 2138.39   83.99
  -5   1  -2 2028.00   83.99
  -5   1  -2 1862.91   95.49
   5   1   2 1955.20   81.49
  -5   1  -2 2088.59   82.39
  -5   1  -2 2231.58   85.89
  -5   1  -2 1999.90   82.59
   5   1   2 2008.50   83.39
   5   1   2 1819.12   81.49
  -6  -1  -2  507.75   24.60
   6  -1   2  501.05   27.40
   6  -1   2  508.25   25.70
  -6  -1  -2  542.05   36.30
   6  -1   2  525.35   26.30
  -6  -1  -2  500.05   22.00
   6   1   2  507.85   25.40
   6   1   2  510.95   24.30
  -6   1  -2  496.55   26.00
  -6   1  -2  491.45   23.40
  -6   1  -2  516.85   23.50
   6   1   2  504.95   26.40
   6   1   2  508.55   22.40
  -6   1  -2  507.65   23.60
   6   1   2  493.15   22.30
  -6   1  -2  501.65   25.00
   6   1   2  477.15   25.10
  -7  -1  -2  268.77   15.00
   7  -1   2  293.47   14.40
   7  -1   2  269.27   16.30
   7  -1   2  259.47   18.80
  -7  -1  -2  272.47   16.40
  -7  -1  -2  255.07   25.40
   7   1   2  291.27   14.60
  -7   1  -2  267.47   15.50
  -7   1  -2  265.27   14.20
  -7   1  -2  245.48   16.00
  -7   1  -2  275.37   13.90
   7   1   2  266.07   16.70
   7   1   2  277.87   15.10
   7   1   2  247.38   16.40
   7   1   2  266.77   13.10
   8  -1   2  274.97   17.20
   8  -1   2  341.37   24.00
   8   1   2  259.07   18.40
  -8   1  -2  300.07   14.70
  -8   1  -2  296.87   17.30
  -8   1  -2  327.17   18.90
   8   1   2  306.67   14.80
  -9  -1  -2  211.68   11.60
   9  -1   2  240.18   11.70
  -9  -1  -2  227.08   13.10
   9  -1   2  218.78   13.10
   9   1   2  215.48   11.60
   9   1   2  209.18   13.00
  -9   1  -2  208.58   12.70
  -9   1  -2  208.08   12.10
  10  -1   2  204.68   10.80
 -10  -1  -2  213.78   10.80
  10  -1   2  202.38    9.80
 -10   1  -2  210.38   10.60
  10   1   2  173.48   12.10
  10   1   2  172.08   11.30
 -11  -2   2  320.77   15.50
  11  -2  -2  345.97   16.50
  11   2  -2  308.07   14.40
 -11   2   2  341.67   15.30
  11   2  -2  324.47   15.50
 -11   2   2  343.67   16.90
  10  -2  -2  498.85   24.70
  10  -2  -2  488.55   24.20
 -10  -2   2  518.65   24.10
  10   2  -2  500.95   22.40
 -10   2   2  515.35   21.20
 -10   2   2  526.55   23.80
  10   2  -2  497.55   23.60
 -10   2   2  493.45   24.20
  10   2  -2  522.95   22.30
  10   2  -2  500.45   22.20
   9  -2  -2  531.55   26.10
  -9  -2   2  535.05   25.40
  -9  -2   2  487.95   34.00
   9  -2  -2  543.25   26.80
  -9   2   2  447.36   23.30
   9   2  -2  536.15   24.90
  -9   2   2  538.45   23.20
  -9   2   2  507.85   23.20
   9   2  -2  539.35   23.40
  -9   2   2  543.45   25.20
   9   2  -2  524.85   23.40
  -8  -2   2  454.45   31.20
   8  -2  -2  443.96   22.40
   8  -2  -2  419.96   20.00
  -8  -2   2  432.66   21.70
  -8  -2   2  399.96   27.40
   8  -2  -2  400.66   20.30
  -8   2   2  435.96   20.20
   8   2  -2  414.06   21.00
   8   2  -2  442.86   19.60
  -8   2   2  426.16   21.40
  -8   2   2  418.46   31.10
   8   2  -2  419.06   19.40
  -8   2   2  407.46   21.90
  -8   2   2  426.76   19.80
  -8   2   2  415.56   21.80
   7  -2  -2   55.99    5.00
   7  -2  -2   53.79    5.60
  -7  -2   2   53.29    5.20
  -7  -2   2   67.19    9.90
  -7  -2   2   56.99   10.40
   7  -2  -2   57.29    4.70
  -7   2   2   43.40    5.90
   7   2  -2   50.49    5.60
  -7   2   2   51.69    4.50
  -7   2   2   53.79    4.70
   7   2  -2   54.49    4.20
   7   2  -2   52.89    4.10
   7   2  -2   47.80    4.90
  -7   2   2   58.09    4.70
  -7   2   2   54.89    6.80
   7   2  -2   55.39    4.30
  -7   2   2   54.39    5.30
   6  -2  -2  303.17   15.30
  -6  -2   2  325.67   20.20
  -6  -2   2  327.97   21.80
  -6  -2   2  364.86   19.90
   6  -2  -2  354.76   19.60
  -6   2   2  327.27   15.30
   6   2  -2  338.87   14.70
  -6   2   2  272.37   17.50
   6   2  -2  295.77   15.40
   6   2  -2  272.47   17.10
   6   2  -2  317.77   15.00
  -6   2   2  322.57   17.70
  -6   2   2  285.07   16.40
  -5  -2   2  972.90   44.90
   5  -2  -2  943.91   40.60
  -5  -2   2  974.60   46.00
   5   2  -2  902.51   39.30
  -5   2   2 1008.10   42.70
  -5   2   2  919.81   40.10
   5   2  -2  911.31   39.70
  -5   2   2  986.90   40.10
  -4  -2   2 3719.73  152.38
  -4  -2   2 3742.63  152.28
   4  -2  -2 3885.41  149.19
  -4   2   2 3743.83  150.18
  -4   2   2 3502.15  148.19
   4   2  -2 3638.84  147.29
   4   2  -2 3764.82  147.59
  -4   2   2 3569.54  155.38
  -4   2   2 3724.23  147.99
  -3  -2   2 1347.37   53.69
  -3  -2   2 1279.77   55.19
   3  -2  -2 1293.07   53.29
  -3  -2   2 1337.77   54.49
  -3   2   2 1206.68   51.79
   3   2  -2 1245.48   51.39
  -3   2   2 1231.28   57.09
  -3   2   2 1273.47   53.69
  -2  -2   2 2269.37   85.29
  -2  -2   2 2053.89   87.09
   2  -2  -2 2170.18   85.79
  -2  -2   2 2309.97   86.49
  -2   2   2 2028.50   85.49
  -2   2   2 1891.81   88.29
  -2   2   2 1972.80   84.69
   2   2  -2 2180.48   83.69
   2   2  -2 2028.70   83.69
  -1  -2   2  615.44   26.50
  -1  -2   2  589.84   26.20
   1  -2  -2  559.34   27.40
   1  -2  -2  589.54   24.80
  -1   2   2  534.85   23.80
  -1   2   2  597.34   25.00
   0  -2  -2 2255.37   90.79
   0  -2  -2 2169.08   90.59
   0  -2   2 2238.78   88.89
   0  -2  -2 2066.09   88.19
   0  -2   2 2232.18   89.19
   0   2   2 1967.50   86.09
   0   2   2 2127.59   87.79
   0   2   2 2237.68   87.29
   1  -2   2 2740.03  110.19
  -1  -2  -2 2652.53  112.29
   1  -2   2 2716.13  110.19
   1   2   2 2464.85  107.59
   1   2   2 2961.00  108.59
   1   2   2 2552.04  106.89
   2  -2   2 2946.31  111.09
  -2  -2  -2 2741.03  111.69
   2  -2   2 2480.35  107.49
   2   2   2 2618.24  105.09
   2   2   2 2653.83  105.59
  -2   2  -2 2392.26  104.19
   2   2   2 2412.66  104.09
   3  -2   2 3514.75  142.89
   3  -2   2 3728.43  149.29
  -3  -2  -2 3688.53  148.49
   3   2   2 3476.65  138.69
  -3   2  -2 3388.76  139.39
  -3   2  -2 3260.57  140.29
   3   2   2 3233.18  139.99
  -4  -2  -2   31.20    6.60
   4  -2   2   37.00    5.10
  -4   2  -2   31.40    3.20
  -4   2  -2   39.00    3.70
   4   2   2   26.60    3.50
   4   2   2   31.70    2.90
   4   2   2   31.30    3.00
   5  -2   2  156.38   10.60
   5  -2   2  173.98   13.00
   5  -2   2  161.08   11.00
  -5  -2  -2  171.18   17.20
  -5  -2  -2  172.18   10.80
  -5   2  -2  165.38    9.80
   5   2   2  164.48    9.00
   5   2   2  186.08    9.30
  -5   2  -2  165.58   10.80
   5   2   2  182.58   10.90
  -5   2  -2  172.78   10.00
   5   2   2  173.38   10.40
  -5   2  -2  170.58    9.70
   5   2   2  182.98    9.40
   6  -2   2  670.53   33.30
   6  -2   2  596.34   26.40
   6  -2   2  581.44   27.90
  -6  -2  -2  598.94   39.50
   6  -2   2  532.65   31.50
  -6  -2  -2  591.04   27.60
   6   2   2  574.34   30.20
   6   2   2  594.14   29.00
  -6   2  -2  604.24   27.50
   6   2   2  619.34   29.10
   6   2   2  585.34   26.40
  -6   2  -2  590.94   29.10
   6   2   2  567.04   30.00
  -6   2  -2  613.84   27.40
  -6   2  -2  621.24   29.30
  -7  -2  -2 1117.09   59.39
   7  -2   2 1185.68   51.39
  -7  -2  -2 1163.58   48.90
  -7  -2  -2 1126.19   64.19
   7  -2   2  947.21   54.19
  -7   2  -2 1136.79   49.00
   7   2   2 1108.89   51.49
  -7   2  -2 1186.28   50.89
  -7   2  -2 1153.68   49.10
   7   2   2 1215.28   47.80
  -7   2  -2 1019.10   50.89
   7   2   2 1190.68   47.90
  -7   2  -2 1196.48   49.00
   7   2   2 1187.98   50.19
   7   2   2 1076.49   51.79
   7   2   2 1152.48   47.80
  -8  -2  -2   89.89    7.50
   8  -2   2   81.39    7.30
   8   2   2   84.19    7.90
   8   2   2   89.99    5.30
  -8   2  -2   74.79    7.50
  -8   2  -2   82.89    5.80
   8   2   2   79.69    5.40
  -8   2  -2   84.29    8.40
  -8   2  -2   84.19    7.00
   8   2   2   82.49    7.50
  -8   2  -2   87.69    6.30
   9  -2   2  613.14   28.90
  -9  -2  -2  631.44   29.10
   9  -2   2  614.44   28.10
   9   2   2  649.54   28.20
   9   2   2  640.04   25.90
  -9   2  -2  559.84   31.20
  -9   2  -2  661.93   28.80
   9   2   2  632.04   29.70
  10  -2   2  146.09    8.80
  10  -2   2  137.39    7.60
 -10  -2  -2  141.89    8.20
  10   2   2  123.69    7.00
 -10   2  -2  129.19    7.20
 -11  -3   2   50.89    3.90
  11  -3  -2   37.40    4.10
  11   3  -2   46.20    3.00
  11   3  -2   46.00    3.50
 -11   3   2   51.49    4.00
  10  -3  -2 1365.06   59.39
 -10  -3   2 1400.66   58.19
 -10   3   2 1421.66   58.69
  10   3  -2 1367.66   57.39
  10   3  -2 1450.85   57.39
 -10   3   2 1473.05   59.49
 -10   3   2 1334.87   58.69
  10   3  -2 1403.36   58.59
 -10   3   2 1371.26   56.89
  10   3  -2 1392.06   57.39
  -9  -3   2   81.09    6.20
  -9  -3   2   79.09   17.00
  -9  -3   2  111.49   20.00
   9  -3  -2   79.59    5.70
   9  -3  -2   78.39    6.70
   9   3  -2   84.89    5.90
   9   3  -2   80.89    6.20
  -9   3   2   85.59    6.50
  -9   3   2   77.89    7.30
   9   3  -2   77.19    5.50
  -9   3   2   76.19    5.30
  -9   3   2   61.99    6.60
   9   3  -2   81.79    5.40
  -9   3   2   77.09    5.60
  -8  -3   2  381.06   18.70
  -8  -3   2  381.06   26.20
   8  -3  -2  370.76   19.50
   8  -3  -2  371.06   18.10
  -8  -3   2  334.97   25.70
   8   3  -2  372.86   17.40
   8   3  -2  368.66   18.70
  -8   3   2  369.36   17.90
  -8   3   2  320.97   19.80
  -8   3   2  360.36   18.80
  -8   3   2  377.36   17.70
  -8   3   2  369.76   17.90
   8   3  -2  354.16   17.10
  -7  -3   2  677.13   30.40
   7  -3  -2  684.93   29.30
  -7  -3   2  677.03   37.60
  -7  -3   2  628.84   37.50
   7  -3  -2  674.33   31.30
   7  -3  -2  624.74   30.40
  -7   3   2  669.63   29.80
   7   3  -2  620.84   31.10
   7   3  -2  694.53   29.10
  -7   3   2  667.63   29.60
  -7   3   2  618.34   30.60
   7   3  -2  688.23   29.00
  -7   3   2  657.43   33.90
  -7   3   2  671.73   29.70
   6  -3  -2  192.58   11.30
   6  -3  -2  196.98   11.00
   6  -3  -2  199.18   12.00
  -6  -3   2  185.68   11.20
  -6  -3   2  209.38   15.70
  -6  -3   2  207.98   16.40
   6   3  -2  194.98   11.00
  -6   3   2  212.98   11.00
   6   3  -2  207.38   10.40
  -6   3   2  211.08   14.10
  -6   3   2  205.78   11.10
  -6   3   2  214.08   12.00
  -6   3   2  208.58   11.10
   6   3  -2  178.08   12.90
   5  -3  -2    0.00    1.10
  -5  -3   2    0.30    2.10
  -5  -3   2    1.60    1.60
   5  -3  -2    4.60    1.90
   5  -3  -2    3.20    2.60
  -5   3   2    3.50    1.50
  -5   3   2    2.60    1.10
  -5   3   2    1.20    2.00
   5   3  -2    1.70    1.20
   5   3  -2    0.00    0.80
  -4  -3   2  656.93   33.30
  -4  -3   2  709.93   31.10
   4  -3  -2  684.03   30.90
  -4   3   2  643.64   28.30
  -4   3   2  663.83   31.10
   4   3  -2  632.24   27.80
  -4   3   2  635.34   28.50
  -3  -3   2 3614.94  134.89
   3  -3  -2 3448.16  137.09
  -3  -3   2 3358.16  139.09
  -3  -3   2 3403.86  137.29
   3  -3  -2 3062.79  141.19
   3   3  -2 3244.48  133.79
  -3   3   2 3546.15  136.99
   3   3  -2 3217.98  133.49
  -3   3   2 3247.38  134.09
   2  -3  -2  423.76   17.40
  -2  -3   2  375.76   20.00
   2  -3  -2  333.47   20.40
  -2  -3   2  398.76   19.70
   2  -3  -2  405.66   19.20
  -2   3   2  382.26   18.30
   2   3  -2  366.16   16.20
   2   3  -2  357.96   17.70
  -2   3   2  361.66   16.20
   2   3  -2  369.96   16.40
  -1  -3   2  169.38   10.70
   1  -3  -2  164.08   11.00
   1  -3  -2  167.68   10.20
  -1  -3   2  159.98   10.50
   1  -3  -2  162.38    9.20
   1  -3  -2  149.49   10.60
  -1   3   2  153.08    7.40
  -1   3   2  165.78    9.00
   0  -3   2  278.87   15.50
   0  -3  -2  266.87   14.40
   0  -3  -2  270.77   15.40
   0  -3  -2  281.57   15.90
   0  -3   2  270.37   14.70
   0   3   2  247.18   13.40
   0   3   2  254.67   11.50
   0   3   2  269.67   12.90
  -1  -3  -2  229.48   14.50
  -1  -3  -2  207.88   14.10
   1  -3   2  210.58   13.40
  -1  -3  -2  213.18   13.20
   1  -3   2  231.98   12.90
   1   3   2  210.38    9.80
   1   3   2  229.08   11.70
   1   3   2  217.18   10.90
  -2  -3  -2 2261.37   95.09
  -2  -3  -2 2282.67   97.09
   2  -3   2 2538.45   94.69
   2  -3   2 2267.17   94.89
  -2  -3  -2 2402.26   97.89
   2   3   2 2169.88   89.49
  -2   3  -2 2197.78   89.39
   2   3   2 2166.98   90.39
   2   3   2 1954.70   89.49
   2   3   2 2029.70   91.19
  -3  -3  -2 1496.65   66.59
   3  -3   2 1448.26   65.49
  -3  -3  -2 1589.94   69.59
   3  -3   2 1606.04   68.29
   3   3   2 1336.17   59.79
  -3   3  -2 1437.76   59.99
   3   3   2 1446.86   59.79
   3   3   2 1462.75   61.79
  -3   3  -2 1367.06   60.29
   4  -3   2  381.46   22.50
  -4  -3  -2  387.76   29.00
  -4  -3  -2  378.76   23.80
   4  -3   2  334.07   19.00
   4   3   2  375.36   17.20
   4   3   2  378.96   18.90
   4   3   2  344.27   18.20
  -4   3  -2  386.06   18.20
   4   3   2  370.56   17.10
  -4   3  -2  373.76   17.50
   4   3   2  364.26   17.00
   5  -3   2  381.26   27.00
   5  -3   2  361.56   19.70
   5  -3   2  387.76   20.50
  -5  -3  -2  386.66   28.00
   5  -3   2  394.76   20.20
  -5  -3  -2  381.16   26.00
  -5   3  -2  392.06   19.30
  -5   3  -2  388.46   20.40
  -5   3  -2  429.56   19.60
   5   3   2  419.06   18.80
   5   3   2  380.96   19.80
   5   3   2  401.46   18.40
   5   3   2  415.46   20.70
  -5   3  -2  420.46   19.30
  -6  -3  -2 1001.10   56.69
   6  -3   2 1050.99   51.49
  -6  -3  -2 1031.10   54.89
   6  -3   2 1012.10   45.90
   6  -3   2 1085.29   46.60
   6   3   2 1062.19   46.90
  -6   3  -2 1059.89   45.00
  -6   3  -2 1051.69   45.00
   6   3   2 1034.20   45.80
   6   3   2 1033.90   43.80
  -6   3  -2 1004.90   46.20
   6   3   2  977.40   43.90
  -7  -3  -2   47.90    5.40
   7  -3   2   50.49    5.70
  -7  -3  -2   38.90   10.50
  -7  -3  -2   57.19   13.30
   7   3   2   53.19    4.60
   7   3   2   49.90    8.40
  -7   3  -2   60.69    5.40
  -7   3  -2   60.09    5.40
   7   3   2   55.99    4.50
   7   3   2   51.99    4.20
   7   3   2   53.69    5.20
  -7   3  -2   51.49    4.80
  -7   3  -2   53.99    5.60
  -8  -3  -2   20.70    3.40
   8  -3   2   18.80    3.00
   8  -3   2   20.50    3.10
  -8   3  -2   19.50    3.10
  -8   3  -2   18.70    3.20
   8   3   2   17.00    2.70
  -8   3  -2   18.50    2.50
   8   3   2   22.10    3.70
  -8   3  -2   17.20    3.20
   8   3   2   17.10    2.50
   9  -3   2  208.08   11.10
  -9  -3  -2  205.38   11.40
   9  -3   2  214.68   11.30
  -9   3  -2  216.58   10.20
  -9   3  -2  222.58   11.60
   9   3   2  213.38    9.70
  -9   3  -2  213.48   10.30
   9   3   2  216.38   11.30
  10  -4  -2  393.36   18.10
  10   4  -2  371.46   17.60
  10   4  -2  380.06   18.20
  10   4  -2  381.86   17.00
 -10   4   2  356.46   17.40
 -10   4   2  398.56   16.60
 -10   4   2  412.56   18.00
  10   4  -2  395.86   17.80
   9  -4  -2   59.59    5.20
  -9  -4   2   53.89   13.80
  -9  -4   2   59.89    4.10
   9  -4  -2   52.89    4.60
  -9   4   2   55.59    4.90
  -9   4   2   62.09    4.60
   9   4  -2   57.19    4.40
  -9   4   2   58.99    5.00
   9   4  -2   59.59    4.60
  -9   4   2   63.49    4.40
   9   4  -2   61.39    4.90
   9   4  -2   57.19    4.20
  -8  -4   2  132.69   23.20
   8  -4  -2  142.19    8.90
  -8  -4   2  139.59    8.30
   8  -4  -2  158.98   10.10
  -8   4   2  130.09    8.70
   8   4  -2  144.99    8.30
   8   4  -2  150.98    8.40
  -8   4   2  154.08    8.90
  -8   4   2  153.58    9.00
  -8   4   2  145.49    9.30
   8   4  -2  135.09    8.90
  -7  -4   2 1823.42  105.39
   7  -4  -2 1651.33   70.29
  -7  -4   2 1688.43   69.29
  -7  -4   2 1602.74   79.79
   7  -4  -2 1688.73   71.19
   7   4  -2 1694.93   68.99
   7   4  -2 1670.83   69.09
   7   4  -2 1599.14   70.29
  -7   4   2 1549.34   70.39
  -7   4   2 1684.23   69.79
  -7   4   2 1638.44   69.69
  -7   4   2 1719.33   70.09
   7   4  -2 1738.83   69.19
  -6  -4   2  440.36   20.30
  -6  -4   2  481.95   44.60
   6  -4  -2  442.46   21.90
  -6  -4   2  430.36   28.30
  -6   4   2  437.06   21.00
  -6   4   2  466.75   21.00
   6   4  -2  422.76   20.20
   6   4  -2  440.86   20.10
  -6   4   2  432.56   25.30
  -5  -4   2  833.32   58.89
   5  -4  -2  810.92   34.10
   5  -4  -2  784.22   36.70
  -5  -4   2  744.53   32.90
  -5  -4   2  787.12   41.10
   5  -4  -2  742.33   33.50
  -5  -4   2  699.63   31.80
   5  -4  -2  820.62   35.00
  -5   4   2  738.43   32.90
  -5   4   2  704.43   33.50
  -5   4   2  683.33   32.80
  -5   4   2  809.02   37.60
  -5   4   2  752.32   32.80
   5   4  -2  641.44   31.90
  -4  -4   2  392.36   38.20
   4  -4  -2  389.46   19.30
  -4  -4   2  367.66   23.30
   4  -4  -2  388.16   20.90
  -4   4   2  371.26   20.60
   4   4  -2  357.56   16.40
  -4   4   2  389.86   17.40
  -4   4   2  364.46   17.50
   4   4  -2  357.86   17.00
  -3  -4   2  234.18   15.70
   3  -4  -2  220.48   13.90
   3  -4  -2  192.18   15.90
  -3  -4   2  217.88   14.20
   3   4  -2  204.58    9.40
  -3   4   2  227.58   11.00
  -3   4   2  228.18   10.60
  -3   4   2  222.98   13.30
   3   4  -2  189.38   10.40
  -2  -4   2  160.78   11.60
   2  -4  -2  166.98    9.40
  -2  -4   2  143.89   11.60
   2  -4  -2  160.78   11.60
   2  -4  -2  152.08   11.80
   2  -4  -2  169.58   11.30
  -2   4   2  142.39    8.00
  -2   4   2  147.69   10.70
   2   4  -2  142.99    8.20
   2   4  -2  148.39    7.70
  -2   4   2  147.59    7.60
   1  -4  -2  231.18   14.70
   1  -4  -2  258.07   14.00
  -1  -4   2  244.98   15.70
  -1  -4   2  237.38   15.30
   1  -4  -2  258.27   15.10
  -1   4   2  262.97   13.40
   1   4  -2  233.98   12.70
  -1   4   2  239.98   11.10
   0  -4   2 2846.52  115.09
   0  -4  -2 2708.33  114.99
   0  -4  -2 2934.71  114.99
   0  -4  -2 2709.63  114.49
   0  -4   2 2877.01  116.89
   0   4  -2 2451.55  112.79
   0   4   2 2871.31  112.29
   0   4   2 2700.83  109.89
   0   4   2 2646.04  113.09
   1  -4   2  284.77   16.60
  -1  -4  -2  304.87   17.30
  -1  -4  -2  303.57   17.80
  -1  -4  -2  313.67   18.00
   1  -4   2  258.37   20.40
   1   4   2  277.77   12.70
   1   4   2  253.17   13.30
   1   4   2  290.27   14.30
   1   4   2  294.17   15.40
  -1   4  -2  263.37   12.10
   2  -4   2   38.90    5.20
  -2  -4  -2   41.20    3.70
   2  -4   2   38.10    4.20
  -2  -4  -2   50.89    7.60
  -2  -4  -2   38.40    6.40
  -2  -4  -2   55.19    7.00
   2  -4   2   46.40    5.30
   2  -4   2   56.19    7.20
   2   4   2   53.29    3.50
   2   4   2   43.20    4.80
   2   4   2   38.60    3.50
  -2   4  -2   41.50    3.30
   2   4   2   47.90    4.30
   3  -4   2  913.71   41.10
   3  -4   2  964.30   44.20
   3  -4   2 1070.99   61.39
   3  -4   2  945.51   43.40
  -3  -4  -2  950.30   41.20
   3  -4   2  992.00   48.30
   3  -4   2  985.30   42.90
  -3  -4  -2 1017.50   49.00
  -3  -4  -2  966.10   48.40
   3   4   2  939.21   40.80
   3   4   2  970.90   41.10
  -3   4  -2  978.90   41.50
   3   4   2  974.00   43.30
  -3   4  -2  959.30   41.00
   4  -4   2 1086.39   49.70
   4  -4   2 1172.08   48.30
   4  -4   2 1162.68   55.79
  -4  -4  -2 1126.19   56.69
  -4  -4  -2 1120.29   56.69
   4  -4   2 1147.99   50.59
   4  -4   2 1207.58   49.80
   4   4   2 1107.29   47.60
  -4   4  -2 1118.79   48.20
  -4   4  -2 1173.78   48.00
  -4   4  -2 1088.99   48.40
   4   4   2 1104.09   49.90
   4   4   2 1113.09   47.50
  -4   4  -2 1036.20   49.20
   4   4   2 1226.58   47.70
   4   4   2 1081.69   48.90
   5  -4   2  224.88   18.80
   5  -4   2  254.87   14.50
   5  -4   2  253.57   15.20
   5  -4   2  275.47   14.10
   5  -4   2  283.97   15.00
  -5  -4  -2  249.68   21.00
  -5  -4  -2  254.37   20.80
   5   4   2  256.97   15.50
  -5   4  -2  267.17   14.10
   5   4   2  269.17   14.60
  -5   4  -2  253.67   13.60
   5   4   2  259.57   13.30
   5   4   2  262.87   13.10
  -5   4  -2  249.88   14.70
  -5   4  -2  251.47   13.80
   6  -4   2  196.98   12.50
   6  -4   2  235.28   13.50
   6  -4   2  244.48   13.00
   6  -4   2  242.48   13.80
   6  -4   2  194.78   19.60
  -6  -4  -2  212.48   19.40
  -6  -4  -2  223.28   21.30
  -6   4  -2  234.68   12.70
   6   4   2  227.48   11.70
   6   4   2  242.38   13.50
   6   4   2  198.58   14.40
   6   4   2  251.87   12.50
  -6   4  -2  227.88   13.50
  -6   4  -2  237.58   13.00
   7  -4   2   42.20    4.50
   7  -4   2   42.70    4.20
  -7  -4  -2   37.10    4.20
  -7   4  -2   37.00    4.60
   7   4   2   43.20    4.50
   7   4   2   45.50    3.70
   7   4   2   43.50    4.10
  -7   4  -2   41.80    4.50
  -7   4  -2   45.50    4.50
  -7   4  -2   39.50    4.10
   7   4   2   40.70    3.90
   8  -4   2    1.90    1.20
   8  -4   2    0.50    0.80
  -8  -4  -2    1.60    1.20
   8   4   2    2.80    1.00
   8   4   2    2.50    1.20
  -8   4  -2    2.70    1.10
   8   4   2    1.10    1.60
  -8   4  -2    1.30    1.80
   9  -4   2   50.79    3.80
  -9  -4  -2   54.19    4.00
  -9  -4  -2   48.40    8.90
   9  -4   2   52.79    3.00
  -9   4  -2   51.29    3.50
   9   4   2   53.79    3.00
  -9   4  -2   50.29    3.80
  -9   4  -2   48.50    3.70
   9   4   2   55.99    4.40
  10   5  -2   30.20    2.40
 -10   5   2   28.90    1.90
 -10   5   2   29.70    2.50
  10   5  -2   31.90    2.40
   9  -5  -2    9.40    1.80
  -9  -5   2    8.00    5.70
   9  -5  -2    8.70    2.00
  -9   5   2    9.40    1.70
   9   5  -2   12.40    2.00
  -9   5   2   14.90    2.10
  -9   5   2    8.90    2.40
   9   5  -2    9.80    1.80
   9   5  -2   12.70    2.20
   8  -5  -2  102.99    6.90
  -8  -5   2   93.19   17.50
   8  -5  -2  120.29    7.40
  -8   5   2  118.19    6.90
  -8   5   2  119.59    7.30
  -8   5   2  113.89    7.00
  -8   5   2  107.09    7.20
   8   5  -2  115.39    6.80
   8   5  -2  116.39    6.70
   7  -5  -2   29.30    3.70
  -7  -5   2   28.80    9.50
   7  -5  -2   32.20    3.80
  -7   5   2   30.00    3.40
   7   5  -2   28.10    3.00
   7   5  -2   37.40    3.60
   7   5  -2   29.40    3.10
   7   5  -2   31.70    3.60
  -7   5   2   25.50    3.60
  -7   5   2   30.40    3.60
  -7   5   2   29.30    3.60
  -6  -5   2  590.14   38.40
   6  -5  -2  643.84   29.20
   6  -5  -2  606.94   29.10
  -6  -5   2  734.83   55.59
  -6   5   2  628.84   28.50
  -6   5   2  641.54   28.60
   6   5  -2  650.43   27.80
  -6   5   2  628.64   29.00
   6   5  -2  602.04   27.80
  -6   5   2  613.64   28.60
  -5  -5   2  295.17   32.40
  -5  -5   2  263.77   20.90
   5  -5  -2  258.47   14.00
   5  -5  -2  250.47   13.60
  -5   5   2  259.97   13.10
  -5   5   2  241.78   13.20
   5   5  -2  226.18   12.40
  -5   5   2  237.38   13.50
  -5   5   2  252.97   13.40
   5   5  -2  268.97   12.40
   4  -5  -2  561.34   25.30
   4  -5  -2  553.44   30.00
  -4  -5   2  550.84   24.30
  -4  -5   2  561.34   25.60
   4  -5  -2  576.74   26.90
  -4  -5   2  501.25   34.30
   4  -5  -2  529.65   25.50
  -4  -5   2  613.44   48.00
   4  -5  -2  560.34   25.90
  -4   5   2  503.45   25.00
  -4   5   2  532.75   24.90
  -4   5   2  590.04   32.30
  -4   5   2  534.45   24.80
  -4   5   2  543.85   24.50
   3  -5  -2  604.34   32.60
   3  -5  -2  604.64   28.40
  -3  -5   2  611.34   34.60
  -3  -5   2  597.04   28.80
   3  -5  -2  638.84   29.40
  -3  -5   2  614.94   27.50
   3  -5  -2  667.23   30.90
   3  -5  -2  639.64   28.00
   3  -5  -2  651.23   28.90
  -3  -5   2  714.33   51.39
  -3   5   2  606.94   27.50
  -3   5   2  638.84   27.20
  -3   5   2  597.44   31.10
   3   5  -2  593.34   26.00
  -2  -5   2  127.29    8.00
  -2  -5   2  128.69   11.90
  -2  -5   2  123.19    9.90
   2  -5  -2  139.29    8.70
   2  -5  -2  121.79    9.00
  -2  -5   2  130.39   11.70
   2  -5  -2  134.19    8.40
   2  -5  -2  134.99    8.70
   2  -5  -2  135.49    8.00
  -2  -5   2  129.49    9.20
  -2  -5   2  157.08   21.10
   2  -5  -2  128.49    8.80
  -2   5   2  136.79    7.20
   2   5  -2  129.69    8.40
  -2   5   2  127.79    7.50
  -2   5   2  143.99   10.20
   1  -5  -2   64.69    6.80
  -1  -5   2   58.39    7.40
  -1  -5   2   60.09    6.10
  -1  -5   2   61.29    8.00
  -1  -5   2   60.79    5.10
   1  -5  -2   59.89    5.00
   1  -5  -2   69.39    5.70
  -1   5   2   67.59    6.20
  -1   5   2   59.09    6.50
  -1   5   2   71.69    4.10
  -1   5   2   56.89    4.40
   1   5  -2   66.09    5.80
   1   5  -2   59.49    5.90
   0  -5   2  220.18   12.20
   0  -5  -2  207.38   11.70
   0  -5   2  223.48   15.20
   0  -5   2  226.18   13.90
   0  -5   2  226.58   13.40
   0  -5  -2  226.88   15.20
   0  -5   2  227.58   17.00
   0  -5   2  232.08   25.30
   0   5   2  209.08   10.80
   0   5  -2  232.98   14.30
   0   5   2  222.68   13.90
   0   5   2  227.68   10.60
   0   5   2  236.08   13.80
  -1  -5  -2  323.87   16.00
  -1  -5  -2  298.07   14.90
   1  -5   2  336.57   18.00
   1  -5   2  379.66   32.90
   1  -5   2  351.16   18.70
  -1  -5  -2  306.57   20.30
   1  -5   2  332.57   16.90
  -1   5  -2  321.77   14.50
  -1   5  -2  316.57   19.10
   1   5   2  317.97   14.90
   1   5   2  337.77   18.30
   1   5   2  345.37   18.20
   1   5   2  318.17   17.10
   2  -5   2  736.33   49.40
   2  -5   2  658.33   33.20
   2  -5   2  716.23   33.10
  -2  -5  -2  738.73   32.00
  -2  -5  -2  672.43   30.60
   2  -5   2  654.43   37.70
  -2  -5  -2  774.22   40.90
   2  -5   2  711.73   32.00
   2   5   2  678.43   30.10
   2   5   2  680.23   29.90
   2   5   2  680.33   33.10
  -2   5  -2  659.03   35.30
  -2   5  -2  689.13   29.70
   3  -5   2  379.46   20.30
  -3  -5  -2  319.37   23.20
   3  -5   2  349.87   17.70
   3  -5   2  335.47   23.20
  -3  -5  -2  299.37   18.40
   3  -5   2  351.36   30.50
  -3  -5  -2  315.27   26.50
  -3  -5  -2  327.17   16.00
   3  -5   2  345.27   18.90
  -3   5  -2  330.97   15.80
   3   5   2  343.87   16.00
   3   5   2  325.27   15.70
  -3   5  -2  326.27   16.30
   3   5   2  295.37   16.80
  -3   5  -2  302.17   20.80
   3   5   2  306.77   22.20
   3   5   2  337.67   15.90
   4  -5   2   50.49    5.60
   4  -5   2   47.40    4.90
   4  -5   2   43.10    5.00
  -4  -5  -2   33.20    8.90
  -4  -5  -2   43.90   12.40
  -4  -5  -2   32.90    9.40
   4  -5   2   39.20    9.00
   4   5   2   45.20    4.10
  -4   5  -2   44.50    5.10
   4   5   2   35.20    6.00
   4   5   2   38.90    3.80
  -4   5  -2   39.70    4.10
  -4   5  -2   43.30    4.90
   4   5   2   48.90    4.90
   4   5   2   38.50    3.90
   5  -5   2  365.66   18.20
   5  -5   2  362.06   18.40
  -5  -5  -2  342.37   17.10
  -5  -5  -2  299.67   19.60
   5  -5   2  337.97   18.80
  -5  -5  -2  345.97   34.80
   5  -5   2  288.57   23.90
  -5  -5  -2  325.87   26.10
  -5   5  -2  360.76   17.60
  -5   5  -2  371.86   17.60
   5   5   2  351.56   16.60
   5   5   2  354.46   18.00
  -5   5  -2  335.27   17.90
   5   5   2  364.26   17.00
   5   5   2  324.77   20.10
  -5   5  -2  365.56   17.40
  -6  -5  -2  155.38   22.10
   6  -5   2  154.78    9.60
   6  -5   2  174.18    8.10
   6  -5   2  168.18   10.70
  -6  -5  -2  167.58    9.50
   6  -5   2  171.38   10.60
  -6   5  -2  182.98   10.20
  -6   5  -2  167.68    9.80
   6   5   2  168.48    9.20
   6   5   2  178.58    9.60
   6   5   2  178.18   10.50
  -6   5  -2  163.88   10.50
   6   5   2  165.18    9.60
  -6   5  -2  161.38   10.00
   7  -5   2  159.98    9.70
  -7  -5  -2  162.08    8.70
  -7  -5  -2  169.38   20.50
   7   5   2  163.18    8.50
   7   5   2  154.38    8.60
  -7   5  -2  167.08    9.10
  -7   5  -2  150.98    9.40
  -7   5  -2  158.78    9.30
  -7   5  -2  160.58    9.30
   7   5   2  163.18    8.80
  -8  -5  -2   52.69    9.20
   8  -5   2   67.39    4.60
  -8   5  -2   64.09    4.40
  -8   5  -2   66.99    4.50
  -8   5  -2   67.09    4.20
   8   5   2   61.69    4.40
   8   5   2   65.19    4.10
  -9   6   2   77.99    5.20
   9   6  -2   88.19    4.40
   9   6  -2   77.69    4.50
  -9   6   2   88.39    4.60
   8  -6  -2   96.49    6.70
   8   6  -2  111.99    7.00
  -8   6   2  106.99    6.00
   8   6  -2  106.09    6.00
  -8   6   2  112.29    6.30
  -8   6   2  126.79    7.60
  -8   6   2  102.29    7.30
  -7  -6   2  272.07   29.50
   7  -6  -2  315.27   15.80
   7   6  -2  334.07   15.10
   7   6  -2  337.67   15.30
  -7   6   2  343.57   15.80
  -7   6   2  336.87   15.40
  -7   6   2  342.77   15.70
  -7   6   2  339.67   17.00
  -6  -6   2  243.58   28.90
   6  -6  -2  255.17   13.30
  -6   6   2  258.57   13.10
   6   6  -2  234.08   12.10
   6   6  -2  233.28   13.80
   6   6  -2  243.58   12.20
  -6   6   2  249.38   12.60
  -6   6   2  251.77   12.80
  -6   6   2  261.47   13.20
   5  -6  -2   25.60    4.00
   5   6  -2   30.50    2.90
  -5   6   2   28.50    3.40
   5   6  -2   25.70    3.30
  -5   6   2   26.30    3.80
  -5   6   2   27.80    3.30
  -5   6   2   22.10    3.30
  -4  -6   2   64.69    4.60
   4  -6  -2   66.39    5.60
  -4  -6   2   65.39   14.40
  -4  -6   2   49.50   11.30
  -4   6   2   58.59    4.90
  -4   6   2   57.89    4.70
  -4   6   2   57.89    4.80
   4   6  -2   65.29    4.40
  -3  -6   2   52.09   13.00
  -3  -6   2   56.19    5.20
  -3  -6   2   48.60    4.20
   3  -6  -2   48.80    4.90
  -3  -6   2   59.29    9.70
   3   6  -2   47.10    3.50
  -3   6   2   47.50    3.90
  -3   6   2   39.50    4.10
  -2  -6   2   13.20    5.00
   2  -6  -2   12.10    2.40
  -2  -6   2   14.80    3.00
  -2  -6   2   12.90    2.30
  -2  -6   2   18.20    9.10
  -2  -6   2   20.20    4.10
  -2   6   2   15.10    4.80
  -2   6   2   13.70    2.40
  -2   6   2   11.50    2.10
  -1  -6   2  898.71   43.40
  -1  -6   2 1034.40   63.99
  -1  -6   2  972.90   42.00
   1  -6  -2  958.90   42.20
  -1  -6   2 1008.60   48.50
  -1  -6   2 1002.10   43.90
  -1  -6   2  940.11   49.50
  -1   6   2  945.91   47.20
  -1   6   2  964.20   40.50
  -1   6   2 1008.20   46.20
  -1   6   2  935.11   40.60
   0  -6   2  525.55   40.90
   0  -6  -2  499.75   28.00
   0  -6   2  488.55   28.00
   0  -6   2  476.95   24.70
   0  -6   2  486.65   24.60
   0  -6   2  497.85   23.30
   0  -6   2  463.65   29.90
   0  -6  -2  488.75   23.00
   0   6   2  495.85   26.20
   0   6   2  487.75   21.50
   0   6   2  450.25   21.60
   1  -6   2  234.48   14.20
   1  -6   2  196.68   18.20
   1  -6   2  240.18   25.10
   1  -6   2  241.68   14.10
  -1  -6  -2  209.38   11.80
  -1  -6  -2  247.38   18.00
   1  -6   2  223.48   12.70
  -1   6  -2  195.28   10.50
   1   6   2  229.58   15.00
   1   6   2  207.58   11.40
   1   6   2  228.18   11.20
  -2  -6  -2  140.79    8.40
   2  -6   2  136.29   10.20
   2  -6   2  147.49    9.40
   2  -6   2  137.29   10.10
  -2  -6  -2  132.99   14.90
   2  -6   2  132.69   14.70
   2   6   2  128.89   11.00
   2   6   2  150.28    8.40
   2   6   2  141.09    8.00
  -2   6  -2  139.79    7.90
   3  -6   2  302.97   16.20
  -3  -6  -2  275.27   22.60
   3  -6   2  297.37   23.30
   3  -6   2  290.97   17.10
   3  -6   2  321.37   17.20
  -3  -6  -2  315.57   14.90
   3   6   2  302.07   14.90
   3   6   2  299.27   14.80
  -3   6  -2  304.47   15.00
  -3   6  -2  290.67   15.00
   3   6   2  300.27   18.50
   3   6   2  290.87   15.50
   4  -6   2 1488.95   64.29
   4  -6   2 1497.45   64.29
   4  -6   2 1610.44   65.79
  -4   6  -2 1475.55   62.99
   4   6   2 1575.34   62.89
   4   6   2 1461.95   63.39
  -4   6  -2 1461.65   62.99
   4   6   2 1484.25   62.39
  -4   6  -2 1473.05   62.69
   4   6   2 1537.45   62.89
   5  -6   2    9.70    2.60
   5  -6   2    9.50    2.20
   5  -6   2   11.50    2.50
   5   6   2    8.50    1.90
  -5   6  -2   11.40    2.50
  -5   6  -2    9.80    2.10
   5   6   2   10.70    2.10
  -5   6  -2   12.70    2.50
   5   6   2    6.70    1.70
   5   6   2    7.00    2.00
   6  -6   2   60.29    5.00
   6  -6   2   60.29    5.10
  -6   6  -2   59.39    4.80
  -6   6  -2   55.79    6.60
  -6   6  -2   61.89    4.60
   6   6   2   64.89    4.70
   6   6   2   53.29    5.20
   6   6   2   63.29    5.00
   7  -6   2  119.49    6.80
  -7   6  -2  115.79    6.70
   7   6   2  115.49    6.20
   7   6   2  107.89    6.40
   7   6   2  119.79    6.40
  -7   6  -2  130.59    6.90
   7  -7  -2  386.36   17.40
  -7   7   2  419.86   17.60
   7   7  -2  397.36   18.20
   7   7  -2  389.96   17.10
  -7   7   2  396.86   17.20
   6  -7  -2    7.30    1.50
   6   7  -2   10.80    1.80
  -6   7   2   10.80    2.00
   6   7  -2   11.70    2.00
  -6   7   2   10.00    1.80
  -6   7   2    9.80    1.60
   5  -7  -2   37.70    3.80
   5   7  -2   40.00    3.40
   5   7  -2   43.00    4.10
  -5   7   2   45.00    4.50
  -5   7   2   44.30    3.80
  -5   7   2   45.90    3.70
   4  -7  -2  522.35   24.60
  -4  -7   2  514.15   39.90
  -4   7   2  534.05   23.50
  -4   7   2  558.44   23.60
  -4   7   2  551.04   23.60
   4   7  -2  514.15   22.60
   3  -7  -2  504.95   23.60
  -3  -7   2  510.85   22.20
  -3  -7   2  484.95   38.30
  -3   7   2  485.35   22.30
  -3   7   2  515.65   22.60
  -2  -7   2   21.00    3.90
   2  -7  -2   16.40    2.60
  -2  -7   2   12.80    2.20
  -2   7   2   14.40    2.50
  -2   7   2   14.30    2.40
  -1  -7   2  111.89    7.10
  -1  -7   2  107.79    7.90
   1  -7  -2   94.49    7.80
  -1  -7   2  112.49    8.90
  -1   7   2  103.19    6.40
  -1   7   2  115.59    7.00
   0  -7   2  560.14   24.60
   0  -7   2  488.35   25.20
   0  -7  -2  523.35   24.40
   0  -7   2  542.45   26.10
   0   7   2  511.15   23.20
   0   7   2  538.35   23.70
   1  -7   2   61.69    5.90
  -1  -7  -2   60.29    5.00
   1  -7   2   65.19    5.40
   1  -7   2   70.19    6.30
   1   7   2   67.09    5.50
   1   7   2   69.59    5.00
   2  -7   2   41.30    4.20
  -2  -7  -2   37.30    3.60
   2  -7   2   43.30    4.60
   2  -7   2   46.10    4.90
   2   7   2   42.70    4.20
   2   7   2   44.50    4.10
   2   7   2   36.90    4.00
   3  -7   2  231.68   12.60
   3  -7   2  212.38   11.90
   3  -7   2  200.18   11.40
  -3   7  -2  188.38   10.90
   3   7   2  188.38   11.00
   3   7   2  208.28   10.70
  -3   7  -2  198.08   10.30
   4  -7   2  117.49    9.40
   4  -7   2  113.79    7.90
   4  -7   2  103.59    7.10
  -4   7  -2  116.09    6.70
   4   7   2  109.19    7.80
  -4   7  -2  109.49    8.60
  -4   7  -2  117.29    6.80
   4   7   2  106.49    6.40
   5  -7   2   48.20    4.20
   5  -7   2   48.50    4.00
  -5   7  -2   51.19    4.20
   5   7   2   55.49    4.80
  -5   7  -2   47.50    4.00
   5   7   2   49.20    3.80
  -5   7  -2   46.80    4.00
   6  -7   2  209.88   10.00
  -6   7  -2  212.18    9.50
   6   7   2  205.78    9.50
   6   7   2  201.28   10.20
  -6   7  -2  206.58    9.80
   5  -8  -2  111.99    6.10
  -5   8   2  115.69    6.10
  -5   8   2  114.79    5.80
   4  -8  -2   35.00    3.20
  -4   8   2   38.70    3.30
  -4   8   2   35.60    2.90
   3  -8  -2  197.58   10.00
  -3   8   2  178.58    9.30
  -3   8   2  193.48    9.60
  -3   8   2  194.78    9.50
   2  -8  -2   70.69    5.00
  -2  -8   2   69.19    4.90
  -2   8   2   70.89    5.00
   1  -8  -2  411.06   18.50
  -1  -8   2  404.56   17.80
  -1   8   2  341.47   19.10
  -1   8   2  437.56   18.20
   0  -8   2   29.10    2.90
   0  -8  -2   30.00    2.90
   0   8   2   22.60    3.50
   1  -8   2  178.58   10.70
   1  -8   2  174.58   12.30
  -1  -8  -2  122.69    9.00
   1  -8   2  155.98    8.30
   1   8   2  139.99    7.90
   1   8   2  159.88    8.20
   2  -8   2   58.29    4.50
   2  -8   2   63.19    5.20
   2  -8   2   56.59    4.10
   2   8   2   47.40    3.90
   2   8   2   48.80    3.80
   3  -8   2  186.88   10.20
   3   8   2  193.48    9.90
   3   8   2  170.88    9.20
   4  -8   2  116.19    6.10
  12   0  -3   26.40    3.20
 -12   0   3   24.90    2.50
  12   0  -3   23.10    2.10
 -11   0   3   25.20    4.00
  11   0  -3   24.60    3.40
  11   0  -3   27.20    2.90
 -11   0   3   22.60    7.20
 -11   0   3   26.10    3.30
  10   0  -3 1041.70   45.10
 -10   0   3 1020.70   46.10
  10   0  -3 1051.49   47.10
 -10   0   3 1042.70   44.30
  10   0  -3 1072.89   43.20
   9   0  -3  191.38    9.90
   9   0  -3  192.68   10.20
  -9   0   3  191.98   10.90
   9   0  -3  191.78   12.80
  -9   0   3  217.98   22.20
  -9   0   3  174.78   11.90
   9   0  -3  198.48   11.40
  -8   0   3   44.60    9.60
   8   0  -3   65.19    4.70
  -8   0   3   79.69    9.60
   8   0  -3   56.69    6.20
  -8   0   3   53.29   11.60
   8   0  -3   60.29    4.70
   7   0  -3  131.79    7.00
  -7   0   3  123.69    6.50
   7   0  -3  120.29    7.00
   7   0  -3  105.49    9.00
   7   0  -3  141.49    7.20
  -7   0   3  119.39   10.40
  -7   0   3  123.09   14.40
  -7   0   3  126.99    8.10
   7   0  -3  120.69    7.90
  -7   0   3  129.49    8.90
  -6   0   3 1812.32   70.99
   6   0  -3 1691.83   70.39
  -6   0   3 1779.62   70.99
  -6   0   3 1847.12   81.29
  -6   0   3 1706.23   73.89
  -6   0   3 1660.23   70.29
   6   0  -3 1666.13   70.49
  -5   0   3 2014.70   82.99
  -5   0   3 2024.90   81.09
  -5   0   3 2031.10   91.29
   5   0  -3 1952.10   80.49
  -5   0   3 1985.70   80.49
   4   0  -3  595.64   26.30
  -4   0   3  637.54   31.80
  -4   0   3  610.14   27.70
  -4   0   3  711.33   27.10
  -3   0   3 4740.03  178.58
   3   0  -3 3928.91  178.68
  -3   0   3 4763.62  182.68
   2   0  -3 1922.01   80.39
  -2   0   3 2117.39   80.79
  -2   0   3 1976.10   83.89
  -2   0   3 2224.48   80.69
   2   0  -3 1795.72   80.89
   1   0  -3 2422.56  102.19
  -1   0   3 2735.13  101.39
  -1   0   3 2464.95  101.99
   0   0  -3 3947.30  159.68
   0   0  -3 3820.52  154.48
  -1   0  -3  134.29    7.10
   1   0   3  126.69    6.90
  -1   0  -3  135.19   10.70
   2   0   3    2.50    1.00
   2   0   3    1.00    0.80
  -2   0  -3    3.00    1.00
  -2   0  -3    5.60    3.40
  -3   0  -3 1726.13   84.69
  -3   0  -3 1784.32   76.19
   3   0   3 1912.81   75.99
   3   0   3 1949.01   74.39
  -3   0  -3 1813.62   74.89
  -4   0  -3  270.87   13.60
   4   0   3  290.37   14.80
  -4   0  -3  278.47   13.60
   4   0   3  272.67   12.60
  -4   0  -3  254.67   21.80
   4   0   3  273.67   12.70
  -5   0  -3    6.20    2.20
  -5   0  -3    6.50    6.50
   5   0   3    2.20    2.00
   5   0   3    5.20    1.60
  -5   0  -3   -0.30    1.50
   5   0   3    3.50    1.10
  -5   0  -3    0.00    1.50
   5   0   3    3.20    1.60
   5   0   3    1.70    1.70
   6   0   3  389.86   16.80
  -6   0  -3  385.96   20.10
   6   0   3  364.66   25.90
   6   0   3  395.66   21.40
  -6   0  -3  371.76   18.50
  -6   0  -3  379.16   18.40
  -6   0  -3  387.36   21.90
   6   0   3  410.76   20.90
  -6   0  -3  337.87   33.90
   7   0   3 3761.12  152.48
  -7   0  -3 3650.13  150.68
   7   0   3 3624.14  155.98
  -7   0  -3 3598.44  152.18
  -7   0  -3 3737.73  147.79
  -8   0  -3  131.19    8.70
  -8   0  -3  141.19   10.00
   8   0   3  123.19    9.60
   8   0   3  119.99    7.80
  -9   0  -3  194.18   10.30
  -9   0  -3  187.18   11.20
   9   0   3  182.68    9.30
   9   0   3  195.48   11.70
  10   0   3  189.68    9.50
 -10   0  -3  217.08   10.30
  10   0   3  213.78   10.50
 -12  -1   3   44.30    3.50
  12  -1  -3   45.60    3.60
  12   1  -3   39.00    3.50
 -12   1   3   42.30    3.40
  11  -1  -3   62.19    5.40
 -11  -1   3   61.79    5.00
  11  -1  -3   66.29    4.60
  11   1  -3   61.19    5.70
  11   1  -3   67.29    4.90
  11   1  -3   64.89    4.30
 -11   1   3   66.29    4.40
 -11   1   3   69.79    5.20
  10  -1  -3  140.39   10.00
 -10  -1   3  140.69    9.30
  10  -1  -3  141.49    8.40
  10   1  -3  124.99    8.70
 -10   1   3  142.39    8.50
  10   1  -3  142.89    8.90
  10   1  -3  138.69    8.90
  10   1  -3  137.49    7.50
  10   1  -3  135.49   10.20
 -10   1   3  145.29    9.60
  -9  -1   3  136.39    9.30
   9  -1  -3  124.19    9.50
   9  -1  -3  127.09    8.20
  -9  -1   3  135.59   16.80
   9  -1  -3  117.99    6.60
  -9  -1   3  135.19    7.70
   9   1  -3  127.99    7.50
  -9   1   3  129.89    8.60
  -9   1   3  123.99    9.10
  -9   1   3  124.29    6.60
   9   1  -3  137.79    8.90
   9   1  -3  107.49    9.50
   9   1  -3  127.79    7.60
   9   1  -3  127.29    7.40
  -8  -1   3 1545.55   63.49
   8  -1  -3 1494.25   62.59
   8  -1  -3 1517.65   63.09
  -8  -1   3 1524.05   70.59
   8  -1  -3 1591.14   64.39
  -8  -1   3 1502.65   65.29
   8   1  -3 1557.24   62.89
   8   1  -3 1588.14   63.09
  -8   1   3 1511.75   62.59
   8   1  -3 1482.85   66.39
   8   1  -3 1523.45   62.99
  -8   1   3 1492.65   64.59
  -8   1   3 1557.34   80.89
   8   1  -3 1460.55   64.39
   7  -1  -3  436.96   19.90
   7  -1  -3  449.95   20.10
  -7  -1   3  463.65   30.10
  -7  -1   3  448.26   22.10
   7  -1  -3  427.86   22.60
   7  -1  -3  452.65   20.10
   7  -1  -3  451.95   21.30
  -7  -1   3  428.36   25.10
  -7   1   3  477.95   32.30
  -7   1   3  465.55   20.40
   7   1  -3  476.65   20.30
  -7   1   3  466.45   20.30
  -7   1   3  476.85   22.40
  -7   1   3  437.36   24.10
  -7   1   3  432.16   21.50
  -7   1   3  435.06   20.20
   7   1  -3  453.95   20.00
   7   1  -3  454.95   20.20
   7   1  -3  448.96   21.50
  -7   1   3  419.46   22.30
   6  -1  -3   71.49    4.50
  -6  -1   3   63.99    6.90
  -6  -1   3   66.19    8.50
  -6  -1   3   55.49    6.30
   6  -1  -3   70.99    6.20
   6   1  -3   65.19    4.10
  -6   1   3   62.69    4.40
  -6   1   3   57.89    6.40
  -6   1   3   60.19    4.40
  -6   1   3   63.39    5.30
  -6   1   3   51.69    8.90
   6   1  -3   61.19    4.20
  -6   1   3   65.99    5.60
  -5  -1   3  624.24   32.10
   5  -1  -3  592.34   25.70
  -5  -1   3  591.04   28.90
   5  -1  -3  604.74   25.60
  -5   1   3  642.74   33.70
   5   1  -3  600.14   25.80
  -5   1   3  627.84   27.30
  -5   1   3  593.44   26.30
   5   1  -3  599.84   25.50
  -5   1   3  598.24   25.90
   4  -1  -3  341.47   15.40
  -4  -1   3  363.56   14.70
  -4  -1   3  345.47   19.20
  -4   1   3  355.66   15.60
  -4   1   3  383.16   16.80
   4   1  -3  347.17   15.20
  -4   1   3  352.06   20.80
  -3  -1   3 3862.61  157.38
  -3  -1   3 4103.09  155.18
   3  -1  -3 3914.71  155.38
  -3  -1   3 4159.88  155.88
  -3   1   3 4149.69  156.48
  -3   1   3 3802.12  160.48
   3   1  -3 3830.82  154.98
   3   1  -3 3472.65  155.18
  -3   1   3 3827.22  155.28
  -2  -1   3 1035.10   42.70
  -2  -1   3 1093.49   44.20
  -2  -1   3 1052.99   43.50
  -2  -1   3 1032.20   45.10
  -2   1   3 1091.29   42.40
   2   1  -3  924.41   42.50
  -2   1   3 1119.59   43.30
  -2   1   3 1020.10   46.70
  -1  -1   3 5552.64  203.18
   1   1  -3 4860.51  203.18
   1   1  -3 4978.30  204.28
   0   1  -3 5976.60  236.68
   0   1   3 5947.60  236.48
   1  -1   3  345.97   15.00
  -1  -1  -3  339.87   14.90
  -1  -1  -3  332.07   19.90
   1   1   3  318.67   14.40
   1   1   3  322.67   15.40
  -1   1  -3  329.07   19.90
  -1   1  -3  323.57   14.50
   1   1   3  343.07   15.30
  -2  -1  -3 8514.25  322.57
  -2   1  -3 7585.14  328.47
   3  -1   3 4678.13  183.98
  -3  -1  -3 4944.71  199.28
  -3  -1  -3 4673.53  182.48
  -3  -1  -3 4393.46  182.48
  -3   1  -3 4083.09  192.88
  -3   1  -3 4602.14  182.58
  -3   1  -3 4539.95  182.88
   3   1   3 4483.95  183.58
   3   1   3 4667.23  182.18
   4  -1   3 1112.89   47.70
  -4  -1  -3 1130.49   58.09
  -4  -1  -3 1099.89   45.50
  -4  -1  -3 1075.99   45.50
  -4  -1  -3 1122.19   48.00
   4  -1   3 1023.70   47.60
   4   1   3 1126.89   45.30
   4   1   3 1127.49   45.20
  -4   1  -3 1069.69   46.00
  -4   1  -3 1139.39   46.00
   4   1   3 1129.49   47.20
  -4   1  -3 1004.40   61.09
   4   1   3 1038.50   44.90
  -4   1  -3 1040.70   47.20
   4   1   3 1022.00   46.40
  -5  -1  -3   11.40    2.30
   5  -1   3   10.20    2.80
  -5  -1  -3   14.30    3.10
  -5  -1  -3    5.80    5.20
  -5  -1  -3    8.90    2.60
   5  -1   3    4.90    1.60
   5  -1   3    6.60    2.40
  -5   1  -3    7.30    2.50
   5   1   3    3.30    1.30
   5   1   3    8.40    1.60
  -5   1  -3    4.60    1.60
   5   1   3    6.20    1.70
   5   1   3    6.80    2.70
  -5   1  -3    7.60    2.10
  -6  -1  -3  280.97   15.90
   6  -1   3  281.27   19.80
  -6  -1  -3  294.27   13.50
   6  -1   3  291.67   17.20
   6  -1   3  291.97   17.90
  -6  -1  -3  276.57   27.60
  -6   1  -3  298.77   16.50
   6   1   3  304.47   22.50
   6   1   3  283.67   13.70
   6   1   3  282.97   15.60
   6   1   3  283.27   13.90
   6   1   3  292.57   13.80
  -6   1  -3  293.97   14.90
   6   1   3  285.87   17.00
  -6   1  -3  300.67   15.20
  -6   1  -3  287.67   15.00
   7  -1   3 1632.44   69.29
   7  -1   3 1599.34   65.89
  -7  -1  -3 1572.84   67.39
  -7  -1  -3 1554.54   86.79
   7   1   3 1459.35   71.39
  -7   1  -3 1608.54   65.89
  -7   1  -3 1369.96   70.69
  -7   1  -3 1565.34   69.29
  -7   1  -3 1601.24   68.19
  -7   1  -3 1645.44   66.19
   7   1   3 1696.73   64.49
   7   1   3 1569.94   69.59
   7   1   3 1632.04   67.49
  -8  -1  -3  257.67   15.70
  -8  -1  -3  276.37   14.50
   8  -1   3  282.87   13.30
   8  -1   3  279.47   16.20
  -8   1  -3  291.47   15.50
  -8   1  -3  284.77   13.20
   8   1   3  282.47   14.50
   8   1   3  266.17   16.20
  -8   1  -3  273.97   16.10
  -9  -1  -3  169.08   10.00
  -9  -1  -3  178.08    8.90
   9  -1   3  130.59   12.00
   9   1   3  163.78   10.10
  -9   1  -3  167.88   11.50
  -9   1  -3  150.48   11.20
   9   1   3  169.48    8.80
  10  -1   3    8.10    1.60
 -10  -1  -3   11.00    1.70
  10  -1   3    5.90    1.10
 -10   1  -3    7.50    1.10
  11  -2  -3  221.58   12.60
 -11  -2   3  234.98   11.80
  11   2  -3  233.78   11.80
  11   2  -3  236.98   10.70
  11   2  -3  239.38   11.90
 -11   2   3  235.68   11.50
 -10  -2   3  447.96   20.90
 -10  -2   3  404.96   38.90
  10  -2  -3  412.76   21.70
  10  -2  -3  417.46   19.70
  10   2  -3  427.36   20.20
 -10   2   3  438.56   18.20
  10   2  -3  443.16   19.50
 -10   2   3  435.06   21.40
 -10   2   3  439.56   20.50
  10   2  -3  420.36   19.30
  10   2  -3  446.86   20.90
  -9  -2   3  743.93   43.30
  -9  -2   3  722.53   33.00
   9  -2  -3  738.03   34.20
   9  -2  -3  740.73   32.10
  -9   2   3  700.83   30.70
   9   2  -3  717.33   31.20
  -9   2   3  723.33   33.50
   9   2  -3  709.53   31.20
  -9   2   3  680.93   30.60
   9   2  -3  718.33   32.60
  -9   2   3  717.23   32.80
   9   2  -3  709.23   31.10
  -8  -2   3  332.57   17.50
  -8  -2   3  327.47   24.60
  -8  -2   3  308.17   23.00
   8  -2  -3  328.17   16.50
   8  -2  -3  337.57   18.50
  -8   2   3  337.87   16.20
  -8   2   3  333.57   16.00
   8   2  -3  337.57   17.20
   8   2  -3  348.17   15.80
   8   2  -3  330.87   15.80
  -8   2   3  345.17   17.50
  -8   2   3  314.87   20.60
  -8   2   3  331.07   15.90
  -8   2   3  321.37   17.80
   7  -2  -3   98.29    7.80
  -7  -2   3  100.89   11.60
   7  -2  -3  105.99    6.80
  -7  -2   3   99.69    7.10
  -7  -2   3  104.79   11.00
  -7   2   3   96.19    7.30
  -7   2   3   89.09    6.30
   7   2  -3   98.19    6.10
   7   2  -3   98.29    6.10
  -7   2   3   94.79    7.70
  -7   2   3   97.89    6.40
   7   2  -3   99.09    6.00
  -7   2   3   96.79    6.50
  -7   2   3   95.29    8.50
   7   2  -3   92.49    7.00
   6  -2  -3  655.23   33.50
   6  -2  -3  673.23   29.20
  -6  -2   3  699.93   36.10
  -6  -2   3  669.33   34.20
   6   2  -3  655.73   28.40
  -6   2   3  633.84   28.70
   6   2  -3  681.93   28.20
  -6   2   3  643.24   31.10
  -6   2   3  640.44   39.10
  -5  -2   3 1205.28   54.09
  -5  -2   3 1158.98   52.99
  -5   2   3 1161.08   57.59
   5   2  -3 1107.29   47.90
  -5   2   3 1163.68   48.40
  -5   2   3 1155.78   48.60
  -5   2   3 1223.38   50.79
   5   2  -3 1178.08   47.80
  -4  -2   3 5664.63  223.88
  -4  -2   3 5678.53  223.98
  -4   2   3 5578.94  222.78
  -4   2   3 5667.13  228.18
   4   2  -3 5487.75  219.18
  -4   2   3 5375.96  220.18
  -4   2   3 5183.98  221.48
  -3  -2   3 1397.06   58.09
  -3  -2   3 1373.46   56.59
  -3  -2   3 1427.66   57.39
  -3   2   3 1352.96   54.69
   3   2  -3 1297.37   53.99
  -3   2   3 1322.17   56.19
  -3   2   3 1247.98   60.59
  -2  -2   3  228.68   12.40
  -2  -2   3  226.88   11.90
  -2   2   3  231.88   11.10
   2   2  -3  206.08    9.90
  -2   2   3  207.88    9.70
  -2   2   3  193.68   13.90
   1  -2  -3 2387.46   96.39
  -1  -2   3 2365.26   98.09
   1  -2  -3 2369.96  101.19
  -1  -2   3 2481.25   98.59
  -1   2   3 2347.97   96.69
  -1   2   3 2380.36   95.49
   0  -2  -3 2223.78   94.79
   0  -2   3 2365.36   92.19
   0  -2   3 2376.66   91.39
   0   2   3 2135.09   89.99
   0   2   3 2060.69   89.59
   0   2   3 2113.29   88.49
   1  -2   3 2496.25  100.69
   1  -2   3 2734.63  102.59
  -1  -2  -3 2374.26  104.09
   1   2   3 2329.77   96.79
   1   2   3 2414.06   98.09
  -1   2  -3 2222.88   96.59
   1   2   3 2351.56   98.29
   2  -2   3 4472.05  165.08
  -2  -2  -3 4040.50  165.48
   2  -2   3 3709.73  159.78
  -2   2  -3 3806.62  155.78
   2   2   3 3772.82  157.18
   2   2   3 3945.61  155.78
   2   2   3 3563.14  158.08
  -3  -2  -3 1211.78   59.59
   3  -2   3 1194.58   53.69
   3   2   3 1192.68   49.00
   3   2   3 1125.39   48.80
  -3   2  -3 1140.59   49.50
   3   2   3 1221.48   50.69
  -3   2  -3 1200.98   49.30
   4  -2   3  601.54   31.30
   4  -2   3  615.24   28.50
  -4  -2  -3  622.04   37.80
  -4  -2  -3  587.04   27.60
   4  -2   3  560.14   28.60
   4   2   3  645.44   26.40
  -4   2  -3  608.34   27.40
   4   2   3  576.14   26.40
   4   2   3  639.64   28.40
  -4   2  -3  584.54   28.20
  -4   2  -3  596.94   26.70
  -4   2  -3  557.74   26.90
   5  -2   3  779.02   37.00
   5  -2   3  862.31   38.40
  -5  -2  -3  868.41   37.20
   5  -2   3  781.02   41.30
   5  -2   3  781.52   37.20
  -5  -2  -3  781.82   48.60
   5   2   3  769.92   39.10
  -5   2  -3  805.42   36.40
   5   2   3  862.01   35.80
   5   2   3  824.62   37.10
  -5   2  -3  859.31   36.70
   5   2   3  870.11   35.40
  -5   2  -3  846.92   38.00
  -5   2  -3  824.62   36.40
   5   2   3  829.12   37.90
   5   2   3  855.91   35.60
  -6  -2  -3  432.36   33.90
   6  -2   3  454.75   23.30
  -6  -2  -3  447.76   21.80
   6  -2   3  402.96   21.60
   6  -2   3  423.66   21.60
   6  -2   3  402.56   26.60
  -6   2  -3  456.55   21.50
   6   2   3  485.25   20.40
   6   2   3  460.45   20.60
   6   2   3  435.46   23.30
   6   2   3  460.25   24.50
  -6   2  -3  475.35   23.30
   6   2   3  435.26   22.00
  -6   2  -3  444.26   21.50
  -6   2  -3  450.55   23.20
   7  -2   3 1018.10   44.70
  -7  -2  -3  927.01   58.39
  -7   2  -3  970.90   44.10
   7   2   3  970.30   41.20
  -7   2  -3  962.70   42.20
   7   2   3  953.30   40.90
  -7   2  -3 1011.10   42.60
   7   2   3  979.60   41.00
  -7   2  -3  965.30   42.50
   8  -2   3  638.44   29.60
   8   2   3  608.74   30.30
  -8   2  -3  623.14   28.00
   8   2   3  618.14   26.00
  -8   2  -3  620.74   27.20
  -8   2  -3  583.24   29.50
  -8   2  -3  636.54   27.40
  -8   2  -3  631.14   29.10
   9  -2   3  147.99    8.30
   9  -2   3  149.39    8.60
  -9  -2  -3  149.19    8.90
  -9   2  -3  150.38    8.50
   9   2   3  136.29    7.80
  -9   2  -3  134.89    6.60
   9   2   3  138.09    9.20
 -11  -3   3   30.50    2.40
  11  -3  -3   28.50    3.20
  11   3  -3   28.20    3.00
  11   3  -3   30.40    2.50
  11   3  -3   32.90    3.90
 -11   3   3   27.90    2.70
  10  -3  -3   30.80    4.00
 -10  -3   3   34.90    3.30
 -10  -3   3   26.20    9.00
 -10   3   3   37.00    4.70
 -10   3   3   26.70    4.50
 -10   3   3   25.80    3.10
  10   3  -3   22.80    3.10
 -10   3   3   27.00    2.30
  10   3  -3   32.30    2.90
  10   3  -3   34.10    3.60
  10   3  -3   28.00    2.90
   9  -3  -3  479.95   24.70
   9  -3  -3  452.75   22.30
  -9  -3   3  522.35   23.50
  -9  -3   3  507.05   46.20
  -9   3   3  510.75   22.40
   9   3  -3  537.55   22.70
  -9   3   3  500.95   22.50
   9   3  -3  504.55   22.60
  -9   3   3  482.35   24.30
   9   3  -3  538.55   24.00
  -9   3   3  437.86   23.20
   9   3  -3  538.45   22.80
  -9   3   3  507.25   24.00
   8  -3  -3  407.66   20.70
  -8  -3   3  429.66   43.40
   8  -3  -3  411.86   18.50
  -8  -3   3  411.96   19.40
  -8  -3   3  361.46   26.40
  -8  -3   3  388.06   25.80
   8  -3  -3  367.56   18.50
  -8   3   3  403.16   18.60
   8   3  -3  372.46   18.10
   8   3  -3  397.26   19.50
   8   3  -3  358.96   18.00
   8   3  -3  367.86   17.90
  -8   3   3  389.56   19.70
  -8   3   3  377.26   20.20
  -8   3   3  382.36   18.30
  -8   3   3  389.66   18.60
  -7  -3   3  232.18   13.30
   7  -3  -3  224.38   12.10
  -7  -3   3  265.17   32.50
  -7  -3   3  235.98   17.90
   7  -3  -3  203.08   12.10
   7  -3  -3  231.38   13.60
   7   3  -3  201.48   11.50
   7   3  -3  236.68   11.70
  -7   3   3  224.48   13.00
   7   3  -3  230.18   11.50
  -7   3   3  221.08   12.00
  -7   3   3  228.18   15.70
  -7   3   3  231.08   12.00
  -7   3   3  241.08   12.30
   7   3  -3  217.98   12.60
  -6  -3   3  123.79    7.60
  -6  -3   3  129.79   12.20
  -6  -3   3  135.69   11.30
   6  -3  -3  126.39    8.50
   6  -3  -3  104.19    7.70
  -6   3   3  122.09    8.30
   6   3  -3  128.19    7.00
  -6   3   3  121.49    7.60
   6   3  -3  103.49    9.00
   6   3  -3  125.69    7.40
  -6   3   3  104.29    9.40
  -6   3   3  112.69    7.30
  -6   3   3  123.59    7.50
  -5  -3   3  235.78   14.40
  -5  -3   3  222.48   15.70
  -5  -3   3  246.88   28.10
   5  -3  -3  194.28   12.10
   5   3  -3  211.78   10.30
  -5   3   3  234.58   13.70
  -5   3   3  222.48   11.10
  -5   3   3  193.58   11.10
  -5   3   3  197.88   11.60
  -5   3   3  216.98   13.20
  -4  -3   3  437.46   23.90
  -4  -3   3  443.16   21.20
  -4   3   3  446.56   19.30
  -4   3   3  414.36   19.40
   4   3  -3  428.26   18.50
  -3  -3   3  504.45   23.40
  -3  -3   3  474.15   24.30
   3   3  -3  437.36   19.00
  -3   3   3  390.56   22.00
  -3   3   3  493.55   22.30
  -3   3   3  453.35   19.90
   2  -3  -3    7.30    4.60
   2   3  -3    3.60    1.70
  -1  -3   3  891.31   40.70
   1  -3  -3  877.51   42.40
   1  -3  -3  821.72   42.40
  -1  -3   3  892.31   40.10
   1  -3  -3  924.71   38.20
  -1   3   3  902.71   38.10
  -1   3   3  873.21   36.30
   0  -3  -3 2540.85  103.49
   0  -3   3 2616.74  103.99
   0  -3  -3 2403.06  106.89
   0  -3  -3 2379.16  107.09
   0   3   3 2246.78  100.79
   0   3   3 2390.66  100.19
   0   3   3 2619.64  101.89
   0   3   3 2782.62  102.89
  -1  -3  -3  860.01   49.10
   1  -3   3  920.01   43.50
  -1  -3  -3  976.30   46.20
  -1  -3  -3  976.90   43.00
  -1   3  -3  876.51   37.80
   1   3   3  910.21   38.30
   1   3   3  987.70   40.60
   1   3   3  900.91   39.60
   2  -3   3  203.08   15.00
   2  -3   3  241.98   15.40
  -2  -3  -3  222.28   15.30
  -2  -3  -3  209.98   17.20
  -2   3  -3  203.48   11.30
   2   3   3  221.88   11.10
   2   3   3  259.47   11.20
   2   3   3  229.48   12.20
  -2   3  -3  216.28   10.90
   2   3   3  266.17   13.30
  -3  -3  -3 4055.19  178.98
   3  -3   3 4134.09  169.98
   3  -3   3 4069.89  170.68
   3  -3   3 4212.48  174.48
   3  -3   3 4750.42  194.98
   3  -3   3 3964.80  168.78
  -3  -3  -3 4437.16  175.88
  -3   3  -3 4083.29  168.08
  -3   3  -3 4262.17  167.78
   3   3   3 3816.62  167.28
   3   3   3 4360.36  169.98
   3   3   3 3774.72  168.78
   3   3   3 4395.06  167.58
   4  -3   3  453.05   27.90
  -4  -3  -3  475.35   31.90
  -4  -3  -3  526.15   33.80
   4  -3   3  465.85   22.80
   4  -3   3  447.26   23.00
   4  -3   3  479.75   23.90
  -4   3  -3  460.15   21.90
   4   3   3  450.45   21.00
  -4   3  -3  428.16   21.90
  -4   3  -3  469.95   21.70
   4   3   3  505.25   21.50
   4   3   3  503.25   21.50
   4   3   3  456.85   22.60
  -4   3  -3  424.26   22.80
  -5  -3  -3  479.35   31.10
   5  -3   3  472.45   23.90
   5  -3   3  453.45   28.90
  -5  -3  -3  477.55   37.50
   5  -3   3  535.75   29.90
   5  -3   3  448.76   23.80
  -5   3  -3  505.65   23.10
   5   3   3  494.75   22.30
  -5   3  -3  487.25   23.20
   5   3   3  476.95   23.70
  -5   3  -3  457.85   22.90
   5   3   3  477.65   24.50
   5   3   3  516.35   22.50
   5   3   3  489.95   22.00
  -6  -3  -3 1712.43   86.49
   6  -3   3 1852.91   73.29
   6  -3   3 1624.24   71.69
   6  -3   3 1671.53   72.19
  -6  -3  -3 1519.65   81.69
   6  -3   3 1534.35   79.29
   6   3   3 1721.83   70.79
   6   3   3 1774.82   72.69
   6   3   3 1707.63   70.29
  -6   3  -3 1711.03   71.59
   6   3   3 1811.12   70.79
  -6   3  -3 1780.22   71.99
   6   3   3 1603.94   73.69
  -6   3  -3 1794.82   73.49
  -6   3  -3 1741.03   71.69
  -7  -3  -3    5.70    2.20
   7  -3   3   12.00    3.10
  -7   3  -3   10.30    2.30
  -7   3  -3    8.20    2.40
   7   3   3    7.50    1.90
  -7   3  -3   13.30    2.60
   7   3   3    6.00    2.20
   7   3   3   11.50    2.10
   7   3   3    7.60    1.60
  -7   3  -3    7.60    2.20
  -8  -3  -3    3.30    1.40
   8  -3   3    1.80    1.30
  -8   3  -3    4.70    1.30
   8   3   3    4.30    1.00
  -8   3  -3    6.00    1.90
  -8   3  -3    4.10    1.80
  -8   3  -3    4.60    2.40
   8   3   3    3.00    1.40
  -9  -3  -3  128.19    8.70
   9  -3   3  114.09    6.70
   9   3   3  135.69    7.80
  -9   3  -3  117.99    7.80
  -9   3  -3  124.59    6.40
  10  -4  -3   46.90    4.10
  10   4  -3   42.70    3.30
  10   4  -3   44.90    3.60
  10   4  -3   39.10    4.80
 -10   4   3   46.40    3.90
  10   4  -3   48.00    3.30
 -10   4   3   45.30    3.00
 -10   4   3   40.20    3.70
  -9  -4   3   34.20   10.80
   9  -4  -3   34.90    4.10
  -9  -4   3   39.70    3.00
   9  -4  -3   29.00    4.00
  -9   4   3   29.40    3.50
   9   4  -3   30.60    3.60
   9   4  -3   34.30    3.20
   9   4  -3   33.10    3.20
   9   4  -3   31.00    3.20
  -9   4   3   30.30    2.90
  -9   4   3   38.50    3.50
  -9   4   3   38.80    4.50
   8  -4  -3  225.58   12.00
  -8  -4   3  225.78   11.30
  -8   4   3  219.28   12.00
   8   4  -3  219.78   11.50
   8   4  -3  222.48   12.30
   8   4  -3  231.98   11.50
   8   4  -3  218.18   11.50
  -8   4   3  232.98   12.00
  -8   4   3  237.08   16.50
  -7  -4   3  415.56   19.00
   7  -4  -3  412.56   20.10
   7  -4  -3  439.46   21.60
  -7  -4   3  425.76   43.10
  -7  -4   3  392.76   20.60
   7   4  -3  388.16   20.10
   7   4  -3  422.06   19.40
  -7   4   3  427.36   20.00
   7   4  -3  423.26   19.40
  -7   4   3  422.36   19.80
  -7   4   3  417.96   20.70
  -7   4   3  425.56   20.00
   7   4  -3  429.66   19.20
  -6  -4   3  155.08    8.20
  -6  -4   3  168.88   24.80
   6  -4  -3  167.28   10.40
   6  -4  -3  150.08   10.30
  -6  -4   3  121.19   13.70
   6   4  -3  160.68    8.40
  -6   4   3  166.08   13.00
   6   4  -3  128.99    8.50
  -6   4   3  157.78    9.30
  -6   4   3  169.58    9.80
   6   4  -3  159.28    8.60
  -6   4   3  154.98    9.10
   5  -4  -3  883.51   39.40
   5  -4  -3  864.41   38.70
  -5  -4   3  937.31   64.09
  -5  -4   3  863.01   45.30
  -5   4   3  831.72   38.60
  -5   4   3  836.12   38.00
  -5   4   3  942.31   38.20
  -5   4   3  926.01   38.30
  -5   4   3  893.31   42.10
   4  -4  -3  814.12   36.40
  -4  -4   3  887.81   58.49
  -4  -4   3  840.02   41.80
   4  -4  -3  830.12   40.30
  -4   4   3  847.92   38.70
  -4   4   3  830.22   35.00
  -4   4   3  717.13   35.40
  -4   4   3  842.62   35.30
  -4   4   3  757.92   35.10
   4   4  -3  834.52   33.90
   3  -4  -3  147.69    9.00
  -3  -4   3  147.39   15.10
  -3  -4   3  172.78   21.60
  -3  -4   3  164.28   12.80
   3  -4  -3  143.69    9.30
  -3   4   3  168.28   10.90
  -3   4   3  160.38    8.50
  -3   4   3  168.08    8.40
  -2  -4   3    3.70    2.80
   2  -4  -3    8.90    3.60
   2  -4  -3   18.80    6.10
  -2  -4   3   11.30    3.20
   2   4  -3    6.30    2.00
  -2   4   3    4.50    1.90
   2   4  -3    9.20    1.80
  -2   4   3    9.40    1.80
  -1  -4   3 1082.29   48.70
   1  -4  -3 1072.99   50.39
   1  -4  -3 1021.60   50.39
   1  -4  -3 1101.79   46.30
  -1   4   3 1009.30   46.60
  -1   4   3 1060.29   43.50
  -1   4   3 1115.59   47.00
  -1   4   3  993.00   43.50
   0  -4   3 1118.49   49.20
   0  -4   3  996.20   45.30
   0  -4  -3  915.41   41.50
   0  -4  -3 1035.40   48.20
   0  -4   3  916.91   43.50
   0  -4  -3  892.91   47.10
   0  -4  -3 1012.10   44.90
   0  -4   3  994.70   47.50
   0   4   3  991.70   40.60
   0   4   3 1026.00   42.90
   0   4   3  973.50   43.60
   0   4   3  919.01   40.60
   1  -4   3  242.98   14.30
  -1  -4  -3  242.68   17.60
   1  -4   3  220.08   12.80
   1  -4   3  264.07   26.70
   1  -4   3  221.48   14.50
  -1  -4  -3  243.58   16.10
   1  -4   3  241.18   17.20
  -1  -4  -3  237.58   12.60
  -1   4  -3  231.98   11.00
   1   4   3  238.28   11.60
   1   4   3  242.58   13.20
   1   4   3  245.78   11.50
   1   4   3  255.67   14.10
   2  -4   3  438.96   36.00
  -2  -4  -3  407.36   25.90
  -2  -4  -3  371.66   18.00
   2  -4   3  395.86   24.50
   2  -4   3  429.26   21.50
   2  -4   3  414.66   19.60
   2  -4   3  379.26   20.40
  -2  -4  -3  396.76   23.70
   2   4   3  401.26   21.10
   2   4   3  379.16   17.90
  -2   4  -3  364.96   18.10
   2   4   3  399.56   17.80
   2   4   3  400.16   20.30
   2   4   3  343.67   19.00
  -2   4  -3  387.06   17.60
   2   4   3  326.47   17.60
   3  -4   3  650.93   32.10
   3  -4   3  645.64   31.60
   3  -4   3  686.93   30.90
  -3  -4  -3  700.63   29.30
   3  -4   3  744.53   49.40
   3  -4   3  625.34   29.10
   3  -4   3  702.83   37.10
  -3  -4  -3  662.63   38.40
   3   4   3  646.84   30.50
   3   4   3  656.73   29.10
  -3   4  -3  643.24   29.50
  -3   4  -3  656.43   29.10
   3   4   3  607.84   28.90
   3   4   3  676.03   31.80
   3   4   3  661.33   29.00
   4  -4   3 1696.43   74.69
  -4  -4  -3 1743.23   81.99
   4  -4   3 1691.43   80.49
   4  -4   3 1735.53   73.59
  -4  -4  -3 1824.52   84.49
   4  -4   3 1919.41   76.89
   4   4   3 1735.03   71.79
  -4   4  -3 1592.24   72.29
  -4   4  -3 1706.83   72.39
  -4   4  -3 1743.33   72.19
   4   4   3 1690.13   76.29
  -4   4  -3 1698.83   73.59
   4   4   3 1755.42   71.49
   4   4   3 1731.23   74.59
   4   4   3 1748.13   71.79
   5  -4   3  168.38   11.10
   5  -4   3  138.99   15.80
  -5  -4  -3  170.88   17.90
   5  -4   3  173.08   11.50
  -5  -4  -3  184.08   18.40
   5  -4   3  174.08   10.40
   5  -4   3  176.18   11.40
   5   4   3  172.28    9.60
  -5   4  -3  181.18   10.80
   5   4   3  185.48   10.10
   5   4   3  185.58   11.20
   5   4   3  171.68   12.30
  -5   4  -3  174.98   10.50
  -5   4  -3  167.48   11.20
  -5   4  -3  180.38   10.50
   6  -4   3  742.93   35.10
   6  -4   3  795.22   35.20
   6  -4   3  827.32   36.40
  -6  -4  -3  792.32   51.69
   6   4   3  801.92   36.20
  -6   4  -3  792.72   35.30
  -6   4  -3  826.52   35.60
  -6   4  -3  798.42   36.50
   6   4   3  794.52   34.60
   6   4   3  773.32   34.50
  -6   4  -3  803.92   35.70
   7  -4   3  145.29    8.30
  -7  -4  -3  143.39    9.10
   7  -4   3  140.89    9.00
  -7   4  -3  146.99    9.60
  -7   4  -3  142.29    8.40
  -7   4  -3  138.19    9.00
   7   4   3  133.99    7.70
   7   4   3  125.79    8.10
   7   4   3  142.59    9.10
  -7   4  -3  135.39    8.60
   7   4   3  145.59    7.70
   8  -4   3  479.85   21.40
   8  -4   3  426.36   20.30
  -8  -4  -3  433.26   20.10
  -8  -4  -3  446.16   36.50
  -8   4  -3  442.66   19.70
  -8   4  -3  430.96   20.60
   8   4   3  431.06   19.00
  -8   4  -3  510.15   21.50
   8   4   3  419.46   19.10
 -10   5   3  269.47   11.70
  10   5  -3  256.27   12.30
  10   5  -3  282.87   12.50
 -10   5   3  287.47   14.40
  -9  -5   3  101.69   16.50
   9  -5  -3   96.19    6.00
   9  -5  -3   81.19    6.00
   9   5  -3   99.99    5.70
   9   5  -3   93.49    5.60
  -9   5   3   92.09    6.60
  -9   5   3   98.49    5.70
   9   5  -3   92.69    5.80
  -9   5   3   94.49    6.70
  -9   5   3   99.19    6.20
   9   5  -3   95.49    5.50
  -8  -5   3  191.18   24.90
   8  -5  -3  206.18   11.40
   8  -5  -3  183.98   10.40
   8   5  -3  207.28   10.30
  -8   5   3  206.58   10.80
   8   5  -3  211.18   10.50
  -8   5   3  204.78   10.40
  -8   5   3  195.78   11.10
   8   5  -3  209.98   10.30
  -8   5   3  203.58   10.60
   8   5  -3  198.78   12.60
   7  -5  -3  537.15   25.20
   7  -5  -3  515.95   24.40
  -7  -5   3  535.25   46.60
  -7   5   3  531.55   24.20
  -7   5   3  546.35   24.20
   7   5  -3  536.15   23.60
  -7   5   3  526.95   23.90
  -7   5   3  502.35   24.50
   7   5  -3  520.15   23.30
  -6  -5   3  534.95   37.00
   6  -5  -3  611.84   28.10
  -6  -5   3  671.63   52.79
   6  -5  -3  552.54   27.20
  -6   5   3  612.24   27.00
  -6   5   3  595.44   26.80
   6   5  -3  599.54   26.20
  -6   5   3  598.94   26.90
  -6   5   3  573.74   27.30
   6   5  -3  606.14   26.00
   5  -5  -3   40.70    4.20
  -5  -5   3   40.90    8.70
   5  -5  -3   31.70    4.10
  -5  -5   3   42.80   12.60
  -5   5   3   36.90    3.70
  -5   5   3   40.60    3.90
  -5   5   3   46.40    4.50
   5   5  -3   36.30    3.20
  -4  -5   3   47.40    8.10
  -4  -5   3   56.69    5.10
  -4  -5   3   44.90   25.30
   4  -5  -3   42.90    4.80
  -4   5   3   55.39    4.50
  -4   5   3   50.19    4.80
  -4   5   3   53.39    4.30
  -4   5   3   52.89    4.40
   4   5  -3   52.19    3.60
  -3  -5   3  167.48   11.00
   3  -5  -3  183.48   10.60
  -3  -5   3  172.68   14.10
  -3  -5   3  186.68    9.90
   3  -5  -3  175.48   10.40
  -3  -5   3  176.68   12.20
   3  -5  -3  186.18   14.20
  -3  -5   3  177.68   14.90
  -3  -5   3  202.28   25.70
  -3   5   3  167.38   10.20
  -3   5   3  193.18   13.00
  -3   5   3  176.58    9.70
  -3   5   3  193.18    9.80
  -3   5   3  182.58    9.40
  -2  -5   3  225.78   16.50
  -2  -5   3  224.78   13.40
   2  -5  -3  216.08   12.20
   2  -5  -3  251.57   16.10
  -2  -5   3  226.58   11.80
  -2  -5   3  223.68   14.00
   2  -5  -3  185.88   15.60
   2  -5  -3  227.18   12.20
  -2  -5   3  188.88   20.30
  -2  -5   3  265.07   28.60
  -2   5   3  223.88   13.90
  -2   5   3  222.18   10.90
  -2   5   3  217.98   11.00
  -1  -5   3  480.75   37.10
  -1  -5   3  524.65   30.10
  -1  -5   3  634.74   46.60
  -1  -5   3  577.14   25.30
   1  -5  -3  551.24   29.40
   1  -5  -3  578.74   29.20
  -1  -5   3  559.94   27.90
   1  -5  -3  538.65   25.20
  -1  -5   3  580.24   27.40
   1   5  -3  524.95   26.80
  -1   5   3  545.55   28.60
  -1   5   3  574.64   27.30
  -1   5   3  533.05   24.10
  -1   5   3  545.85   24.60
   0  -5  -3   54.69    7.90
   0  -5   3   63.99    8.60
   0  -5   3   62.89    5.30
   0  -5  -3   50.99    7.30
   0  -5  -3   47.70    4.40
   0  -5   3   52.49    6.00
   0  -5  -3   55.49    7.00
   0  -5   3   53.19    7.10
   0  -5   3   49.30    5.90
   0  -5   3   59.99   13.00
   0   5  -3   47.60    7.20
   0   5   3   60.59    4.20
   0   5   3   64.89    6.60
   0   5   3   47.60    5.90
   0   5   3   57.69    4.30
   1  -5   3  536.55   32.20
   1  -5   3  533.25   27.50
  -1  -5  -3  535.35   29.90
  -1  -5  -3  533.35   24.40
  -1  -5  -3  535.95   28.90
   1  -5   3  569.34   25.50
   1  -5   3  606.84   45.10
   1  -5   3  556.64   27.00
   1   5   3  524.05   23.80
   1   5   3  557.54   23.80
   1   5   3  487.75   25.20
   1   5   3  484.65   23.80
  -1   5  -3  533.35   23.10
   1   5   3  532.15   26.30
   1   5   3  565.24   27.40
  -1   5  -3  504.65   28.50
   2  -5   3  197.08   16.10
   2  -5   3  206.08   24.00
   2  -5   3  193.98   17.50
   2  -5   3  206.28   13.40
  -2  -5  -3  194.38   20.30
   2  -5   3  186.68   12.80
  -2  -5  -3  200.78   16.40
  -2  -5  -3  201.78   10.80
   2   5   3  184.08   10.50
   2   5   3  217.28   12.10
   2   5   3  206.28   10.50
  -2   5  -3  222.08   10.50
   2   5   3  186.28   13.30
   2   5   3  208.08   10.70
  -2   5  -3  168.58   10.70
  -2   5  -3  166.18   14.70
   3  -5   3 1459.95   76.79
  -3  -5  -3 1581.24   76.79
   3  -5   3 1715.53   69.39
   3  -5   3 1640.94   70.49
  -3  -5  -3 1719.13   67.59
   3  -5   3 1714.23   71.29
   3   5   3 1618.94   68.89
   3   5   3 1767.22   71.39
  -3   5  -3 1559.64   67.69
   3   5   3 1573.64   67.29
   3   5   3 1622.34   70.89
  -3   5  -3 1620.64   67.39
   3   5   3 1523.65   67.19
   4  -5   3  869.01   51.79
   4  -5   3  970.00   42.50
  -4  -5  -3  953.50   55.29
   4  -5   3  944.91   40.90
   4  -5   3  937.51   41.50
  -4   5  -3  866.81   39.60
  -4   5  -3  912.71   39.90
   4   5   3  892.91   40.50
   4   5   3  874.81   38.70
  -4   5  -3  893.21   39.70
   4   5   3  785.32   45.40
   4   5   3  906.41   39.20
   4   5   3  956.10   39.60
   5  -5   3  605.14   28.50
   5  -5   3  641.44   29.60
   5  -5   3  584.04   28.30
  -5  -5  -3  571.04   44.90
   5   5   3  613.94   26.90
   5   5   3  631.94   27.40
  -5   5  -3  597.84   27.80
  -5   5  -3  602.34   27.70
  -5   5  -3  621.84   27.70
  -5   5  -3  559.04   27.90
   5   5   3  615.34   28.40
   5   5   3  612.44   27.20
   6  -5   3   87.29    6.70
  -6  -5  -3   94.19    6.30
  -6  -5  -3   86.29   17.70
   6  -5   3   87.99    6.90
   6  -5   3   89.69    6.30
   6   5   3   94.99    6.20
   6   5   3   93.29    5.80
  -6   5  -3   90.89    6.60
  -6   5  -3  108.39    8.00
   6   5   3   94.69    6.20
   6   5   3   94.19    6.70
  -6   5  -3   90.49    6.60
  -6   5  -3   95.09    6.40
  -7  -5  -3  201.98   11.30
  -7  -5  -3  208.68   22.10
   7  -5   3  219.18   11.20
  -7   5  -3  203.68   10.90
   7   5   3  220.98   11.30
  -7   5  -3  209.48   10.80
  -7   5  -3  177.48   13.00
   7   5   3  209.08   10.10
   7   5   3  176.88   10.80
   7   5   3  209.28   10.00
  -7   5  -3  228.78   10.70
   8  -5   3  145.39    9.60
   8   5   3  180.78    7.90
   8   5   3  185.78    8.70
  -8   5  -3  185.18    8.80
  -8   5  -3  174.38    8.60
   9   6  -3  116.19    5.70
  -9   6   3  113.69    6.10
   9   6  -3  120.09    6.00
  -9   6   3  113.49    6.10
  -9   6   3  110.69    6.20
  -8  -6   3   18.00    7.00
   8  -6  -3   19.20    2.30
  -8   6   3   27.40    4.60
  -8   6   3   20.30    2.20
   8   6  -3   19.50    2.30
  -8   6   3   22.40    2.70
   8   6  -3   21.20    2.40
  -8   6   3   24.20    2.50
  -7  -6   3   13.60    6.90
   7  -6  -3   17.80    2.40
  -7   6   3   12.60    2.60
  -7   6   3   20.00    3.60
  -7   6   3   14.10    2.40
   7   6  -3   19.60    2.80
   7   6  -3   19.30    2.40
  -7   6   3   16.20    2.20
   7   6  -3   15.10    2.20
  -6  -6   3   76.09   16.40
   6  -6  -3   79.79    5.10
   6  -6  -3   84.19    6.00
  -6   6   3   81.59    5.70
  -6   6   3   81.69    6.00
  -6   6   3   84.99    5.50
  -6   6   3   89.59    6.40
   6   6  -3   79.29    5.20
   6   6  -3   90.89    5.70
   5  -6  -3  252.47   12.00
  -5  -6   3  229.28   33.60
  -5   6   3  246.48   13.10
   5   6  -3  245.08   12.00
   5   6  -3  236.78   11.40
  -5   6   3  241.28   12.50
  -5   6   3  231.08   12.20
  -5   6   3  254.27   12.50
  -4  -6   3  576.24   47.60
  -4  -6   3  559.94   25.30
  -4  -6   3  518.05   32.50
   4  -6  -3  546.45   25.20
  -4   6   3  499.25   26.80
  -4   6   3  530.05   24.10
  -4   6   3  537.85   24.10
  -4   6   3  531.25   25.10
  -3  -6   3  268.07   20.10
  -3  -6   3  262.77   13.10
  -3  -6   3  284.07   15.10
  -3  -6   3  281.87   31.40
   3  -6  -3  267.77   14.20
  -3   6   3  248.38   13.00
  -3   6   3  222.08   16.90
  -3   6   3  288.77   13.40
  -3   6   3  279.07   13.20
  -2  -6   3  622.44   47.30
  -2  -6   3  549.45   24.10
  -2  -6   3  498.65   26.20
  -2  -6   3  471.55   30.70
  -2  -6   3  555.54   26.30
  -2  -6   3  522.15   30.90
   2  -6  -3  524.25   24.70
  -2   6   3  533.15   23.70
  -2   6   3  519.85   28.50
  -2   6   3  538.65   23.60
  -2   6   3  499.35   23.50
  -1  -6   3  775.52   37.20
  -1  -6   3  787.92   36.90
  -1  -6   3  734.93   54.59
  -1  -6   3  716.33   40.20
   1  -6  -3  798.62   34.90
  -1  -6   3  780.92   43.00
  -1  -6   3  804.02   34.70
  -1   6   3  847.62   39.30
  -1   6   3  719.83   33.70
  -1   6   3  882.51   37.70
  -1   6   3  819.42   33.80
   0  -6   3  536.65   25.00
   0  -6   3  539.05   27.40
   0  -6   3  546.55   27.10
   0  -6  -3  535.55   24.70
   0  -6   3  484.35   32.50
   0  -6   3  600.34   45.30
   0   6   3  542.55   23.90
   0   6   3  551.84   24.10
   0   6   3  508.35   24.00
   0   6   3  511.15   28.00
   1  -6   3  190.68   12.40
   1  -6   3  179.48   22.30
   1  -6   3  178.38   10.80
   1  -6   3  156.68   11.80
  -1  -6  -3  176.78   10.20
   1  -6   3  191.88   17.90
   1   6   3  182.78    9.90
  -1   6  -3  194.18    9.40
   1   6   3  204.88   13.80
   1   6   3  166.18    9.80
   1   6   3  176.28   10.00
   2  -6   3  153.28   10.80
   2  -6   3  163.28    9.90
  -2  -6  -3  146.89    8.80
   2  -6   3  145.29   16.10
   2  -6   3  151.98   11.10
  -2  -6  -3  143.09   16.80
   2  -6   3  167.38   20.50
   2   6   3  139.79    8.70
  -2   6  -3  147.59    9.90
   2   6   3  132.29   11.90
  -2   6  -3  180.48   11.60
   2   6   3  136.69    9.50
   2   6   3  157.78    9.00
   3  -6   3   31.40    4.40
   3  -6   3   37.10    6.30
   3  -6   3   28.70    4.70
  -3   6  -3   28.50    4.40
   3   6   3   32.10    3.50
   3   6   3   29.40    4.00
   3   6   3   29.30    3.30
   3   6   3   34.40    3.40
  -3   6  -3   29.30    3.50
   4  -6   3  199.98   11.90
   4  -6   3  203.38   11.70
   4  -6   3  214.58   12.90
   4   6   3  192.98   11.20
   4   6   3  202.58   11.60
  -4   6  -3  194.78   11.10
   4   6   3  198.18   10.50
   4   6   3  184.38   13.40
  -4   6  -3  201.78   11.20
  -4   6  -3  205.08   11.00
   5  -6   3   80.59    6.20
   5  -6   3   87.19    6.10
   5  -6   3   72.89    6.10
  -5   6  -3   75.69    5.60
   5   6   3   83.49    5.90
   5   6   3   68.59    5.20
  -5   6  -3   75.29    5.70
   5   6   3   71.19    4.90
  -5   6  -3   76.59    5.40
   5   6   3   74.69    5.40
   6  -6   3  142.09    8.40
   6   6   3  148.89    7.70
  -6   6  -3  144.79    8.00
   6   6   3  153.28    8.40
   6   6   3  164.38    9.80
  -6   6  -3  156.78    8.90
   7  -6   3   94.29    5.40
  -7   6  -3   96.79    5.40
   7   6   3   78.19    5.50
   7   6   3   88.69    5.10
   7   6   3  101.89    5.20
  -7   6  -3  100.29    5.10
   7  -7  -3  273.47   12.80
  -7   7   3  263.47   12.20
  -7   7   3  270.37   12.40
  -6  -7   3   41.60    9.50
   6  -7  -3   52.09    3.90
  -6   7   3   55.79    3.70
  -6   7   3   58.09    4.20
  -6   7   3   49.70    4.30
  -6   7   3   59.69    4.10
   6   7  -3   50.49    4.00
   5  -7  -3   90.79    6.10
  -5   7   3   91.79    5.80
  -5   7   3   86.09    5.70
  -4  -7   3   25.30    8.80
   4  -7  -3   30.90    3.30
  -4   7   3   26.70    3.10
  -4   7   3   33.60    3.30
  -4   7   3   26.70    3.20
  -3  -7   3   12.60    7.00
  -3  -7   3   21.40    3.30
   3  -7  -3   27.40    3.20
  -3   7   3   31.70    4.20
  -3   7   3   25.40    3.80
  -3   7   3   18.30    2.80
  -2  -7   3   59.89   12.90
   2  -7  -3   66.39    5.40
  -2  -7   3   71.09    5.90
  -2  -7   3   70.79    4.90
  -2   7   3   78.29    5.20
  -2   7   3   72.09    5.20
  -2   7   3   76.79    5.40
   1  -7  -3  202.08   11.10
  -1  -7   3  207.78   10.70
  -1  -7   3  196.78   12.10
  -1  -7   3  197.58   12.10
  -1  -7   3  190.78   22.30
  -1   7   3  201.78   10.50
  -1   7   3  199.88   10.60
  -1   7   3  204.38   10.60
   0  -7   3  139.89    9.70
   0  -7   3  143.19    9.70
   0  -7   3  145.39    8.40
   0  -7  -3  125.59    8.00
   0   7   3  134.29    8.00
   0   7   3  130.89    7.80
   0   7   3  123.19    8.40
  -1  -7  -3   28.30    3.10
   1  -7   3   21.70    3.50
   1  -7   3   26.90    4.00
   1  -7   3   25.30    3.20
   1   7   3   26.20    3.60
   1   7   3   29.90    3.40
   1   7   3   23.90    3.30
   2  -7   3  131.99    9.60
  -2  -7  -3  154.78    8.60
   2  -7   3  153.68   10.20
   2  -7   3  161.98    9.30
   2   7   3  157.98    8.80
   2   7   3  165.38    8.80
  -2   7  -3  143.39    8.20
   2   7   3  169.28    8.70
   3  -7   3  180.98   11.30
   3  -7   3  192.38   10.40
   3  -7   3  179.38   10.80
   3   7   3  197.28   10.10
  -3   7  -3  186.08   10.10
  -3   7  -3  174.68    9.60
   3   7   3  211.48   10.20
   3   7   3  192.18    9.70
   4  -7   3  361.66   18.50
   4  -7   3  385.06   17.80
   4  -7   3  378.16   17.80
   4   7   3  381.76   17.10
  -4   7  -3  376.36   17.40
   4   7   3  432.26   17.70
  -4   7  -3  348.67   17.10
  -4   7  -3  380.96   17.20
   4   7   3  393.16   17.50
   5  -7   3   43.60    3.60
  -5   7  -3   45.80    3.10
  -5   7  -3   34.90    4.40
   5   7   3   40.70    2.90
   5  -8  -3   46.00    3.60
  -5   8   3   48.50    3.00
  -5   8   3   43.10    3.50
   4  -8  -3  161.38    8.10
  -4   8   3  157.78    8.00
  -4   8   3  151.08    7.70
   3  -8  -3   64.19    4.40
  -3   8   3   62.99    4.40
  -3   8   3   58.89    4.80
  -3   8   3   60.89    4.50
   2  -8  -3  157.38    8.80
  -2   8   3  158.38    8.60
  -2   8   3  197.18   10.80
  -1  -8   3  213.28   10.90
   1  -8  -3  216.88   12.20
  -1   8   3  207.38   10.50
   0  -8   3   98.59    7.00
   0  -8   3  107.19    7.20
   0  -8   3  117.69    6.90
   0  -8  -3  103.59    6.10
   0   8   3  109.19    6.20
   0   8   3   94.29    6.00
   0   8   3   92.29    6.40
   1  -8   3  342.77   16.70
  -1  -8  -3  334.47   15.50
   1  -8   3  391.36   17.40
   1   8   3  337.77   15.50
   1   8   3  318.67   15.20
   2  -8   3   36.00    3.20
   2  -8   3   34.10    2.80
   2  -8   3   39.50    3.30
   2   8   3   32.40    2.70
   2   8   3   31.00    3.00
   3  -8   3  218.88   10.00
   3   8   3  217.58   10.20
  12   0  -4  220.78   11.20
  12   0  -4  188.08   10.50
 -12   0   4  186.08   10.00
 -11   0   4    6.10    5.40
  11   0  -4   11.70    2.60
 -11   0   4   10.80    2.40
  11   0  -4    6.90    1.60
 -10   0   4    2.20    4.90
  10   0  -4    2.90    1.30
  10   0  -4   -5.20    4.10
  10   0  -4    3.30    1.20
 -10   0   4    2.60    1.30
  10   0  -4    4.00    2.10
  -9   0   4   23.30    3.30
   9   0  -4   29.30    3.00
   9   0  -4   23.10    3.30
   9   0  -4   26.50    4.10
  -9   0   4   29.40   10.20
  -9   0   4   23.10    3.70
   9   0  -4   25.50    3.40
   9   0  -4   22.40    4.20
   8   0  -4   36.90    3.80
  -8   0   4   51.79    6.50
   8   0  -4   44.60    3.90
   8   0  -4   32.40    4.50
   8   0  -4   34.30    5.30
   8   0  -4   36.20    3.60
  -8   0   4   49.70   10.40
  -8   0   4   44.80    5.70
  -7   0   4   20.90    3.30
  -7   0   4   24.10    5.60
   7   0  -4   17.60    2.50
   7   0  -4   18.70    3.70
  -7   0   4   21.60    7.40
   7   0  -4   18.60    2.50
   7   0  -4   21.40    2.70
   6   0  -4 3320.27  128.79
  -6   0   4 3441.26  139.99
  -6   0   4 3467.45  129.29
   6   0  -4 2764.12  131.69
   6   0  -4 3058.59  129.09
   6   0  -4 3207.98  128.89
  -5   0   4    3.90    1.40
  -5   0   4    4.60    1.70
  -5   0   4    0.80    2.20
   5   0  -4    0.60    0.70
   5   0  -4    1.50    0.90
   4   0  -4 7366.76  318.57
  -4   0   4 8155.38  319.27
  -4   0   4 8581.44  319.57
  -3   0   4 5177.68  197.68
  -3   0   4 4897.81  196.98
  -3   0   4 4934.91  198.18
   3   0  -4 4855.91  197.28
   1   0  -4 7632.64  309.47
   0   0  -4 8979.30  363.76
   1   0   4 4239.58  165.28
  -1   0  -4 3998.40  164.58
  -2   0  -4    0.80    1.40
   2   0   4    1.10    1.10
  -2   0  -4    1.90    3.00
   2   0   4    6.20    1.80
   3   0   4 7881.71  292.57
   3   0   4 7249.97  289.87
  -3   0  -4 7388.06  290.97
  -3   0  -4 6698.03  304.07
  -3   0  -4 7256.17  291.17
   4   0   4  327.37   17.20
   4   0   4  318.97   17.80
  -4   0  -4  328.77   15.90
  -4   0  -4  328.57   15.80
  -4   0  -4  301.27   16.80
  -4   0  -4  314.47   27.10
   4   0   4  304.37   14.70
  -4   0  -4  325.07   15.90
   4   0   4  311.97   16.10
   4   0   4  328.57   14.40
   5   0   4  835.82   40.00
   5   0   4  870.31   40.60
  -5   0  -4  852.51   37.60
  -5   0  -4  875.51   37.70
  -5   0  -4  859.01   37.50
  -5   0  -4  860.51   39.60
   5   0   4  867.81   38.30
   5   0   4  869.61   35.50
  -6   0  -4  169.88    9.40
  -6   0  -4  166.78   11.10
   6   0   4  167.58   12.00
   6   0   4  156.18   12.30
  -6   0  -4  169.88    9.80
  -7   0  -4  151.88    7.90
  -7   0  -4  157.48   11.30
   7   0   4  152.58   11.10
  -7   0  -4  162.28   10.50
  -8   0  -4  276.47   15.40
  -8   0  -4  278.77   14.50
   8   0   4  266.37   14.50
   8   0   4  284.47   15.90
  -9   0  -4  131.09    8.90
  -9   0  -4  135.59    7.50
  12  -1  -4   49.10    4.10
 -12  -1   4   51.69    3.70
 -12   1   4   49.70    3.90
  12   1  -4   45.80    3.40
 -11  -1   4   32.60    8.50
  11  -1  -4   40.40    4.50
 -11  -1   4   42.00    4.00
  11  -1  -4   45.80    5.50
  11   1  -4   42.00    3.80
  11   1  -4   36.80    5.30
 -11   1   4   40.30    3.30
  11   1  -4   42.60    3.00
 -10  -1   4   68.59   14.20
 -10  -1   4   69.59    5.90
  10  -1  -4   71.19    6.40
  10  -1  -4   73.09    5.60
  10   1  -4   69.79    5.70
 -10   1   4   62.99    5.20
  10   1  -4   66.59    7.20
  10   1  -4   82.49    5.00
  10   1  -4   66.29    5.40
 -10   1   4   70.29    6.10
  10   1  -4   65.49    5.60
  -9  -1   4 2648.73  105.99
   9  -1  -4 2559.64  102.79
  -9  -1   4 2686.33  119.79
   9  -1  -4 2608.24  104.89
  -9  -1   4 2199.98  102.99
   9  -1  -4 2579.54  107.19
   9   1  -4 2662.03  105.39
   9   1  -4 2621.64  103.69
  -9   1   4 2608.34  106.39
  -9   1   4 2575.64  104.89
   9   1  -4 2516.05  103.59
   9   1  -4 2461.05  106.99
   9   1  -4 2449.05  103.59
   8  -1  -4  711.43   35.40
  -8  -1   4  700.23   31.10
   8  -1  -4  717.93   31.00
   8  -1  -4  802.52   34.30
   8  -1  -4  687.53   32.00
  -8  -1   4  721.23   33.10
  -8   1   4  689.63   45.60
   8   1  -4  741.43   32.60
  -8   1   4  710.63   32.30
  -8   1   4  693.33   30.40
  -8   1   4  697.93   33.60
   8   1  -4  668.73   34.10
   8   1  -4  702.83   31.00
   8   1  -4  738.13   31.10
   8   1  -4  748.23   31.00
   7  -1  -4  348.47   18.80
   7  -1  -4  366.96   16.40
  -7  -1   4  365.06   25.00
   7  -1  -4  346.47   16.20
  -7  -1   4  359.56   18.00
   7  -1  -4  351.96   16.40
   7  -1  -4  306.37   16.90
   7   1  -4  352.06   17.10
  -7   1   4  368.46   17.60
   7   1  -4  344.57   17.40
  -7   1   4  344.47   18.10
  -7   1   4  379.86   27.60
  -7   1   4  361.16   16.00
  -7   1   4  349.87   17.80
   7   1  -4  347.97   16.20
   7   1  -4  339.17   16.30
  -7   1   4  351.76   16.00
  -7   1   4  340.27   16.20
   6  -1  -4 1310.97   54.39
   6  -1  -4 1306.57   54.59
   6  -1  -4 1288.57   54.39
  -6  -1   4 1418.66   63.69
   6  -1  -4 1236.08   55.29
  -6  -1   4 1288.37   55.89
  -6  -1   4 1345.77   58.39
   6   1  -4 1369.26   54.19
  -6   1   4 1248.48   54.19
  -6   1   4 1298.67   54.29
  -6   1   4 1378.76   54.49
  -6   1   4 1274.47   55.49
  -6   1   4 1424.46   56.19
  -6   1   4 1295.17   64.79
   6   1  -4 1365.46   54.49
   5  -1  -4 8844.71  347.07
   5  -1  -4 8447.25  346.87
  -5  -1   4 8835.52  350.16
  -5   1   4 9212.58  348.57
  -5   1   4 8500.85  346.77
   5   1  -4 8611.44  346.77
  -5   1   4 8695.63  346.87
  -5   1   4 8766.82  356.46
   4  -1  -4 1611.64   66.99
  -4  -1   4 1730.53   66.69
  -4  -1   4 1637.14   68.99
   4  -1  -4 1645.14   66.79
  -4  -1   4 1689.13   72.19
  -4   1   4 1790.42   68.09
  -4   1   4 1627.64   66.59
   4   1  -4 1651.83   66.29
  -4   1   4 1472.65   66.49
  -4   1   4 1624.14   73.79
  -3  -1   4 2188.88   86.29
  -3  -1   4 2076.79   85.09
   3  -1  -4 2037.50   84.39
  -3  -1   4 2075.09   84.69
  -3   1   4 2134.19   84.19
  -3   1   4 2124.69   85.39
   3   1  -4 2072.99   83.79
  -3   1   4 2067.89   90.59
   2  -1  -4  188.18    8.70
  -2  -1   4  177.28    9.20
  -2  -1   4  191.08    9.40
  -2  -1   4  165.18    8.50
  -2   1   4  163.98    8.50
  -2   1   4  149.79    7.60
  -2   1   4  145.99   11.60
  -2   1   4  149.69    8.50
   2   1  -4  148.89    7.40
   1  -1  -4   12.40    3.50
  -1  -1   4   18.20    3.00
  -1   1   4   11.10    1.50
   1   1  -4   16.80    1.60
  -1   1   4   11.50    1.90
  -1   1   4   11.60    1.80
   0  -1  -4   12.00    2.00
   0  -1  -4    7.50    3.00
   0  -1   4    9.20    1.40
   0   1  -4   13.30    4.20
   0   1   4    6.20    1.70
   0   1  -4    5.60    1.10
   0   1   4   10.50    1.40
  -1  -1  -4 1585.34   68.39
  -1  -1  -4 1598.94   76.59
   1  -1   4 1736.73   68.89
   1   1   4 1739.33   68.49
   1   1   4 1774.72   69.39
  -1   1  -4 1702.73   68.29
   1   1   4 1618.64   69.59
   1   1   4 1684.93   68.09
   2  -1   4  935.31   39.30
  -2  -1  -4  901.31   38.50
  -2  -1  -4  935.81   38.50
  -2  -1  -4  926.31   48.40
  -2   1  -4  910.91   38.70
   2   1   4  898.51   38.00
  -2   1  -4  917.11   38.40
   2   1   4  864.31   37.90
  -2   1  -4  789.32   47.80
   2   1   4 1028.70   39.90
   3  -1   4  323.37   17.40
  -3  -1  -4  337.17   21.40
  -3  -1  -4  304.77   15.20
   3  -1   4  292.37   16.60
  -3  -1  -4  318.37   24.70
  -3   1  -4  315.87   15.60
   3   1   4  353.46   17.50
   3   1   4  293.07   15.90
  -3   1  -4  316.07   15.30
   3   1   4  318.17   16.40
   3   1   4  327.17   14.80
  -4  -1  -4  415.66   19.50
   4  -1   4  436.76   21.90
  -4  -1  -4  408.26   31.90
   4  -1   4  426.16   21.80
  -4  -1  -4  405.66   19.30
  -4  -1  -4  401.16   20.90
  -4  -1  -4  406.46   19.50
   4   1   4  429.66   18.80
   4   1   4  415.56   21.10
  -4   1  -4  414.96   19.80
   4   1   4  433.86   20.60
  -4   1  -4  419.16   21.20
   4   1   4  410.16   22.30
   4   1   4  420.36   19.00
  -4   1  -4  426.26   20.10
   4   1   4  417.46   19.00
  -4   1  -4  421.96   20.00
   5  -1   4   21.90    3.40
   5  -1   4   24.00    5.40
   5  -1   4   13.60    2.60
  -5  -1  -4   20.10    2.70
   5  -1   4   18.80    5.70
  -5  -1  -4   26.80    9.60
   5   1   4   15.20    3.50
   5   1   4   23.50    2.50
   5   1   4   16.40    2.70
  -5   1  -4   16.60    3.10
  -5   1  -4   17.30    3.10
   5   1   4   28.60    3.90
   6  -1   4  978.20   44.90
   6  -1   4 1023.80   41.90
   6  -1   4  949.80   48.70
  -6  -1  -4  993.40   43.70
  -6  -1  -4  853.91   59.69
   6  -1   4  922.91   42.50
   6   1   4  956.10   45.40
  -6   1  -4  974.90   42.40
   6   1   4  953.10   45.20
  -6   1  -4  985.30   42.10
  -6   1  -4 1003.80   44.30
   6   1   4  992.30   43.10
  -6   1  -4  991.60   42.40
   7  -1   4  299.37   16.90
  -7  -1  -4  285.57   15.40
   7  -1   4  269.07   13.60
  -7   1  -4  299.97   14.50
  -7   1  -4  288.97   17.20
  -7   1  -4  290.47   14.10
   7   1   4  273.97   15.10
  -7   1  -4  290.27   16.10
   7   1   4  279.97   16.90
  -7   1  -4  277.27   16.70
  -8  -1  -4  325.27   17.40
   8  -1   4  331.07   17.30
  -8  -1  -4  319.87   17.90
  -8   1  -4  320.97   13.90
   8   1   4  310.27   17.40
  -8   1  -4  326.27   16.60
  -8   1  -4  326.77   17.30
   8   1   4  322.87   15.60
  -9  -1  -4    0.60    1.10
   9  -1   4    3.40    1.60
   9   1   4    1.40    0.80
   9   1   4    0.80    1.10
  -9   1  -4    1.60    1.80
  -9   1  -4    5.10    1.50
 -12  -2   4  212.48    9.70
  12  -2  -4  221.48   10.90
  12   2  -4  217.28   10.30
 -12   2   4  220.08   10.80
  11  -2  -4  166.98    9.70
 -11  -2   4  156.78    8.70
  11   2  -4  155.18    8.00
 -11   2   4  148.89    9.10
  11   2  -4  153.48    7.70
  11   2  -4  158.38    8.80
 -11   2   4  150.48    8.30
 -10  -2   4  361.16   35.30
  10  -2  -4  348.07   16.90
  10  -2  -4  354.06   18.80
 -10  -2   4  333.17   17.40
  10   2  -4  377.86   17.10
  10   2  -4  359.06   16.40
  10   2  -4  349.77   17.40
 -10   2   4  350.16   18.20
 -10   2   4  343.47   17.20
  10   2  -4  349.77   16.50
  -9  -2   4  141.79   22.80
  -9  -2   4  144.89    9.30
   9  -2  -4  140.89    8.90
   9  -2  -4  132.89   10.00
  -9  -2   4  154.68   16.30
   9   2  -4  141.99    8.20
   9   2  -4  145.09    8.20
  -9   2   4  146.79    9.20
  -9   2   4  146.89    7.70
   9   2  -4  138.89    8.20
  -9   2   4  138.19    9.90
  -9   2   4  147.59    8.10
   9   2  -4  147.19    9.40
  -8  -2   4  256.97   20.50
  -8  -2   4  315.27   16.10
   8  -2  -4  294.77   15.50
  -8  -2   4  307.57   34.40
   8  -2  -4  308.57   17.20
  -8  -2   4  336.07   24.10
  -8   2   4  295.97   14.30
   8   2  -4  298.07   14.40
   8   2  -4  294.37   14.60
  -8   2   4  302.07   16.70
  -8   2   4  300.77   14.50
  -8   2   4  308.27   16.00
   8   2  -4  298.57   15.80
  -8   2   4  299.87   14.80
  -7  -2   4  595.34   48.20
   7  -2  -4  562.64   27.20
  -7  -2   4  544.45   30.50
   7  -2  -4  570.54   25.70
  -7  -2   4  590.44   33.10
  -7  -2   4  566.44   25.90
  -7   2   4  522.85   24.50
  -7   2   4  575.74   26.10
  -7   2   4  535.85   24.50
   7   2  -4  532.95   25.60
   7   2  -4  539.25   24.50
   7   2  -4  538.55   24.50
  -7   2   4  547.75   26.70
   7   2  -4  557.44   24.30
  -7   2   4  566.14   27.50
  -7   2   4  552.94   24.70
  -6  -2   4  513.25   27.10
  -6  -2   4  477.65   22.80
   6  -2  -4  506.15   24.30
  -6  -2   4  541.25   43.50
  -6   2   4  452.85   34.50
   6   2  -4  464.35   22.80
  -6   2   4  509.25   22.10
  -6   2   4  488.85   23.10
  -6   2   4  502.15   22.10
  -6   2   4  468.45   28.00
   6   2  -4  464.65   21.90
  -6   2   4  519.05   24.50
   6   2  -4  528.75   21.70
   6   2  -4  474.55   22.40
  -6   2   4  515.15   22.20
  -5  -2   4 2716.03  117.49
  -5  -2   4 2837.82  118.99
  -5   2   4 2787.22  123.89
  -5   2   4 3065.29  115.69
   5   2  -4 2890.71  112.59
   5   2  -4 2661.23  112.69
  -5   2   4 2853.71  113.09
  -5   2   4 2648.33  112.99
  -4  -2   4 2243.38   93.59
  -4  -2   4 2232.58   90.39
  -4  -2   4 2187.78   92.89
  -4   2   4 2157.48   97.99
  -4   2   4 2204.88   90.99
   4   2  -4 2072.29   88.89
  -4   2   4 2198.28   89.19
  -4   2   4 2376.66   89.19
  -3  -2   4 1177.68   49.80
  -3  -2   4 1008.80   51.09
  -3  -2   4 1194.58   49.70
  -3   2   4 1197.68   48.10
  -3   2   4 1079.29   46.20
   3   2  -4 1151.18   47.30
  -3   2   4 1149.69   46.20
  -3   2   4 1075.09   55.69
   3   2  -4 1126.89   45.60
  -2  -2   4 6880.51  260.47
  -2  -2   4 6605.84  260.27
  -2   2   4 6148.08  257.07
  -2   2   4 6429.76  258.67
   2   2  -4 6309.27  256.37
  -1  -2   4 8172.28  313.17
  -1  -2   4 8246.47  312.37
   1  -2  -4 7743.03  310.47
   1   2  -4 7489.55  308.57
  -1   2   4 7324.77  309.27
   0  -2  -4 5420.06  247.58
   0  -2   4 6156.88  240.58
   0   2   4 5781.32  236.28
   0   2   4 6348.27  238.08
   0   2  -4 5742.73  235.88
   0   2   4 6170.78  237.98
   0   2   4 5964.00  236.18
  -1  -2  -4  124.69   12.20
   1  -2   4  111.99    9.10
   1   2   4  119.19    7.70
   1   2   4  120.69    6.40
   1   2   4  119.39    7.60
   1   2   4  115.59    6.50
   2  -2   4 6009.00  251.37
  -2  -2  -4 6378.66  258.97
   2  -2   4 5944.81  247.88
  -2   2  -4 6223.98  246.78
   2   2   4 6163.68  246.18
  -2   2  -4 6310.07  246.48
   2   2   4 5755.82  247.88
   2   2   4 6465.15  246.28
   2   2   4 6364.56  248.18
   3  -2   4 1488.65   64.99
  -3  -2  -4 1459.45   75.49
   3  -2   4 1636.64   95.39
   3  -2   4 1555.04   68.59
   3  -2   4 1419.16   64.49
   3  -2   4 1443.66   68.69
  -3  -2  -4 1478.25   64.19
  -3   2  -4 1536.35   67.89
   3   2   4 1497.85   65.49
  -3   2  -4 1442.76   65.79
   3   2   4 1664.63   62.89
   3   2   4 1605.34   64.99
  -3   2  -4 1547.75   63.19
   3   2   4 1498.65   63.19
   4  -2   4  667.03   35.70
   4  -2   4  642.04   31.40
   4  -2   4  703.93   31.80
  -4  -2  -4  672.83   42.80
   4  -2   4  639.84   31.10
  -4  -2  -4  650.13   30.70
   4   2   4  634.04   28.80
  -4   2  -4  664.13   30.10
   4   2   4  726.53   29.90
  -4   2  -4  678.53   30.20
   4   2   4  678.23   31.60
   4   2   4  660.03   30.70
   4   2   4  668.63   29.20
  -4   2  -4  653.13   31.30
  -4   2  -4  678.03   30.00
   4   2   4  660.73   32.90
  -5  -2  -4 1087.49   48.50
   5  -2   4 1052.19   49.00
  -5  -2  -4 1078.79   64.09
   5  -2   4 1116.99   54.79
   5  -2   4 1165.58   52.49
   5  -2   4 1118.09   49.80
  -5   2  -4 1149.48   48.20
   5   2   4 1161.08   48.90
   5   2   4 1144.69   46.50
  -5   2  -4 1102.09   48.00
   5   2   4 1093.99   46.90
  -5   2  -4 1132.79   48.30
   5   2   4 1094.09   49.90
  -5   2  -4 1122.69   49.60
   5   2   4  990.60   56.69
   5   2   4 1127.39   46.90
   6  -2   4  420.06   29.10
  -6  -2  -4  430.76   37.10
  -6  -2  -4  485.85   22.90
   6  -2   4  468.85   24.20
   6  -2   4  433.96   22.50
   6   2   4  470.05   25.40
  -6   2  -4  484.05   24.20
   6   2   4  480.25   21.10
  -6   2  -4  475.65   22.40
   6   2   4  448.86   25.10
   6   2   4  499.45   21.10
   6   2   4  494.05   23.40
  -6   2  -4  479.45   22.70
   7  -2   4  131.39    9.50
  -7  -2  -4  129.49    7.80
  -7   2  -4  123.39    9.00
  -7   2  -4  121.79    7.70
  -7   2  -4  129.19    8.50
  -7   2  -4  124.89    8.70
   7   2   4  125.69    9.80
  -8  -2  -4    1.40    1.30
   8  -2   4    0.90    1.00
  -8   2  -4    0.80    1.10
  -8   2  -4    3.60    2.20
   8   2   4    3.20    1.10
   8   2   4    3.50    2.10
  -8   2  -4    1.50    1.00
   9  -2   4    5.40    1.10
   9  -2   4    3.50    1.00
  -9  -2  -4    7.90    1.70
   9   2   4    5.10    1.00
  -9   2  -4    7.20    1.60
  11  -3  -4  405.16   18.70
 -11  -3   4  353.76   29.40
 -11  -3   4  385.16   17.00
 -11   3   4  406.06   17.70
  11   3  -4  411.66   17.00
  11   3  -4  386.16   17.90
  11   3  -4  381.66   17.10
 -11   3   4  393.96   18.80
  10  -3  -4  867.01   38.50
 -10  -3   4  905.31   36.80
  10   3  -4  878.11   36.40
 -10   3   4  836.02   37.20
  10   3  -4  839.92   37.20
 -10   3   4  852.21   35.80
  10   3  -4  883.61   36.40
  10   3  -4  814.82   36.30
 -10   3   4  847.12   38.20
  -9  -3   4  507.45   32.60
  -9  -3   4  638.94   27.40
   9  -3  -4  597.74   29.10
   9   3  -4  629.04   27.90
  -9   3   4  625.44   26.40
   9   3  -4  622.84   26.70
  -9   3   4  619.64   26.20
  -9   3   4  563.24   27.50
  -9   3   4  595.14   28.70
   9   3  -4  644.44   26.60
   9   3  -4  606.04   26.60
  -9   3   4  546.95   28.50
   8  -3  -4 1389.36   56.79
  -8  -3   4 1422.06   57.09
  -8  -3   4 1352.26   64.29
  -8  -3   4 1460.25   89.79
   8  -3  -4 1365.56   59.09
  -8  -3   4 1157.48   64.29
  -8   3   4 1373.46   56.29
  -8   3   4 1356.66   57.69
   8   3  -4 1329.37   56.19
  -8   3   4 1438.36   56.59
   8   3  -4 1354.16   57.49
   8   3  -4 1321.67   56.09
  -8   3   4 1357.66   56.09
   8   3  -4 1375.16   55.99
  -8   3   4 1146.89   57.89
  -7  -3   4  102.09    6.80
  -7  -3   4  117.49   20.70
  -7  -3   4  109.89   11.10
   7  -3  -4  107.39    8.30
  -7  -3   4  108.89   15.10
   7  -3  -4   99.39    7.10
   7  -3  -4   94.79    7.30
  -7   3   4  103.09    6.70
  -7   3   4  102.99    6.80
   7   3  -4  106.49    6.30
   7   3  -4   95.89    6.30
  -7   3   4  104.79    8.40
  -7   3   4   98.19   10.10
   7   3  -4  100.39    8.20
  -7   3   4  103.69    7.40
  -7   3   4   97.49    6.50
  -6  -3   4  573.24   30.10
   6  -3  -4  576.14   27.30
   6  -3  -4  591.84   26.10
  -6  -3   4  617.94   49.40
  -6  -3   4  544.35   25.20
  -6  -3   4  571.04   31.50
  -6   3   4  557.54   25.20
   6   3  -4  536.25   24.70
  -6   3   4  548.35   26.10
  -6   3   4  567.84   28.50
  -6   3   4  572.84   25.30
   6   3  -4  557.24   24.50
  -6   3   4  556.14   25.30
  -5  -3   4 1556.04   87.19
   5  -3  -4 1443.96   62.39
  -5  -3   4 1367.86   60.19
  -5  -3   4 1507.75   66.59
  -5   3   4 1555.94   63.99
   5   3  -4 1412.16   59.89
  -5   3   4 1476.45   60.59
  -5   3   4 1352.46   60.89
  -5   3   4 1527.15   60.59
   5   3  -4 1469.35   59.69
   4  -3  -4 1217.38   55.69
  -4  -3   4 1372.86   57.09
  -4  -3   4 1478.95   78.59
  -4  -3   4 1198.78   61.59
   4   3  -4 1311.67   53.19
  -4   3   4 1316.67   54.19
  -4   3   4 1361.66   56.89
  -4   3   4 1355.26   53.99
   4   3  -4 1193.78   53.39
  -3  -3   4  187.58   12.80
  -3  -3   4  204.18   12.50
   3   3  -4  192.48    8.70
  -3   3   4  197.48    9.60
  -3   3   4  195.58    9.50
  -3   3   4  194.28   14.00
  -2  -3   4 2104.19   85.69
   2  -3  -4 1929.11   88.89
  -2  -3   4 2001.40   84.99
  -2   3   4 2090.89   83.09
  -2   3   4 2075.79   80.79
  -2   3   4 1915.01   80.69
   2   3  -4 1880.71   79.59
  -1  -3   4   51.49    6.00
   1  -3  -4   45.50    6.70
  -1  -3   4   44.40    5.10
   1  -3  -4   44.10    4.20
  -1   3   4   55.89    3.50
  -1   3   4   51.49    4.60
  -1   3   4   49.50    3.50
   1   3  -4   42.40    2.60
  -1   3   4   48.70    4.60
   0  -3  -4  980.60   42.30
   0  -3  -4  950.20   47.60
   0  -3   4  933.51   44.20
   0   3   4  902.41   38.90
   0   3   4  892.31   40.80
   0   3   4  943.81   40.70
   0   3  -4  883.81   38.10
   0   3   4  986.10   38.90
  -1  -3  -4  604.54   29.80
  -1  -3  -4  583.34   34.10
   1  -3   4  587.64   30.90
   1   3   4  584.54   25.10
  -1   3  -4  558.84   24.80
   1   3   4  644.54   27.60
   1   3   4  559.74   25.20
  -1   3  -4  519.65   25.10
   1   3   4  588.44   27.00
   2  -3   4 1017.80   50.19
   2  -3   4  870.51   44.10
   2  -3   4  851.01   38.80
  -2  -3  -4  900.31   49.00
  -2  -3  -4  916.21   44.10
  -2   3  -4  841.22   38.10
   2   3   4  917.91   39.90
   2   3   4  833.72   39.20
   2   3   4  922.71   38.00
  -2   3  -4  904.21   37.90
   2   3   4  954.20   38.00
   2   3   4  854.91   37.80
   2   3   4  857.71   39.80
   3  -3   4  397.76   34.60
   3  -3   4  335.97   17.80
   3  -3   4  338.97   18.70
   3  -3   4  325.07   19.00
  -3  -3  -4  389.76   19.20
  -3  -3  -4  340.57   26.80
   3   3   4  348.97   16.50
  -3   3  -4  350.26   17.00
   3   3   4  368.66   16.80
   3   3   4  346.67   18.00
  -3   3  -4  332.17   17.20
   3   3   4  349.96   16.60
   4  -3   4  373.76   21.80
  -4  -3  -4  395.06   19.90
   4  -3   4  404.66   27.80
   4  -3   4  415.06   22.90
  -4   3  -4  416.16   20.00
  -4   3  -4  398.46   21.20
  -4   3  -4  399.86   20.10
   4   3   4  432.96   19.50
  -4   3  -4  411.66   20.20
   4   3   4  429.66   19.70
   4   3   4  435.76   19.70
   4   3   4  432.16   22.20
   5  -3   4  175.28   11.80
  -5  -3  -4  192.58   20.80
   5  -3   4  203.98   12.30
   5  -3   4  202.18   12.30
  -5  -3  -4  200.68   18.80
   5  -3   4  178.78   17.20
  -5   3  -4  187.48   11.30
   5   3   4  181.18   12.90
  -5   3  -4  192.48   12.30
  -5   3  -4  178.48   11.10
   5   3   4  236.08   18.50
   5   3   4  201.58   10.80
   5   3   4  196.88   10.30
  -5   3  -4  209.08   11.80
   5   3   4  195.88   10.70
   6  -3   4  751.52   36.70
   6  -3   4  941.31   40.60
  -6  -3  -4  969.10   59.79
   6  -3   4  721.33   36.70
   6   3   4  887.81   38.40
   6   3   4  879.41   40.00
   6   3   4  759.12   39.30
  -6   3  -4  910.61   40.80
  -6   3  -4  808.82   37.10
   6   3   4  813.72   35.90
  -6   3  -4  840.62   37.10
   6   3   4  821.32   35.70
  -6   3  -4  798.82   38.60
   7  -3   4  272.87   14.30
   7  -3   4  266.17   14.20
  -7  -3  -4  267.77   15.00
  -7   3  -4  262.27   13.60
   7   3   4  265.07   14.20
   7   3   4  237.18   15.20
  -7   3  -4  263.77   14.70
   7   3   4  239.28   12.80
   7   3   4  270.17   12.30
  -7   3  -4  275.97   14.70
   7   3   4  262.77   12.30
  -7   3  -4  263.57   13.30
   8  -3   4   20.20    2.50
   8  -3   4   19.60    2.40
  -8  -3  -4   16.10    2.50
  -8   3  -4   18.10    2.70
  -8   3  -4   22.20    2.10
  -8   3  -4   16.90    2.60
 -11  -4   4  151.38   15.50
  11  -4  -4  189.28    9.00
  11   4  -4  190.38    8.70
 -11   4   4  182.08    8.80
  11   4  -4  191.28    8.40
  10  -4  -4  169.68    9.80
 -10  -4   4  155.88   19.70
 -10   4   4  175.18    8.10
  10   4  -4  179.58    8.80
  10   4  -4  171.68    9.00
 -10   4   4  172.28    9.30
  10   4  -4  164.78    8.80
  10   4  -4  174.18    8.70
   9  -4  -4  110.99    7.90
  -9  -4   4   87.59   16.70
  -9  -4   4  104.09    6.60
   9   4  -4  103.09    6.30
  -9   4   4  106.09    7.10
   9   4  -4  104.39    6.40
  -9   4   4  111.79    6.20
   9   4  -4  114.99    7.00
  -9   4   4  104.59    6.40
  -9   4   4  104.39    7.00
   9   4  -4  105.79    6.40
   8  -4  -4   40.30    4.20
  -8  -4   4   52.49    3.70
  -8  -4   4   52.79   16.70
   8  -4  -4   44.60    5.90
   8   4  -4   47.70    3.90
   8   4  -4   57.69    4.70
  -8   4   4   46.70    4.20
   8   4  -4   44.90    3.90
  -8   4   4   43.90    4.50
   8   4  -4   45.00    4.00
  -8   4   4   52.39    5.20
   7  -4  -4  221.98   13.00
  -7  -4   4  214.08   10.30
   7  -4  -4  195.78   11.10
  -7  -4   4  177.08   17.60
  -7  -4   4  246.68   30.80
  -7   4   4  209.98   11.10
   7   4  -4  198.28   10.80
   7   4  -4  210.78   10.60
  -7   4   4  207.28   11.30
   7   4  -4  206.38   11.60
  -7   4   4  218.98   11.40
  -7   4   4  210.08   12.00
   7   4  -4  198.08   10.70
  -6  -4   4  180.88   25.10
   6  -4  -4  146.69   10.20
  -6  -4   4  128.09   13.90
  -6  -4   4  149.09    8.00
   6   4  -4  160.78    8.70
  -6   4   4  169.58    9.30
  -6   4   4  172.38   10.00
  -6   4   4  163.98    9.00
   6   4  -4  156.38    8.40
   5  -4  -4 1826.22   75.89
  -5  -4   4 1831.82   78.49
  -5  -4   4 1996.00  106.29
  -5  -4   4 1726.63   82.59
   5  -4  -4 1825.62   77.29
  -5   4   4 1991.20   80.09
  -5   4   4 1746.53   76.09
  -5   4   4 1859.21   75.29
   5   4  -4 1767.42   74.49
  -5   4   4 1776.62   75.29
  -5   4   4 1820.92   75.29
   5   4  -4 1823.42   74.29
  -4  -4   4   15.10    4.50
  -4  -4   4    6.10    5.70
  -4  -4   4    7.70    3.50
   4  -4  -4    6.90    2.10
  -4   4   4    7.20    3.50
  -4   4   4    6.80    1.70
   4   4  -4    5.20    1.10
  -4   4   4    8.20    1.90
  -4   4   4    3.80    1.30
  -3  -4   4  136.29   11.40
  -3  -4   4  143.49   20.80
   3  -4  -4  120.59    8.20
   3  -4  -4  104.49   13.40
  -3  -4   4  115.99    8.60
   3  -4  -4  120.79    8.40
  -3  -4   4  127.29   10.80
  -3  -4   4  118.39    9.60
  -3   4   4  123.29    7.80
  -3   4   4  127.99    6.90
  -3   4   4  112.89    6.90
  -3   4   4  129.59    9.30
   3   4  -4  118.09    5.90
  -3   4   4  118.29    6.90
   2  -4  -4 1605.04   72.29
   2  -4  -4 1471.45   62.79
   2  -4  -4 1482.15   69.89
  -2  -4   4 1497.25   64.79
  -2  -4   4 1498.85   65.99
  -2  -4   4 1535.25   67.69
  -2  -4   4 1621.44   68.69
  -2  -4   4 1418.86  114.59
  -2   4   4 1652.23   66.59
  -2   4   4 1452.75   65.39
  -2   4   4 1536.95   62.09
  -2   4   4 1487.25   61.89
   2   4  -4 1430.96   60.49
  -1  -4   4 7245.88  277.57
  -1  -4   4 6273.27  272.07
   1  -4  -4 7096.49  278.17
   1  -4  -4 6323.57  267.87
   1  -4  -4 6594.54  270.27
  -1  -4   4 7007.50  275.17
  -1   4   4 6666.43  270.47
  -1   4   4 7049.79  269.97
  -1   4   4 6645.84  267.07
  -1   4   4 6494.55  266.87
   1   4  -4 6405.06  265.57
   0  -4   4  840.12   53.79
   0  -4   4  732.33   38.00
   0  -4  -4  716.83   31.40
   0  -4  -4  742.83   34.90
   0  -4   4  716.83   33.90
   0  -4   4  724.13   34.70
   0   4   4  750.12   33.50
   0   4   4  699.63   33.60
   0   4   4  697.93   31.80
   0   4   4  684.53   32.90
   0   4   4  682.83   31.60
   0   4   4  713.83   30.80
   0   4  -4  695.23   29.90
   1  -4   4   33.50    4.50
   1  -4   4   30.60    3.90
   1  -4   4   26.60    4.30
  -1  -4  -4   25.00    2.80
   1  -4   4   38.10    7.10
  -1  -4  -4   24.40    5.40
   1  -4   4   25.90    8.90
   1   4   4   24.60    3.10
   1   4   4   23.30    4.70
  -1   4  -4   27.40    2.80
   1   4   4   26.90    4.80
   1   4   4   27.40    4.20
  -1   4  -4   32.80    4.30
  -2  -4  -4 1475.45   68.89
   2  -4   4 1528.75   85.99
   2  -4   4 1404.06   60.79
   2  -4   4 1543.15   63.09
  -2  -4  -4 1514.35   73.69
   2  -4   4 1429.76   69.89
  -2  -4  -4 1545.05   61.59
   2  -4   4 1475.55   64.49
   2  -4   4 1450.85   65.09
  -2   4  -4 1336.97   61.49
   2   4   4 1439.66   61.39
   2   4   4 1402.06   63.79
  -2   4  -4 1477.85   61.39
   2   4   4 1611.84   64.79
   2   4   4 1485.45   61.59
   2   4   4 1563.34   61.59
   2   4   4 1498.65   63.19
   3  -4   4  823.52   38.50
   3  -4   4  785.92   43.90
   3  -4   4  886.11   37.50
  -3  -4  -4  739.73   54.89
  -3  -4  -4  824.92   47.40
   3  -4   4  889.91   39.30
   3  -4   4  834.92   35.70
   3  -4   4  868.81   57.29
  -3   4  -4  791.32   36.20
   3   4   4  828.92   38.60
   3   4   4  841.62   35.70
   3   4   4  795.72   35.40
  -3   4  -4  752.62   36.20
   3   4   4  845.72   35.80
  -3   4  -4  750.22   37.10
  -3   4  -4  859.81   36.00
  -4  -4  -4  509.65   32.30
   4  -4   4  496.35   23.20
   4  -4   4  494.15   24.40
   4  -4   4  446.66   30.70
   4  -4   4  482.85   25.40
   4  -4   4  487.75   25.10
  -4  -4  -4  506.05   34.50
  -4   4  -4  465.35   24.40
  -4   4  -4  479.35   23.60
   4   4   4  512.05   23.20
   4   4   4  493.55   25.80
  -4   4  -4  505.35   23.80
  -4   4  -4  516.25   23.60
   4   4   4  555.64   23.30
   4   4   4  497.55   22.70
   4   4   4  500.85   24.40
  -5  -4  -4  496.85   35.70
   5  -4   4  553.54   25.90
   5  -4   4  567.94   29.50
   5   4   4  493.55   26.40
  -5   4  -4  541.75   25.20
   5   4   4  521.85   23.70
  -5   4  -4  514.55   28.30
   5   4   4  532.75   24.20
  -5   4  -4  521.95   24.80
   6  -4   4  451.55   22.40
   6  -4   4  490.15   21.60
   6  -4   4  472.85   22.20
   6  -4   4  476.15   22.80
  -6   4  -4  398.46   24.50
   6   4   4  473.25   21.00
  -6   4  -4  469.35   22.10
   6   4   4  468.45   21.50
  -6   4  -4  473.15   23.10
  -6   4  -4  475.35   22.30
   6   4   4  514.75   23.10
   7  -4   4   17.20    2.90
   7  -4   4   19.20    2.10
   7   4   4   17.50    2.50
  -7   4  -4   18.70    3.20
  -7   4  -4   17.50    3.10
  -7   4  -4   11.30    2.60
   7   4   4   13.00    3.00
  -7   4  -4   15.10    2.60
  -8  -4  -4  122.99    6.70
   8  -4   4  112.39    6.40
   8   4   4  117.19    6.50
  -8   4  -4  112.29    5.80
  -8   4  -4  116.99    6.90
  10  -5  -4  477.65   21.30
 -10   5   4  502.05   21.10
  10   5  -4  557.14   22.90
  10   5  -4  531.85   21.90
 -10   5   4  507.55   22.40
   9  -5  -4  224.88   11.90
   9   5  -4  241.48   12.30
   9   5  -4  230.18   11.10
   9   5  -4  229.28   11.20
  -9   5   4  245.68   12.30
  -9   5   4  225.68   11.70
  -9   5   4  239.48   12.00
  -9   5   4  228.28   11.20
   9   5  -4  242.78   11.20
   8  -5  -4  399.36   20.00
   8   5  -4  422.26   18.50
  -8   5   4  396.16   18.60
  -8   5   4  444.56   20.10
   8   5  -4  408.06   18.60
   8   5  -4  403.16   19.40
  -8   5   4  404.46   19.70
   8   5  -4  401.36   18.60
  -8   5   4  426.26   19.00
  -7  -5   4  133.59   22.20
   7  -5  -4  144.29    9.30
   7  -5  -4  138.09    8.20
   7   5  -4  141.19    7.70
  -7   5   4  131.79    8.00
  -7   5   4  130.99    8.70
  -7   5   4  146.49    8.30
   7   5  -4  140.49    7.90
   7   5  -4  136.49    7.80
  -7   5   4  139.59    8.40
   6  -5  -4  842.72   36.30
   6  -5  -4  861.81   37.70
  -6  -5   4  755.92   44.00
  -6  -5   4  779.02   61.19
  -6   5   4  851.61   35.90
  -6   5   4  838.32   36.00
  -6   5   4  842.52   36.90
   6   5  -4  842.42   35.30
   5  -5  -4  318.67   24.20
   5  -5  -4  328.87   16.80
  -5  -5   4  298.47   22.70
  -5  -5   4  394.36   39.10
   5  -5  -4  353.36   17.90
  -5   5   4  330.47   16.30
  -5   5   4  356.16   16.50
   5   5  -4  338.77   15.20
  -5   5   4  327.57   17.00
  -5   5   4  355.16   16.40
   5   5  -4  312.97   16.70
  -4  -5   4  868.71   61.89
   4  -5  -4  768.02   34.80
  -4  -5   4  776.32   41.60
   4  -5  -4  816.32   43.40
   4  -5  -4  847.42   36.20
  -4  -5   4  742.23   39.80
  -4   5   4  793.12   34.10
   4   5  -4  761.32   32.70
  -4   5   4  761.52   34.00
  -4   5   4  771.32   34.00
  -3  -5   4   83.69    9.70
  -3  -5   4   83.69   11.90
  -3  -5   4   80.29   25.50
  -3  -5   4   84.59    7.20
  -3  -5   4   88.59    7.80
   3  -5  -4   87.19    6.60
   3  -5  -4   88.39    7.10
  -3   5   4   88.39    5.70
  -3   5   4   81.09    5.60
  -3   5   4   99.19    8.90
   3   5  -4   79.19    4.70
  -3   5   4   94.49    5.90
  -3   5   4   76.69    6.40
  -2  -5   4   53.79    7.80
   2  -5  -4   49.99    8.20
  -2  -5   4   58.29    6.50
   2  -5  -4   51.49    4.60
  -2  -5   4   75.99   15.80
  -2  -5   4   58.69    6.20
  -2  -5   4   58.99    8.60
  -2   5   4   54.49    4.30
  -2   5   4   57.89    6.70
  -2   5   4   58.59    5.40
  -2   5   4   58.39    4.50
  -2   5   4   65.19    4.70
  -2   5   4   55.19    6.90
  -1  -5   4 1827.62   76.39
  -1  -5   4 1916.91   82.59
  -1  -5   4 2032.20  105.59
  -1  -5   4 1825.32   79.99
   1  -5  -4 1836.82   76.39
  -1  -5   4 1766.12   84.19
   1  -5  -4 1807.52   84.09
  -1  -5   4 1897.11   79.29
  -1   5   4 1731.23   75.59
  -1   5   4 1722.93   77.29
  -1   5   4 1842.02   79.09
  -1   5   4 1852.41   75.69
  -1   5   4 1930.91   80.19
  -1   5   4 1884.51   75.59
   0  -5   4  148.29   13.70
   0  -5   4  138.79    8.70
   0  -5   4  127.49   17.50
   0  -5   4  156.18   21.90
   0   5  -4  127.09   12.00
   0   5   4  137.49   10.80
   0   5   4  137.79    9.30
   0   5   4  135.39    7.90
   0   5   4  142.59    8.10
   0   5   4  141.19    8.10
   0   5   4  127.59   12.60
   1  -5   4    2.50    5.30
  -1  -5  -4   -2.90    4.70
   1  -5   4    1.20    2.40
   1  -5   4    5.30    1.60
  -1  -5  -4    4.40    1.40
   1  -5   4    6.20    2.40
   1  -5   4    3.80    5.90
  -1   5  -4    3.70    1.60
   1   5   4    4.10    1.50
   1   5   4    0.80    1.90
   1   5   4    7.00    5.90
   1   5   4    2.40    3.10
   1   5   4    1.40    1.20
   2  -5   4   75.09    6.40
  -2  -5  -4   81.89    5.70
   2  -5   4   78.89    7.40
   2  -5   4   76.49    7.60
   2  -5   4   83.29   15.50
  -2  -5  -4   76.89   11.50
   2  -5   4   72.69   11.60
   2   5   4   72.19    6.60
   2   5   4   93.99    8.40
   2   5   4   81.19    5.90
  -2   5  -4   73.59    5.50
  -2   5  -4   64.79    6.20
   2   5   4   89.89    5.90
   2   5   4   71.69    5.50
   3  -5   4  739.23   35.70
   3  -5   4  786.42   34.60
   3  -5   4  856.21   37.10
  -3  -5  -4  696.13   48.50
  -3   5  -4  759.22   33.70
   3   5   4  634.34   39.00
   3   5   4  770.12   33.30
   3   5   4  789.72   33.30
  -3   5  -4  752.42   33.30
   3   5   4  785.72   34.70
  -3   5  -4  735.33   33.70
   3   5   4  723.33   32.80
   4  -5   4  150.28   11.00
   4  -5   4  139.69   10.10
   4  -5   4  146.39   10.00
  -4   5  -4  139.49    9.70
   4   5   4  140.99    8.30
  -4   5  -4  145.49    8.90
   4   5   4  142.39    9.50
   4   5   4  147.39    8.60
  -4   5  -4  146.99    9.00
  -4   5  -4  136.69    9.10
   4   5   4  142.79    8.70
   5  -5   4  135.29    9.10
   5  -5   4  149.09    9.70
   5  -5   4  145.09    9.10
   5   5   4  146.59    8.50
  -5   5  -4  134.69    8.60
   5   5   4  151.28    9.40
   5   5   4  141.19    8.00
  -5   5  -4  151.28    9.00
  -5   5  -4  152.88    9.40
  -5   5  -4  140.89    8.90
  -6  -5  -4  275.77   13.40
   6  -5   4  266.37   13.80
   6  -5   4  256.47   13.90
  -6   5  -4  293.47   16.60
  -6   5  -4  304.77   15.20
   6   5   4  269.27   12.90
   6   5   4  285.37   14.40
   6   5   4  264.07   13.30
  -6   5  -4  291.97   14.60
  -6   5  -4  265.57   13.80
   7   5   4  414.36   18.40
   7   5   4  364.06   18.30
  -7   5  -4  445.36   18.80
   7   5   4  443.06   19.20
  -7   5  -4  437.06   18.60
   9   6  -4  134.59    6.50
  -9   6   4  127.59    7.00
   9   6  -4  129.49    6.70
  -9   6   4  156.78    7.60
  -8  -6   4   43.90   10.50
   8  -6  -4   47.00    3.40
  -8   6   4   52.19    4.10
   8   6  -4   50.79    3.70
  -8   6   4   56.49    3.70
  -8   6   4   47.80    4.50
   8   6  -4   53.99    4.20
   8   6  -4   52.79    3.60
  -8   6   4   56.19    4.00
   7  -6  -4  339.37   16.00
   7  -6  -4  306.67   14.90
  -7   6   4  359.66   18.00
  -7   6   4  329.57   15.60
   7   6  -4  326.67   15.00
   7   6  -4  319.67   14.70
  -7   6   4  328.57   15.50
  -7   6   4  319.97   15.20
   7   6  -4  331.17   15.10
   6  -6  -4  249.08   12.90
  -6  -6   4  230.28   28.10
   6  -6  -4  266.07   12.90
  -6   6   4  254.57   13.50
  -6   6   4  252.67   13.60
   6   6  -4  241.38   11.80
  -6   6   4  270.77   12.70
  -6   6   4  275.87   15.00
   6   6  -4  260.37   12.30
   5  -6  -4  444.06   20.60
  -5  -6   4  422.76   40.30
   5  -6  -4  421.16   20.20
  -5   6   4  434.86   20.10
  -5   6   4  423.26   20.00
  -5   6   4  431.06   20.90
  -5   6   4  454.55   20.00
   5   6  -4  436.26   18.90
  -4  -6   4  768.62   43.30
  -4  -6   4  724.03   56.29
   4  -6  -4  736.93   32.80
  -4  -6   4  739.83   33.90
   4   6  -4  732.33   30.60
  -4   6   4  739.43   32.20
  -4   6   4  728.63   39.50
  -4   6   4  680.23   31.80
  -4   6   4  784.42   37.30
  -4   6   4  763.22   32.30
  -3  -6   4  351.36   25.50
  -3  -6   4  372.36   20.10
  -3  -6   4  376.56   37.60
   3  -6  -4  367.56   18.20
  -3  -6   4  363.56   19.20
  -3   6   4  370.56   18.40
  -3   6   4  349.87   18.60
  -3   6   4  378.56   17.50
  -3   6   4  397.86   17.80
  -3   6   4  394.06   23.90
  -2  -6   4  894.81   48.90
   2  -6  -4  978.30   41.10
  -2  -6   4  896.91   43.50
  -2  -6   4 1048.70   43.60
  -2  -6   4 1032.90   66.49
  -2  -6   4  814.52   46.70
  -2   6   4  919.41   40.20
  -2   6   4  956.00   41.90
  -2   6   4  964.60   40.20
  -2   6   4  965.00   45.50
  -2   6   4  917.91   40.20
   1  -6  -4 1164.68   48.00
  -1  -6   4 1132.39   50.39
  -1  -6   4 1212.38   73.89
  -1  -6   4 1022.40   56.39
  -1  -6   4 1168.58   51.29
  -1  -6   4 1154.38   47.60
  -1   6   4 1082.89   47.20
  -1   6   4 1062.19   51.69
  -1   6   4 1065.49   48.60
  -1   6   4 1102.09   47.20
  -1   6   4 1145.39   47.40
   0  -6   4  948.91   39.50
   0  -6  -4  921.21   39.20
   0  -6   4  905.51   42.50
   0  -6   4  929.61   42.10
   0  -6   4  877.71   61.29
   0   6   4  957.60   39.00
   0   6   4  873.41   38.70
   0   6   4  906.51   40.30
   0   6   4  912.51   38.90
   0   6   4  786.02   48.70
   1  -6   4  439.16   23.10
   1  -6   4  423.86   20.30
  -1  -6  -4  409.06   19.60
   1  -6   4  420.66   22.30
   1  -6   4  399.96   28.90
   1  -6   4  422.76   36.60
   1   6   4  399.96   23.20
   1   6   4  427.56   19.70
  -1   6  -4  422.56   19.00
   1   6   4  400.56   19.40
   1   6   4  418.76   21.20
   1   6   4  425.16   19.80
   2  -6   4   54.49   11.80
   2  -6   4   60.99    5.20
  -2  -6  -4   58.59    5.00
   2  -6   4   58.99    6.50
   2  -6   4   56.79    6.90
   2   6   4   59.69    4.80
   2   6   4   58.59    4.80
   2   6   4   56.19    4.50
  -2   6  -4   52.19    4.60
   2   6   4   46.20    5.30
  -2   6  -4   50.99    5.50
   3  -6   4  278.77   14.80
   3  -6   4  301.37   16.70
   3  -6   4  273.47   15.80
  -3   6  -4  277.97   14.10
  -3   6  -4  283.37   14.70
   3   6   4  284.97   14.20
   3   6   4  282.57   15.10
   3   6   4  262.67   14.80
   3   6   4  304.77   14.00
   4  -6   4   11.10    2.30
   4  -6   4   12.00    2.70
   4  -6   4   15.70    3.00
  -4   6  -4   12.30    2.50
  -4   6  -4   18.90    3.10
   4   6   4   17.40    2.10
  -4   6  -4   17.60    2.90
   4   6   4   12.30    2.30
   5  -6   4   48.80    5.70
   5  -6   4   61.79    5.00
   5  -6   4   57.89    4.50
  -5   6  -4   60.79    4.80
   5   6   4   62.09    4.30
   5   6   4   55.89    4.30
   5   6   4   64.39    4.10
   5   6   4   60.39    4.70
  -5   6  -4   56.69    4.30
  -5   6  -4   58.59    5.20
   6  -6   4  369.76   15.80
   6   6   4  360.66   15.20
  -6   6  -4  311.57   15.40
   6   6   4  330.47   15.20
  -6   6  -4  354.86   15.80
   6   6   4  364.56   15.90
   7  -7  -4   71.39    4.10
  -7   7   4   77.69    4.40
  -7   7   4   83.09    7.00
  -7   7   4   78.49    4.70
   6  -7  -4  175.08    9.00
  -6   7   4  174.08   11.50
  -6   7   4  186.88    9.50
  -6   7   4  189.78    9.30
  -6   7   4  186.68    9.10
   5  -7  -4  135.99    9.30
  -5  -7   4  113.19   19.40
  -5   7   4  157.98    8.10
  -5   7   4  154.28    8.10
  -5   7   4  131.09   10.60
  -5   7   4  146.29    9.80
  -4  -7   4   33.90    9.60
   4  -7  -4   37.90    3.60
  -4   7   4   36.80    3.50
  -4   7   4   34.20    4.60
  -4   7   4   36.30    4.40
  -4   7   4   35.00    3.10
   3  -7  -4  190.88   10.50
  -3  -7   4  195.78   23.10
  -3  -7   4  205.88   11.40
  -3   7   4  193.98   10.10
  -3   7   4  190.78   10.30
  -3   7   4  199.38   10.40
  -2  -7   4  410.46   21.00
  -2  -7   4  377.86   34.50
   2  -7  -4  437.86   20.00
  -2  -7   4  450.65   21.40
  -2   7   4  432.86   19.60
  -2   7   4  445.16   19.80
  -2   7   4  426.76   19.50
  -1  -7   4  152.48    8.10
  -1  -7   4  147.59   10.00
  -1  -7   4  153.68   10.00
  -1  -7   4  128.69   18.20
   1  -7  -4  150.18    8.60
  -1   7   4  150.68    8.50
  -1   7   4  143.99    8.40
  -1   7   4  157.68    8.60
   0  -7   4  164.28    9.00
   0  -7   4  170.38   11.00
   0  -7   4  173.88   11.10
   0  -7   4  158.88   18.90
   0  -7  -4  150.28    9.00
   0   7   4  167.78    9.20
   0   7   4  173.28    9.40
   0   7   4  167.18    9.00
   1  -7   4   92.69    7.50
   1  -7   4   92.99    6.10
  -1  -7  -4   91.79    5.90
   1  -7   4   89.09    7.30
   1   7   4   93.69    6.30
   1   7   4   91.19    5.80
   1   7   4   90.29    6.00
   2  -7   4  112.49    8.10
   2  -7   4  109.59    8.20
   2   7   4  126.99    7.30
   2   7   4  127.69    7.30
   2   7   4  136.49    8.70
   3  -7   4   32.80    3.80
   3  -7   4   27.70    3.30
   3  -7   4   31.90    3.10
   3   7   4   34.10    3.10
   3   7   4   30.50    3.40
   3   7   4   31.30    2.80
   3   7   4   33.30    3.30
  -3   7  -4   24.40    3.80
   4  -7   4   72.59    5.10
   4  -7   4   62.79    4.20
   4  -7   4   69.59    5.40
   4   7   4   68.59    4.10
   4   7   4   66.09    4.30
  -4   7  -4   69.89    4.80
  -4   7  -4   58.49    4.60
   5  -8  -4  103.99    4.90
  -5   8   4   95.69    4.90
  -5   8   4   83.99    5.10
   4  -8  -4  222.18   10.50
  -4   8   4  236.48   10.60
  -4   8   4  227.98   10.80
   3  -8  -4   43.30    3.30
  -3   8   4   39.60    3.50
   2  -8  -4  728.73   29.70
  -2   8   4  641.24   29.50
  -2   8   4  769.32   31.70
  -2   8   4  655.73   29.80
   1  -8  -4  148.59    7.60
  -1  -8   4  134.59    9.10
  -1  -8   4  151.28    8.50
  -1   8   4  145.99    8.40
  -1   8   4  141.59    7.70
   0  -8   4  138.79    8.20
   0  -8   4  136.59    8.10
   0  -8  -4  144.09    7.30
   0   8   4  138.59    7.40
   0   8   4  139.59    7.80
   1  -8   4    9.10    2.30
   1  -8   4    6.60    1.60
   1   8   4    6.10    1.40
   1   8   4    8.50    1.40
   2  -8   4  154.58    7.50
   2  -8   4  136.49    8.00
   2   8   4  133.19    6.60
   2   8   4  125.99    6.90
  12   0  -5   70.29    6.20
 -12   0   5   83.99    5.30
  12   0  -5   84.69    4.90
  11   0  -5    8.30    2.70
 -11   0   5    4.40    1.50
  11   0  -5    6.10    1.60
  10   0  -5  273.17   16.10
  10   0  -5  295.87   15.00
 -10   0   5  305.27   15.70
 -10   0   5  250.67   25.80
  10   0  -5  288.17   13.80
 -10   0   5  286.37   13.80
  10   0  -5  283.47   13.40
   9   0  -5  655.73   29.20
  -9   0   5  544.25   45.00
   9   0  -5  659.13   28.20
  -9   0   5  605.34   41.80
   9   0  -5  633.44   31.10
  -9   0   5  630.84   29.90
  -9   0   5  654.03   28.40
   9   0  -5  632.24   27.70
   9   0  -5  651.03   28.00
  -8   0   5  430.56   20.10
   8   0  -5  416.06   19.20
   8   0  -5  425.86   19.40
   8   0  -5  401.46   20.30
  -8   0   5  426.86   21.20
  -8   0   5  393.46   36.60
   8   0  -5  405.96   22.90
   8   0  -5  427.06   19.50
   7   0  -5  911.21   38.60
   7   0  -5  868.11   40.30
  -7   0   5  845.22   39.00
  -7   0   5  895.61   48.80
  -7   0   5  861.21   37.90
   7   0  -5  916.61   37.50
  -7   0   5  842.32   67.99
   7   0  -5  880.31   37.30
   6   0  -5    9.80    2.30
   6   0  -5    7.40    2.80
  -6   0   5   12.20    4.70
  -6   0   5    5.70    1.70
   5   0  -5  558.34   24.50
   5   0  -5  584.74   24.40
  -5   0   5  563.44   25.10
  -5   0   5  556.34   31.60
   4   0  -5  613.24   26.50
  -4   0   5  625.84   33.10
  -4   0   5  613.04   26.00
  -4   0   5  695.83   27.80
   4   0  -5  588.44   26.70
  -3   0   5   25.50    5.10
   3   0  -5   24.40    2.30
  -3   0   5   24.40    2.90
  -3   0   5   25.70    2.00
   3   0  -5   23.60    2.60
   2   0  -5 9048.89  371.56
  -2   0   5 9519.05  362.26
   2   0  -5 8834.72  362.56
  -1   0   5  372.06   17.20
  -1   0   5  362.86   15.70
   1   0  -5  355.06   15.70
   1   0  -5  329.47   15.80
   1   0  -5  318.57   21.90
   0   0   5  653.13   26.90
   0   0   5  631.14   28.20
   0   0  -5  597.24   28.00
   0   0  -5  570.44   36.60
   1   0   5   39.20    3.70
  -1   0  -5   39.50    3.80
  -1   0  -5   47.50    7.50
  -1   0  -5   37.40    3.50
  -2   0  -5    8.30    2.20
  -2   0  -5    6.90    1.70
  -2   0  -5    4.20    4.20
   2   0   5    7.70    2.10
  -2   0  -5    3.70    2.30
   3   0   5 6240.28  247.08
  -3   0  -5 6354.66  244.58
  -3   0  -5 5998.40  244.38
  -3   0  -5 6086.89  246.08
  -3   0  -5 5656.73  261.37
   3   0   5 6138.49  245.88
  -3   0  -5 6215.58  244.58
   3   0   5 6115.19  244.88
  -4   0  -5   43.00    4.70
  -4   0  -5   47.80    4.80
  -4   0  -5   54.49    4.70
   4   0   5   48.80    5.80
   4   0   5   47.60    4.70
  -4   0  -5   52.29    5.50
   4   0   5   49.00    5.80
  -5   0  -5   90.59    6.30
   5   0   5   89.09    8.20
  -5   0  -5   80.49    7.80
   5   0   5   82.19    6.40
  -5   0  -5   83.99    6.90
   5   0   5   80.19    8.50
  -5   0  -5   90.09    7.60
   6   0   5   46.70    6.00
  -6   0  -5   43.90    5.10
   6   0   5   41.40    4.90
  -7   0  -5  518.55   24.20
  -7   0  -5  468.05   24.80
   7   0   5  503.05   25.30
   7   0   5  510.65   22.40
   8   0   5   82.49    6.40
  -8   0  -5   91.09    5.70
  -8   0  -5   82.09    6.80
 -12  -1   5   38.10    3.10
  12  -1  -5   32.10    3.50
  12   1  -5   38.50    3.00
 -11  -1   5  527.15   38.30
  11  -1  -5  640.94   28.60
 -11  -1   5  649.14   27.60
  11   1  -5  630.94   26.00
  11   1  -5  538.85   28.00
 -11   1   5  611.14   26.20
 -11   1   5  610.24   31.30
  11   1  -5  658.03   27.50
  10  -1  -5  686.63   31.70
 -10  -1   5  626.14   47.00
  10  -1  -5  654.53   29.90
 -10  -1   5  662.83   30.40
  10   1  -5  633.04   28.90
 -10   1   5  673.63   29.40
 -10   1   5  658.43   30.70
  10   1  -5  664.03   29.90
  10   1  -5  659.13   30.40
  10   1  -5  683.93   28.60
  10   1  -5  638.24   31.60
  -9  -1   5  640.94   40.70
   9  -1  -5  644.74   27.70
   9  -1  -5  648.84   31.50
   9  -1  -5  658.13   29.70
  -9  -1   5  669.93   30.30
   9   1  -5  584.14   31.10
  -9   1   5  679.73   30.80
  -9   1   5  584.84   50.19
   9   1  -5  657.43   29.70
   9   1  -5  667.93   28.60
  -9   1   5  625.14   29.20
   9   1  -5  641.54   28.30
  -8  -1   5  989.20   44.20
   8  -1  -5 1011.80   43.90
   8  -1  -5 1052.29   42.70
  -8  -1   5  917.81   42.40
   8  -1  -5 1007.10   45.80
  -8  -1   5 1029.70   55.09
  -8  -1   5  978.20   66.99
   8  -1  -5 1003.40   42.30
  -8   1   5 1005.50   43.50
   8   1  -5 1075.69   42.60
   8   1  -5  992.80   42.60
  -8   1   5 1056.79   41.70
  -8   1   5  954.40   58.09
  -8   1   5 1018.40   44.90
   8   1  -5  999.70   43.90
   8   1  -5  949.90   42.40
  -7  -1   5 1960.40   88.79
   7  -1  -5 2071.39   86.69
  -7  -1   5 2086.39  112.29
   7  -1  -5 2157.78   85.69
   7  -1  -5 2104.39   85.49
  -7  -1   5 2172.48   97.19
   7  -1  -5 2110.89   85.69
  -7  -1   5 1996.00   85.49
  -7  -1   5 2092.89   87.09
   7  -1  -5 2078.49   88.59
   7   1  -5 2088.19   86.69
  -7   1   5 2118.59   87.19
  -7   1   5 2127.59   85.09
  -7   1   5 2119.69   86.49
   7   1  -5 2128.59   85.39
  -7   1   5 2067.19   87.59
  -7   1   5 2155.18   84.89
   7   1  -5 2043.90   85.49
   7   1  -5 2067.79   85.19
  -7   1   5 2170.88  100.99
   6  -1  -5  669.13   31.90
  -6  -1   5  752.12   34.00
  -6  -1   5  716.83   39.10
   6  -1  -5  738.23   31.30
   6  -1  -5  715.23   33.60
   6  -1  -5  738.23   31.60
  -6  -1   5  713.83   32.20
   6  -1  -5  734.73   31.20
  -6  -1   5  749.42   51.69
  -6   1   5  716.23   30.80
   6   1  -5  761.12   30.80
  -6   1   5  761.22   32.70
  -6   1   5  719.63   41.20
  -6   1   5  738.13   32.30
   6   1  -5  707.53   30.80
  -6   1   5  718.73   31.30
  -6   1   5  721.33   30.70
   6   1  -5  692.03   31.90
  -6   1   5  717.13   33.00
   6   1  -5  706.13   31.20
  -5  -1   5 2015.60   89.19
   5  -1  -5 1919.21   81.89
   5  -1  -5 2008.60   81.79
  -5  -1   5 2004.80   83.79
  -5   1   5 1965.20   81.39
  -5   1   5 2149.98   83.39
  -5   1   5 2012.90   81.49
   5   1  -5 2011.50   81.29
  -5   1   5 2029.70   91.69
   5   1  -5 2019.70   81.49
  -4  -1   5  339.07   16.60
  -4  -1   5  344.47   15.50
  -4  -1   5  346.07   20.30
   4  -1  -5  332.97   15.20
   4  -1  -5  316.77   15.20
  -4   1   5  360.06   16.40
   4   1  -5  331.97   14.80
  -4   1   5  315.27   14.70
   4   1  -5  322.57   14.60
  -4   1   5  311.17   21.30
  -4   1   5  327.27   15.40
   3  -1  -5  943.01   39.20
   3  -1  -5  910.51   39.30
  -3  -1   5  956.60   40.20
  -3  -1   5  985.90   40.00
  -3  -1   5 1019.20   40.70
  -3  -1   5  907.91   44.10
  -3   1   5  912.71   46.10
   3   1  -5  891.71   38.80
  -3   1   5  979.80   39.80
  -3   1   5  885.11   38.70
  -3   1   5  976.20   38.90
  -3   1   5  908.61   40.20
   2  -1  -5 2210.88   91.59
   2  -1  -5 2291.57   91.39
  -2  -1   5 2321.37   93.39
   2  -1  -5 2223.28   99.99
  -2   1   5 2234.68   92.69
   2   1  -5 2143.09   90.79
  -2   1   5 2230.38   90.99
  -2   1   5 2318.17   91.89
  -2   1   5 2391.36   91.79
   1  -1  -5 1233.58   50.89
  -1  -1   5 1265.77   50.19
   1  -1  -5 1250.67   59.39
  -1  -1   5 1390.26   53.79
   1  -1  -5 1155.38   50.99
  -1   1   5 1274.47   52.29
   1   1  -5 1125.29   58.99
   1   1  -5 1182.08   50.39
  -1   1   5 1304.87   50.49
   1   1  -5 1136.19   50.69
  -1   1   5 1232.08   51.39
  -1   1   5 1238.68   50.49
   0  -1  -5  278.87   20.70
   0  -1  -5  302.37   14.30
   0  -1   5  309.77   13.90
   0  -1  -5  289.47   13.90
   0   1  -5  293.27   13.60
   0   1  -5  273.47   16.50
   0   1   5  290.17   15.20
   0   1   5  301.67   13.50
   0   1   5  310.27   14.60
  -1  -1  -5  700.13   40.30
  -1  -1  -5  709.63   30.60
   1  -1   5  705.43   30.80
  -1  -1  -5  697.73   30.40
   1   1   5  694.63   29.70
   1   1   5  711.43   32.10
   1   1   5  722.63   31.30
   1   1   5  687.13   29.70
  -1   1  -5  718.93   30.30
  -1   1  -5  673.03   30.40
  -2  -1  -5  790.52   47.40
   2  -1   5  795.82   37.60
   2  -1   5  866.71   55.29
   2  -1   5  891.21   37.20
  -2  -1  -5  807.62   35.90
  -2  -1  -5  849.12   36.10
  -2  -1  -5  811.52   37.40
  -2  -1  -5  862.51   36.00
   2   1   5  788.62   36.60
  -2   1  -5  875.31   36.10
   2   1   5  839.32   37.10
   2   1   5  873.91   35.20
   2   1   5  839.82   35.40
   2   1   5  812.82   35.20
  -2   1  -5  830.42   36.30
  -3  -1  -5  291.87   16.10
  -3  -1  -5  300.37   26.60
  -3  -1  -5  283.87   14.50
   3  -1   5  322.17   16.60
   3  -1   5  273.47   16.20
   3  -1   5  299.17   15.10
  -3  -1  -5  288.77   14.70
   3   1   5  308.17   17.30
   3   1   5  295.87   14.00
   3   1   5  312.47   16.20
  -3   1  -5  272.87   14.70
  -3   1  -5  288.37   16.10
  -3   1  -5  288.87   15.10
  -3   1  -5  307.77   15.30
   3   1   5  284.77   13.60
   3   1   5  283.97   15.30
  -4  -1  -5   22.90    9.30
  -4  -1  -5    5.20    2.30
  -4  -1  -5    7.50    2.50
  -4  -1  -5   10.50    2.20
   4  -1   5    7.90    1.90
  -4   1  -5   11.60    2.60
  -4   1  -5    9.20    2.70
   4   1   5    9.30    2.40
   4   1   5    6.70    2.90
   4   1   5   12.60    1.80
  -4   1  -5   10.40    2.40
   4   1   5    8.00    2.40
   4   1   5    4.50    2.10
  -4   1  -5    8.80    2.30
   5  -1   5   74.29    8.50
   5  -1   5   72.69    7.20
  -5  -1  -5   64.79    4.90
  -5  -1  -5   82.49    7.00
   5  -1   5   78.69    6.70
   5  -1   5   78.99   10.30
   5   1   5   74.19    7.50
  -5   1  -5   76.59    6.00
  -5   1  -5   75.89    6.20
  -5   1  -5   74.29    6.20
  -5   1  -5   71.29    6.80
   5   1   5   76.19    6.30
   5   1   5   73.09    7.70
   5   1   5   76.49    4.60
  -6  -1  -5  149.19   13.70
   6  -1   5  139.49    8.40
   6  -1   5  142.89    9.50
  -6   1  -5  162.58    9.90
  -6   1  -5  165.68    9.60
  -6   1  -5  171.78   11.80
   6   1   5  174.88   12.80
  -7  -1  -5   99.89    7.90
   7  -1   5   88.49    7.30
  -7  -1  -5   97.59    6.90
  -7   1  -5   98.89    7.30
  -7   1  -5   95.89    8.40
   7   1   5   94.59    7.90
  -7   1  -5  100.19    5.70
  -7   1  -5   87.99    7.90
   8  -1   5   28.50    3.50
  -8  -1  -5   36.40    4.00
  -8  -1  -5   32.30    3.50
  -8   1  -5   39.30    4.10
   8   1   5   42.90    3.40
  -8   1  -5   36.90    3.50
   8   1   5   34.40    4.00
  12  -2  -5  195.38   10.10
 -12  -2   5  183.98    8.70
  12   2  -5  206.48    9.70
 -12   2   5  206.18   11.10
 -11  -2   5  173.78    9.40
  11  -2  -5  176.08   10.50
 -11   2   5  181.98   10.20
  11   2  -5  175.28    8.70
 -11   2   5  168.58    9.10
  11   2  -5  176.88    9.60
  11   2  -5  176.78    8.90
  10  -2  -5   51.19    5.40
  10  -2  -5   55.99    4.60
 -10  -2   5   47.50   11.60
 -10  -2   5   57.69    4.70
  10   2  -5   49.00    4.50
  10   2  -5   55.59    4.40
 -10   2   5   43.70    4.90
  10   2  -5   57.49    4.20
 -10   2   5   46.30    4.40
  10   2  -5   44.80    4.40
  -9  -2   5  317.67   33.70
  -9  -2   5  299.57   23.50
  -9  -2   5  317.57   16.20
   9  -2  -5  302.97   17.50
   9  -2  -5  300.67   16.10
  -9   2   5  334.37   18.10
   9   2  -5  323.17   15.20
   9   2  -5  311.17   16.20
  -9   2   5  321.57   16.10
  -9   2   5  268.57   15.90
   9   2  -5  298.57   15.00
   9   2  -5  322.47   15.10
   8  -2  -5 1335.07   58.09
  -8  -2   5 1383.96   58.09
   8  -2  -5 1355.66   59.99
  -8   2   5 1422.76   58.19
  -8   2   5 1353.26   56.19
   8   2  -5 1324.97   57.89
   8   2  -5 1331.87   56.79
  -8   2   5 1342.57   56.69
  -8   2   5 1357.26   59.09
   8   2  -5 1358.76   56.69
   8   2  -5 1412.96   56.59
   7  -2  -5 2067.89   89.69
  -7  -2   5 2178.68  119.59
  -7  -2   5 2185.88   96.59
  -7  -2   5 2285.57  100.79
   7  -2  -5 2204.38   92.09
   7  -2  -5 2179.28   93.69
  -7  -2   5 2198.38   91.69
  -7   2   5 2253.17   93.79
  -7   2   5 2301.57   90.79
   7   2  -5 2188.68   91.89
   7   2  -5 2158.78   90.49
  -7   2   5 2252.67   90.59
  -7   2   5 2285.37   90.39
  -7   2   5 2284.37   92.09
  -7   2   5 2199.38   92.99
   7   2  -5 2364.76   90.49
   7   2  -5 2224.28   90.79
  -6  -2   5 1520.15   63.89
   6  -2  -5 1600.24   66.09
  -6  -2   5 1564.34   70.99
  -6  -2   5 1472.25   67.69
   6  -2  -5 1567.94   64.69
   6  -2  -5 1454.95   63.19
  -6  -2   5 1630.34   90.19
  -6   2   5 1559.94   65.79
  -6   2   5 1494.75   64.19
   6   2  -5 1537.45   64.79
  -6   2   5 1357.66   65.79
  -6   2   5 1579.44   63.09
  -6   2   5 1553.54   76.99
  -6   2   5 1529.55   62.99
   6   2  -5 1576.34   62.99
  -6   2   5 1547.85   63.19
  -5  -2   5  612.84   28.10
   5  -2  -5  629.44   28.80
  -5  -2   5  641.94   31.30
   5  -2  -5  689.73   29.30
  -5  -2   5  647.74   33.30
   5  -2  -5  619.04   29.80
  -5  -2   5  663.93   47.10
  -5   2   5  636.34   27.60
   5   2  -5  656.23   27.10
   5   2  -5  633.04   27.30
  -5   2   5  594.04   28.40
  -5   2   5  607.14   37.30
  -5   2   5  696.63   30.10
  -5   2   5  671.53   27.70
  -5   2   5  612.94   27.40
  -4  -2   5   66.59    6.30
  -4  -2   5   59.79    6.80
  -4  -2   5   62.79    5.20
   4  -2  -5   50.79    5.10
  -4   2   5   53.99    8.70
   4   2  -5   74.59    4.30
   4   2  -5   63.09    3.80
  -4   2   5   62.79    5.50
  -4   2   5   64.99    4.30
  -3  -2   5 2930.51  116.99
  -3  -2   5 3074.59  117.59
  -3   2   5 2879.51  113.89
  -3   2   5 2651.83  123.19
   3   2  -5 2622.84  113.39
  -3   2   5 2969.30  116.09
   3   2  -5 2874.21  113.29
  -3   2   5 2688.03  113.89
  -2  -2   5 1179.48   49.99
   2  -2  -5 1108.69   47.30
  -2  -2   5 1156.98   50.59
   2  -2  -5 1130.19   56.19
  -2   2   5 1174.08   48.70
  -2   2   5 1159.78   48.90
  -2   2   5 1090.09   47.00
  -2   2   5 1136.99   47.00
  -1  -2   5  448.06   22.90
   1  -2  -5  435.16   19.50
   1  -2  -5  459.15   27.70
  -1   2   5  437.36   21.00
   1   2  -5  419.46   18.80
  -1   2   5  428.06   19.20
  -1   2   5  426.16   20.50
  -1   2   5  445.66   19.20
   0  -2  -5  994.60   46.00
   0  -2   5 1107.09   50.19
   0  -2  -5 1114.29   55.99
   0   2   5 1128.69   45.60
   0   2   5 1108.99   45.70
   0   2   5 1080.59   47.60
   0   2  -5 1112.39   45.50
   0   2   5 1161.78   47.40
   1  -2   5   89.99    8.40
  -1  -2  -5   88.19   11.30
   1  -2   5   84.99   15.30
   1   2   5   85.09    6.50
   1   2   5   86.59    8.60
   1   2   5   79.29    5.60
   1   2   5   93.29    5.60
  -1   2  -5   84.59    5.50
   1   2   5   88.09    5.40
   1   2   5   87.19    7.00
  -1   2  -5   85.39    5.90
   2  -2   5 1430.86   61.09
  -2  -2  -5 1382.76   72.59
   2  -2   5 1508.65   65.59
   2  -2   5 1277.17   61.59
   2  -2   5 1441.26   61.49
   2   2   5 1425.86   60.69
  -2   2  -5 1390.66   59.99
  -2   2  -5 1482.75   59.69
   2   2   5 1541.05   59.29
   2   2   5 1391.76   58.99
   2   2   5 1452.35   70.29
  -2   2  -5 1469.85   60.29
  -2   2  -5 1321.77   60.99
   2   2   5 1480.75   61.39
   2   2   5 1442.76   58.89
   3  -2   5  852.11   38.30
  -3  -2  -5  877.71   37.90
   3  -2   5  779.52   38.20
  -3  -2  -5  805.82   50.19
   3  -2   5  852.41   42.60
   3  -2   5  856.61   38.40
   3   2   5  837.92   35.60
  -3   2  -5  812.92   38.10
  -3   2  -5  831.12   37.00
  -3   2  -5  808.02   36.80
  -3   2  -5  820.52   36.60
   3   2   5  840.42   35.80
   3   2   5  816.32   39.50
   3   2   5  857.41   37.50
   3   2   5  889.31   38.60
  -4  -2  -5  212.98   13.30
   4  -2   5  228.58   14.10
   4  -2   5  235.58   14.80
   4  -2   5  235.38   17.90
   4  -2   5  223.18   13.80
  -4  -2  -5  223.48   27.60
   4   2   5  248.08   11.80
  -4   2  -5  243.58   13.20
   4   2   5  237.28   12.10
  -4   2  -5  253.77   13.20
  -4   2  -5  241.18   13.10
   4   2   5  241.68   12.20
   4   2   5  234.58   13.50
   4   2   5  238.28   14.50
  -4   2  -5  227.18   14.00
  -5  -2  -5   58.29    5.60
  -5  -2  -5   39.60   12.80
   5  -2   5   49.90    5.40
   5  -2   5   55.89    5.90
   5  -2   5   44.30   10.60
   5  -2   5   43.50    5.30
  -5   2  -5   54.69    5.00
   5   2   5   65.29    5.60
  -5   2  -5   53.49    6.00
  -5   2  -5   53.39    5.20
   5   2   5   59.99    4.50
   5   2   5   59.89    4.20
  -5   2  -5   56.69    5.50
   5   2   5   60.09    6.90
   5   2   5   55.59    5.10
   5   2   5   48.10    6.80
   6  -2   5  133.19    9.60
  -6  -2  -5  139.59    8.80
   6  -2   5  134.49    9.00
   6   2   5  139.49    7.20
  -6   2  -5  137.49    9.60
   6   2   5  147.39    9.30
  -6   2  -5  146.69    9.10
   6   2   5  133.59   10.50
  -6   2  -5  143.69    9.00
  -6   2  -5  133.39    8.40
  -7  -2  -5   87.49    7.10
  -7  -2  -5   82.39    6.50
   7  -2   5   88.19    6.80
  -7   2  -5   96.59    8.60
  -7   2  -5   87.09    5.60
   7   2   5   81.89    7.30
   7   2   5   87.19    6.30
  -7   2  -5  100.79    7.60
  -7   2  -5   90.19    6.80
  -8  -2  -5  140.69    8.30
   8  -2   5  139.19    7.70
   8  -2   5  141.09    7.90
   8   2   5  136.19    8.30
  -8   2  -5  142.39    8.00
   8   2   5  142.69    7.90
  11  -3  -5  207.48   10.80
 -11  -3   5  194.88    8.80
 -11   3   5  195.48   10.60
 -11   3   5  190.38    9.80
  11   3  -5  193.78    9.50
  11   3  -5  191.98    9.30
  11   3  -5  200.48   11.80
 -10  -3   5  687.13   28.90
 -10  -3   5  582.54   46.40
 -10   3   5  678.93   30.80
 -10   3   5  659.23   27.40
  10   3  -5  676.73   28.80
 -10   3   5  674.73   29.60
  10   3  -5  686.23   28.80
  10   3  -5  676.83   29.50
  10   3  -5  656.83   28.60
   9  -3  -5  127.09    7.80
   9  -3  -5  134.69    9.70
  -9  -3   5  153.68   22.50
  -9  -3   5  136.19    8.10
  -9   3   5  135.39    7.30
   9   3  -5  136.79    7.80
  -9   3   5  133.19    9.50
   9   3  -5  131.09    8.40
  -9   3   5  132.99    8.60
  -9   3   5  108.09    8.40
   9   3  -5  143.49    7.90
   9   3  -5  136.29    7.70
  -9   3   5  124.49    9.50
  -8  -3   5   23.20    8.90
   8  -3  -5   20.50    3.50
  -8  -3   5   14.80    4.80
   8  -3  -5   20.10    3.50
  -8  -3   5   33.10   13.20
  -8  -3   5   19.80    2.70
  -8   3   5   15.50    2.70
   8   3  -5   16.10    2.50
  -8   3   5   18.20    2.50
  -8   3   5   10.80    2.30
   8   3  -5   17.60    2.90
  -8   3   5   26.60    4.40
   8   3  -5   15.70    2.50
   8   3  -5   16.80    2.60
  -8   3   5   13.20    2.80
  -7  -3   5  294.67   14.60
   7  -3  -5  296.57   16.70
  -7  -3   5  279.97   20.60
  -7  -3   5  302.77   33.20
  -7  -3   5  282.37   19.30
   7  -3  -5  293.17   15.20
  -7  -3   5  268.57   18.80
  -7   3   5  304.97   15.50
   7   3  -5  297.97   13.90
  -7   3   5  286.07   14.40
   7   3  -5  307.87   14.30
   7   3  -5  276.87   14.90
  -7   3   5  291.17   14.10
   7   3  -5  279.97   14.10
  -7   3   5  283.77   16.70
   6  -3  -5  438.26   22.70
   6  -3  -5  442.56   21.40
  -6  -3   5  478.45   41.50
  -6  -3   5  445.56   24.80
  -6  -3   5  441.46   26.40
  -6  -3   5  458.45   20.70
  -6   3   5  392.86   22.20
   6   3  -5  448.96   20.20
   6   3  -5  427.16   20.30
  -6   3   5  473.65   20.60
  -6   3   5  475.05   20.70
  -6   3   5  453.45   20.40
   6   3  -5  412.96   21.00
  -6   3   5  475.55   24.10
  -6   3   5  454.05   21.60
   6   3  -5  456.85   19.90
  -5  -3   5   73.49    5.10
   5  -3  -5   78.09    6.30
   5  -3  -5   75.89    6.40
  -5  -3   5   69.59    8.20
  -5  -3   5   89.49   16.50
  -5   3   5   70.19    5.70
  -5   3   5   83.79    5.20
  -5   3   5   71.59    5.00
  -5   3   5   65.09    5.70
   5   3  -5   72.49    4.50
  -5   3   5   63.79   10.30
  -5   3   5   69.19    6.90
  -4  -3   5 3012.80  125.09
   4  -3  -5 2816.62  123.99
  -4  -3   5 3379.86  152.08
  -4  -3   5 2995.00  126.99
  -4   3   5 3077.39  124.79
  -4   3   5 3087.99  121.89
   4   3  -5 2998.70  120.89
   4   3  -5 2832.62  121.09
  -3  -3   5  494.85   24.20
  -3  -3   5  461.85   23.80
  -3  -3   5  465.45   23.50
   3  -3  -5  437.16   21.90
   3  -3  -5  470.65   29.10
  -3   3   5  427.26   19.80
   3   3  -5  408.16   19.20
  -3   3   5  480.55   22.40
   3   3  -5  442.36   18.90
  -3   3   5  407.56   21.90
  -3   3   5  398.76   21.00
  -3   3   5  473.65   19.90
  -2  -3   5  985.70   45.30
   2  -3  -5  900.51   42.40
  -2  -3   5  954.20   44.30
   2  -3  -5  927.61   49.70
  -2  -3   5  876.21   43.50
  -2  -3   5 1075.49   63.59
  -2   3   5  974.00   42.60
  -2   3   5  958.20   40.20
  -2   3   5  980.10   42.80
   2   3  -5  952.50   39.30
  -2   3   5  996.60   40.20
  -1  -3   5  733.33   33.90
   1  -3  -5  692.23   32.80
   1  -3  -5  733.23   40.10
  -1  -3   5  677.03   35.10
  -1  -3   5  741.93   51.09
   1   3  -5  636.14   29.70
   1   3  -5  704.53   29.50
  -1   3   5  738.03   32.60
  -1   3   5  683.63   30.10
  -1   3   5  682.63   30.00
  -1   3   5  750.42   32.60
   0  -3  -5   62.19    9.40
   0  -3   5   46.30   11.70
   0  -3  -5   54.59    4.10
   0  -3  -5   46.20    5.60
   0  -3   5   49.60    6.80
   0  -3   5   44.80    5.30
   0  -3   5   45.70    6.00
   0   3  -5   44.00    4.20
   0   3   5   47.20    5.10
   0   3   5   46.50    4.90
   0   3   5   50.29    3.90
   0   3   5   48.60    4.60
   0   3  -5   48.20    3.60
   0   3   5   49.50    3.90
   1  -3   5  330.77   18.40
   1  -3   5  353.26   21.60
   1  -3   5  314.47   16.00
   1  -3   5  329.97   17.80
   1  -3   5  369.06   33.60
  -1  -3  -5  295.47   23.90
  -1  -3  -5  330.87   19.70
  -1  -3  -5  306.17   16.40
   1   3   5  319.67   15.20
   1   3   5  311.07   16.60
   1   3   5  315.57   15.20
  -1   3  -5  297.67   15.40
  -1   3  -5  325.17   15.30
   1   3   5  328.97   17.30
   1   3   5  313.67   17.50
   1   3   5  313.07   15.30
   2  -3   5  349.37   19.40
   2  -3   5  337.07   19.80
  -2  -3  -5  372.56   28.10
   2  -3   5  366.56   18.40
   2  -3   5  419.26   36.20
  -2  -3  -5  339.67   22.60
   2  -3   5  361.06   23.50
  -2  -3  -5  365.16   18.40
   2   3   5  388.16   17.30
   2   3   5  356.96   18.60
   2   3   5  392.26   17.20
   2   3   5  396.06   17.40
  -2   3  -5  329.37   21.20
   2   3   5  361.66   19.40
  -2   3  -5  369.66   17.50
  -2   3  -5  363.86   17.80
   2   3   5  351.86   19.70
  -2   3  -5  325.17   18.40
  -3  -3  -5    2.00    5.00
  -3  -3  -5   -0.70    1.80
  -3  -3  -5    4.20    4.00
   3  -3   5    3.10    2.00
   3  -3   5   -1.70    4.80
  -3   3  -5   -0.20    1.50
  -3   3  -5    0.00    1.80
   3   3   5    4.40    1.50
   3   3   5    2.60    1.10
   3   3   5    1.50    4.20
  -3   3  -5    0.90    1.30
  -3   3  -5    5.50    2.40
  -4  -3  -5  355.96   31.40
   4  -3   5  415.06   20.20
   4  -3   5  346.77   25.50
  -4  -3  -5  406.86   27.30
   4  -3   5  354.86   20.10
   4  -3   5  389.36   20.50
  -4  -3  -5  379.86   18.80
   4   3   5  414.36   20.10
  -4   3  -5  375.76   20.20
   4   3   5  380.76   18.20
  -4   3  -5  374.56   19.00
   4   3   5  369.86   21.70
   4   3   5  393.06   17.90
   4   3   5  384.46   18.20
  -4   3  -5  377.26   19.20
  -4   3  -5  387.36   19.10
   4   3   5  378.56   20.90
   5  -3   5  179.08   12.10
   5  -3   5  176.28   12.10
   5  -3   5  151.58   13.10
  -5  -3  -5  183.38   35.60
  -5   3  -5  186.18   11.30
   5   3   5  199.28    9.80
  -5   3  -5  181.88   10.90
   5   3   5  183.48   13.00
   5   3   5  181.68   11.40
  -5   3  -5  183.68   11.10
   5   3   5  181.98   10.10
   5   3   5  191.08   10.10
   6  -3   5   11.60    2.80
   6  -3   5   10.60    2.30
  -6   3  -5   15.10    2.80
   6   3   5   12.20    3.10
  -6   3  -5    8.10    2.20
   6   3   5   16.30    6.10
   6   3   5   17.30    2.60
   6   3   5   12.30    1.70
  -6   3  -5    8.50    2.10
  -6   3  -5   13.60    2.80
   6   3   5   12.60    2.40
   7  -3   5   19.40    2.60
  -7  -3  -5   23.70    4.20
   7  -3   5   24.40    3.40
  -7   3  -5   17.00    3.40
  -7   3  -5   20.10    2.90
  -7   3  -5   18.80    2.80
  -7   3  -5   22.00    3.20
   8  -3   5    0.70    0.60
  -8  -3  -5    0.90    3.70
  -8  -3  -5    1.20    1.30
  -8   3  -5    1.40    1.00
  11  -4  -5   30.40    2.70
  11   4  -5   26.80    3.20
 -11   4   5   27.90    2.40
  11   4  -5   30.20    2.20
 -10  -4   5   75.89   13.70
  10  -4  -5   91.39    6.30
 -10   4   5   89.19    5.70
 -10   4   5   84.69    5.10
  10   4  -5   92.49    5.20
  10   4  -5   91.09    5.40
  10   4  -5   84.19    5.80
  10   4  -5   80.39    7.30
   9  -4  -5  366.86   19.10
   9   4  -5  409.96   17.50
  -9   4   5  356.46   18.10
  -9   4   5  370.46   17.10
  -9   4   5  363.16   16.80
   9   4  -5  383.26   17.30
   9   4  -5  365.66   17.90
   9   4  -5  392.66   17.40
  -9   4   5  363.06   17.60
  -8  -4   5  218.18   28.20
   8  -4  -5  217.78   13.30
  -8   4   5  216.08   12.40
   8   4  -5  218.58   11.10
   8   4  -5  248.48   11.50
  -8   4   5  217.68   11.40
   8   4  -5  202.78   11.10
   8   4  -5  205.28   11.70
  -8   4   5  217.48   11.70
  -8   4   5  221.98   11.20
   7  -4  -5   41.00    4.90
  -7  -4   5   44.80   12.90
  -7  -4   5   32.60   11.50
   7   4  -5   39.40    3.60
   7   4  -5   44.50    3.90
  -7   4   5   34.20    4.20
  -7   4   5   37.10    3.80
   7   4  -5   34.70    4.00
   7   4  -5   49.10    4.10
  -7   4   5   42.80    3.80
   6  -4  -5  445.16   20.40
  -6  -4   5  435.06   23.10
  -6  -4   5  458.65   42.80
   6  -4  -5  448.66   22.60
   6   4  -5  407.96   20.00
  -6   4   5  444.46   20.60
  -6   4   5  449.56   21.50
   6   4  -5  438.86   19.50
  -6   4   5  445.56   20.20
   6   4  -5  406.86   19.90
  -6   4   5  450.35   20.50
  -5  -4   5  994.30   67.39
  -5  -4   5  910.01   41.80
   5  -4  -5  830.62   38.20
   5  -4  -5  882.61   40.80
  -5  -4   5  843.62   46.70
  -5   4   5  917.91   38.30
  -5   4   5  931.61   38.40
   5   4  -5  857.81   37.10
   5   4  -5  848.32   37.40
  -5   4   5  924.71   42.60
  -4  -4   5  608.84   31.40
   4  -4  -5  648.44   29.50
  -4  -4   5  610.64   28.80
   4  -4  -5  640.74   38.10
  -4  -4   5  601.84   30.60
   4  -4  -5  616.64   27.50
  -4  -4   5  621.54   32.90
  -4   4   5  595.04   30.30
  -4   4   5  601.24   28.10
  -4   4   5  601.74   26.90
  -4   4   5  615.24   27.10
  -4   4   5  632.14   27.10
  -3  -4   5 2568.74  101.69
   3  -4  -5 2338.27   99.29
  -3  -4   5 2354.86   99.39
   3  -4  -5 2439.46  109.19
   3  -4  -5 2378.06   97.29
  -3  -4   5 2284.57  102.69
  -3  -4   5 2103.89  104.19
  -3   4   5 2584.34  106.19
  -3   4   5 2480.15  100.49
  -3   4   5 2521.85   96.99
  -3   4   5 2271.97   96.69
  -3   4   5 2412.46   96.89
  -3   4   5 2321.27   98.19
   3   4  -5 2342.67   95.39
   2  -4  -5  313.47   16.90
  -2  -4   5  286.47   18.50
  -2  -4   5  341.97   33.20
  -2  -4   5  326.87   18.30
  -2  -4   5  305.47   17.20
  -2  -4   5  313.37   20.30
   2  -4  -5  294.77   22.50
   2  -4  -5  288.17   14.70
  -2   4   5  302.27   17.30
  -2   4   5  314.67   17.30
  -2   4   5  278.67   15.60
   2   4  -5  294.57   13.30
  -2   4   5  313.67   14.50
  -2   4   5  307.27   14.60
  -2   4   5  299.37   14.50
  -1  -4   5  224.68   26.00
  -1  -4   5  196.28   13.50
   1  -4  -5  206.98   18.50
   1  -4  -5  186.18   10.70
  -1  -4   5  207.18   16.20
  -1  -4   5  208.98   13.20
  -1   4   5  190.98   11.90
  -1   4   5  205.78   10.70
   1   4  -5  224.88   10.00
  -1   4   5  200.78   13.40
  -1   4   5  197.88   10.60
  -1   4   5  216.28   13.10
  -1   4   5  223.88   10.80
   0  -4   5  347.27   16.40
   0  -4   5  358.16   18.70
   0  -4   5  317.97   21.90
   0  -4   5  350.16   33.50
   0  -4   5  318.17   18.80
   0  -4  -5  323.87   15.50
   0  -4  -5  304.67   24.10
   0   4   5  299.07   15.10
   0   4  -5  310.27   14.70
   0   4   5  304.07   17.70
   0   4   5  330.07   18.10
   0   4  -5  281.17   15.10
   0   4   5  312.57   16.70
   0   4   5  327.17   15.50
   0   4   5  318.17   15.30
   1  -4   5  353.46   17.70
   1  -4   5  358.76   19.70
  -1  -4  -5  355.06   16.80
   1  -4   5  374.06   24.40
  -1  -4  -5  357.26   21.90
  -1  -4  -5  336.27   26.20
   1  -4   5  379.86   36.00
   1  -4   5  332.37   19.80
   1   4   5  346.27   19.50
   1   4   5  351.66   16.90
   1   4   5  361.56   16.80
  -1   4  -5  344.97   16.60
   1   4   5  325.17   16.50
  -1   4  -5  320.47   16.80
   1   4   5  357.56   18.40
   1   4   5  368.56   19.60
   2  -4   5  813.72   45.40
   2  -4   5  921.31   60.79
  -2  -4  -5  878.01   49.90
   2  -4   5  852.51   40.20
   2  -4   5  842.22   37.70
   2  -4   5  797.62   39.30
  -2  -4  -5  848.32   45.60
   2  -4   5  818.32   35.80
   2   4   5  861.21   39.80
   2   4   5  853.81   36.50
  -2   4  -5  751.42   37.40
   2   4   5  808.02   40.70
   2   4   5  907.21   36.80
   2   4   5  828.22   36.50
  -2   4  -5  814.62   37.00
   2   4   5  885.51   38.50
  -2   4  -5  859.91   36.80
   3  -4   5   34.20    4.40
  -3  -4  -5   30.70    8.80
   3  -4   5   40.60    3.90
  -3  -4  -5   44.10   10.30
   3  -4   5   51.49    5.80
   3  -4   5   33.00   10.40
   3  -4   5   32.70    4.90
   3   4   5   36.50    3.90
   3   4   5   46.70    6.30
   3   4   5   41.70    4.70
  -3   4  -5   34.50    5.10
   3   4   5   40.00    4.00
   3   4   5   42.00    3.80
  -3   4  -5   50.39    5.00
  -3   4  -5   49.30    4.90
   4  -4   5  270.37   16.40
   4  -4   5  292.87   15.70
  -4  -4  -5  261.57   24.50
   4  -4   5  281.27   16.40
   4   4   5  313.77   14.30
   4   4   5  300.27   14.60
   4   4   5  279.37   15.80
  -4   4  -5  291.97   15.20
  -4   4  -5  299.87   15.50
  -4   4  -5  274.27   15.40
   5  -4   5   32.80    4.10
   5  -4   5   38.50    4.00
   5  -4   5   41.20    3.60
   5  -4   5   40.90    4.40
  -5   4  -5   39.00    4.00
  -5   4  -5   41.60    4.60
   5   4   5   41.00    3.40
   5   4   5   38.60    3.90
  -5   4  -5   40.30    4.30
   5   4   5   35.80    4.80
   6  -4   5   12.50    2.30
   6  -4   5   15.30    2.50
   6  -4   5   13.10    1.80
  -6   4  -5   12.00    2.30
   6   4   5   15.80    1.80
   6   4   5   10.80    1.90
  -6   4  -5   14.70    2.60
  -6   4  -5   11.10    2.40
   6   4   5   12.60    2.20
  -6   4  -5   12.80    2.20
   6   4   5   18.30    3.80
   7  -4   5   62.19    5.10
  -7   4  -5   65.39    4.60
   7   4   5   64.89    3.20
   7   4   5   64.49    4.60
  -7   4  -5   72.89    4.30
  -7   4  -5   66.29    4.50
 -10  -5   5  221.98   21.30
  10  -5  -5  273.57   11.70
 -10   5   5  277.77   13.30
  10   5  -5  262.77   11.80
  10   5  -5  270.77   12.40
  -9  -5   5  257.87   27.40
   9  -5  -5  271.47   14.00
  -9   5   5  276.47   13.10
   9   5  -5  302.07   13.20
   9   5  -5  282.27   13.20
  -9   5   5  288.17   14.00
  -9   5   5  282.77   12.80
   9   5  -5  293.57   13.20
  -8  -5   5  277.07   30.90
   8  -5  -5  297.37   15.20
  -8   5   5  287.67   14.10
  -8   5   5  289.37   13.60
  -8   5   5  298.57   13.90
   8   5  -5  280.47   13.50
   8   5  -5  276.87   13.50
   8   5  -5  281.87   15.30
  -8   5   5  275.07   14.50
  -7  -5   5   97.79   18.90
   7  -5  -5   97.09    6.30
   7  -5  -5  107.39    7.70
  -7   5   5  103.29    7.30
  -7   5   5   99.09    6.70
  -7   5   5  100.99    7.20
   7   5  -5   97.89    6.00
   7   5  -5   99.89    6.40
   7   5  -5  100.39    6.40
  -7   5   5  106.29    6.40
   6  -5  -5  665.83   31.30
  -6  -5   5  675.93   55.59
   6  -5  -5  618.34   39.70
  -6   5   5  654.63   29.40
   6   5  -5  678.43   28.90
   6   5  -5  698.53   28.50
  -6   5   5  679.43   29.60
  -6   5   5  649.54   30.40
  -6   5   5  659.93   29.20
   5  -5  -5  443.16   30.80
  -5  -5   5  466.05   24.50
  -5  -5   5  433.96   28.30
  -5  -5   5  519.05   46.10
   5  -5  -5  519.05   24.20
   5  -5  -5  474.25   22.00
   5   5  -5  477.95   21.00
  -5   5   5  439.56   22.70
  -5   5   5  473.65   21.70
  -5   5   5  490.15   22.00
   5   5  -5  486.55   20.60
  -4  -5   5  131.59   21.80
  -4  -5   5  129.29    8.50
   4  -5  -5  121.59    8.80
   4  -5  -5  111.29    7.30
  -4  -5   5  111.79    9.50
  -4  -5   5  109.99   11.70
  -4   5   5  120.39   10.30
   4   5  -5  120.79    6.20
  -4   5   5  115.49    7.30
  -4   5   5  116.09    7.30
  -4   5   5  115.89    8.00
  -4   5   5  112.19    7.00
  -3  -5   5   28.70    5.30
  -3  -5   5   24.00    4.30
  -3  -5   5   33.00   11.00
   3  -5  -5   28.20    7.60
  -3  -5   5   19.00    5.20
   3  -5  -5   30.30    4.30
   3  -5  -5   28.70    3.40
  -3  -5   5   22.90    7.80
  -3   5   5   28.70    3.90
  -3   5   5   33.10    3.40
  -3   5   5   28.80    3.30
  -3   5   5   33.30    5.70
  -3   5   5   29.80    3.10
   3   5  -5   28.70    2.50
   2  -5  -5  317.97   23.60
  -2  -5   5  339.87   34.50
  -2  -5   5  298.07   18.50
  -2  -5   5  328.27   17.90
  -2  -5   5  313.27   22.20
   2  -5  -5  316.77   15.60
  -2  -5   5  300.17   20.30
  -2   5   5  319.87   18.90
  -2   5   5  314.07   16.70
  -2   5   5  322.47   15.20
   2   5  -5  311.27   13.90
  -2   5   5  291.77   15.10
  -2   5   5  298.97   15.00
   1  -5  -5  824.32   35.40
  -1  -5   5  818.62   39.30
  -1  -5   5  817.52   43.70
  -1  -5   5  802.72   58.69
   1  -5  -5  829.52   45.50
  -1  -5   5  841.42   38.60
  -1   5   5  810.32   35.00
  -1   5   5  808.72   35.10
   1   5  -5  796.52   33.90
  -1   5   5  794.02   36.60
  -1   5   5  811.52   38.90
  -1   5   5  775.02   34.90
  -1   5   5  809.12   48.40
   0  -5   5  276.67   21.80
   0  -5   5  277.17   17.30
   0  -5   5  291.47   31.90
   0  -5   5  286.57   14.50
   0  -5  -5  244.68   25.10
   0  -5   5  271.77   16.50
   0  -5  -5  296.37   14.20
   0   5   5  270.57   15.20
   0   5   5  287.57   14.00
   0   5   5  263.17   13.80
   0   5   5  276.77   17.30
   0   5  -5  279.17   13.50
   1  -5   5   28.60    4.50
   1  -5   5   21.50    3.50
   1  -5   5   28.80    9.80
   1  -5   5   16.80    7.70
   1  -5   5   34.80    5.00
  -1  -5  -5   30.80    3.30
  -1  -5  -5   42.10    9.40
   1   5   5   28.30    3.20
   1   5   5   28.70    5.70
  -1   5  -5   24.40    3.40
   1   5   5   32.60    4.00
   1   5   5   25.30    3.30
   1   5   5   25.80    3.30
  -1   5  -5   35.80    4.60
  -2  -5  -5    0.80    5.20
   2  -5   5    1.00    3.60
   2  -5   5    3.20    1.60
   2  -5   5   -6.50    6.00
  -2   5  -5    3.90    2.00
   2   5   5    7.90    4.00
   2   5   5   -0.30    1.20
   2   5   5    2.20    1.40
   2   5   5    1.10    2.20
   3  -5   5  252.77   15.10
   3  -5   5  245.58   15.20
   3  -5   5  254.67   13.70
   3   5   5  247.78   12.50
   3   5   5  246.48   14.00
   3   5   5  242.98   12.90
  -3   5  -5  240.18   13.20
  -3   5  -5  241.68   13.10
  -3   5  -5  248.08   13.40
   3   5   5  264.47   13.20
   4  -5   5   51.79    5.50
   4  -5   5   64.09    5.30
   4  -5   5   61.19    5.80
   4   5   5   67.59    5.70
  -4   5  -5   62.59    5.20
  -4   5  -5   58.49    5.30
  -4   5  -5   60.49    5.20
   4   5   5   62.09    4.50
   4   5   5   60.49    6.80
   5  -5   5  351.06   19.80
   5  -5   5  361.66   17.90
   5  -5   5  355.66   17.70
   5   5   5  397.16   18.60
   5   5   5  382.36   16.80
   5   5   5  372.76   17.20
  -5   5  -5  378.16   21.40
  -5   5  -5  381.96   17.90
   5   5   5  356.76   17.10
  -5   5  -5  372.96   17.80
  -6  -5  -5   72.09    4.30
   6  -5   5   66.09    4.50
  -6   5  -5   66.59    4.40
   6   5   5   63.19    4.80
   6   5   5   65.79    3.70
   6   5   5   58.79    3.90
  -6   5  -5   63.79    4.60
  -6   5  -5   60.39    4.50
  -9   6   5  262.27   12.10
  -9   6   5  260.27   11.30
  -8  -6   5   25.90    7.80
  -8   6   5   40.80    3.20
   8   6  -5   36.60    3.00
  -8   6   5   31.60    3.30
  -8   6   5   37.70    2.80
   8   6  -5   36.10    2.80
  -7  -6   5   42.30   11.20
   7  -6  -5   39.80    3.40
   7   6  -5   38.20    3.30
   7   6  -5   32.20    4.30
  -7   6   5   47.00    5.00
  -7   6   5   44.80    4.00
  -7   6   5   41.00    3.30
  -7   6   5   42.60    3.70
   7   6  -5   42.10    3.50
   6  -6  -5   56.09    4.30
  -6  -6   5   58.99   13.70
   6  -6  -5   56.19    4.70
  -6   6   5   66.59    5.00
  -6   6   5   60.79    5.00
  -6   6   5   60.29    4.70
   6   6  -5   60.59    4.10
  -6   6   5   67.99    4.60
   5  -6  -5   73.49    5.20
  -5  -6   5   64.39   14.90
   5   6  -5   72.29    4.50
  -5   6   5   76.99    5.50
  -5   6   5   83.79    5.70
  -5   6   5   65.69    5.00
  -5   6   5   76.09    6.00
  -4  -6   5  805.22   36.10
  -4  -6   5  778.22   37.30
   4  -6  -5  813.42   35.30
  -4  -6   5  805.22   59.49
  -4   6   5  826.82   36.50
  -4   6   5  798.02   35.10
  -4   6   5  868.61   35.40
   4   6  -5  799.22   34.80
  -4   6   5  806.62   34.90
  -3  -6   5  769.42   58.79
  -3  -6   5  847.82   42.20
   3  -6  -5  821.12   37.10
   3  -6  -5  659.73   37.60
  -3   6   5  813.12   34.40
  -3   6   5  823.12   34.30
   2  -6  -5  523.35   23.30
  -2  -6   5  484.15   25.10
  -2  -6   5  489.45   43.10
   2  -6  -5  444.96   24.10
  -2  -6   5  548.95   26.70
  -2   6   5  514.75   23.10
  -2   6   5  496.45   23.00
  -2   6   5  500.75   22.90
  -2   6   5  549.95   28.60
  -1  -6   5  486.15   25.90
  -1  -6   5  509.65   25.40
   1  -6  -5  487.85   22.60
  -1  -6   5  534.45   44.30
   1  -6  -5  449.56   22.30
  -1   6   5  454.85   22.60
  -1   6   5  523.45   22.70
  -1   6   5  498.05   22.60
   0  -6   5  176.68    9.50
   0  -6   5  136.69   14.60
   0  -6   5  161.38   23.30
   0   6   5  168.38   10.40
   0   6   5  165.18    9.40
   0   6  -5  164.88    9.00
   0   6   5  162.78    9.50
   0   6   5  174.28    9.50
   1  -6   5  197.08   13.60
   1  -6   5  208.68   11.50
   1  -6   5  207.98   13.50
  -1  -6  -5  202.78   11.10
   1   6   5  232.68   11.70
   1   6   5  218.88   11.50
   1   6   5  218.68   12.40
   1   6   5  220.88   11.30
  -1   6  -5  219.68   12.00
   2  -6   5    1.70    1.60
   2  -6   5    4.90    1.50
   2  -6   5    3.60    2.00
   2   6   5    2.00    1.70
  -2   6  -5    7.20    2.50
   2   6   5    5.10    1.60
   2   6   5    1.90    1.50
  -2   6  -5    6.10    2.10
   2   6   5    4.70    1.90
   3  -6   5  263.57   15.00
   3  -6   5  283.47   13.60
   3  -6   5  258.97   14.70
  -3   6  -5  252.87   13.40
   3   6   5  272.27   14.30
   3   6   5  265.67   12.80
  -3   6  -5  263.37   13.30
  -3   6  -5  252.87   15.90
   3   6   5  267.37   14.20
   3   6   5  269.67   13.20
   4  -6   5  215.58   10.40
   4  -6   5  198.68   11.20
   4  -6   5  177.48   10.50
   4   6   5  195.08   10.00
   4   6   5  192.98   10.10
   4   6   5  194.68   10.50
  -4   6  -5  203.18   10.50
   4   6   5  197.08    9.70
   5  -6   5   13.50    2.30
   5  -6   5   15.00    2.10
   5  -6   5   16.50    2.20
  -5   6  -5   18.40    2.50
  -5   6  -5   11.00    1.90
   5   6   5   15.40    2.00
   5   6   5   10.30    1.90
   5   6   5   17.50    2.30
  -7   7   5   75.09    4.60
  -7   7   5   80.89    4.40
   6  -7  -5   48.00    3.40
  -6  -7   5   42.20    9.20
  -6   7   5   46.90    3.80
  -6   7   5   45.70    3.90
  -6   7   5   47.20    3.40
  -6   7   5   48.50    4.10
   5  -7  -5    3.40    1.00
  -5  -7   5    1.60    3.00
  -5   7   5    4.50    1.40
  -5   7   5    6.10    1.50
  -5   7   5    0.10    1.70
  -5   7   5    3.50    1.50
  -4  -7   5   46.10   10.70
   4  -7  -5   44.00    3.80
  -4   7   5   46.60    3.80
  -4   7   5   46.50    4.00
  -4   7   5   44.20    4.00
  -4   7   5   56.29    4.60
  -3  -7   5   47.20   10.70
  -3  -7   5   55.59    4.90
  -3  -7   5   40.90    4.80
   3  -7  -5   46.20    3.90
  -3   7   5   48.90    4.60
  -3   7   5   52.49    3.90
  -3   7   5   49.90    4.80
  -3   7   5   48.10    4.10
  -2  -7   5  290.57   15.40
  -2  -7   5  276.87   27.90
   2  -7  -5  302.97   14.30
  -2  -7   5  288.27   15.80
  -2   7   5  293.37   15.00
  -2   7   5  337.07   17.90
  -2   7   5  282.97   14.30
  -2   7   5  294.57   14.10
  -1  -7   5  110.89    8.40
  -1  -7   5   96.69   15.20
  -1  -7   5  102.89    7.70
   1  -7  -5   97.19    6.30
  -1   7   5  111.49    6.80
  -1   7   5  106.09    6.40
  -1   7   5  109.19    8.80
  -1   7   5  123.79    7.60
   0  -7  -5  317.07   15.00
   0  -7   5  304.97   17.00
   0  -7   5  292.77   29.70
   0  -7   5  321.27   16.90
   0   7   5  326.67   15.10
   0   7   5  329.77   15.40
   0   7   5  330.67   15.90
   0   7   5  334.87   15.40
   1  -7   5   53.29    4.90
   1  -7   5   53.49    5.20
   1   7   5   50.09    4.10
   1   7   5   47.30    3.70
   1   7   5   52.69    4.90
   1   7   5   51.69    4.50
   2  -7   5   69.59    5.60
   2  -7   5   70.49    5.40
   2  -7   5   68.59    4.50
   2   7   5   64.39    4.70
   2   7   5   64.39    5.10
   2   7   5   61.89    4.30
   2   7   5   74.49    4.80
   3  -7   5   93.89    5.10
   3  -7   5   91.89    6.30
   3  -7   5  100.49    7.00
   3   7   5  102.19    6.30
   3   7   5   96.19    5.50
   4  -8  -5  239.88   10.60
  -4   8   5  225.18   10.80
  -4   8   5  266.77   12.10
   3  -8  -5   92.69    5.50
  -3   8   5   94.49    5.10
  -3   8   5   94.49    5.40
   2  -8  -5  244.08   11.10
  -2   8   5  243.68   11.30
  -2   8   5  241.68   11.40
  -1  -8   5  245.78   11.80
  -1   8   5  237.48   11.20
  -1   8   5  237.08   11.00
   0  -8   5   48.90    3.50
   0  -8   5   50.49    3.80
   0   8   5   45.00    4.10
   0   8   5   52.69    3.20
   1  -8   5   72.49    4.60
   1  -8   5   78.79    4.60
   1   8   5   74.99    4.10
  12   0  -6  245.18   12.50
 -12   0   6  259.87   12.30
 -11   0   6  359.66   17.40
  11   0  -6  350.46   19.30
  11   0  -6  334.57   16.80
 -10   0   6   22.90    3.10
 -10   0   6   20.80    3.30
  10   0  -6   21.10    2.70
  10   0  -6   25.90    3.40
  10   0  -6   16.90    3.00
  10   0  -6   25.20    4.50
   9   0  -6   62.89    5.30
   9   0  -6   69.79    6.70
   9   0  -6   66.19    5.70
  -9   0   6   64.39   14.50
  -9   0   6   65.19    5.00
   9   0  -6   57.09    5.60
  -9   0   6   63.89    5.90
   9   0  -6   55.39    4.60
   8   0  -6 3292.87  134.69
  -8   0   6 3366.96  159.28
   8   0  -6 3331.17  134.69
   8   0  -6 3234.38  135.99
   8   0  -6 3360.86  138.19
  -8   0   6 3449.05  151.18
   8   0  -6 3240.88  137.79
  -8   0   6 3312.37  135.09
  -8   0   6 3388.16  136.69
   7   0  -6   29.00    3.70
  -7   0   6   21.60    7.70
   7   0  -6   27.70    3.30
   7   0  -6   28.60    3.40
   7   0  -6   26.00    5.00
  -7   0   6   21.40    3.50
   7   0  -6   22.80    2.90
  -7   0   6   28.80    3.40
  -6   0   6  402.56   19.80
   6   0  -6  412.46   18.60
  -6   0   6  388.76   18.80
   6   0  -6  425.26   18.40
   6   0  -6  337.47   20.40
  -6   0   6  402.96   19.30
   6   0  -6  400.16   19.50
  -6   0   6  415.66   27.40
   6   0  -6  386.26   18.30
  -5   0   6  106.49    7.50
   5   0  -6  109.09    6.60
  -5   0   6  113.99    7.40
  -5   0   6  109.39   11.70
   5   0  -6  102.49    7.20
   5   0  -6  111.19    6.50
   5   0  -6  100.79    6.50
  -4   0   6  399.96   25.60
  -4   0   6  424.76   20.40
   4   0  -6  440.66   19.10
   4   0  -6  430.26   19.30
   3   0  -6  562.24   34.50
  -3   0   6  546.65   25.60
  -3   0   6  591.84   24.10
  -3   0   6  582.84   26.60
   3   0  -6  573.24   25.20
   3   0  -6  590.14   25.00
   2   0  -6 2860.81  115.29
   2   0  -6 2670.33  126.19
  -2   0   6 2867.31  114.89
   2   0  -6 2830.32  115.49
  -2   0   6 3068.39  117.59
  -1   0   6  814.62   32.80
   1   0  -6  741.33   32.90
   1   0  -6  705.33   42.30
  -1   0   6  753.72   34.70
   1   0  -6  801.62   32.90
   0   0  -6  333.77   16.00
   0   0   6  341.37   16.20
   0   0  -6  346.77   16.30
   0   0  -6  318.97   25.20
   1   0   6  504.95   28.40
  -1   0  -6  621.64   31.30
  -1   0  -6  506.95   36.80
  -1   0  -6  632.64   26.20
   1   0   6  625.44   27.10
   1   0   6  554.54   26.10
  -2   0  -6  578.84   25.50
  -2   0  -6  552.54   25.30
  -2   0  -6  532.25   26.60
  -2   0  -6  537.35   25.40
   2   0   6  573.34   26.30
   2   0   6  534.85   27.10
   2   0   6  547.75   25.40
   3   0   6  519.35   24.80
  -3   0  -6  507.95   25.00
   3   0   6  551.94   26.50
  -3   0  -6  550.64   24.90
   3   0   6  532.85   27.00
  -3   0  -6  535.75   27.80
  -3   0  -6  524.65   24.70
  -4   0  -6 1041.60   46.20
  -4   0  -6 1053.19   45.80
   4   0   6 1072.49   46.20
   4   0   6 1050.49   48.80
  -4   0  -6 1085.79   48.00
   4   0   6 1066.69   48.90
  -4   0  -6 1104.99   46.30
  -5   0  -6  129.69    8.30
  -5   0  -6  139.99    8.10
   5   0   6  121.09    8.80
  -5   0  -6  133.09    9.60
   5   0   6  139.09   10.40
   6   0   6   38.50    4.80
   6   0   6   46.80    4.40
  -6   0  -6   41.10    4.50
  -6   0  -6   43.60    3.20
  -7   0  -6  424.56   21.20
  -7   0  -6  454.45   20.40
   7   0   6  416.86   21.10
  -8   0  -6  191.28   11.30
  -8   0  -6  224.88   10.50
   8   0   6  237.48   11.10
  12  -1  -6  122.29    7.30
 -12  -1   6  121.49    6.80
 -12   1   6  129.29    7.40
  12   1  -6  124.69    6.80
  11  -1  -6  142.99    9.40
 -11  -1   6  154.18    9.70
  11  -1  -6  157.78    8.70
  11   1  -6  126.69    8.70
  11   1  -6  151.08    7.50
  11   1  -6  160.38    9.50
 -11   1   6  140.49    9.30
 -11   1   6  158.88    9.50
  10  -1  -6   59.59    6.20
  10  -1  -6   59.49    5.00
 -10  -1   6   58.69    5.20
 -10   1   6   45.10    5.10
  10   1  -6   60.09    5.10
 -10   1   6   68.59    5.00
  10   1  -6   53.59    4.60
  10   1  -6   58.59    4.40
  10   1  -6   50.69    6.30
  -9  -1   6  287.37   29.30
  -9  -1   6  283.27   15.40
   9  -1  -6  271.27   15.20
  -9  -1   6  299.27   25.40
   9  -1  -6  306.17   13.70
   9  -1  -6  278.17   16.50
  -9   1   6  277.87   14.70
  -9   1   6  298.17   16.20
   9   1  -6  286.27   15.30
   9   1  -6  299.67   14.20
  -9   1   6  247.48   28.60
   9   1  -6  273.27   14.20
   9   1  -6  273.77   14.20
   8  -1  -6 2620.74  108.89
   8  -1  -6 2693.83  112.19
   8  -1  -6 2669.33  108.39
  -8  -1   6 2826.62  136.69
   8  -1  -6 2740.73  110.39
  -8  -1   6 2733.93  110.39
  -8   1   6 2559.34  110.79
   8   1  -6 2762.42  108.89
   8   1  -6 2693.63  108.69
  -8   1   6 2549.74  109.39
   8   1  -6 2665.13  109.99
  -8   1   6 2668.33  126.99
   8   1  -6 2556.24  108.49
  -7  -1   6 1851.31   84.39
  -7  -1   6 1935.81   98.69
   7  -1  -6 1760.12   72.49
   7  -1  -6 1767.82   72.39
  -7  -1   6 1731.03   73.69
   7  -1  -6 1794.22   72.19
   7  -1  -6 1753.32   75.39
   7  -1  -6 1784.12   73.89
   7   1  -6 1768.82   72.29
   7   1  -6 1674.53   73.19
  -7   1   6 1683.43   72.89
  -7   1   6 1704.53   70.99
   7   1  -6 1755.62   72.09
   7   1  -6 1724.53   72.09
  -7   1   6 1681.23   74.09
  -7   1   6 1642.74   73.89
  -7   1   6 1791.52   87.99
   6  -1  -6 1698.73   72.29
   6  -1  -6 1616.34   73.49
   6  -1  -6 1746.53   71.09
  -6  -1   6 1649.04   71.89
  -6  -1   6 1807.82   81.09
   6  -1  -6 1733.23   70.99
  -6  -1   6 1806.72   95.19
   6  -1  -6 1755.62   70.99
   6   1  -6 1679.03   71.39
   6   1  -6 1785.72   70.89
  -6   1   6 1783.52   70.19
   6   1  -6 1707.03   70.79
  -6   1   6 1772.12   70.09
   6   1  -6 1664.03   71.79
  -6   1   6 1724.53   72.79
  -6   1   6 1766.32   83.79
  -6   1   6 1637.14   72.49
  -6   1   6 1690.03   71.59
   5  -1  -6  218.78   11.10
   5  -1  -6  197.28   12.70
   5  -1  -6  219.38   11.00
  -5  -1   6  223.48   16.70
  -5  -1   6  222.78   11.80
  -5   1   6  208.08   11.10
  -5   1   6  208.68   10.20
  -5   1   6  197.18   17.60
  -5   1   6  213.58   10.40
   5   1  -6  200.78   10.60
  -5   1   6  199.78   12.00
  -5   1   6  206.98   12.10
   5   1  -6  203.28   11.50
   5   1  -6  224.28   10.50
   4  -1  -6  464.55   24.00
  -4  -1   6  555.14   28.20
   4  -1  -6  517.95   22.50
   4  -1  -6  509.65   22.60
   4  -1  -6  450.95   23.70
  -4   1   6  538.35   24.30
  -4   1   6  499.95   22.60
  -4   1   6  507.15   30.70
  -4   1   6  493.45   21.90
   4   1  -6  501.15   22.20
  -4   1   6  499.85   21.90
   4   1  -6  524.55   22.10
  -3  -1   6  249.48   13.80
   3  -1  -6  263.67   12.80
   3  -1  -6  254.87   12.60
   3  -1  -6  263.57   20.60
   3   1  -6  254.17   12.40
  -3   1   6  276.57   14.20
   3   1  -6  253.07   12.10
  -3   1   6  246.98   12.00
  -3   1   6  250.87   12.10
  -3   1   6  268.97   12.80
   2  -1  -6   55.39    8.60
  -2  -1   6   49.50    5.10
   2  -1  -6   39.70    3.80
   2  -1  -6   39.80    3.60
   2   1  -6   39.80    3.30
  -2   1   6   38.20    4.30
  -2   1   6   42.30    3.30
  -2   1   6   38.40    3.40
  -2   1   6   47.20    4.00
   2   1  -6   41.40    3.60
   1  -1  -6 2142.69   90.39
   1  -1  -6 2178.18  101.99
  -1  -1   6 2235.48   89.49
  -1  -1   6 2373.06   93.89
   1  -1  -6 2194.98   90.29
  -1   1   6 2289.57   92.49
   1   1  -6 2059.59   89.99
  -1   1   6 2170.38   89.49
  -1   1   6 2182.88   89.59
   1   1  -6 2195.28   89.89
  -1   1   6 2363.56   90.99
   0  -1  -6  858.11   35.30
   0  -1  -6  773.82   46.10
   0  -1   6  829.82   34.90
   0  -1  -6  819.82   35.00
   0  -1   6  778.62   36.40
   0  -1  -6  742.53   34.80
   0  -1  -6  757.52   36.20
   0   1  -6  839.42   35.20
   0   1   6  750.22   35.50
   0   1   6  843.62   37.30
   0   1   6  824.52   34.20
   0   1  -6  832.42   34.90
   0   1   6  885.41   36.00
  -1  -1  -6  351.96   16.60
   1  -1   6  315.67   17.10
   1  -1   6  323.87   16.30
  -1  -1  -6  336.87   16.00
  -1  -1  -6  305.27   16.90
  -1  -1  -6  324.87   15.80
  -1  -1  -6  303.47   25.60
   1   1   6  346.87   16.80
  -1   1  -6  326.67   16.00
   1   1   6  315.07   18.60
  -1   1  -6  305.97   17.20
  -1   1  -6  294.77   17.40
   1   1   6  298.37   14.90
  -1   1  -6  329.17   15.80
   1   1   6  333.17   15.10
   1   1   6  320.87   16.50
   1   1   6  314.47   14.80
   2  -1   6 1020.00   46.10
  -2  -1  -6  987.00   45.60
   2  -1   6 1008.40   52.09
  -2  -1  -6 1031.50   44.20
  -2  -1  -6 1062.59   44.10
   2  -1   6 1069.89   45.80
  -2  -1  -6 1041.00   44.10
  -2  -1  -6  986.10   59.69
   2   1   6 1066.39   42.90
   2   1   6  997.40   46.70
  -2   1  -6 1049.20   44.50
  -2   1  -6 1031.50   44.60
   2   1   6 1016.40   44.80
  -2   1  -6 1039.20   46.00
   2   1   6 1049.79   43.30
  -2   1  -6 1005.90   44.50
   2   1   6 1053.19   45.70
   3  -1   6  148.69   10.60
  -3  -1  -6  141.69    8.80
  -3  -1  -6  122.49   19.90
  -3  -1  -6  138.79   11.60
   3  -1   6  133.19   10.20
   3  -1   6  122.49    7.90
  -3  -1  -6  131.09    8.40
   3   1   6  134.69    7.10
   3   1   6  160.78   13.10
  -3   1  -6  132.59    8.80
  -3   1  -6  113.99   11.20
  -3   1  -6  136.99    8.70
   3   1   6  113.69   11.10
   3   1   6  135.99   11.10
  -4  -1  -6  521.25   25.60
   4  -1   6  512.25   27.20
  -4  -1  -6  514.55   23.00
   4  -1   6  495.25   23.30
   4  -1   6  499.85   26.20
   4  -1   6  506.25   30.50
   4   1   6  539.65   24.80
   4   1   6  492.95   26.60
   4   1   6  518.75   26.40
  -4   1  -6  539.05   26.10
  -4   1  -6  532.05   24.60
  -4   1  -6  506.95   24.20
   4   1   6  512.35   21.90
  -4   1  -6  510.05   24.40
  -5  -1  -6  351.86   23.60
   5  -1   6  405.56   22.20
  -5   1  -6  431.46   21.80
   5   1   6  403.56   22.90
  -5   1  -6  362.26   18.60
  -5   1  -6  337.67   18.50
  -5   1  -6  356.76   18.50
  -6  -1  -6   62.19    5.50
   6  -1   6   58.59    5.70
   6  -1   6   61.19    5.50
  -6   1  -6   65.59    7.30
  -6   1  -6   58.39    5.10
  -6   1  -6   61.89    4.50
   6   1   6   63.29    4.90
   6   1   6   58.19    6.10
  -6   1  -6   58.99    5.60
   7  -1   6   47.70    4.50
  -7  -1  -6   47.90    3.80
  -7  -1  -6   47.40    4.50
  -7   1  -6   51.79    4.40
   7   1   6   40.00    4.30
  -7   1  -6   39.20    4.60
   7   1   6   50.19    3.80
 -11  -2   6  277.27   13.10
  11  -2  -6  282.67   14.50
  11   2  -6  264.07   12.40
 -11   2   6  263.97   14.00
  11   2  -6  261.87   13.40
  11   2  -6  272.77   12.70
 -11   2   6  272.37   12.80
 -10  -2   6  310.97   15.40
  10  -2  -6  299.27   16.80
  10  -2  -6  300.67   15.10
 -10  -2   6  250.37   27.20
  10   2  -6  308.17   14.50
  10   2  -6  360.76   16.90
  10   2  -6  304.67   15.60
  10   2  -6  309.77   14.80
 -10   2   6  301.67   16.30
 -10   2   6  305.27   15.20
   9  -2  -6  926.81   40.70
   9  -2  -6  919.21   42.60
  -9  -2   6  948.21   63.29
  -9  -2   6  963.20   41.10
  -9   2   6  885.41   37.90
   9   2  -6  913.31   39.60
   9   2  -6  925.11   39.60
  -9   2   6  958.60   41.70
   9   2  -6  905.91   40.80
  -9   2   6  899.21   41.80
  -8  -2   6  415.16   38.90
  -8  -2   6  413.26   27.90
  -8  -2   6  450.75   20.70
   8  -2  -6  427.26   20.70
   8  -2  -6  418.66   22.30
   8   2  -6  392.76   19.30
   8   2  -6  411.86   20.40
   8   2  -6  418.76   19.40
  -8   2   6  382.56   21.20
  -8   2   6  426.36   18.90
  -8   2   6  403.96   18.60
   8   2  -6  426.46   19.50
  -8   2   6  417.96   20.50
   7  -2  -6 1001.60   41.90
  -7  -2   6 1042.40   52.19
  -7  -2   6 1037.70   67.79
  -7  -2   6 1002.70   43.80
   7  -2  -6  968.90   44.10
   7  -2  -6  970.70   45.70
   7   2  -6 1072.09   45.50
   7   2  -6  969.10   42.70
  -7   2   6  969.90   46.00
  -7   2   6  992.00   43.90
  -7   2   6 1022.90   42.50
  -7   2   6  943.91   42.50
   7   2  -6 1045.80   42.80
   7   2  -6 1007.40   42.50
  -7   2   6 1029.60   42.30
  -7   2   6 1044.40   51.79
  -6  -2   6  417.66   22.80
   6  -2  -6  415.26   18.90
   6  -2  -6  413.16   20.60
  -6  -2   6  450.65   20.40
  -6  -2   6  423.06   26.10
   6  -2  -6  419.66   22.00
  -6   2   6  417.46   20.20
   6   2  -6  403.96   19.30
  -6   2   6  419.36   19.30
  -6   2   6  411.96   21.70
   6   2  -6  388.76   20.00
   6   2  -6  432.86   19.00
  -6   2   6  410.86   21.40
  -6   2   6  508.75   33.90
   6   2  -6  417.96   19.10
  -6   2   6  414.86   19.10
  -6   2   6  408.46   18.90
   5  -2  -6   67.79    5.90
   5  -2  -6   74.89    6.70
  -5  -2   6   71.69    5.60
   5  -2  -6   66.49    5.80
  -5  -2   6   86.99   15.60
  -5  -2   6   60.59    8.50
  -5   2   6   83.39    7.00
  -5   2   6   87.19    5.20
  -5   2   6   74.99   11.20
  -5   2   6   89.59    6.20
   5   2  -6   69.79    4.90
  -5   2   6   77.09    5.10
   5   2  -6   71.19    4.70
  -5   2   6   63.09    9.00
   5   2  -6   68.79    5.80
   5   2  -6   68.29    5.00
  -5   2   6   77.79    5.20
  -4  -2   6   11.60    3.00
   4  -2  -6   22.80    2.90
   4  -2  -6   16.60    4.00
   4  -2  -6   11.40    3.00
   4  -2  -6   19.30    3.20
  -4  -2   6   17.70    2.80
   4  -2  -6   24.60    3.60
  -4   2   6   15.10    2.30
  -4   2   6   18.00    3.40
   4   2  -6   15.50    2.00
  -4   2   6   23.50    4.10
   4   2  -6   13.10    2.20
  -4   2   6   14.80    2.40
   3  -2  -6  222.28   13.70
   3  -2  -6  217.78   12.10
  -3  -2   6  240.28   14.40
   3  -2  -6  253.87   20.50
   3  -2  -6  232.48   13.20
  -3  -2   6  266.47   26.90
   3  -2  -6  238.68   12.30
  -3   2   6  259.07   14.00
  -3   2   6  223.48   12.60
  -3   2   6  266.97   13.40
   3   2  -6  236.58   11.70
  -3   2   6  255.17   11.80
  -3   2   6  244.08   11.70
  -3   2   6  255.57   11.90
   3   2  -6  239.18   11.40
   2  -2  -6  853.91   47.00
  -2  -2   6  933.01   59.59
   2  -2  -6  848.52   38.30
  -2  -2   6  874.91   40.20
   2  -2  -6  823.12   39.00
   2  -2  -6  814.22   36.20
  -2   2   6  839.02   38.20
  -2   2   6  876.31   35.90
  -2   2   6  870.91   35.90
  -2   2   6  886.21   37.50
  -2   2   6  792.52   37.00
  -2   2   6  786.32   35.60
   2   2  -6  833.12   35.90
   2   2  -6  871.71   35.70
   1  -2  -6  979.30   44.50
   1  -2  -6 1014.80   45.90
  -1  -2   6 1027.30   46.30
   1  -2  -6  969.50   42.90
   1  -2  -6  990.90   54.09
  -1  -2   6  971.00   44.10
  -1  -2   6 1080.29   51.29
  -1  -2   6 1139.29   65.69
  -1  -2   6 1094.99   45.30
   1   2  -6 1035.50   42.60
  -1   2   6  992.30   42.60
  -1   2   6  933.91   42.30
  -1   2   6  967.20   43.90
  -1   2   6 1050.79   45.40
   1   2  -6 1027.90   42.90
  -1   2   6 1028.20   42.60
   0  -2   6  307.17   18.80
   0  -2   6  271.77   17.00
   0  -2   6  290.87   19.50
   0  -2   6  336.37   31.50
   0  -2  -6  288.17   14.10
   0  -2  -6  294.67   14.30
   0  -2  -6  291.07   23.50
   0   2   6  306.97   15.70
   0   2   6  266.67   17.50
   0   2  -6  294.87   14.50
   0   2   6  263.97   16.00
   0   2   6  290.27   13.90
   0   2  -6  316.27   14.40
   0   2   6  279.37   15.20
   0   2   6  285.47   13.90
  -1  -2  -6  262.47   14.60
   1  -2   6  247.28   15.20
  -1  -2  -6  254.57   22.70
  -1  -2  -6  256.57   14.30
   1  -2   6  286.17   29.30
   1  -2   6  274.27   18.00
   1  -2   6  269.77   14.50
   1   2   6  257.37   12.50
   1   2   6  253.67   12.70
  -1   2  -6  238.98   15.20
  -1   2  -6  305.27   14.00
   1   2   6  247.78   15.40
   1   2   6  256.47   14.60
   1   2   6  253.77   16.10
   1   2   6  250.77   12.70
   1   2   6  253.77   14.10
   2  -2   6  337.87   19.40
  -2  -2  -6  333.97   18.70
   2  -2   6  382.26   23.60
   2  -2   6  370.66   19.50
  -2  -2  -6  361.16   30.00
   2  -2   6  389.46   35.20
  -2  -2  -6  344.57   16.50
   2  -2   6  366.56   19.10
  -2   2  -6  366.96   19.40
  -2   2  -6  366.86   17.90
   2   2   6  367.26   20.70
  -2   2  -6  368.16   18.20
   2   2   6  372.66   16.80
   2   2   6  370.46   18.60
   2   2   6  376.86   17.10
   2   2   6  368.66   19.40
  -2   2  -6  334.27   17.90
   3  -2   6  112.99   12.40
   3  -2   6  124.49    9.10
  -3  -2  -6  114.79   24.80
   3  -2   6  107.19    9.00
   3  -2   6  123.99    9.10
  -3  -2  -6  113.59    8.70
   3   2   6  119.29    9.40
   3   2   6  126.09    7.50
   3   2   6  120.29    6.90
   3   2   6  118.19    9.90
  -3   2  -6  119.29    8.10
   3   2   6  129.29    8.60
  -3   2  -6  119.09    9.00
  -3   2  -6  121.39    8.10
   3   2   6  115.19    7.20
  -4  -2  -6  238.28   25.70
   4  -2   6  221.38   13.70
   4  -2   6  190.48   12.40
   4  -2   6  219.18   13.40
  -4  -2  -6  214.08   12.90
   4  -2   6  218.28   20.20
   4   2   6  242.38   16.30
  -4   2  -6  211.18   12.40
  -4   2  -6  223.58   12.70
   4   2   6  209.38   14.40
   4   2   6  228.58   10.80
  -4   2  -6  228.48   12.50
  -4   2  -6  216.38   13.60
  -5  -2  -6  382.46   19.40
   5  -2   6  395.66   20.50
   5  -2   6  383.26   19.90
   5   2   6  386.16   19.40
   5   2   6  374.46   21.40
  -5   2  -6  391.16   19.00
  -5   2  -6  389.56   19.30
  -5   2  -6  391.96   20.40
   5   2   6  393.46   17.00
  -5   2  -6  397.26   19.30
   6  -2   6   57.29    5.20
   6  -2   6   49.40    4.90
  -6  -2  -6   54.59    6.20
  -6   2  -6   58.19    4.40
   6   2   6   52.69    4.50
  -6   2  -6   55.69    5.30
  -6   2  -6   51.99    5.60
   6   2   6   55.99    5.90
  -6   2  -6   56.79    4.80
   7  -2   6  211.48   11.40
  -7  -2  -6  216.38   12.10
  -7   2  -6  232.88   11.10
  -7   2  -6  214.68   11.60
   7   2   6  239.58   13.00
  11  -3  -6   67.49    5.40
  11   3  -6   67.09    4.20
  11   3  -6   62.69    4.20
 -11   3   6   64.09    5.20
 -11   3   6   67.69    4.60
  11   3  -6   68.39    4.60
  10  -3  -6  182.78   11.20
 -10  -3   6  192.18    9.50
 -10  -3   6  165.58   21.90
 -10   3   6  208.58   11.60
  10   3  -6  185.88    9.80
 -10   3   6  174.08   10.00
  10   3  -6  175.48    9.40
  10   3  -6  187.48    9.70
   9  -3  -6 1341.97   57.99
   9  -3  -6 1284.87   55.19
  -9  -3   6 1132.29   77.49
  -9  -3   6 1349.36   55.39
  -9   3   6 1359.56   54.19
  -9   3   6 1208.78   54.19
   9   3  -6 1322.57   56.09
   9   3  -6 1373.96   55.19
   9   3  -6 1433.96   55.39
   9   3  -6 1431.36   56.39
  -9   3   6 1323.97   57.79
  -9   3   6 1302.37   56.19
   8  -3  -6    6.80    2.30
   8  -3  -6    5.20    2.10
  -8  -3   6    6.80    1.80
  -8  -3   6    6.90    6.60
  -8   3   6   10.00    2.70
  -8   3   6    3.60    2.40
   8   3  -6    8.70    2.10
  -8   3   6    8.50    1.90
  -8   3   6   11.10    2.50
  -8   3   6    7.30    1.60
   8   3  -6    6.40    1.70
   8   3  -6    7.00    1.80
   8   3  -6   10.50    2.10
  -7  -3   6  385.36   21.90
   7  -3  -6  421.06   20.10
  -7  -3   6  442.36   41.40
   7  -3  -6  414.46   21.70
  -7  -3   6  417.96   19.30
  -7  -3   6  359.36   24.40
   7   3  -6  399.66   18.90
   7   3  -6  410.86   18.60
   7   3  -6  401.16   19.80
   7   3  -6  424.66   18.80
  -7   3   6  403.06   18.60
  -7   3   6  409.26   18.90
  -7   3   6  368.56   21.00
  -7   3   6  394.36   19.90
  -7   3   6  403.26   19.10
   6  -3  -6  307.27   17.50
  -6  -3   6  316.97   20.20
  -6   3   6  320.17   16.30
  -6   3   6  315.97   17.90
  -6   3   6  330.37   15.10
   6   3  -6  303.47   14.80
  -6   3   6  322.17   15.40
  -6   3   6  315.67   18.70
   6   3  -6  289.87   15.80
   6   3  -6  298.97   15.00
   6   3  -6  316.27   14.60
  -6   3   6  314.37   15.20
  -5  -3   6  883.21   36.40
   5  -3  -6  837.22   37.40
   5  -3  -6  894.71   39.00
  -5  -3   6  807.22   40.90
  -5   3   6  819.32   37.00
  -5   3   6  848.42   35.90
   5   3  -6  844.12   35.40
  -5   3   6  864.71   35.80
  -5   3   6  794.92   38.70
   5   3  -6  866.21   35.20
   5   3  -6  776.62   35.80
  -5   3   6  843.32   39.30
   5   3  -6  802.22   37.30
  -4  -3   6  679.73   32.70
  -4  -3   6  648.24   28.90
   4  -3  -6  671.73   40.40
  -4  -3   6  612.74   31.50
  -4  -3   6  723.53   51.49
  -4  -3   6  648.14   32.60
  -4  -3   6  602.94   30.20
   4  -3  -6  632.64   29.90
   4  -3  -6  653.03   31.10
  -4   3   6  627.54   31.70
  -4   3   6  651.23   29.70
  -4   3   6  657.03   28.50
  -4   3   6  662.53   31.20
   4   3  -6  688.53   28.30
  -4   3   6  643.54   28.30
  -4   3   6  675.93   31.70
   4   3  -6  641.94   28.00
  -3  -3   6  395.06   21.10
  -3  -3   6  412.36   36.30
   3  -3  -6  381.76   19.70
  -3  -3   6  392.36   21.10
   3  -3  -6  375.56   19.20
  -3  -3   6  351.46   17.40
  -3  -3   6  383.76   21.60
  -3   3   6  369.66   18.40
   3   3  -6  341.37   16.60
  -3   3   6  375.06   17.10
  -3   3   6  346.37   19.10
  -3   3   6  359.16   17.10
  -3   3   6  350.76   19.50
   3   3  -6  355.66   16.40
  -3   3   6  371.16   17.00
   2  -3  -6   56.89    6.10
   2  -3  -6   61.19    9.80
  -2  -3   6   72.39    6.70
  -2  -3   6   61.79    6.80
  -2  -3   6   58.59    7.60
   2  -3  -6   63.99    4.50
  -2  -3   6   69.49   14.20
  -2  -3   6   51.89    4.80
  -2   3   6   64.09    6.30
   2   3  -6   64.89    4.30
  -2   3   6   67.89    6.10
   2   3  -6   60.19    4.60
  -2   3   6   67.39    4.70
  -2   3   6   65.19    4.60
  -2   3   6   60.59    4.60
  -2   3   6   57.29    5.40
  -1  -3   6 1746.93   90.29
  -1  -3   6 1592.04   69.19
  -1  -3   6 1468.65   64.79
   1  -3  -6 1436.06   63.59
  -1  -3   6 1470.85   65.99
  -1  -3   6 1519.95   64.59
  -1   3   6 1507.85   63.69
  -1   3   6 1402.96   61.79
  -1   3   6 1500.85   62.09
  -1   3   6 1467.45   64.39
   1   3  -6 1473.75   61.69
  -1   3   6 1426.26   64.89
  -1   3   6 1557.14   62.09
   1   3  -6 1476.15   62.09
   0  -3  -6  746.13   33.60
   0  -3   6  712.23   34.60
   0  -3   6  825.12   56.89
   0  -3   6  727.33   32.80
   0  -3   6  731.23   35.70
   0  -3   6  784.02   39.90
   0  -3  -6  742.93   44.70
   0   3   6  769.22   36.80
   0   3  -6  724.23   32.40
   0   3   6  742.83   32.20
   0   3   6  747.13   32.10
   0   3   6  698.33   35.90
   0   3   6  719.73   35.10
   0   3  -6  784.52   33.80
   0   3   6  724.93   32.00
   0   3   6  682.13   33.40
  -1  -3  -6  196.58   19.70
   1  -3   6  192.88   12.90
   1  -3   6  206.58   25.40
   1  -3   6  174.58   15.50
   1  -3   6  194.78   11.10
  -1  -3  -6  181.38   11.20
  -1  -3  -6  196.48   14.80
   1  -3   6  202.88   12.60
   1   3   6  186.18   12.20
   1   3   6  167.38   12.80
   1   3   6  192.88   10.20
  -1   3  -6  186.48   10.70
   1   3   6  185.18   12.90
  -1   3  -6  196.28   10.60
  -1   3  -6  165.58   10.80
   1   3   6  200.18   11.70
   1   3   6  202.48   10.40
   1   3   6  193.18   10.10
  -1   3  -6  169.68   11.70
  -2  -3  -6  230.28   23.20
   2  -3   6  218.68   14.40
   2  -3   6  220.58   18.40
   2  -3   6  231.18   13.10
   2  -3   6  240.98   14.40
  -2  -3  -6  209.28   19.80
  -2  -3  -6  226.28   15.00
   2  -3   6  244.08   27.50
  -2   3  -6  221.28   12.70
   2   3   6  240.58   12.10
   2   3   6  221.68   11.60
  -2   3  -6  241.98   14.10
   2   3   6  217.58   15.10
   2   3   6  224.88   13.20
   2   3   6  231.48   11.90
   2   3   6  236.28   14.50
  -2   3  -6  222.98   12.40
  -3  -3  -6  182.58   17.10
   3  -3   6  167.98   10.70
  -3  -3  -6  172.88   10.40
   3  -3   6  149.79   15.70
  -3  -3  -6  145.09   20.00
   3  -3   6  174.18   11.70
   3  -3   6  157.18   11.40
  -3   3  -6  182.38   10.70
   3   3   6  158.38   11.90
  -3   3  -6  182.18   11.50
   3   3   6  172.48    9.50
   3   3   6  176.48   10.90
   3   3   6  174.88    9.20
   3   3   6  159.08   12.30
  -3   3  -6  173.78   10.30
  -3   3  -6  164.58   10.20
  -4  -3  -6  274.17   14.10
   4  -3   6  282.27   18.40
   4  -3   6  245.38   17.40
   4  -3   6  320.07   22.10
   4   3   6  262.87   13.50
  -4   3  -6  272.37   16.60
   4   3   6  277.37   13.90
  -4   3  -6  267.67   14.60
   4   3   6  252.87   16.40
   4   3   6  255.37   15.60
   4   3   6  261.47   13.30
  -4   3  -6  265.57   14.50
   5  -3   6  253.07   13.60
   5  -3   6  242.78   13.40
   5  -3   6  230.18   13.80
   5   3   6  249.28   11.80
   5   3   6  242.98   15.30
  -5   3  -6  253.37   13.20
   5   3   6  257.67   11.70
  -5   3  -6  249.48   13.40
  -5   3  -6  265.97   14.50
   5   3   6  237.88   13.50
   6  -3   6  114.99    7.60
   6  -3   6  132.09    7.50
  -6   3  -6  121.89    7.80
   6   3   6  110.99    7.50
  -6   3  -6  127.79    7.70
  -6   3  -6  128.99    7.30
   6   3   6  113.59    8.40
  -6   3  -6  123.79    8.90
  -7  -3  -6   59.79    4.40
   7  -3   6   59.09    4.00
  -7   3  -6   58.79    4.30
  -7   3  -6   55.79    3.80
  10  -4  -6  785.22   33.20
  10   4  -6  781.02   31.60
  10   4  -6  646.44   32.60
  10   4  -6  750.62   33.20
  10   4  -6  723.73   31.70
 -10   4   6  802.02   32.50
  -9  -4   6   38.30   10.80
   9  -4  -6   41.10    4.70
  -9   4   6   42.50    3.90
   9   4  -6   42.90    3.60
  -9   4   6   40.60    4.10
   9   4  -6   48.50    3.90
   9   4  -6   44.70    3.80
  -9   4   6   44.10    3.30
   9   4  -6   48.40    4.30
  -8  -4   6  255.17   30.70
   8  -4  -6  283.57   15.80
  -8   4   6  270.37   13.50
   8   4  -6  275.77   14.20
   8   4  -6  265.87   13.30
   8   4  -6  274.87   13.30
   8   4  -6  276.47   13.40
  -8   4   6  281.97   13.20
  -8   4   6  285.17   14.70
  -8   4   6  257.37   13.60
   7  -4  -6  367.26   20.00
  -7  -4   6  371.86   38.20
  -7   4   6  383.16   17.60
   7   4  -6  371.86   17.20
  -7   4   6  378.96   18.90
  -7   4   6  370.96   17.80
   7   4  -6  384.36   17.50
  -7   4   6  382.86   18.00
   7   4  -6  342.27   21.20
   6  -4  -6  156.28   10.70
  -6  -4   6  154.68   23.90
  -6  -4   6  125.99   13.80
  -6  -4   6  149.09   11.10
  -6   4   6  150.68    9.60
   6   4  -6  152.98    8.60
   6   4  -6  158.18    8.20
   6   4  -6  151.28    8.30
  -6   4   6  156.08    8.90
  -6   4   6  151.08    8.50
  -6   4   6  147.49    8.90
   5  -4  -6  348.47   19.30
  -5  -4   6  364.46   22.60
   5  -4  -6  338.87   27.70
  -5  -4   6  351.76   20.30
  -5  -4   6  390.16   38.40
   5   4  -6  364.96   16.40
  -5   4   6  346.37   16.80
   5   4  -6  352.26   16.10
  -5   4   6  362.06   17.10
  -5   4   6  334.87   18.00
   4  -4  -6 1166.48   51.69
  -4  -4   6 1291.77   55.39
   4  -4  -6 1092.09   48.60
  -4  -4   6 1105.89   53.59
  -4  -4   6 1260.37   77.29
  -4  -4   6 1145.19   50.69
  -4  -4   6 1169.38   55.69
  -4   4   6 1135.89   48.70
   4   4  -6 1133.89   48.10
  -4   4   6 1212.78   49.00
  -4   4   6 1165.58   52.99
  -4   4   6 1175.58   49.00
  -4   4   6 1093.09   50.19
  -4   4   6 1161.98   52.89
   4   4  -6 1124.39   47.80
  -3  -4   6  873.41   44.20
   3  -4  -6  933.01   51.39
  -3  -4   6  845.42   43.20
  -3  -4   6  908.31   40.90
  -3  -4   6  892.31   43.80
   3  -4  -6  924.11   38.40
  -3   4   6  899.11   38.50
  -3   4   6  918.31   39.40
  -3   4   6  876.71   42.70
  -3   4   6  906.31   38.40
  -3   4   6  913.21   40.00
   3   4  -6  866.51   37.70
  -3   4   6  909.41   41.80
   3   4  -6  892.91   37.40
  -2  -4   6 1464.35   61.99
  -2  -4   6 1456.35   66.69
  -2  -4   6 1531.35   64.59
  -2  -4   6 1431.26   86.79
   2  -4  -6 1455.75   72.49
   2  -4  -6 1368.96   61.99
   2  -4  -6 1378.06   58.49
   2   4  -6 1447.56   57.89
  -2   4   6 1392.76   60.39
  -2   4   6 1307.87   61.59
  -2   4   6 1341.27   58.49
   2   4  -6 1349.96   58.19
  -2   4   6 1375.36   58.49
  -2   4   6 1449.55   58.79
  -1  -4   6  363.66   24.00
   1  -4  -6  367.46   17.00
   1  -4  -6  336.47   30.90
  -1  -4   6  325.47   44.40
  -1   4   6  366.66   18.80
  -1   4   6  388.96   22.00
  -1   4   6  356.16   17.20
   1   4  -6  351.46   17.00
  -1   4   6  367.96   17.20
   1   4  -6  367.76   16.70
   0  -4   6  504.85   25.50
   0  -4   6  527.25   44.40
   0  -4   6  492.05   30.40
   0  -4  -6  510.25   22.20
   0  -4   6  447.56   25.60
   0  -4   6  509.95   22.90
   0  -4  -6  451.95   33.80
   0   4   6  490.65   22.30
   0   4   6  467.65   22.30
   0   4   6  506.05   25.40
   0   4  -6  474.25   22.50
   0   4   6  449.86   25.60
   0   4   6  490.45   22.20
   0   4  -6  498.45   22.20
   0   4   6  462.25   23.70
   1  -4   6  492.65   30.80
   1  -4   6  530.25   43.50
   1  -4   6  472.75   22.40
  -1  -4  -6  482.35   35.50
   1  -4   6  480.35   24.80
   1  -4   6  450.65   25.10
  -1   4  -6  434.76   22.30
   1   4   6  455.85   23.20
  -1   4  -6  471.85   21.90
  -1   4  -6  453.15   22.50
   1   4   6  449.06   24.60
   1   4   6  466.75   21.60
   1   4   6  469.75   22.00
   1   4   6  489.95   22.00
   2  -4   6   70.09   11.70
  -2  -4  -6   72.99   13.10
   2  -4   6   74.79    7.60
   2  -4   6   82.89    5.30
   2  -4   6   73.99    7.40
   2  -4   6   84.59    6.40
   2   4   6   82.09    6.80
   2   4   6   66.79    7.70
  -2   4  -6   82.49    6.50
  -2   4  -6   93.79    6.60
  -2   4  -6   81.19    6.60
  -2   4  -6   85.09    7.50
   2   4   6   75.59    5.80
   2   4   6   87.39    6.10
   2   4   6   91.09    5.80
   3  -4   6   20.40    4.70
   3  -4   6   20.30    2.80
   3  -4   6   23.40    6.80
  -3  -4  -6    5.80    8.60
  -3   4  -6   20.90    3.70
  -3   4  -6   29.20    3.70
  -3   4  -6   21.50    5.30
   3   4   6   21.20    3.00
   3   4   6   21.60    5.10
  -3   4  -6   19.70    3.60
   4  -4   6   57.39    6.10
   4  -4   6   63.79    5.50
   4  -4   6   62.39    5.80
   4  -4   6   68.49    4.30
  -4   4  -6   60.49    5.90
  -4   4  -6   69.29    6.10
   4   4   6   58.49    5.10
  -4   4  -6   68.39    5.50
   4   4   6   67.69    4.50
   4   4   6   64.79    5.60
   5  -4   6    9.90    2.60
   5  -4   6   10.00    2.30
   5  -4   6   12.50    2.40
  -5   4  -6   15.10    2.70
  -5   4  -6    9.70    2.20
   5   4   6   13.90    2.40
   5   4   6   10.00    1.80
  -5   4  -6   11.60    2.30
  -5   4  -6   12.50    2.40
   5   4   6    9.50    1.60
   5   4   6    8.20    3.00
  -6  -4  -6   45.80    3.90
   6  -4   6   49.40    4.20
   6   4   6   51.89    4.00
  -6   4  -6   52.49    4.00
  -6   4  -6   48.40    3.90
  -6   4  -6   46.40    3.60
  10  -5  -6  274.37   12.60
  10   5  -6  286.37   12.70
 -10   5   6  299.97   13.30
  10   5  -6  299.57   13.30
   9  -5  -6   81.69    5.60
  -9   5   6   82.49    5.60
  -9   5   6   83.79    4.60
   9   5  -6   86.69    5.10
   9   5  -6   83.09    5.20
  -9   5   6   70.59    4.80
  -8  -5   6  165.48   22.50
   8  -5  -6  195.68   11.10
  -8   5   6  198.88    9.90
   8   5  -6  193.98    9.60
  -8   5   6  187.68   10.60
  -8   5   6  188.98    9.50
   8   5  -6  183.58    9.80
  -8   5   6  187.28   10.10
   8   5  -6  196.28    9.70
  -7  -5   6   45.80   12.60
   7  -5  -6   45.40    4.90
   7   5  -6   48.60    4.10
  -7   5   6   38.80    5.60
  -7   5   6   53.59    4.90
  -7   5   6   49.90    4.60
  -7   5   6   53.59    4.10
   7   5  -6   49.70    4.00
   7   5  -6   49.30    3.80
  -6  -5   6   21.30    9.50
   6  -5  -6   12.30    7.80
   6  -5  -6   22.30    3.00
   6  -5  -6   20.60    3.70
  -6  -5   6   30.60    4.90
   6   5  -6   24.00    2.70
  -6   5   6   27.50    3.00
   6   5  -6   23.00    2.90
  -6   5   6   18.80    2.90
  -6   5   6   22.50    3.30
  -6   5   6   20.80    3.40
   5  -5  -6 1331.77   73.09
   5  -5  -6 1486.45   62.39
  -5  -5   6 1646.34   73.79
  -5  -5   6 1464.75   90.89
   5  -5  -6 1496.45   64.19
  -5  -5   6 1522.05   65.29
   5   5  -6 1474.85   60.89
  -5   5   6 1497.15   61.79
   5   5  -6 1439.46   60.49
  -5   5   6 1470.95   63.19
  -5   5   6 1429.06   61.39
  -5   5   6 1510.95   61.79
  -4  -5   6  803.12   38.20
   4  -5  -6  764.92   33.90
   4  -5  -6  819.42   37.00
  -4  -5   6  801.42   35.70
  -4  -5   6  871.01   62.19
   4  -5  -6  785.82   46.00
  -4   5   6  785.32   35.60
   4   5  -6  766.42   33.00
  -4   5   6  802.72   34.30
   4   5  -6  749.92   33.30
  -4   5   6  802.32   34.10
  -4   5   6  660.63   38.90
  -4   5   6  789.52   34.30
  -3  -5   6  341.57   25.10
  -3  -5   6  382.26   22.30
   3  -5  -6  391.26   18.40
  -3  -5   6  402.66   39.10
  -3  -5   6  407.86   20.90
   3  -5  -6  425.86   29.60
  -3   5   6  387.86   18.60
   3   5  -6  395.66   17.70
  -3   5   6  378.76   18.70
  -3   5   6  400.66   22.60
  -3   5   6  400.46   18.50
  -3   5   6  396.26   20.10
  -2  -5   6  242.58   15.00
  -2  -5   6  232.48   15.90
   2  -5  -6  265.77   12.80
   2  -5  -6  251.97   22.10
  -2  -5   6  277.97   31.20
  -2  -5   6  236.28   19.80
  -2   5   6  228.28   12.90
  -2   5   6  247.88   16.20
  -2   5   6  253.77   13.00
   2   5  -6  259.97   12.20
  -2   5   6  237.88   12.60
  -2   5   6  253.27   14.20
  -1  -5   6  279.37   16.90
  -1  -5   6  309.57   22.10
  -1  -5   6  251.67   29.90
   1  -5  -6  245.28   12.80
   1  -5  -6  257.67   22.00
  -1  -5   6  256.57   15.60
   1   5  -6  247.78   12.50
  -1   5   6  236.58   16.20
  -1   5   6  251.97   12.90
  -1   5   6  241.18   14.30
  -1   5   6  246.08   13.10
   1   5  -6  237.38   13.00
  -1   5   6  261.37   13.20
   0  -5  -6  679.93   29.40
   0  -5  -6  595.24   40.20
   0  -5   6  680.63   33.80
   0  -5   6  700.43   53.19
   0  -5   6  739.73   48.10
   0  -5   6  666.93   32.80
   0   5  -6  634.74   32.30
   0   5   6  640.74   29.40
   0   5   6  687.03   30.00
   0   5   6  668.33   31.30
   0   5   6  685.33   29.90
   0   5   6  696.73   36.30
   0   5  -6  621.14   29.60
   1  -5   6  497.05   42.40
   1  -5   6  480.75   26.10
  -1  -5  -6  494.05   33.90
   1  -5   6  502.75   25.70
   1   5   6  509.75   22.90
  -1   5  -6  482.35   22.80
   1   5   6  481.75   24.10
   1   5   6  489.05   22.50
  -1   5  -6  511.75   23.50
   1   5   6  495.15   22.90
   2  -5   6   43.90    4.40
   2  -5   6   41.30    5.30
   2  -5   6   42.20   10.60
   2  -5   6   47.40    5.60
  -2  -5  -6   49.80   11.60
  -2   5  -6   41.30    4.30
   2   5   6   42.20    4.10
   2   5   6   45.50    3.80
  -2   5  -6   44.50    4.80
   2   5   6   43.00    4.10
   2   5   6   44.20    4.80
   3  -5   6   14.30    3.10
   3  -5   6   19.70    3.30
   3  -5   6   20.90    3.10
   3   5   6   18.00    2.70
  -3   5  -6   19.90    3.20
   3   5   6   22.60    2.50
  -3   5  -6   21.30    3.30
   3   5   6   24.90    3.30
  -3   5  -6   22.50    3.20
   4  -5   6  105.19    9.50
   4  -5   6  102.49    6.60
   4   5   6   97.79    6.90
   4   5   6  105.29    7.00
   4   5   6  106.59    6.50
  -4   5  -6  100.29    6.60
  -4   5  -6   97.99    7.40
  -4   5  -6   94.99    7.40
   4   5   6  106.49    5.90
  -4   5  -6  107.79    6.90
   5  -5   6  207.18   10.50
   5  -5   6  210.78   10.90
  -5  -5  -6  194.58   11.70
   5  -5   6  204.68   11.10
   5   5   6  198.48    9.70
  -5   5  -6  210.68   11.20
  -5   5  -6  214.48   10.70
   5   5   6  217.48   10.90
  -5   5  -6  224.78   10.70
   5   5   6  218.18    9.60
   8   6  -6   74.89    4.40
   8   6  -6   68.09    5.80
  -8   6   6   75.19    5.00
  -8   6   6   75.69    4.30
  -8   6   6   73.49    4.50
  -7  -6   6  113.09   20.60
   7   6  -6  147.49    7.50
  -7   6   6  153.58    8.00
   7   6  -6  148.59    7.70
  -7   6   6  147.49    8.20
   7   6  -6  129.49    8.00
  -7   6   6  158.38    8.60
  -6  -6   6  325.27   33.40
   6  -6  -6  392.86   17.00
  -6   6   6  405.16   18.10
   6   6  -6  392.76   17.20
  -6   6   6  401.26   18.90
  -6   6   6  384.16   17.60
  -6   6   6  390.56   17.90
  -5  -6   6  503.35   28.90
   5  -6  -6  533.45   22.90
  -5  -6   6  456.95   41.80
  -5   6   6  529.75   24.50
  -5   6   6  573.94   23.70
  -5   6   6  522.55   23.10
   5   6  -6  488.65   22.60
   5   6  -6  509.25   22.30
  -5   6   6  537.35   23.50
  -4  -6   6    8.00    2.40
  -4  -6   6    6.90    5.10
  -4  -6   6    1.40    2.70
   4  -6  -6    6.90    1.40
  -4   6   6    5.10    1.70
  -4   6   6    6.90    1.80
  -4   6   6    3.10    1.60
  -4   6   6    5.60    2.00
   3  -6  -6  213.88   10.90
  -3  -6   6  205.68   13.50
  -3  -6   6  215.58   26.30
  -3  -6   6  207.68   12.30
   3   6  -6  206.88   10.20
  -3   6   6  215.28   11.30
  -3   6   6  209.38   10.90
  -3   6   6  206.58   12.10
  -3   6   6  196.48   11.00
  -2  -6   6  577.44   28.40
  -2  -6   6  558.34   27.00
   2  -6  -6  565.44   24.60
  -2  -6   6  535.85   45.20
  -2   6   6  545.15   26.00
  -2   6   6  523.45   24.50
  -2   6   6  555.14   24.90
   2   6  -6  536.95   23.90
  -2   6   6  559.04   25.00
  -1  -6   6  201.78   12.90
  -1  -6   6  188.78   13.20
  -1  -6   6  202.78   25.80
   1  -6  -6  203.38   10.60
  -1   6   6  206.48   12.10
  -1   6   6  210.68   10.70
  -1   6   6  210.68   11.10
  -1   6   6  213.88   11.10
   1   6  -6  190.98   10.40
   0  -6   6  256.97   27.50
   0  -6   6  251.47   15.10
   0  -6   6  271.57   16.00
   0   6   6  230.38   15.10
   0   6   6  251.47   12.80
   0   6  -6  250.67   13.40
   0   6   6  267.07   13.20
   0   6  -6  273.07   13.80
   0   6   6  257.47   14.10
   1  -6   6  191.58   11.90
   1  -6   6  185.68   10.70
   1  -6   6  189.58   12.20
   1  -6   6  172.08   21.00
   1   6   6  175.88   10.60
   1   6   6  184.78   10.00
   1   6   6  189.28    9.70
   1   6   6  178.68    9.90
  -1   6  -6  176.28    9.80
   2  -6   6  162.68   10.40
   2  -6   6  162.28   10.70
   2  -6   6  172.08    8.70
  -2   6  -6  151.78   11.80
   2   6   6  169.78    9.00
   2   6   6  165.48    8.60
   2   6   6  180.28   11.20
  -2   6  -6  164.88    9.40
   2   6   6  158.68    9.00
  -2   6  -6  150.18    9.00
   3  -6   6   23.80    3.20
   3  -6   6   22.70    2.80
   3  -6   6   22.30    3.10
   3   6   6   25.40    2.90
  -3   6  -6   27.50    3.20
   3   6   6   22.50    2.50
   3   6   6   22.80    2.30
  -3   6  -6   18.00    2.90
  -3   6  -6   25.10    3.90
   4  -6   6  120.59    5.90
   4  -6   6  116.49    6.70
   4  -6   6  101.89    7.30
  -4   6  -6  120.99    6.70
  -4   6  -6  113.59    6.10
   4   6   6  103.49    6.60
  -6   7   6  402.06   18.90
  -6   7   6  478.05   20.80
  -6   7   6  409.36   18.60
   5  -7  -6    5.50    1.10
  -5  -7   6    4.70    3.50
  -5   7   6    6.20    1.30
  -5   7   6    4.80    1.70
  -5   7   6    6.50    1.80
  -5   7   6    6.40    1.70
   4  -7  -6   37.30    3.00
  -4   7   6   41.40    3.30
  -4   7   6   42.60    3.60
  -4   7   6   48.20    5.60
  -4   7   6   49.90    4.00
   3  -7  -6   23.30    2.30
  -3  -7   6   18.50    7.40
  -3  -7   6   21.50    3.40
  -3  -7   6   21.40    2.90
  -3   7   6   26.20    2.70
  -3   7   6   26.70    3.00
  -3   7   6   22.80    4.20
  -3   7   6   23.70    3.30
  -2  -7   6  104.39   15.50
  -2  -7   6  110.19    7.90
   2  -7  -6  116.89    6.70
  -2  -7   6  139.29   10.60
  -2   7   6  109.99    8.10
  -2   7   6  119.99    7.60
  -2   7   6  135.49    8.60
  -2   7   6  124.79    7.20
  -1  -7   6   15.60    3.40
  -1  -7   6    9.80    4.90
  -1   7   6   15.40    2.10
  -1   7   6   17.10    2.60
   0  -7   6   88.29    6.50
   0  -7   6   73.89   11.20
   0  -7   6   94.29    6.80
   0   7   6   93.89    5.40
   0   7   6   94.19    6.00
   0   7   6   92.19    5.80
   0   7   6   90.49    5.60
   1  -7   6  397.56   19.20
   1  -7   6  393.16   19.00
   1   7   6  403.06   18.00
   1   7   6  384.96   18.10
   1   7   6  420.16   17.60
   1   7   6  398.66   18.10
   2  -7   6  251.27   13.10
   2  -7   6  292.27   13.80
   2   7   6  262.27   13.00
   2   7   6  268.57   12.30
   2   7   6  264.17   12.00
  12   0  -7   79.39    4.50
 -12   0   7   64.09    5.70
 -11   0   7   83.09    6.00
  11   0  -7   75.59    5.60
  10   0  -7   16.30    2.90
  10   0  -7    8.50    3.40
  10   0  -7   15.00    3.70
  10   0  -7   13.10    2.30
 -10   0   7   15.40    3.00
  -9   0   7  131.49    7.70
   9   0  -7  121.29    8.40
   9   0  -7  128.49    8.00
   9   0  -7  137.99   10.00
  -9   0   7  106.69   18.70
   8   0  -7   21.70    3.70
   8   0  -7   21.50    2.90
  -8   0   7   22.50    8.60
   8   0  -7   26.00    3.80
   8   0  -7   30.90    5.10
  -8   0   7   29.50    3.40
   8   0  -7   25.40    3.50
  -8   0   7   22.40    3.60
   7   0  -7 4248.98  183.28
  -7   0   7 4618.54  182.18
   7   0  -7 4650.94  180.38
   7   0  -7 4498.55  181.78
   7   0  -7 4512.85  180.18
   7   0  -7 4334.47  180.28
  -6   0   7 1233.98   51.99
  -6   0   7 1154.38   50.39
   6   0  -7 1168.18   50.29
  -6   0   7 1225.48   61.99
   6   0  -7 1212.68   50.19
   6   0  -7 1230.28   51.69
   6   0  -7 1118.99   52.89
   6   0  -7 1164.48   50.09
   5   0  -7  531.15   28.20
   5   0  -7  589.24   25.80
  -5   0   7  595.74   27.40
   5   0  -7  583.04   25.80
  -5   0   7  595.34   26.10
   5   0  -7  560.84   26.70
   5   0  -7  565.94   25.60
  -5   0   7  550.04   27.00
   4   0  -7   13.60    2.50
  -4   0   7   19.30    3.50
   4   0  -7   14.70    2.70
   4   0  -7   17.50    3.10
   4   0  -7   16.50    2.50
  -4   0   7   18.10    3.00
  -3   0   7  285.47   15.90
  -3   0   7  265.37   14.50
   3   0  -7  281.17   13.30
  -3   0   7  250.77   13.50
   3   0  -7  263.27   13.40
  -3   0   7  255.97   15.00
   2   0  -7 1146.99   48.60
  -2   0   7 1085.79   48.80
  -2   0   7 1177.98   50.99
  -2   0   7 1098.59   53.19
   2   0  -7 1241.68   48.70
   1   0  -7   51.19    4.40
   1   0  -7   43.00    5.00
   1   0  -7   48.80    4.40
  -1   0   7   53.09    4.40
  -1   0   7   44.20    5.20
  -1   0   7   44.80    4.60
   0   0   7 1380.76   59.29
   0   0  -7 1431.06   60.99
   0   0  -7 1473.55   59.49
   0   0  -7 1468.75   59.29
   0   0  -7 1405.06   59.29
   0   0   7 1234.78   60.49
   0   0   7 1410.26   61.39
   0   0   7 1465.15   59.49
  -1   0  -7 1598.24   66.09
  -1   0  -7 1593.04   66.19
   1   0   7 1555.04   68.19
  -1   0  -7 1559.14   67.69
   1   0   7 1514.55   66.59
  -1   0  -7 1609.14   66.09
   1   0   7 1589.34   65.99
  -2   0  -7  449.46   22.80
  -2   0  -7  433.86   21.10
   2   0   7  442.96   23.30
   2   0   7  437.06   24.50
  -2   0  -7  447.26   21.50
   2   0   7  427.96   25.30
  -2   0  -7  455.55   21.50
   3   0   7  336.57   17.20
  -3   0  -7  347.47   17.70
  -3   0  -7  343.57   17.50
  -3   0  -7  345.37   17.30
  -3   0  -7  358.56   19.10
   3   0   7  368.86   19.80
   3   0   7  337.67   19.70
  -4   0  -7  357.46   17.70
   4   0   7  355.96   20.40
   4   0   7  353.06   21.10
  -4   0  -7  406.16   21.30
  -4   0  -7  357.66   19.70
   5   0   7  204.68   11.90
   5   0   7  201.88   13.00
  -5   0  -7  213.68   12.50
  -5   0  -7  214.38   10.20
  -6   0  -7    7.30    2.10
   6   0   7   11.00    2.30
  -6   0  -7    4.40    2.10
   6   0   7    7.40    2.80
   7   0   7  215.08   11.10
  -7   0  -7  212.58   10.90
  -7   0  -7  208.48   10.00
  12  -1  -7    6.30    1.80
 -12  -1   7    5.40    1.10
 -12   1   7    5.50    1.50
  12   1  -7    4.10    1.00
  11  -1  -7  158.28   10.90
  11  -1  -7  170.28    9.10
 -11  -1   7  171.28    9.50
  11   1  -7  162.98    8.00
 -11   1   7  161.98    9.70
  11   1  -7  165.28    9.40
  10  -1  -7  111.09    8.70
  10  -1  -7  115.49    7.80
 -10  -1   7  118.99    8.10
  10   1  -7  121.89    8.10
  10   1  -7  117.19    7.00
  10   1  -7  114.39    7.70
 -10   1   7  124.69    8.60
 -10   1   7  118.69    7.10
  10   1  -7  121.09    7.30
   9  -1  -7  536.45   25.80
   9  -1  -7  516.05   27.10
   9  -1  -7  515.75   23.50
  -9  -1   7  530.45   26.00
   9   1  -7  554.34   26.00
   9   1  -7  536.35   24.80
   9   1  -7  548.15   24.80
  -9   1   7  563.14   25.10
   9   1  -7  551.44   24.80
  -9   1   7  572.94   26.90
   8  -1  -7  867.71   38.00
   8  -1  -7  798.12   36.00
  -8  -1   7  865.01   38.00
  -8  -1   7  806.52   47.50
   8  -1  -7  793.52   35.80
   8  -1  -7  839.02   39.50
  -8  -1   7  835.52   57.09
  -8   1   7  864.81   38.80
  -8   1   7  815.42   37.00
   8   1  -7  822.02   36.30
  -8   1   7  829.42   52.79
   8   1  -7  862.81   38.00
   8   1  -7  853.31   36.50
   8   1  -7  858.61   36.70
   7  -1  -7  336.97   19.40
  -7  -1   7  342.67   33.70
  -7  -1   7  367.86   18.30
   7  -1  -7  343.27   16.70
   7  -1  -7  355.26   18.30
  -7  -1   7  354.96   25.90
   7  -1  -7  335.17   16.80
   7  -1  -7  346.87   17.10
   7   1  -7  360.16   17.10
  -7   1   7  357.76   17.60
  -7   1   7  316.47   18.30
   7   1  -7  358.56   16.90
   7   1  -7  332.17   16.70
   7   1  -7  358.66   18.20
   6  -1  -7 1486.85   61.39
   6  -1  -7 1487.55   61.49
   6  -1  -7 1497.55   62.89
   6  -1  -7 1470.35   61.49
  -6  -1   7 1447.06   62.69
  -6  -1   7 1477.25   83.89
  -6  -1   7 1376.96   70.99
   6  -1  -7 1481.45   64.49
   6   1  -7 1509.15   61.29
  -6   1   7 1579.24   76.79
  -6   1   7 1470.05   63.79
  -6   1   7 1459.55   63.49
  -6   1   7 1437.76   59.79
   6   1  -7 1489.25   61.49
  -6   1   7 1458.95   62.09
   6   1  -7 1468.45   62.69
   6   1  -7 1435.96   61.29
   5  -1  -7   87.39    6.10
   5  -1  -7   73.39    7.30
   5  -1  -7   79.49    5.70
   5  -1  -7   98.49    6.30
  -5  -1   7   81.79    6.60
  -5  -1   7   80.39   15.00
   5  -1  -7   79.99    6.60
   5   1  -7   78.29    6.40
   5   1  -7   87.79    5.90
  -5   1   7   92.69    5.20
  -5   1   7   76.69    7.20
  -5   1   7   86.39    6.40
   5   1  -7   85.29    5.90
   5   1  -7   86.79    5.80
  -5   1   7   80.49    6.90
   4  -1  -7   36.10    3.70
  -4  -1   7   22.90    8.80
   4  -1  -7   27.60    3.40
   4  -1  -7   26.60    6.80
   4  -1  -7   29.40    3.30
  -4  -1   7   20.10    3.50
   4  -1  -7   23.70    8.50
  -4   1   7   26.00    3.30
  -4   1   7   24.50    3.20
   4   1  -7   25.40    3.70
  -4   1   7   30.90    4.50
  -4   1   7   23.60    3.40
  -4   1   7   25.00    4.20
   4   1  -7   25.60    2.80
   4   1  -7   26.40    3.20
   4   1  -7   26.40    3.20
   3  -1  -7  127.09    8.90
   3  -1  -7  154.48    8.50
   3  -1  -7  133.59    8.10
  -3  -1   7  154.98    9.50
   3  -1  -7  142.59   16.00
  -3  -1   7  141.59   10.00
   3  -1  -7  149.59    9.00
  -3  -1   7  159.78   19.70
   3  -1  -7  167.08   10.70
   3   1  -7  131.29    8.40
  -3   1   7  132.99    7.60
  -3   1   7  147.79   10.10
   3   1  -7  133.29    9.00
  -3   1   7  135.39   10.10
  -3   1   7  132.89    7.60
   3   1  -7  136.09    8.10
  -3   1   7  123.19    7.20
  -3   1   7  125.69    8.00
   3   1  -7  130.99    7.80
  -3   1   7  140.59    8.80
   2  -1  -7 2838.92  122.29
   2  -1  -7 2899.01  120.59
   2  -1  -7 3136.99  124.89
  -2  -1   7 3070.39  122.89
   2  -1  -7 2960.50  119.19
  -2  -1   7 2952.90  120.79
   2  -1  -7 3003.90  119.19
   2  -1  -7 2804.52  133.49
  -2  -1   7 3265.57  144.99
   2   1  -7 2947.41  118.99
  -2   1   7 2920.81  117.89
  -2   1   7 2879.51  117.79
  -2   1   7 2872.61  119.69
   2   1  -7 2809.32  120.39
   2   1  -7 2674.03  119.19
  -2   1   7 3039.50  121.99
  -2   1   7 3009.90  123.49
  -2   1   7 2998.20  119.39
  -2   1   7 2604.54  117.89
   2   1  -7 3013.80  118.79
   1  -1  -7  291.57   24.50
  -1  -1   7  271.37   16.90
   1  -1  -7  328.77   17.00
   1  -1  -7  319.47   15.50
  -1  -1   7  293.37   16.60
  -1  -1   7  335.27   36.10
  -1  -1   7  336.07   19.10
   1  -1  -7  323.97   15.50
   1  -1  -7  325.07   15.50
   1   1  -7  312.67   15.50
   1   1  -7  306.07   15.40
  -1   1   7  303.47   17.40
  -1   1   7  284.97   17.20
  -1   1   7  326.67   17.50
  -1   1   7  311.67   15.90
   1   1  -7  308.67   15.20
  -1   1   7  301.37   14.30
   1   1  -7  295.97   16.70
   0  -1  -7  304.27   27.10
   0  -1  -7  313.07   15.70
   0  -1  -7  299.47   15.50
   0  -1  -7  328.97   15.90
   0  -1   7  299.87   17.40
   0  -1   7  320.67   17.30
   0  -1  -7  294.17   16.90
   0  -1   7  353.86   31.80
   0  -1   7  371.76   20.50
   0   1  -7  312.87   15.90
   0   1   7  311.17   17.90
   0   1   7  305.97   16.30
   0   1   7  285.97   14.30
   0   1  -7  296.87   16.90
   0   1   7  290.57   15.90
   0   1  -7  328.87   15.80
   0   1   7  309.87   14.20
   0   1  -7  321.37   15.90
   1  -1   7 1650.23   75.69
   1  -1   7 1979.60   99.79
   1  -1   7 1857.41   76.29
   1  -1   7 1609.64   73.49
  -1  -1  -7 1729.13   75.59
  -1  -1  -7 1831.22   74.09
  -1  -1  -7 1679.73   92.39
  -1  -1  -7 1725.43   73.69
   1  -1   7 1738.43   74.89
  -1  -1  -7 1768.92   74.59
  -1   1  -7 1790.72   75.99
  -1   1  -7 1843.02   74.29
   1   1   7 1835.42   75.49
   1   1   7 1796.42   76.99
   1   1   7 1766.02   72.09
   1   1   7 1838.02   74.79
  -1   1  -7 1766.92   74.29
  -1   1  -7 1831.12   74.59
   2  -1   7 2846.72  136.79
   2  -1   7 3486.75  139.99
   2  -1   7 3170.98  138.79
  -2  -1  -7 3419.46  137.19
  -2  -1  -7 3436.46  137.09
   2  -1   7 3396.06  146.59
  -2  -1  -7 3215.48  137.19
  -2  -1  -7 3519.75  139.59
   2  -1   7 3293.47  144.39
  -2   1  -7 3415.76  139.59
  -2   1  -7 3475.35  137.99
   2   1   7 3428.96  138.09
   2   1   7 3505.45  139.49
  -2   1  -7 3458.25  137.99
  -2   1  -7 3532.25  138.29
   2   1   7 3534.65  140.99
  -3  -1  -7 1446.36   61.09
   3  -1   7 1405.96   66.99
  -3  -1  -7 1368.06   58.19
   3  -1   7 1339.67   61.79
   3  -1   7 1396.06   61.49
   3   1   7 1352.76   59.59
  -3   1  -7 1433.26   59.69
  -3   1  -7 1408.66   61.29
  -3   1  -7 1398.46   59.59
   3   1   7 1435.06   62.39
  -3   1  -7 1401.96   59.39
   3   1   7 1402.76   61.69
  -4  -1  -7   91.09   10.50
  -4  -1  -7   77.89    5.10
   4  -1   7   96.79    8.40
   4   1   7   97.79    7.70
   4   1   7   96.39    8.30
  -4   1  -7   84.29    6.90
  -4   1  -7   83.49    6.60
   5  -1   7  380.96   20.40
  -5  -1  -7  403.26   19.80
   5  -1   7  386.56   19.50
  -5   1  -7  399.06   18.30
   5   1   7  406.86   18.80
   5   1   7  388.26   21.00
  -5   1  -7  398.16   18.60
  -5   1  -7  390.16   20.10
  -5   1  -7  393.96   19.20
   6  -1   7   32.20    3.80
  -6  -1  -7   34.00    3.30
   6  -1   7   31.70    3.80
   6   1   7   27.50    3.70
  -6   1  -7   25.90    3.60
  -6   1  -7   24.50    3.10
   6   1   7   31.20    3.90
   6   1   7   27.50    3.30
   7  -1   7   11.90    2.90
  -7  -1  -7    7.50    1.60
   7   1   7   11.10    2.00
  -7   1  -7   10.90    1.80
  11  -2  -7   57.39    4.90
  11  -2  -7   51.89    3.50
 -11  -2   7   53.89    4.00
  11   2  -7   53.79    4.20
  11   2  -7   53.39    3.50
 -11   2   7   42.90    5.10
 -11   2   7   52.09    4.00
  11   2  -7   49.90    3.90
  10  -2  -7   -0.50    1.40
  10  -2  -7    2.00    1.40
 -10  -2   7    1.50    3.60
 -10  -2   7    2.50    1.40
  10   2  -7    0.20    1.00
  10   2  -7    4.20    1.60
 -10   2   7   -0.40    1.20
  10   2  -7    0.50    1.80
  10   2  -7    1.50    1.30
  -9  -2   7  145.39   20.70
   9  -2  -7  163.48   10.00
  -9  -2   7  170.68    9.90
   9  -2  -7  165.48   11.30
   9   2  -7  164.38    9.10
  -9   2   7  154.18   10.60
  -9   2   7  162.28    9.70
   9   2  -7  155.68   10.10
   9   2  -7  166.08    9.30
   9   2  -7  151.68    9.90
   8  -2  -7  934.91   41.10
  -8  -2   7  800.52   59.19
   8  -2  -7  849.72   38.80
  -8  -2   7  893.31   38.70
   8   2  -7  839.32   37.70
   8   2  -7  867.01   38.90
   8   2  -7  884.71   37.80
  -8   2   7  865.51   38.50
   8   2  -7  858.21   37.50
  -8   2   7  865.41   36.00
  -8   2   7  882.01   40.10
  -7  -2   7 1151.78   49.30
  -7  -2   7 1154.98   73.89
   7  -2  -7 1178.08   51.69
   7  -2  -7 1138.19   49.70
   7  -2  -7 1068.29   46.80
  -7   2   7 1153.28   49.40
   7   2  -7 1117.39   49.40
  -7   2   7 1114.19   50.69
  -7   2   7 1114.19   47.10
   7   2  -7 1200.68   48.40
   7   2  -7 1130.39   48.10
  -7   2   7 1076.99   48.40
   7   2  -7 1182.18   48.20
   6  -2  -7 1739.93   70.39
  -6  -2   7 1692.33   72.19
   6  -2  -7 1722.93   72.79
   6  -2  -7 1726.23   74.59
  -6   2   7 1517.25   86.19
   6   2  -7 1711.03   70.79
   6   2  -7 1700.13   74.09
  -6   2   7 1701.73   70.49
   6   2  -7 1760.82   71.19
  -6   2   7 1741.83   70.49
  -6   2   7 1898.51   76.79
  -6   2   7 1685.93   70.69
  -6   2   7 1729.03   72.19
   5  -2  -7  827.12   37.60
  -5  -2   7  963.00   60.49
   5  -2  -7  814.52   35.70
   5  -2  -7  821.52   38.90
  -5  -2   7  878.21   37.40
   5  -2  -7  774.22   36.60
   5   2  -7  792.22   35.90
  -5   2   7  849.61   35.50
  -5   2   7  767.92   37.10
  -5   2   7  843.82   37.20
   5   2  -7  861.51   36.10
   5   2  -7  841.32   35.80
  -5   2   7  860.91   39.30
   5   2  -7  826.92   37.20
  -5   2   7  816.62   38.70
  -5   2   7  861.81   35.90
  -5   2   7  824.32   35.60
   4  -2  -7  194.28   10.30
   4  -2  -7  207.48   11.90
   4  -2  -7  209.68   20.10
   4  -2  -7  195.58   10.70
  -4  -2   7  194.08   11.50
  -4  -2   7  220.78   25.20
  -4  -2   7  171.38   11.90
   4  -2  -7  197.78   12.70
  -4   2   7  206.28   10.30
   4   2  -7  202.08   10.20
  -4   2   7  193.28    9.90
  -4   2   7  212.58   13.10
   4   2  -7  174.88   10.30
  -4   2   7  183.68   11.40
  -4   2   7  197.78   10.10
   4   2  -7  176.28   11.20
  -4   2   7  197.88   11.30
   4   2  -7  193.08   10.40
  -4   2   7  186.18   12.50
  -3  -2   7  690.63   34.10
   3  -2  -7  703.43   33.60
  -3  -2   7  671.33   31.70
   3  -2  -7  701.23   32.30
   3  -2  -7  732.73   30.80
   3  -2  -7  659.03   42.80
   3  -2  -7  757.32   30.70
  -3  -2   7  767.62   52.39
  -3  -2   7  642.04   34.20
  -3   2   7  675.93   33.30
  -3   2   7  752.22   32.10
  -3   2   7  672.63   31.60
  -3   2   7  703.53   33.50
  -3   2   7  709.13   30.30
  -3   2   7  683.43   30.00
   3   2  -7  676.33   30.50
  -3   2   7  700.63   30.30
   2  -2  -7  359.46   19.80
  -2  -2   7  388.36   21.60
  -2  -2   7  389.26   34.50
  -2  -2   7  346.37   18.10
   2  -2  -7  366.56   27.70
   2  -2  -7  332.67   16.90
   2  -2  -7  334.77   18.30
  -2  -2   7  357.86   18.70
   2  -2  -7  374.06   16.90
  -2  -2   7  348.27   19.90
  -2   2   7  344.27   16.30
  -2   2   7  334.27   19.30
   2   2  -7  363.06   17.10
  -2   2   7  346.17   18.00
  -2   2   7  359.16   16.50
  -2   2   7  347.97   19.40
  -2   2   7  347.37   16.50
  -2   2   7  351.96   18.00
   1  -2  -7  278.07   25.00
  -1  -2   7  260.97   16.30
  -1  -2   7  290.77   15.70
   1  -2  -7  271.67   15.30
   1  -2  -7  272.97   13.90
   1  -2  -7  264.37   13.50
  -1  -2   7  272.37   18.50
  -1  -2   7  327.17   31.60
  -1  -2   7  278.37   15.10
   1   2  -7  271.37   15.30
  -1   2   7  285.77   15.20
  -1   2   7  277.27   16.60
   1   2  -7  271.87   14.10
   1   2  -7  256.57   14.00
  -1   2   7  292.07   13.60
  -1   2   7  272.57   13.40
  -1   2   7  278.77   14.90
  -1   2   7  284.17   13.30
   1   2  -7  266.07   13.80
  -1   2   7  256.57   16.20
   0  -2   7  834.42   38.20
   0  -2   7  895.51   43.50
   0  -2   7  814.22   39.50
   0  -2   7  896.91   39.20
   0  -2  -7  836.82   36.10
   0  -2  -7  832.72   52.19
   0  -2   7  969.50   60.99
   0  -2  -7  791.02   38.30
   0   2   7  776.02   38.60
   0   2  -7  873.11   37.30
   0   2  -7  820.52   38.50
   0   2   7  844.92   37.90
   0   2   7  863.91   36.20
   0   2  -7  860.51   37.00
   0   2  -7  819.12   37.20
   0   2   7  881.21   36.00
   0   2   7  842.52   40.10
   0   2   7  816.22   40.00
   0   2   7  830.32   36.20
  -1  -2  -7  249.88   14.80
   1  -2   7  227.28   17.70
   1  -2   7  263.17   27.90
  -1  -2  -7  218.18   11.40
   1  -2   7  252.77   14.50
  -1  -2  -7  220.68   24.10
   1  -2   7  233.28   13.70
   1  -2   7  213.28   15.00
   1   2   7  235.18   12.70
   1   2   7  227.88   13.10
  -1   2  -7  220.18   13.90
  -1   2  -7  237.78   13.00
   1   2   7  223.48   11.90
   1   2   7  249.28   15.70
  -1   2  -7  223.18   12.60
   1   2   7  213.68   17.30
   1   2   7  221.58   11.60
   2  -2   7  111.09    8.80
  -2  -2  -7   83.29   17.60
   2  -2   7  126.89    9.10
  -2  -2  -7  119.49    8.60
   2  -2   7   93.09   11.70
   2  -2   7  107.69    8.40
   2   2   7  113.59    8.00
  -2   2  -7  111.79    7.90
  -2   2  -7  105.79    8.40
   2   2   7  102.79    9.10
   2   2   7   99.39    7.60
  -2   2  -7  116.69    7.90
  -2   2  -7   98.29    7.50
   2   2   7  111.29    6.30
   2   2   7   99.09    8.80
   3  -2   7  682.23   39.00
   3  -2   7  700.93   32.60
   3  -2   7  718.43   32.50
  -3  -2  -7  668.43   31.60
  -3  -2  -7  622.24   48.70
   3  -2   7  648.74   31.40
  -3   2  -7  720.43   31.30
  -3   2  -7  676.33   30.70
  -3   2  -7  617.64   34.80
   3   2   7  693.73   33.50
   3   2   7  642.84   32.70
   3   2   7  720.43   28.70
   3   2   7  641.04   31.00
  -3   2  -7  664.43   32.10
   4  -2   7  243.78   14.60
   4  -2   7  251.07   14.80
  -4  -2  -7  249.38   14.00
  -4   2  -7  264.67   14.00
   4   2   7  245.88   13.70
  -4   2  -7  255.47   14.00
   4   2   7  262.57   11.30
   4   2   7  273.47   16.00
  -4   2  -7  250.67   14.80
  -4   2  -7  262.57   13.70
   5  -2   7   37.80    4.10
  -5  -2  -7   33.40    4.00
   5  -2   7   36.30    4.00
  -5   2  -7   35.20    4.20
   5   2   7   32.10    3.50
  -5   2  -7   37.50    4.60
  -5   2  -7   35.50    3.50
   5   2   7   39.80    4.70
  -5   2  -7   34.80    3.90
   6  -2   7   85.29    5.40
   6  -2   7   94.09    6.00
   6  -2   7   81.99    5.50
  -6   2  -7   92.39    5.00
   6   2   7   96.19    6.90
   6   2   7   83.79    5.30
   6   2   7   87.39    5.40
  -6   2  -7   83.59    6.80
  -6   2  -7   93.89    6.30
  11  -3  -7  192.08   10.40
 -11   3   7  207.78   11.80
  11   3  -7  197.48    9.90
 -11   3   7  185.18    9.60
  11   3  -7  191.78   10.30
  11   3  -7  203.28    9.20
 -10  -3   7  255.87   13.80
  10  -3  -7  305.17   16.20
 -10   3   7  267.27   15.20
  10   3  -7  291.27   13.90
  10   3  -7  290.87   14.40
 -10   3   7  332.77   16.00
  10   3  -7  274.67   13.80
   9  -3  -7  488.35   23.50
  -9  -3   7  408.66   37.70
   9  -3  -7  462.45   23.40
  -9  -3   7  485.75   21.10
   9   3  -7  462.25   21.20
  -9   3   7  436.06   19.60
   9   3  -7  472.65   21.40
   9   3  -7  477.15   21.20
  -9   3   7  449.16   23.10
  -9   3   7  489.05   22.20
   9   3  -7  473.85   22.20
  -8  -3   7  138.19    8.00
  -8  -3   7  118.59   20.00
   8  -3  -7  128.29    9.80
  -8  -3   7  121.19    9.60
   8  -3  -7  134.79    8.40
   8   3  -7  123.99    7.70
   8   3  -7  126.89    7.80
  -8   3   7  131.69    8.70
  -8   3   7  114.79    9.30
   8   3  -7  125.29    7.70
  -8   3   7  130.69    7.00
   8   3  -7  124.59    8.40
  -8   3   7  116.79    7.30
  -7  -3   7 1158.48   55.29
  -7  -3   7 1258.67   52.09
   7  -3  -7 1260.97   54.99
   7  -3  -7 1214.28   52.89
  -7  -3   7 1193.08   78.29
   7   3  -7 1214.88   52.89
  -7   3   7 1170.08   54.59
  -7   3   7 1216.98   52.99
   7   3  -7 1418.86   54.39
   7   3  -7 1200.98   51.59
   7   3  -7 1179.28   51.49
  -7   3   7 1243.08   51.09
  -7   3   7 1222.08   51.29
  -6  -3   7  571.04   28.80
   6  -3  -7  530.55   25.90
  -6  -3   7  582.94   47.90
  -6  -3   7  520.15   24.90
  -6  -3   7  497.45   29.00
   6  -3  -7  559.24   27.60
  -6   3   7  514.45   27.30
  -6   3   7  550.44   27.70
   6   3  -7  549.74   24.30
  -6   3   7  571.74   24.60
  -6   3   7  546.45   24.20
   6   3  -7  540.15   24.50
   6   3  -7  555.04   24.60
   6   3  -7  519.25   25.50
  -6   3   7  561.94   24.70
  -5  -3   7   38.10   11.10
  -5  -3   7   24.30    4.70
   5  -3  -7   27.50    4.40
  -5  -3   7   29.60    3.70
   5  -3  -7   33.50    4.50
   5   3  -7   37.60    3.80
  -5   3   7   22.70    3.50
  -5   3   7   33.70    3.90
   5   3  -7   28.30    3.30
  -5   3   7   33.80    3.50
  -5   3   7   36.90    3.30
   5   3  -7   21.00    4.00
   5   3  -7   31.80    3.20
  -5   3   7   21.30    5.90
  -4  -3   7  157.18   10.90
  -4  -3   7  160.08    9.30
   4  -3  -7  159.48   10.40
   4  -3  -7  182.88   19.20
  -4  -3   7  155.28   35.90
  -4   3   7  150.98   11.80
  -4   3   7  162.28   11.00
   4   3  -7  159.98    9.00
  -4   3   7  177.98    9.30
  -4   3   7  171.88    9.20
   4   3  -7  159.58    8.70
   4   3  -7  154.38   10.30
   4   3  -7  142.89    9.10
  -4   3   7  164.38   11.80
  -3  -3   7  166.08   10.80
   3  -3  -7  150.88    9.90
  -3  -3   7  143.79    8.90
   3  -3  -7  151.38   11.00
   3  -3  -7  142.29   16.80
  -3  -3   7  150.48   21.60
  -3  -3   7  140.59   12.50
  -3  -3   7  149.19   11.60
   3   3  -7  143.59    8.70
  -3   3   7  166.08   12.60
  -3   3   7  152.98   11.30
  -3   3   7  177.88    9.00
  -3   3   7  148.39   10.50
   3   3  -7  124.19    8.80
   3   3  -7  156.58    8.50
  -3   3   7  173.98    9.00
  -3   3   7  154.88    9.90
  -3   3   7  170.58    8.70
   2  -3  -7   51.09    9.70
  -2  -3   7   53.39    5.90
  -2  -3   7   61.79    6.60
  -2  -3   7   51.19    4.60
   2  -3  -7   50.49    5.40
  -2  -3   7   55.49   13.30
  -2  -3   7   51.59    8.50
   2   3  -7   54.79    4.30
  -2   3   7   45.40    5.60
  -2   3   7   52.39    4.20
  -2   3   7   54.09    5.20
   2   3  -7   53.09    5.20
   2   3  -7   54.09    4.60
  -2   3   7   58.29    7.40
   2   3  -7   61.19    7.60
  -2   3   7   54.89    4.50
  -2   3   7   55.19    4.50
  -2   3   7   67.69    6.90
  -1  -3   7 1099.09   45.60
  -1  -3   7 1048.40   50.79
   1  -3  -7 1019.30   59.69
   1  -3  -7 1078.19   46.60
  -1  -3   7 1093.29   52.59
   1   3  -7 1006.10   45.30
   1   3  -7 1060.39   44.90
  -1   3   7 1073.99   47.30
   1   3  -7 1054.89   45.20
  -1   3   7 1054.79   49.50
   1   3  -7 1027.40   46.70
  -1   3   7 1059.49   44.80
  -1   3   7 1035.90   48.80
  -1   3   7 1069.19   44.80
   0  -3   7 1318.47   58.09
   0  -3   7 1289.97   57.09
   0  -3   7 1428.86   82.39
   0  -3   7 1304.17   55.59
   0  -3  -7 1269.47   56.59
   0  -3   7 1361.66   63.39
   0   3  -7 1312.77   54.49
   0   3   7 1309.47   58.69
   0   3  -7 1292.17   54.79
   0   3  -7 1275.37   56.49
   0   3   7 1292.37   53.89
   0   3   7 1140.99   57.79
   0   3   7 1233.18   56.49
   0   3   7 1238.48   53.59
   0   3  -7 1246.98   56.09
   0   3   7 1247.88   55.59
   0   3   7 1325.57   54.09
   1  -3   7 2231.08  100.09
   1  -3   7 2198.68   93.79
   1  -3   7 2205.48   90.39
   1  -3   7 2336.77  119.19
  -1  -3  -7 2270.47   91.49
  -1  -3  -7 2112.89  109.69
   1  -3   7 2198.98   91.09
   1  -3   7 2198.98   93.19
   1   3   7 2263.87   91.89
   1   3   7 2038.10   92.49
  -1   3  -7 2131.59   92.09
  -1   3  -7 2060.19   90.69
  -1   3  -7 2165.78   90.49
   1   3   7 2201.98   94.19
   1   3   7 2217.88   89.89
  -1   3  -7 2157.38   90.89
   1   3   7 2195.08   89.39
   1   3   7 2281.87   89.79
  -2  -3  -7 1816.12   97.69
  -2  -3  -7 1953.90   79.69
   2  -3   7 1968.00   79.39
   2  -3   7 1898.51   81.69
   2  -3   7 1892.71   81.59
   2  -3   7 1983.50   79.99
  -2   3  -7 1901.01   80.79
   2   3   7 1943.51   78.19
   2   3   7 1896.21   82.49
   2   3   7 1984.00   80.49
   2   3   7 1875.91   79.49
   2   3   7 1873.61   77.79
  -2   3  -7 1914.71   79.59
  -2   3  -7 1938.81   79.49
   2   3   7 1627.44   84.99
  -2   3  -7 1955.50   79.79
   3  -3   7  317.47   17.90
   3  -3   7  321.67   17.00
  -3  -3  -7  332.97   33.70
  -3  -3  -7  330.47   16.90
   3  -3   7  354.06   17.60
   3  -3   7  337.87   18.90
   3   3   7  330.47   16.60
   3   3   7  342.77   18.90
  -3   3  -7  345.77   17.60
   3   3   7  347.47   15.70
   3   3   7  347.77   19.70
  -3   3  -7  348.97   17.50
  -3   3  -7  334.97   18.30
   3   3   7  327.47   15.90
  -3   3  -7  371.46   17.50
   4  -3   7   28.70    3.40
   4  -3   7   29.80    3.70
   4  -3   7   29.20    4.00
   4  -3   7   29.90    3.30
   4   3   7   35.00    5.20
  -4   3  -7   29.80    3.90
   4   3   7   24.50    3.20
   4   3   7   17.80    4.10
  -4   3  -7   30.30    3.90
  -4   3  -7   29.00    3.90
  -4   3  -7   26.50    3.30
   4   3   7   25.90    2.40
   5  -3   7   36.00    3.40
   5  -3   7   36.50    3.80
   5  -3   7   37.20    3.60
  -5   3  -7   40.50    3.50
  -5   3  -7   38.50    4.30
  -5   3  -7   35.90    4.20
   5   3   7   44.30    5.70
   5   3   7   36.80    3.70
  -5   3  -7   39.60    4.10
   6  -3   7  102.49    6.50
  -6  -3  -7  115.09    7.30
  -6   3  -7  104.99    6.40
  -6   3  -7  109.89    6.40
   6   3   7   99.19    5.90
  -6   3  -7  109.99    5.60
  10  -4  -7  271.57   13.40
  10   4  -7  257.07   12.30
  10   4  -7  248.58   12.30
 -10   4   7  261.77   12.70
  10   4  -7  268.87   13.50
  -9  -4   7  221.18   26.40
   9  -4  -7  239.98   13.40
   9   4  -7  219.58   13.10
   9   4  -7  239.48   12.30
  -9   4   7  232.48   10.50
   9   4  -7  228.98   11.60
  -9   4   7  226.58   12.30
  -9   4   7  234.38   16.40
   9   4  -7  263.37   12.50
   8  -4  -7  147.89   10.00
  -8  -4   7  136.69   20.90
  -8   4   7  139.39    8.90
   8   4  -7  141.29    8.10
   8   4  -7  153.68    8.30
   8   4  -7  153.38    9.80
  -8   4   7  110.99   10.00
   8   4  -7  145.89    8.00
  -8   4   7  141.09    7.60
  -8   4   7  135.69    8.80
  -8   4   7  134.29    7.80
  -7  -4   7  479.95   24.80
   7  -4  -7  481.45   24.60
  -7   4   7  502.35   21.80
  -7   4   7  497.45   22.10
   7   4  -7  493.45   21.90
  -7   4   7  504.45   22.40
   7   4  -7  506.25   22.20
  -7   4   7  430.76   24.90
   7   4  -7  455.45   22.60
  -7   4   7  482.35   23.40
   7   4  -7  478.55   21.90
   6  -4  -7  393.16   20.70
  -6  -4   7  377.46   37.70
   6  -4  -7  369.36   30.50
  -6  -4   7  401.36   21.50
   6   4  -7  381.56   17.50
  -6   4   7  362.86   19.10
   6   4  -7  368.96   17.60
  -6   4   7  365.66   17.80
  -6   4   7  398.06   17.70
   6   4  -7  341.97   17.80
  -6   4   7  383.76   18.10
  -6   4   7  350.66   26.50
  -5  -4   7  350.96   19.40
   5  -4  -7  324.27   18.10
   5  -4  -7  318.57   26.80
  -5  -4   7  355.56   36.30
  -5  -4   7  324.57   21.30
   5   4  -7  293.97   15.00
   5   4  -7  283.37   15.00
  -5   4   7  320.17   15.20
  -5   4   7  278.37   18.00
  -5   4   7  315.37   15.50
  -5   4   7  315.37   15.50
  -5   4   7  295.97   16.50
   5   4  -7  299.87   14.80
  -4  -4   7 1873.61   79.79
   4  -4  -7 1943.51   99.69
   4  -4  -7 1884.31   81.39
  -4  -4   7 2043.10  110.59
  -4  -4   7 1918.41   82.79
  -4   4   7 1931.61   78.19
  -4   4   7 1888.21   77.89
  -4   4   7 1830.92   81.49
   4   4  -7 1810.22   77.99
   4   4  -7 1798.82   77.29
  -4   4   7 1909.11   78.19
  -4   4   7 1917.61   79.79
  -3  -4   7  459.55   23.50
  -3  -4   7  405.16   27.00
   3  -4  -7  455.15   24.10
  -3  -4   7  491.25   25.60
  -3  -4   7  515.95   43.90
   3  -4  -7  443.96   20.50
   3   4  -7  478.55   20.90
  -3   4   7  461.45   22.80
  -3   4   7  461.25   21.30
  -3   4   7  420.16   23.80
  -3   4   7  471.35   21.30
  -3   4   7  445.56   20.90
   3   4  -7  449.76   21.80
  -2  -4   7  889.61   40.80
  -2  -4   7  836.82   45.50
  -2  -4   7  829.92   41.80
   2  -4  -7  865.31   37.10
  -2  -4   7  964.90   65.29
  -2   4   7  845.32   40.80
   2   4  -7  873.11   38.10
  -2   4   7  844.22   39.20
  -2   4   7  867.11   37.50
   2   4  -7  904.71   37.50
  -2   4   7  890.01   37.90
  -2   4   7  878.31   37.80
  -1  -4   7  669.33   33.40
  -1  -4   7  713.93   55.29
  -1  -4   7  665.13   38.00
   1  -4  -7  581.84   41.60
  -1  -4   7  661.83   32.20
  -1   4   7  642.84   28.90
  -1   4   7  661.33   30.80
   1   4  -7  660.73   29.20
  -1   4   7  664.33   29.20
  -1   4   7  656.73   29.20
  -1   4   7  640.04   32.10
   1   4  -7  651.83   29.50
   0  -4   7   24.60    4.30
   0  -4   7   35.10    9.80
   0  -4   7   16.50    4.00
   0  -4  -7   28.70    9.50
   0  -4   7   25.60    9.40
   0   4   7   27.00    3.40
   0   4   7   26.20    3.80
   0   4  -7   25.10    3.30
   0   4  -7   22.10    3.60
   0   4  -7   27.30    4.20
   0   4   7   27.50    2.90
   0   4   7   27.00    5.50
   0   4   7   26.60    3.30
  -1  -4  -7   21.60    8.70
   1  -4   7   16.80    9.10
   1  -4   7   22.50    4.10
   1  -4   7   25.10    4.30
   1  -4   7   28.30    9.80
  -1   4  -7   23.50    3.40
  -1   4  -7   25.90    3.80
   1   4   7   26.50    3.20
   1   4   7   32.00    3.60
   1   4   7   26.40    3.80
   1   4   7   26.20    2.90
  -1   4  -7   18.10    4.00
   2  -4   7 1405.86   57.29
   2  -4   7 1357.56   59.99
  -2  -4  -7 1220.28   72.99
   2   4   7 1375.96   57.09
  -2   4  -7 1396.96   57.99
  -2   4  -7 1385.36   58.59
   2   4   7 1362.76   56.29
  -2   4  -7 1357.06   57.59
  -2   4  -7 1317.77   57.59
   2   4   7 1325.57   58.39
   2   4   7 1410.06   56.79
   3  -4   7  128.09    7.90
   3  -4   7  124.69    8.80
   3  -4   7  124.49    9.20
   3   4   7  112.09    8.10
   3   4   7  132.69    7.50
  -3   4  -7  134.29    8.90
   3   4   7  128.09    8.50
  -3   4  -7  131.69    8.40
  -3   4  -7  124.69    8.20
   3   4   7  125.99    7.00
  -3   4  -7  130.99    8.20
   4  -4   7  105.69    6.40
   4  -4   7   95.99    6.40
   4  -4   7  104.59    8.50
  -4   4  -7   89.59    6.80
  -4   4  -7   93.49    6.70
  -4   4  -7  105.59    6.60
  -4   4  -7  104.09    6.90
   4   4   7  105.99    6.40
   4   4   7   99.19    6.80
   4   4   7   96.79    6.00
   5  -4   7  170.08    8.90
   5  -4   7  166.28   10.00
  -5   4  -7  181.58    9.30
  -5   4  -7  181.38    9.10
  -5   4  -7  202.58   12.60
   5   4   7  166.58    9.30
   9   5  -7  150.18    8.40
  -9   5   7  154.88    8.60
  -9   5   7  171.68    7.90
   9   5  -7  158.18    8.10
   8  -5  -7  247.58   15.90
   8   5  -7  247.88   12.30
  -8   5   7  255.87   12.90
   8   5  -7  262.77   12.50
  -8   5   7  283.67   13.00
   8   5  -7  266.57   12.60
   7  -5  -7  411.76   21.10
  -7  -5   7  405.96   37.90
  -7   5   7  408.66   19.50
   7   5  -7  439.56   19.30
  -7   5   7  418.46   19.20
  -7   5   7  424.26   20.50
  -7   5   7  423.76   19.00
   7   5  -7  427.26   19.10
   7   5  -7  436.26   19.30
   6  -5  -7  120.59    8.80
  -6  -5   7   95.89   17.70
  -6  -5   7  119.19    9.00
   6   5  -7  117.69    6.70
  -6   5   7  105.99    7.20
  -6   5   7   98.09    7.70
   6   5  -7  118.39    6.90
  -6   5   7  116.19    8.00
   6   5  -7  108.19    7.00
  -6   5   7  114.69    6.80
   5  -5  -7 1200.58   49.99
  -5  -5   7 1128.59   50.49
   5  -5  -7  971.40   58.89
   5   5  -7 1084.29   46.90
   5   5  -7 1072.49   46.10
  -5   5   7 1165.78   47.10
  -5   5   7 1096.89   47.00
  -5   5   7 1138.09   46.70
  -5   5   7 1088.09   48.30
  -4  -5   7   48.80    5.00
  -4  -5   7   43.30    8.60
   4  -5  -7   40.60    3.60
   4   5  -7   52.39    4.10
  -4   5   7   49.70    4.50
  -4   5   7   44.80    4.40
  -4   5   7   52.29    7.10
   4   5  -7   52.49    4.70
   3  -5  -7  564.34   38.60
  -3  -5   7  600.74   50.09
  -3  -5   7  559.04   33.70
  -3  -5   7  619.54   31.20
  -3   5   7  638.84   27.20
   3   5  -7  642.84   27.30
  -3   5   7  625.04   27.40
  -3   5   7  562.04   28.80
   3   5  -7  613.74   26.60
  -3   5   7  631.54   27.40
  -2  -5   7   45.30   12.80
   2  -5  -7   30.30    8.90
  -2  -5   7   33.30    5.00
  -2  -5   7   43.50    5.70
  -2   5   7   46.40    4.30
   2   5  -7   38.20    3.90
  -2   5   7   50.99    4.50
   2   5  -7   57.19    5.10
  -2   5   7   45.20    5.00
  -2   5   7   43.80    3.90
  -1  -5   7   84.79   25.80
   1   5  -7   90.29    6.20
  -1   5   7  100.59   10.60
  -1   5   7   89.89    6.30
  -1   5   7   89.19    6.30
   1   5  -7   96.09    6.90
   0  -5  -7   63.39   12.50
   0  -5   7   49.30    5.70
   0  -5   7   46.00    5.90
   0  -5   7   50.89   12.10
   0   5   7   51.19    4.60
   0   5   7   54.59    4.50
   0   5   7   49.20    5.10
   0   5  -7   48.00    4.60
   0   5  -7   58.19    5.30
   1  -5   7 1817.72   80.59
   1  -5   7 1861.11   81.09
   1   5   7 1889.61   77.39
   1   5   7 2149.98   79.19
  -1   5  -7 1874.71   78.49
   1   5   7 1887.61   79.29
  -1   5  -7 1840.82   78.59
   1   5   7 1825.22   77.59
  -1   5  -7 1866.61   78.39
   2  -5   7  524.05   27.50
   2  -5   7  580.14   28.00
   2  -5   7  582.54   25.30
   2   5   7  542.85   25.70
   2   5   7  634.24   25.70
  -2   5  -7  616.24   30.30
   2   5   7  565.44   25.10
  -2   5  -7  594.24   26.40
   2   5   7  609.74   27.00
  -2   5  -7  534.15   27.70
   3  -5   7  258.37   13.70
   3  -5   7  246.98   14.40
   3  -5   7  228.88   16.30
  -3   5  -7  259.77   12.60
  -3   5  -7  257.07   12.80
   3   5   7  214.98   15.90
  -3   5  -7  250.87   12.80
   3   5   7  245.08   11.90
   3   5   7  245.48   12.70
   3   5   7  255.77   11.90
   4  -5   7    5.40    1.30
   4  -5   7   10.40    2.20
   4  -5   7    8.90    1.80
  -4   5  -7    9.00    1.80
  -4   5  -7   10.40    1.90
   4   5   7    6.50    1.40
   4   5   7    8.90    1.80
  -8  -6   7   28.30    6.70
  -8   6   7   31.40    2.80
  -8   6   7   26.80    3.20
  -7  -6   7  245.48   23.80
   7   6  -7  230.58   12.10
  -7   6   7  256.37   12.30
   7   6  -7  217.98   11.60
  -7   6   7  242.58   11.10
  -7   6   7  241.58   11.30
  -6  -6   7  316.47   33.00
   6   6  -7  308.77   14.50
  -6   6   7  329.47   15.90
   6   6  -7  314.37   14.70
  -6   6   7  312.57   16.50
  -6   6   7  316.27   15.10
  -6   6   7  328.77   15.10
  -5  -6   7  414.06   37.30
  -5  -6   7  472.15   22.70
  -5   6   7  474.05   22.30
  -5   6   7  515.45   21.40
  -5   6   7  474.35   21.40
  -5   6   7  504.55   21.10
   5   6  -7  456.05   20.60
   5   6  -7  456.75   20.90
  -4  -6   7  128.19    9.30
  -4  -6   7  123.99   19.20
  -4  -6   7  138.09   10.70
   4  -6  -7  139.69    7.40
  -4   6   7  125.89    7.50
   4   6  -7  117.89    7.10
  -4   6   7  125.29    7.30
  -4   6   7  113.09    8.70
  -4   6   7  131.49    8.30
  -3  -6   7   64.99    5.80
  -3  -6   7   61.09    6.40
   3  -6  -7   71.29    4.40
  -3  -6   7   61.19   13.40
  -3   6   7   67.19    5.00
  -3   6   7   61.59    5.00
   3   6  -7   64.49    5.00
  -3   6   7   66.19    5.50
  -3   6   7   58.19    4.50
  -2  -6   7  302.67   17.60
  -2  -6   7  302.37   16.50
  -2  -6   7  284.77   30.00
  -2   6   7  337.97   15.20
  -2   6   7  316.37   15.20
  -2   6   7  306.67   14.80
  -2   6   7  318.57   16.20
   2   6  -7  302.27   14.60
  -1  -6   7  336.47   18.80
  -1  -6   7  325.77   31.60
  -1  -6   7  342.07   18.00
  -1   6   7  349.57   17.30
  -1   6   7  364.66   16.40
   1   6  -7  330.37   15.90
  -1   6   7  331.37   15.90
   0  -6   7   44.60    5.20
   0  -6   7   49.20    5.00
   0  -6   7   46.70   10.50
   0   6   7   44.20    3.80
   0   6   7   51.29    3.80
   0   6  -7   46.80    4.40
   0   6  -7   46.00    7.70
   0   6   7   47.60    4.20
   0   6   7   49.10    4.50
   1  -6   7   96.19    7.30
   1  -6   7  101.99    7.80
   1   6   7  110.39    6.60
   1   6   7   98.49    6.70
  -1   6  -7  101.69    6.80
  -1   6  -7  101.59    8.30
   1   6   7   96.19    6.80
   1   6   7  101.89    5.90
  -1   6  -7  103.59    6.70
   2  -6   7  191.18   10.90
   2  -6   7  189.28   10.70
   2   6   7  186.18    9.40
   2   6   7  201.68   10.30
  -2   6  -7  188.28    9.90
  -2   6  -7  196.48    9.70
   2   6   7  191.38    9.20
   3  -6   7  126.39    7.50
   3  -6   7  125.29    7.50
   3   6   7  117.49    6.40
   3   6   7  137.09    7.80
  -3   6  -7  118.39    6.90
   3   6   7  132.59    6.10
  -3   6  -7  132.69    6.60
  -6  -7   7  275.37   22.10
  -6   7   7  330.87   14.70
  -5   7   7  797.02   33.60
  -5   7   7  794.32   33.20
  -4   7   7  182.48   10.20
  -4   7   7  165.18    8.40
  -4   7   7  170.78    8.70
  -3  -7   7  133.19   16.60
  -3  -7   7  173.98    9.90
  -3  -7   7  158.88    8.90
  -3   7   7  163.68    8.00
  -3   7   7  162.58    9.90
  -3   7   7  153.88    9.30
  -3   7   7  162.18    8.30
  -2  -7   7   14.50    5.70
  -2  -7   7   23.40    3.30
  -2   7   7   26.70    3.10
  -2   7   7   22.60    2.20
  -2   7   7   19.00    2.30
  -1  -7   7   85.29    5.70
  -1  -7   7   98.99    7.20
  -1   7   7   79.59    5.60
  -1   7   7   84.89    4.90
  -1   7   7   79.89    5.00
   0  -7   7  373.96   17.90
   0  -7   7  342.07   18.00
   0   7   7  393.46   16.90
   0   7   7  353.86   16.40
   0   7   7  403.56   17.00
   1   7   7  234.98   11.90
   1   7   7  252.27   11.80
   1   7   7  232.38   10.90
  11   0  -8  741.23   34.20
 -11   0   8  747.93   32.40
  11   0  -8  707.53   31.70
  10   0  -8   89.49    6.50
  10   0  -8   90.49    7.80
  10   0  -8   88.69    5.70
 -10   0   8   85.99    6.90
   9   0  -8   -2.80    2.50
  -9   0   8    5.30    2.00
   9   0  -8    3.00    3.10
   9   0  -8    3.10    1.50
   9   0  -8    1.40    1.10
   9   0  -8    6.60    2.80
   8   0  -8  269.77   14.90
  -8   0   8  254.07   15.10
   8   0  -8  267.37   19.10
   8   0  -8  258.57   13.40
   8   0  -8  264.87   13.70
   8   0  -8  264.87   14.00
  -7   0   8   37.50    4.20
   7   0  -8   40.60    4.50
   7   0  -8   46.80    4.90
  -7   0   8   45.30    5.00
   7   0  -8   38.00    5.90
   7   0  -8   40.10    4.10
   7   0  -8   50.39    4.70
   6   0  -8  409.16   20.30
   6   0  -8  377.16   18.70
  -6   0   8  404.96   20.80
   6   0  -8  378.56   18.90
   6   0  -8  422.26   19.30
  -6   0   8  357.56   19.00
   5   0  -8  226.18   11.60
  -5   0   8  196.38   11.20
   5   0  -8  208.48   11.50
   5   0  -8  199.78   13.80
  -5   0   8  202.88   13.50
   5   0  -8  207.68   15.40
   4   0  -8  605.44   28.70
  -4   0   8  622.84   29.40
  -4   0   8  625.14   30.00
   4   0  -8  585.84   27.10
   4   0  -8  558.04   30.10
  -4   0   8  583.04   27.20
   4   0  -8  632.24   27.30
   4   0  -8  595.04   27.30
  -3   0   8 1263.97   54.09
   3   0  -8 1293.77   55.69
  -3   0   8 1285.47   56.19
   3   0  -8 1291.67   53.99
   3   0  -8 1257.97   53.99
   3   0  -8 1250.87   57.59
   3   0  -8 1297.47   54.19
   2   0  -8    9.10    2.50
  -2   0   8   13.40    2.60
   2   0  -8   19.60    2.80
   2   0  -8   16.90    3.00
  -2   0   8   16.50    3.60
  -2   0   8   14.90    4.00
  -2   0   8   16.10    8.10
   1   0  -8 2587.44  101.59
   1   0  -8 2478.45  101.39
   1   0  -8 2554.64  101.59
  -1   0   8 2458.55  101.19
   1   0  -8 2494.65  103.29
  -1   0   8 2479.05  103.89
  -1   0   8 2222.78  102.99
   0   0  -8   56.79    5.30
   0   0  -8   66.09    6.30
   0   0   8   59.49    7.30
   0   0   8   54.69    5.80
   0   0  -8   59.59    5.50
   0   0  -8   51.99    5.00
   0   0   8   44.90    5.60
  -1   0  -8 3393.36  137.19
   1   0   8 3317.57  136.69
   1   0   8 3430.76  139.79
   1   0   8 3182.08  138.09
  -1   0  -8 3419.36  137.09
  -1   0  -8 3379.76  139.09
  -1   0  -8 3441.16  137.39
  -2   0  -8 3623.04  147.39
  -2   0  -8 3789.52  150.98
  -2   0  -8 3645.74  147.59
  -2   0  -8 3741.73  149.88
   2   0   8 3707.83  150.48
   2   0   8 3342.37  153.88
   2   0   8 3600.64  147.09
  -3   0  -8  286.57   16.10
   3   0   8  294.97   16.80
  -3   0  -8  290.87   14.20
  -3   0  -8  255.97   18.80
   3   0   8  278.67   13.90
  -3   0  -8  283.17   14.50
  -4   0  -8    1.20    1.30
   4   0   8    0.30    1.30
  -4   0  -8    0.30    0.90
   4   0   8    0.40    1.10
   5   0   8  324.47   16.30
  -5   0  -8  346.27   17.30
   5   0   8  345.27   17.60
  -6   0  -8   56.59    3.90
   6   0   8   56.69    4.30
 -11  -1   8   75.39    5.20
  11  -1  -8   68.49    6.10
  11  -1  -8   68.19    5.80
  11   1  -8   88.49    5.50
 -11   1   8   70.49    5.50
  11   1  -8   77.89    4.60
  10  -1  -8  330.67   17.30
  10  -1  -8  341.37   18.40
 -10  -1   8  336.37   17.60
  10   1  -8  328.77   18.70
 -10   1   8  367.96   18.40
  10   1  -8  359.86   16.30
  10   1  -8  387.26   17.60
  10   1  -8  370.16   17.70
 -10   1   8  354.36   16.00
  -9  -1   8  355.36   19.00
   9  -1  -8  383.66   16.70
   9  -1  -8  392.26   19.20
   9  -1  -8  365.56   20.10
  -9   1   8  366.26   19.70
   9   1  -8  387.56   19.20
   9   1  -8  394.96   18.50
   9   1  -8  382.26   17.90
   9   1  -8  360.76   18.10
  -9   1   8  361.06   17.80
   8  -1  -8  130.69    8.00
  -8  -1   8  120.99   18.90
   8  -1  -8  125.69    8.90
  -8  -1   8  136.79    9.20
   8  -1  -8  114.89    7.50
   8   1  -8  123.59    8.80
   8   1  -8  131.89    8.30
  -8   1   8  128.39    9.40
  -8   1   8  122.09    8.90
   8   1  -8  128.09    8.00
   8   1  -8  118.19    8.10
   7  -1  -8 1260.37   56.09
   7  -1  -8 1265.07   54.59
   7  -1  -8 1255.37   52.49
   7  -1  -8 1284.07   52.89
  -7  -1   8 1268.37   54.79
  -7  -1   8 1233.38   73.79
   7  -1  -8 1168.38   52.89
   7   1  -8 1272.67   53.29
   7   1  -8 1261.87   54.49
   7   1  -8 1239.98   52.99
  -7   1   8 1266.07   53.59
   7   1  -8 1294.47   53.19
  -7   1   8 1186.58   55.19
  -6  -1   8 4313.97  173.88
   6  -1  -8 4199.58  173.68
   6  -1  -8 3983.10  171.78
   6  -1  -8 4287.17  175.48
   6  -1  -8 4492.95  172.28
   6  -1  -8 3891.71  171.48
  -6  -1   8 4445.96  198.68
  -6   1   8 4286.37  174.68
   6   1  -8 4283.87  172.08
   6   1  -8 4298.37  172.08
   6   1  -8 4241.68  173.48
  -6   1   8 4450.65  172.98
   6   1  -8 4544.65  176.28
  -6   1   8 4008.70  175.28
   5  -1  -8 2744.43  108.69
   5  -1  -8 2533.35  111.09
  -5  -1   8 2631.64  109.89
   5  -1  -8 2590.64  108.09
   5  -1  -8 2553.24  107.99
   5  -1  -8 2542.15  109.59
  -5  -1   8 2964.90  134.29
   5   1  -8 2686.43  111.19
  -5   1   8 2679.43  111.69
   5   1  -8 2643.54  107.99
   5   1  -8 2659.33  108.19
  -5   1   8 2524.45  111.79
  -4  -1   8  185.18   22.70
  -4  -1   8  189.08   11.80
  -4  -1   8  184.48   11.50
   4  -1  -8  224.18   10.90
   4  -1  -8  185.88   11.60
   4  -1  -8  193.28   10.80
   4  -1  -8  190.68   10.80
   4  -1  -8  180.18   12.60
   4   1  -8  176.38   10.40
   4   1  -8  189.38   10.50
  -4   1   8  167.58    8.90
  -4   1   8  189.18   11.00
   4   1  -8  203.98   11.90
  -4   1   8  194.78   12.60
   4   1  -8  188.28   10.60
  -4   1   8  168.68   12.70
   3  -1  -8  268.07   14.00
   3  -1  -8  280.67   13.90
  -3  -1   8  286.87   28.30
  -3  -1   8  248.48   14.90
   3  -1  -8  274.37   14.10
   3  -1  -8  263.77   15.10
   3  -1  -8  263.57   16.50
   3   1  -8  275.67   14.00
   3   1  -8  243.88   14.70
  -3   1   8  264.67   16.50
   3   1  -8  261.77   13.70
   3   1  -8  271.57   13.80
  -3   1   8  252.97   14.20
  -3   1   8  259.87   15.70
  -3   1   8  275.87   12.10
  -2  -1   8  685.13   32.10
   2  -1  -8  674.73   32.00
  -2  -1   8  671.43   34.40
   2  -1  -8  697.73   30.30
   2  -1  -8  670.43   30.40
  -2  -1   8  618.94   32.70
   2  -1  -8  682.93   30.40
  -2  -1   8  741.13   50.69
  -2   1   8  660.73   28.20
   2   1  -8  692.93   30.40
   2   1  -8  716.63   30.70
  -2   1   8  694.83   33.80
  -2   1   8  663.33   32.70
  -2   1   8  678.33   30.90
   2   1  -8  631.44   30.20
   2   1  -8  655.53   31.80
  -1  -1   8  141.69   12.20
   1  -1  -8  133.99    8.70
  -1  -1   8  138.69   19.70
   1  -1  -8  153.68   10.90
  -1  -1   8  131.89   10.30
   1  -1  -8  135.69    8.70
  -1   1   8  118.39    6.80
   1   1  -8  142.09    8.90
   1   1  -8  138.29    9.70
  -1   1   8  142.89   11.10
  -1   1   8  128.69    8.90
   1   1  -8  135.09    9.70
  -1   1   8  128.29    9.30
   1   1  -8  136.19    8.60
   0  -1  -8 2492.35  102.89
   0  -1   8 2596.54  125.89
   0  -1  -8 2352.86  100.39
   0  -1  -8 2410.96  100.69
   0  -1   8 2589.94  107.79
   0  -1  -8 2390.16  100.79
   0  -1   8 2557.64  103.09
   0   1  -8 2420.96  102.79
   0   1  -8 2443.16  101.29
   0   1   8 2428.76  101.29
   0   1  -8 2527.55  101.29
   0   1  -8 2513.15  101.19
   0   1   8 2291.17  103.09
   0   1   8 2335.77  103.59
   1  -1   8   10.30    2.90
   1  -1   8   14.20    5.90
  -1  -1  -8    8.10    2.30
  -1  -1  -8   13.60    2.90
  -1  -1  -8    1.20    3.20
   1  -1   8    8.50    3.00
  -1   1  -8   12.50    2.90
  -1   1  -8    6.80    2.30
  -1   1  -8    4.20    2.10
   1   1   8    5.20    1.70
  -1   1  -8   12.10    2.90
   1   1   8    6.50    3.70
   1   1   8    7.40    2.40
  -2  -1  -8  679.93   31.80
  -2  -1  -8  676.73   29.10
   2  -1   8  629.34   37.00
   2  -1   8  648.84   31.80
   2   1   8  657.33   32.80
  -2   1  -8  690.73   35.50
  -2   1  -8  678.53   32.00
   2   1   8  644.04   32.40
  -2   1  -8  687.73   30.30
   2   1   8  631.84   30.10
  -3  -1  -8  248.48   11.90
   3  -1   8  245.48   14.70
   3  -1   8  271.47   15.30
  -3  -1  -8  261.87   14.80
  -3   1  -8  262.97   13.80
  -3   1  -8  253.97   14.90
   3   1   8  255.57   15.60
  -3   1  -8  255.67   14.00
   3   1   8  249.38   13.40
  -3   1  -8  266.67   13.60
  -4  -1  -8  158.88   10.00
   4  -1   8  165.28   10.60
   4  -1   8  158.78   10.10
  -4   1  -8  158.18   10.10
   4   1   8  172.28   11.20
  -4   1  -8  161.38    9.30
   4   1   8  154.68    8.80
  -4   1  -8  162.78   10.50
  -4   1  -8  161.78    8.90
   5  -1   8   69.69    5.10
  -5  -1  -8   70.89    5.10
   5  -1   8   66.59    5.50
   5   1   8   64.49    4.90
  -5   1  -8   69.79    4.40
  -5   1  -8   63.99    5.30
   5   1   8   69.19    5.80
   6  -1   8  322.57   13.20
   6  -1   8  263.07   14.60
  -6  -1  -8  302.47   14.10
  -6   1  -8  272.07   15.00
   6   1   8  308.17   14.30
 -11  -2   8   57.79    3.60
  11  -2  -8   57.29    5.20
  11   2  -8   58.99    3.60
 -11   2   8   66.39    5.50
  11   2  -8   65.19    4.50
  10  -2  -8  185.18   10.00
 -10  -2   8  201.28   12.30
 -10  -2   8  181.98   10.50
  10  -2  -8  189.58   11.50
  10   2  -8  189.28    9.70
  10   2  -8  167.18   10.10
  10   2  -8  225.88   12.50
 -10   2   8  183.48    9.80
  10   2  -8  187.48   10.00
 -10   2   8  192.38   11.30
   9  -2  -8   30.10    4.50
  -9  -2   8   18.90    7.50
   9  -2  -8   25.60    3.40
  -9  -2   8   28.00    3.30
   9   2  -8   26.90    3.60
   9   2  -8   29.00    3.10
   9   2  -8   30.20    3.50
  -9   2   8   22.50    3.30
  -9   2   8   31.50    4.10
   9   2  -8   27.50    3.60
  -8  -2   8   19.10    8.00
   8  -2  -8   23.10    3.70
   8  -2  -8   33.80    4.90
  -8  -2   8   25.70    3.50
   8   2  -8   28.90    3.30
   8   2  -8   30.40    3.70
   8   2  -8   21.50    3.60
  -8   2   8   27.60    4.40
  -8   2   8   33.70    3.90
   8   2  -8   32.00    3.70
   7  -2  -8  191.28   12.00
  -7  -2   8  202.28   11.80
  -7  -2   8  185.58   24.60
   7  -2  -8  207.38   13.30
   7   2  -8  212.08   11.40
  -7   2   8  192.48    9.30
   7   2  -8  186.18   14.20
   7   2  -8  208.28   11.20
  -7   2   8  208.28   13.20
   7   2  -8  179.88   11.60
   6  -2  -8  223.58   13.60
   6  -2  -8  220.48   14.70
   6  -2  -8  258.87   28.70
  -6  -2   8  233.48   13.50
   6  -2  -8  234.78   11.50
  -6  -2   8  246.28   28.00
  -6   2   8  235.38   11.30
   6   2  -8  253.07   13.80
   6   2  -8  233.48   12.50
   6   2  -8  224.98   12.40
   6   2  -8  231.98   12.60
  -6   2   8  222.08   14.60
  -6   2   8  244.68   13.50
   5  -2  -8 1633.34   68.69
   5  -2  -8 1593.64   66.09
  -5  -2   8 1658.63   68.39
   5  -2  -8 1624.04   70.29
  -5  -2   8 1712.83   93.19
   5   2  -8 1581.04   68.19
  -5   2   8 1543.95   65.79
  -5   2   8 1543.75   69.89
   5   2  -8 1582.74   66.69
  -5   2   8 1604.54   67.99
  -5   2   8 1596.04   65.59
   5   2  -8 1629.84   67.09
   5   2  -8 1555.94   66.79
   4  -2  -8  114.99   19.20
  -4  -2   8  156.08    9.90
  -4  -2   8  147.09   23.70
  -4  -2   8  149.69   10.00
   4  -2  -8  154.48   11.20
   4  -2  -8  146.69   10.10
   4   2  -8  146.09    8.80
   4   2  -8  147.09    9.00
  -4   2   8  151.78    9.70
  -4   2   8  151.58    8.40
  -4   2   8  160.08    8.20
  -4   2   8  149.19   11.10
  -4   2   8  142.09   11.60
   4   2  -8  153.38   12.80
  -3  -2   8   35.40   12.00
   3  -2  -8   33.70    4.80
   3  -2  -8   32.70    3.60
  -3  -2   8   36.10    4.60
  -3  -2   8   26.30    4.80
  -3   2   8   32.70    5.80
   3   2  -8   40.80    5.00
  -3   2   8   29.90    3.80
  -3   2   8   35.40    6.30
   3   2  -8   35.80    3.90
  -3   2   8   34.70    3.80
   3   2  -8   33.30    3.80
   3   2  -8   32.30    3.50
  -2  -2   8 1753.92  111.69
   2  -2  -8 1850.81   73.29
  -2  -2   8 1724.03   79.49
  -2  -2   8 1815.12   77.79
   2  -2  -8 1744.73   92.49
   2  -2  -8 1740.63   75.59
  -2  -2   8 1843.82   75.59
  -2   2   8 1804.42   74.99
   2   2  -8 1800.52   74.09
   2   2  -8 1798.52   73.89
   2   2  -8 1747.23   75.79
  -2   2   8 1694.13   77.59
  -2   2   8 1753.22   72.69
  -2   2   8 1721.63   74.89
  -2   2   8 1869.21   76.09
   1  -2  -8 1924.01  102.99
  -1  -2   8 2112.19   85.99
  -1  -2   8 1943.71   86.79
  -1  -2   8 2021.00   85.09
   1  -2  -8 2009.00   85.49
  -1  -2   8 2054.39   90.89
   1  -2  -8 2205.98   83.59
  -1  -2   8 2098.29  110.39
  -1   2   8 1941.71   84.49
  -1   2   8 1873.81   89.19
   1   2  -8 1953.10   85.49
   1   2  -8 2104.69   83.99
   1   2  -8 2121.19   84.29
  -1   2   8 2011.90   82.39
  -1   2   8 2058.09   87.29
   1   2  -8 1976.00   83.89
  -1   2   8 1968.30   82.09
   0  -2  -8  527.55   43.10
   0  -2   8  582.04   28.60
   0  -2   8  528.35   28.60
   0  -2   8  586.44   33.60
   0  -2  -8  601.24   25.20
   0  -2   8  607.44   47.40
   0  -2  -8  572.34   28.00
   0  -2   8  579.14   27.80
   0   2  -8  568.04   28.30
   0   2  -8  594.64   27.00
   0   2  -8  585.74   27.00
   0   2   8  594.14   28.40
   0   2   8  571.54   25.00
   0   2   8  535.05   25.00
   0   2   8  613.94   29.90
   0   2  -8  596.74   27.20
   1  -2   8 3902.61  157.68
   1  -2   8 3724.73  157.48
  -1  -2  -8 3485.25  177.88
   1  -2   8 3838.92  156.78
   1  -2   8 3753.92  164.08
  -1  -2  -8 3909.01  156.88
   1   2   8 3700.73  157.08
  -1   2  -8 3930.61  155.78
   1   2   8 3922.31  158.68
  -1   2  -8 3956.70  156.08
  -1   2  -8 3929.51  157.38
   1   2   8 3884.01  156.08
  -1   2  -8 3909.71  155.78
   1   2   8 3756.62  153.08
   2  -2   8 1190.18   51.79
   2  -2   8 1135.19   50.69
   2  -2   8 1110.59   51.49
  -2  -2  -8 1108.79   51.49
   2   2   8 1083.39   49.80
  -2   2  -8 1231.28   55.19
   2   2   8 1182.08   47.50
  -2   2  -8 1117.69   49.50
  -2   2  -8 1129.49   49.60
  -2   2  -8 1182.28   49.90
  -3  -2  -8  764.92   34.60
   3  -2   8  780.02   35.80
   3  -2   8  767.32   35.20
  -3   2  -8  739.73   34.10
  -3   2  -8  759.42   35.40
  -3   2  -8  757.92   34.00
   3   2   8  756.92   36.40
   3   2   8  729.93   34.00
  -3   2  -8  852.81   37.40
  -4  -2  -8   34.40    5.60
   4  -2   8   41.90    4.30
   4  -2   8   41.40    4.40
  -4   2  -8   46.50    4.30
   4   2   8   40.50    5.00
  -4   2  -8   46.00    4.00
  -4   2  -8   39.90    4.60
   4   2   8   38.90    3.70
  -4   2  -8   46.10    4.70
   5  -2   8  531.85   24.30
   5  -2   8  552.14   24.30
   5  -2   8  539.85   23.70
   5   2   8  548.95   25.70
   5   2   8  560.84   24.10
   5   2   8  567.94   24.60
  -5   2  -8  569.94   25.00
  -5   2  -8  502.75   24.00
  -5   2  -8  558.14   23.40
  10  -3  -8  512.65   25.00
 -10   3   8  521.95   23.70
  10   3  -8  563.64   23.50
  10   3  -8  590.74   24.30
 -10   3   8  485.95   24.80
  10   3  -8  560.64   25.30
  -9  -3   8  191.08   10.80
   9  -3  -8  175.58    9.30
  -9  -3   8  142.79   23.50
   9  -3  -8  183.28   11.40
  -9  -3   8  176.68    8.50
  -9   3   8  176.28   10.10
   9   3  -8  148.89   12.60
  -9   3   8  188.58   11.30
   9   3  -8  180.48    9.80
   9   3  -8  178.28    9.50
   9   3  -8  180.18    9.80
  -8  -3   8    8.40    2.80
  -8  -3   8    6.00    5.20
   8  -3  -8    6.70    1.90
   8  -3  -8    6.60    2.40
   8   3  -8    8.20    2.30
  -8   3   8    8.40    1.50
   8   3  -8    7.40    1.90
   8   3  -8   11.10    2.30
  -8   3   8    8.80    2.20
   8   3  -8    7.60    2.20
  -7  -3   8  836.22   36.40
   7  -3  -8  821.22   37.30
   7  -3  -8  816.12   54.89
   7  -3  -8  874.01   39.80
  -7  -3   8  855.31   40.30
  -7   3   8  837.92   35.40
  -7   3   8  897.81   39.30
  -7   3   8  838.72   39.60
   7   3  -8  797.82   36.40
   7   3  -8  869.61   36.80
   7   3  -8  819.22   36.50
   7   3  -8  811.12   37.40
  -7   3   8  843.32   35.60
  -6  -3   8 3952.40  162.28
  -6  -3   8 3980.00  166.78
   6  -3  -8 4115.09  165.88
   6  -3  -8 4062.79  163.68
   6   3  -8 4144.39  162.48
  -6   3   8 4033.60  161.58
  -6   3   8 4142.59  163.88
   6   3  -8 3877.21  165.38
   6   3  -8 3942.51  162.28
   6   3  -8 3922.51  163.38
  -6   3   8 4062.09  165.98
  -6   3   8 4022.90  161.28
  -5  -3   8 2128.39  117.79
   5  -3  -8 2178.88   91.09
   5  -3  -8 2172.88  109.09
  -5  -3   8 2090.99   89.59
   5  -3  -8 2307.57   93.49
  -5  -3   8 2259.17   94.59
   5   3  -8 2249.57   89.79
  -5   3   8 2072.89   92.89
   5   3  -8 2215.38   91.09
  -5   3   8 2185.58   88.79
  -5   3   8 2236.48   89.19
  -5   3   8 2264.87   91.29
  -5   3   8 2057.39   89.09
   5   3  -8 2105.99   89.59
   5   3  -8 2191.78   89.49
   4  -3  -8   82.49    6.90
  -4  -3   8   85.79    6.10
   4  -3  -8   79.49    7.70
   4  -3  -8   74.39   23.50
  -4  -3   8   99.19    9.00
  -4  -3   8   81.59    7.20
  -4  -3   8   91.49   16.80
  -4   3   8   91.79    8.40
   4   3  -8   76.79    6.00
   4   3  -8   79.79    5.80
  -4   3   8   79.69    6.10
   4   3  -8   68.49    6.90
  -4   3   8   67.49    8.20
   4   3  -8   85.29    6.20
  -4   3   8   82.39    5.80
  -4   3   8   83.49    5.50
   3  -3  -8 1065.29   46.40
   3  -3  -8  952.20   59.79
  -3  -3   8 1003.10   44.80
  -3  -3   8 1144.29   71.39
  -3  -3   8 1157.98   49.80
  -3  -3   8 1071.59   47.00
   3  -3  -8 1084.49   48.60
  -3   3   8 1077.79   44.90
  -3   3   8 1066.69   44.10
   3   3  -8 1027.40   45.20
   3   3  -8 1059.29   44.70
  -3   3   8 1019.40   44.40
   3   3  -8 1016.60   44.90
   3   3  -8 1006.30   46.30
  -3   3   8 1006.40   48.10
  -3   3   8  963.40   46.60
  -3   3   8 1059.09   46.20
  -2  -3   8  214.98   13.60
   2  -3  -8  219.38   13.10
  -2  -3   8  237.88   28.20
  -2  -3   8  207.28   17.60
  -2  -3   8  214.38   11.90
  -2  -3   8  227.28   15.00
   2   3  -8  209.78   13.10
  -2   3   8  217.08   11.60
   2   3  -8  215.58   11.80
  -2   3   8  216.68   11.10
  -2   3   8  220.18   13.80
  -2   3   8  223.28   13.00
  -2   3   8  234.68   14.90
   2   3  -8  224.98   12.20
   2   3  -8  209.08   11.90
  -2   3   8  212.88   11.40
  -1  -3   8  623.94   30.90
  -1  -3   8  605.74   27.40
  -1  -3   8  600.44   48.60
  -1  -3   8  574.04   34.50
   1  -3  -8  571.74   42.10
   1  -3  -8  622.44   28.60
  -1  -3   8  617.24   29.80
  -1   3   8  580.94   30.40
  -1   3   8  588.04   29.40
  -1   3   8  585.14   26.70
  -1   3   8  611.24   26.40
  -1   3   8  594.84   28.50
   1   3  -8  578.04   28.80
   1   3  -8  609.84   27.80
   1   3  -8  595.74   27.40
  -1   3   8  625.64   26.70
   1   3  -8  605.34   27.70
   0  -3   8   19.80    4.50
   0  -3  -8   28.30   10.60
   0  -3  -8   19.60    3.50
   0  -3   8   12.00    2.60
   0  -3   8   18.20    9.80
   0  -3   8   23.00    4.00
   0  -3   8   13.70    7.90
   0   3  -8   16.00    2.90
   0   3   8   21.20    3.00
   0   3   8   12.00    2.10
   0   3  -8   18.50    3.30
   0   3  -8   23.30    3.40
   0   3   8   17.50    3.00
   0   3  -8   23.80    4.40
   1  -3   8  209.18   25.40
   1  -3   8  193.18   14.20
  -1  -3  -8  198.58   38.70
   1  -3   8  218.98   13.60
   1   3   8  191.78   10.50
  -1   3  -8  213.98   12.00
  -1   3  -8  205.58   12.10
   1   3   8  206.58   12.30
   1   3   8  234.18   18.50
  -1   3  -8  206.48   12.90
   1   3   8  213.88   10.60
   2  -3   8  436.76   20.10
   2  -3   8  419.66   20.50
   2  -3   8  448.76   22.60
   2  -3   8  407.16   21.70
  -2  -3  -8  410.46   20.40
  -2   3  -8  446.16   20.90
   2   3   8  413.76   22.80
   2   3   8  441.86   18.90
   2   3   8  430.06   21.20
  -2   3  -8  438.16   21.20
  -2   3  -8  451.35   21.10
  -2   3  -8  443.66   21.90
   2   3   8  413.66   19.10
   3  -3   8  558.24   27.50
   3  -3   8  570.44   28.60
   3  -3   8  592.24   25.80
  -3   3  -8  570.44   26.30
   3   3   8  582.44   29.50
  -3   3  -8  589.74   28.70
   3   3   8  579.24   26.40
  -3   3  -8  534.75   26.90
  -3   3  -8  585.94   26.20
   4  -3   8  208.48   10.00
   4  -3   8  206.88   11.60
  -4   3  -8  226.38   12.80
   4   3   8  213.58   13.40
  -4   3  -8  219.28   11.20
  -4   3  -8  192.18   11.20
  -4   3  -8  208.58   11.60
   4   3   8  209.18   11.50
   5  -3   8   27.60    2.60
   5  -3   8   27.80    2.60
   5   3   8   28.10    3.70
  -5   3  -8   26.30    3.10
  -5   3  -8   31.20    2.40
   5   3   8   26.60    2.50
  -5   3  -8   36.60    4.30
  10  -4  -8  412.06   20.00
 -10   4   8  440.06   20.30
  10   4  -8  467.65   19.70
  10   4  -8  445.86   20.00
  -9  -4   8    2.50    3.10
   9  -4  -8    2.10    1.30
   9   4  -8    2.00    1.00
   9   4  -8    1.20    1.30
  -9   4   8    1.50    2.30
  -9   4   8    2.00    1.10
   9   4  -8    1.60    1.60
  -8  -4   8  100.79   16.40
  -8  -4   8  106.89    7.70
   8  -4  -8  108.19    8.20
  -8   4   8  124.69    9.60
   8   4  -8  112.79    6.90
  -8   4   8  111.59    7.40
   8   4  -8  108.89    6.80
   8   4  -8  102.09    7.10
   8   4  -8  107.89    7.00
   7  -4  -8   44.20    5.10
  -7  -4   8   33.60    4.90
  -7  -4   8   34.80   10.90
  -7   4   8   39.50    5.60
   7   4  -8   45.90    4.00
   7   4  -8   45.80    7.70
  -7   4   8   32.00    3.70
  -7   4   8   37.50    3.20
   7   4  -8   39.70    3.80
  -7   4   8   40.10    4.30
   6  -4  -8  194.18   12.40
  -6  -4   8  182.88   12.60
  -6  -4   8  203.58   25.40
  -6   4   8  175.08   11.00
   6   4  -8  179.18    9.90
   6   4  -8  175.28    9.80
  -6   4   8  174.08    9.40
  -6   4   8  166.48   12.30
  -6   4   8  181.48    9.80
   6   4  -8  174.78   10.00
  -6   4   8  183.28   11.90
   5  -4  -8 1259.77   59.29
   5   4  -8 1212.08   51.09
   5   4  -8 1126.79   50.89
  -5   4   8 1195.48   54.59
  -5   4   8 1271.87   51.19
  -5   4   8 1194.78   50.89
   5   4  -8 1214.78   50.89
  -4  -4   8  288.67   31.70
   4  -4  -8  256.87   25.00
  -4  -4   8  249.88   15.80
   4  -4  -8  290.67   16.80
  -4  -4   8  283.97   17.60
  -4   4   8  266.47   13.90
   4   4  -8  269.87   13.90
  -4   4   8  265.77   13.70
  -4   4   8  277.67   15.20
   4   4  -8  273.97   13.70
  -4   4   8  276.17   13.50
  -3  -4   8  155.98   11.00
  -3  -4   8  176.38   24.40
  -3  -4   8  172.28   12.70
   3  -4  -8  174.18   21.30
  -3   4   8  161.88    9.70
  -3   4   8  168.18   12.60
  -3   4   8  176.68    9.70
   3   4  -8  164.88    9.80
  -3   4   8  166.88    9.20
  -3   4   8  158.98   12.90
   3   4  -8  178.08    9.70
  -3   4   8  175.28   10.90
   3   4  -8  171.88    9.80
  -2  -4   8 1217.38   52.79
  -2  -4   8 1092.99   50.49
  -2  -4   8 1218.08   74.09
   2  -4  -8 1016.00   62.99
  -2  -4   8 1207.28   75.69
  -2   4   8 1208.08   53.09
  -2   4   8  964.20   57.59
  -2   4   8 1105.99   47.80
   2   4  -8 1041.30   48.60
   2   4  -8 1138.59   48.30
  -2   4   8 1172.58   49.70
  -2   4   8 1102.59   47.70
   2   4  -8 1152.78   48.10
  -2   4   8 1147.29   47.50
   1  -4  -8  325.47   29.10
  -1  -4   8  374.06   19.70
  -1  -4   8  346.27   20.30
  -1  -4   8  382.76   36.60
  -1   4   8  357.56   16.50
  -1   4   8  332.77   16.80
  -1   4   8  334.77   16.60
   1   4  -8  353.46   17.30
   1   4  -8  335.17   19.30
  -1   4   8  323.27   19.70
  -1   4   8  348.67   18.30
   1   4  -8  348.87   17.40
   0  -4   8  679.43   51.79
   0  -4   8  719.43   34.20
   0  -4   8  702.73   34.60
   0   4  -8  724.53   32.00
   0   4   8  711.63   30.60
   0   4  -8  733.73   31.90
   0   4  -8  683.73   32.40
   0   4   8  679.23   34.40
   0   4  -8  710.73   32.00
   0   4   8  733.43   31.00
   0   4   8  717.43   31.20
   1  -4   8  903.11   39.80
   1  -4   8  767.22   55.69
   1  -4   8  790.92   39.30
   1   4   8  834.82   37.90
  -1   4  -8  871.21   37.70
  -1   4  -8  926.91   42.00
   1   4   8  858.31   38.30
   1   4   8  848.22   40.20
  -1   4  -8  875.11   38.50
  -1   4  -8  888.81   39.40
   1   4   8  876.71   36.20
   1   4   8  831.72   37.00
   2  -4   8 1670.73   71.99
   2  -4   8 1589.64   71.29
   2   4   8 1591.64   72.39
   2   4   8 1714.73   70.79
   2   4   8 1707.83   70.39
  -2   4  -8 1757.22   71.49
  -2   4  -8 1670.93   71.59
  -2   4  -8 1764.02   70.29
   2   4   8 1698.43   68.49
  -2   4  -8 1702.33   70.39
   3  -4   8  552.44   25.90
   3  -4   8  556.24   29.50
   3  -4   8  591.94   25.30
  -3   4  -8  574.44   26.10
   3   4   8  577.54   24.10
  -3   4  -8  593.74   26.40
  -3   4  -8  599.74   25.90
  -3   4  -8  601.04   29.00
   4  -4   8  166.18    9.00
   4   4   8  169.58    8.90
  -4   4  -8  169.18    8.80
  -4   4  -8  161.48    9.70
  -4   4  -8  167.88    8.80
  -9  -5   8   70.19    9.90
  -9   5   8   71.39    5.30
   9   5  -8   77.19    4.30
   9   5  -8   75.69    4.60
   8  -5  -8    4.50    1.70
  -8  -5   8    6.30    4.10
  -8   5   8    5.40    1.40
  -8   5   8    2.90    1.00
   8   5  -8    4.00    1.90
   8   5  -8    3.30    1.20
   8   5  -8    4.00    1.40
   7  -5  -8 1203.38   53.69
  -7  -5   8 1079.19   69.99
  -7  -5   8 1316.27   56.19
   7   5  -8 1248.58   51.89
  -7   5   8 1315.47   53.49
  -7   5   8 1371.76   54.19
   7   5  -8 1250.67   51.79
   7   5  -8 1219.08   51.69
  -6  -5   8 1386.16   60.29
   6  -5  -8 1315.87   59.49
  -6  -5   8 1381.96   80.89
  -6   5   8 1442.46   57.29
   6   5  -8 1368.56   57.19
   6   5  -8 1361.56   57.29
  -6   5   8 1370.26   57.49
  -6   5   8 1448.96   56.99
   6   5  -8 1300.37   57.99
  -6   5   8 1458.05   58.99
  -5  -5   8  681.63   50.59
  -5  -5   8  624.44   31.00
  -5   5   8  651.03   27.80
   5   5  -8  639.44   28.20
  -5   5   8  621.84   29.40
   5   5  -8  618.64   28.80
  -5   5   8  646.54   28.10
   5   5  -8  636.54   28.10
  -5   5   8  628.74   31.20
  -4  -5   8  418.26   22.40
  -4  -5   8  364.46   36.70
  -4  -5   8  402.56   19.90
   4   5  -8  428.06   19.10
   4   5  -8  437.06   19.50
  -4   5   8  413.86   20.50
  -4   5   8  415.66   18.90
  -4   5   8  421.06   19.40
  -3  -5   8  425.16   22.90
  -3  -5   8  425.86   21.10
  -3  -5   8  378.56   37.60
  -3   5   8  465.85   20.00
   3   5  -8  436.46   19.90
  -3   5   8  408.76   19.60
   3   5  -8  421.96   19.40
  -3   5   8  409.96   20.70
  -3   5   8  394.06   19.00
  -2  -5   8   63.59    6.20
  -2  -5   8   72.79    7.20
  -2  -5   8   77.39   15.50
  -2   5   8   68.49    4.90
  -2   5   8   73.09    6.00
  -2   5   8   63.39    5.30
  -2   5   8   64.39    5.80
   2   5  -8   67.89    5.30
   2   5  -8   75.79    5.70
   2   5  -8   67.99    6.10
  -1  -5   8  190.68   24.20
  -1  -5   8  191.38   11.90
  -1  -5   8  194.28   12.80
  -1   5   8  183.78    9.60
   1   5  -8  176.28   10.40
   1   5  -8  158.08   13.10
  -1   5   8  183.48   11.00
   1   5  -8  187.38   10.20
  -1   5   8  189.08    9.90
  -1   5   8  172.78   10.00
   0  -5   8  142.99   10.50
   0  -5   8  150.78   10.20
   0   5   8  149.69    8.50
   0   5  -8  147.09    8.90
   0   5   8  151.88    9.40
   0   5   8  145.99    7.90
   0   5  -8  154.18    9.10
   0   5   8  154.18    8.30
   0   5  -8  152.88    9.90
   1  -5   8  166.68   11.00
   1  -5   8  170.48   11.00
   1   5   8  191.48   10.40
  -1   5  -8  175.48    9.80
   1   5   8  168.68   10.00
  -1   5  -8  176.08    9.70
   1   5   8  163.08    9.60
  -1   5  -8  215.68   12.00
   1   5   8  185.38    9.00
   2  -5   8   56.09    4.90
   2  -5   8   51.49    4.70
   2   5   8   57.09    3.80
  -2   5  -8   48.30    5.00
  -2   5  -8   55.09    4.30
   2   5   8   59.99    4.60
  -2   5  -8   53.19    5.30
   2   5   8   55.89    3.40
   3  -5   8  423.26   19.90
   3  -5   8  430.36   19.30
  -3   5  -8  465.95   21.10
  -3   5  -8  429.26   19.50
   3   5   8  406.76   17.90
   3   5   8  473.45   20.30
  -7   6   8  118.59    6.80
  -7   6   8  130.09    7.00
  -6  -6   8   56.09   10.90
   6   6  -8   83.29    6.60
  -6   6   8   65.89    4.40
  -6   6   8   72.39    4.20
  -6   6   8   73.09    5.00
  -5  -6   8   11.70    4.10
  -5  -6   8    6.10    4.40
  -5   6   8   12.00    2.20
   5   6  -8    9.70    3.40
  -5   6   8    5.60    3.80
  -5   6   8   11.00    1.70
  -5   6   8    9.40    2.20
  -4  -6   8  663.13   30.00
  -4  -6   8  683.33   31.40
  -4   6   8  739.23   29.50
  -4   6   8  700.33   30.40
  -4   6   8  641.84   29.90
   4   6  -8  659.13   29.20
  -3  -6   8  321.87   18.90
  -3  -6   8  330.07   15.30
  -3  -6   8  272.57   27.70
  -3   6   8  326.57   14.30
  -3   6   8  311.77   15.10
  -3   6   8  303.27   14.70
  -3   6   8  312.67   15.60
   3   6  -8  291.97   15.80
   3   6  -8  290.17   14.50
  -2  -6   8  312.77   16.40
   2   6  -8  323.67   15.80
   2   6  -8  341.97   17.60
  -2   6   8  329.87   15.60
  -2   6   8  360.86   16.70
  -2   6   8  360.06   16.00
  -2   6   8  322.67   15.70
  -1  -6   8  129.09    8.10
  -1  -6   8  125.89    8.80
  -1   6   8  119.79    6.80
  -1   6   8  121.09    7.60
  -1   6   8  127.39    7.70
  -1   6   8  126.69    6.90
   1   6  -8  117.59    7.40
   0  -6   8  334.17   16.30
   0  -6   8  312.87   16.60
   0   6  -8  322.77   15.60
   0   6   8  333.87   14.90
   0   6   8  358.56   16.00
   0   6  -8  301.77   15.60
   0   6   8  331.87   14.60
   1  -6   8  463.55   20.40
   1  -6   8  461.55   22.50
   1   6   8  406.36   19.40
  -1   6  -8  409.56   18.80
   1   6   8  387.06   18.60
   1   6   8  424.46   19.10
   2  -6   8 1149.89   47.80
   2  -6   8 1127.59   47.90
   2   6   8 1193.08   46.50
   2   6   8 1164.28   47.70
  -4  -7   8  228.38   18.60
  -4   7   8  238.78   11.40
  -4   7   8  253.97   10.70
  -3  -7   8  256.17   11.90
  -3   7   8  248.98   11.10
  -3   7   8  197.98   11.60
  -2  -7   8    9.70    1.70
  -2  -7   8    6.70    1.30
  -2   7   8    7.80    1.30
  -2   7   8    9.10    1.50
  11   0  -9  701.93   29.30
 -11   0   9  656.03   29.60
  10   0  -9  112.99    8.10
 -10   0   9   85.49    8.00
  10   0  -9   91.09    8.90
   9   0  -9  216.88   13.70
   9   0  -9  241.58   12.90
   9   0  -9  214.18   10.90
  -9   0   9  225.08   13.10
   9   0  -9  201.58   11.80
   8   0  -9  779.82   36.60
   8   0  -9  772.52   35.00
  -8   0   9  791.02   35.70
   8   0  -9  724.63   33.00
   8   0  -9  747.33   33.30
   8   0  -9  748.23   35.00
   7   0  -9   25.20    3.20
   7   0  -9   27.50    4.10
   7   0  -9   21.90    3.70
  -7   0   9   30.50    4.30
   7   0  -9   24.50    3.70
   6   0  -9  172.28   10.40
   6   0  -9  150.08   12.10
   6   0  -9  178.38   10.40
  -6   0   9  172.18   11.80
  -6   0   9  164.88    9.70
   6   0  -9  201.28   10.50
   6   0  -9  193.38   11.80
   5   0  -9   42.50    4.90
  -5   0   9   31.60    3.80
   5   0  -9   25.80    5.10
   5   0  -9   37.10    3.80
   5   0  -9   32.60    4.20
   5   0  -9   36.00    4.20
  -5   0   9   36.80    4.70
   4   0  -9  351.66   18.70
   4   0  -9  346.27   17.40
  -4   0   9  319.87   16.60
   4   0  -9  339.67   17.60
  -4   0   9  349.57   19.10
   4   0  -9  356.96   17.20
   3   0  -9  394.86   19.40
   3   0  -9  409.06   19.70
  -3   0   9  392.46   19.00
   3   0  -9  385.76   22.90
  -3   0   9  406.86   21.50
   3   0  -9  401.06   21.00
  -2   0   9   33.80    3.80
   2   0  -9   32.20    4.40
  -2   0   9   30.00    4.50
   2   0  -9   27.90    3.70
   2   0  -9   27.80    4.00
  -2   0   9   30.00    4.70
   2   0  -9   38.10    4.30
  -1   0   9 1006.70   47.60
  -1   0   9  988.80   45.30
   1   0  -9 1092.29   46.50
   1   0  -9 1124.99   48.50
  -1   0   9 1125.09   48.90
   1   0  -9 1097.19   46.30
  -1   0   9  977.60   51.09
   1   0  -9 1136.39   46.60
   0   0  -9   95.49    7.30
   0   0   9  102.89    6.70
   0   0   9   91.19   12.50
   0   0   9  123.49    9.10
   0   0  -9  101.29    8.20
   0   0  -9  107.49    8.90
   0   0   9   78.49    7.90
   0   0  -9  107.09    7.20
   1   0   9   74.39    5.40
  -1   0  -9   74.99    6.60
  -1   0  -9   88.29    8.60
   1   0   9   76.89    8.40
  -2   0  -9   15.30    2.30
  -2   0  -9    8.90    2.30
  -2   0  -9   19.90    6.30
   2   0   9   16.60    3.50
  -2   0  -9    9.00    2.50
   3   0   9  158.08   10.50
   3   0   9  170.38   10.10
  -3   0  -9  152.38    9.60
  -3   0  -9  157.88   10.00
  -4   0  -9  497.45   22.80
   4   0   9  501.35   22.80
   4   0   9  490.75   23.40
  -5   0  -9   37.10    2.90
   5   0   9   30.60    3.30
   5   0   9   39.60    3.90
  11  -1  -9   70.89    6.90
 -11  -1   9   65.49    5.00
  11  -1  -9   71.79    4.50
 -11   1   9   68.89    5.10
  11   1  -9   72.29    4.80
  10  -1  -9   45.80    4.10
 -10  -1   9   47.00    4.30
  10  -1  -9   45.40    6.30
  10   1  -9   43.30    4.20
 -10   1   9   45.70    4.60
  10   1  -9   47.50    3.50
  10   1  -9   53.19    4.20
  -9  -1   9  312.37   15.80
   9  -1  -9  290.57   15.40
   9  -1  -9  256.87   16.50
  -9   1   9  289.47   16.20
   9   1  -9  286.57   14.60
  -9   1   9  296.97   14.10
   9   1  -9  289.47   14.40
   9   1  -9  299.97   14.30
   9   1  -9  296.37   15.50
   8  -1  -9  169.68   11.80
   8  -1  -9  158.08    8.80
  -8  -1   9  181.18   11.10
   8  -1  -9  172.18   10.90
   8   1  -9  174.48   10.90
  -8   1   9  165.78   11.30
  -8   1   9  172.48    9.60
   8   1  -9  163.38   11.50
   8   1  -9  161.78    9.80
   8   1  -9  176.28    9.80
   7  -1  -9  527.95   27.00
  -7  -1   9  474.75   24.40
   7  -1  -9  449.46   22.10
   7  -1  -9  438.56   24.00
   7   1  -9  470.25   22.50
  -7   1   9  522.45   26.10
   7   1  -9  493.25   22.90
   7   1  -9  467.25   22.70
   7   1  -9  507.55   25.60
   6  -1  -9  417.96   21.20
   6  -1  -9  415.76   19.60
   6  -1  -9  435.56   19.40
   6  -1  -9  412.16   22.50
  -6  -1   9  430.86   21.50
   6  -1  -9  386.86   22.10
  -6  -1   9  336.47   32.10
   6   1  -9  404.66   21.00
  -6   1   9  385.06   19.70
   6   1  -9  421.06   20.70
  -6   1   9  417.86   22.10
   6   1  -9  396.76   19.80
   6   1  -9  409.96   19.70
   5  -1  -9  314.57   15.90
   5  -1  -9  305.87   18.40
   5  -1  -9  299.67   16.80
   5  -1  -9  287.27   15.00
  -5  -1   9  299.57   29.10
   5  -1  -9  296.47   15.40
  -5  -1   9  298.97   16.90
   5   1  -9  306.47   15.50
  -5   1   9  301.47   15.70
   5   1  -9  303.97   16.80
   5   1  -9  299.47   15.50
  -5   1   9  308.77   17.70
   5   1  -9  300.37   15.60
  -4  -1   9   28.00    9.60
  -4  -1   9   19.20    3.70
   4  -1  -9   29.90    3.40
   4  -1  -9   25.70    4.10
   4  -1  -9   33.00    5.00
  -4  -1   9   35.80    4.50
   4  -1  -9   30.40    4.10
   4  -1  -9   36.10    5.00
   4   1  -9   28.00    3.80
  -4   1   9   30.50    4.60
  -4   1   9   31.40    3.80
   4   1  -9   28.90    4.20
   4   1  -9   28.70    3.50
   4   1  -9   28.10    3.70
   3  -1  -9   10.20    2.10
  -3  -1   9    6.00    2.00
  -3  -1   9    9.80    2.90
   3  -1  -9    8.60    2.70
  -3  -1   9   12.70    7.30
   3  -1  -9   11.50    3.00
   3  -1  -9    8.20    3.00
  -3  -1   9    6.40    1.90
  -3   1   9    8.10    2.40
   3   1  -9   10.10    2.30
   3   1  -9    7.40    2.30
   3   1  -9    6.70    2.30
  -3   1   9    8.50    2.00
   3   1  -9    6.70    2.20
   2  -1  -9  705.73   32.20
  -2  -1   9  724.13   34.20
   2  -1  -9  719.23   34.10
  -2  -1   9  735.53   50.49
   2  -1  -9  686.23   32.30
  -2  -1   9  742.23   41.10
  -2  -1   9  674.53   34.70
   2  -1  -9  776.62   32.30
  -2  -1   9  817.52   34.40
  -2   1   9  721.63   35.10
   2   1  -9  707.73   32.50
   2   1  -9  732.73   32.80
   2   1  -9  733.63   34.30
  -2   1   9  713.23   32.60
   2   1  -9  705.63   32.50
  -2   1   9  652.33   33.70
  -1  -1   9 1042.10   55.19
   1  -1  -9 1121.79   48.90
   1  -1  -9 1172.68   49.20
   1  -1  -9 1195.78   51.49
   1  -1  -9 1168.88   49.50
  -1  -1   9 1111.29   51.19
  -1  -1   9 1101.99   51.49
  -1  -1   9 1173.18   69.59
   1   1  -9 1180.38   51.59
  -1   1   9 1190.28   52.49
   1   1  -9 1157.68   49.80
   1   1  -9 1192.98   49.99
  -1   1   9 1123.79   49.50
   1   1  -9 1162.28   49.70
   0  -1   9  163.08   11.50
   0  -1  -9  169.58   10.10
   0  -1  -9  187.58   11.70
   0  -1   9  155.18   15.40
   0  -1  -9  163.88    9.60
   0  -1   9  184.08   11.80
   0   1  -9  169.78   10.70
   0   1  -9  180.58   13.50
   0   1   9  183.58   12.40
   0   1   9  178.38   10.30
   0   1  -9  168.38   10.40
   0   1  -9  179.88   11.70
   1  -1   9  572.84   31.40
  -1  -1  -9  526.55   23.80
   1  -1   9  477.95   25.20
  -1  -1  -9  601.34   29.00
   1  -1   9  511.65   28.00
   1   1   9  518.05   24.70
  -1   1  -9  553.74   27.40
  -1   1  -9  544.95   25.40
  -1   1  -9  522.05   25.30
   1   1   9  529.35   27.30
  -1   1  -9  579.34   28.20
   2  -1   9   15.80    2.90
  -2  -1  -9   17.40    3.20
   2  -1   9   25.40    3.60
  -2  -1  -9   15.70    2.30
  -2   1  -9   30.50    5.30
  -2   1  -9   22.90    3.80
  -2   1  -9   25.30    3.10
  -2   1  -9   18.90    3.20
   2   1   9   17.50    3.30
  -3  -1  -9   73.29    5.80
   3  -1   9   69.69    6.00
   3  -1   9   73.19    6.10
   3   1   9   75.29    6.60
  -3   1  -9   50.79    6.90
  -3   1  -9   73.79    5.00
   3   1   9   73.59    4.60
  -3   1  -9   69.89    5.90
  -3   1  -9   66.29    5.70
   4  -1   9  473.35   22.10
  -4  -1  -9  481.85   21.60
   4  -1   9  468.95   21.90
   4   1   9  465.55   22.60
  -4   1  -9  461.55   20.30
   4   1   9  489.55   21.90
  -4   1  -9  498.95   22.30
  -5  -1  -9  683.53   29.40
  -5   1  -9  683.33   29.10
 -10  -2   9  155.38   11.60
  10  -2  -9  175.58    9.10
  10  -2  -9  199.18   12.30
 -10  -2   9  174.28   10.60
  10   2  -9  174.68    8.90
  10   2  -9  179.48    9.80
 -10   2   9  169.68   10.30
  10   2  -9  168.58    9.00
 -10   2   9  188.68    9.10
  -9  -2   9  197.48   10.50
   9  -2  -9  202.98   12.80
  -9  -2   9  224.98   15.50
   9  -2  -9  190.98   10.60
   9   2  -9  192.38   10.90
   9   2  -9  188.68   10.40
  -9   2   9  147.89   11.80
   9   2  -9  191.68   10.10
   9   2  -9  191.58   10.30
  -9   2   9  172.88   11.50
  -8  -2   9  282.57   27.10
  -8  -2   9  316.17   16.00
   8  -2  -9  328.47   17.90
   8  -2  -9  333.87   16.40
   8   2  -9  311.17   16.30
  -8   2   9  311.07   15.70
   8   2  -9  302.17   15.20
  -8   2   9  289.17   17.20
   8   2  -9  300.47   15.50
   7  -2  -9  647.94   30.30
   7  -2  -9  634.74   31.80
  -7  -2   9  605.14   45.40
  -7  -2   9  657.83   30.00
   7   2  -9  669.23   29.20
  -7   2   9  666.23   29.90
   7   2  -9  662.33   29.40
   7   2  -9  630.34   30.20
   7   2  -9  680.43   29.40
  -7   2   9  617.54   31.50
  -6  -2   9  139.19    9.50
  -6  -2   9  122.49   19.80
   6  -2  -9  142.49   10.90
   6  -2  -9  158.88   10.10
   6   2  -9  141.99    9.00
   6   2  -9  142.99    9.80
   6   2  -9  147.19    9.00
  -6   2   9  142.99   10.80
  -6   2   9  139.69    9.30
   6   2  -9  149.69    9.00
   5  -2  -9  229.28   15.00
   5  -2  -9  235.38   13.70
  -5  -2   9  233.98   13.20
  -5  -2   9  223.08   26.00
   5  -2  -9  246.88   11.20
  -5   2   9  221.78   14.40
   5   2  -9  223.48   12.30
  -5   2   9  200.68   12.50
   5   2  -9  217.38   12.40
   5   2  -9  221.28   13.50
   5   2  -9  229.28   13.00
   4  -2  -9  193.98   10.20
  -4  -2   9  177.08   13.50
  -4  -2   9  203.98   12.20
  -4  -2   9  196.78   12.00
   4  -2  -9  193.28   12.30
  -4  -2   9  197.38   24.60
   4  -2  -9  212.68   14.00
  -4   2   9  189.88    9.40
   4   2  -9  207.48   11.30
  -4   2   9  211.48   13.60
  -4   2   9  196.28   11.70
   4   2  -9  207.38   11.40
   4   2  -9  205.78   12.60
   4   2  -9  209.18   11.60
  -3  -2   9  272.17   15.00
  -3  -2   9  260.17   16.40
  -3  -2   9  272.87   29.10
   3  -2  -9  247.48   12.30
  -3  -2   9  249.58   14.40
   3  -2  -9  246.88   14.70
   3   2  -9  253.57   13.70
  -3   2   9  243.28   15.50
  -3   2   9  251.67   11.70
  -3   2   9  255.87   14.20
   3   2  -9  261.57   13.90
   3   2  -9  251.87   14.90
   3   2  -9  243.78   13.60
   2  -2  -9  868.51   35.90
  -2  -2   9  903.51   39.60
   2  -2  -9  851.61   39.10
  -2  -2   9  837.42   57.79
  -2  -2   9  863.51   38.70
  -2  -2   9  840.32   40.60
   2   2  -9  860.01   39.30
   2   2  -9  856.81   38.00
  -2   2   9  851.11   40.50
  -2   2   9  819.12   38.10
   2   2  -9  858.21   37.80
  -2   2   9  851.81   35.30
   2   2  -9  818.02   37.60
  -1  -2   9  261.77   14.70
  -1  -2   9  263.37   16.00
   1  -2  -9  263.77   15.10
  -1  -2   9  274.97   15.70
  -1  -2   9  253.87   21.20
  -1  -2   9  263.87   27.90
   1   2  -9  247.78   18.10
   1   2  -9  271.27   15.50
  -1   2   9  262.37   16.20
   1   2  -9  268.97   14.20
   1   2  -9  258.67   14.30
  -1   2   9  255.67   14.30
  -1   2   9  250.27   11.60
   0  -2   9  522.35   27.30
   0  -2   9  582.54   27.50
   0  -2  -9  574.64   28.50
   0   2  -9  521.85   25.70
   0   2  -9  541.25   25.60
   0   2   9  527.65   32.90
   0   2   9  560.74   27.10
   0   2  -9  518.85   26.10
   1  -2   9   17.60    3.60
   1  -2   9   22.50    3.20
   1  -2   9   22.40    3.60
  -1  -2  -9   19.10    3.30
   1   2   9   17.40    3.60
  -1   2  -9   18.60    3.40
   1   2   9   19.20    3.00
  -1   2  -9   17.50    3.40
  -1   2  -9   20.70    3.60
  -1   2  -9   16.40    3.00
   2  -2   9   78.19    6.10
   2  -2   9   76.89    6.60
  -2  -2  -9   67.69    5.60
   2  -2   9   79.19    6.80
  -2   2  -9   73.69    6.00
  -2   2  -9   66.39    6.00
  -2   2  -9   66.59    6.50
  -2   2  -9   70.59    5.50
   2   2   9   69.19    5.40
   2   2   9   78.39    6.90
   3  -2   9  164.48   11.30
   3  -2   9  209.48   11.80
  -3  -2  -9  195.78   10.30
  -3   2  -9  234.58   14.60
  -3   2  -9  201.88   10.30
  -3   2  -9  183.08   11.20
  -3   2  -9  182.48   10.40
   3   2   9  182.78   11.60
   3   2   9  197.48   10.10
   4  -2   9   60.69    4.70
   4  -2   9   59.59    3.90
   4   2   9   49.50    3.30
   4   2   9   53.79    4.70
  -4   2  -9   60.49    4.80
  -4   2  -9   49.30    4.80
  -4   2  -9   52.39    4.80
  10  -3  -9   82.99    5.90
  10   3  -9   79.19    5.20
  10   3  -9   85.79    5.10
  10   3  -9   90.09    5.00
 -10   3   9   72.69    5.60
 -10   3   9   88.09    4.90
  -9  -3   9   59.29    7.00
  -9  -3   9   64.99   10.20
   9  -3  -9   68.39    5.90
  -9   3   9   71.59    5.10
   9   3  -9   70.99    5.20
   9   3  -9   77.79    4.90
   9   3  -9   73.79    5.30
   9   3  -9   66.29    5.00
  -9   3   9   77.19    6.30
  -8  -3   9  685.83   32.10
  -8  -3   9  698.13   48.20
   8  -3  -9  665.23   31.90
   8  -3  -9  658.33   29.70
   8   3  -9  686.63   29.90
   8   3  -9  682.23   29.80
   8   3  -9  672.33   34.40
   8   3  -9  682.53   29.60
  -8   3   9  673.53   30.30
  -8   3   9  628.64   34.70
   7  -3  -9   81.59    6.20
  -7  -3   9   89.19   15.20
  -7  -3   9   83.29    7.70
   7  -3  -9   85.99    7.60
  -7  -3   9   80.99    5.20
   7   3  -9   98.39    6.20
  -7   3   9   82.49    7.50
   7   3  -9   83.39    6.20
  -7   3   9   80.59    6.50
   7   3  -9   90.99    6.60
   6  -3  -9   28.50    3.70
  -6  -3   9   23.60    8.40
  -6  -3   9   25.70    4.60
  -6  -3   9   29.70    3.10
   6  -3  -9   32.60    4.90
   6   3  -9   20.60    3.10
  -6   3   9   24.90    4.50
   6   3  -9   17.60    3.10
   6   3  -9   24.00    3.20
   6   3  -9   20.20    3.40
  -6   3   9   17.90    3.00
  -6   3   9   28.10    2.50
   5  -3  -9  348.37   33.70
   5  -3  -9  370.66   24.80
  -5  -3   9  327.67   34.30
  -5  -3   9  381.06   17.40
   5  -3  -9  378.66   19.40
   5   3  -9  366.96   18.10
   5   3  -9  368.96   19.10
   5   3  -9  382.46   18.10
  -5   3   9  366.26   20.50
   5   3  -9  361.26   17.80
  -5   3   9  379.96   16.80
  -4  -3   9  455.25   41.00
  -4  -3   9  535.25   27.80
  -4  -3   9  552.84   27.10
   4  -3  -9  463.95   24.80
   4   3  -9  476.45   22.60
  -4   3   9  420.56   28.70
   4   3  -9  488.15   25.60
  -4   3   9  492.35   23.70
  -4   3   9  487.05   21.60
   4   3  -9  486.65   22.90
  -4   3   9  479.15   21.60
  -3  -3   9  500.25   25.30
  -3  -3   9  533.75   44.40
  -3  -3   9  475.75   26.50
   3  -3  -9  493.35   24.60
  -3  -3   9  495.85   23.80
  -3   3   9  507.15   22.30
   3   3  -9  525.95   23.70
   3   3  -9  496.15   23.60
  -3   3   9  513.95   24.50
  -3   3   9  471.35   26.30
  -3   3   9  490.55   22.00
   3   3  -9  519.35   23.80
  -2  -3   9  757.02   36.50
  -2  -3   9  687.33   52.49
   2  -3  -9  767.42   39.20
  -2   3   9  704.43   44.60
   2   3  -9  766.22   33.50
  -2   3   9  706.73   33.20
  -2   3   9  739.83   33.90
   2   3  -9  781.42   33.30
   2   3  -9  727.83   39.10
  -2   3   9  748.43   31.60
  -1  -3   9  169.78    9.30
   1  -3  -9  161.58   10.20
  -1  -3   9  162.08   22.10
   1  -3  -9  191.58   25.60
  -1  -3   9  162.18   11.80
  -1  -3   9  171.68   11.40
  -1   3   9  133.19    8.40
  -1   3   9  156.08   11.60
   1   3  -9  162.98    9.90
   1   3  -9  157.08    9.90
  -1   3   9  160.18    8.20
   1   3  -9  166.48   10.10
   1   3  -9  165.28   10.70
  -1   3   9  172.48   11.60
   0  -3   9   19.90    7.50
   0  -3  -9   24.10    3.20
   0  -3   9   20.50    3.70
   0  -3   9   23.50    2.90
   0  -3   9   27.10    4.00
   0   3   9   21.20    3.20
   0   3  -9   25.40    3.70
   0   3   9   22.50    2.20
   0   3   9   24.60    4.70
   0   3  -9   21.70    3.50
   0   3  -9   18.70    3.50
   1  -3   9   78.89    7.10
   1  -3   9   90.99    5.70
   1  -3   9   75.39    6.80
  -1  -3  -9   79.59    5.90
  -1   3  -9   86.49    6.60
  -1   3  -9   89.99    7.00
   1   3   9   83.59    7.50
  -1   3  -9   92.59    6.70
   1   3   9   85.09    5.40
   1   3   9   90.79    6.40
  -1   3  -9   84.99    6.30
   2  -3   9  141.59    8.40
   2  -3   9  140.69    9.30
   2  -3   9  134.69    7.10
   2   3   9  130.19    8.20
  -2   3  -9  131.49    8.10
  -2   3  -9  147.19    8.50
   2   3   9  125.19    9.30
  -2   3  -9  158.98   11.20
  -2   3  -9  132.69    8.40
   3  -3   9   45.70    4.40
  -3   3  -9   39.80    4.60
  -3   3  -9   48.00    3.80
  -3   3  -9   57.59    5.10
  -3   3  -9   50.59    4.30
   3   3   9   49.00    3.70
   3   3   9   51.39    5.00
   4  -3   9  388.06   17.40
   4   3   9  408.46   16.80
  -4   3  -9  406.36   17.60
  -4   3  -9  360.96   17.20
   9  -4  -9  100.99    8.80
  -9   4   9  134.59    7.30
   9   4  -9  125.29    6.60
   9   4  -9  124.99    6.80
   8  -4  -9  213.38   12.40
  -8  -4   9  227.18   13.10
  -8  -4   9  208.18   21.30
   8   4  -9  211.98   11.00
  -8   4   9  213.68   11.40
   8   4  -9  203.58   10.80
   8   4  -9  212.98   10.70
  -8   4   9  230.08   12.60
   8   4  -9  210.08   10.90
  -7  -4   9  368.36   32.90
   7  -4  -9  421.06   21.00
  -7  -4   9  412.96   23.80
  -7   4   9  414.56   17.20
   7   4  -9  394.76   21.40
  -7   4   9  396.66   20.80
   7   4  -9  399.56   18.70
   7   4  -9  401.36   18.80
  -7   4   9  413.76   19.60
  -6  -4   9   97.39   16.20
  -6  -4   9  108.99    8.60
   6  -4  -9  107.79    8.50
  -6   4   9  104.99    9.20
  -6   4   9  106.39    7.50
  -6   4   9   99.49    5.70
   6   4  -9  107.79    6.90
   6   4  -9   97.49    6.50
  -6   4   9   99.69    6.90
   6   4  -9   85.29    7.10
   6   4  -9  104.99    6.80
  -5  -4   9  270.67   16.30
  -5  -4   9  231.48   27.10
  -5   4   9  267.77   16.00
  -5   4   9  261.27   14.40
  -5   4   9  265.77   12.90
   5   4  -9  277.57   13.50
   5   4  -9  265.77   13.50
  -5   4   9  273.17   12.60
   5   4  -9  274.27   13.70
  -4  -4   9  133.19   10.10
  -4  -4   9  113.69   18.20
  -4  -4   9   98.59    7.60
  -4   4   9  110.79    6.90
  -4   4   9  108.29   11.00
  -4   4   9  118.29    6.60
   4   4  -9  119.99   10.10
  -4   4   9  112.99    9.50
  -4   4   9  116.99    8.10
   4   4  -9  115.09    7.50
   4   4  -9  104.79    9.60
  -3  -4   9  173.28   23.50
  -3  -4   9  163.98   12.10
  -3  -4   9  167.38   10.70
  -3   4   9  176.68   12.20
  -3   4   9  167.48   10.50
  -3   4   9  157.48   10.20
   3   4  -9  170.28   10.50
   3   4  -9  172.88    9.90
  -3   4   9  168.48   10.80
  -3   4   9  163.68    8.70
   3   4  -9  170.88   10.90
  -2  -4   9  675.23   31.30
  -2  -4   9  618.34   32.30
  -2  -4   9  636.44   48.80
  -2   4   9  668.93   30.50
   2   4  -9  667.83   29.70
  -2   4   9  668.63   28.30
   2   4  -9  645.84   33.10
  -2   4   9  655.93   32.30
   2   4  -9  694.73   31.60
  -2   4   9  660.63   28.50
  -1  -4   9  105.59    8.80
  -1  -4   9  103.49   17.00
  -1  -4   9  131.99    9.00
   1   4  -9  106.19    7.40
  -1   4   9  105.89    6.10
  -1   4   9  105.59    7.60
   1   4  -9  116.39    7.40
   1   4  -9  111.39    7.40
  -1   4   9  106.99    8.30
  -1   4   9  127.29   10.40
  -1   4   9  106.79    6.50
   0  -4   9   43.40    4.90
   0  -4   9   45.80   10.50
   0  -4   9   42.20    5.00
   0   4   9   46.80    3.30
   0   4  -9   54.39    5.20
   0   4   9   43.00    4.30
   0   4   9   45.30    3.80
   0   4  -9   45.80    4.60
   0   4  -9   51.09    4.40
   0   4   9   46.50    5.90
   0   4  -9   40.40    5.30
   1  -4   9   84.19    6.80
   1  -4   9   97.59    8.70
   1   4   9   76.99    4.30
   1   4   9   82.09    5.90
  -1   4  -9   83.09    9.20
  -1   4  -9   84.39    6.80
   1   4   9   90.99    7.50
  -1   4  -9   81.89    6.40
  -1   4  -9   84.09    6.00
   2  -4   9  162.78    9.20
   2  -4   9  173.58   10.20
  -2   4  -9  185.68    9.40
   2   4   9  186.88    9.60
  -2   4  -9  171.18   10.30
  -2   4  -9  172.18    9.90
   2   4   9  171.48   12.80
   3  -4   9  280.87   13.50
   3   4   9  234.48   11.70
  -3   4  -9  268.07   11.80
  -3   4  -9  246.48   12.00
  -3   4  -9  232.18   12.50
  -8   5   9  603.64   25.20
   8   5  -9  566.74   24.80
   8   5  -9  578.34   24.60
  -7  -5   9   93.79    6.30
  -7   5   9  106.89    6.50
   7   5  -9  111.79    7.10
  -7   5   9   97.09    5.70
   7   5  -9   99.79    6.00
  -6  -5   9  166.28   10.00
  -6  -5   9  131.99   18.40
  -6   5   9  169.68    7.80
   6   5  -9  163.68    8.50
   6   5  -9  160.78    8.60
   6   5  -9  146.99    9.80
  -6   5   9  176.88    9.40
  -6   5   9  152.68    8.20
  -5  -5   9   50.09   11.20
   5   5  -9   58.49    4.70
  -5   5   9   62.59    4.90
  -5   5   9   60.99    4.90
   5   5  -9   54.29    4.50
  -5   5   9   55.19    5.30
  -4  -5   9  196.68   12.50
  -4  -5   9  173.18   11.70
  -4   5   9  179.68   10.50
   4   5  -9  191.28    9.90
  -4   5   9  184.58    9.10
   4   5  -9  180.78    9.70
   4   5  -9  177.38    9.80
  -4   5   9  181.78   11.20
  -4   5   9  170.08    9.20
  -3  -5   9  294.37   17.30
  -3  -5   9  314.77   16.00
   3   5  -9  312.47   15.20
   3   5  -9  320.47   15.20
   3   5  -9  308.97   15.30
  -3   5   9  306.57   14.30
  -3   5   9  314.77   15.90
  -3   5   9  303.67   15.10
  -3   5   9  356.96   17.30
  -2  -5   9   27.80    8.50
  -2  -5   9   28.60    4.20
  -2  -5   9   22.20    5.20
  -2   5   9   32.80    3.20
  -2   5   9   25.40    3.90
  -2   5   9   30.80    3.50
   2   5  -9   33.50    3.70
  -2   5   9   35.30    2.80
   2   5  -9   27.70    3.50
   2   5  -9   28.90    3.60
  -1  -5   9    0.50    2.10
  -1  -5   9   -1.20    1.50
   1   5  -9    3.80    1.60
  -1   5   9    0.60    0.90
   1   5  -9    2.70    1.60
   1   5  -9   -0.20    1.50
  -1   5   9    1.70    1.00
  -1   5   9    1.80    1.60
   0  -5   9    8.80    2.50
   0  -5   9    8.10    1.90
   0   5  -9    6.20    1.80
   0   5  -9    5.00    3.00
   0   5  -9    9.00    1.90
   0   5   9    7.40    1.20
   0   5   9    6.20    1.90
   0   5   9    5.80    1.50
   1  -5   9   25.80    3.50
   1  -5   9   20.70    2.70
  -1   5  -9   19.70    2.70
   1   5   9   19.20    1.80
   1   5   9   15.90    2.10
  -1   5  -9   27.10    3.70
   2  -5   9  612.14   29.20
   2  -5   9  746.13   30.00
  -2   5  -9  668.93   29.40
   2   5   9  733.83   29.40
  -2   5  -9  676.33   28.70
  -6   6   9   99.29    4.80
  -6   6   9   89.39    5.30
  -5  -6   9   44.40    3.80
  -5   6   9   49.80    3.30
  -5   6   9   52.69    3.80
  -4  -6   9   48.20    9.60
  -4  -6   9   49.30    4.40
  -4   6   9   63.09    5.80
  -4   6   9   53.49    3.60
  -4   6   9   54.19    4.30
  -3  -6   9  282.87   12.00
  -3   6   9  215.98   14.90
  -3   6   9  268.37   12.00
  -2  -6   9   76.29   13.20
  -2  -6   9   95.99    7.00
  -2   6   9  104.79    4.90
  -2   6   9   94.99    6.20
  -2   6   9   99.89    6.00
  -1  -6   9  450.95   21.30
  -1   6   9  472.05   20.60
  -1   6   9  459.45   20.30
   0  -6   9  203.68   10.10
  10   0 -10  116.39    7.10
 -10   0  10  115.69    7.30
   9   0 -10   18.70    2.90
   9   0 -10   21.60    2.20
  -9   0  10   17.80    3.10
   8   0 -10  161.58    8.30
   8   0 -10  145.19    9.80
   8   0 -10  155.28    9.70
   8   0 -10  130.89   10.60
   8   0 -10  131.19   12.80
  -8   0  10  142.59    9.90
   7   0 -10  161.58   12.10
   7   0 -10  184.48   11.80
   7   0 -10  170.58   10.90
   7   0 -10  167.88    9.50
  -7   0  10  174.68   11.40
   7   0 -10  172.78   11.10
   6   0 -10   45.50    4.20
  -6   0  10   40.80    5.10
   6   0 -10   40.60    4.90
   6   0 -10   41.80    5.10
   6   0 -10   41.50    4.50
   5   0 -10  454.65   23.60
   5   0 -10  489.45   27.40
   5   0 -10  437.36   22.00
   5   0 -10  462.45   22.00
   4   0 -10    7.60    2.50
  -4   0  10   10.50    3.80
   4   0 -10    5.30    2.00
   4   0 -10    7.40    2.00
   3   0 -10   32.10    3.70
  -3   0  10   23.50    4.00
   3   0 -10   24.80    4.00
   3   0 -10   26.50    4.10
   3   0 -10   24.40    3.80
   2   0 -10    2.60    1.70
   2   0 -10    3.40    2.40
   2   0 -10    3.70    2.30
  -2   0  10    3.00    2.00
  -2   0  10    2.60    1.70
   2   0 -10    6.10    2.30
  -1   0  10   78.89    6.90
   1   0 -10   95.59    6.50
  -1   0  10  102.39    8.10
   1   0 -10   94.69    7.70
   1   0 -10   93.59    6.90
   1   0 -10   84.49    7.30
   0   0 -10  231.18   12.60
   0   0  10  234.48   14.10
   0   0 -10  254.07   17.20
   0   0 -10  241.78   14.00
   0   0 -10  231.18   12.10
  -1   0 -10   27.40    3.60
   1   0  10   27.50    3.90
  -1   0 -10   29.30    2.90
  -1   0 -10   25.70    3.90
   2   0  10   28.10    3.40
  -2   0 -10   32.80    3.30
   2   0  10   33.90    3.90
  -2   0 -10   33.50    3.80
  -3   0 -10   30.80    3.10
   3   0  10   35.00    3.60
   3   0  10   35.30    3.40
 -10  -1  10  190.68   10.80
  10  -1 -10  185.18   10.90
 -10  -1  10  206.88   10.60
  10  -1 -10  187.08   10.40
 -10   1  10  202.48   11.30
  10   1 -10  200.48    9.50
  10   1 -10  205.98   10.90
   9  -1 -10   81.39    7.00
   9  -1 -10   54.79    7.40
  -9  -1  10   67.79    6.10
   9   1 -10   82.79    7.00
  -9   1  10   71.69    6.80
   9   1 -10   78.19    6.10
   9   1 -10   85.09    6.70
   8  -1 -10  442.26   25.10
   8  -1 -10  436.46   19.60
  -8  -1  10  461.55   22.60
   8  -1 -10  487.25   22.70
   8   1 -10  468.55   21.30
   8   1 -10  484.25   22.90
   8   1 -10  461.25   21.50
  -8   1  10  472.35   23.50
   8   1 -10  481.05   21.90
   7  -1 -10  223.88   11.10
  -7  -1  10  222.48   13.20
   7  -1 -10  210.08   14.00
   7  -1 -10  233.18   13.30
   7   1 -10  237.68   13.50
  -7   1  10  224.28   11.50
   7   1 -10  240.18   12.60
  -7   1  10  228.38   14.00
  -6  -1  10   65.09    6.20
   6  -1 -10   63.89    5.00
   6  -1 -10   70.29    6.70
   6  -1 -10   71.19    7.30
   6  -1 -10   75.29    6.60
  -6   1  10   68.09    6.90
  -6   1  10   75.49    5.60
   6   1 -10   82.99    6.30
   6   1 -10   71.09    6.50
   6   1 -10   76.09    5.70
   6   1 -10   77.69    6.10
   5  -1 -10  476.65   25.10
   5  -1 -10  400.26   20.30
   5  -1 -10  437.06   20.40
  -5  -1  10  423.56   23.60
  -5   1  10  455.35   23.50
   5   1 -10  433.06   23.00
   5   1 -10  455.15   21.40
   5   1 -10  427.36   21.10
  -5   1  10  443.96   20.70
   5   1 -10  440.56   23.50
   4  -1 -10  607.64   26.30
   4  -1 -10  575.24   29.50
  -4  -1  10  577.04   29.30
  -4  -1  10  516.15   26.60
  -4  -1  10  587.54   34.30
  -4  -1  10  498.65   38.30
  -4   1  10  653.53   30.30
   4   1 -10  537.95   27.00
   4   1 -10  580.14   26.90
  -4   1  10  659.93   31.10
   4   1 -10  575.74   26.90
  -3  -1  10  190.38   12.40
  -3  -1  10  178.38   12.20
  -3  -1  10  148.79   18.60
   3  -1 -10  176.28   12.20
   3  -1 -10  175.38   10.00
   3   1 -10  177.28   10.50
  -3   1  10  154.28   12.70
   3   1 -10  177.28   10.50
  -3   1  10  146.99   11.40
   3   1 -10  167.48   10.80
   3   1 -10  177.68   14.80
   2  -1 -10   11.90    3.00
   2  -1 -10   19.00    4.40
  -2  -1  10   15.00    4.10
   2  -1 -10   14.40    2.50
  -2  -1  10    9.60    2.50
  -2  -1  10   16.20    4.30
   2   1 -10   16.40    3.60
   2   1 -10   14.60    3.80
   2   1 -10   11.90    2.80
  -2   1  10    9.30    2.00
  -2   1  10   21.50    4.10
   2   1 -10   12.60    2.80
  -2   1  10   17.90    3.50
  -1  -1  10  260.67   15.50
   1  -1 -10  282.67   15.70
  -1  -1  10  280.07   15.60
   1  -1 -10  269.27   13.30
  -1  -1  10  290.67   15.70
   1   1 -10  275.57   14.70
   1   1 -10  285.37   15.80
   1   1 -10  276.97   14.70
  -1   1  10  259.27   13.70
  -1   1  10  269.17   16.10
   0  -1 -10   23.60    3.60
   0  -1 -10   23.70    2.60
   0  -1  10   32.20    4.00
   0  -1  10   24.90    3.60
   0  -1  10   22.80    3.70
   0   1 -10   23.10    4.00
   0   1 -10   22.80    3.20
   0   1  10   22.90    3.80
   0   1 -10   21.70    4.30
   0   1  10   24.20    3.00
   0   1 -10   23.90    3.50
   1  -1  10   85.39    6.80
   1  -1  10   87.59    6.70
  -1  -1 -10   77.29    6.20
   1   1  10   73.59    5.10
   1   1  10   76.59    6.60
  -1   1 -10   75.39    5.40
  -1   1 -10   76.59    6.40
  -1   1 -10   77.59    5.80
  -1   1 -10   82.39    6.60
  -2  -1 -10   98.99    6.80
   2  -1  10   85.69    7.40
  -2   1 -10   96.39    6.30
   2   1  10  116.89    8.00
  -2   1 -10   98.49    8.30
  -2   1 -10  105.69    6.00
   3  -1  10   97.69    7.80
  -3  -1 -10   83.69    5.20
   3  -1  10   98.59    7.00
  -3   1 -10   69.39    4.80
   3   1  10   80.39    7.40
  -3   1 -10   88.69    5.90
 -10  -2  10  213.38   10.70
  10  -2 -10  210.98   11.30
  10   2 -10  200.18   10.10
  10   2 -10  217.08   12.70
 -10   2  10  224.08   11.60
   9  -2 -10  145.19    8.50
  -9  -2  10  153.18    9.40
  -9  -2  10  151.68    9.60
   9  -2 -10  148.09    9.70
  -9   2  10  156.88    8.00
   9   2 -10  155.78    8.10
   9   2 -10  157.28    8.80
  -9   2  10  141.99    9.40
   9   2 -10  146.39    8.80
   8  -2 -10   20.20    3.10
  -8  -2  10   25.60    3.90
  -8  -2  10   22.80    4.50
   8  -2 -10   14.90    3.70
   8   2 -10   21.90    3.20
   8   2 -10   22.50    3.60
  -8   2  10   25.10    3.60
   8   2 -10   29.60    3.90
   8   2 -10   25.20    3.00
  -8   2  10   25.00    2.90
  -7  -2  10   45.50    5.50
  -7  -2  10   48.10    4.50
   7  -2 -10   47.70    5.50
   7  -2 -10   49.60    4.80
   7   2 -10   40.60    4.50
   7   2 -10   57.39    4.50
   7   2 -10   42.20    4.50
  -7   2  10   39.90    5.00
  -7   2  10   46.70    4.20
   7   2 -10   45.90    4.40
  -6  -2  10  635.14   31.00
   6  -2 -10  616.84   30.50
  -6  -2  10  625.54   28.20
  -6  -2  10  564.74   42.10
   6  -2 -10  624.94   28.80
   6   2 -10  633.34   28.90
  -6   2  10  605.84   29.90
  -6   2  10  595.14   27.70
   6   2 -10  643.94   28.00
   6   2 -10  552.44   27.20
  -5  -2  10   34.00    5.20
  -5  -2  10   30.30    8.80
   5  -2 -10   32.10    4.10
  -5  -2  10   35.90    4.10
   5   2 -10   31.10    4.00
  -5   2  10   31.50    3.90
  -5   2  10   32.40    4.70
   5   2 -10   35.10    4.10
   5   2 -10   36.90    3.70
   5   2 -10   31.70    4.30
   4  -2 -10  331.47   18.00
  -4  -2  10  311.77   30.10
  -4  -2  10  341.67   19.70
  -4  -2  10  350.76   17.60
  -4  -2  10  327.77   17.20
  -4   2  10  340.37   19.20
   4   2 -10  354.46   17.30
   4   2 -10  344.07   18.30
  -4   2  10  333.97   17.10
   4   2 -10  340.57   17.00
   4   2 -10  349.37   17.40
  -3  -2  10    9.30    5.40
  -3  -2  10   12.60    2.70
  -3  -2  10    8.80    2.60
  -3  -2  10    9.80    3.30
   3  -2 -10    9.20    2.20
   3   2 -10   10.40    2.60
   3   2 -10    7.60    2.50
   3   2 -10   14.40    2.80
   3   2 -10    9.90    2.40
  -3   2  10    5.90    2.40
  -3   2  10    7.60    2.30
  -3   2  10    8.90    2.20
  -2  -2  10  357.96   32.40
  -2  -2  10  402.56   21.70
   2  -2 -10  431.36   20.90
  -2  -2  10  403.36   20.10
  -2  -2  10  406.96   20.90
   2   2 -10  426.16   20.00
   2   2 -10  395.86   20.90
   2   2 -10  416.66   20.10
  -2   2  10  419.66   22.10
   2   2 -10  407.56   20.00
  -2   2  10  400.66   19.70
  -1  -2  10  118.29    8.90
  -1  -2  10  120.39    8.70
   1  -2 -10  121.49    8.40
  -1  -2  10  127.99    8.30
  -1   2  10  112.79    7.60
  -1   2  10  116.69    9.10
   1   2 -10  122.19    8.20
   1   2 -10  107.39    8.80
   1   2 -10  121.99    7.90
   1   2 -10  115.59    8.60
   0  -2  10   72.79    6.50
   0  -2  10   72.99    5.90
   0  -2 -10   73.49    6.00
   0  -2  10   73.69    6.20
   0   2 -10   78.29    5.80
   0   2 -10   80.09    6.10
   0   2  10   72.79    6.70
   0   2 -10   73.89    6.40
   0   2  10   86.89    5.80
   0   2 -10   74.49    6.60
   1  -2  10  365.36   17.90
   1  -2  10  374.56   18.90
   1  -2  10  334.67   19.30
  -1  -2 -10  356.16   20.90
   1   2  10  381.16   19.50
  -1   2 -10  380.66   17.70
  -1   2 -10  379.16   17.50
  -1   2 -10  345.27   17.60
  -1   2 -10  382.16   18.60
  -2  -2 -10  155.28    8.90
   2  -2  10  145.49    9.00
   2  -2  10  150.48    7.90
  -2   2 -10  149.39    8.20
   2   2  10  141.09    9.10
  -2   2 -10  144.59    8.70
  -2   2 -10  143.59    7.80
   2   2  10  137.99    7.40
   3  -2  10  101.19    6.30
  -3   2 -10   98.59    5.30
   3   2  10   96.19    6.40
   3   2  10  102.19    6.00
  -3   2 -10  112.39    6.70
  -9  -3  10   95.79    6.30
   9  -3 -10   94.79    6.80
  -9   3  10  102.39    5.80
  -9   3  10  106.19    6.90
   9   3 -10  121.09    8.20
   9   3 -10  101.99    6.20
   9   3 -10  100.39    6.00
   8  -3 -10  103.19    7.80
  -8  -3  10  115.09    7.90
   8  -3 -10  103.39    6.80
   8   3 -10  115.99    6.70
  -8   3  10  116.69    8.00
  -8   3  10  115.19    6.80
   8   3 -10  114.99    6.90
   8   3 -10  113.39    7.10
   7  -3 -10   89.99    7.40
   7  -3 -10   84.39    5.60
  -7  -3  10   89.59    7.50
   7   3 -10   83.59    6.30
   7   3 -10   85.29    6.10
   7   3 -10   88.19    6.10
  -7   3  10   82.09    6.00
   7   3 -10   91.49    5.90
  -7   3  10   81.79    7.20
  -6  -3  10   84.19    7.70
   6  -3 -10   86.49    6.10
  -6   3  10   80.89    6.10
   6   3 -10   87.09    5.90
   6   3 -10   84.79    7.20
   6   3 -10   83.09    7.10
   6   3 -10   79.39    6.00
  -6   3  10   88.89    7.40
   5  -3 -10    8.30    2.20
  -5  -3  10   14.70    3.80
  -5  -3  10    8.30    5.40
   5   3 -10    9.30    2.20
   5   3 -10   10.10    2.30
  -5   3  10   13.20    2.40
  -5   3  10    9.00    2.30
   5   3 -10   13.40    2.50
  -4  -3  10    8.70    5.60
   4  -3 -10    8.00    2.20
  -4  -3  10   14.50    3.20
  -4  -3  10   17.10    3.30
  -4  -3  10   13.00    3.90
   4   3 -10   15.30    2.70
  -4   3  10   10.80    3.30
   4   3 -10   13.50    3.30
   4   3 -10   19.20    3.10
   4   3 -10   12.50    2.70
  -4   3  10   20.20    3.10
  -3  -3  10   16.30    7.10
  -3  -3  10   22.00    3.70
  -3  -3  10   21.30    3.80
   3  -3 -10   24.50    3.30
  -3  -3  10   23.90    2.50
  -3   3  10   17.20    2.80
  -3   3  10   26.70    4.60
   3   3 -10   20.80    3.30
   3   3 -10   22.50    3.10
   3   3 -10   19.80    3.50
   3   3 -10   24.30    4.20
  -2  -3  10  302.07   16.40
  -2  -3  10  299.37   17.30
   2  -3 -10  293.77   15.20
  -2  -3  10  287.87   27.90
   2   3 -10  315.67   15.60
  -2   3  10  296.77   15.50
   2   3 -10  313.07   15.60
  -2   3  10  292.17   17.10
   2   3 -10  300.47   15.30
   2   3 -10  319.17   16.30
  -1  -3  10  266.37   15.00
   1  -3 -10  247.38   14.10
  -1  -3  10  255.17   14.50
   1   3 -10  266.07   13.60
  -1   3  10  263.07   15.10
   1   3 -10  253.97   13.70
  -1   3  10  250.37   13.50
   1   3 -10  276.97   15.70
   1   3 -10  261.47   14.20
   0  -3  10   57.79    5.60
   0  -3  10   56.29    5.40
   0  -3 -10   54.99    4.50
   0   3 -10   61.49    5.20
   0   3  10   54.19    5.40
   0   3  10   55.49    4.60
   0   3 -10   62.39    5.10
   0   3 -10   58.79    5.10
   0   3 -10   60.59    4.70
   1  -3  10   59.69    5.00
   1  -3  10   51.39    5.10
  -1   3 -10   53.89    4.40
   1   3  10   55.19    4.20
  -1   3 -10   55.59    4.20
  -1   3 -10   55.49    4.60
  -1   3 -10   58.79    5.80
   2  -3  10   11.80    3.20
   2   3  10    3.50    1.80
  -2   3 -10    2.20    1.20
  -2   3 -10    4.00    1.50
  -2   3 -10    3.70    1.60
   2   3  10    5.50    1.40
  -8  -4  10  123.39    7.00
  -8  -4  10   96.89   11.50
   8   4 -10  123.39    6.70
   8   4 -10  126.49    6.50
  -8   4  10  118.69    6.50
  -8   4  10  119.89    8.80
  -7  -4  10  293.47   15.00
   7   4 -10  274.57   13.30
  -7   4  10  277.57   13.80
   7   4 -10  286.37   13.70
   7   4 -10  283.27   13.80
  -7   4  10  280.77   14.90
  -6  -4  10   63.19   11.80
  -6  -4  10   72.49    6.50
   6   4 -10   78.89    5.30
   6   4 -10   78.99    5.50
   6   4 -10   83.99    5.60
  -6   4  10   88.39    6.90
  -6   4  10   84.09    6.90
  -5  -4  10   45.20    5.20
  -5  -4  10   44.60   12.40
  -5   4  10   46.00    5.80
  -5   4  10   47.10    4.50
   5   4 -10   50.49    4.10
   5   4 -10   51.69    4.40
  -4  -4  10  177.88   11.10
  -4  -4  10  169.48   20.40
  -4  -4  10  186.28   12.00
  -4   4  10  199.78   11.90
   4   4 -10  190.28   10.20
  -4   4  10  176.98   10.40
   4   4 -10  182.98   10.00
  -4   4  10  173.78    8.10
   4   4 -10  175.68    9.80
  -3  -4  10  160.58   10.90
  -3  -4  10  158.68    9.20
  -3  -4  10  149.59   18.60
   3   4 -10  155.78    9.60
  -3   4  10  175.68   11.00
   3   4 -10  162.48    9.30
   3   4 -10  161.48    9.10
   3   4 -10  166.18    9.30
  -3   4  10  161.58    9.50
  -3   4  10  153.88    7.30
  -2  -4  10    5.90    2.00
  -2  -4  10    8.30    2.30
   2   4 -10    6.70    2.00
   2   4 -10    7.40    3.10
  -2   4  10    8.20    1.90
   2   4 -10    9.50    2.10
   2   4 -10    7.00    2.80
  -1  -4  10   20.80    3.30
  -1  -4  10   22.30    3.30
   1   4 -10   19.60    3.00
   1   4 -10   14.40    2.50
   1   4 -10   20.00    2.90
   1   4 -10   16.50    3.00
  -1   4  10   14.90    3.40
   0  -4  10   72.89    5.60
   0  -4  10   72.39    5.40
   0   4 -10   68.79    4.80
   0   4  10   67.79    5.80
   0   4 -10   71.49    5.10
   0   4 -10   72.79    5.70
   0   4 -10   65.89    5.40
   0   4  10   74.09    5.00
   1  -4  10   10.60    2.10
   1  -4  10   12.30    1.90
   1   4  10    9.20    1.60
  -1   4 -10    9.30    1.90
  -1   4 -10   11.10    1.70
  -7  -5  10   88.39   10.40
  -7   5  10  101.59    5.50
  -6  -5  10   34.10    7.20
  -6  -5  10   41.80    4.30
  -6   5  10   42.80    3.40
   6   5 -10   39.70    3.00
   6   5 -10   35.70    4.00
  -5  -5  10  354.96   19.80
   5   5 -10  380.66   16.70
   5   5 -10  362.86   16.80
  -5   5  10  388.66   17.40
  -4  -5  10   29.10    7.20
  -4  -5  10   36.90    3.80
   4   5 -10   33.50    3.40
  -4   5  10   36.50    3.30
  -4   5  10   27.70    2.00
   4   5 -10   29.90    2.90
  -3  -5  10   73.19    4.60
  -3  -5  10   69.89    5.80
   3   5 -10   78.29    4.80
  -3   5  10   65.29    3.50
   3   5 -10   74.59    5.10
  -3   5  10   73.59    5.00
  -2  -5  10  211.68   12.10
  -2  -5  10  226.58   12.20
   2   5 -10  212.38   10.80
   2   5 -10  211.88   10.50
  -2   5  10  227.98   11.10
  -1  -5  10   60.09    5.00
  -1  -5  10   52.49    4.40
   1   5 -10   51.29    4.50
   1   5 -10   56.29    3.80
  -1   5  10   58.29    4.00
   0  -5  10   80.59    5.10
   0  -5  10   82.09    5.10
   0   5 -10   88.89    4.70
   0   5  10   81.49    4.90
   9   0 -11   10.50    2.00
  -9   0  11    8.60    1.80
   8   0 -11  220.48   10.00
   8   0 -11  214.58   11.90
  -8   0  11  205.68   11.90
   7   0 -11  335.47   17.00
   7   0 -11  346.67   17.60
  -7   0  11  320.77   17.10
   7   0 -11  306.87   15.10
  -6   0  11  362.86   19.90
   6   0 -11  418.56   20.20
   6   0 -11  400.06   19.50
   6   0 -11  392.06   18.20
   6   0 -11  392.16   19.30
  -5   0  11  427.16   21.40
   5   0 -11  384.96   19.90
   5   0 -11  419.26   19.60
   5   0 -11  415.86   19.30
   5   0 -11  426.96   21.20
   4   0 -11  326.67   16.90
  -4   0  11  335.57   18.10
  -4   0  11  332.37   18.10
   4   0 -11  318.87   16.10
   4   0 -11  365.16   18.30
   4   0 -11  333.17   16.40
   3   0 -11  585.54   27.60
  -3   0  11  578.14   27.70
  -3   0  11  585.84   26.40
   3   0 -11  539.75   26.10
   3   0 -11  611.74   26.00
  -3   0  11  544.15   27.00
   3   0 -11  551.54   25.50
  -2   0  11  641.04   30.30
  -2   0  11  674.13   29.80
  -2   0  11  629.34   29.50
   2   0 -11  648.04   28.60
   2   0 -11  674.63   30.30
   2   0 -11  598.14   29.00
   2   0 -11  639.64   28.20
  -1   0  11    3.60    1.50
  -1   0  11    5.50    1.90
   1   0 -11    5.40    1.40
   1   0 -11    5.10    1.90
   1   0 -11   10.30    3.70
   0   0 -11   18.20    3.40
   0   0  11   23.80    3.70
   0   0 -11   22.30    2.10
   0   0  11   25.10    3.90
   1   0  11   28.50    3.20
   1   0  11   32.10    3.40
  -1   0 -11   26.90    3.10
   2   0  11   10.50    2.90
   2   0  11   10.40    2.40
   9  -1 -11  396.06   18.20
  -9  -1  11  386.86   17.30
   9   1 -11  344.67   20.00
   9   1 -11  382.56   16.80
  -9   1  11  406.96   20.60
  -8  -1  11  385.56   20.70
   8  -1 -11  411.96   19.70
  -8  -1  11  406.76   19.40
   8   1 -11  435.26   20.10
   8   1 -11  425.16   18.60
   8   1 -11  387.16   18.60
  -8   1  11  446.76   20.60
   7  -1 -11  153.08    9.40
  -7  -1  11  160.58   10.70
  -7  -1  11  151.18    9.20
   7   1 -11  145.29    9.30
   7   1 -11  152.38    8.40
   7   1 -11  145.59    9.30
   7   1 -11  141.69    9.40
  -7   1  11  142.69    9.70
   6  -1 -11   93.59    5.30
  -6  -1  11   87.89    7.80
  -6  -1  11   89.69    6.90
   6  -1 -11   98.89    7.30
   6   1 -11   92.09    6.20
   6   1 -11   98.29    7.00
  -6   1  11   98.99    7.80
   6   1 -11   97.59    7.30
   6   1 -11   89.49    6.50
   5  -1 -11  469.25   22.70
   5  -1 -11  474.85   20.00
  -5  -1  11  442.36   23.50
  -5  -1  11  454.75   22.40
  -5   1  11  455.75   23.30
   5   1 -11  467.65   22.80
   5   1 -11  421.76   21.70
   5   1 -11  462.45   21.50
   5   1 -11  459.25   21.30
   4  -1 -11  278.77   14.80
   4  -1 -11  267.07   12.30
  -4  -1  11  280.77   14.70
  -4  -1  11  268.47   15.40
   4   1 -11  263.27   13.50
  -4   1  11  224.28   13.90
  -4   1  11  249.78   14.40
   4   1 -11  267.07   14.80
  -4   1  11  251.17   15.10
   4   1 -11  264.07   13.70
   3  -1 -11  109.29    8.10
  -3  -1  11  112.79    8.00
  -3  -1  11  114.59    7.80
   3  -1 -11  116.49    6.30
[truncated: 11,312 more chars]
