# Supplementary material for: Immunosuppressive Sesquiterpenoids from the Edible Mushroom Craterellus odoratus
Source: J Fungi (Basel). 2021 Dec 8;7(12):1052. doi: 10.3390/jof7121052 (PMC8707212; doi:10.3390/jof7121052)
Supplement: Supplementary file 1 [file jof-07-01052-s001.zip › compound 4_0m.cif]

data_global
_audit_creation_method                  'APEX3 v2017.3-0'

_publ_requested_journal                 ?

_publ_contact_author_name               ?
_publ_contact_author_address            
;
;
_publ_contact_author_email              ?
_publ_contact_author_fax                ?
_publ_contact_author_phone              ?

_publ_section_title                     
;
;
_publ_section_abstract                  
;
;
_publ_section_references                
;
;
_publ_section_comment                   
;
;

data_LDLB45
_chemical_name_systematic               ?
_chemical_name_common                   ?
_chemical_formula_moiety                ?
_chemical_formula_sum                   'C15 H24 O4'
_chemical_formula_iupac                 ?
_chemical_formula_weight                268.34
_chemical_absolute_configuration        ad

_chemical_melting_point                 ?

_space_group_crystal_system             monoclinic
_space_group_name_H-M_alt               'P 1 21 1'
_space_group_name_Hall                  'P 2yb'
loop_
    _space_group_symop_operation_xyz
    'x, y, z'
    '-x, y+1/2, -z'

_cell_length_a                          6.4802(4)
_cell_length_b                          10.8539(7)
_cell_length_c                          10.8186(7)
_cell_angle_alpha                       90
_cell_angle_beta                        101.555(2)
_cell_angle_gamma                       90
_cell_volume                            745.51(8)
_cell_formula_units_Z                   2
_cell_measurement_reflns_used           9937
_cell_measurement_theta_min             5.8348
_cell_measurement_theta_max             78.9043
_cell_measurement_temperature           297.(2)

_exptl_crystal_description              Block
_exptl_crystal_colour                    'light colourless'
_exptl_crystal_size_max                 0.282
_exptl_crystal_size_mid                 0.132
_exptl_crystal_size_min                 0.110
_exptl_crystal_density_diffrn           1.195
_exptl_crystal_density_meas             ?
_exptl_crystal_density_method           'not measured'
_exptl_crystal_F_000                    292

_exptl_absorpt_coefficient_mu           0.692
_exptl_absorpt_correction_type          Multi-Scan
_exptl_absorpt_process_details          
;
SADABS-2016/2 - Bruker AXS area detector scaling and absorption correction
;
_exptl_absorpt_correction_T_min         0.85
_exptl_absorpt_correction_T_max         0.93

_exptl_special_details                  
;
; 

_diffrn_ambient_temperature             297.(2)

_diffrn_source                          ?
_diffrn_source_type                     ?

_diffrn_radiation_type                   'Cu K\a'
_diffrn_radiation_wavelength            1.54178
_diffrn_radiation_monochromator         ?

_diffrn_measurement_device_type         'Bruker APEX-II CCD'
_diffrn_measurement_method              '\f and \w scans' 

_diffrn_detector_area_resol_mean        7.3910

_diffrn_reflns_number                   15119
_diffrn_reflns_av_R_equivalents         0.0263
_diffrn_reflns_av_unetI/netI            0.0213
_diffrn_reflns_theta_min                5.83
_diffrn_reflns_theta_max                79.09
_diffrn_reflns_theta_full               79.09
_diffrn_measured_fraction_theta_max     0.980
_diffrn_measured_fraction_theta_full    0.980
_diffrn_reflns_limit_h_min              -8
_diffrn_reflns_limit_h_max              8
_diffrn_reflns_limit_k_min              -13
_diffrn_reflns_limit_k_max              13
_diffrn_reflns_limit_l_min              -13
_diffrn_reflns_limit_l_max              13

_refine_special_details                 
;
;

_reflns_number_total                    3109
_reflns_number_gt                       3075
_reflns_threshold_expression            'I > 2\s(I)'

_refine_ls_structure_factor_coef        Fsqd
_refine_ls_matrix_type                  full
_refine_ls_R_factor_all                 0.0296
_refine_ls_R_factor_gt                  0.0293
_refine_ls_wR_factor_gt                 0.0795
_refine_ls_wR_factor_ref                0.0798
_refine_ls_goodness_of_fit_ref          1.051
_refine_ls_restrained_S_all             1.050
_refine_ls_number_reflns                3109
_refine_ls_number_parameters            181
_refine_ls_number_restraints            1
_refine_ls_number_constraints           ?
_refine_ls_hydrogen_treatment           mixed
_refine_ls_weighting_scheme             calc
_refine_ls_weighting_details            
    'w=1/[\s^2^(Fo^2^)+(0.0476P)^2^+0.0513P] where P=(Fo^2^+2Fc^2^)/3'

_atom_sites_solution_hydrogens          geom
_atom_sites_solution_primary            ?
_atom_sites_solution_secondary          ?

_refine_ls_shift/su_max                 0.000
_refine_ls_shift/su_mean                0.000
_refine_diff_density_max                0.119
_refine_diff_density_min                -0.139
_refine_ls_extinction_method            none
_refine_ls_extinction_coef              ?
_refine_ls_abs_structure_details        
;

Flack x determined using 1404 quotients [(I+)-(I-)]/[(I+)+(I-)]
(Parsons, Flack and Wagner, Acta Cryst. B69 (2013) 249-259).
;
_refine_ls_abs_structure_Flack          0.09(4)

loop_
    _atom_type_symbol
    _atom_type_description
    _atom_type_scat_dispersion_real
    _atom_type_scat_dispersion_imag
    _atom_type_scat_source
    C C 0.0181 0.0091 'International Tables Vol C Tables 4.2.6.8 and 6.1.1.4'
    H H 0.0000 0.0000 'International Tables Vol C Tables 4.2.6.8 and 6.1.1.4'
    O O 0.0492 0.0322 'International Tables Vol C Tables 4.2.6.8 and 6.1.1.4'

_computing_data_collection              ?
_computing_cell_refinement              'SAINT V8.38A (Bruker AXS Inc., 2017)'
_computing_data_reduction               'SAINT V8.38A (Bruker AXS Inc., 2017)'
_computing_structure_solution           'SHELXT 2014/5 (Sheldrick, 2014)'
_computing_structure_refinement         'SHELXL-2016/6 (Sheldrick, 2016)'
_computing_molecular_graphics           'shelXle (C.B. Huebschle, rev 833)'
_computing_publication_material         ?

loop_
    _atom_site_type_symbol
    _atom_site_label
    _atom_site_fract_x
    _atom_site_fract_y
    _atom_site_fract_z
    _atom_site_U_iso_or_equiv
    _atom_site_adp_type
    _atom_site_calc_flag
    _atom_site_refinement_flags_adp
    _atom_site_refinement_flags_occupancy
    _atom_site_refinement_flags_posn
    _atom_site_occupancy
    _atom_site_disorder_assembly
    _atom_site_disorder_group
    O O1 0.1725(2) 0.08556(12) 0.69606(13) 0.0517(3) Uani d . . . 1 . .
    H H1O 0.259(4) 0.040(2) 0.701(2) 0.078 Uiso calc U . R 1 . .
    C C1 0.2087(3) 0.17702(16) 0.91015(16) 0.0476(4) Uani d . . . 1 . .
    O O2 0.1408(2) 0.47209(11) 0.47262(11) 0.0477(3) Uani d . . . 1 . .
    H H2O 0.056(5) 0.519(3) 0.4340(17) 0.072 Uiso calc U . R 1 . .
    C C2 0.2427(2) 0.18902(14) 0.77410(14) 0.0377(3) Uani d . . . 1 . .
    H H2 0.39367 0.200069 0.776967 0.045 Uiso calc U . R 1 . .
    C C3 0.1264(2) 0.31120(14) 0.72316(14) 0.0368(3) Uani d . . . 1 . .
    O O4 0.5006(2) 0.91846(14) 0.71049(18) 0.0681(4) Uani d . . . 1 . .
    C C4 0.0606(3) 0.36056(17) 0.84481(18) 0.0495(4) Uani d . . . 1 . .
    H H4 0.040167 0.449996 0.845735 0.059 Uiso calc U . R 1 . .
    C C15 -0.0587(3) 0.28617(18) 0.61433(18) 0.0499(4) Uani d . . . 1 . .
    H H15A -0.139934 0.360099 0.594657 0.075 Uiso calc U . R 1 . .
    H H15B -0.145969 0.222664 0.638352 0.075 Uiso calc U . R 1 . .
    H H15C -0.006432 0.260009 0.541567 0.075 Uiso calc U . R 1 . .
    C C5 -0.1263(4) 0.2853(2) 0.8729(2) 0.0676(6) Uani d . . . 1 . .
    H H5A -0.178864 0.32009 0.943261 0.081 Uiso calc U . R 1 . .
    H H5B -0.240351 0.281457 0.799699 0.081 Uiso calc U . R 1 . .
    C C14 0.3543(4) 0.0827(2) 0.9868(2) 0.0695(6) Uani d . . . 1 . .
    H H14A 0.323515 0.002366 0.950645 0.104 Uiso calc U . R 1 . .
    H H14B 0.33331 0.082588 1.072181 0.104 Uiso calc U . R 1 . .
    H H14C 0.49802 0.103529 0.986052 0.104 Uiso calc U . R 1 . .
    C C6 -0.0282(4) 0.1573(2) 0.9060(2) 0.0617(5) Uani d . . . 1 . .
    H H6A -0.086511 0.097223 0.842123 0.074 Uiso calc U . R 1 . .
    H H6B -0.052411 0.129457 0.987117 0.074 Uiso calc U . R 1 . .
    C C7 0.2376(4) 0.31294(18) 0.94942(17) 0.0557(5) Uani d . . . 1 . .
    H H7A 0.210886 0.328057 1.03319 0.067 Uiso calc U . R 1 . .
    H H7B 0.374683 0.344967 0.942838 0.067 Uiso calc U . R 1 . .
    C C9 0.1969(2) 0.51169(14) 0.60220(14) 0.0389(3) Uani d . . . 1 . .
    H H9 0.071093 0.541507 0.630217 0.047 Uiso calc U . R 1 . .
    C C8 0.2868(2) 0.39947(15) 0.68133(15) 0.0399(3) Uani d . . . 1 . .
    H H8A 0.381622 0.429078 0.756428 0.048 Uiso calc U . R 1 . .
    H H8B 0.370393 0.352228 0.633152 0.048 Uiso calc U . R 1 . .
    C C10 0.3563(3) 0.61384(15) 0.61228(15) 0.0409(3) Uani d . . . 1 . .
    H H10 0.462167 0.604919 0.566249 0.049 Uiso calc U . R 1 . .
    C C13 0.2084(3) 0.7458(2) 0.7648(2) 0.0575(5) Uani d . . . 1 . .
    H H13A 0.12115 0.81378 0.729913 0.086 Uiso calc U . R 1 . .
    H H13B 0.285367 0.767406 0.847319 0.086 Uiso calc U . R 1 . .
    H H13C 0.121664 0.67524 0.770947 0.086 Uiso calc U . R 1 . .
    O O3 0.6657(2) 0.78350(13) 0.61179(15) 0.0585(4) Uani d . . . 1 . .
    H H3O 0.730(4) 0.844(3) 0.599(3) 0.088 Uiso calc U . R 1 . .
    C C12 0.5134(3) 0.81520(15) 0.66983(15) 0.0431(3) Uani d . . . 1 . .
    C C11 0.3598(3) 0.71606(15) 0.68117(14) 0.0402(3) Uani d . . . 1 . .

loop_
    _atom_site_aniso_label
    _atom_site_aniso_U_11
    _atom_site_aniso_U_22
    _atom_site_aniso_U_33
    _atom_site_aniso_U_12
    _atom_site_aniso_U_13
    _atom_site_aniso_U_23
    O1 0.0567(7) 0.0322(6) 0.0610(7) 0.0023(5) -0.0004(6) -0.0114(5)
    C1 0.0614(10) 0.0351(8) 0.0444(8) -0.0069(7) 0.0060(7) 0.0034(6)
    O2 0.0621(7) 0.0342(6) 0.0427(6) 0.0127(5) 0.0004(5) 0.0017(5)
    C2 0.0388(7) 0.0281(7) 0.0439(7) -0.0022(5) 0.0029(6) -0.0021(6)
    C3 0.0383(7) 0.0283(7) 0.0427(7) -0.0005(5) 0.0053(5) -0.0007(5)
    O4 0.0646(8) 0.0398(7) 0.1033(12) -0.0070(6) 0.0249(8) -0.0187(8)
    C4 0.0620(10) 0.0344(8) 0.0556(9) 0.0023(7) 0.0204(8) -0.0038(7)
    C15 0.0443(8) 0.0403(9) 0.0588(10) -0.0044(7) -0.0049(7) 0.0019(7)
    C5 0.0681(12) 0.0619(13) 0.0835(14) 0.0032(10) 0.0403(11) 0.0025(11)
    C14 0.0908(15) 0.0525(12) 0.0574(10) -0.0021(11) -0.0040(10) 0.0165(9)
    C6 0.0711(12) 0.0512(12) 0.0696(12) -0.0093(10) 0.0306(10) 0.0076(9)
    C7 0.0832(13) 0.0422(10) 0.0404(8) -0.0093(9) 0.0096(8) -0.0050(7)
    C9 0.0445(7) 0.0298(7) 0.0419(7) 0.0031(6) 0.0071(6) 0.0002(6)
    C8 0.0392(7) 0.0340(8) 0.0439(7) -0.0004(6) 0.0025(6) 0.0055(6)
    C10 0.0465(8) 0.0332(8) 0.0432(7) 0.0034(6) 0.0098(6) 0.0052(6)
    C13 0.0627(11) 0.0528(11) 0.0617(11) -0.0055(9) 0.0238(9) -0.0112(9)
    O3 0.0650(8) 0.0386(7) 0.0791(9) -0.0070(6) 0.0320(7) -0.0015(6)
    C12 0.0461(8) 0.0348(8) 0.0461(8) 0.0022(6) 0.0038(6) 0.0006(6)
    C11 0.0460(8) 0.0348(8) 0.0386(7) 0.0015(6) 0.0056(6) 0.0038(6)

_geom_special_details                   
;

All esds (except the esd in the dihedral angle between two l.s. planes)
are estimated using the full covariance matrix.  The cell esds are taken
into account individually in the estimation of esds in distances, angles
and torsion angles; correlations between esds in cell parameters are only
used when they are defined by crystal symmetry.  An approximate (isotropic)
treatment of cell esds is used for estimating esds involving l.s. planes.
;

loop_
    _geom_bond_atom_site_label_1
    _geom_bond_atom_site_label_2
    _geom_bond_site_symmetry_2
    _geom_bond_distance
    _geom_bond_publ_flag
    O1 C2 . 1.4237(19) ?
    O1 H1O . 0.75(3) ?
    C1 C14 . 1.521(3) ?
    C1 C7 . 1.536(3) ?
    C1 C2 . 1.537(2) ?
    C1 C6 . 1.542(3) ?
    O2 C9 . 1.4415(19) ?
    O2 H2O . 0.80(3) ?
    C2 C3 . 1.570(2) ?
    C2 H2 . 0.98 ?
    C3 C15 . 1.527(2) ?
    C3 C8 . 1.547(2) ?
    C3 C4 . 1.558(2) ?
    O4 C12 . 1.213(2) ?
    C4 C7 . 1.531(3) ?
    C4 C5 . 1.541(3) ?
    C4 H4 . 0.98 ?
    C15 H15A . 0.96 ?
    C15 H15B . 0.96 ?
    C15 H15C . 0.96 ?
    C5 C6 . 1.540(3) ?
    C5 H5A . 0.97 ?
    C5 H5B . 0.97 ?
    C14 H14A . 0.96 ?
    C14 H14B . 0.96 ?
    C14 H14C . 0.96 ?
    C6 H6A . 0.97 ?
    C6 H6B . 0.97 ?
    C7 H7A . 0.97 ?
    C7 H7B . 0.97 ?
    C9 C10 . 1.504(2) ?
    C9 C8 . 1.535(2) ?
    C9 H9 . 0.98 ?
    C8 H8A . 0.97 ?
    C8 H8B . 0.97 ?
    C10 C11 . 1.334(2) ?
    C10 H10 . 0.93 ?
    C13 C11 . 1.497(3) ?
    C13 H13A . 0.96 ?
    C13 H13B . 0.96 ?
    C13 H13C . 0.96 ?
    O3 C12 . 1.318(2) ?
    O3 H3O . 0.80(4) ?
    C12 C11 . 1.487(2) ?

loop_
    _geom_angle_atom_site_label_1
    _geom_angle_atom_site_label_2
    _geom_angle_atom_site_label_3
    _geom_angle_site_symmetry_1
    _geom_angle_site_symmetry_3
    _geom_angle
    _geom_angle_publ_flag
    C2 O1 H1O . . 109.5 ?
    C14 C1 C7 . . 117.90(17) ?
    C14 C1 C2 . . 112.78(17) ?
    C7 C1 C2 . . 98.67(13) ?
    C14 C1 C6 . . 115.32(17) ?
    C7 C1 C6 . . 101.92(17) ?
    C2 C1 C6 . . 108.47(15) ?
    C9 O2 H2O . . 109.5 ?
    O1 C2 C1 . . 114.27(14) ?
    O1 C2 C3 . . 112.60(12) ?
    C1 C2 C3 . . 104.90(13) ?
    O1 C2 H2 . . 108.3 ?
    C1 C2 H2 . . 108.3 ?
    C3 C2 H2 . . 108.3 ?
    C15 C3 C8 . . 110.77(13) ?
    C15 C3 C4 . . 114.02(14) ?
    C8 C3 C4 . . 110.37(13) ?
    C15 C3 C2 . . 111.59(13) ?
    C8 C3 C2 . . 108.82(12) ?
    C4 C3 C2 . . 100.80(12) ?
    C7 C4 C5 . . 100.21(17) ?
    C7 C4 C3 . . 102.55(14) ?
    C5 C4 C3 . . 110.10(16) ?
    C7 C4 H4 . . 114.2 ?
    C5 C4 H4 . . 114.2 ?
    C3 C4 H4 . . 114.2 ?
    C3 C15 H15A . . 109.5 ?
    C3 C15 H15B . . 109.5 ?
    H15A C15 H15B . . 109.5 ?
    C3 C15 H15C . . 109.5 ?
    H15A C15 H15C . . 109.5 ?
    H15B C15 H15C . . 109.5 ?
    C6 C5 C4 . . 102.70(17) ?
    C6 C5 H5A . . 111.2 ?
    C4 C5 H5A . . 111.2 ?
    C6 C5 H5B . . 111.2 ?
    C4 C5 H5B . . 111.2 ?
    H5A C5 H5B . . 109.1 ?
    C1 C14 H14A . . 109.5 ?
    C1 C14 H14B . . 109.5 ?
    H14A C14 H14B . . 109.5 ?
    C1 C14 H14C . . 109.5 ?
    H14A C14 H14C . . 109.5 ?
    H14B C14 H14C . . 109.5 ?
    C5 C6 C1 . . 104.11(16) ?
    C5 C6 H6A . . 110.9 ?
    C1 C6 H6A . . 110.9 ?
    C5 C6 H6B . . 110.9 ?
    C1 C6 H6B . . 110.9 ?
    H6A C6 H6B . . 109.0 ?
    C4 C7 C1 . . 95.06(14) ?
    C4 C7 H7A . . 112.7 ?
    C1 C7 H7A . . 112.7 ?
    C4 C7 H7B . . 112.7 ?
    C1 C7 H7B . . 112.7 ?
    H7A C7 H7B . . 110.2 ?
    O2 C9 C10 . . 109.03(13) ?
    O2 C9 C8 . . 107.42(12) ?
    C10 C9 C8 . . 111.47(13) ?
    O2 C9 H9 . . 109.6 ?
    C10 C9 H9 . . 109.6 ?
    C8 C9 H9 . . 109.6 ?
    C9 C8 C3 . . 116.90(13) ?
    C9 C8 H8A . . 108.1 ?
    C3 C8 H8A . . 108.1 ?
    C9 C8 H8B . . 108.1 ?
    C3 C8 H8B . . 108.1 ?
    H8A C8 H8B . . 107.3 ?
    C11 C10 C9 . . 126.02(15) ?
    C11 C10 H10 . . 117.0 ?
    C9 C10 H10 . . 117.0 ?
    C11 C13 H13A . . 109.5 ?
    C11 C13 H13B . . 109.5 ?
    H13A C13 H13B . . 109.5 ?
    C11 C13 H13C . . 109.5 ?
    H13A C13 H13C . . 109.5 ?
    H13B C13 H13C . . 109.5 ?
    C12 O3 H3O . . 109.5 ?
    O4 C12 O3 . . 121.74(17) ?
    O4 C12 C11 . . 122.92(16) ?
    O3 C12 C11 . . 115.34(15) ?
    C10 C11 C12 . . 119.50(15) ?
    C10 C11 C13 . . 125.24(17) ?
    C12 C11 C13 . . 115.10(15) ?

loop_
    _geom_torsion_atom_site_label_1
    _geom_torsion_atom_site_label_2
    _geom_torsion_atom_site_label_3
    _geom_torsion_atom_site_label_4
    _geom_torsion_site_symmetry_1
    _geom_torsion_site_symmetry_2
    _geom_torsion_site_symmetry_3
    _geom_torsion_site_symmetry_4
    _geom_torsion
    _geom_torsion_publ_flag
    C14 C1 C2 O1 . . . . 70.75(19) ?
    C7 C1 C2 O1 . . . . -163.98(15) ?
    C6 C1 C2 O1 . . . . -58.25(19) ?
    C14 C1 C2 C3 . . . . -165.46(15) ?
    C7 C1 C2 C3 . . . . -40.20(16) ?
    C6 C1 C2 C3 . . . . 65.54(17) ?
    O1 C2 C3 C15 . . . . 9.29(19) ?
    C1 C2 C3 C15 . . . . -115.56(15) ?
    O1 C2 C3 C8 . . . . -113.24(15) ?
    C1 C2 C3 C8 . . . . 121.91(13) ?
    O1 C2 C3 C4 . . . . 130.70(14) ?
    C1 C2 C3 C4 . . . . 5.85(15) ?
    C15 C3 C4 C7 . . . . 150.72(14) ?
    C8 C3 C4 C7 . . . . -83.85(16) ?
    C2 C3 C4 C7 . . . . 31.05(16) ?
    C15 C3 C4 C5 . . . . 44.8(2) ?
    C8 C3 C4 C5 . . . . 170.20(15) ?
    C2 C3 C4 C5 . . . . -74.90(18) ?
    C7 C4 C5 C6 . . . . -40.6(2) ?
    C3 C4 C5 C6 . . . . 66.9(2) ?
    C4 C5 C6 C1 . . . . 7.0(2) ?
    C14 C1 C6 C5 . . . . 157.85(19) ?
    C7 C1 C6 C5 . . . . 28.9(2) ?
    C2 C1 C6 C5 . . . . -74.6(2) ?
    C5 C4 C7 C1 . . . . 57.50(17) ?
    C3 C4 C7 C1 . . . . -55.94(16) ?
    C14 C1 C7 C4 . . . . 179.71(18) ?
    C2 C1 C7 C4 . . . . 58.11(15) ?
    C6 C1 C7 C4 . . . . -52.97(17) ?
    O2 C9 C8 C3 . . . . -84.00(16) ?
    C10 C9 C8 C3 . . . . 156.62(14) ?
    C15 C3 C8 C9 . . . . 43.89(19) ?
    C4 C3 C8 C9 . . . . -83.35(17) ?
    C2 C3 C8 C9 . . . . 166.91(13) ?
    O2 C9 C10 C11 . . . . 138.45(15) ?
    C8 C9 C10 C11 . . . . -103.13(18) ?
    C9 C10 C11 C12 . . . . -173.00(14) ?
    C9 C10 C11 C13 . . . . 2.1(3) ?
    O4 C12 C11 C10 . . . . 165.92(18) ?
    O3 C12 C11 C10 . . . . -13.9(2) ?
    O4 C12 C11 C13 . . . . -9.7(2) ?
    O3 C12 C11 C13 . . . . 170.49(17) ?

_shelx_res_file                         
;

TITL LDLB45_0m_a.res in P2(1)
    LDLB45_0m.res
    created by SHELXL-2016/6 at 15:51:01 on 16-Dec-2019
CELL 1.54178 6.4802 10.8539 10.8186 90.000 101.555 90.000
ZERR 2.00 0.0004 0.0007 0.0007 0.000 0.002 0.000
LATT -1
SYMM -x, y+1/2, -z
SFAC C H O
UNIT 30 48 8
LIST 6 ! automatically inserted. Change 6 to 4 for CHECKCIF!!
TEMP 23.850
SIZE 0.110 0.282 0.132
ACTA
L.S. 15
FMAP 2
PLAN -4 0 0.00
HTAB
BOND $H
CONF
WGHT    0.047600    0.051300
FVAR       3.11454
O1    3    0.172479    0.085556    0.696061    11.00000    0.05672    0.03221 =
         0.06104   -0.01144   -0.00042    0.00231
AFIX 148
H1O   2    0.259497    0.039657    0.701492    11.00000   -1.50000
AFIX   0
C1    1    0.208730    0.177018    0.910148    11.00000    0.06136    0.03507 =
         0.04439    0.00339    0.00596   -0.00692
O2    3    0.140802    0.472093    0.472618    11.00000    0.06212    0.03420 =
         0.04271    0.00170    0.00041    0.01269
AFIX 148
H2O   2    0.055859    0.518593    0.433958    11.00000   -1.50000
AFIX   0
C2    1    0.242693    0.189018    0.774104    11.00000    0.03882    0.02815 =
         0.04395   -0.00212    0.00293   -0.00224
AFIX  13
H2    2    0.393670    0.200069    0.776967    11.00000   -1.20000
AFIX   0
C3    1    0.126400    0.311204    0.723160    11.00000    0.03829    0.02830 =
         0.04269   -0.00065    0.00531   -0.00049
O4    3    0.500642    0.918464    0.710495    11.00000    0.06464    0.03979 =
         0.10332   -0.01866    0.02487   -0.00696
C4    1    0.060600    0.360564    0.844813    11.00000    0.06196    0.03441 =
         0.05563   -0.00383    0.02044    0.00229
AFIX  13
H4    2    0.040167    0.449996    0.845735    11.00000   -1.20000
AFIX   0
C15   1   -0.058670    0.286169    0.614328    11.00000    0.04430    0.04034 =
         0.05880    0.00190   -0.00487   -0.00440
AFIX 137
H15A  2   -0.139934    0.360099    0.594657    11.00000   -1.50000
H15B  2   -0.145969    0.222664    0.638352    11.00000   -1.50000
H15C  2   -0.006432    0.260009    0.541567    11.00000   -1.50000
AFIX   0
C5    1   -0.126330    0.285332    0.872933    11.00000    0.06808    0.06188 =
         0.08345    0.00253    0.04035    0.00316
AFIX  23
H5A   2   -0.178864    0.320090    0.943261    11.00000   -1.20000
H5B   2   -0.240351    0.281457    0.799699    11.00000   -1.20000
AFIX   0
C14   1    0.354317    0.082677    0.986826    11.00000    0.09083    0.05248 =
         0.05735    0.01650   -0.00405   -0.00214
AFIX 137
H14A  2    0.323515    0.002366    0.950645    11.00000   -1.50000
H14B  2    0.333310    0.082588    1.072181    11.00000   -1.50000
H14C  2    0.498020    0.103529    0.986052    11.00000   -1.50000
AFIX   0
C6    1   -0.028232    0.157296    0.906008    11.00000    0.07114    0.05122 =
         0.06957    0.00763    0.03056   -0.00928
AFIX  23
H6A   2   -0.086511    0.097223    0.842123    11.00000   -1.20000
H6B   2   -0.052411    0.129457    0.987117    11.00000   -1.20000
AFIX   0
C7    1    0.237557    0.312936    0.949419    11.00000    0.08324    0.04220 =
         0.04037   -0.00497    0.00959   -0.00930
AFIX  23
H7A   2    0.210886    0.328057    1.033190    11.00000   -1.20000
H7B   2    0.374683    0.344967    0.942838    11.00000   -1.20000
AFIX   0
C9    1    0.196910    0.511691    0.602196    11.00000    0.04452    0.02976 =
         0.04190    0.00024    0.00708    0.00312
AFIX  13
H9    2    0.071093    0.541507    0.630217    11.00000   -1.20000
AFIX   0
C8    1    0.286817    0.399467    0.681326    11.00000    0.03920    0.03398 =
         0.04394    0.00551    0.00252   -0.00039
AFIX  23
H8A   2    0.381622    0.429078    0.756428    11.00000   -1.20000
H8B   2    0.370393    0.352228    0.633152    11.00000   -1.20000
AFIX   0
C10   1    0.356300    0.613840    0.612282    11.00000    0.04653    0.03318 =
         0.04322    0.00515    0.00982    0.00343
AFIX  43
H10   2    0.462167    0.604919    0.566249    11.00000   -1.20000
AFIX   0
C13   1    0.208416    0.745788    0.764844    11.00000    0.06271    0.05285 =
         0.06170   -0.01118    0.02381   -0.00555
AFIX 137
H13A  2    0.121150    0.813780    0.729913    11.00000   -1.50000
H13B  2    0.285367    0.767406    0.847319    11.00000   -1.50000
H13C  2    0.121664    0.675240    0.770947    11.00000   -1.50000
AFIX   0
O3    3    0.665732    0.783502    0.611793    11.00000    0.06504    0.03864 =
         0.07911   -0.00148    0.03202   -0.00701
AFIX 148
H3O   2    0.730063    0.843705    0.599176    11.00000   -1.50000
AFIX   0
C12   1    0.513359    0.815200    0.669831    11.00000    0.04610    0.03479 =
         0.04613    0.00059    0.00375    0.00223
C11   1    0.359809    0.716058    0.681171    11.00000    0.04604    0.03477 =
         0.03858    0.00382    0.00556    0.00150
REM #####
HKLF 4 1 1 0 0 0 1 0 0 0 1


REM  LDLB45_0m_a.res in P2(1)
REM R1 =  0.0293 for    3075 Fo > 4sig(Fo)  and  0.0296 for all    3109 data
REM    181 parameters refined using      1 restraints

END

WGHT      0.0476      0.0513

REM Instructions for potential hydrogen bonds
EQIV $1 x, y-1, z
HTAB O1 O4_$1
EQIV $2 -x, y+1/2, -z+1
HTAB O2 O1_$2
EQIV $3 -x+1, y+1/2, -z+1
HTAB O3 O2_$3

REM Highest difference peak  0.119,  deepest hole -0.139,  1-sigma level  0.025
Q1    1   0.4350  0.9202  0.6386  11.00000  0.05    0.12
Q2    1   0.2254  0.1741  0.8518  11.00000  0.05    0.11
Q3    1   0.3176  0.6811  0.6275  11.00000  0.05    0.10
Q4    1   0.2848  0.5638  0.6163  11.00000  0.05    0.10
;
_shelx_res_checksum                     38854

_shelx_hkl_file                         
;
  -1   0   0 4345.97  130.39
  -2   0   0 5192.08  147.79
  -2   0   0 4962.30  158.28
  -3   0   0 1713.83   56.39
  -3   0   0 1781.62   51.99
  -4   0   0   23.80    2.60
  -4   0   0   25.90    4.70
  -4   0   0   24.90    3.00
  -4   0   0   29.40    2.70
   5   0   0   41.10    4.20
   5   0   0   40.00    3.90
  -5   0   0   38.30    3.50
   5   0   0   40.60    4.80
   5   0   0   35.00    4.70
  -5   0   0   43.20    8.40
  -5   0   0   39.90    4.20
  -5   0   0   37.50    3.50
   5   0   0   33.10    3.60
  -5   0   0   37.90    3.10
  -5   0   0   43.60    3.90
   6   0   0  385.36   15.80
  -6   0   0  394.76   13.60
   6   0   0  382.86   16.70
  -6   0   0  393.16   15.50
   6   0   0  365.56   16.70
  -6   0   0  385.86   14.80
   6   0   0  364.76   15.10
   6   0   0  374.66   15.30
  -7   0   0  263.37    8.90
   7   0   0  230.68    9.80
  -7   0   0  233.38   10.10
   7   0   0  247.48   10.70
  -7   0   0  237.18    9.60
   7   0   0  254.47   12.80
   8   0   0   19.80    2.00
   0  -1   0    0.10    0.10
   0  -1   0   -0.50    0.60
  -2  -1   0  928.61   37.80
  -2  -1   0  896.11   29.60
   2   1   0  918.41   31.50
  -2   1   0  923.81   30.70
  -3  -1   0 2882.11  104.99
  -3  -1   0 2973.20   85.99
  -3  -1   0 2856.91   89.99
  -3   1   0 3050.39   86.29
   3   1   0 2989.10   89.09
  -3   1   0 2988.20   91.59
  -4  -1   0  395.46   14.70
  -4  -1   0  426.36   15.50
  -4  -1   0  415.16   20.10
  -4   1   0  439.16   17.10
  -4   1   0  444.26   21.50
  -4   1   0  427.76   15.60
  -4   1   0  437.76   15.20
  -5  -1   0   12.80    3.80
  -5  -1   0   10.00    2.20
  -5  -1   0   15.00    2.80
   5  -1   0   19.40    3.70
  -5  -1   0   14.40    2.40
   5  -1   0   19.90    3.00
   5  -1   0   11.90    3.00
  -5  -1   0   17.20    2.40
  -5   1   0   21.50    2.70
   5   1   0   23.70    3.90
  -5   1   0   18.50    3.00
  -5   1   0   18.50    3.00
   5   1   0    8.40    2.50
  -5   1   0   21.10    4.00
   5   1   0   22.90    3.90
  -5   1   0   19.40    2.50
   5   1   0   17.00    3.70
  -5   1   0   12.90    4.60
   5   1   0   19.20    3.20
   5   1   0   21.40    4.50
  -6  -1   0  210.48    9.60
   6  -1   0  187.48   10.30
   6  -1   0  221.58   10.20
   6  -1   0  209.68   10.20
   6  -1   0  212.28   11.00
  -6  -1   0  218.08   10.20
  -6  -1   0  206.18    8.30
   6   1   0  198.08   10.20
  -6   1   0  206.78   10.00
  -6   1   0  205.88    8.20
   6   1   0  197.68   10.10
   6   1   0  199.78   11.40
   6   1   0  197.48   13.40
  -6   1   0  200.08   11.20
   6   1   0  202.38   11.60
   6   1   0  201.38   10.10
  -6   1   0  215.98    9.50
   7  -1   0    9.20    2.10
   7  -1   0    8.00    1.80
  -7  -1   0    8.50    1.40
   7  -1   0    9.00    2.50
  -7  -1   0    8.30    1.70
  -7  -1   0    3.90    1.10
  -7   1   0    5.90    2.50
   7   1   0   10.50    2.40
   7   1   0    9.20    1.90
   7   1   0    8.90    2.60
   7   1   0   11.10    2.30
  -7   1   0    5.30    1.30
  -7   1   0    7.60    1.20
   7   1   0    6.00    2.20
   8  -1   0    0.10    0.70
   8   1   0    0.90    1.00
   1  -2   0  753.22   28.80
  -1   2   0  752.02   24.50
   1   2   0  792.22   28.60
   1   2   0  730.43   29.10
  -2  -2   0 3076.69   93.59
   2   2   0 3300.87   99.29
  -2   2   0 3233.58   96.19
  -3  -2   0 2164.58   65.39
  -3  -2   0 2070.09   61.49
  -3  -2   0 1936.91   79.29
   3  -2   0 2128.39   62.99
  -3   2   0 2195.58   64.09
  -3   2   0 2044.50   61.89
  -3   2   0 2142.09   67.99
  -4  -2   0  215.08    9.20
  -4  -2   0  205.78    8.70
  -4  -2   0  222.88   13.00
  -4   2   0  210.38    8.90
  -4   2   0  217.28    9.40
  -4   2   0  232.58   14.50
  -5  -2   0 1727.93   53.19
  -5  -2   0 1623.94   51.49
  -5  -2   0 1659.53   50.99
   5  -2   0 1675.23   53.99
   5  -2   0 1699.33   52.49
  -5  -2   0 1731.43   52.39
  -5  -2   0 1740.83   61.19
  -5   2   0 1657.73   53.49
  -5   2   0 1735.23   52.19
   5   2   0 1718.13   53.69
   5   2   0 1756.62   60.39
  -5   2   0 1610.34   62.89
  -5   2   0 1750.02   51.99
   5   2   0 1730.43   55.49
   5   2   0 1694.83   53.89
  -5   2   0 1733.23   50.89
   5   2   0 1697.23   53.69
   5   2   0 1772.12   56.39
   5   2   0 1700.93   52.89
  -5   2   0 1725.53   52.99
  -5   2   0 1720.53   55.39
   6  -2   0   79.09    5.70
  -6  -2   0   82.89    4.60
   6  -2   0   83.89    6.40
  -6  -2   0   81.29    5.30
  -6  -2   0   79.89    5.60
   6  -2   0   86.99    5.80
  -6   2   0   83.59    4.30
  -6   2   0   80.89    5.40
   6   2   0   76.19    7.00
   6   2   0   76.89    6.80
   6   2   0   87.39    6.40
   6   2   0   85.59    6.00
   6   2   0   83.29    6.30
  -6   2   0   79.49    5.00
  -6   2   0   91.99    8.30
   7  -2   0  128.99    6.60
   7  -2   0  109.39    5.70
  -7  -2   0  131.59    6.20
   7  -2   0  126.29    7.00
  -7  -2   0  130.69    6.40
  -7  -2   0  136.09    5.30
   7   2   0  121.29    6.90
   7   2   0  127.99    8.30
   7   2   0  108.99    5.80
   7   2   0  112.89    7.10
  -7   2   0  119.09    4.90
  -7   2   0  116.89    5.20
   7   2   0  120.79    6.30
   0  -3   0    0.50    0.60
   0   3   0   -1.00    1.20
   1  -3   0 7070.49  207.98
  -1   3   0 6894.61  200.58
  -2  -3   0 8605.84  252.47
  -2   3   0 9107.69  256.37
  -3  -3   0  977.60   32.40
   3  -3   0  963.60   30.70
   3  -3   0  960.60   31.10
  -3  -3   0  956.00   29.10
  -3  -3   0  999.70   45.80
  -3   3   0  925.61   29.70
  -3   3   0  929.31   31.50
  -3   3   0  959.50   35.60
  -4  -3   0 1301.37   44.50
   4  -3   0 1172.48   39.10
  -4  -3   0 1309.87   39.10
   4  -3   0 1247.88   40.80
   4  -3   0 1282.37   40.10
  -4  -3   0 1200.98   38.60
   4   3   0 1319.37   39.90
  -4   3   0 1231.08   47.70
  -4   3   0 1235.48   37.60
   4   3   0 1213.58   40.10
   4   3   0 1300.57   42.80
   4   3   0 1236.58   41.60
   4   3   0 1234.48   40.30
  -4   3   0 1217.08   38.70
  -4   3   0 1312.07   38.80
  -4   3   0 1328.17   41.90
  -4   3   0 1251.57   39.20
   4   3   0 1291.07   49.50
  -5  -3   0   26.80    3.00
  -5  -3   0   32.90    3.10
   5  -3   0   32.10    3.70
  -5  -3   0   25.30    3.40
  -5  -3   0   26.60    5.20
  -5  -3   0   24.70    2.90
   5   3   0   27.20    3.90
   5   3   0   23.70    4.70
   5   3   0   27.20    4.60
  -5   3   0   28.00    3.80
  -5   3   0   24.50    7.90
   5   3   0   32.30    5.50
   5   3   0   38.90    5.30
  -5   3   0   21.40    3.70
   5   3   0   29.60    7.20
  -5   3   0   31.10    3.00
  -5   3   0   25.80    2.40
   5   3   0   20.80    3.70
  -5   3   0   27.70    3.00
   6  -3   0   22.50    2.80
  -6  -3   0   27.10    3.00
  -6  -3   0   20.90    2.60
  -6  -3   0   19.00    3.00
   6  -3   0   21.50    3.50
   6   3   0   17.60    4.20
   6   3   0   22.50    3.40
  -6   3   0   25.50    2.50
  -6   3   0   16.00    3.00
  -6   3   0   15.40    2.80
   6   3   0   22.00    3.80
   6   3   0   32.10    7.30
  -7  -3   0   12.70    2.10
  -7  -3   0   16.10    1.70
   7  -3   0   15.40    2.20
  -7  -3   0   16.30    2.00
   7  -3   0   15.80    2.40
   7   3   0   16.10    3.30
   7   3   0   16.00    2.20
   7   3   0   18.20    2.80
   7   3   0   19.90    3.20
   7   3   0   18.60    3.30
  -7   3   0   16.80    2.40
  -7   3   0   15.50    3.40
   0  -4   0 4509.45  127.99
   0  -4   0 4363.56  128.19
   0   4   0 4430.06  137.39
   1  -4   0 1777.12   52.29
   1  -4   0 1799.62   62.89
   1   4   0 1653.83   64.39
  -1   4   0 1889.41   54.29
  -2  -4   0 1643.04   49.10
   2  -4   0 1671.03   50.39
   2  -4   0 1651.03   65.59
  -2   4   0 1662.33   53.69
  -2   4   0 1714.03   48.90
  -2   4   0 1659.93   50.69
  -3  -4   0  363.56   12.00
  -3  -4   0  381.56   25.00
   3  -4   0  360.76   14.40
   3  -4   0  346.07   13.80
  -3   4   0  350.56   15.40
  -3   4   0  317.07   20.80
  -3   4   0  384.26   14.70
   4  -4   0 1011.20   33.80
   4  -4   0 1012.80   34.50
   4  -4   0  992.60   32.60
  -4  -4   0 1007.30   31.90
  -4  -4   0  971.30   31.60
  -4  -4   0 1043.00   54.19
   4  -4   0 1052.99   33.20
  -4  -4   0 1023.30   36.50
   4   4   0 1038.30   34.50
  -4   4   0 1147.89   48.20
  -4   4   0 1037.60   33.20
  -4   4   0 1010.50   34.90
   4   4   0 1033.30   36.80
   4   4   0 1026.80   33.00
   4   4   0 1012.90   33.70
   4   4   0  996.60   35.40
   4   4   0  964.20   32.40
   4   4   0 1009.20   33.90
   4   4   0 1043.90   43.10
  -4   4   0 1012.90   31.40
  -4   4   0  938.61   30.30
  -5  -4   0  139.09   10.00
   5  -4   0  122.89    7.20
  -5  -4   0  118.09    6.50
  -5  -4   0  133.69    6.50
  -5   4   0  111.89    5.00
  -5   4   0  106.19    5.70
   5   4   0  123.59    7.60
   5   4   0  124.29    9.60
  -5   4   0  106.09    7.80
   5   4   0  124.29    9.30
  -5   4   0  117.79    7.30
   5   4   0  128.89    7.20
   5   4   0  130.19    8.30
   5   4   0  122.49    7.90
  -6  -4   0   45.70    3.20
  -6  -4   0   48.80    3.80
  -6  -4   0   45.80    3.90
   6  -4   0   44.00    3.80
   6   4   0   50.19    6.00
  -6   4   0   49.40    4.30
   6   4   0   43.60    4.10
   6   4   0   54.59    5.30
   6   4   0   51.09    5.90
  -6   4   0   46.40    4.70
  -6   4   0   46.10    2.30
   6   4   0   51.29    4.90
  -7  -4   0    3.00    1.00
  -7  -4   0    1.70    1.00
  -7  -4   0    3.30    0.90
   7  -4   0    2.70    1.20
   7  -4   0    5.30    1.30
   7   4   0    3.00    2.30
   7   4   0    2.00    2.30
   7   4   0    4.40    1.90
  -7   4   0    2.60    1.30
  -7   4   0    3.30    1.30
   7   4   0    1.10    1.40
   0   5   0    9.30    3.50
  -1  -5   0 2082.19   60.29
   1  -5   0 2050.49   61.29
   1  -5   0 2061.39   74.09
   1   5   0 2070.89   77.89
  -1   5   0 2120.39   75.69
  -1   5   0 2112.29   61.29
  -2  -5   0  386.36   12.50
   2  -5   0  393.26   26.70
   2  -5   0  407.66   16.80
  -2   5   0  408.86   14.80
  -3  -5   0  184.98    8.50
   3  -5   0  180.18    9.00
  -3  -5   0  174.28    6.70
  -3  -5   0  204.58   18.80
   3  -5   0  179.38    9.30
  -3   5   0  186.18    9.30
  -4  -5   0  559.14   19.00
   4  -5   0  610.74   21.80
   4  -5   0  551.14   22.20
  -4  -5   0  566.84   22.30
   4  -5   0  563.14   19.70
   4  -5   0  564.14   20.20
   4   5   0  558.24   19.60
  -4   5   0  558.74   20.80
   4   5   0  587.14   24.60
  -4   5   0  536.25   21.80
   4   5   0  559.44   23.20
   4   5   0  539.45   21.20
   4   5   0  558.44   20.20
   4   5   0  550.44   21.40
   4   5   0  607.14   30.10
   4   5   0  584.24   21.40
   5  -5   0 1236.58   39.20
  -5  -5   0 1218.18   38.10
  -5  -5   0 1136.89   37.40
  -5  -5   0 1242.08   44.20
   5  -5   0 1133.19   37.20
   5   5   0 1242.18   40.00
   5   5   0 1257.67   44.50
   5   5   0 1205.78   40.50
   5   5   0 1222.28   39.00
   5   5   0 1219.28   40.60
  -5   5   0 1211.48   39.40
   5   5   0 1222.98   43.00
  -5   5   0 1148.19   40.80
  -6  -5   0   53.99    3.70
  -6  -5   0   54.09    3.20
  -6  -5   0   53.19    4.00
   6  -5   0   51.09    4.00
   6   5   0   50.79    5.70
  -6   5   0   54.69    4.30
   6   5   0   53.19    6.30
  -6   5   0   50.59    4.80
   6   5   0   48.40    4.60
   6   5   0   48.90    4.20
   6   5   0   50.49    5.10
   7  -5   0   36.90    2.80
  -7  -5   0   44.70    2.30
   7   5   0   46.50    3.70
  -7   5   0   45.10    2.90
   7   5   0   39.80    3.90
   7   5   0   44.10    4.40
   0  -6   0 2893.41   83.09
   0  -6   0 2763.42   87.39
   0  -6   0 2836.42   85.29
   0   6   0 2875.11  100.99
   0   6   0 3057.79  102.99
   1  -6   0 2822.72   98.79
  -1  -6   0 2766.92   81.89
   1  -6   0 2765.12   82.19
   1   6   0 2696.03  115.99
  -1   6   0 2900.51  100.69
  -1   6   0 2871.61   81.79
   2  -6   0  444.26   16.00
   2  -6   0  438.26   16.50
   2  -6   0  412.06   29.30
  -2   6   0  451.25   16.00
  -2   6   0  420.76   27.90
   3  -6   0  274.97   12.90
   3  -6   0  297.17   11.80
  -3  -6   0  292.07   10.20
   3  -6   0  275.37   12.50
  -3   6   0  273.17   11.80
   3   6   0  278.17   14.90
   3   6   0  284.87   12.40
   3   6   0  302.87   22.60
   3   6   0  250.07   14.40
  -3   6   0  291.97   12.60
   3   6   0  267.97   11.20
   3   6   0  285.47   15.60
  -3   6   0  294.37   23.90
   3   6   0  290.47   15.10
   4  -6   0  478.45   18.90
   4  -6   0  493.05   19.50
  -4  -6   0  453.55   15.80
   4  -6   0  447.66   19.20
  -4   6   0  467.45   19.00
   4   6   0  502.05   22.30
   4   6   0  451.25   17.50
   4   6   0  441.76   18.20
  -4   6   0  405.66   30.30
   4   6   0  513.35   24.40
   4   6   0  453.35   27.00
  -4   6   0  473.05   20.70
   4   6   0  460.85   16.80
   4   6   0  457.25   22.50
   4   6   0  447.56   19.50
  -5  -6   0  250.47    9.80
   5  -6   0  239.58   10.90
   5  -6   0  236.68   10.00
   5  -6   0  212.98   10.60
  -5  -6   0  226.88    9.40
  -5   6   0  238.08   10.90
  -5   6   0  212.68   11.60
   5   6   0  230.48   12.00
   5   6   0  211.58   13.70
   5   6   0  227.58   13.60
   5   6   0  236.48   11.30
   5   6   0  218.68   11.30
   5   6   0  245.18   10.70
  -6  -6   0  189.78    6.90
   6  -6   0  185.88    8.40
  -6  -6   0  183.98    7.70
  -6  -6   0  173.68    7.40
  -6   6   0  188.18    8.40
  -6   6   0  150.08    8.80
   6   6   0  187.28   10.90
   6   6   0  172.88   10.90
   6   6   0  184.48    9.60
   7  -6   0    6.60    1.20
   7   6   0    7.10    2.00
  -7   6   0    9.00    1.30
   0   7   0    5.70    4.60
   0   7   0   -0.80    3.30
   1  -7   0 1845.92   75.49
   1  -7   0 1905.51   57.69
  -1   7   0 1945.51   78.99
  -1   7   0 1925.41   56.19
  -1   7   0 1959.50   76.49
   1   7   0 1884.01   79.89
   2  -7   0 2341.27   71.39
   2  -7   0 2361.16   71.69
   2  -7   0 2052.89   71.29
  -2   7   0 2306.37   91.99
   2   7   0 2294.57   78.89
  -2   7   0 2293.47   69.79
   2   7   0 2305.47   69.99
  -2   7   0 2375.06   72.29
   2   7   0 2380.56   72.29
   2   7   0 2569.04   80.59
   2   7   0 2402.06   79.49
   2   7   0 2289.27   70.99
   2   7   0 2370.06   69.69
  -2   7   0 2449.85   70.29
   3  -7   0  189.78   10.00
   3  -7   0  188.88   10.40
   3  -7   0  187.68    9.10
   3  -7   0  194.78    8.80
   3   7   0  193.78   15.10
   3   7   0  185.58   11.70
   3   7   0  193.68    8.80
   3   7   0  193.28    8.80
   3   7   0  186.88   12.50
  -3   7   0  182.18   20.10
   3   7   0  196.08   13.20
   3   7   0  181.18   10.00
   3   7   0  171.08   10.10
  -3   7   0  196.98    9.20
  -3   7   0  201.98   11.70
   4  -7   0  335.17   15.10
  -4  -7   0  338.97   11.80
   4  -7   0  322.37   13.40
   4  -7   0  320.57   13.60
   4  -7   0  324.17   15.50
  -4   7   0  327.17   13.60
  -4   7   0  317.97   14.40
   4   7   0  323.07   12.80
  -4   7   0  318.97   26.20
   4   7   0  325.47   16.70
   4   7   0  325.67   18.00
   4   7   0  331.47   14.70
   4   7   0  336.87   13.60
   4   7   0  325.57   17.70
   4   7   0  324.87   14.90
   5  -7   0   59.39    5.40
  -5  -7   0   62.49    4.30
   5  -7   0   74.29    5.40
  -5  -7   0   67.29    4.10
   5  -7   0   74.09    5.20
  -5   7   0   70.69    5.50
   5   7   0   70.49    7.00
   5   7   0   65.79    7.40
   5   7   0   67.69    4.90
  -5   7   0   62.69    4.80
   5   7   0   75.09    6.50
  -6  -7   0   80.09    4.10
   6  -7   0   88.69    5.00
   6   7   0   87.39    6.70
  -6   7   0   94.99    5.00
   6   7   0   89.49    7.30
   6   7   0   89.89    6.00
  -6   7   0   77.39    5.10
   0  -8   0 1198.18   38.10
   0  -8   0 1268.67   55.89
   0   8   0 1270.27   60.79
   0   8   0 1223.08   41.40
  -1  -8   0   97.09    4.70
  -1  -8   0  130.39   16.00
   1  -8   0  105.49   14.90
   1  -8   0  103.39    6.50
  -1   8   0   97.89    7.30
   1   8   0  111.39    5.60
   1   8   0  101.89   14.70
  -1   8   0  103.29   14.20
  -1   8   0  107.09   15.40
  -1   8   0  109.29    6.30
  -1   8   0   93.89    4.80
   1   8   0  106.09   10.60
   1   8   0  116.39    7.60
   1   8   0  114.59    6.10
   2  -8   0  131.49    7.40
   2  -8   0  120.99    7.70
   2  -8   0  111.79    6.40
   2   8   0  118.39    6.50
  -2   8   0  128.69    6.20
  -2   8   0  124.79    8.10
   2   8   0  108.99   10.00
   2   8   0  126.79   10.30
   2   8   0  100.49    7.60
   2   8   0  116.29   10.60
  -2   8   0  131.59    6.30
  -2   8   0  131.19   16.60
   2   8   0  108.99    8.60
   2   8   0  118.69    8.10
  -2   8   0  110.89   18.50
   2   8   0  123.89    6.30
   3  -8   0  494.45   18.20
   3  -8   0  502.65   20.40
   3  -8   0  482.25   17.90
  -3   8   0  470.35   34.90
   3   8   0  491.85   26.60
  -3   8   0  435.96   18.70
  -3   8   0  493.45   17.70
   3   8   0  521.25   24.00
   3   8   0  508.25   17.80
   3   8   0  465.55   19.60
   3   8   0  484.85   19.50
   3   8   0  516.95   23.90
  -3   8   0  480.55   18.20
   3   8   0  471.25   21.20
   3   8   0  485.35   17.70
   4  -8   0  681.43   23.40
   4  -8   0  673.73   25.20
   4  -8   0  642.64   25.60
   4  -8   0  681.33   23.80
   4   8   0  629.14   26.40
   4   8   0  608.14   22.30
  -4   8   0  689.83   23.20
  -4   8   0  768.72   28.40
   4   8   0  659.63   24.80
   4   8   0  668.13   29.20
   4   8   0  656.63   23.00
   5  -8   0  189.88    8.20
   5  -8   0  182.48   11.10
   5  -8   0  186.48    9.00
  -5   8   0  171.88    8.70
  -5   8   0  181.28    8.40
   5   8   0  203.08   10.10
   5   8   0  179.88    8.20
   5   8   0  179.98   12.00
   5   8   0  196.88   11.00
   6   8   0   17.40    2.60
  -6   8   0   20.10    2.00
   0  -9   0    2.10    1.60
   0  -9   0    0.90    1.20
   0   9   0    0.00    2.20
   0   9   0   -1.30    4.20
   0   9   0    0.20    1.30
  -1  -9   0 2166.78   63.79
   1  -9   0 2144.29   65.69
   1  -9   0 2171.78   66.39
  -1   9   0 2114.69   90.49
   1   9   0 2175.28   65.19
  -1   9   0 2163.68   66.49
  -1   9   0 2095.59   92.49
   2  -9   0  787.62   28.10
   2  -9   0  726.13   26.20
   2  -9   0  792.12   28.70
   2  -9   0  759.92   26.00
  -2   9   0  806.42   27.00
  -2   9   0  799.82   28.70
   2   9   0  862.01   31.00
   2   9   0  790.02   25.70
   2   9   0  780.02   26.10
   2   9   0  724.63   28.40
  -2   9   0  758.12   24.90
  -2   9   0  801.92   48.90
   2   9   0  818.52   28.90
   3  -9   0  759.42   27.50
   3  -9   0  782.72   28.30
   3  -9   0  742.83   25.60
   3  -9   0  764.72   25.50
  -3   9   0  755.92   24.50
   3   9   0  730.73   26.50
   3   9   0  733.93   26.40
  -3   9   0  777.72   24.90
   3   9   0  766.82   31.90
   3   9   0  700.93   24.40
   3   9   0  718.13   27.90
  -3   9   0  669.13   25.70
   3   9   0  768.02   25.00
   4  -9   0  238.88   10.70
   4  -9   0  257.27   11.10
   4  -9   0  244.68   12.50
   4  -9   0  241.18   12.30
  -4   9   0  237.58    9.80
   4   9   0  228.78    9.40
   4   9   0  233.58    9.90
  -4   9   0  228.58    9.70
   4   9   0  248.48   11.50
   4   9   0  241.28   12.50
   4   9   0  231.58   14.40
   5  -9   0  107.79    5.90
   5  -9   0   99.79    5.00
  -5   9   0  105.59    5.10
   5   9   0  102.29    6.20
   5   9   0   95.69    6.60
  -5   9   0  106.89    6.00
  -6   9   0   26.50    1.90
  -6   9   0   25.90    2.10
   0 -10   0 2048.00   62.19
   0 -10   0 2001.90   61.49
   0  10   0 2035.70   61.79
   0  10   0 2006.70   64.59
   1 -10   0  990.50   34.40
   1 -10   0 1161.18   39.70
   1 -10   0  991.50   32.80
  -1 -10   0 1081.79   33.30
   1  10   0 1017.20   36.40
  -1  10   0 1052.99   36.60
  -1  10   0 1045.00   34.00
   1  10   0  996.10   33.30
   2 -10   0  514.75   18.40
   2 -10   0  505.35   19.90
   2 -10   0  502.65   20.40
  -2  10   0  503.45   20.50
  -2  10   0  498.75   15.80
   2  10   0  493.55   17.30
   2  10   0  532.55   21.50
  -2  10   0  508.95   18.70
   3 -10   0   56.19    5.50
   3 -10   0   52.69    4.40
   3 -10   0   55.99    5.30
   3 -10   0   56.49    4.70
   3  10   0   51.89    6.20
   3  10   0   54.99    3.70
  -3  10   0   58.29    3.40
  -3  10   0   55.49    4.30
   3  10   0   57.19    3.70
   4 -10   0   37.70    4.30
   4 -10   0   50.19    4.80
   4 -10   0   51.79    5.00
   4 -10   0   47.20    4.30
  -4  10   0   44.80    3.80
   4  10   0   42.90    2.90
   4  10   0   45.80    4.90
  -4  10   0   45.20    3.00
   5 -10   0   29.20    2.50
  -5  10   0   28.90    1.70
  -5  10   0   24.90    2.00
   0 -11   0   -1.50    1.00
   0 -11   0   -1.50    1.30
   0  11   0    1.20    0.90
  -1 -11   0  138.99    6.90
   1 -11   0  132.49    6.90
   1 -11   0  135.49    8.10
   1 -11   0  136.99    9.40
   1  11   0  133.69    6.70
  -1  11   0  129.29    6.90
  -1  11   0  169.58   10.80
   2 -11   0   39.10    3.80
   2 -11   0   47.30    4.50
   2 -11   0   43.60    4.40
  -2  11   0   52.29    3.80
   2  11   0   47.80    3.30
  -2  11   0   42.90    6.40
   2  11   0   73.89    8.90
   3 -11   0   45.20    4.90
   3 -11   0   47.20    4.30
   3 -11   0   42.20    4.10
   3 -11   0   51.89    3.80
   3  11   0   44.00    3.00
  -3  11   0   48.40    3.40
   4 -11   0    4.20    1.80
   4 -11   0    2.40    1.20
   4 -11   0    5.90    1.70
  -4  11   0    3.50    1.10
   0 -12   0   22.90    3.60
   0 -12   0   38.80    3.50
   0  12   0   31.70    2.50
   1 -12   0   10.50    2.40
   1 -12   0    6.50    2.00
   1 -12   0   10.90    2.10
  -1  12   0    9.90    1.70
   1  12   0    8.10    1.40
   2 -12   0   45.10    3.60
   2 -12   0   40.60    5.10
   2 -12   0   30.80    5.60
  -2  12   0   43.30    2.90
  -3  12   0  307.37   10.30
   2 -13   0   17.50    2.10
   8   0  -1    4.50    1.10
  -7   0   1   59.39    3.30
  -7   0   1   59.29    3.90
   7   0  -1   54.29    5.10
  -7   0   1   56.29    4.20
   7   0  -1   60.19    4.60
   7   0  -1   48.50    4.50
  -6   0   1  899.71   35.10
   6   0  -1  872.31   31.50
  -6   0   1  899.01   28.70
  -6   0   1  867.21   29.20
   6   0  -1  840.22   29.30
  -6   0   1  872.11   27.60
   6   0  -1  852.81   29.40
   6   0  -1  903.81   30.30
   6   0  -1  895.31   31.90
   5   0  -1  311.77   12.90
  -5   0   1  309.27   19.00
  -5   0   1  303.47   13.00
  -5   0   1  312.97   12.10
  -5   0   1  319.07   11.40
  -5   0   1  303.37   14.20
  -5   0   1  330.67   12.70
   5   0  -1  306.67   14.10
   5   0  -1  295.37   12.70
  -4   0   1 3206.08   97.99
  -4   0   1 3031.00   92.19
  -4   0   1 3010.30   89.79
  -4   0   1 3042.10   90.49
  -3   0   1 3118.19   86.89
  -3   0   1 2923.01  108.59
  -3   0   1 2891.21   91.29
  -2   0   1  670.93   22.60
  -2   0   1  605.54   30.40
  -2   0  -1  137.99    7.40
  -3   0  -1  434.26   14.90
  -3   0  -1  441.06   18.90
  -4   0  -1    0.90    1.20
  -4   0  -1    2.50    1.80
  -4   0  -1    2.30    1.50
  -4   0  -1    3.20    1.30
  -5   0  -1   46.00    4.60
  -5   0  -1   40.80    3.10
   5   0   1   40.90    4.10
  -5   0  -1   45.30    3.90
  -5   0  -1   42.30    3.90
   5   0   1   38.90    4.20
   5   0   1   41.40    4.20
   5   0   1   45.20    5.40
  -5   0  -1   50.39    8.70
   5   0   1   45.90    4.90
  -6   0  -1   12.60    2.50
   6   0   1   14.50    3.00
  -6   0  -1   16.60    2.10
   6   0   1   17.10    3.20
   6   0   1   22.00    4.30
  -6   0  -1   15.30    2.60
   7   0   1   20.70    2.50
   7   0   1   14.20    3.50
  -7   0  -1   17.80    2.10
   7   0   1   11.90    2.90
  -7   0  -1   17.40    1.80
   7   0   1   15.90    3.00
   8  -1  -1    5.70    1.20
   8   1  -1    5.80    1.60
   8   1  -1    7.40    1.40
  -7  -1   1   94.69    5.70
  -7  -1   1   99.79    4.60
   7  -1  -1   97.49    6.60
   7  -1  -1  102.29    9.00
  -7  -1   1   98.89    5.40
   7  -1  -1  108.19    6.20
   7   1  -1  102.49    5.80
  -7   1   1   92.49    5.50
   7   1  -1   86.19    6.70
  -7   1   1   98.19    5.00
   7   1  -1   92.69    6.00
   7   1  -1   88.39    6.40
  -7   1   1   98.19    4.40
   6  -1  -1   45.80    4.80
   6  -1  -1   48.20    4.40
   6  -1  -1   57.29    5.00
   6  -1  -1   58.39    5.60
  -6  -1   1   60.89    3.90
  -6  -1   1   61.09    5.30
  -6  -1   1   54.99    4.10
  -6  -1   1   51.39    4.30
  -6   1   1   55.39    5.40
  -6   1   1   50.99    4.60
   6   1  -1   48.10    5.50
   6   1  -1   54.19    4.60
   6   1  -1   53.89    4.80
  -6   1   1   56.29    4.30
   6   1  -1   55.39    4.90
  -6   1   1   55.39    4.30
  -6   1   1   53.99    3.70
   6   1  -1   58.49    5.90
  -5  -1   1  625.94   22.50
  -5  -1   1  627.54   21.30
  -5  -1   1  616.94   20.60
  -5  -1   1  659.53   22.00
   5  -1  -1  601.84   21.70
  -5  -1   1  675.23   30.20
   5   1  -1  636.04   23.80
   5   1  -1  627.44   22.40
  -5   1   1  549.15   35.40
   5   1  -1  652.83   22.20
   5   1  -1  661.03   24.50
   5   1  -1  646.14   22.80
  -5   1   1  616.74   21.50
  -5   1   1  638.74   22.50
  -5   1   1  670.43   22.10
   5   1  -1  636.34   22.40
  -5   1   1  631.34   20.50
  -5   1   1  623.94   24.20
  -4  -1   1  222.18   13.10
  -4  -1   1  211.78    9.10
  -4  -1   1  209.08    8.80
  -4   1   1  210.48    8.70
  -4   1   1  209.68   10.40
  -4   1   1  207.58    9.10
  -4   1   1  207.68   13.30
  -3  -1   1 3383.56  117.39
  -3  -1   1 3058.69   98.99
  -3  -1   1 3341.17   95.09
  -3   1   1 3291.67   95.19
  -3   1   1 3302.57  100.39
   2  -1  -1 1201.38   45.20
  -2   1   1 1182.28   38.80
  -2   1   1 1204.68   49.60
   0  -1  -1 4354.06  125.39
   0  -1  -1 4440.06  125.29
   0  -1   1 4239.88  123.69
   0   1  -1 4257.77  124.59
  -2  -1  -1 1677.63   52.69
  -2   1  -1 1763.32   53.99
  -3  -1  -1 2443.56   77.89
  -3  -1  -1 2592.94   73.59
  -3   1  -1 2495.35   73.69
  -3   1  -1 2423.76   74.99
  -3   1  -1 2599.24   79.39
  -4  -1  -1  590.54   26.00
  -4  -1  -1  598.34   20.50
  -4  -1  -1  606.64   20.10
  -4   1  -1  607.34   27.20
  -4   1  -1  617.04   20.30
  -4   1  -1  592.34   22.10
  -4   1  -1  585.24   20.50
   5  -1   1  430.26   18.20
  -5  -1  -1  458.35   23.90
  -5  -1  -1  433.36   15.30
  -5  -1  -1  460.45   16.70
  -5  -1  -1  454.45   17.20
  -5   1  -1  453.65   18.60
   5   1   1  440.66   17.80
  -5   1  -1  454.75   17.10
   5   1   1  457.85   17.60
  -5   1  -1  449.46   16.50
  -5   1  -1  446.36   15.30
  -5   1  -1  443.96   24.60
   5   1   1  440.76   17.80
   5   1   1  457.35   19.10
   5   1   1  456.25   19.30
   6  -1   1 1242.38   41.30
  -6  -1  -1 1199.68   38.00
  -6  -1  -1 1249.18   39.00
   6  -1   1 1200.78   39.10
   6  -1   1 1139.49   38.80
  -6  -1  -1 1181.78   36.40
   6   1   1 1189.68   41.30
   6   1   1 1208.28   41.90
  -6   1  -1 1193.88   38.50
  -6   1  -1 1201.28   36.40
  -6   1  -1 1211.98   37.90
  -6   1  -1 1187.88   40.60
   6   1   1 1163.28   39.20
   6   1   1 1169.68   39.20
  -7  -1  -1  161.28    7.40
   7  -1   1  161.08    8.00
   7  -1   1  147.59    7.20
   7  -1   1  136.19    9.10
  -7  -1  -1  158.78    6.80
   7  -1   1  156.38    8.10
  -7  -1  -1  155.78    6.90
  -7   1  -1  159.28    6.60
   7   1   1  161.38    9.20
   7   1   1  163.88    7.40
   8  -2  -1   51.89    2.90
   8   2  -1   42.70    3.60
   8   2  -1   48.50    2.90
   7  -2  -1  239.28   10.70
  -7  -2   1  234.88    9.60
  -7  -2   1  233.28   10.10
   7  -2  -1  251.97   10.50
  -7  -2   1  253.77    8.80
   7   2  -1  236.68   10.60
   7   2  -1  225.48   11.50
  -7   2   1  218.78    8.70
   7   2  -1  236.58   12.00
  -7   2   1  237.18   11.30
  -7   2   1  242.38    8.10
   7   2  -1  242.88   10.30
  -6  -2   1   96.49    6.10
  -6  -2   1   86.69    4.70
   6  -2  -1   83.79    6.50
   6  -2  -1   86.89    6.30
  -6  -2   1   82.79    5.00
   6  -2  -1   78.79    5.50
   6  -2  -1   81.49    5.50
  -6  -2   1   87.59    5.60
  -6   2   1   94.79    4.60
   6   2  -1   87.39    5.80
   6   2  -1   84.69    7.50
  -6   2   1   90.09    5.30
  -6   2   1   87.49    6.00
  -6   2   1   83.19    5.70
   6   2  -1   88.29    6.50
   6   2  -1   87.79    7.40
   6   2  -1   93.09    6.60
  -6   2   1   92.19    6.90
  -5  -2   1  116.49    6.80
  -5  -2   1  111.09   10.00
  -5  -2   1  120.49    5.60
  -5  -2   1  120.39    6.50
   5  -2  -1  103.39    6.10
  -5  -2   1  108.29    5.90
   5   2  -1  115.79    7.10
   5   2  -1  120.79    7.40
   5   2  -1  132.09   12.40
   5   2  -1  121.39    8.50
   5   2  -1  116.39    8.20
  -5   2   1  113.59    6.20
  -5   2   1  101.49    6.90
  -5   2   1  110.29    6.20
  -5   2   1  121.29   14.60
   5   2  -1  125.29    7.00
  -5   2   1  113.79    7.90
  -5   2   1  119.39    6.70
  -5   2   1  102.99    5.30
   5   2  -1  123.89    6.80
  -4  -2   1 1867.01   56.39
  -4  -2   1 1874.91   56.69
  -4  -2   1 1849.52   83.59
  -4  -2   1 1948.41   62.79
  -4   2   1 1828.92   56.89
  -4   2   1 1889.21   70.09
  -4   2   1 1839.22   56.29
  -4   2   1 1943.31   59.09
   3  -2  -1 3544.45  104.79
  -3  -2   1 3471.45  124.79
  -3  -2   1 3535.65  103.69
  -3  -2   1 3502.05  107.69
  -3   2   1 3659.13  107.59
  -3   2   1 3685.13  110.09
  -3   2   1 3711.73  104.19
   2  -2  -1 2670.13   92.99
  -2   2   1 2998.60   85.89
  -1   2   1 7515.55  215.28
   0   2   1 7877.11  224.18
   0   2   1 7812.62  227.28
   0   2  -1 7519.25  219.78
   1   2   1 8586.24  247.68
  -1   2  -1 8206.18  239.68
  -2  -2  -1 1908.71   59.59
  -2  -2  -1 2073.39   67.59
   2   2   1 2010.90   68.09
  -2   2  -1 1947.31   61.99
  -3  -2  -1 6129.89  178.18
   3  -2   1 5917.41  175.18
  -3  -2  -1 6022.20  173.68
  -3   2  -1 5977.00  180.58
  -3   2  -1 6159.28  174.08
  -3   2  -1 6118.99  173.98
  -3   2  -1 6150.38  175.78
  -4  -2  -1  237.68    9.70
  -4  -2  -1  221.98    9.20
  -4  -2  -1  232.18   13.60
  -4   2  -1  227.58    9.70
   4   2   1  241.38   10.50
  -4   2  -1  219.68    9.30
  -4   2  -1  240.48   15.10
   4   2   1  235.08   11.60
  -4   2  -1  235.18   11.30
  -4   2  -1  215.08    8.40
   4   2   1  238.78   10.10
  -5  -2  -1  427.46   14.70
  -5  -2  -1  413.86   22.00
   5  -2   1  419.46   17.30
   5  -2   1  399.06   15.80
  -5  -2  -1  442.76   15.90
  -5  -2  -1  439.36   16.50
   5   2   1  433.66   17.10
  -5   2  -1  431.66   15.70
   5   2   1  417.96   18.70
  -5   2  -1  423.56   16.40
   5   2   1  418.96   17.30
  -5   2  -1  425.76   14.50
  -5   2  -1  410.36   24.20
  -5   2  -1  419.06   16.70
  -5   2  -1  432.56   18.10
   5   2   1  428.26   19.10
   5   2   1  425.86   17.30
   6  -2   1  158.38    8.80
   6  -2   1  157.08   11.30
  -6  -2  -1  172.58    8.30
   6  -2   1  168.78    9.30
  -6  -2  -1  178.58    8.80
  -6   2  -1  170.18    7.10
  -6   2  -1  179.68    8.00
   6   2   1  182.38   12.20
   6   2   1  163.68   11.90
  -6   2  -1  176.18    9.90
  -6   2  -1  163.58    8.40
   6   2   1  170.48    9.20
   6   2   1  171.58   10.20
   6   2   1  153.78   11.90
   6   2   1  178.58   13.20
  -6   2  -1  170.78    8.40
   7  -2   1   51.79    3.80
  -7  -2  -1   55.39    2.90
  -7  -2  -1   49.30    3.40
   7  -2   1   49.70    3.60
  -7  -2  -1   52.99    3.80
   7  -2   1   42.30    4.70
   7   2   1   41.80    3.50
   7   2   1   48.20    4.00
  -7   2  -1   51.09    2.40
   7   2   1   56.39    5.00
  -7  -3   1   79.99    4.50
  -7  -3   1   73.89    4.60
  -7  -3   1   71.99    4.40
   7  -3  -1   78.09    5.10
   7  -3  -1   75.79    5.00
  -7   3   1   63.79    5.00
   7   3  -1   76.39    5.50
  -7   3   1   75.79    4.60
   7   3  -1   79.39    5.70
   7   3  -1   73.39    5.90
   7   3  -1   73.79    6.50
   6  -3  -1   49.00    4.30
   6  -3  -1   48.00    5.20
  -6  -3   1   59.39    4.60
  -6  -3   1   50.29    3.40
  -6  -3   1   50.39    4.10
   6   3  -1   50.49    4.20
   6   3  -1   49.90    5.90
  -6   3   1   52.49    3.70
  -6   3   1   50.59    5.70
  -6   3   1   40.80    6.40
  -6   3   1   50.39    3.10
   6   3  -1   50.49    5.20
   6   3  -1   49.30    6.30
   6   3  -1   49.80    4.80
  -6   3   1   54.39    5.80
   6   3  -1   44.90    6.90
  -5  -3   1    2.20    1.40
  -5  -3   1    3.20    1.30
   5  -3  -1    3.20    1.70
  -5  -3   1    1.40    1.10
  -5  -3   1    0.10    1.40
  -5  -3   1    0.50    1.30
   5   3  -1    3.10    2.30
  -5   3   1    1.90    1.40
   5   3  -1    9.70    3.50
  -5   3   1    4.20    2.10
  -5   3   1    0.80    1.60
  -5   3   1    2.30    1.40
  -5   3   1    1.70    1.00
   5   3  -1    5.60    4.50
  -5   3   1    3.90    1.50
   5   3  -1    1.20    2.00
   5   3  -1    2.30    1.50
  -5   3   1    2.50    4.10
   5   3  -1    0.70    1.60
   5   3  -1    4.70    1.90
   4  -3  -1 1481.85   45.90
  -4  -3   1 1484.95   45.10
   4  -3  -1 1466.15   46.50
  -4  -3   1 1371.56   70.79
  -4  -3   1 1457.75   49.99
  -4  -3   1 1441.36   44.70
  -4   3   1 1479.85   47.60
   4   3  -1 1532.65   47.80
  -4   3   1 1418.36   53.49
   4   3  -1 1520.45   49.30
  -4   3   1 1466.85   45.30
  -4   3   1 1391.76   44.70
   4   3  -1 1479.35   45.40
   4   3  -1 1571.14   47.30
   4   3  -1 1467.95   46.40
   3  -3  -1 2329.47   63.19
  -3  -3   1 2070.79   60.79
  -3  -3   1 1917.71   80.49
  -3  -3   1 2071.99   64.39
   3  -3  -1 2032.80   62.39
  -3   3   1 2048.99   63.09
  -3   3   1 2034.30   61.19
  -3   3   1 2036.50   67.39
   1  -3  -1 3760.72  104.39
  -1   3   1 3692.53  101.19
   1   3  -1 3142.49  110.29
   0  -3   1 1732.53   51.29
   0  -3  -1 1746.93   50.79
   0  -3  -1 1591.24   50.59
   0  -3   1 1720.93   54.29
   0   3  -1 1775.92   57.79
   0   3   1 1777.92   56.79
   0   3   1 1673.93   59.79
  -1  -3  -1  444.56   12.30
  -1   3  -1  387.86   14.90
   1   3   1  386.16   21.10
  -1   3  -1  352.06   18.40
  -2  -3  -1 2481.35   82.09
   2  -3   1 2558.34   74.39
  -2  -3  -1 2526.95   74.19
  -2   3  -1 2511.65   75.89
  -2   3  -1 2411.06   77.39
  -2   3  -1 2576.54   74.49
   2   3   1 2553.14   86.19
   3  -3   1  178.18    8.50
  -3  -3  -1  176.38    9.30
  -3  -3  -1  166.98    6.70
   3  -3   1  157.68    8.00
  -3   3  -1  161.78    7.10
  -3   3  -1  175.48    8.50
   3   3   1  172.38   14.10
  -3   3  -1  154.28    6.70
  -3   3  -1  155.98   10.70
  -4  -3  -1 1303.77   46.10
  -4  -3  -1 1298.37   40.30
   4  -3   1 1280.87   41.50
   4  -3   1 1450.95   41.70
   4  -3   1 1288.57   41.20
  -4  -3  -1 1359.86   40.70
   4   3   1 1280.17   42.30
  -4   3  -1 1244.18   41.70
  -4   3  -1 1323.57   50.19
   4   3   1 1334.57   44.90
   4   3   1 1353.86   51.49
  -4   3  -1 1368.16   43.40
   4   3   1 1304.47   42.30
   4   3   1 1322.77   42.90
  -4   3  -1 1304.77   40.90
  -4   3  -1 1266.27   39.20
   4   3   1 1284.77   42.00
  -4   3  -1 1296.47   49.60
  -4   3  -1 1332.07   40.30
  -5  -3  -1  749.13   24.60
   5  -3   1  731.53   26.80
  -5  -3  -1  791.62   25.70
  -5  -3  -1  772.92   26.10
  -5  -3  -1  751.52   32.20
   5  -3   1  761.72   26.50
   5   3   1  780.22   26.40
  -5   3  -1  762.12   23.90
   5   3   1  795.62   28.00
   5   3   1  780.92   27.60
  -5   3  -1  742.93   37.00
   5   3   1  764.42   39.90
   5   3   1  792.32   29.70
  -5   3  -1  740.23   28.30
   5   3   1  806.22   27.80
   5   3   1  743.63   30.60
  -5   3  -1  775.92   25.30
  -5   3  -1  782.72   26.00
   6  -3   1   57.59    4.70
  -6  -3  -1   58.39    4.40
  -6  -3  -1   59.39    4.20
   6  -3   1   54.99    4.10
  -6  -3  -1   60.19    3.70
  -6   3  -1   60.29    3.20
  -6   3  -1   56.59    4.40
  -6   3  -1   64.49    4.90
   6   3   1   57.89    6.50
   6   3   1   57.99    6.30
   6   3   1   52.29    4.90
   6   3   1   62.59    5.10
   6   3   1   61.89    5.70
   6   3   1   60.89    6.10
  -6   3  -1   66.39    5.60
  -7  -3  -1    5.00    1.00
   7  -3   1    6.40    1.60
   7  -3   1    5.20    1.50
  -7  -3  -1    5.50    1.40
  -7  -3  -1    5.50    1.50
  -7   3  -1    6.50    1.40
   7   3   1    7.20    2.60
   7   3   1    4.40    1.30
   7   3   1    6.70    1.90
  -7  -4   1   42.60    2.50
   7  -4  -1   44.60    3.40
  -7   4   1   38.60    3.60
   7   4  -1   43.90    4.40
   7   4  -1   41.50    4.80
   7   4  -1   40.70    3.50
  -7   4   1   37.70    3.10
   7   4  -1   43.40    3.90
  -6  -4   1  102.39    5.80
  -6  -4   1   99.89    6.00
   6  -4  -1   93.89    6.20
   6  -4  -1   97.29    6.00
  -6  -4   1   94.69    4.70
  -6   4   1   92.49    6.10
   6   4  -1   90.19    6.50
   6   4  -1   96.09    8.00
   6   4  -1   97.49    7.10
   6   4  -1   97.99    5.90
  -6   4   1   98.69    7.00
   6   4  -1   89.59    5.80
   6   4  -1   98.39    8.30
  -6   4   1   94.89    3.80
   5  -4  -1  145.69    7.10
  -5  -4   1  146.19    7.20
  -5  -4   1  139.39    7.40
  -5  -4   1  151.08   11.00
   5  -4  -1  144.39    7.70
   5   4  -1  151.08    8.90
   5   4  -1  155.48   10.50
  -5   4   1  138.79    6.60
  -5   4   1  137.89    8.40
  -5   4   1  132.79    8.90
   5   4  -1  146.79   10.00
   5   4  -1  139.09    8.40
   5   4  -1  146.59    7.90
   5   4  -1  156.48   14.20
  -4  -4   1  517.15   18.20
  -4  -4   1  561.34   38.90
   4  -4  -1  597.64   23.30
   4  -4  -1  510.15   20.10
  -4  -4   1  560.24   22.60
  -4  -4   1  561.64   18.60
   4  -4  -1  521.35   19.80
  -4   4   1  515.45   17.70
   4   4  -1  553.24   19.80
  -4   4   1  510.85   16.80
  -4   4   1  523.15   20.90
   4   4  -1  503.15   19.40
   4   4  -1  458.05   23.90
  -4   4   1  587.64   27.30
   4   4  -1  556.14   19.20
  -4   4   1  497.25   19.70
   4   4  -1  569.84   24.00
   4   4  -1  587.04   28.00
  -3  -4   1  645.04   20.80
  -3  -4   1  678.43   23.90
   3  -4  -1  678.73   22.50
   3  -4  -1  665.33   23.00
  -3   4   1  658.93   23.40
  -3   4   1  649.24   27.20
   2  -4  -1 4437.06  143.69
   2  -4  -1 4466.55  127.59
  -2   4   1 4424.26  131.29
   2   4  -1 4318.37  143.99
  -2   4   1 4407.66  128.19
  -1  -4   1  690.83   20.70
   1  -4  -1  628.24   23.20
   1  -4  -1  621.14   20.40
   1   4  -1  726.53   34.50
   0  -4  -1 5282.67  155.78
   0  -4   1 5706.83  161.58
   0  -4   1 5289.47  156.48
   0  -4   1 5500.55  154.18
   0   4   1 5466.75  164.58
   0   4  -1 5299.07  165.68
   0   4   1 5297.67  164.88
   1  -4   1 6448.55  189.68
   1  -4   1 6484.05  200.18
  -1  -4  -1 6831.02  186.78
  -1   4  -1 6563.14  199.58
   1   4   1 6661.43  197.48
   1   4   1 6403.76  201.88
   1   4   1 6637.24  203.08
   2  -4   1 1347.77   41.50
  -2  -4  -1 1285.77   40.30
   2   4   1 1352.26   54.19
  -2   4  -1 1309.07   44.80
  -2   4  -1 1383.66   41.50
  -3  -4  -1  298.27   10.70
  -3  -4  -1  306.77   20.30
  -3  -4  -1  323.67   13.60
   3  -4   1  303.77   13.20
   3  -4   1  328.57   13.10
  -3   4  -1  343.87   14.00
  -3   4  -1  311.07   16.80
  -3   4  -1  299.87   14.50
  -4  -4  -1  858.31   27.60
  -4  -4  -1  907.81   32.70
  -4  -4  -1  867.31   27.90
   4  -4   1  851.41   30.30
   4  -4   1  847.22   28.20
   4  -4   1  868.71   28.90
   4   4   1  886.91   32.90
  -4   4  -1  896.61   37.90
  -4   4  -1  825.22   26.30
   4   4   1  898.91   30.10
  -4   4  -1  885.71   43.40
  -4   4  -1  854.41   29.30
   4   4   1  833.42   29.80
  -4   4  -1  906.61   31.60
  -4   4  -1  883.61   30.80
  -4   4  -1  865.71   27.50
   4   4   1  898.81   30.20
   4   4   1  869.51   41.50
   4   4   1  888.91   29.00
   4   4   1  862.61   31.90
   4   4   1  851.31   30.00
  -5  -4  -1  423.26   16.00
  -5  -4  -1  434.46   15.70
  -5  -4  -1  391.26   14.10
   5  -4   1  403.36   16.10
  -5  -4  -1  411.56   20.50
   5   4   1  429.06   20.00
   5   4   1  416.76   17.10
   5   4   1  406.96   17.20
  -5   4  -1  403.16   13.30
   5   4   1  420.86   19.50
   5   4   1  424.36   17.70
   5   4   1  423.06   16.10
  -5   4  -1  400.26   17.90
  -5   4  -1  383.16   16.10
   5   4   1  408.26   21.60
   5   4   1  409.66   16.50
  -6  -4  -1   43.00    3.70
   6  -4   1   45.20    3.80
  -6  -4  -1   43.50    3.60
  -6  -4  -1   42.20    2.90
   6   4   1   42.80    5.80
   6   4   1   41.70    4.30
   6   4   1   43.60    4.20
  -6   4  -1   40.20    2.00
   6   4   1   45.10    5.80
   6   4   1   43.80    5.20
  -6   4  -1   36.70    4.20
  -6   4  -1   44.20    3.90
   6   4   1   40.20    5.90
   7  -4   1   42.40    2.90
  -7  -4  -1   49.99    3.00
  -7  -4  -1   52.69    2.60
   7  -4   1   50.09    3.20
  -7   4  -1   45.80    3.00
   7   4   1   53.99    4.60
   7   4   1   44.50    3.00
  -7  -5   1   53.39    3.20
   7  -5  -1   60.09    3.70
   7   5  -1   48.90    4.60
   7   5  -1   57.09    5.00
  -7   5   1   69.49    4.30
  -7   5   1   52.79    4.10
   7   5  -1   58.39    4.30
  -6  -5   1  103.89    5.60
  -6  -5   1  109.49    5.00
   6  -5  -1  117.19    6.40
  -6  -5   1  109.69    6.00
  -6   5   1  104.09    7.20
   6   5  -1  101.69    6.00
   6   5  -1  108.09    7.40
   6   5  -1  102.99    8.60
  -6   5   1  105.39    6.40
   6   5  -1  110.69    8.30
   6   5  -1  106.89    6.20
   6   5  -1  110.79    7.00
   5  -5  -1  379.06   15.10
   5  -5  -1  359.96   14.00
  -5  -5   1  367.26   14.00
  -5  -5   1  387.86   14.60
  -5  -5   1  364.86   18.20
   5   5  -1  384.56   16.50
   5   5  -1  386.36   15.60
  -5   5   1  386.36   17.10
   5   5  -1  394.36   18.30
   5   5  -1  400.76   19.40
   5   5  -1  379.66   15.20
   5   5  -1  378.26   23.80
   5   5  -1  396.66   16.40
  -5   5   1  378.66   15.80
  -4  -5   1   -3.20   11.90
   4  -5  -1   20.50    3.10
  -4  -5   1   18.00    2.10
   4  -5  -1   16.00    3.40
   4  -5  -1   16.40    2.70
   4  -5  -1   12.80    3.00
   4   5  -1   21.90    4.80
   4   5  -1   21.60    3.40
   4   5  -1   17.50    3.20
   4   5  -1   15.90    2.70
   4   5  -1   21.80    4.60
   4   5  -1   21.30    3.90
   4   5  -1   22.50    3.40
  -4   5   1   20.20    3.00
  -4   5   1   21.80    4.00
   4   5  -1   23.30    6.80
  -3  -5   1 1902.81   57.79
   3  -5  -1 2006.30   60.99
   3  -5  -1 1963.30   60.19
  -3  -5   1 1990.70   60.49
  -3   5   1 2018.40   61.29
   2  -5  -1  526.35   17.90
   2  -5  -1  518.25   30.60
   2   5  -1  514.25   31.80
  -2   5   1  527.55   18.40
  -1  -5   1 1673.53   49.60
   1  -5  -1 1625.24   61.69
   1  -5  -1 1635.84   49.00
  -1   5   1 1624.24   49.30
  -1   5   1 1637.74   59.39
   1   5  -1 1750.52   67.29
   0  -5   1 3622.24  114.39
   0  -5   1 3640.24  107.19
   0  -5   1 3650.83  108.49
   0   5  -1 3555.24  119.89
   0   5   1 3769.52  119.09
   0   5   1 3673.53  118.89
   1  -5   1 4883.51  163.98
  -1  -5  -1 5476.25  153.88
   1  -5   1 5221.88  150.28
  -1   5  -1 5228.08  164.68
   1   5   1 5282.27  167.48
  -2  -5  -1 3935.81  111.99
   2  -5   1 3812.42  114.29
  -2   5  -1 3895.91  113.89
  -2   5  -1 3934.41  129.49
   3  -5   1 1310.57   42.60
   3  -5   1 1350.26   41.30
   3  -5   1 1274.87   41.90
   3  -5   1 1263.57   40.40
  -3  -5  -1 1265.17   38.60
  -3  -5  -1 1369.56   41.50
   3   5   1 1256.67   41.90
   3   5   1 1356.96   45.40
  -3   5  -1 1237.18   55.39
   3   5   1 1343.77   42.50
   3   5   1 1351.86   50.99
   3   5   1 1307.57   44.70
  -3   5  -1 1342.67   42.20
  -3   5  -1 1237.58   40.90
   3   5   1 1293.37   42.00
   4  -5   1 1629.14   50.79
   4  -5   1 1634.94   52.69
   4  -5   1 1639.94   51.59
  -4  -5  -1 1724.33   54.49
  -4  -5  -1 1648.44   49.99
  -4  -5  -1 1467.65   51.49
   4  -5   1 1652.63   53.59
   4   5   1 1654.43   55.39
  -4   5  -1 1742.43   54.99
   4   5   1 1663.23   52.99
   4   5   1 1657.33   52.89
   4   5   1 1670.83   50.49
   4   5   1 1645.94   56.59
   4   5   1 1629.74   52.99
   4   5   1 1705.63   53.29
   4   5   1 1753.42   60.39
  -4   5  -1 1616.34   51.69
  -4   5  -1 1709.03   78.89
   4   5   1 1665.63   51.39
   5  -5   1  167.88    7.40
  -5  -5  -1  165.68    7.70
   5  -5   1  182.18    9.20
   5   5   1  166.18    9.50
  -5   5  -1  157.08    9.60
   5   5   1  177.98   12.50
   5   5   1  175.58   11.80
   5   5   1  170.28    8.60
  -5   5  -1  164.08    8.70
   5   5   1  177.18   10.20
   5   5   1  168.88    9.70
   5   5   1  167.48   11.50
   6  -5   1   15.00    2.60
  -6  -5  -1   18.10    2.20
  -6  -5  -1   22.10    2.40
   6   5   1   12.90    3.60
   6   5   1   19.00    3.30
  -6   5  -1   10.40    2.50
  -6   5  -1   18.00    2.60
   6   5   1   19.90    3.20
   6   5   1   11.00    3.10
   6   5   1   17.20    3.60
  -7  -5  -1    8.40    1.30
   7  -5   1    9.70    1.40
  -7  -5  -1   11.10    1.10
   7  -5   1    8.20    1.30
  -7   5  -1   10.40    1.40
   7   5   1    9.90    2.20
  -7  -6   1   63.29    2.60
   7  -6  -1   66.29    3.60
   7   6  -1   63.89    4.80
   7   6  -1   55.39    4.50
  -6  -6   1   13.90    2.30
  -6  -6   1   15.20    2.30
   6  -6  -1   11.80    2.30
  -6  -6   1   15.20    1.80
   6   6  -1   14.00    3.40
   6   6  -1   11.90    2.30
  -6   6   1   13.70    2.90
   6   6  -1   10.60    3.40
   6   6  -1   20.10    4.40
  -6   6   1   12.40    2.30
   5  -6  -1  189.78    8.90
   5  -6  -1  188.58    9.90
   5  -6  -1  201.08    9.60
  -5  -6   1  188.48    8.30
  -5  -6   1  204.38    8.80
   5   6  -1  199.88   16.50
   5   6  -1  192.58   12.80
   5   6  -1  196.98    9.80
  -5   6   1  187.18    9.60
   5   6  -1  193.78   10.50
   5   6  -1  192.18   10.20
  -5   6   1  195.68   10.80
   5   6  -1  192.68    9.40
   5   6  -1  194.08   12.00
   4  -6  -1  787.42   29.00
  -4  -6   1  784.62   27.70
   4  -6  -1  822.62   28.50
  -4  -6   1  789.72   25.60
   4  -6  -1  784.22   26.80
   4  -6  -1  780.12   26.50
   4   6  -1  792.62   28.30
   4   6  -1  821.22   32.30
  -4   6   1  794.22   27.80
   4   6  -1  787.32   30.30
   4   6  -1  814.52   28.30
   4   6  -1  778.72   27.80
   4   6  -1  785.22   26.60
  -4   6   1  821.32   29.10
   4   6  -1  810.72   27.10
   4   6  -1  830.42   37.20
   3  -6  -1  128.19    7.30
   3  -6  -1   98.19    7.40
  -3  -6   1  128.39    6.10
   3  -6  -1  124.49    7.50
   3   6  -1  120.39    7.40
   3   6  -1  124.59    6.50
   3   6  -1  112.09    8.30
  -3   6   1  133.29    7.20
   3   6  -1  139.49   10.40
  -3   6   1  127.79    7.50
   3   6  -1  113.49   12.60
   3   6  -1  118.79    7.10
   3   6  -1  132.99    7.40
  -2  -6   1  290.97   10.20
   2  -6  -1  288.87   11.70
   2  -6  -1  277.37   22.80
   2   6  -1  277.87   24.00
   1  -6  -1 2405.86   87.29
  -1  -6   1 2340.37   71.99
  -1  -6   1 2791.72   88.29
  -1   6   1 2371.36   70.59
  -1   6   1 2342.07   88.79
   1   6  -1 2183.98   88.99
  -1   6   1 2477.55   85.09
   0  -6   1 1723.63   62.69
   0  -6   1 1666.33   51.39
   0  -6  -1 1706.63   50.79
   0  -6  -1 1707.83   54.89
   0   6  -1 1725.93   69.39
   0   6   1 1776.02   67.89
   0   6   1 1748.53   67.99
   0   6  -1 2008.40   89.89
   1  -6   1 1687.63   53.59
  -1  -6  -1 1824.12   56.69
   1  -6   1 1803.52   53.99
   1  -6   1 1772.82   69.49
   1   6   1 1698.33   94.59
  -1   6  -1 1845.22   53.29
  -1   6  -1 1820.12   70.59
   2  -6   1   83.69    5.60
   2  -6   1   94.29    6.00
  -2   6  -1   96.59    5.60
  -2   6  -1   81.99   11.00
   3  -6   1  170.18    8.20
   3  -6   1  170.88    9.60
   3  -6   1  177.38    9.50
  -3  -6  -1  178.18    7.50
   3  -6   1  161.58    8.20
   3   6   1  168.18    9.30
   3   6   1  180.08   10.70
   3   6   1  185.68   11.60
   3   6   1  180.28   14.20
   3   6   1  187.98   14.80
   3   6   1  173.28    9.20
   3   6   1  153.68    9.10
   3   6   1  150.88    7.40
   3   6   1  174.58    8.00
  -3   6  -1  160.88   16.70
   3   6   1  177.98    8.80
  -3   6  -1  156.48    8.10
  -3   6  -1  175.88    9.20
   4  -6   1  339.37   15.00
   4  -6   1  323.47   13.40
   4  -6   1  322.17   13.90
   4  -6   1  315.77   15.20
  -4  -6  -1  338.87   12.00
   4   6   1  332.97   14.80
  -4   6  -1  333.37   13.80
  -4   6  -1  323.77   14.80
   4   6   1  325.57   14.70
   4   6   1  357.96   18.10
   4   6   1  322.57   17.00
  -4   6  -1  313.67   25.20
   4   6   1  337.97   15.30
   4   6   1  320.37   21.70
   4   6   1  339.17   13.50
  -5  -6  -1   45.90    3.60
   5  -6   1   45.60    4.20
  -5  -6  -1   47.70    3.60
   5  -6   1   50.29    4.70
   5   6   1   49.30    6.20
   5   6   1   47.40    6.40
   5   6   1   50.59    6.40
  -5   6  -1   47.50    4.70
   5   6   1   49.30    4.70
   5   6   1   49.60    4.30
   5   6   1   55.19    6.00
  -5   6  -1   41.10    4.10
  -6  -6  -1   87.99    4.00
  -6  -6  -1   86.19    4.60
   6  -6   1   82.69    5.60
   6   6   1   91.39    6.40
   6   6   1   97.99    7.40
  -6   6  -1   91.79    5.80
   6   6   1   83.39    5.40
  -6   6  -1   94.39    5.40
  -7   6  -1   48.60    2.50
   7   6   1   45.30    4.00
   7  -7  -1   50.39    2.80
  -7   7   1   47.20    2.40
   6  -7  -1   15.20    2.40
  -6  -7   1   10.80    1.80
   6   7  -1   13.90    3.40
   6   7  -1   15.50    2.80
  -6   7   1    9.00    2.10
  -6   7   1   16.60    2.50
  -5  -7   1  312.17   11.80
   5  -7  -1  317.57   12.50
   5  -7  -1  320.77   13.20
  -5  -7   1  316.57   11.90
   5   7  -1  301.07   16.80
   5   7  -1  321.07   15.80
  -5   7   1  326.57   13.30
  -5   7   1  311.57   14.10
   5   7  -1  324.27   14.50
   5   7  -1  308.77   12.90
   4  -7  -1  712.73   24.80
  -4  -7   1  742.23   23.60
   4  -7  -1  714.13   27.30
   4  -7  -1  723.63   26.70
   4  -7  -1  708.33   25.10
  -4   7   1  770.82   25.80
   4   7  -1  744.03   30.80
   4   7  -1  720.33   35.10
  -4   7   1  704.83   44.30
   4   7  -1  724.33   26.50
   4   7  -1  751.62   25.30
   4   7  -1  737.33   24.80
  -4   7   1  731.33   26.50
   4   7  -1  705.23   28.50
   3  -7  -1  699.53   24.90
   3  -7  -1  688.93   23.70
   3  -7  -1  704.83   25.80
  -3   7   1  718.63   24.30
  -3   7   1  689.23   25.00
   3   7  -1  644.34   25.00
  -3   7   1  722.33   24.70
   3   7  -1  720.43   32.40
   3   7  -1  656.53   26.40
   3   7  -1  715.43   23.90
   3   7  -1  683.03   23.60
   3   7  -1  689.73   24.90
   3   7  -1  689.73   28.70
  -3   7   1  711.73   43.20
   2  -7  -1  517.35   18.40
   2  -7  -1  484.35   34.40
   2  -7  -1  487.05   18.50
  -2   7   1  497.55   19.40
   2   7  -1  477.35   17.00
   2   7  -1  498.85   21.70
   2   7  -1  485.85   17.60
   2   7  -1  478.85   19.10
   2   7  -1  504.45   35.80
  -2   7   1  467.35   28.10
  -2   7   1  474.45   17.30
  -2   7   1  509.15   33.90
  -2   7   1  503.15   17.50
   2   7  -1  497.35   23.70
   1  -7  -1  220.48   20.10
  -1  -7   1  270.97    9.70
   1  -7  -1  288.27   11.20
  -1  -7   1  308.57   16.80
   1  -7  -1  283.87   11.00
  -1   7   1  301.17   10.00
   1   7  -1  269.67   24.00
  -1   7   1  301.77   21.80
  -1   7   1  299.27   23.70
   0  -7   1 1194.18   49.90
   0  -7  -1 1166.38   39.50
   0  -7   1 1169.38   36.20
   0   7  -1 1154.18   55.39
   0   7   1 1207.28   53.89
   0   7   1 1144.99   54.79
   1  -7   1  607.14   20.90
   1  -7   1  589.94   20.40
  -1   7  -1  594.44   19.10
  -1   7  -1  556.44   35.30
   2  -7   1  570.44   20.90
   2  -7   1  568.94   20.60
   2  -7   1  599.24   22.70
   2  -7   1  596.84   22.10
  -2   7  -1  609.54   22.80
   2   7   1  638.04   22.40
  -2   7  -1  633.74   21.40
   2   7   1  639.34   28.30
   2   7   1  654.23   21.30
   2   7   1  644.24   26.60
   2   7   1  629.94   20.80
  -2   7  -1  630.84   37.90
   2   7   1  577.14   24.20
  -2   7  -1  602.84   20.70
   2   7   1  615.04   23.00
   2   7   1  632.04   29.30
   2   7   1  596.44   22.40
   3  -7   1 1609.94   50.99
   3  -7   1 1575.24   48.80
   3  -7   1 1570.64   51.49
   3  -7   1 1620.54   49.30
  -3   7  -1 1541.35   70.49
   3   7   1 1575.64   48.60
  -3   7  -1 1582.44   49.80
   3   7   1 1520.95   50.49
   3   7   1 1666.53   57.59
  -3   7  -1 1558.14   48.70
   3   7   1 1509.15   47.80
   3   7   1 1540.15   52.99
   3   7   1 1533.15   49.20
   3   7   1 1637.34   55.79
  -3   7  -1 1429.16   49.20
   3   7   1 1656.43   50.89
   4  -7   1   57.89    5.90
  -4  -7  -1   68.79    4.00
   4  -7   1   72.59    5.80
   4  -7   1   67.59    6.20
   4  -7   1   70.79    5.40
  -4   7  -1   66.69    5.10
   4   7   1   59.69    5.60
   4   7   1   65.69    4.70
   4   7   1   64.39    6.40
   4   7   1   65.69    4.30
   4   7   1   63.19    7.60
   4   7   1   66.39    7.20
  -4   7  -1   56.99    5.10
   4   7   1   64.09    7.50
  -5  -7  -1   65.79    4.00
   5  -7   1   60.79    5.00
   5  -7   1   69.29    4.60
  -5  -7  -1   61.19    3.80
   5   7   1   64.39    5.90
   5   7   1   61.29    6.90
   5   7   1   54.59    7.10
   5   7   1   67.59    5.40
  -5   7  -1   66.39    5.30
  -5   7  -1   60.09    4.60
   5   7   1   64.89    4.50
   5   7   1   64.09    7.00
   6  -7   1  154.08    6.90
   6   7   1  163.68    9.30
  -6   7  -1  153.38    7.40
  -6   7  -1  160.38    6.90
   6   7   1  131.49    8.60
   6   7   1  163.18    8.30
   6  -8  -1  173.38    7.40
   6   8  -1  160.48    9.50
  -6   8   1  214.38   10.20
  -6   8   1  165.58    7.00
   6   8  -1  176.38    8.10
   5  -8  -1  166.28    8.40
   5  -8  -1  163.98    8.20
   5  -8  -1  173.68    7.90
   5   8  -1  169.68    9.10
  -5   8   1  153.58    8.10
  -5   8   1  157.48    7.80
   5   8  -1  166.98    7.80
   5   8  -1  150.88   11.00
   5   8  -1  157.18    9.80
   4  -8  -1   22.50    3.80
   4  -8  -1   28.00    3.50
   4  -8  -1   28.80    4.90
   4  -8  -1   26.80    3.90
  -4   8   1   29.40    3.40
   4   8  -1   25.10    4.30
   4   8  -1   29.10    5.60
   4   8  -1   29.50    7.70
   4   8  -1   28.90    3.20
  -4   8   1   25.50    3.20
   4   8  -1   27.10    2.90
   4   8  -1   29.80    5.90
   3  -8  -1   28.20    3.40
   3  -8  -1   27.30    4.20
   3  -8  -1   25.40    3.30
   3  -8  -1   26.40    4.40
   3   8  -1   32.70    5.90
   3   8  -1   23.00    6.50
  -3   8   1   22.00    3.70
   3   8  -1   29.60    3.20
   3   8  -1   29.20    3.20
   3   8  -1   35.10    8.00
  -3   8   1   24.20    3.10
  -3   8   1   25.70    2.90
   3   8  -1   28.40    6.10
  -3   8   1   14.90   15.20
   3   8  -1   28.20    5.10
   2  -8  -1 1395.26   43.90
   2  -8  -1 1427.36   44.90
   2  -8  -1 1334.77   42.70
   2  -8  -1 1326.87   42.10
   2  -8  -1 1419.56   70.49
   2   8  -1 1392.86   42.60
  -2   8   1 1328.77   42.20
  -2   8   1 1367.46   66.59
  -2   8   1 1396.16   42.10
   2   8  -1 1352.86   43.10
   2   8  -1 1267.47   43.60
   2   8  -1 1393.26   51.39
   2   8  -1 1396.06   49.10
   2   8  -1 1415.86   45.40
  -2   8   1 1428.86   45.70
   1  -8  -1 1327.47   41.70
   1  -8  -1 1274.27   61.49
  -1  -8   1 1301.17   39.70
  -1   8   1 1303.17   63.39
  -1   8   1 1307.47   41.20
  -1   8   1 1323.47   43.80
   1   8  -1 1297.77   40.90
  -1   8   1 1293.67   59.39
  -1   8   1 1247.48   39.10
   1   8  -1 1357.46   70.29
   1   8  -1 1373.56   41.60
   1   8  -1 1297.77   43.40
   0  -8   1  429.36   16.30
   0  -8  -1  458.35   29.70
   0  -8   1  460.95   16.60
   0   8  -1  472.65   17.20
   0   8   1  483.85   19.40
   0   8   1  456.35   32.20
   0   8   1  459.95   31.70
   0   8   1  453.25   16.60
   0   8  -1  465.25   19.00
   0   8  -1  451.45   32.80
  -1  -8  -1  119.09    6.20
   1  -8   1  130.29    7.20
   1  -8   1  139.29    7.70
   1   8   1  137.59   11.30
  -1   8  -1  127.59   16.00
  -1   8  -1  132.59    8.70
   1   8   1  138.99    8.60
  -1   8  -1  120.19   16.10
  -1   8  -1  129.49    5.80
  -1   8  -1  128.19    7.10
   1   8   1  149.59    8.30
   2  -8   1  267.57   11.80
   2  -8   1  287.77   13.00
   2  -8   1  275.97   13.30
   2  -8   1  272.67   11.60
   2   8   1  275.57   12.70
   2   8   1  306.57   18.00
   2   8   1  290.47   13.50
  -2   8  -1  271.07   13.70
   2   8   1  284.47   11.30
   2   8   1  283.47   14.80
  -2   8  -1  271.97   11.00
  -2   8  -1  279.57   25.50
  -2   8  -1  275.47   11.00
   2   8   1  278.97   13.00
   2   8   1  283.47   11.20
   2   8   1  306.77   17.20
   3  -8   1 1186.58   39.10
   3  -8   1 1140.09   36.70
   3  -8   1 1161.98   39.60
   3  -8   1 1122.69   37.10
   3   8   1 1141.29   43.70
  -3   8  -1 1151.08   37.00
   3   8   1 1130.89   36.20
   3   8   1 1159.58   41.00
  -3   8  -1 1068.29   57.89
   3   8   1 1134.09   37.60
   3   8   1 1116.69   38.30
  -3   8  -1 1172.98   36.30
   3   8   1 1054.49   35.30
   3   8   1 1139.59   44.00
   4  -8   1  208.88   11.10
   4  -8   1  183.58   10.80
   4  -8   1  193.48   10.60
   4  -8   1  209.38   10.20
   4   8   1  191.18   12.80
   4   8   1  193.88   13.70
   4   8   1  190.98    8.90
  -4   8  -1  209.18    9.90
  -4   8  -1  202.68    9.60
   5  -8   1  160.18    8.30
   5   8   1  165.38   11.20
   5   8   1  170.88    9.20
  -5   8  -1  168.28    7.70
   5   8   1  175.18   10.40
  -5   8  -1  187.68    9.60
   6  -8   1   38.90    2.50
   6  -8   1   45.00    2.80
  -6   8  -1   51.19    2.90
   6   8   1   43.50    3.90
  -6   9   1   17.00    1.40
  -6   9   1   17.50    1.60
   5  -9  -1  149.59    9.50
   5  -9  -1  135.29    7.20
   5  -9  -1  155.98    6.80
   5   9  -1  156.38    6.90
   5   9  -1  152.78   12.10
  -5   9   1  162.88    7.30
   5   9  -1  148.59    8.10
   5   9  -1  164.48    8.00
  -5   9   1  143.69    6.40
   4  -9  -1   67.69    5.00
   4  -9  -1   79.79    9.80
   4  -9  -1   66.89    5.80
   4  -9  -1   73.89    5.60
   4   9  -1   70.59    4.70
  -4   9   1   74.79    4.60
  -4   9   1   77.09    4.70
   4   9  -1   74.49    7.90
   4   9  -1   73.59    4.60
   4   9  -1   68.89    6.30
   4   9  -1   71.69    5.90
   3  -9  -1  208.58    9.60
   3  -9  -1  234.38   11.90
   3  -9  -1  217.58   11.10
   3  -9  -1  206.68    9.70
   3   9  -1  200.28   11.80
   3   9  -1  224.58    9.80
   3   9  -1  214.58    9.50
   3   9  -1  222.68   14.30
  -3   9   1  217.58    8.80
   3   9  -1  221.68   12.60
   3   9  -1  220.38   15.90
  -3   9   1  193.38   10.80
   3   9  -1  203.48   10.60
  -3   9   1  213.28    9.10
   2  -9  -1 1631.44   53.79
   2  -9  -1 1525.95   49.10
   2  -9  -1 1653.13   51.99
   2  -9  -1 1558.34   48.90
  -2   9   1 1570.74   48.00
   2   9  -1 1624.54   49.20
  -2   9   1 1627.64   49.99
   2   9  -1 1644.74   49.99
   2   9  -1 1592.64   56.09
   2   9  -1 1632.54   52.39
  -2   9   1 1574.24   51.99
   2   9  -1 1559.04   58.29
  -2   9   1 1638.64   78.49
   1  -9  -1 1691.53   77.19
   1  -9  -1 1632.14   50.89
  -1  -9   1 1654.03   50.29
   1  -9  -1 1627.94   51.89
  -1   9   1 1677.13   57.39
  -1   9   1 1764.12   82.89
  -1   9   1 1518.05   75.69
   1   9  -1 1622.04   55.19
   1   9  -1 1661.43   80.09
   1   9  -1 1694.73   55.19
   1   9  -1 1644.04   49.99
  -1   9   1 1640.84   50.99
   0  -9  -1 1267.47   61.19
   0  -9   1 1250.27   40.00
   0  -9  -1 1166.98   38.80
   0  -9   1 1221.98   39.40
   0  -9  -1 1269.87   39.00
   0   9  -1 1286.27   42.60
   0   9  -1 1221.88   38.10
   0   9  -1 1270.37   40.00
   0   9   1 1221.78   39.30
   0   9  -1 1233.78   65.09
   0   9   1 1305.27   42.90
   1  -9   1  505.95   18.90
   1  -9   1  467.35   17.40
   1  -9   1  490.35   19.30
  -1  -9  -1  494.05   16.40
   1   9   1  475.95   17.40
   1   9   1  511.25   20.60
  -1   9  -1  493.15   36.60
  -1   9  -1  519.35   18.60
  -1   9  -1  468.15   15.50
   1   9   1  468.95   20.90
  -1   9  -1  498.25   20.70
   2  -9   1 1785.62   56.49
   2  -9   1 1658.83   53.69
   2  -9   1 1739.33   53.59
   2  -9   1 1761.22   55.59
  -2   9  -1 1810.92   54.39
  -2   9  -1 1760.52   51.99
  -2   9  -1 1628.24   78.79
  -2   9  -1 1712.23   55.29
   2   9   1 1709.93   52.49
   2   9   1 1756.12   55.89
   2   9   1 1713.93   56.59
   2   9   1 1727.33   52.79
   2   9   1 1784.22   61.99
   3  -9   1   91.19    7.20
   3  -9   1   90.09    6.20
   3  -9   1  104.29    8.40
   3  -9   1   96.59    6.40
   3   9   1  105.39    8.40
  -3   9  -1   94.59    5.30
  -3   9  -1   92.99    5.10
   3   9   1   82.59   10.50
   3   9   1   98.29    7.10
   3   9   1   92.59    9.30
   3   9   1  100.89    7.30
   3   9   1   91.69    5.20
   4  -9   1   93.39    6.90
   4  -9   1   92.99    6.30
   4  -9   1   88.79    5.90
   4  -9   1   83.19    6.40
  -4   9  -1   93.39    5.10
   4   9   1   93.59    5.00
   4   9   1  102.09    7.80
   4   9   1   62.99   10.80
   4   9   1   97.19    6.60
  -4   9  -1   92.99    5.10
   5  -9   1  143.19    7.00
  -5   9  -1  138.19    6.10
   5   9   1  145.99    8.10
  -5   9  -1  145.39    6.60
   5 -10  -1   41.10    3.00
   5 -10  -1   40.90    2.50
  -5  10   1   39.00    2.10
  -5  10   1   38.70    2.40
   4 -10  -1  115.09    6.60
   4 -10  -1  121.69    7.40
   4 -10  -1  110.89    6.20
   4  10  -1  116.69    5.40
  -4  10   1  121.49    6.70
   4  10  -1  105.69    5.50
   4  10  -1  115.19    6.30
   3 -10  -1  114.49    6.60
   3 -10  -1  125.69    7.80
   3 -10  -1  114.49    6.50
   3 -10  -1  123.79    8.00
   3  10  -1  124.09    6.10
  -3  10   1  122.59    6.60
  -3  10   1  113.09    5.20
   3  10  -1  116.19    6.10
   2 -10  -1   30.10    3.00
   2 -10  -1   19.90    3.50
   2 -10  -1   31.80    3.70
  -2  10   1   24.50    5.10
   2  10  -1   36.10    5.50
  -2  10   1   24.70    2.90
   2  10  -1   34.50    7.00
   2  10  -1   26.10    2.90
   1 -10  -1  353.66   14.70
   1 -10  -1  344.47   14.00
  -1 -10   1  362.46   13.60
   1 -10  -1  314.17   12.60
  -1  10   1  344.67   13.40
  -1  10   1  358.66   16.20
   1  10  -1  318.57   13.50
   1  10  -1  324.47   12.50
   1  10  -1  357.26   17.30
   0 -10   1  351.26   14.70
   0 -10  -1  365.96   14.10
   0 -10   1  384.26   18.30
   0  10   1  383.96   14.30
   0  10  -1  404.66   18.50
   0  10   1  373.76   17.20
   0  10  -1  363.56   14.80
   1 -10   1  467.75   18.20
   1 -10   1  468.65   18.80
   1 -10   1  426.16   16.60
  -1 -10  -1  481.95   16.30
   1  10   1  443.36   16.30
  -1  10  -1  475.65   20.30
  -1  10  -1  454.75   17.40
   1  10   1  441.86   19.30
   2 -10   1  132.89    8.60
   2 -10   1  129.99    7.20
   2 -10   1  145.19    8.60
  -2  10  -1  133.79    7.90
   2  10   1  128.49   11.70
   2  10   1  131.49    6.30
   2  10   1  122.59    9.20
  -2  10  -1  128.49    5.20
   3 -10   1  253.47   10.90
   3 -10   1  242.08   12.40
   3 -10   1  251.37   10.90
   3 -10   1  251.47   12.30
   3  10   1  241.78   12.10
   3  10   1  229.98    9.70
  -3  10  -1  242.78    9.00
  -3  10  -1  237.98   10.60
   3  10   1  230.08   12.10
   4 -10   1   35.30    3.40
   4 -10   1   18.60    3.30
   4 -10   1   30.10    4.40
  -4  10  -1   29.80    3.00
   4  10   1   29.90    4.30
  -4  10  -1   32.20    2.30
  -5  10  -1  150.38    4.90
  -5  10  -1  141.89    5.80
   4 -11  -1  134.69    6.80
   4 -11  -1  148.89    6.40
   4 -11  -1  140.69    6.50
  -4  11   1  124.99    5.40
   3 -11  -1  177.68    7.80
   3 -11  -1  183.28    8.10
   3 -11  -1  175.08    9.10
   3 -11  -1  155.58    9.00
  -3  11   1  174.98    7.30
   3  11  -1  167.18    6.80
   3  11  -1  164.58    6.90
   2 -11  -1  117.69    6.10
   2 -11  -1  115.89    7.40
   2 -11  -1  115.29    7.10
  -2  11   1  111.69    8.30
  -2  11   1  109.79    5.70
   2  11  -1  111.19    5.30
   2  11  -1  111.39    5.80
   1 -11  -1    2.00    1.40
   1 -11  -1    4.50    1.70
   1 -11  -1    3.60    1.40
  -1  11   1    9.20    3.80
   1  11  -1    5.00    1.50
  -1  11   1    8.50    1.80
   0 -11  -1  377.06   14.90
   0 -11   1  388.16   15.60
   0 -11   1  391.76   15.40
   0 -11  -1  382.46   14.60
   0  11  -1  385.86   14.70
   0  11   1  367.56   13.70
   0  11   1  389.56   17.30
  -1 -11  -1   70.39    4.80
   1 -11   1   75.69    5.50
   1 -11   1   66.29    5.60
   1 -11   1   65.59    4.90
  -1  11  -1   97.59    9.70
   1  11   1   89.09    7.60
   1  11   1   65.59    4.00
  -1  11  -1   65.39    4.70
   2 -11   1   36.70    3.80
   2 -11   1   52.09    5.70
   2 -11   1   40.00    4.50
  -2  11  -1   38.20    3.40
   2  11   1   57.99    7.90
   3 -11   1  126.59    7.70
   3 -11   1  132.39    6.60
   3 -11   1  127.09    7.80
  -3  11  -1  129.09    6.30
   4 -11   1  110.29    5.00
   4 -11   1   83.89    5.90
  -4  11  -1   93.39    4.50
   3 -12  -1  276.07   11.10
   3 -12  -1  233.38   10.20
   3 -12  -1  296.37   10.20
   2 -12  -1  114.39    5.80
   2 -12  -1  113.69    9.70
   2  12  -1  118.29    5.10
  -2  12   1  114.79    4.90
  -2  12   1  129.89    8.00
   1 -12  -1  141.29    7.60
   1 -12  -1  152.98    7.80
   1 -12  -1  140.59    6.60
   1  12  -1  141.19    6.40
  -1  12   1  151.18    6.60
   0 -12   1  131.89    7.00
   0 -12   1  137.69    7.20
   0 -12  -1  131.89    6.70
   0  12  -1  132.39    6.20
   1 -12   1  104.79    6.30
   1 -12   1  100.29    6.20
   1 -12   1   96.49    5.40
  -1  12  -1   91.69    5.10
   2 -12   1  128.39    7.10
   2 -12   1  112.59    6.00
   2 -12   1  128.09    6.90
  -2  12  -1  113.09    5.50
   3 -12   1  127.79    5.50
   3 -12   1   86.69    4.40
  -3  12  -1  106.59    4.60
   2 -13  -1  236.58    8.50
   1 -13  -1   -0.40    1.10
   0  13  -1   33.90    2.50
   1 -13   1   45.30    3.10
  -1  13  -1   42.60    2.40
   2 -13   1   82.89    4.00
   8   0  -2   -0.20    1.10
   8   0  -2    1.00    0.80
   7   0  -2    2.10    1.70
  -7   0   2    0.90    0.80
   7   0  -2    1.80    1.90
  -7   0   2    2.10    1.10
   7   0  -2    0.40    1.20
  -7   0   2    1.00    1.10
   7   0  -2    0.70    1.30
   6   0  -2   17.20    3.50
   6   0  -2   15.20    3.30
  -6   0   2   20.90    3.60
  -6   0   2   14.30    2.20
  -6   0   2   15.80    2.90
  -6   0   2   13.70    2.90
   6   0  -2   19.10    3.20
   6   0  -2   20.80    4.10
  -6   0   2   16.80    2.80
  -5   0   2  152.98    7.40
   5   0  -2  152.98    7.40
   5   0  -2  149.88    7.60
  -5   0   2  153.28    7.70
  -5   0   2  152.28    8.20
  -5   0   2  158.18    6.80
  -5   0   2  148.59    9.10
   5   0  -2  154.98   12.20
  -5   0   2  137.39   15.90
  -4   0   2 1471.05   47.30
  -4   0   2 1476.55   44.80
  -4   0   2 1469.05   45.30
  -4   0   2 1440.26   51.79
  -3   0   2 2837.32   83.59
  -3   0   2 2922.81  108.69
  -3   0   2 2825.82   88.69
  -2   0   2   11.20    5.60
   2   0  -2   22.50    4.00
   1   0  -2 2452.05   72.19
   1   0  -2 2426.76   72.09
   0   0   2 4965.80  143.79
  -1   0  -2  538.45   20.30
  -1   0  -2  571.84   19.30
  -2   0  -2    7.10    1.30
  -2   0  -2    7.80    2.30
  -3   0  -2 1130.89   35.10
  -3   0  -2 1161.88   40.70
  -3   0  -2 1168.68   35.50
   4   0   2   57.89    4.30
  -4   0  -2   60.79    4.20
  -4   0  -2   58.89    4.10
  -4   0  -2   56.59    6.80
  -4   0  -2   46.20    4.50
  -5   0  -2 1105.69   39.30
  -5   0  -2 1058.19   35.20
  -5   0  -2 1103.09   34.60
   5   0   2 1006.20   35.50
   5   0   2 1088.99   38.70
   5   0   2 1018.20   37.00
  -5   0  -2 1075.69   44.70
   5   0   2 1149.08   39.50
  -6   0  -2    4.50    1.60
   6   0   2    4.60    1.90
  -6   0  -2    4.40    1.60
   6   0   2    3.90    1.70
   6   0   2    5.20    2.90
  -6   0  -2    4.20    1.30
   7   0   2    5.30    1.50
  -7   0  -2    6.00    1.10
   7   0   2    7.00    2.10
   7   0   2    8.40    1.90
  -7   0  -2    7.30    1.40
   7   0   2   12.40    2.40
   8  -1  -2    8.30    1.40
  -8  -1   2    9.20    0.90
   8   1  -2    6.10    1.20
   8   1  -2    7.40    1.60
  -7  -1   2   99.99    5.90
  -7  -1   2  104.29    5.70
   7  -1  -2  100.99    6.10
   7  -1  -2  111.19    7.00
   7  -1  -2  106.49    7.00
  -7  -1   2  107.39    4.90
   7   1  -2   96.29    6.90
  -7   1   2  101.99    7.90
  -7   1   2   99.79    5.90
   7   1  -2  111.69    7.50
   7   1  -2   99.59    6.40
   7   1  -2   97.49    6.20
  -7   1   2  103.29    5.30
  -7   1   2  111.59    4.70
   6  -1  -2  523.35   20.10
  -6  -1   2  581.04   19.10
  -6  -1   2  556.14   19.70
   6  -1  -2  588.44   22.70
  -6  -1   2  586.64   20.70
   6  -1  -2  593.44   21.20
   6  -1  -2  585.84   22.10
   6   1  -2  571.94   21.00
  -6   1   2  563.94   20.40
  -6   1   2  573.34   19.00
   6   1  -2  561.84   22.60
   6   1  -2  585.14   21.50
  -6   1   2  588.94   23.40
   6   1  -2  586.94   23.50
  -6   1   2  565.64   19.90
  -5  -1   2  453.35   17.60
  -5  -1   2  478.95   17.10
   5  -1  -2  455.85   16.30
   5  -1  -2  414.36   18.20
   5  -1  -2  498.25   17.60
  -5  -1   2  464.45   24.20
  -5  -1   2  438.56   15.80
  -5  -1   2  446.56   16.50
   5   1  -2  466.95   17.10
   5   1  -2  443.06   23.90
  -5   1   2  527.45   29.10
  -5   1   2  478.55   17.90
   5   1  -2  464.55   17.60
  -5   1   2  460.85   19.30
   5   1  -2  474.35   17.30
  -5   1   2  484.25   17.10
  -5   1   2  481.55   15.90
  -5   1   2  460.55   16.80
   5   1  -2  457.05   19.10
  -4  -1   2  764.82   49.60
  -4  -1   2  823.02   26.40
  -4  -1   2  785.52   31.90
  -4  -1   2  810.22   26.00
  -4  -1   2  764.82   27.90
  -4   1   2  796.72   25.70
  -4   1   2  815.52   28.40
  -4   1   2  806.42   32.80
  -4   1   2  808.02   26.50
  -3  -1   2 1877.81   55.69
  -3  -1   2 1877.11   60.09
  -3  -1   2 1781.22   76.09
  -3   1   2 1905.91   57.69
  -3   1   2 1858.91   55.79
  -3   1   2 1897.61   61.29
  -3   1   2 1894.91   78.89
  -2   1   2 9208.18  281.27
   1  -1  -2 1311.97   41.70
   1   1  -2 1384.86   40.50
  -1   1   2 1354.36   48.80
  -1  -1  -2 5469.85  156.68
  -1  -1  -2 5274.97  154.38
  -1   1  -2 5241.18  155.78
  -1   1  -2 5394.86  155.38
  -1   1  -2 5384.36  155.08
  -2  -1  -2 1509.15   46.60
  -2  -1  -2 1510.45   48.90
  -2   1  -2 1556.44   46.10
  -2   1  -2 1662.13   50.39
  -3  -1  -2 1456.45   50.49
  -3  -1  -2 1543.35   45.80
  -3   1  -2 1535.35   47.40
  -3   1  -2 1530.55   46.00
  -3   1  -2 1515.45   45.60
  -3   1  -2 1564.14   51.99
  -4  -1  -2  563.84   18.70
  -4  -1  -2  562.94   25.00
  -4  -1  -2  561.14   19.00
   4   1   2  568.14   32.70
  -4   1  -2  523.95   25.30
  -4   1  -2  530.85   20.50
   4   1   2  541.65   21.20
  -4   1  -2  539.95   19.10
   4   1   2  523.75   19.70
  -4   1  -2  517.65   18.70
   4   1   2  527.55   19.40
  -4   1  -2  524.15   17.40
  -5  -1  -2   69.89    4.70
  -5  -1  -2   71.99    8.50
  -5  -1  -2   70.19    5.10
   5  -1   2   63.99    6.30
   5  -1   2   55.19    6.30
   5   1   2   66.19    5.70
  -5   1  -2   70.49    4.10
   5   1   2   50.99    6.10
   5   1   2   83.09    6.60
   5   1   2   69.79    5.50
  -5   1  -2   63.19    8.90
  -5   1  -2   69.89    4.80
  -5   1  -2   69.39    5.00
  -5   1  -2   62.59    5.40
   6  -1   2    0.00    2.10
  -6  -1  -2    2.40    1.20
   6  -1   2    1.60    1.50
   6  -1   2    0.90    1.40
  -6  -1  -2    1.20    0.90
  -6  -1  -2    2.70    1.40
   6   1   2    3.00    1.60
   6   1   2    2.60    1.50
  -6   1  -2    3.70    1.80
  -6   1  -2    3.70    1.20
  -6   1  -2    2.60    1.20
   6   1   2    5.70    2.30
   6   1   2    4.10    3.30
  -6   1  -2   -0.30    0.80
   6   1   2    1.60    2.70
   7  -1   2  115.49    5.80
   7  -1   2   95.09    7.70
  -7  -1  -2  131.09    4.90
   7  -1   2  120.99    6.00
  -7  -1  -2  118.19    5.40
   7   1   2  127.79    6.20
   7   1   2  121.19    6.00
   7   1   2  124.69    6.80
  -7   1  -2  127.79    4.50
   7   1   2   98.49    6.70
  -7   1  -2  110.69    4.90
   8  -2  -2    3.20    1.00
  -8  -2   2    3.70    0.70
   8   2  -2    4.90    1.20
   8   2  -2    4.90    1.60
  -7  -2   2  140.19    6.90
   7  -2  -2  138.09    7.30
   7  -2  -2  138.49    7.30
  -7  -2   2  140.69    5.90
  -7  -2   2  131.39    7.00
   7  -2  -2  146.79    7.90
  -7   2   2  141.69    6.90
   7   2  -2  151.68    7.70
  -7   2   2  137.59    8.20
   7   2  -2  144.99    8.80
  -7   2   2  150.48    5.50
   7   2  -2  142.79    8.70
  -6  -2   2  562.64   19.80
   6  -2  -2  568.64   19.80
   6  -2  -2  610.44   22.50
  -6  -2   2  580.24   19.40
  -6  -2   2  599.64   20.90
  -6  -2   2  590.74   21.70
  -6   2   2  576.14   20.20
   6   2  -2  596.04   24.20
   6   2  -2  589.74   20.70
   6   2  -2  589.54   21.70
  -6   2   2  601.24   19.10
  -6   2   2  579.54   21.00
   6   2  -2  588.24   23.40
  -6   2   2  576.84   23.30
   6   2  -2  588.74   21.90
  -6   2   2  557.54   21.40
  -6   2   2  595.64   20.50
  -5  -2   2  741.63   25.90
  -5  -2   2  750.62   25.30
   5  -2  -2  726.63   24.70
  -5  -2   2  704.93   24.00
  -5  -2   2  693.13   24.40
  -5  -2   2  744.93   32.80
  -5   2   2  763.72   42.40
   5   2  -2  738.03   26.10
  -5   2   2  755.42   25.00
   5   2  -2  766.52   25.70
  -5   2   2  698.53   26.30
  -5   2   2  804.22   25.30
  -5   2   2  790.62   28.30
   5   2  -2  789.52   28.50
  -5   2   2  762.22   25.80
   5   2  -2  744.03   27.20
   5   2  -2  779.72   34.50
   5   2  -2  753.02   25.80
   5   2  -2  774.02   25.60
  -5   2   2  713.93   23.60
  -4  -2   2 1600.54   77.29
  -4  -2   2 1527.25   53.99
  -4  -2   2 1606.94   48.00
  -4  -2   2 1530.25   47.40
  -4   2   2 1616.94   51.49
  -4   2   2 1572.74   63.69
  -4   2   2 1540.25   47.90
  -4   2   2 1472.95   47.00
  -3  -2   2 5535.85  156.68
  -3  -2   2 5571.54  182.18
  -3   2   2 5641.44  159.08
  -3   2   2 5398.16  162.78
  -3   2   2 5112.29  156.68
  -2   2   2 5159.38  143.49
  -2   2   2 5091.79  146.49
   2   2  -2 4620.04  153.68
  -1   2   2 8147.08  237.98
  -1   2   2 8437.46  244.58
   0  -2   2 8042.20  234.68
   0   2  -2 8467.15  231.78
   0   2  -2 8057.29  234.08
  -1  -2  -2 9466.35  270.37
  -1   2  -2 9513.75  269.17
  -1   2  -2 9562.34  271.67
  -1   2  -2 8927.31  269.57
   2  -2   2 3842.52  112.79
  -2  -2  -2 3682.33  113.89
  -2  -2  -2 3823.72  110.99
  -2   2  -2 3922.91  111.59
  -2   2  -2 4035.70  116.59
  -2   2  -2 3782.12  116.19
  -2   2  -2 4042.50  117.99
  -3  -2  -2  784.82   33.30
   3  -2   2  736.63   25.10
  -3  -2  -2  738.13   23.70
  -3   2  -2  766.82   24.20
  -3   2  -2  733.53   29.60
  -3   2  -2  761.72   24.20
   3   2   2  731.33   36.60
  -3   2  -2  730.93   30.40
  -3   2  -2  732.63   31.40
  -3   2  -2  760.12   25.50
  -4  -2  -2  337.67   12.90
  -4  -2  -2  350.46   18.20
   4  -2   2  336.07   13.60
  -4  -2  -2  352.36   13.30
   4   2   2  350.26   15.90
  -4   2  -2  351.26   20.00
  -4   2  -2  349.96   13.50
   4   2   2  360.56   14.20
  -4   2  -2  361.56   15.20
   4   2   2  342.27   14.60
  -5  -2  -2  334.77   13.10
  -5  -2  -2  321.47   13.40
  -5  -2  -2  330.37   19.40
  -5  -2  -2  325.77   11.90
   5  -2   2  349.17   17.20
   5  -2   2  291.97   15.10
  -5   2  -2  327.57   11.70
  -5   2  -2  339.37   15.30
   5   2   2  325.97   14.90
   5   2   2  326.77   14.30
   5   2   2  346.17   14.80
  -5   2  -2  336.17   21.20
   5   2   2  334.57   16.30
   5   2   2  336.27   14.70
  -5   2  -2  334.07   12.90
  -5   2  -2  320.37   13.40
   6  -2   2  117.69    7.10
  -6  -2  -2  120.29    6.40
  -6  -2  -2  118.49    6.60
   6  -2   2  112.49    6.60
  -6  -2  -2  121.59    5.40
  -6   2  -2  110.09    7.40
  -6   2  -2  122.39    6.60
   6   2   2  107.79    8.30
  -6   2  -2  113.79    5.10
  -6   2  -2  109.19    6.70
  -6   2  -2  116.59    6.50
   6   2   2  113.89    7.10
   6   2   2  102.29    7.00
   6   2   2  114.09   10.10
   6   2   2  114.29    7.90
   6   2   2  118.99    7.30
  -7  -2  -2  131.09    5.00
   7  -2   2  123.39    5.90
   7  -2   2  102.19    7.70
   7  -2   2  122.49    6.00
  -7  -2  -2  123.49    5.50
   7   2   2  119.69    6.00
  -7   2  -2  123.89    4.50
   7   2   2  126.69    6.30
   7   2   2  129.89    7.30
  -8  -3   2    9.40    1.20
   8  -3  -2    7.70    1.20
   8   3  -2    5.80    2.50
  -7  -3   2  184.58    8.60
   7  -3  -2  193.38    9.00
  -7  -3   2  213.58    9.30
  -7  -3   2  188.28    8.20
   7  -3  -2  188.78    8.80
  -7   3   2  199.88    8.60
  -7   3   2  170.08    9.30
   7   3  -2  192.58    9.10
   7   3  -2  203.08   13.10
   7   3  -2  183.98   10.40
  -6  -3   2  318.97   13.30
   6  -3  -2  318.37   12.80
  -6  -3   2  310.47   11.50
  -6  -3   2  307.97   13.20
   6  -3  -2  302.47   12.10
  -6  -3   2  310.47   12.60
   6  -3  -2  283.57   13.20
   6   3  -2  299.47   12.70
   6   3  -2  322.87   13.90
   6   3  -2  330.67   15.60
  -6   3   2  309.07   10.70
  -6   3   2  309.27   13.50
   6   3  -2  335.17   14.10
  -6   3   2  313.77   11.70
  -6   3   2  293.47   16.30
   6   3  -2  313.77   16.00
  -5  -3   2   81.99    5.50
  -5  -3   2   72.29    4.70
  -5  -3   2   78.29    5.20
  -5  -3   2   77.29    4.90
  -5  -3   2   71.59    8.20
   5  -3  -2   77.99    5.30
   5   3  -2   79.89    5.90
  -5   3   2   81.19    5.30
   5   3  -2   81.29    6.10
   5   3  -2   82.09    5.50
   5   3  -2   87.29    7.40
  -5   3   2   80.19    5.10
  -5   3   2   83.19    6.80
   5   3  -2   81.59    9.80
  -5   3   2   85.59   10.60
   5   3  -2   75.39    6.80
  -5   3   2   80.19    6.10
  -5   3   2   76.99    4.20
  -5   3   2   95.69    5.20
   5   3  -2   81.49    5.80
  -4  -3   2  436.96   16.10
  -4  -3   2  459.45   21.00
   4  -3  -2  480.95   17.90
  -4  -3   2  473.15   36.10
   4  -3  -2  447.86   16.80
   4  -3  -2  462.35   16.90
  -4  -3   2  463.05   16.50
   4   3  -2  437.56   18.70
  -4   3   2  458.25   16.00
   4   3  -2  448.96   16.50
   4   3  -2  449.76   17.00
   4   3  -2  531.65   28.00
  -4   3   2  429.66   16.00
  -4   3   2  480.15   23.70
   4   3  -2  459.55   16.50
  -4   3   2  476.45   18.80
   4   3  -2  446.96   20.40
  -4   3   2  457.25   16.50
   3  -3  -2 3398.26  101.69
  -3  -3   2 3519.95  101.29
   3  -3  -2 3351.36  121.79
  -3   3   2 3712.23  103.99
  -3   3   2 3486.65  101.39
  -3   3   2 3451.15  107.99
   2  -3  -2 6532.95  195.38
   2  -3  -2 6309.37  181.38
  -2   3   2 6148.08  185.18
  -2   3   2 6462.15  182.78
   2   3  -2 6220.28  194.98
   1  -3  -2 2065.69   68.89
  -1  -3   2 2225.28   65.59
  -1   3   2 2114.09   74.59
  -1   3   2 2285.17   67.39
  -1   3   2 2307.87   65.79
   0   3  -2  289.57   10.80
   0   3   2  289.27   18.00
   1  -3   2 3976.70  114.79
  -1  -3  -2 3930.31  114.89
  -1  -3  -2 4046.20  118.69
   1   3   2 3949.30  119.39
   1   3   2 3945.91  128.39
  -1   3  -2 3880.61  122.09
  -1   3  -2 4038.70  117.29
  -2  -3  -2 5244.98  150.58
  -2  -3  -2 4785.02  149.39
   2  -3   2 5181.48  150.08
  -2   3  -2 5335.87  149.79
  -2   3  -2 5059.19  152.48
   2   3   2 5408.26  166.38
  -2   3  -2 5234.58  157.88
  -2   3  -2 5180.58  153.98
   3  -3   2  436.96   16.70
  -3  -3  -2  430.66   18.10
  -3   3  -2  417.76   22.20
  -3   3  -2  423.26   15.00
   3   3   2  451.25   27.50
  -3   3  -2  424.06   20.00
  -3   3  -2  450.85   21.20
  -3   3  -2  427.16   16.50
   4  -3   2   15.40    2.50
   4  -3   2   16.40    2.90
  -4  -3  -2   14.10    3.40
  -4  -3  -2   11.90    2.20
   4   3   2   21.00    3.60
   4   3   2   19.30    4.50
   4   3   2   22.90    4.10
  -4   3  -2   13.80    4.80
  -4   3  -2   11.70    2.10
   4   3   2   16.90    3.20
  -4   3  -2   15.30    1.70
  -4   3  -2   12.70    2.20
   4   3   2   17.60    5.10
  -4   3  -2    9.20    2.60
   4   3   2   20.00    3.30
   4   3   2   16.00    3.10
   4   3   2   31.20    8.20
  -5  -3  -2  394.96   15.40
  -5  -3  -2  403.06   14.20
  -5  -3  -2  438.96   22.00
  -5  -3  -2  440.76   16.00
   5  -3   2  409.26   16.10
   5   3   2  409.96   22.60
  -5   3  -2  416.06   13.90
  -5   3  -2  408.76   16.20
   5   3   2  421.16   19.40
   5   3   2  413.46   17.70
   5   3   2  401.16   17.20
   5   3   2  446.76   17.40
  -5   3  -2  407.96   15.70
   5   3   2  421.76   16.90
  -5   3  -2  386.46   17.50
   5   3   2  423.06   19.40
  -5   3  -2  401.96   15.60
   6  -3   2   19.70    3.00
  -6  -3  -2   21.20    2.50
  -6  -3  -2   19.30    2.00
  -6   3  -2   19.10    1.70
   6   3   2   22.00    5.20
   6   3   2   17.10    3.90
  -6   3  -2   22.40    3.80
   6   3   2   19.70    3.90
  -6   3  -2   19.80    2.40
  -6   3  -2   19.60    2.70
   6   3   2   17.90    3.30
   6   3   2   24.80    4.00
   6   3   2   22.30    3.80
   7  -3   2    3.80    1.20
  -7  -3  -2    4.10    0.90
   7  -3   2    2.90    1.20
  -7  -3  -2    3.60    1.10
   7   3   2    5.70    1.80
   7   3   2    2.80    1.90
   7  -4  -2  230.98    9.40
  -7  -4   2  221.98    8.90
   7  -4  -2  208.58   10.80
  -7  -4   2  217.88    9.20
  -7  -4   2  223.38    8.00
   7   4  -2  206.68   11.20
   7   4  -2  225.58    9.70
  -7   4   2  222.78    9.10
   7   4  -2  226.88   10.00
  -7   4   2  233.08   10.50
   7   4  -2  232.68   11.30
   6  -4  -2  138.09    7.50
  -6  -4   2  138.59    7.40
  -6  -4   2  143.99    7.10
  -6  -4   2  142.39    6.20
   6  -4  -2  143.79    7.20
  -6  -4   2  129.39    6.10
   6   4  -2  124.59    7.60
   6   4  -2  163.88   15.20
  -6   4   2  130.29    4.90
   6   4  -2  133.59    8.00
   6   4  -2  130.49   11.00
  -6   4   2  130.49    7.70
  -6   4   2  135.99    8.80
  -5  -4   2  169.08   24.30
  -5  -4   2  119.09    7.70
   5  -4  -2  143.09    7.50
   5  -4  -2  145.49    7.30
  -5  -4   2  149.79   10.80
  -5  -4   2  139.49    7.30
  -5  -4   2  144.39    7.60
  -5   4   2  128.49    8.90
  -5   4   2  145.69    7.20
   5   4  -2  142.49    8.50
   5   4  -2  144.89    7.50
  -5   4   2  151.88    8.80
   5   4  -2  146.89   10.20
   5   4  -2  129.89    7.60
   5   4  -2  149.79    7.90
   5   4  -2  152.58    8.60
   5   4  -2  150.48    9.80
   5   4  -2  142.39   13.20
  -4  -4   2  416.76   35.40
   4  -4  -2  418.96   16.90
  -4  -4   2  438.26   15.60
  -4  -4   2  404.36   15.20
   4  -4  -2  442.16   16.50
  -4  -4   2  435.76   19.80
   4  -4  -2  435.96   15.70
  -4   4   2  437.66   23.20
  -4   4   2  345.77   18.30
   4   4  -2  400.86   16.50
   4   4  -2  429.06   15.70
   4   4  -2  433.76   15.70
  -4   4   2  408.86   13.60
  -4   4   2  413.46   14.50
  -4   4   2  431.56   17.80
   4   4  -2  413.96   16.40
   4   4  -2  446.46   18.90
   4   4  -2  503.95   22.40
   4   4  -2  427.86   22.40
   3  -4  -2 1130.39   36.00
  -3  -4   2 1108.09   34.30
   3  -4  -2 1117.29   35.30
   3  -4  -2 1068.69   53.49
  -3   4   2 1129.89   41.40
  -3   4   2 1158.68   37.00
   2  -4  -2 3509.25  104.79
   2  -4  -2 3677.43  120.79
   2   4  -2 3601.34  121.39
  -2   4   2 3632.64  105.89
  -2   4   2 3758.72  108.89
  -2   4   2 3566.34  105.69
  -2   4   2 3506.65  108.79
  -1  -4   2 3678.33  108.89
   1  -4  -2 3618.34  107.29
   1  -4  -2 3525.75  110.79
   1   4  -2 3947.41  123.09
  -1   4   2 3835.02  113.79
   0  -4   2 1239.18   39.20
   0  -4   2 1208.38   40.90
   0  -4   2 1378.06   39.40
   0   4   2 1243.18   51.89
   0   4   2 1275.47   47.40
  -1  -4  -2 8390.66  244.58
  -1  -4  -2 8260.87  240.38
   1  -4   2 8558.94  240.68
  -1   4  -2 8169.48  251.37
   1   4   2 8677.33  249.08
   1   4   2 8421.06  258.57
   2  -4   2 4347.47  128.19
   2  -4   2 4358.06  127.89
  -2  -4  -2 4494.05  127.89
  -2   4  -2 4244.68  131.99
   2   4   2 4496.95  147.09
  -2   4  -2 4287.47  138.59
  -2   4  -2 4464.05  127.89
  -3  -4  -2 2493.45   73.89
   3  -4   2 2589.34   76.79
  -3  -4  -2 2604.84   78.29
   3  -4   2 2483.55   77.09
  -3   4  -2 2404.36   82.59
  -3   4  -2 2511.15   87.99
  -3   4  -2 2557.04   76.99
   3   4   2 2553.14   97.19
  -3   4  -2 2582.74   73.89
  -4  -4  -2 2804.52   82.99
   4  -4   2 2901.01   84.69
   4  -4   2 3134.39   88.79
   4  -4   2 2674.43   84.49
   4  -4   2 2809.52   83.19
  -4  -4  -2 2884.91   89.29
  -4  -4  -2 2710.93   82.59
  -4   4  -2 2704.33   81.09
   4   4   2 2805.62   85.99
  -4   4  -2 2459.35   82.39
   4   4   2 2776.52   93.39
  -4   4  -2 2860.31   86.19
   4   4   2 2786.22   85.69
  -4   4  -2 2824.72   84.39
   4   4   2 2854.91   85.79
   4   4   2 2760.82   87.89
   4   4   2 2873.81   89.19
   4   4   2 2919.71   84.19
   4   4   2 2930.01   85.49
   5  -4   2  347.17   14.00
  -5  -4  -2  352.46   13.40
  -5  -4  -2  316.47   11.80
  -5  -4  -2  334.87   12.90
   5   4   2  333.27   17.00
   5   4   2  326.37   14.90
   5   4   2  355.96   17.40
   5   4   2  322.77   19.40
  -5   4  -2  314.47   10.90
   5   4   2  344.77   14.80
  -5   4  -2  338.27   13.90
  -5   4  -2  317.17   15.20
   5   4   2  342.47   15.50
   5   4   2  336.07   14.30
   6  -4   2   36.60    4.60
  -6  -4  -2   28.70    2.70
   6  -4   2   24.60    2.80
  -6  -4  -2   28.60    2.30
   6   4   2   30.40    4.70
   6   4   2   29.50    3.40
  -6   4  -2   29.30    3.00
   6   4   2   18.90    3.90
   6   4   2   29.90    3.50
  -6   4  -2   21.10    3.40
   6   4   2   21.40    3.90
   6   4   2   26.00    4.00
   7  -4   2   55.49    3.20
  -7  -4  -2   61.99    3.40
   7  -4   2   64.19    3.10
   7   4   2   56.09    3.30
   7   4   2   51.19    5.40
   7  -5  -2   26.10    2.50
  -7  -5   2   25.90    1.90
  -7  -5   2   23.90    2.30
  -7   5   2   15.40    2.60
   7   5  -2   20.40    3.40
  -7   5   2   34.50    3.20
   7   5  -2   28.10    3.20
   6  -5  -2   44.80    3.90
  -6  -5   2   43.80    3.10
  -6  -5   2   42.40    3.40
  -6  -5   2   50.19    3.90
   6  -5  -2   56.59    4.30
   6   5  -2   48.70    4.90
   6   5  -2   41.80    5.50
   6   5  -2   53.19    4.60
  -6   5   2   45.60    4.60
   6   5  -2   45.60    4.00
   6   5  -2   34.00    5.50
  -6   5   2   44.40    4.10
   5  -5  -2  171.08    8.20
   5  -5  -2  171.38    8.50
  -5  -5   2  168.88    8.00
   5  -5  -2  158.38    9.00
  -5  -5   2  162.88   11.10
  -5  -5   2  177.28    8.50
   5   5  -2  172.98   11.70
   5   5  -2  169.68    8.80
   5   5  -2  170.08    8.80
   5   5  -2  178.78    9.80
   5   5  -2  169.68    8.40
   5   5  -2  179.58   15.20
   5   5  -2  164.18    9.20
  -5   5   2  157.28    9.90
   5   5  -2  168.48   10.70
  -5   5   2  170.98    9.50
   4  -5  -2  198.28    9.90
  -4  -5   2  181.28    8.60
  -4  -5   2  217.08   13.30
  -4  -5   2  163.58   22.90
   4  -5  -2  188.38    9.00
  -4  -5   2  202.98    8.70
   4  -5  -2  195.38    8.60
   4  -5  -2  203.08   10.80
   4   5  -2  203.48   12.00
  -4   5   2  181.68    8.20
  -4   5   2  201.88   10.80
   4   5  -2  181.98    9.30
   4   5  -2  205.68    9.90
   4   5  -2  200.58   10.90
   4   5  -2  194.08    9.60
  -4   5   2  189.58    9.70
   4   5  -2  198.38   14.80
   4   5  -2  206.78    9.20
   4   5  -2  195.98    8.90
   3  -5  -2   33.20    9.90
   3  -5  -2   60.09    4.70
   3  -5  -2   63.99    4.60
  -3  -5   2   61.49    3.70
  -3   5   2   57.89    4.90
  -2  -5   2  636.94   21.90
   2  -5  -2  633.94   20.80
   2  -5  -2  588.54   33.70
   2  -5  -2  599.44   20.40
  -2   5   2  617.14   21.30
   2   5  -2  584.44   34.80
  -2   5   2  630.84   25.70
  -1  -5   2  171.28    8.50
   1  -5  -2  166.78    9.60
   1  -5  -2  170.38    6.70
   1   5  -2  149.88   14.70
  -1   5   2  166.38    7.10
  -1   5   2  164.38   17.10
   0  -5   2  439.16   18.80
   0  -5  -2  441.46   14.30
   0  -5   2  462.55   15.50
   0   5  -2  530.95   17.60
   0   5   2  448.96   24.90
   1  -5   2 6944.31  201.98
  -1  -5  -2 6883.01  205.88
  -1   5  -2 7263.47  201.38
   1   5   2 6962.70  213.28
  -1   5  -2 7215.08  217.38
   1   5   2 6869.01  222.48
  -2  -5  -2  432.26   21.30
   2  -5   2  429.66   16.30
  -2  -5  -2  413.66   15.50
   2  -5   2  438.56   16.70
  -2   5  -2  419.86   25.30
  -2   5  -2  449.06   16.10
   2   5   2  426.06   29.00
  -3  -5  -2 1820.52   53.49
   3  -5   2 1574.84   57.49
   3  -5   2 1681.83   59.79
   3  -5   2 1879.51   57.89
  -3  -5  -2 1940.41   57.49
   3   5   2 1671.83   58.89
   3   5   2 1892.01   64.39
   3   5   2 1980.70   64.59
   3   5   2 1889.71   60.59
   3   5   2 1756.32   56.69
  -3   5  -2 1604.94   56.09
  -3   5  -2 1861.01   70.99
  -3   5  -2 1843.22   56.79
   3   5   2 1963.30   57.79
   3   5   2 1887.91   55.29
   4  -5   2  445.36   17.10
  -4  -5  -2  482.25   20.40
  -4  -5  -2  438.36   16.00
  -4  -5  -2  454.15   16.20
   4  -5   2  469.15   18.50
   4  -5   2  451.75   19.00
   4  -5   2  487.15   18.40
   4   5   2  476.45   19.60
   4   5   2  460.35   21.20
   4   5   2  466.65   18.70
   4   5   2  470.65   19.00
   4   5   2  465.85   18.90
  -4   5  -2  431.36   18.70
   4   5   2  475.05   24.60
   4   5   2  490.65   22.10
   4   5   2  480.05   17.50
  -4   5  -2  459.85   17.70
  -5  -5  -2  726.63   24.10
   5  -5   2  767.82   26.00
  -5  -5  -2  775.22   24.70
  -5   5  -2  736.93   25.60
   5   5   2  742.43   26.30
  -5   5  -2  669.13   26.90
   5   5   2  748.63   30.10
   5   5   2  733.13   26.90
   5   5   2  767.32   29.80
   5   5   2  692.93   26.40
   5   5   2  724.53   32.20
   6  -5   2   39.10    3.20
  -6  -5  -2   37.00    2.40
  -6  -5  -2   40.00    3.20
   6  -5   2   44.90    4.10
  -6  -5  -2   40.10    3.00
   6   5   2   44.10    5.40
   6   5   2   32.90    4.60
   6   5   2   32.30    4.10
  -6   5  -2   36.90    3.80
  -6   5  -2   42.00    3.40
   6   5   2   38.50    4.30
   6   5   2   40.30    3.80
  -7  -5  -2   98.89    3.60
   7   5   2   98.29    5.40
   7  -6  -2   37.80    2.60
  -7   6   2   37.80    2.60
   7   6  -2   32.60    3.50
   7   6  -2   34.90    3.10
   7   6  -2   31.70    3.90
   6  -6  -2  148.39    7.40
  -6  -6   2  158.68    6.20
  -6  -6   2  148.19    6.80
  -6  -6   2  153.08    7.20
  -6   6   2  156.08    7.70
   6   6  -2  146.19   10.20
   6   6  -2  154.18    7.60
   6   6  -2  150.68    8.50
   6   6  -2  154.28    9.60
  -6   6   2  144.69    8.50
   5  -6  -2   68.29    5.90
   5  -6  -2   64.49    5.30
  -5  -6   2   68.59    4.40
   5  -6  -2   63.79    4.80
  -5  -6   2   59.09    4.20
  -5   6   2   65.89    5.30
   5   6  -2   60.69    4.60
   5   6  -2   59.19    5.20
   5   6  -2   58.59    8.90
  -5   6   2   59.69    5.50
   5   6  -2   62.69    6.80
   5   6  -2   59.59    7.10
   5   6  -2   59.89    5.70
   5   6  -2   57.99    4.70
   4  -6  -2  352.66   13.90
  -4  -6   2  383.76   35.10
   4  -6  -2  366.56   15.50
  -4  -6   2  370.96   16.00
   4  -6  -2  374.06   16.30
   4  -6  -2  371.76   14.50
  -4  -6   2  373.76   13.70
   4   6  -2  364.26   15.20
   4   6  -2  376.26   18.50
   4   6  -2  371.86   17.20
  -4   6   2  336.37   15.80
   4   6  -2  362.16   14.30
   4   6  -2  368.16   21.90
   4   6  -2  364.56   15.40
  -4   6   2  378.06   15.30
   4   6  -2  367.46   14.50
  -3  -6   2  938.71   28.80
   3  -6  -2  897.31   31.40
   3  -6  -2  887.81   52.39
   3  -6  -2  913.31   30.60
  -3   6   2  951.00   31.60
   3   6  -2  931.61   30.10
   3   6  -2  930.01   37.40
   3   6  -2  923.61   29.60
  -3   6   2  927.71   30.60
   3   6  -2  881.11   30.80
   3   6  -2  994.90   35.50
   3   6  -2  848.42   34.10
   2  -6  -2  440.16   29.40
  -2  -6   2  413.66   16.10
  -2  -6   2  422.06   13.80
   2  -6  -2  409.96   15.70
   2  -6  -2  426.86   15.40
   2   6  -2  389.86   29.40
  -2   6   2  446.96   15.90
  -2   6   2  424.56   21.80
   1  -6  -2  523.95   22.40
  -1  -6   2  517.25   17.30
   1  -6  -2  540.75   18.20
  -1   6   2  559.94   27.70
   1   6  -2  551.84   33.70
  -1   6   2  524.05   31.30
  -1   6   2  563.44   17.90
   0  -6  -2 4227.78  126.89
   0  -6  -2 4176.68  120.59
   0  -6   2 4053.09  121.99
   0   6  -2 4263.87  120.59
   0   6   2 4353.56  139.59
   1  -6   2 1486.85   46.60
   1  -6   2 1510.35   47.00
  -1  -6  -2 1556.34   50.59
  -1   6  -2 1516.55   45.60
  -1   6  -2 1475.15   62.39
   2  -6   2 1417.76   45.50
  -2  -6  -2 1482.35   52.79
   2  -6   2 1371.96   45.80
   2   6   2 1430.36   46.30
  -2   6  -2 1504.75   45.10
   2   6   2 1471.65   49.90
  -2   6  -2 1457.25   61.59
  -2   6  -2 1325.67   43.70
   2   6   2 1410.06   45.50
   3  -6   2  988.60   34.00
  -3  -6  -2  966.20   29.80
   3  -6   2 1004.00   32.60
  -3  -6  -2 1003.60   32.40
   3  -6   2  963.30   32.00
   3  -6   2  971.00   34.50
   3   6   2 1026.40   37.90
   3   6   2 1034.90   34.30
   3   6   2 1011.20   33.00
   3   6   2  981.10   33.60
   3   6   2  931.41   33.60
  -3   6  -2  992.50   33.30
   3   6   2  980.40   31.70
  -3   6  -2  921.41   47.60
  -3   6  -2  946.11   32.00
   3   6   2 1001.50   40.30
   3   6   2  954.90   35.90
   4  -6   2  112.89   10.20
   4  -6   2  107.19    8.00
   4  -6   2  103.59    7.10
   4  -6   2  110.89    7.10
  -4  -6  -2  112.69    5.60
  -4   6  -2   94.59    7.10
   4   6   2  119.89    8.50
   4   6   2  138.59   10.70
   4   6   2  124.59    8.00
   4   6   2  107.99   10.70
  -4   6  -2  116.29    7.50
   4   6   2  118.19    6.70
   4   6   2  120.19    9.60
   4   6   2  116.19    7.80
  -5  -6  -2   76.39    4.50
   5  -6   2   71.39    4.10
   5  -6   2   71.39    5.40
  -5  -6  -2   76.79    5.60
   5   6   2   79.89    7.80
  -5   6  -2   76.69    5.20
   5   6   2   80.79    8.20
   5   6   2   78.79    6.10
   5   6   2   79.49    7.80
  -5   6  -2   79.09    6.10
   5   6   2   78.09    6.70
   6  -6   2   26.00    2.40
   6  -6   2   24.80    2.60
  -6  -6  -2   28.50    2.30
  -6  -6  -2   26.40    2.30
   6   6   2   27.20    2.90
  -6   6  -2   28.40    2.70
   6   6   2   26.80    3.80
  -6   6  -2   27.50    2.90
   6   6   2   32.60    5.10
   7  -7  -2    9.00    1.40
   7   7  -2   11.70    3.00
   7   7  -2   10.80    2.00
  -7   7   2   18.50    2.70
  -6  -7   2  157.08    6.60
  -6  -7   2  153.28    6.60
   6  -7  -2  161.38   10.10
  -6   7   2  151.68    7.90
   6   7  -2  154.58   10.00
   6   7  -2  155.18    9.20
   6   7  -2  150.08    7.20
  -6   7   2  185.58   10.20
   5  -7  -2  126.09    7.00
  -5  -7   2  123.39    6.10
  -5  -7   2  122.79    6.10
   5  -7  -2  116.99    6.80
   5   7  -2  108.59   11.80
   5   7  -2  115.49    6.80
   5   7  -2  113.09    6.40
   5   7  -2  121.49    9.90
  -5   7   2  120.49    7.10
   5   7  -2  123.89    7.80
  -5   7   2  120.09    7.60
   5   7  -2  114.89    8.70
   4  -7  -2  338.07   13.30
  -4  -7   2  354.06   12.90
   4  -7  -2  335.77   14.80
   4  -7  -2  343.77   13.60
   4  -7  -2  339.67   15.60
  -4   7   2  337.97   14.30
  -4   7   2  324.37   14.70
   4   7  -2  312.97   15.90
   4   7  -2  344.77   21.50
   4   7  -2  352.76   18.40
   4   7  -2  339.37   13.70
   4   7  -2  332.07   14.80
  -4   7   2  319.87   28.60
   4   7  -2  328.07   13.40
  -3  -7   2 1052.79   33.50
   3  -7  -2 1014.10   32.40
   3  -7  -2 1019.60   33.00
  -3  -7   2 1031.10   32.00
   3  -7  -2 1051.79   34.40
   3  -7  -2 1037.80   59.79
   3  -7  -2 1041.80   35.20
  -3   7   2 1058.19   34.90
   3   7  -2  953.10   34.30
  -3   7   2 1051.99   34.70
   3   7  -2 1044.60   38.50
   3   7  -2 1040.50   33.10
  -3   7   2 1074.49   55.99
   3   7  -2  966.00   35.60
   3   7  -2  983.90   41.30
   3   7  -2 1016.60   33.40
   3   7  -2 1010.10   33.90
  -3   7   2 1050.89   33.70
   2  -7  -2  102.79    6.20
   2  -7  -2   98.19    5.10
   2  -7  -2   90.19    5.30
   2  -7  -2   88.09    7.20
   2  -7  -2  117.19   15.70
  -2  -7   2  117.09    5.40
   2   7  -2   78.99    6.20
   2   7  -2  115.09   16.60
  -2   7   2   96.89    6.90
  -2   7   2  102.19    8.30
   2   7  -2  108.59    8.30
   2   7  -2  104.99    6.00
   2   7  -2   91.49    8.30
  -2   7   2   98.79    5.70
  -2   7   2  102.39   14.90
   2   7  -2  103.39    9.00
   1  -7  -2  693.13   23.00
   1  -7  -2  697.93   23.50
   1  -7  -2  680.23   38.60
  -1  -7   2  702.83   22.90
  -1   7   2  676.53   24.90
  -1   7   2  719.13   35.70
   1   7  -2  735.43   25.90
  -1   7   2  718.63   22.00
  -1   7   2  729.63   40.60
   1   7  -2  704.93   42.10
   1   7  -2  736.03   24.20
  -1   7   2  737.23   26.50
   0  -7  -2 2493.65   82.19
   0  -7  -2 2570.54   76.09
   0  -7   2 2585.84   77.69
   0   7   2 2541.35   97.39
   0   7   2 2536.25   81.09
   0   7   2 2696.13   79.79
   0   7  -2 2607.34   80.29
   0   7  -2 2473.95  100.59
   0   7   2 2998.10   90.89
   1  -7   2  116.89    6.80
   1  -7   2  122.99    7.10
  -1  -7  -2  110.09    4.60
   1   7   2  118.59    7.20
   1   7   2  116.49   10.40
  -1   7  -2   96.19   13.50
  -1   7  -2  133.09    6.60
   1   7   2  121.49    7.80
  -1   7  -2  123.59    5.80
  -1   7  -2  105.49    7.90
   2  -7   2  949.40   31.60
   2  -7   2  927.51   31.10
   2  -7   2  946.21   33.40
   2   7   2  949.71   35.20
  -2   7  -2  920.91   32.50
   2   7   2  955.90   32.70
   2   7   2  985.10   33.70
  -2   7  -2  960.20   31.50
   2   7   2 1010.10   34.00
  -2   7  -2  925.71   30.70
   2   7   2 1026.10   40.00
   2   7   2 1011.90   33.30
   2   7   2  924.51   32.70
   2   7   2  932.31   30.70
   2   7   2  993.30   37.60
  -2   7  -2 1017.20   50.59
   3  -7   2  374.96   17.50
   3  -7   2  423.16   17.60
  -3  -7  -2  393.46   13.20
   3   7   2  389.76   15.00
   3   7   2  393.86   26.10
   3   7   2  414.06   22.50
  -3   7  -2  385.16   16.10
   3   7   2  393.66   16.20
  -3   7  -2  420.86   20.00
  -3   7  -2  394.16   28.40
   3   7   2  426.56   19.40
   4  -7   2  399.96   15.50
   4  -7   2  382.56   16.60
   4  -7   2  382.06   17.20
  -4  -7  -2  384.86   13.50
   4  -7   2  380.86   15.90
   4   7   2  378.66   17.00
  -4   7  -2  401.06   16.40
   4   7   2  395.16   19.20
   4   7   2  388.36   16.70
   4   7   2  382.96   14.80
  -4   7  -2  390.16   15.20
   4   7   2  402.26   20.60
   4   7   2  377.76   21.00
   5  -7   2   77.49    5.40
  -5  -7  -2   75.69    4.20
   5   7   2   75.29    6.30
   5   7   2   74.59    7.10
   5   7   2   79.49    5.90
  -5   7  -2   81.79    5.60
   5   7   2   76.19    7.50
  -5   7  -2   80.19    5.00
   5   7   2   72.59    7.20
   6  -7   2   89.49    4.40
  -6   7  -2   99.49    4.70
   6   7   2  100.79    6.60
   6  -8  -2  158.38    6.80
  -6   8   2  150.48    7.00
   6   8  -2  130.29    8.70
   6   8  -2  159.08    7.80
   6   8  -2  150.88    6.50
  -6   8   2  174.58    6.80
   6   8  -2  158.48    7.50
   5  -8  -2  427.96   16.90
  -5  -8   2  454.55   15.20
   5  -8  -2  449.06   15.90
   5  -8  -2  457.15   16.70
  -5   8   2  463.85   17.10
   5   8  -2  447.76   16.50
   5   8  -2  441.46   18.40
   5   8  -2  455.55   21.00
   5   8  -2  454.05   17.70
   5   8  -2  457.75   16.00
  -5   8   2  441.76   16.40
   4  -8  -2   85.79    6.80
  -4  -8   2   89.19    5.00
   4  -8  -2   97.29    7.00
   4  -8  -2   91.79    6.00
   4  -8  -2   97.49    6.00
   4   8  -2   92.69   10.50
   4   8  -2   87.09    5.70
  -4   8   2   90.29    5.90
  -4   8   2   88.09    6.00
   4   8  -2   84.39    9.20
   4   8  -2   82.49    6.50
   4   8  -2  101.39    9.00
   4   8  -2   94.49    5.70
   3  -8  -2  744.43   25.00
  -3  -8   2  743.33   24.40
   3  -8  -2  725.23   25.40
   3  -8  -2  748.93   27.70
  -3   8   2  734.43   25.50
  -3   8   2  745.43   27.10
   3   8  -2  810.92   26.10
   3   8  -2  766.42   31.10
   3   8  -2  731.43   26.30
  -3   8   2  757.72   25.80
   3   8  -2  746.83   25.50
  -3   8   2  763.32   48.00
   3   8  -2  783.22   34.40
   2  -8  -2  338.27   12.80
   2  -8  -2  355.66   14.80
   2  -8  -2  310.17   29.40
   2  -8  -2  329.47   13.10
  -2   8   2  333.47   13.20
  -2   8   2  354.46   15.90
   2   8  -2  376.56   13.60
   2   8  -2  365.86   19.90
   2   8  -2  340.57   31.10
   2   8  -2  358.86   14.10
   2   8  -2  369.26   18.00
  -2   8   2  321.47   28.60
  -2   8   2  362.26   12.90
   2   8  -2  364.96   16.50
   1  -8  -2  267.87   11.50
   1  -8  -2  272.97   11.30
  -1  -8   2  270.87   11.10
   1   8  -2  266.67   26.40
  -1   8   2  292.17   13.90
   1   8  -2  285.67   14.10
  -1   8   2  293.17   10.60
  -1   8   2  271.27   24.90
   1   8  -2  261.17   11.70
   0  -8   2  350.46   14.30
   0  -8  -2  377.06   13.40
   0  -8   2  369.76   14.60
   0   8   2  366.96   15.50
   0   8  -2  388.06   31.10
   0   8   2  364.36   20.50
   0   8  -2  366.86   14.60
   0   8   2  375.36   16.80
   0   8   2  355.66   36.60
   0   8  -2  390.06   17.00
   1  -8   2  879.71   30.80
   1  -8   2  845.92   28.90
  -1  -8  -2  901.71   27.20
   1  -8   2  912.01   30.40
   1  -8   2  833.42   29.40
   1   8   2  907.41   32.20
   1   8   2  916.71   37.90
  -1   8  -2  859.31   27.70
   1   8   2  897.81   30.90
   1   8   2  873.91   32.20
  -1   8  -2  932.91   31.90
  -1   8  -2  900.71   29.90
  -1   8  -2  903.61   27.10
  -1   8  -2  858.61   50.09
   2  -8   2  914.71   32.20
   2  -8   2  827.62   29.80
   2  -8   2  868.41   29.50
   2  -8   2  887.31   31.40
  -2   8  -2  907.41   28.70
   2   8   2  911.41   31.00
   2   8   2  827.02   30.60
  -2   8  -2  860.31   30.90
   2   8   2  905.51   31.70
   2   8   2  920.71   33.70
  -2   8  -2  907.61   29.00
   2   8   2  932.31   38.30
   3  -8   2   72.39    5.60
   3  -8   2   76.19    6.60
   3  -8   2   75.79    6.50
   3  -8   2   76.19    5.80
   3   8   2   75.89    8.80
   3   8   2   75.59    5.70
   3   8   2   71.69    6.00
   3   8   2   78.69    4.90
   3   8   2   81.59    7.80
  -3   8  -2   75.79    5.20
   3   8   2   75.19    8.70
  -3   8  -2   70.19    4.90
   3   8   2   73.59    6.60
   4  -8   2   40.00    4.80
   4  -8   2   43.30    4.30
   4  -8   2   49.30    5.20
   4  -8   2   51.79    5.00
  -4   8  -2   39.00    3.60
   4   8   2   39.70    3.30
   4   8   2   32.00    5.60
   4   8   2   45.10    7.50
   4   8   2   44.70    5.90
  -4   8  -2   37.10    3.70
   4   8   2   41.80    6.10
   5  -8   2   66.39    4.80
   5  -8   2   56.89    4.10
  -5   8  -2   63.59    4.10
   5   8   2   43.10    6.60
  -5   8  -2   60.19    4.20
   5   8   2   70.09    8.10
   6  -8   2   33.70    2.30
  -6   8  -2   46.80    2.50
  -6   8  -2   41.40    2.40
   6   8   2   43.60    3.70
  -6   9   2   76.59    3.20
   5  -9  -2   15.70    2.60
   5  -9  -2   14.20    2.40
  -5   9   2   17.50    2.30
   5   9  -2   11.40    2.50
  -5   9   2    9.90    1.80
   5   9  -2   16.90    2.40
   5   9  -2   11.30    3.10
   5   9  -2   13.70    4.00
   4  -9  -2  366.36   14.30
   4  -9  -2  387.56   14.30
   4  -9  -2  357.76   16.10
   4   9  -2  369.86   14.00
   4   9  -2  376.16   15.00
   4   9  -2  368.96   13.90
  -4   9   2  362.06   13.60
  -4   9   2  350.56   13.50
   4   9  -2  359.06   18.60
   4   9  -2  359.46   21.20
   3  -9  -2   -1.10    1.10
   3  -9  -2    3.00    1.60
   3  -9  -2    3.50    2.00
   3  -9  -2    3.30    1.50
   3   9  -2    5.10    1.90
  -3   9   2    2.50    1.80
   3   9  -2    2.90    3.00
   3   9  -2    1.50    1.10
  -3   9   2    3.20    1.40
   3   9  -2    3.60    2.90
   3   9  -2    7.70    2.60
   2  -9  -2  499.85   18.40
   2  -9  -2  532.05   20.60
   2  -9  -2  513.35   18.00
  -2  -9   2  528.85   18.50
   2  -9  -2  563.44   40.50
   2  -9  -2  529.35   19.70
   2   9  -2  551.54   22.00
   2   9  -2  511.25   25.20
  -2   9   2  528.45   21.30
  -2   9   2  479.55   37.50
  -2   9   2  505.45   18.70
   2   9  -2  522.85   23.70
   2   9  -2  546.85   19.40
  -2   9   2  510.95   17.40
   2   9  -2  527.65   18.50
   1  -9  -2 2403.56   71.49
   1  -9  -2 2358.26   71.89
   1  -9  -2 2109.29   96.19
  -1  -9   2 2392.86   71.49
  -1   9   2 2365.16   70.89
  -1   9   2 2416.26   74.69
   1   9  -2 2285.47  102.59
   1   9  -2 2520.85   74.39
  -1   9   2 2358.06  101.19
   1   9  -2 2386.76   71.79
   0  -9   2   91.19    5.90
   0  -9   2   87.59    6.00
   0  -9  -2   97.49    5.40
   0  -9  -2   75.29    5.10
   0   9   2   89.89    7.30
   0   9   2   90.29    5.40
   0   9  -2   85.59    5.90
   0   9  -2  101.69    9.50
   0   9  -2   64.59   15.00
  -1  -9  -2  278.77   10.10
   1  -9   2  257.17   12.20
   1  -9   2  246.18   11.30
   1  -9   2  265.27   12.70
   1   9   2  233.58   14.30
   1   9   2  274.97   13.50
  -1   9  -2  258.27   11.60
  -1   9  -2  241.38    9.10
   1   9   2  264.47   17.30
  -1   9  -2  258.77   36.00
  -1   9  -2  260.57   14.00
   2  -9   2  624.14   24.30
   2  -9   2  633.34   22.50
   2  -9   2  644.54   22.90
   2  -9   2  648.54   25.10
   2   9   2  637.24   25.60
   2   9   2  624.64   29.60
  -2   9  -2  641.74   20.10
  -2   9  -2  637.14   22.90
   2   9   2  640.34   24.40
  -2   9  -2  624.24   20.90
   3  -9   2   47.20    7.60
   3  -9   2   64.29    5.90
   3  -9   2   53.49    5.80
   3   9   2   54.99    7.70
   3   9   2   52.29    7.20
   3   9   2   53.69    3.60
  -3   9  -2   53.09    3.70
  -3   9  -2   57.99    5.70
   3   9   2   43.50    5.70
   4  -9   2   33.50    4.40
   4  -9   2   37.50    3.60
   4  -9   2   35.90    4.00
   4  -9   2   38.70    4.30
  -4   9  -2   31.40    2.90
   4   9   2   29.30    6.90
  -4   9  -2   33.50    3.00
   4   9   2   34.20    5.40
   5  -9   2   51.59    3.70
  -5   9  -2   44.70    3.20
   5   9   2   53.29    4.80
  -5   9  -2   52.69    3.00
   5 -10  -2   10.80    1.90
   5 -10  -2   10.00    1.50
  -5  10   2   10.30    1.10
  -5  10   2    7.90    1.30
   5  10  -2   13.50    1.80
   4 -10  -2  181.48    9.90
   4 -10  -2  198.88    8.90
   4 -10  -2  204.88    8.90
   4 -10  -2  196.28    9.90
   4  10  -2  206.08    8.90
  -4  10   2  190.58    7.50
  -4  10   2  194.48    8.10
   4  10  -2  200.88    8.70
   4  10  -2  212.28    9.00
   3 -10  -2   64.69    5.60
   3 -10  -2   74.19    4.90
   3 -10  -2   71.49    4.90
   3 -10  -2   73.09    6.20
  -3  10   2   73.19    4.50
  -3  10   2   72.69    3.70
   3  10  -2   71.49    4.60
   3  10  -2   68.49    4.70
   2 -10  -2  351.86   14.80
   2 -10  -2  349.37   15.50
   2 -10  -2  343.07   13.30
  -2 -10   2  344.17   13.40
   2  10  -2  360.06   14.10
   2  10  -2  393.16   17.50
   2  10  -2  343.77   14.10
  -2  10   2  362.76   15.90
  -2  10   2  348.77   13.40
   1 -10  -2  908.41   30.10
   1 -10  -2  879.91   28.60
   1 -10  -2  934.01   31.10
  -1 -10   2  874.21   30.40
  -1 -10   2  915.01   30.40
   1  10  -2  892.51   30.20
  -1  10   2  904.51   32.90
  -1  10   2  930.51   29.30
   1  10  -2  961.30   33.30
   1  10  -2  874.01   28.80
   0 -10   2  440.06   17.50
   0 -10  -2  424.26   16.00
   0 -10  -2  441.96   16.40
   0 -10   2  451.35   17.90
   0  10  -2  436.66   17.10
   0  10  -2  435.86   15.30
   0  10  -2  478.75   20.50
   0  10   2  443.06   19.20
   1 -10   2  289.97   13.50
   1 -10   2  294.27   14.00
   1 -10   2  279.17   12.00
  -1 -10  -2  299.57   11.20
  -1  10  -2  301.37   15.70
  -1  10  -2  288.57   12.50
   1  10   2  295.77   14.40
   2 -10   2   64.99    6.00
   2 -10   2   68.69    5.20
   2 -10   2   74.89    5.20
   2 -10   2   65.59    5.80
   2  10   2   70.29    6.40
  -2  10  -2   69.99    3.40
  -2  10  -2   67.69    5.00
   2  10   2   68.69    8.00
   3 -10   2   19.80    3.70
   3 -10   2   17.90    3.20
   3 -10   2   17.60    2.90
   3 -10   2   18.00    3.50
  -3  10  -2   17.50    1.80
  -3  10  -2   21.20    2.70
   3  10   2   11.80    4.90
   3  10   2   21.00    4.60
   4 -10   2    3.50    1.60
   4 -10   2    3.20    1.50
   4 -10   2    4.50    1.80
  -4  10  -2    4.30    1.40
   4  10   2   -0.80    2.40
  -4  10  -2    2.40    0.90
   5 -10   2  266.17    8.80
  -5  10  -2  218.18    8.30
   4 -11  -2  117.79    6.40
   4 -11  -2  126.19    5.80
   4 -11  -2  116.29    5.50
   4  11  -2  109.79    4.80
   4  11  -2  116.09    4.80
   3 -11  -2  149.59    7.20
   3 -11  -2  145.09    6.70
   3 -11  -2  151.98    8.10
   3 -11  -2  140.29    8.10
   3  11  -2  140.59    6.40
  -3  11   2  142.09    5.90
   3  11  -2  146.39    6.20
  -3  11   2  131.69    7.50
   2 -11  -2  284.27   11.00
   2 -11  -2  296.27   12.50
   2 -11  -2  288.87   11.10
   2  11  -2  277.67   11.30
  -2  11   2  287.97   10.50
  -2  11   2  267.97   12.90
   2  11  -2  282.37   11.20
  -1 -11   2  131.99    8.50
  -1 -11   2  142.09    7.80
   1 -11  -2  140.19    7.50
   1 -11  -2  158.38    8.30
  -1  11   2  147.29    9.30
   1  11  -2  136.19    6.20
   1  11  -2  145.69    7.30
   0 -11  -2  138.19    6.90
   0 -11   2  126.09    7.00
   0 -11   2  136.59    7.80
   0 -11  -2  140.09    7.20
   0 -11   2  144.89    8.00
   0  11   2  133.09    9.00
   0  11  -2  132.29    7.10
   1 -11   2  202.28    9.20
   1 -11   2  208.68   10.60
   1 -11   2  202.88   10.40
   1  11   2  213.08   11.30
  -1  11  -2  194.78    9.30
   2 -11   2  335.07   14.80
   2 -11   2  344.57   15.30
   2 -11   2  345.17   13.60
   2 -11   2  371.76   13.60
  -2  11  -2  339.77   13.40
   2  11   2  359.26   15.50
   3 -11   2   63.19    5.50
   3 -11   2   70.59    4.50
   3 -11   2   71.69    5.00
   3 -11   2   77.19    5.50
  -3  11  -2   69.79    4.20
   4 -11   2  129.69    5.60
   4 -11   2  124.79    5.10
  -4  11  -2  131.29    5.30
   3 -12  -2  164.98    6.80
   3  12  -2  147.59    5.70
   2 -12  -2   57.89    4.30
   2 -12  -2   56.69    4.50
   2 -12  -2   55.79    3.80
   2  12  -2   53.59    3.30
  -2  12   2   52.89    6.00
   1 -12  -2   62.99    4.70
   1 -12  -2   64.09    3.80
   1 -12  -2   59.19    4.30
   1  12  -2   49.40    3.60
   0 -12  -2   32.60    3.20
   0 -12  -2   38.40    3.50
   0 -12   2   43.60    4.00
   0 -12   2   33.10    3.60
   0 -12   2   45.10    4.40
   0  12  -2   40.60    3.10
   1 -12   2   19.60    2.80
   1 -12   2   12.70    2.70
  -1  12  -2   21.40    2.30
   2 -12   2   97.89    6.10
   2 -12   2  102.29    5.70
   2  12   2  123.49    8.50
  -2  12  -2  102.19    5.10
  -3  12  -2   56.69    3.00
   1  13  -2   32.80    2.20
  -1  13  -2   13.80    1.30
   8   0  -3   29.90    2.20
   8   0  -3   29.10    2.80
   7   0  -3  105.79    5.80
   7   0  -3  117.59    7.40
  -7   0   3  107.39    5.70
  -7   0   3  109.39    6.20
  -7   0   3  110.49    5.00
  -7   0   3  114.59    5.60
   7   0  -3  108.39    7.30
   7   0  -3  111.69    6.40
  -6   0   3  105.19    7.90
   6   0  -3  116.59    8.00
  -6   0   3  114.39    6.30
   6   0  -3  105.29    6.80
   6   0  -3  108.49    6.50
  -6   0   3  105.09    5.40
  -6   0   3  111.79    6.50
  -5   0   3  297.27   12.00
   5   0  -3  308.77   11.80
  -5   0   3  284.37   13.80
  -5   0   3  282.47   10.90
  -5   0   3  294.57   12.60
   5   0  -3  267.67   11.50
  -5   0   3  269.17   11.60
  -5   0   3  312.57   19.10
  -4   0   3  685.13   25.90
  -4   0   3  741.13   30.90
  -4   0   3  719.33   24.30
  -4   0   3  727.73   23.80
  -4   0   3  691.53   48.00
  -3   0   3 2390.76   72.99
  -3   0   3 2570.34   98.69
   2   0  -3 1874.61   60.89
  -2   0   3 1770.12   69.99
  -2   0   3 1822.92   54.09
   1   0  -3 2403.66   71.89
  -2   0  -3 4556.04  138.59
  -2   0  -3 4538.05  136.09
  -2   0  -3 4609.64  131.29
  -3   0  -3  258.57   14.80
  -3   0  -3  254.77    9.80
  -3   0  -3  262.97   11.20
  -3   0  -3  257.67   10.20
  -3   0  -3  282.77   24.50
  -4   0  -3  165.48   12.50
   4   0   3  138.99   11.20
  -4   0  -3  156.58    7.50
   4   0   3  167.68    8.70
   4   0   3  156.98    9.10
  -4   0  -3  154.78    7.90
  -4   0  -3  143.29    8.50
  -4   0  -3  150.28    6.40
  -5   0  -3   34.50    3.40
   5   0   3   32.00    5.40
  -5   0  -3   19.50    6.00
   5   0   3   33.90    4.80
  -5   0  -3   31.60    2.80
   5   0   3   33.90    3.70
   5   0   3   29.80    4.40
  -5   0  -3   33.60    3.70
  -5   0  -3   31.30    3.40
  -6   0  -3  586.94   20.50
  -6   0  -3  587.44   18.60
   6   0   3  548.85   20.50
   6   0   3  573.44   21.30
   6   0   3  580.74   22.30
   7   0   3   26.90    2.50
   7   0   3   20.90    3.00
  -7   0  -3   26.60    1.60
  -7   0  -3   20.00    1.80
   7   0   3   22.90    2.10
   8  -1  -3   15.60    1.70
  -8  -1   3   18.30    1.20
   8  -1  -3   15.90    2.10
   8   1  -3   18.40    2.40
   8   1  -3   19.40    1.80
   7  -1  -3  161.78    8.30
  -7  -1   3  190.28    8.70
   7  -1  -3  175.38    9.30
  -7  -1   3  187.98    7.70
   7  -1  -3  175.48    9.40
  -7  -1   3  185.58    8.20
  -7  -1   3  182.28    7.10
   7   1  -3  183.58    9.90
  -7   1   3  159.28    9.20
   7   1  -3  190.18   11.30
  -7   1   3  180.08    6.80
  -7   1   3  170.08    8.20
   7   1  -3  164.88    9.70
  -7   1   3  182.28    7.60
   7   1  -3  184.58    8.80
   6  -1  -3  436.66   16.90
  -6  -1   3  445.06   16.70
  -6  -1   3  432.46   15.20
  -6  -1   3  447.66   19.30
   6  -1  -3  447.26   18.50
   6  -1  -3  424.96   16.20
  -6  -1   3  441.16   16.10
  -6   1   3  449.76   16.50
  -6   1   3  445.96   16.20
  -6   1   3  424.26   15.00
   6   1  -3  431.06   16.80
  -6   1   3  452.55   19.50
   6   1  -3  428.06   18.40
   6   1  -3  442.46   17.30
   6   1  -3  434.66   19.10
  -6   1   3  418.46   17.50
   5  -1  -3  182.48    7.80
  -5  -1   3  173.18    9.00
  -5  -1   3  182.38    8.70
  -5  -1   3  163.58    7.50
   5  -1  -3  173.98    8.20
  -5  -1   3  168.78    8.10
  -5  -1   3  176.18   13.70
  -5   1   3  173.38    8.90
   5   1  -3  176.48    8.30
  -5   1   3  175.68    7.40
  -5   1   3  170.78    8.20
   5   1  -3  171.48    8.60
   5   1  -3  167.58   12.90
  -5   1   3  199.58   16.20
   5   1  -3  170.18    8.70
  -5   1   3  175.18    8.40
  -5   1   3  174.38   10.20
  -4  -1   3  594.74   22.60
  -4  -1   3  613.44   20.90
  -4  -1   3  511.85   41.40
  -4  -1   3  606.94   20.40
  -4  -1   3  609.64   26.80
  -4   1   3  599.34   22.80
  -4   1   3  595.94   27.10
  -4   1   3  605.34   20.90
  -4   1   3  587.24   20.10
  -3  -1   3 5899.71  166.88
  -3  -1   3 6061.79  194.68
  -3   1   3 5653.93  166.78
  -3   1   3 5429.26  194.68
  -3   1   3 5979.10  169.18
  -3   1   3 5742.33  173.08
  -2  -1   3 5154.98  153.88
  -2   1   3 5314.07  173.28
  -2   1   3 5636.94  154.68
  -2   1   3 5316.17  158.98
   2   1  -3 5400.16  160.98
   0  -1   3 3863.91  115.99
   0  -1  -3 3778.42  114.39
   0   1  -3 3876.11  114.69
   0   1   3 4130.99  116.59
  -1  -1  -3  302.47   12.60
  -1  -1  -3  290.47   14.00
  -1   1  -3  297.37   13.00
  -1   1  -3  298.67   13.70
  -2  -1  -3 2121.79   70.89
  -2  -1  -3 2154.08   67.29
  -2  -1  -3 2133.79   62.89
  -2   1  -3 2116.19   63.09
  -2   1  -3 2209.38   68.49
  -2   1  -3 2173.18   70.39
  -3  -1  -3   35.20    2.90
  -3  -1  -3   45.50    7.70
  -3  -1  -3   28.10    5.00
  -3  -1  -3   39.90    4.70
  -3  -1  -3   38.90    2.80
  -3   1  -3   34.10    4.80
  -3   1  -3   41.40    3.70
  -3   1  -3   37.90    2.90
  -3   1  -3   36.10    6.20
  -3   1  -3   32.50    2.90
  -4  -1  -3  871.71   36.90
  -4  -1  -3  967.00   30.00
   4  -1   3  883.11   29.80
   4  -1   3  892.31   31.70
  -4  -1  -3  916.81   29.50
  -4   1  -3  931.01   29.60
  -4   1  -3  916.61   38.50
  -4   1  -3  904.91   28.20
   4   1   3  909.41   30.30
  -4   1  -3  931.51   30.10
  -4   1  -3  910.41   31.80
   4   1   3  946.21   31.30
  -5  -1  -3  161.08    7.10
   5  -1   3  164.18   10.20
  -5  -1  -3  173.38    8.30
  -5  -1  -3  168.28   13.80
   5  -1   3  168.28    8.70
  -5  -1  -3  168.28    8.60
   5   1   3  158.88    9.00
  -5   1  -3  175.18    8.70
  -5   1  -3  173.08    8.20
  -5   1  -3  168.58   14.80
   5   1   3  177.68    9.80
  -5   1  -3  171.08    7.10
   5   1   3  176.38   11.10
   5   1   3  180.38    9.20
   5   1   3  158.68    9.50
  -5   1  -3  158.58    9.40
  -6  -1  -3  136.89    7.30
   6  -1   3  134.79    7.20
  -6  -1  -3  143.99    6.00
   6  -1   3  137.89    7.90
  -6   1  -3  119.29    9.20
  -6   1  -3  136.89    5.80
   6   1   3  135.99   11.30
   6   1   3  132.99    7.40
   6   1   3  144.79    8.90
   6   1   3  143.39    8.10
  -6   1  -3  141.19    6.70
   7  -1   3   94.09    4.50
   7  -1   3   93.49    6.40
  -7  -1  -3  103.99    4.00
   7  -1   3  104.99    5.20
  -7  -1  -3   95.59    4.40
  -7   1  -3   96.39    4.00
   7   1   3  101.89    5.20
   7   1   3  104.79    4.80
  -8  -2   3    2.80    0.60
   8  -2  -3    3.80    1.10
   8   2  -3    4.20    1.70
   7  -2  -3    6.20    2.20
   7  -2  -3    4.20    1.70
   7  -2  -3    5.40    1.90
  -7  -2   3    3.90    1.20
  -7  -2   3    2.80    1.30
  -7  -2   3    2.30    1.20
   7   2  -3    4.80    2.20
   7   2  -3    4.00    2.10
  -7   2   3    4.30    0.90
   7   2  -3    4.90    1.90
  -7   2   3    2.40    1.80
   7   2  -3    4.30    1.60
  -7   2   3    4.80    1.30
  -7   2   3    2.70    1.60
  -6  -2   3  223.18   10.10
  -6  -2   3  222.68   10.70
  -6  -2   3  221.28    8.90
   6  -2  -3  217.68    9.00
  -6  -2   3  214.68    9.30
  -6   2   3  203.88    9.40
  -6   2   3  204.78   10.60
  -6   2   3  201.18   10.00
  -6   2   3  211.88    8.40
   6   2  -3  221.68   11.90
   6   2  -3  218.48    9.70
  -6   2   3  216.28    9.40
   6   2  -3  214.48   10.50
   6   2  -3  228.88   10.70
   6   2  -3  221.48   12.50
  -6   2   3  216.38   11.90
  -5  -2   3 1331.57   41.20
  -5  -2   3 1316.87   41.70
  -5  -2   3 1363.56   43.30
   5  -2  -3 1285.27   41.30
  -5  -2   3 1383.56   42.60
  -5  -2   3 1292.47   76.89
  -5  -2   3 1371.56   51.29
   5  -2  -3 1286.37   41.40
  -5   2   3 1356.96   40.50
  -5   2   3 1339.97   42.90
  -5   2   3 1368.06   42.00
   5   2  -3 1309.87   42.40
   5   2  -3 1372.66   42.40
  -5   2   3 1340.97   53.99
   5   2  -3 1342.67   42.90
   5   2  -3 1363.66   45.60
  -5   2   3 1318.47   43.70
   5   2  -3 1416.96   51.69
  -5   2   3 1352.26   45.60
  -5   2   3 1352.26   42.00
  -4  -2   3 2262.57  100.69
  -4  -2   3 2324.47   68.89
  -4  -2   3 2299.87   68.39
  -4  -2   3 2287.17   75.69
  -4   2   3 2253.37   67.89
  -4   2   3 2268.77   77.09
  -4   2   3 2335.37   71.39
  -4   2   3 2241.98   68.69
   3  -2  -3  662.83   34.80
   3  -2  -3  679.53   22.10
  -3  -2   3  657.63   21.90
  -3   2   3  624.74   26.90
  -3   2   3  659.43   21.70
  -3   2   3  679.73   23.80
   2  -2  -3  588.64   18.90
  -2  -2   3  561.94   18.80
   2  -2  -3  575.74   27.20
   2   2  -3  579.94   26.60
  -2   2   3  583.84   25.20
  -2   2   3  587.34   22.70
   1  -2  -3 4795.12  138.49
  -1   2   3 4559.64  145.69
  -1   2   3 4758.52  138.79
   0  -2  -3  329.47   13.10
   0  -2   3  324.97   14.00
   0   2  -3  337.97   13.30
   1  -2   3 7659.13  225.38
  -1  -2  -3 7786.42  226.88
  -1  -2  -3 7735.43  229.88
  -1   2  -3 8314.37  228.68
  -2  -2  -3  213.38   11.00
  -2  -2  -3  221.08    8.20
  -2  -2  -3  231.78   13.80
   2  -2   3  230.08    9.70
  -2   2  -3  231.68   12.80
  -2   2  -3  228.08    8.60
  -2   2  -3  236.28    9.70
  -2   2  -3  213.58   11.90
  -3  -2  -3  623.84   20.50
  -3  -2  -3  698.63   20.90
  -3  -2  -3  620.04   25.50
  -3  -2  -3  556.74   28.90
  -3   2  -3  638.94   20.60
  -3   2  -3  612.54   27.20
  -3   2  -3  595.84   27.80
  -3   2  -3  665.33   22.70
  -3   2  -3  626.14   21.00
  -4  -2  -3 1298.57   49.20
  -4  -2  -3 1344.37   41.00
   4  -2   3 1343.07   42.10
  -4  -2  -3 1332.87   41.50
   4   2   3 1314.47   43.30
  -4   2  -3 1301.47   50.99
   4   2   3 1339.77   42.50
  -4   2  -3 1302.97   39.60
  -4   2  -3 1347.37   41.10
  -4   2  -3 1358.56   43.80
   4   2   3 1338.87   60.39
   4   2   3 1283.37   44.80
  -4   2  -3 1312.87   41.70
   4   2   3 1289.77   45.00
   4   2   3 1348.07   43.30
  -5  -2  -3   72.99    5.10
   5  -2   3   64.39    4.80
  -5  -2  -3   62.39    3.90
  -5  -2  -3   66.59    4.60
   5  -2   3   64.29    5.00
  -5  -2  -3   78.19    8.80
   5   2   3   68.29    8.90
  -5   2  -3   64.29    4.70
   5   2   3   67.09    7.20
  -5   2  -3   65.59    3.80
   5   2   3   71.09    5.90
  -5   2  -3   62.39    5.00
  -5   2  -3   60.99    5.60
   5   2   3   62.79    5.40
   5   2   3   70.89    6.40
  -5   2  -3   61.89    9.80
   5   2   3   62.29    5.40
  -5   2  -3   67.79    4.50
   6  -2   3   16.00    2.50
   6  -2   3   13.50    2.70
  -6  -2  -3   10.70    1.70
  -6  -2  -3   14.10    2.40
  -6  -2  -3   10.90    2.20
   6   2   3   15.10    3.80
  -6   2  -3   13.00    2.50
  -6   2  -3   12.80    1.50
   6   2   3   14.90    2.90
   6   2   3   15.70    4.60
  -6   2  -3   15.60    3.00
  -6   2  -3    9.90    2.50
  -6   2  -3    9.20    1.70
   6   2   3   15.30    3.00
  -7  -2  -3   13.80    1.60
   7  -2   3   13.90    2.40
   7  -2   3   11.00    1.60
  -7  -2  -3   14.50    1.30
   7  -2   3   11.50    2.70
   7   2   3   16.30    3.10
   8  -3  -3   38.80    2.30
   7  -3  -3   34.20    3.40
   7  -3  -3   34.80    3.40
  -7  -3   3   35.20    3.10
   7  -3  -3   36.40    3.70
  -7  -3   3   35.20    3.00
  -7  -3   3   33.20    3.10
  -7   3   3   30.50    3.40
   7   3  -3   31.90    4.30
   7   3  -3   29.20    4.50
   7   3  -3   30.10    4.10
  -7   3   3   36.20    3.30
  -6  -3   3  481.05   16.60
  -6  -3   3  464.95   17.70
   6  -3  -3  536.35   19.80
  -6  -3   3  501.85   18.80
  -6   3   3  473.05   16.60
  -6   3   3  448.56   18.70
   6   3  -3  495.75   26.30
  -6   3   3  510.55   22.60
  -6   3   3  490.05   17.50
  -6   3   3  473.55   15.60
   6   3  -3  471.45   17.80
   6   3  -3  468.75   21.10
   6   3  -3  483.65   20.30
   6   3  -3  487.45   18.90
   6   3  -3  515.25   19.00
   5  -3  -3  791.12   26.30
  -5  -3   3  823.22   34.30
  -5  -3   3  807.12   27.50
  -5  -3   3  754.92   25.60
  -5  -3   3  756.72   26.00
  -5  -3   3  811.82   27.00
  -5  -3   3  833.62   59.59
   5   3  -3  804.52   27.30
  -5   3   3  783.62   24.80
  -5   3   3  795.02   26.90
   5   3  -3  813.82   27.00
   5   3  -3  806.22   35.50
  -5   3   3  825.82   26.50
  -5   3   3  792.52   28.30
   5   3  -3  788.82   30.20
  -5   3   3  798.12   29.90
  -5   3   3  814.42   26.10
  -5   3   3  741.93   37.30
   5   3  -3  811.62   27.70
   5   3  -3  781.22   28.90
  -4  -3   3  190.48    8.80
   4  -3  -3  190.38    7.90
  -4  -3   3  212.18   13.10
   4  -3  -3  198.88    9.10
   4  -3  -3  189.58    8.30
   4  -3  -3  199.28    9.70
  -4  -3   3  187.48   22.80
  -4  -3   3  209.18    9.20
  -4   3   3  197.08   13.90
   4   3  -3  187.38    8.50
   4   3  -3  200.48   10.70
  -4   3   3  189.08   10.60
   4   3  -3  197.48    8.80
   4   3  -3  203.38   13.30
  -4   3   3  192.88    8.50
   4   3  -3  199.38    8.80
  -4   3   3  183.48    7.20
  -4   3   3  194.78    8.20
  -4   3   3  190.28    8.80
   3  -3  -3   28.30    3.00
  -3   3   3   32.10    4.30
  -3   3   3   33.40    2.80
  -3   3   3   31.00    3.50
   2  -3  -3  215.38    8.50
   2  -3  -3  212.68   15.80
  -2   3   3  195.98   11.60
   2   3  -3  204.08   15.40
  -2   3   3  218.68   11.70
   1  -3  -3 3691.13  111.79
   1  -3  -3 3740.43  107.39
  -1  -3   3 4101.09  108.79
  -1   3   3 3203.48  119.79
  -1   3   3 3833.22  111.39
  -1   3   3 3821.32  110.69
   0  -3   3 2070.39   61.39
   0  -3   3 2012.10   64.09
   0   3   3 2146.29   76.19
  -1  -3  -3 9144.99  279.87
  -1  -3  -3 9604.54  276.47
  -1  -3  -3 9588.74  273.17
  -1   3  -3 9808.32  278.37
   1   3   3 9999.00  278.87
  -2  -3  -3 2393.76   71.89
   2  -3   3 2464.15   74.29
   2  -3   3 2547.45   74.69
  -2  -3  -3 2525.45   81.69
  -2  -3  -3 2461.25   75.99
  -2   3  -3 2398.66   78.59
   2   3   3 2539.05   93.79
  -2   3  -3 2576.14   81.39
  -2   3  -3 2455.35   74.09
  -3  -3  -3  350.16   12.40
  -3  -3  -3  358.96   12.60
  -3  -3  -3  390.46   17.10
   3  -3   3  374.56   14.30
   3  -3   3  341.57   14.40
  -3   3  -3  338.87   18.50
  -3   3  -3  343.87   12.40
  -3   3  -3  328.97   18.60
   3   3   3  341.47   26.50
  -3   3  -3  348.47   17.80
  -3   3  -3  339.97   12.90
  -3   3  -3  335.47   14.30
  -4  -3  -3  100.29    5.60
  -4  -3  -3  105.39    5.80
  -4  -3  -3  102.29    9.00
   4  -3   3  106.49    6.60
   4  -3   3  107.39    6.10
  -4  -3  -3   98.79    5.00
   4   3   3   97.69    8.50
  -4   3  -3  102.09    6.30
   4   3   3  103.49    6.80
  -4   3  -3   99.79    6.10
  -4   3  -3  102.89    4.70
   4   3   3   94.59    6.90
   4   3   3   95.89    7.50
  -4   3  -3  107.29    5.60
   4   3   3  110.89    8.40
  -4   3  -3  105.89    7.20
  -4   3  -3   94.59   11.20
   4   3   3   98.79   10.50
   4   3   3   92.79    6.60
   4   3   3  117.19    7.40
  -5  -3  -3  107.19    6.10
   5  -3   3  116.39    6.70
  -5  -3  -3  116.39    5.40
   5  -3   3  117.39    6.50
  -5   3  -3  111.79    7.80
   5   3   3  121.59    9.30
  -5   3  -3  113.49    6.80
  -5   3  -3  117.99    5.90
  -5   3  -3  113.09    6.80
   5   3   3  109.29    8.00
   5   3   3  114.19    7.30
   5   3   3  113.69   11.20
   5   3   3  115.39    7.70
   5   3   3  105.99    7.10
   5   3   3  116.19    8.70
  -5   3  -3  113.69    5.00
  -6  -3  -3   12.20    1.70
  -6  -3  -3   13.10    2.30
   6  -3   3   10.70    2.40
  -6  -3  -3   10.80    2.00
   6  -3   3   10.30    2.10
  -6   3  -3   16.30    2.90
   6   3   3    8.30    3.10
   6   3   3   10.70    3.30
  -6   3  -3   15.70    1.30
   6   3   3   10.70    2.70
   6   3   3   10.80    2.50
   7  -3   3    4.50    1.10
   7  -3   3    6.40    1.90
  -7  -3  -3    2.80    0.80
  -7  -3  -3    4.60    0.80
   7   3   3    4.70    1.10
   7   3   3    2.40    1.70
   7  -4  -3   88.89    5.10
  -7  -4   3   79.29    5.00
  -7  -4   3   86.49    4.00
   7  -4  -3   82.69    4.90
  -7  -4   3   77.19    4.50
   7   4  -3   84.19    5.50
  -7   4   3   79.79    5.50
   7   4  -3   85.69    5.00
  -7   4   3   85.19    4.90
   7   4  -3   81.29    6.40
   7   4  -3   81.69    6.20
  -6  -4   3   23.30    2.70
  -6  -4   3   23.20    2.70
  -6  -4   3   26.30    2.90
  -6  -4   3   24.20    2.60
   6  -4  -3   23.80    2.90
   6   4  -3   24.40    5.10
   6   4  -3   27.10    7.10
   6   4  -3   30.90    4.40
   6   4  -3   27.80    3.10
  -6   4   3   27.70    3.60
   6   4  -3   23.30    4.80
  -6   4   3   19.30    3.50
   6   4  -3   25.90    4.10
  -5  -4   3  154.38    8.20
   5  -4  -3  153.18    7.70
  -5  -4   3  160.98    7.90
  -5  -4   3  140.89    8.20
  -5  -4   3  149.99   11.50
   5  -4  -3  141.19    7.70
  -5  -4   3  197.88   24.40
   5   4  -3  151.58    8.00
   5   4  -3  147.89    8.40
   5   4  -3  154.28    7.90
  -5   4   3  149.69    7.40
  -5   4   3  155.98    9.00
   5   4  -3  154.98    9.70
   5   4  -3  156.18   10.60
   5   4  -3  163.88   13.80
  -5   4   3  137.49    5.90
  -5   4   3  144.89    9.50
   5   4  -3  165.88    8.90
   4  -4  -3  197.88    8.80
  -4  -4   3  213.08   12.90
  -4  -4   3  205.58   25.50
  -4  -4   3  191.58    9.00
  -4  -4   3  230.18    9.70
   4  -4  -3  199.88   10.10
   4   4  -3  209.78    9.20
   4   4  -3  212.78    9.50
  -4   4   3  202.88    8.80
   4   4  -3  214.08    9.30
   4   4  -3  215.28   11.70
   4   4  -3  221.18   14.40
  -4   4   3  188.38    7.30
  -4   4   3  203.08   10.20
  -4   4   3  210.38   11.20
   4   4  -3  204.58    9.70
   3  -4  -3 1911.41   57.09
  -3  -4   3 1801.82   57.99
   3  -4  -3 1898.51   77.29
  -3   4   3 1839.02   58.39
  -3   4   3 1874.51   63.39
   2  -4  -3  113.59    6.20
   2  -4  -3   81.89   10.40
   2  -4  -3   89.89    5.00
  -2  -4   3  105.59    6.60
  -2  -4   3   85.59    4.60
  -2   4   3   85.09    7.50
  -2   4   3   94.69    5.70
  -2   4   3   94.09    6.90
   2   4  -3   83.79   10.90
   1  -4  -3 2659.83   78.19
   1  -4  -3 2748.72   83.49
  -1  -4   3 2619.44   82.29
  -1   4   3 2650.33   94.99
  -1   4   3 2783.32   79.69
   0  -4   3 6447.06  178.08
   0  -4   3 6401.46  180.88
   0  -4  -3 6311.27  176.38
   0   4   3 5434.26  194.88
   0   4  -3 6340.37  177.28
  -1  -4  -3  586.64   18.00
  -1  -4  -3  596.94   21.10
   1  -4   3  594.34   20.50
  -1  -4  -3  612.04   24.40
   1   4   3  598.74   33.90
  -1   4  -3  575.54   22.80
  -1   4  -3  559.94   19.60
   1   4   3  608.34   30.70
   2  -4   3 2859.91   85.29
  -2  -4  -3 2705.13   92.39
   2  -4   3 2916.51   85.79
  -2  -4  -3 2908.81   86.79
  -2  -4  -3 2740.93   82.29
  -2   4  -3 2850.51   90.39
   2   4   3 2957.90  115.79
  -2   4  -3 2819.62   95.09
  -2   4  -3 2904.71   84.99
  -3  -4  -3 1163.38   36.20
   3  -4   3 1242.68   39.20
  -3  -4  -3 1181.28   41.20
   3  -4   3 1165.68   38.20
  -3  -4  -3 1188.18   36.30
   3  -4   3 1182.58   37.50
   3  -4   3 1178.48   39.40
   3   4   3 1199.98   46.10
   3   4   3 1308.57   43.50
   3   4   3 1162.58   41.10
  -3   4  -3 1108.59   37.50
  -3   4  -3 1132.59   36.80
   3   4   3 1183.28   38.60
   3   4   3 1198.88   39.40
  -3   4  -3 1237.38   48.30
  -3   4  -3 1160.28   45.60
   3   4   3 1162.28   38.90
   3   4   3 1244.38   59.29
   3   4   3 1175.78   39.60
  -3   4  -3 1226.58   39.30
   3   4   3 1193.58   37.40
   4  -4   3   34.30    4.00
  -4  -4  -3   48.40    5.50
   4  -4   3   37.00    7.80
  -4  -4  -3   31.30    3.00
  -4  -4  -3   42.70    3.30
   4  -4   3   31.60    4.00
   4   4   3   42.20    7.20
  -4   4  -3   31.80    2.30
  -4   4  -3   30.20    3.70
   4   4   3   34.60    7.60
   4   4   3   33.20    4.20
  -4   4  -3   33.40    3.20
   4   4   3   36.20    4.30
   4   4   3   36.20    6.00
  -4   4  -3   34.00    3.80
   4   4   3   34.30    4.40
   4   4   3   31.50    4.10
   4   4   3   39.50    5.70
   5  -4   3  233.18   10.70
  -5  -4  -3  230.78    9.80
  -5  -4  -3  223.88    8.60
  -5  -4  -3  232.28   10.00
   5   4   3  231.98   11.20
   5   4   3  223.78   13.10
  -5   4  -3  229.88   11.80
   5   4   3  221.58   11.20
   5   4   3  224.98   15.80
  -5   4  -3  225.28    7.80
  -5   4  -3  212.78   10.20
   5   4   3  234.18   11.70
   5   4   3  225.48   13.40
   5   4   3  235.08   12.00
  -6  -4  -3   97.89    5.30
   6  -4   3   99.99    6.80
   6  -4   3  102.19    6.00
  -6  -4  -3  100.69    5.20
   6  -4   3   92.19    5.00
  -6   4  -3   95.29    5.40
   6   4   3  107.59    7.70
   6   4   3   95.39    8.00
  -6   4  -3   97.99    6.30
   6   4   3   94.39    6.20
   7  -4   3   53.89    3.20
   7  -4   3   51.39    4.60
  -7  -4  -3   61.19    2.40
   7   4   3   56.29    3.60
  -7  -5   3    4.50    1.30
  -7  -5   3    4.80    1.00
   7  -5  -3    3.90    1.20
   7   5  -3    4.90    1.70
   7   5  -3    4.70    1.90
  -7   5   3    3.50    1.50
  -7   5   3    2.90    1.60
   7   5  -3    4.40    1.90
  -6  -5   3  132.99    7.10
   6  -5  -3  137.19    6.90
  -6  -5   3  133.69    6.70
  -6  -5   3  136.49    5.90
   6   5  -3  136.49    9.00
  -6   5   3  133.89    7.60
   6   5  -3  126.79    8.10
   6   5  -3  132.89    7.00
   6   5  -3  136.19    7.50
   6   5  -3  129.49    9.60
  -6   5   3  130.39    8.40
   6   5  -3  130.79   12.40
   5  -5  -3   12.30    2.80
   5  -5  -3   13.60    2.70
   5  -5  -3   15.00    3.20
  -5  -5   3   15.10    2.70
  -5  -5   3   14.30    2.50
  -5  -5   3   11.70    4.40
  -5   5   3   12.40    2.20
   5   5  -3   16.70    4.20
   5   5  -3   17.90    3.30
  -5   5   3   12.00    3.00
   5   5  -3   11.00    3.70
   5   5  -3   12.40    3.00
   5   5  -3   14.20    3.10
   5   5  -3   10.40    2.20
   5   5  -3   13.40    5.30
  -5   5   3   19.80    3.80
  -4  -5   3  154.18    7.90
  -4  -5   3  168.68   10.90
  -4  -5   3  175.88   23.50
   4  -5  -3  158.98    7.80
   4  -5  -3  151.18    8.90
   4  -5  -3  162.48    8.60
  -4  -5   3  167.58    8.00
  -4   5   3  162.18    9.60
   4   5  -3  164.78    8.50
   4   5  -3  151.58    8.30
   4   5  -3  159.38    9.40
   4   5  -3  168.78    8.10
   4   5  -3  166.18   10.60
   4   5  -3  168.78   13.20
  -4   5   3  162.48    8.90
  -4   5   3  161.18    7.30
   4   5  -3  159.58    8.00
   3  -5  -3  173.08    8.50
   3  -5  -3  166.28    7.40
  -3  -5   3  156.38    7.40
   3  -5  -3  152.78   18.10
  -3   5   3  150.08    8.10
   3   5  -3  151.18    7.50
   3   5  -3  156.28    7.30
  -3   5   3  160.58    8.80
   3   5  -3  163.68   11.40
   2  -5  -3  124.99   13.90
  -2  -5   3  124.29    6.00
   2  -5  -3  125.99    6.10
   2   5  -3  122.99   14.10
  -2   5   3  123.89    6.90
  -1  -5   3 4594.24  133.79
   1  -5  -3 4781.32  133.49
   1  -5  -3 4563.04  139.29
  -1   5   3 4596.44  134.29
   0  -5   3 1410.86   43.20
   0  -5   3 1411.86   45.10
   0  -5  -3 1393.06   41.50
   0   5   3 1351.36   61.19
   0   5   3 1412.66   54.99
   0   5  -3 1445.96   42.20
   1  -5   3  890.91   32.10
   1  -5   3  932.81   30.40
  -1  -5  -3  875.91   34.10
  -1  -5  -3  913.41   27.30
   1   5   3  953.90   48.70
  -1   5  -3  900.71   29.10
   1   5   3  946.21   38.40
  -2  -5  -3  248.38   15.30
  -2  -5  -3  233.18   11.00
   2  -5   3  226.88   10.90
   2  -5   3  216.18   10.90
  -2  -5  -3  225.58    8.20
  -2   5  -3  206.78   16.60
   2   5   3  229.78   22.50
  -2   5  -3  229.88   10.30
  -3  -5  -3   38.50    4.60
   3  -5   3   28.50    3.60
   3  -5   3   33.80    5.00
  -3  -5  -3   24.30    2.20
   3  -5   3   28.30    3.40
   3  -5   3   23.80    3.90
  -3   5  -3   39.60    9.60
   3   5   3   28.40    3.70
   3   5   3   33.80    4.90
  -3   5  -3   23.30    2.90
   3   5   3   27.80    2.80
   3   5   3   30.60    4.80
   3   5   3   29.80    3.40
   3   5   3   30.80   11.90
   3   5   3   35.10    5.20
   3   5   3   34.30    6.10
   3   5   3   33.80    5.80
   3   5   3   43.40    5.70
   4  -5   3  993.20   33.20
  -4  -5  -3  956.50   30.80
   4  -5   3  979.20   33.10
  -4  -5  -3  967.60   31.20
  -4  -5  -3  967.80   36.10
   4  -5   3  960.20   31.70
   4   5   3 1003.20   37.80
   4   5   3  993.90   33.60
   4   5   3 1003.60   34.70
   4   5   3  999.00   34.60
   4   5   3  972.00   34.20
   4   5   3  949.40   32.80
  -4   5  -3  975.50   32.50
   4   5   3  967.80   41.40
   4   5   3 1000.30   37.00
  -4   5  -3  990.90   34.40
  -5  -5  -3  165.68    7.70
   5  -5   3  162.28    8.60
  -5  -5  -3  164.48    7.40
  -5  -5  -3  158.88    6.50
  -5   5  -3  149.49    8.00
   5   5   3  169.98   11.40
   5   5   3  156.18   10.80
   5   5   3  159.88    9.80
   5   5   3  156.08    8.70
   5   5   3  163.38    9.30
   5   5   3  166.68   12.90
  -5   5  -3  158.28    9.20
   6  -5   3  357.36   12.20
   6  -5   3  338.17   12.00
  -6  -5  -3  364.06   11.30
  -6  -5  -3  360.36   12.90
   6   5   3  350.36   15.40
  -6   5  -3  364.26   12.80
   6   5   3  355.46   13.70
  -6   5  -3  315.97   13.60
   6   5   3  298.77   15.20
  -7  -6   3   55.09    3.90
   7  -6  -3   49.50    3.10
  -7  -6   3   54.29    2.40
   7   6  -3   49.60    3.90
  -7   6   3   53.79    3.20
   7   6  -3   57.59    4.70
   7   6  -3   53.79    3.80
  -6  -6   3  198.28    8.50
  -6  -6   3  212.48    7.80
  -6  -6   3  205.28    8.80
   6  -6  -3  209.08    9.00
  -6   6   3  205.98    9.50
   6   6  -3  212.18   10.10
   6   6  -3  203.18   11.00
   6   6  -3  199.48    9.00
  -6   6   3  197.98   10.20
   6   6  -3  182.08   11.60
   5  -6  -3  101.39    6.40
  -5  -6   3   98.69    5.90
  -5  -6   3   90.59    5.60
   5  -6  -3  100.49    6.70
   5  -6  -3   98.99    6.00
   5   6  -3   89.49    7.70
   5   6  -3  107.99   11.50
  -5   6   3  105.49    6.80
   5   6  -3  105.19    6.30
   5   6  -3  111.09    9.10
   5   6  -3   98.19    6.00
   5   6  -3   98.89    7.00
  -5   6   3   86.59    7.00
   4  -6  -3  843.02   28.70
   4  -6  -3  837.72   29.70
  -4  -6   3  852.31   31.10
  -4  -6   3  813.02   54.79
  -4  -6   3  809.02   27.00
  -4  -6   3  873.91   27.50
  -4   6   3  793.22   29.60
  -4   6   3  770.92   31.50
   4   6  -3  781.62   29.80
   4   6  -3  810.52   31.00
   3  -6  -3  923.71   30.30
   3  -6  -3  950.70   31.40
  -3  -6   3  952.70   30.60
   3  -6  -3 1009.00   36.00
   3  -6  -3  921.11   29.80
   3   6  -3  989.80   38.50
   3   6  -3  960.60   34.90
   3   6  -3 1021.70   32.30
  -3   6   3  910.41   31.50
   3   6  -3  976.10   30.70
  -3   6   3  934.31   32.70
  -3   6   3  943.51   32.50
   3   6  -3  918.01   31.00
  -2  -6   3 1594.44   48.50
   2  -6  -3 1646.34   49.50
   2  -6  -3 1564.54   48.90
   2  -6  -3 1520.25   68.59
  -2   6   3 1643.84   49.80
   2   6  -3 1625.24   71.99
   1  -6  -3  772.32   26.00
   1  -6  -3  768.12   25.90
   1  -6  -3  897.11   34.60
  -1   6   3  831.12   26.10
   1   6  -3  864.01   47.50
   0  -6   3 2366.86   70.69
   0  -6   3 2237.08   70.49
   0  -6  -3 2359.16   68.89
   0   6  -3 2377.86   68.89
   0   6   3 2457.35   86.59
   1  -6   3 1076.69   35.70
  -1  -6  -3 1065.99   32.30
   1  -6   3 1077.69   35.40
  -1   6  -3 1117.79   34.20
   2  -6   3  418.76   18.00
   2  -6   3  442.46   18.00
  -2  -6  -3  428.06   14.40
   2  -6   3  457.65   18.50
   2  -6   3  448.06   17.40
   2   6   3  492.25   28.00
   2   6   3  436.06   17.80
  -2   6  -3  452.45   16.90
   2   6   3  445.26   23.10
   2   6   3  440.96   17.80
   2   6   3  413.86   21.90
   2   6   3  451.35   18.40
  -2   6  -3  439.26   16.20
   2   6   3  503.45   25.20
   2   6   3  458.65   18.40
  -3  -6  -3  811.22   29.30
  -3  -6  -3  833.82   25.90
   3  -6   3  820.92   29.70
   3  -6   3  799.02   27.90
   3  -6   3  807.42   30.20
   3  -6   3  858.01   28.80
   3   6   3  847.72   36.40
   3   6   3  836.62   29.40
  -3   6  -3  793.52   28.80
   3   6   3  838.52   33.80
   3   6   3  832.72   27.30
   3   6   3  821.22   30.00
   3   6   3  815.32   28.90
   3   6   3  809.92   32.00
  -3   6  -3  832.32   27.70
   3   6   3  842.42   30.00
  -4  -6  -3  170.48    7.80
  -4  -6  -3  165.68    7.30
   4  -6   3  170.98    9.40
   4  -6   3  166.78    9.20
   4  -6   3  168.18    8.70
  -4   6  -3  163.48    8.50
   4   6   3  176.18   10.40
  -4   6  -3  165.58    9.50
   4   6   3  162.88    8.70
   4   6   3  162.48   13.50
   4   6   3  173.28   10.00
   4   6   3  172.08   12.10
   4   6   3  179.28   10.00
   4   6   3  159.58   11.60
  -5  -6  -3    9.60    1.80
   5  -6   3   11.50    2.40
  -5   6  -3   12.40    2.80
   5   6   3   12.00    3.20
  -5   6  -3   10.20    2.10
   5   6   3   10.10    3.60
   5   6   3    7.50    2.20
   5   6   3    9.90    3.70
  -6  -6  -3   16.20    1.30
  -6  -6  -3   12.90    1.80
   6  -6   3   13.40    1.80
  -6   6  -3    6.50    2.10
  -6   6  -3   15.80    2.10
   6   6   3   13.00    3.00
   6   6   3   11.00    2.10
   6   6   3   12.30    4.30
   7  -7  -3    9.20    1.50
   7   7  -3    7.30    2.50
  -7   7   3   13.90    2.10
   7   7  -3    7.10    2.00
   6  -7  -3   71.59    4.60
  -6  -7   3   68.49    3.80
  -6  -7   3   66.79    3.40
  -6  -7   3   75.59    4.10
  -6   7   3   71.39    4.80
   6   7  -3   72.39    7.10
   6   7  -3   70.69    6.10
   5  -7  -3   52.99    7.40
  -5  -7   3   57.59    4.10
   5  -7  -3   63.99    5.10
   5  -7  -3   58.79    4.60
  -5  -7   3   64.79    4.30
   5   7  -3   58.29    4.60
   5   7  -3   62.09    5.60
   5   7  -3   53.59    5.90
   5   7  -3   61.99    4.50
  -5   7   3   57.99    5.00
   5   7  -3   52.89    6.60
   5   7  -3   60.09    8.50
  -5   7   3   54.69    4.70
   4  -7  -3  779.32   26.90
   4  -7  -3  822.32   29.40
   4  -7  -3  814.12   26.40
  -4  -7   3  796.82   26.40
   4  -7  -3  830.72   28.50
  -4  -7   3  708.83   27.40
   4   7  -3  807.62   36.30
   4   7  -3  805.62   27.00
   4   7  -3  805.82   32.00
   4   7  -3  815.82   27.10
  -4   7   3  830.72   27.80
  -4   7   3  811.02   28.70
   4   7  -3  719.13   29.00
   4   7  -3  795.42   27.90
   3  -7  -3  880.01   29.20
   3  -7  -3  829.32   27.80
   3  -7  -3  843.12   27.30
  -3  -7   3  859.71   27.90
   3  -7  -3  897.11   53.99
   3  -7  -3  841.32   30.10
  -3   7   3  841.62   30.10
   3   7  -3  865.91   36.20
   3   7  -3  822.32   28.70
   3   7  -3  852.01   28.50
   3   7  -3  852.61   32.80
  -3   7   3  826.42   28.70
   3   7  -3  846.12   28.10
  -3   7   3  879.31   29.60
   2  -7  -3  457.45   17.30
   2  -7  -3  414.76   16.80
   2  -7  -3  456.15   16.50
  -2  -7   3  463.35   16.80
   2   7  -3  499.85   22.80
  -2   7   3  500.55   48.60
  -2   7   3  480.95   17.20
   2   7  -3  549.05   43.40
   2   7  -3  461.25   20.20
   2   7  -3  473.25   17.40
  -2   7   3  496.75   19.70
  -2   7   3  451.25   16.90
   2   7  -3  486.55   19.70
  -1  -7   3 1670.53   51.09
  -1  -7   3 1599.54   50.89
   1  -7  -3 1649.54   57.89
   1  -7  -3 1594.04   50.09
   1  -7  -3 1695.93   50.79
  -1   7   3 1687.43   48.90
  -1   7   3 1628.64   71.29
   1   7  -3 1693.23   51.39
  -1   7   3 1769.02   59.89
  -1   7   3 1696.83   53.89
   1   7  -3 1624.14   52.59
   1   7  -3 1680.53   75.39
  -1   7   3 1588.64   51.99
   0  -7  -3   73.29    7.60
   0  -7  -3   78.09    4.30
   0  -7   3   82.59    5.50
   0  -7   3   75.59    5.50
   0   7   3   72.59    7.50
   0   7   3   94.29   12.70
   0   7   3   79.79    6.40
   0   7   3   77.19    8.60
   0   7   3   87.39    6.00
   0   7  -3   66.99    7.40
   0   7  -3   77.69    3.70
   0   7  -3   81.59    5.20
   1  -7   3  328.27   13.70
   1  -7   3  347.77   15.00
  -1  -7  -3  335.17   11.70
   1  -7   3  365.26   14.80
   1  -7   3  328.37   13.30
   1   7   3  336.87   19.60
  -1   7  -3  317.27   15.00
  -1   7  -3  342.17   14.20
  -1   7  -3  358.36   13.00
   1   7   3  356.76   17.20
   1   7   3  376.36   15.40
  -1   7  -3  331.97   13.70
   1   7   3  363.06   15.90
   1   7   3  351.46   14.90
  -2  -7  -3  441.46   14.80
   2  -7   3  444.86   17.10
   2  -7   3  435.46   17.40
   2  -7   3  463.75   18.90
   2  -7   3  440.16   19.10
   2   7   3  422.96   18.30
   2   7   3  452.95   20.80
  -2   7  -3  458.85   16.40
   2   7   3  473.55   19.10
   2   7   3  460.85   18.50
  -2   7  -3  464.75   17.10
   2   7   3  485.55   19.40
   2   7   3  472.95   24.60
   2   7   3  451.45   18.30
  -3  -7  -3  272.47    9.80
   3  -7   3  261.57   12.20
   3  -7   3  261.77   13.50
   3  -7   3  268.07   11.90
   3   7   3  261.47   16.20
   3   7   3  239.18   12.80
   3   7   3  251.37   17.40
  -3   7  -3  263.17   11.20
   3   7   3  251.87   14.80
  -3   7  -3  255.77   11.80
   3   7   3  257.07   12.30
   3   7   3  260.27   12.80
   3   7   3  264.77   13.20
   3   7   3  246.68   10.50
   4  -7   3   12.00    2.80
  -4  -7  -3   15.00    2.30
   4  -7   3   17.20    3.30
  -4  -7  -3   15.10    1.90
   4  -7   3   14.10    3.40
   4  -7   3   13.80    3.10
   4   7   3   17.50    4.80
   4   7   3   18.60    3.60
  -4   7  -3   18.50    3.10
   4   7   3   17.40    3.70
  -4   7  -3   15.60    3.10
   4   7   3   14.60    2.70
   4   7   3   17.40    4.80
   5  -7   3    0.20    1.30
  -5  -7  -3    2.40    1.10
   5  -7   3    2.60    1.40
   5   7   3    2.60    2.30
  -5   7  -3    3.40    1.40
   5   7   3    1.00    1.90
   5   7   3    3.10    1.80
  -5   7  -3    2.00    1.10
   6  -7   3    0.10    0.80
  -6   7  -3    0.30    0.60
  -6   7  -3    0.70    0.70
   6   7   3    0.30    2.40
   6  -8  -3   26.10    2.40
   6   8  -3   23.30    3.20
   6   8  -3   23.50    3.90
  -6   8   3   25.30    2.30
   6   8  -3   25.40    2.30
   5  -8  -3  221.98    9.40
   5  -8  -3  209.38   10.10
  -5  -8   3  216.08    8.80
   5  -8  -3  227.48    9.80
  -5   8   3  230.98    9.80
  -5   8   3  226.48   10.20
   5   8  -3  228.28   10.60
   5   8  -3  210.48    9.60
   5   8  -3  228.78    9.50
   5   8  -3  209.48   15.60
   5   8  -3  207.88   12.60
   5   8  -3  215.68   10.70
  -4  -8   3 1135.89   34.40
   4  -8  -3 1033.40   34.70
   4  -8  -3 1081.49   37.60
   4  -8  -3 1122.49   36.70
   4  -8  -3 1109.69   34.60
   4   8  -3 1046.40   44.40
  -4   8   3 1080.69   35.80
   4   8  -3 1058.29   36.90
   4   8  -3 1081.49   35.00
   4   8  -3 1079.69   36.80
  -4   8   3 1118.59   35.50
   4   8  -3 1065.69   40.20
   4   8  -3 1068.69   35.00
   3  -8  -3  176.08   10.00
   3  -8  -3  188.58    9.60
   3  -8  -3  173.68    8.50
  -3  -8   3  181.68    8.40
   3  -8  -3  179.68   22.60
   3  -8  -3  171.58    8.10
   3   8  -3  181.48    8.90
  -3   8   3  197.58   22.70
  -3   8   3  180.78    8.80
   3   8  -3  177.58   13.90
  -3   8   3  176.98    8.70
   3   8  -3  167.18    9.30
  -3   8   3  186.78   10.00
   3   8  -3  179.38    8.60
   3   8  -3  173.18   11.80
   2  -8  -3  372.96   14.40
   2  -8  -3  396.96   32.40
   2  -8  -3  389.56   16.00
  -2  -8   3  402.46   15.10
   2  -8  -3  407.26   15.80
   2  -8  -3  391.06   14.00
   2   8  -3  399.86   15.50
   2   8  -3  405.76   18.00
   2   8  -3  390.26   14.60
  -2   8   3  389.36   14.70
  -2   8   3  386.46   14.50
  -2   8   3  394.96   13.90
  -2   8   3  360.76   30.10
   2   8  -3  401.96   20.80
   2   8  -3  404.06   19.00
  -2   8   3  390.36   17.40
   2   8  -3  382.96   33.20
   1  -8  -3  138.19   17.40
  -1  -8   3  162.78    8.00
  -1  -8   3  145.99    8.10
   1  -8  -3  124.89    6.90
   1   8  -3  168.18   19.40
  -1   8   3  137.99    9.10
   1   8  -3  138.39    7.60
   1   8  -3  137.29   10.40
   1   8  -3  151.68   11.10
  -1   8   3  124.79    5.90
  -1   8   3  140.99   17.90
   0  -8   3  701.93   25.00
   0  -8   3  654.43   24.30
   0  -8  -3  688.63   22.70
   0  -8  -3  735.73   30.20
   0   8   3  659.53   40.40
   0   8  -3  717.83   24.20
   0   8   3  699.93   26.80
   0   8  -3  655.03   21.10
   0   8   3  653.53   26.70
   0   8  -3  648.34   44.30
   0   8  -3  704.33   26.20
   0   8   3  710.53   31.60
   0   8   3  698.13   25.40
  -1  -8  -3  224.98    8.90
   1  -8   3  232.08   12.00
  -1  -8  -3  263.27   15.70
   1  -8   3  224.68   10.60
   1  -8   3  230.78   10.80
   1  -8   3  237.38   11.70
   1   8   3  237.68   13.60
  -1   8  -3  210.08   12.40
   1   8   3  245.88   12.80
   1   8   3  253.57   12.10
  -1   8  -3  233.18    9.00
   1   8   3  249.48   16.70
  -1   8  -3  246.18   11.00
  -1   8  -3  230.08    9.20
   2  -8   3  493.85   20.80
   2  -8   3  496.95   19.20
  -2  -8  -3  488.35   16.30
   2  -8   3  500.25   18.80
   2  -8   3  475.75   20.80
  -2   8  -3  520.95   18.20
   2   8   3  521.15   20.10
   2   8   3  537.25   26.80
   2   8   3  512.05   20.70
   2   8   3  486.35   22.30
  -2   8  -3  496.05   17.70
   3  -8   3  672.43   24.10
   3  -8   3  677.53   26.20
   3  -8   3  657.63   25.30
  -3  -8  -3  669.63   21.10
   3  -8   3  676.83   23.80
  -3   8  -3  654.63   23.30
   3   8   3  687.23   27.70
   3   8   3  620.44   23.60
   3   8   3  648.64   30.90
  -3   8  -3  657.23   22.50
   3   8   3  660.63   24.00
   4  -8   3   77.59    6.70
   4  -8   3   87.99    6.10
   4  -8   3   91.89    6.00
   4  -8   3   82.89    6.20
  -4   8  -3   77.59    5.30
   4   8   3   91.09    8.10
  -4   8  -3   85.19    5.20
   4   8   3   83.09    8.60
   5  -8   3  173.78    7.70
   5   8   3  164.78    9.30
   5   8   3  137.09    9.20
  -5   8  -3  141.49    6.90
  -5   8  -3  167.08    6.80
  -6   9   3    7.80    1.00
   5  -9  -3   77.39    4.60
   5  -9  -3   77.49    4.70
   5  -9  -3   85.99    5.20
   5   9  -3   68.29    4.00
   5   9  -3   66.49    6.30
   5   9  -3   80.79    5.30
  -5   9   3   72.99    4.20
   5   9  -3   76.79    4.50
  -5   9   3   70.29    3.80
  -5   9   3   68.49    3.80
   4  -9  -3   46.50    4.30
   4  -9  -3   52.09    5.00
  -4  -9   3   52.99    4.50
   4  -9  -3   46.20    4.80
   4  -9  -3   48.00    4.00
  -4   9   3   44.20    3.30
   4   9  -3   47.20    7.00
   4   9  -3   45.60    3.80
  -4   9   3   45.10    3.60
   4   9  -3   44.70    3.60
  -4   9   3   47.40    3.60
   4   9  -3   45.30    5.70
   4   9  -3   44.00    4.60
  -3  -9   3   22.50    2.80
   3  -9  -3   20.70    2.80
   3  -9  -3   19.30    3.50
   3  -9  -3   16.60    3.30
   3  -9  -3   23.10    2.90
   3   9  -3   23.30    4.90
  -3   9   3   22.10    4.70
   3   9  -3   23.60    2.80
  -3   9   3   22.40    3.50
   3   9  -3   23.10    2.90
  -3   9   3   19.90    2.50
  -3   9   3   22.20    2.10
   3   9  -3   25.40    6.70
   3   9  -3   22.70    4.20
   2  -9  -3  584.24   21.00
   2  -9  -3  545.15   19.30
   2  -9  -3  597.34   22.00
  -2  -9   3  610.64   21.00
   2  -9  -3  528.85   19.60
  -2   9   3  562.14   22.70
   2   9  -3  556.94   26.50
   2   9  -3  571.74   20.00
  -2   9   3  565.14   18.80
   2   9  -3  589.44   20.90
  -2   9   3  607.64   20.10
  -1  -9   3 1063.09   34.80
  -1  -9   3 1016.60   34.40
   1  -9  -3 1013.40   34.30
   1  -9  -3  978.20   32.40
   1  -9  -3 1041.50   57.89
   1  -9  -3 1043.90   34.40
   1   9  -3 1057.99   36.90
  -1   9   3 1044.00   37.20
   1   9  -3 1071.09   62.29
   1   9  -3 1091.29   34.50
  -1   9   3 1055.29   58.69
   0  -9   3  217.48   11.00
   0  -9   3  201.38   10.60
   0  -9  -3  222.18    9.50
   0  -9  -3  192.18   28.50
   0  -9  -3  206.18    9.00
   0   9  -3  224.48   13.70
   0   9  -3  207.98   10.10
   0   9   3  217.88   12.20
   0   9  -3  215.78   23.90
   1  -9   3 1083.99   35.80
  -1  -9  -3 1169.48   34.50
   1  -9   3 1129.29   37.90
   1  -9   3 1053.49   35.90
   1  -9   3 1117.79   38.40
   1   9   3 1129.69   39.00
   1   9   3 1101.19   39.10
  -1   9  -3 1073.09   33.30
   1   9   3 1123.59   45.00
  -1   9  -3  942.81   59.29
   1   9   3 1143.39   37.60
  -1   9  -3 1129.09   36.40
   2  -9   3  465.95   17.90
   2  -9   3  464.45   20.10
   2  -9   3  453.15   17.90
  -2  -9  -3  419.96   15.90
   2  -9   3  459.45   19.50
  -2   9  -3  525.05   17.40
   2   9   3  492.85   25.30
   2   9   3  472.05   20.80
   2   9   3  473.55   19.30
  -2   9  -3  468.75   16.10
  -2   9  -3  465.25   18.00
   2   9   3  467.85   18.60
   3  -9   3  185.58   10.40
   3  -9   3  190.78    9.50
   3  -9   3  176.98    9.30
   3  -9   3  174.48   10.30
   3   9   3  193.18   11.90
  -3   9  -3  191.28    8.00
  -3   9  -3  181.28    7.90
  -3   9  -3  189.18    9.10
   3   9   3  182.28    9.30
   3   9   3  182.08   13.70
   4  -9   3  109.69    6.50
   4  -9   3  106.39    6.00
   4  -9   3  115.49    7.50
   4   9   3   96.89    8.30
   4   9   3  111.19    8.00
  -4   9  -3  112.99    5.40
  -4   9  -3  109.69    5.30
  -4   9  -3  107.49    5.90
   5  -9   3  154.18    6.60
  -5   9  -3  163.98    6.70
  -5   9  -3  151.78    6.20
   5   9   3  126.39    8.00
   5 -10  -3   36.10    2.50
   5 -10  -3   38.90    2.80
  -5  10   3   36.90    1.80
   5  10  -3   33.00    2.70
   4 -10  -3   36.80    4.00
   4 -10  -3   42.30    6.30
   4 -10  -3   41.90    4.30
   4 -10  -3   31.60    5.00
   4  10  -3   36.90    3.50
  -4  10   3   38.30    2.50
  -4  10   3   36.40    3.20
   3 -10  -3  215.88   11.20
   3 -10  -3  213.48    9.30
   3 -10  -3  215.28    9.30
   3 -10  -3  214.28   10.60
   3  10  -3  221.98    9.40
   3  10  -3  225.58    9.80
   3  10  -3  217.18   14.30
  -3  10   3  236.28    9.40
  -3  10   3  217.88    7.90
  -3  10   3  215.88   10.50
   2 -10  -3   24.70    4.00
  -2 -10   3   30.50    3.90
   2 -10  -3   26.80    2.90
   2 -10  -3   24.70    3.90
   2 -10  -3   22.30    2.60
   2  10  -3   23.60    3.00
   2  10  -3   28.10    5.70
   2  10  -3   27.90    2.80
  -2  10   3   25.00    3.80
   1 -10  -3  324.57   13.30
  -1 -10   3  309.97   13.30
   1 -10  -3  304.57   12.70
  -1 -10   3  306.17   13.40
  -1  10   3  292.27   14.60
   1  10  -3  291.27   11.60
   1  10  -3  297.47   12.70
   0 -10  -3 1686.63   51.39
   0 -10   3 1650.33   53.39
   0 -10   3 1603.64   52.89
   0 -10  -3 1633.64   50.99
   0  10  -3 1703.13   52.29
   0  10   3 1714.13   54.89
   1 -10   3  124.59    7.30
  -1 -10  -3  133.09    6.60
   1 -10   3  125.09    8.30
   1 -10   3  133.59    7.30
   1 -10   3  139.29    8.70
  -1  10  -3  135.79    7.60
   1  10   3  147.89    9.90
   2 -10   3   68.79    5.40
   2 -10   3   61.39    4.90
   2 -10   3   73.49    6.30
   2 -10   3   71.79    6.30
  -2  10  -3   63.99    4.90
   2  10   3   77.89    9.70
  -2  10  -3   66.69    3.30
   2  10   3   70.99    8.50
   2  10   3   69.79    6.10
   3 -10   3  133.99    7.20
   3 -10   3  123.69    7.90
   3 -10   3  123.59    7.60
   3 -10   3  124.19    6.90
   3  10   3  113.69    8.80
  -3  10  -3  122.79    5.80
  -3  10  -3  115.49    6.40
   3  10   3  133.69   10.60
   4 -10   3   55.89    3.80
   4 -10   3   52.69    3.40
   4  10   3   55.89    5.60
  -4  10  -3   45.70    3.20
  -4  10  -3   50.29    2.50
   4 -11  -3  121.29    5.60
   4 -11  -3  105.29    5.90
   4 -11  -3   92.59    6.00
   4  11  -3  105.39    4.60
   4  11  -3  115.69    5.30
   3 -11  -3   22.40    3.50
   3 -11  -3   30.50    3.60
   3 -11  -3   17.70    2.60
   3 -11  -3   24.20    2.50
  -3  11   3   14.40    3.30
   3  11  -3   21.60    2.40
   3  11  -3   26.90    2.80
   2 -11  -3   30.60    3.40
   2 -11  -3   25.40    2.70
   2 -11  -3   27.70    3.10
  -2 -11   3   24.50    3.10
   2  11  -3   26.10    2.70
   2  11  -3   23.20    2.50
  -2  11   3   24.10    4.00
   1 -11  -3   61.09    4.50
  -1 -11   3   63.99    5.20
  -1 -11   3   64.69    4.80
   1 -11  -3   62.79    4.00
   1  11  -3   64.99    4.50
  -1  11   3   51.19    5.50
   1  11  -3   64.89    3.80
   0 -11  -3  626.64   21.80
   0 -11   3  653.43   22.00
   0 -11   3  630.74   23.00
   0 -11  -3  640.74   21.40
   0 -11   3  649.93   25.90
   0  11   3  618.44   24.10
   0  11  -3  619.84   20.90
   0  11  -3  634.54   22.00
   1 -11   3  219.58   11.00
   1 -11   3  212.78   10.70
  -1 -11  -3  212.18    8.70
   1 -11   3  216.38    9.70
   1 -11   3  218.48    9.30
   1  11   3  211.98   11.10
  -1  11  -3  223.48    9.80
   2 -11   3  325.97   13.70
   2 -11   3  323.77   12.60
   2 -11   3  297.97   11.90
   2 -11   3  302.97   13.70
   2  11   3  312.37   13.30
  -2  11  -3  302.77   12.00
   3 -11   3   30.40    3.30
   3 -11   3   27.70    2.90
   3 -11   3   28.10    3.60
  -3  11  -3   30.60    2.60
  -4  11  -3   13.60    1.50
   3 -12  -3  248.78   11.30
   3  12  -3  228.98    8.20
   2 -12  -3   57.19    4.20
   2 -12  -3   59.09    3.80
   2  12  -3   55.29    3.50
  -2  12   3   57.69    5.90
  -1 -12   3   14.20    2.70
   1 -12  -3   17.60    2.20
   1 -12  -3   13.00    2.30
   1 -12  -3   11.30    2.30
   1  12  -3   13.00    1.80
   0 -12   3  141.59    7.70
   0 -12  -3  149.59    6.90
   0 -12   3  141.59    7.70
   0 -12   3  153.18    7.10
   0  12  -3  151.98    6.90
   0  12   3  171.38    9.00
   1 -12   3  121.29    6.90
   1 -12   3  120.99    6.10
   1 -12   3  120.79    6.80
  -1  12  -3  118.09    5.80
   1  12   3  135.89    8.10
   2 -12   3   49.40    4.00
   2 -12   3   53.39    3.70
   2  12   3   42.40    5.10
  -2  12  -3   44.70    2.90
  -3  12  -3   86.19    3.70
  -1  13   3   16.70    3.70
   1  13  -3   10.20    1.20
   0  13   3   17.20    3.80
   0  13  -3   11.90    1.30
   1 -13   3  273.97    9.00
  -1  13  -3  256.37    8.80
   8   0  -4   19.30    2.20
   8   0  -4   15.00    1.60
  -7   0   4  151.88    7.00
   7   0  -4  146.19    8.80
   7   0  -4  149.99    7.50
  -7   0   4  147.69    6.10
   7   0  -4  155.38    8.80
  -7   0   4  163.08    7.80
  -7   0   4  154.28    6.90
   7   0  -4  146.69    7.20
   6   0  -4   11.80    2.80
   6   0  -4    9.10    2.90
  -6   0   4    6.00    2.00
  -6   0   4    7.70    2.20
  -6   0   4   10.40    3.00
   6   0  -4    8.70    2.20
  -6   0   4    7.50    1.60
  -6   0   4    7.50    1.90
   5   0  -4  786.32   26.30
  -5   0   4  812.62   25.80
  -5   0   4  774.82   26.70
  -5   0   4  822.12   27.20
  -5   0   4  773.72   36.10
   5   0  -4  777.82   33.00
  -5   0   4  828.82   28.20
  -5   0   4  841.32   30.40
  -4   0   4  127.39    7.10
  -4   0   4  135.89    6.80
  -4   0   4  139.09    8.60
  -4   0   4  123.79   19.10
  -4   0   4  143.49   11.60
  -3   0   4 2585.64  102.29
  -3   0   4 2476.75   74.99
  -3   0   4 2565.44   77.39
  -3   0   4 2477.35   74.49
   2   0  -4 1179.68   43.60
  -2   0   4 1269.77   37.90
   0   0  -4 1234.98   40.10
   0   0   4 1194.18   49.40
  -1   0  -4 4417.96  134.69
  -1   0  -4 4442.16  132.29
  -1   0  -4 4478.25  127.69
  -2   0  -4   90.49    7.30
  -2   0  -4   76.29    4.10
  -2   0  -4   75.39    4.80
  -2   0  -4   76.99    4.30
  -2   0  -4   83.09    7.50
  -3   0  -4 1992.70   58.69
  -3   0  -4 1889.41   60.29
  -3   0  -4 1993.50   66.79
  -3   0  -4 1984.60   59.19
  -4   0  -4    1.90    1.20
  -4   0  -4    0.50    0.90
  -4   0  -4    1.50    1.00
   4   0   4    6.50    2.60
   4   0   4    1.70    1.30
  -4   0  -4    3.50    3.10
   5   0   4  378.76   16.10
  -5   0  -4  383.56   14.70
   5   0   4  377.56   15.00
  -5   0  -4  387.16   16.40
  -5   0  -4  382.76   13.20
  -5   0  -4  364.86   14.90
   5   0   4  367.66   16.70
   6   0   4   66.79    7.50
  -6   0  -4   65.69    3.50
  -6   0  -4   67.09    4.10
  -6   0  -4   64.79    4.50
   6   0   4   65.59    5.00
   7   0   4   49.20    4.10
   7   0   4   60.49    3.40
  -7   0  -4   61.39    2.20
   8  -1  -4   30.40    2.60
   8   1  -4   23.40    3.20
   8   1  -4   27.70    2.80
   7  -1  -4   31.90    3.70
   7  -1  -4   31.50    3.70
  -7  -1   4   31.00    3.20
   7  -1  -4   32.40    3.10
  -7  -1   4   32.10    3.00
  -7  -1   4   29.50    2.70
  -7  -1   4   30.30    2.40
   7   1  -4   25.90    2.90
  -7   1   4   28.30    2.60
  -7   1   4   29.40    4.70
   7   1  -4   25.30    4.20
   7   1  -4   31.10    4.10
  -7   1   4   24.90    3.60
  -7   1   4   34.50    2.90
  -7   1   4   33.00    2.30
   6  -1  -4  629.74   22.20
  -6  -1   4  616.94   20.60
  -6  -1   4  635.84   21.60
  -6  -1   4  656.73   23.20
  -6  -1   4  633.54   22.20
   6  -1  -4  619.64   21.40
   6   1  -4  635.24   25.00
  -6   1   4  630.94   21.80
  -6   1   4  608.84   22.60
   6   1  -4  627.24   22.30
  -6   1   4  613.74   24.60
   6   1  -4  616.24   21.10
   6   1  -4  632.14   22.20
   6   1  -4  596.74   28.40
  -6   1   4  616.84   20.20
  -6   1   4  627.84   21.70
  -6   1   4  592.94   25.70
  -5  -1   4  206.28   10.20
  -5  -1   4  192.78   15.00
  -5  -1   4  197.98    9.20
  -5  -1   4  215.68    9.60
   5  -1  -4  183.38    8.40
  -5  -1   4  193.28   11.20
  -5  -1   4  219.88   29.30
  -5  -1   4  195.38    8.50
  -5   1   4  203.28   11.60
  -5   1   4  198.78    8.30
  -5   1   4  184.98   15.30
   5   1  -4  193.98    9.20
  -5   1   4  199.78    9.20
   5   1  -4  201.98    9.00
  -5   1   4  195.88   10.40
   5   1  -4  200.88    9.50
  -5   1   4  196.98    9.90
   5   1  -4  202.08   14.00
  -5   1   4  222.88    9.70
  -4  -1   4  756.12   26.00
  -4  -1   4  762.02   33.10
  -4  -1   4  733.93   28.40
  -4  -1   4  781.32   52.89
  -4  -1   4  779.52   26.60
  -4   1   4  789.32   28.90
  -4   1   4  801.52   26.60
  -4   1   4  807.82   34.20
  -4   1   4  873.31   26.70
  -4   1   4  766.82   25.80
  -3  -1   4 1568.54   49.40
   3  -1  -4 1605.74   49.40
  -3  -1   4 1607.54   73.89
   3  -1  -4 1735.23   64.29
  -3  -1   4 1745.63   55.79
  -3  -1   4 1573.94   49.80
  -3   1   4 1624.84   49.30
  -3   1   4 1623.74   56.09
  -3   1   4 1680.83   52.29
  -3   1   4 1621.04   76.49
  -3   1   4 1612.74   49.70
  -2  -1   4 1071.99   33.30
   2  -1  -4 1029.20   32.60
  -2   1   4 1037.30   35.00
  -2   1   4 1065.89   33.60
  -2   1   4 1029.20   40.40
   2   1  -4 1096.49   37.30
   2   1  -4 1112.49   39.40
  -2   1   4 1073.59   50.09
   1  -1  -4 4521.95  131.39
   1  -1  -4 4448.06  127.19
  -1  -1   4 4475.15  128.19
   1   1  -4 4429.76  129.79
  -1   1   4 4515.65  141.59
  -1   1   4 4199.18  133.39
   0  -1  -4 2909.41   87.39
   0  -1  -4 2870.81   91.19
   0  -1   4 3287.37   89.79
   0  -1   4 3296.97  105.29
   0   1   4 2994.80   93.89
   0   1  -4 2871.61   91.29
  -1  -1  -4 1444.66   42.80
  -1  -1  -4 1420.36   46.90
  -1   1  -4 1468.85   43.00
  -1   1  -4 1429.96   47.50
  -2  -1  -4 8581.14  247.48
  -2  -1  -4 8205.68  253.27
  -2  -1  -4 8330.77  257.57
  -2   1  -4 9054.69  255.07
  -2   1  -4 8833.32  257.17
  -2   1  -4 8823.92  247.58
  -2   1  -4 8731.63  247.88
  -2   1  -4 8898.31  249.28
  -3  -1  -4 1009.40   31.90
  -3  -1  -4  980.50   33.40
  -3  -1  -4 1010.10   38.80
  -3  -1  -4 1030.40   32.30
  -3   1  -4 1051.69   34.30
  -3   1  -4 1004.10   39.60
  -3   1  -4 1043.90   32.10
  -4  -1  -4  111.09   10.40
   4  -1   4  108.59    6.60
  -4  -1  -4  125.69    6.40
   4  -1   4  138.39    6.80
  -4  -1  -4  116.39    5.40
  -4  -1  -4  119.39    6.60
   4   1   4  123.59    8.00
  -4   1  -4  108.49    5.30
  -4   1  -4  107.19   10.90
   4   1   4  122.79    7.50
  -4   1  -4  104.99    7.20
  -4   1  -4  114.89    6.60
   4   1   4  117.39    8.80
  -4   1  -4  108.59    6.90
  -4   1  -4  122.29    6.40
   4   1   4  114.69    6.80
  -5  -1  -4  119.29    6.60
   5  -1   4  121.29    7.50
   5  -1   4  113.89    6.60
  -5  -1  -4  120.29    5.50
  -5  -1  -4  105.89    6.60
  -5   1  -4  110.99    6.20
   5   1   4  111.89    6.90
  -5   1  -4  117.39    5.40
   5   1   4  116.49    8.60
  -5   1  -4  112.79    6.70
   5   1   4  115.09    7.60
  -5   1  -4  128.49    8.10
  -6  -1  -4    3.00    0.90
   6  -1   4    3.60    1.60
  -6  -1  -4    1.50    1.00
   6  -1   4    2.40    1.40
  -6  -1  -4    2.40    1.10
  -6   1  -4    4.20    1.10
   6   1   4   -0.60    2.10
   6   1   4    2.60    1.90
   6   1   4    2.40    2.20
   6   1   4    5.50    1.70
  -6   1  -4    3.40    1.00
  -6   1  -4    2.20    1.40
   7  -1   4  237.28    9.00
  -7  -1  -4  259.97    7.80
  -8  -2   4   15.00    1.40
   8  -2  -4   12.30    1.70
   8   2  -4   13.80    2.50
  -7  -2   4   39.20    2.70
  -7  -2   4   38.80    3.50
   7  -2  -4   37.70    3.40
   7  -2  -4   37.50    4.30
  -7  -2   4   38.20    3.10
  -7  -2   4   39.90    3.60
   7  -2  -4   41.10    3.90
  -7   2   4   37.00    2.20
   7   2  -4   35.10    4.30
  -7   2   4   29.80    3.40
   7   2  -4   33.30    3.60
  -7   2   4   38.20    3.40
   7   2  -4   42.80    4.70
   7   2  -4   35.20    4.20
  -6  -2   4  581.14   20.10
  -6  -2   4  580.24   20.80
  -6  -2   4  566.54   19.40
  -6  -2   4  587.14   21.80
  -6   2   4  576.54   20.30
  -6   2   4  571.54   18.80
   6   2  -4  594.14   22.90
   6   2  -4  593.34   21.30
  -6   2   4  706.83   27.70
  -6   2   4  584.74   20.10
  -6   2   4  574.44   21.00
   6   2  -4  570.44   23.80
   6   2  -4  563.94   28.10
   6   2  -4  576.94   21.10
   6   2  -4  566.24   20.20
  -6   2   4  566.64   21.70
  -5  -2   4  691.13   24.60
  -5  -2   4  652.43   22.50
  -5  -2   4  663.03   23.20
  -5  -2   4  705.13   54.99
   5  -2  -4  665.83   22.90
  -5  -2   4  719.03   24.10
  -5  -2   4  709.83   32.60
   5   2  -4  699.13   23.80
   5   2  -4  712.63   31.20
  -5   2   4  682.03   23.20
   5   2  -4  698.93   23.90
   5   2  -4  697.63   26.40
   5   2  -4  680.53   23.40
  -5   2   4  691.93   22.00
  -5   2   4  667.73   26.70
  -5   2   4  679.43   24.10
  -5   2   4  653.23   25.00
  -5   2   4  646.04   33.30
  -5   2   4  677.33   23.50
   4  -2  -4  577.64   20.20
   4  -2  -4  589.54   21.70
  -4  -2   4  621.94   21.40
  -4  -2   4  611.64   45.80
  -4  -2   4  645.84   28.10
  -4  -2   4  616.64   21.80
  -4   2   4  603.84   19.60
   4   2  -4  616.44   21.00
  -4   2   4  595.64   20.80
  -4   2   4  607.34   23.90
  -4   2   4  618.64   20.70
   4   2  -4  605.74   20.60
  -4   2   4  679.33   29.70
  -4   2   4  630.34   21.60
   3  -2  -4  375.36   24.40
  -3  -2   4  344.07   13.20
   3  -2  -4  357.46   13.40
   3  -2  -4  357.46   13.00
  -3  -2   4  385.86   13.90
  -3   2   4  342.07   18.20
  -3   2   4  340.77   15.20
  -3   2   4  355.76   12.70
  -3   2   4  346.27   13.20
   2  -2  -4  485.95   21.20
   2  -2  -4  487.55   16.70
  -2  -2   4  496.65   17.10
  -2   2   4  507.15   32.10
   2   2  -4  498.15   24.50
  -1  -2   4  320.37   12.00
   1  -2  -4  326.47   11.30
   1  -2  -4  318.97   14.70
  -1   2   4  356.16   18.70
  -1   2   4  322.57   20.80
   0  -2  -4 2553.14   74.69
   0  -2  -4 2491.05   78.59
   0  -2   4 2547.65   75.89
   0  -2   4 2575.14   82.09
   0   2  -4 2681.83   78.99
  -1  -2  -4  307.37   13.70
  -1  -2  -4  293.67   10.30
   1  -2   4  310.37   11.90
  -1  -2  -4  283.77   15.30
  -1   2  -4  296.47   11.30
  -1   2  -4  290.87   10.50
  -1   2  -4  294.67   14.30
  -2  -2  -4 2220.38   74.39
  -2  -2  -4 2254.37   63.99
   2  -2   4 2168.18   65.69
  -2  -2  -4 2127.39   69.19
  -2   2  -4 2094.89   70.89
  -2   2  -4 2203.78   63.79
  -2   2  -4 2196.88   65.69
  -2   2  -4 2138.99   72.19
  -2   2  -4 2121.39   64.09
  -3  -2  -4  637.94   26.90
  -3  -2  -4  637.64   21.10
  -3  -2  -4  625.14   20.80
  -3   2  -4  659.33   23.10
   3   2   4  596.34   22.40
  -3   2  -4  642.04   28.50
  -3   2  -4  624.84   20.70
  -3   2  -4  600.34   19.60
  -3   2  -4  639.54   21.40
  -4  -2  -4  427.06   16.10
  -4  -2  -4  419.06   14.40
   4  -2   4  425.26   15.80
   4  -2   4  411.06   16.40
  -4  -2  -4  427.36   15.60
  -4  -2  -4  447.96   22.80
  -4   2  -4  423.96   16.10
   4   2   4  436.96   18.00
  -4   2  -4  416.36   15.40
   4   2   4  458.45   34.60
  -4   2  -4  404.06   16.10
  -4   2  -4  419.66   14.30
  -4   2  -4  407.56   23.80
   4   2   4  440.66   16.90
   4   2   4  447.76   17.70
   4   2   4  431.16   19.40
   5  -2   4  137.09    7.20
   5  -2   4  152.78    8.60
  -5  -2  -4  145.99    7.40
  -5  -2  -4  143.39    6.30
  -5  -2  -4  141.99    7.70
  -5   2  -4  147.49    7.60
  -5   2  -4  148.99    8.80
  -5   2  -4  130.79    7.50
   5   2   4  151.88   13.10
  -5   2  -4  147.49    6.10
   5   2   4  148.59    8.90
  -5   2  -4  145.69    7.00
   5   2   4  142.49    9.80
   5   2   4  152.98    8.20
   5   2   4  141.79    8.30
  -6  -2  -4    5.40    1.40
  -6  -2  -4    3.90    1.30
   6  -2   4    5.70    1.70
   6  -2   4    4.70    1.40
  -6  -2  -4    4.70    1.10
   6   2   4    4.80    1.90
   6   2   4    6.50    2.30
  -6   2  -4    5.80    1.00
  -6   2  -4    7.40    1.60
   6   2   4    4.80    2.30
   6   2   4    9.40    2.30
  -6   2  -4    3.40    1.80
   7  -2   4   15.70    1.70
  -7  -2  -4   18.40    1.30
   7  -2   4   12.70    2.60
   7   2   4   13.90    1.60
   8   3  -4   21.30    2.60
  -7  -3   4  121.59    5.30
   7  -3  -4  126.19    6.90
   7  -3  -4  135.39    7.10
   7  -3  -4  112.69    6.50
  -7  -3   4  123.89    6.40
  -7  -3   4  121.19    6.00
  -7   3   4  124.29    6.30
   7   3  -4  124.39    8.50
  -7   3   4  110.59    6.90
   7   3  -4  129.79    6.40
   7   3  -4  113.19    7.80
   7   3  -4  110.29    7.10
   6  -3  -4  170.08    8.30
  -6  -3   4  179.48    9.20
  -6  -3   4  166.38    7.80
  -6  -3   4  186.78    8.70
   6   3  -4  170.98    9.30
  -6   3   4  184.08    9.00
   6   3  -4  187.48    9.70
  -6   3   4  177.98    9.50
  -6   3   4  157.18   10.10
   6   3  -4  172.48   11.10
  -6   3   4  180.88    8.30
   6   3  -4  188.98   11.20
  -5  -3   4  131.89    6.60
  -5  -3   4  138.99    7.90
  -5  -3   4  130.49    7.00
  -5  -3   4  147.69   12.00
  -5  -3   4  132.09    7.50
  -5  -3   4  169.78   24.70
   5   3  -4  135.69    9.30
  -5   3   4  126.49    7.20
  -5   3   4  125.69    6.50
   5   3  -4  132.39    8.10
   5   3  -4  140.19    7.30
   5   3  -4  144.29    7.80
  -5   3   4  132.69    7.40
  -5   3   4  134.09   10.40
  -5   3   4  127.19    9.00
   5   3  -4  138.29   10.70
  -4  -3   4  906.51   58.39
   4  -3  -4  911.21   29.00
   4  -3  -4  902.11   31.20
   4  -3  -4  995.50   34.50
  -4  -3   4  923.81   31.20
  -4  -3   4  950.20   30.60
   4  -3  -4  965.70   31.60
   4  -3  -4  954.30   30.60
   4   3  -4 1080.29   37.40
   4   3  -4  943.41   30.20
  -4   3   4  879.11   38.80
  -4   3   4  961.30   33.70
  -4   3   4  926.51   32.10
  -4   3   4  946.91   29.70
   4   3  -4  985.50   31.90
  -4   3   4  943.81   32.50
  -4   3   4  933.81   30.50
   4   3  -4  799.62   41.90
  -4   3   4  910.51   28.50
   4   3  -4  925.91   29.70
   3  -3  -4   34.80    3.20
   3  -3  -4   50.59   12.40
   3  -3  -4   45.10    3.70
  -3  -3   4   39.50    3.60
  -3  -3   4   45.40    3.50
   3   3  -4   46.20    7.80
  -3   3   4   46.50    3.50
  -3   3   4   40.00    4.30
  -3   3   4   46.00    6.20
   2  -3  -4 4812.92  136.89
   2  -3  -4 4497.35  143.09
  -2  -3   4 4854.81  137.39
  -2   3   4 4465.35  142.19
  -2   3   4 4823.02  151.78
  -2   3   4 5016.40  139.29
  -2   3   4 4823.42  143.59
   2   3  -4 4589.74  150.88
   1  -3  -4 3198.98   92.89
   1  -3  -4 2834.92   97.49
  -1  -3   4 3263.87   93.99
  -1   3   4 3181.88   97.19
   1   3  -4 3361.86   93.19
  -1   3   4 3372.66   95.29
  -1   3   4 3221.08  109.59
   0  -3   4 1689.33   52.19
   0  -3  -4 1695.53   50.49
   0  -3   4 1700.13   56.49
   0   3  -4 1793.62   51.59
  -1  -3  -4 1134.89   41.50
   1  -3   4 1117.79   36.10
  -1  -3  -4 1128.19   38.20
  -1  -3  -4 1143.79   34.00
  -1   3  -4 1085.79   39.30
  -1   3  -4 1171.28   35.50
  -2  -3  -4 4504.05  129.79
   2  -3   4 4454.65  131.99
  -2  -3  -4 4526.65  135.29
   2  -3   4 4661.53  132.79
  -2  -3  -4 4242.28  129.59
  -2  -3  -4 4572.44  141.99
  -2   3  -4 4623.64  131.99
  -2   3  -4 4458.45  137.79
  -2   3  -4 4518.55  129.69
  -2   3  -4 4540.85  130.19
  -3  -3  -4  389.26   14.10
   3  -3   4  402.76   14.60
   3  -3   4  394.96   15.50
  -3  -3  -4  398.56   19.40
   3  -3   4  397.36   16.20
  -3  -3  -4  395.26   14.30
  -3   3  -4  389.86   15.00
   3   3   4  389.56   17.80
   3   3   4  366.86   20.70
  -3   3  -4  387.86   12.90
  -3   3  -4  412.86   16.40
   3   3   4  419.86   32.20
  -3   3  -4  378.76   21.40
  -3   3  -4  401.56   14.50
   3   3   4  399.96   15.40
  -3   3  -4  400.76   14.00
   4  -3   4   67.59    4.80
   4  -3   4   84.99    8.90
  -4  -3  -4   67.39    7.80
  -4  -3  -4   66.49    4.40
  -4  -3  -4   63.39    4.50
  -4  -3  -4   65.49    3.80
  -4   3  -4   61.49    5.50
   4   3   4   67.99    5.40
  -4   3  -4   62.89    4.10
  -4   3  -4   56.59    4.80
   4   3   4   72.19    9.00
   4   3   4   52.99    6.70
   4   3   4   61.19    7.60
   4   3   4   61.19    5.40
  -4   3  -4   63.79    4.60
   5  -3   4  266.17   13.20
  -5  -3  -4  302.97   12.30
   5  -3   4  285.27   11.50
  -5  -3  -4  301.17   11.90
  -5   3  -4  296.77   14.70
   5   3   4  296.47   15.10
   5   3   4  288.47   15.10
  -5   3  -4  293.07   10.60
   5   3   4  291.17   13.60
   5   3   4  285.07   12.90
  -5   3  -4  286.17   13.50
  -5   3  -4  270.77   10.70
   5   3   4  307.57   19.10
  -6  -3  -4   31.80    2.80
   6  -3   4   44.90    4.00
  -6  -3  -4   33.50    2.90
   6  -3   4   34.90    3.50
   6   3   4   31.50    4.90
  -6   3  -4   32.20    3.40
   6   3   4   35.00    4.20
  -6   3  -4   37.30    3.00
   6   3   4   46.70    5.00
   7  -3   4    3.00    0.90
   7   3   4    1.40    0.90
  -7  -4   4   70.19    5.10
   7  -4  -4   67.39    4.20
   7  -4  -4   74.49    4.60
  -7  -4   4   71.89    3.50
   7  -4  -4   69.49    5.40
   7   4  -4   72.29    5.60
  -7   4   4   67.99    5.00
   7   4  -4   57.59    5.40
  -7   4   4   73.49    4.40
   7   4  -4   71.69    4.90
  -6  -4   4   46.70    4.20
  -6  -4   4   41.10    3.40
  -6  -4   4   44.60    3.30
  -6  -4   4   44.90    3.80
   6  -4  -4   45.00    3.60
   6   4  -4   40.90    3.70
   6   4  -4   42.10    4.00
   6   4  -4   38.30    5.20
   6   4  -4   44.10    7.10
   6   4  -4   40.40    5.00
  -6   4   4   44.80    4.40
  -6   4   4   48.40    3.70
   6   4  -4   45.50    4.90
  -6   4   4   45.60    4.80
  -5  -4   4  189.98   25.00
  -5  -4   4  191.68    8.90
  -5  -4   4  202.98   10.00
  -5  -4   4  193.28   15.20
   5  -4  -4  205.88    8.60
   5  -4  -4  199.28    9.30
  -5  -4   4  196.98    8.70
   5   4  -4  212.58   10.10
  -5   4   4  200.08   10.60
   5   4  -4  204.18    9.50
   5   4  -4  200.68    9.80
   5   4  -4  185.88   10.80
  -5   4   4  199.28    7.10
   5   4  -4  206.18   15.40
  -5   4   4  205.08   11.70
   5   4  -4  199.18   12.10
  -5   4   4  196.78    8.90
   5   4  -4  194.78    9.30
  -4  -4   4  256.57   11.10
   4  -4  -4  240.88   10.40
   4  -4  -4  247.48   10.00
  -4  -4   4  257.97   30.00
   4  -4  -4  263.17   11.50
   4  -4  -4  256.97   11.90
  -4  -4   4  272.17   13.60
   4   4  -4  265.27   13.30
   4   4  -4  268.27   10.90
  -4   4   4  259.77   13.30
  -4   4   4  265.07   12.30
   4   4  -4  273.87   16.40
  -4   4   4  267.87    9.10
   4   4  -4  264.97   12.20
   4   4  -4  254.27   11.40
   4   4  -4  272.87   11.30
   4   4  -4  274.67   11.00
  -4   4   4  250.87   10.50
   3  -4  -4  814.82   44.50
   3  -4  -4  830.62   27.50
  -3  -4   4  833.52   27.70
   3  -4  -4  841.02   28.00
  -3  -4   4  825.02   27.40
   3   4  -4  828.82   43.20
  -3   4   4  873.51   29.90
   2  -4  -4 1045.10   39.70
   2  -4  -4 1144.59   34.80
  -2  -4   4 1028.90   33.10
   2  -4  -4 1044.40   33.10
  -2   4   4 1032.50   34.60
   2   4  -4  992.20   46.80
  -2   4   4 1035.80   38.00
   1  -4  -4  711.63   27.20
  -1  -4   4  657.73   22.40
   1  -4  -4  648.74   21.40
   1   4  -4  665.93   21.40
  -1   4   4  687.43   23.10
  -1   4   4  669.83   36.80
   0  -4  -4 1475.85   45.50
   0  -4   4 1505.85   47.50
   0  -4   4 1506.55   51.59
   0   4   4 1728.13   49.70
   0   4   4 1509.45   64.99
   0   4  -4 1525.15   46.50
  -1  -4  -4  642.24   24.30
   1  -4   4  721.33   26.10
  -1  -4  -4  615.34   20.00
  -1  -4  -4  591.14   26.90
   1  -4   4  610.74   22.40
   1   4   4  653.63   38.90
  -1   4  -4  627.54   21.50
  -1   4  -4  596.14   25.50
   1   4   4  683.43   21.70
   2  -4   4  192.98    9.80
  -2  -4  -4  196.18    7.70
  -2  -4  -4  190.98    7.60
  -2  -4  -4  191.88   13.50
  -2  -4  -4  187.68   10.90
   2  -4   4  189.78    9.90
   2   4   4  195.28   21.10
  -2   4  -4  193.98   12.90
  -2   4  -4  185.18    9.00
  -3  -4  -4  653.33   28.00
  -3  -4  -4  633.34   20.70
   3  -4   4  596.24   21.10
   3  -4   4  611.34   22.50
   3  -4   4  590.74   23.00
   3  -4   4  612.04   22.00
   3   4   4  594.34   23.00
   3   4   4  612.64   22.10
   3   4   4  603.34   22.70
   3   4   4  613.74   41.90
   3   4   4  616.94   26.00
   3   4   4  612.24   22.70
   3   4   4  614.24   25.00
   3   4   4  608.64   23.40
  -3   4  -4  590.74   22.60
   3   4   4  605.24   29.20
  -3   4  -4  581.64   21.20
   4  -4   4  187.38    9.70
  -4  -4  -4  180.18    8.50
   4  -4   4  177.38    7.80
  -4  -4  -4  175.48    8.30
  -4  -4  -4  168.48    7.30
  -4   4  -4  182.38   10.10
   4   4   4  183.08   10.90
  -4   4  -4  172.48    6.60
   4   4   4  182.48    9.60
   4   4   4  181.28   10.50
   4   4   4  188.18   15.00
   4   4   4  185.58   12.10
   4   4   4  184.18   10.30
   4   4   4  183.48    9.80
   4   4   4  209.98   12.70
  -4   4  -4  190.98    9.20
   5  -4   4   71.39    5.10
   5  -4   4   66.99    4.40
  -5  -4  -4   73.59    3.90
  -5  -4  -4   70.79    4.70
  -5  -4  -4   69.19    4.60
   5   4   4   70.39    5.60
  -5   4  -4   71.59    5.10
  -5   4  -4   65.09    3.20
   5   4   4   78.59    7.30
   5   4   4   72.29    8.60
  -5   4  -4   69.49    5.60
   5   4   4   67.49    5.70
   6  -4   4   17.90    2.60
  -6  -4  -4   12.50    2.10
  -6  -4  -4   20.80    1.70
  -6   4  -4   13.50    2.30
   6   4   4   12.20    2.10
   6   4   4   19.60    4.20
  -6   4  -4   17.80    2.10
   6   4   4   15.50    3.20
   7  -5  -4   38.80    2.90
   7  -5  -4   37.30    2.90
  -7  -5   4   43.60    2.40
  -7  -5   4   43.00    2.90
  -7   5   4   42.30    3.10
   7   5  -4   46.30    4.20
   7   5  -4   43.80    3.70
  -7   5   4   35.10    3.30
   7   5  -4   41.20    4.30
  -6  -5   4   15.00    2.10
  -6  -5   4   15.70    2.60
   6  -5  -4   15.70    2.50
  -6  -5   4   14.70    2.50
   6   5  -4   16.20    2.70
   6   5  -4   15.20    2.60
   6   5  -4   15.70    3.10
  -6   5   4   14.80    3.00
   6   5  -4   12.10    3.50
   6   5  -4   14.70    3.60
  -6   5   4   15.10    2.90
   6   5  -4   19.50    6.10
  -5  -5   4   53.89    4.40
   5  -5  -4   49.90    4.80
  -5  -5   4   52.29    4.70
   5  -5  -4   51.09    5.20
  -5  -5   4   51.59    3.80
   5  -5  -4   54.19    4.40
   5   5  -4   54.39    5.00
   5   5  -4   59.89    8.20
   5   5  -4   54.29    4.40
   5   5  -4   54.39    4.70
   5   5  -4   53.49    4.40
   5   5  -4   59.89    6.50
  -5   5   4   57.99    4.00
  -5   5   4   57.09    5.10
   5   5  -4   57.09    6.00
  -5   5   4   52.59    5.30
  -4  -5   4  284.07   32.00
   4  -5  -4  270.87   12.60
   4  -5  -4  255.37   10.90
  -4  -5   4  258.37   11.70
   4  -5  -4  268.67   10.50
  -4  -5   4  264.17   11.50
   4  -5  -4  266.47   12.00
  -4   5   4  269.27   13.40
  -4   5   4  269.57   12.50
   4   5  -4  269.87   11.70
  -4   5   4  252.97   10.50
   4   5  -4  253.77   12.80
   4   5  -4  283.37   14.40
   4   5  -4  278.17   17.40
   4   5  -4  272.17   11.30
   4   5  -4  263.57   11.50
   4   5  -4  260.37   11.30
   3  -5  -4  259.87   10.30
   3  -5  -4  262.37   11.80
   3  -5  -4  270.17   10.50
  -3  -5   4  243.58   10.90
   3  -5  -4  256.37   24.20
   3  -5  -4  261.07   11.70
  -3  -5   4  265.17   11.20
   3   5  -4  265.87   13.10
   3   5  -4  263.97   15.80
   3   5  -4  274.87   10.90
   3   5  -4  273.87   11.20
  -3   5   4  264.67   12.60
   3   5  -4  257.47   23.60
   2  -5  -4  705.23   23.60
  -2  -5   4  685.63   24.10
   2  -5  -4  732.03   24.30
  -2  -5   4  732.93   24.20
  -2   5   4  730.53   25.30
   2   5  -4  738.03   40.10
   1  -5  -4  586.44   25.10
  -1  -5   4  582.94   20.20
   1  -5  -4  557.04   18.90
   1  -5  -4  586.54   19.30
   1   5  -4  580.24   18.60
  -1   5   4  580.74   20.20
  -1   5   4  587.74   35.50
   0  -5   4 1921.41   64.49
   0  -5   4 1946.71   60.89
   0   5   4 1992.60   59.19
   0   5   4 1951.70   83.09
   0   5   4 2140.59   73.59
   0   5  -4 2024.20   59.49
  -1  -5  -4  309.77   11.00
   1  -5   4  323.67   13.50
   1  -5   4  321.87   13.70
  -1   5  -4  325.87   12.60
   1   5   4  282.47   26.10
  -2  -5  -4 1550.14   45.80
   2  -5   4 1458.15   47.60
   2  -5   4 1552.54   49.80
  -2  -5  -4 1490.55   45.80
   2  -5   4 1481.75   47.90
  -2  -5  -4 1581.94   51.09
   2   5   4 1592.04   57.09
   2   5   4 1521.55   73.89
   2   5   4 1546.35   49.70
   2   5   4 1520.45   48.60
   2   5   4 1511.75   49.40
  -2   5  -4 1443.86   47.00
  -2   5  -4 1578.54   48.30
   2   5   4 1594.64   52.99
   2   5   4 1562.74   53.09
   2   5   4 1524.85   49.10
   3  -5   4 1220.98   40.70
   3  -5   4 1238.58   39.20
   3  -5   4 1186.78   41.30
  -3  -5  -4 1257.37   37.90
  -3  -5  -4 1177.38   37.50
  -3  -5  -4 1273.97   43.80
   3  -5   4 1202.08   39.90
   3   5   4 1195.28   43.50
   3   5   4 1228.58   40.80
  -3   5  -4 1228.58   39.00
   3   5   4 1265.57   49.10
   3   5   4 1249.18   40.90
   3   5   4 1186.68   41.10
   3   5   4 1130.59   63.49
  -3   5  -4 1251.67   40.50
   3   5   4 1259.47   44.90
   3   5   4 1198.48   41.60
  -4  -5  -4  568.14   19.30
   4  -5   4  588.64   21.60
  -4  -5  -4  572.24   19.70
   4  -5   4  557.94   19.40
   4   5   4  553.44   21.20
   4   5   4  548.95   24.50
  -4   5  -4  560.84   20.40
   4   5   4  579.64   22.60
   4   5   4  546.05   24.70
   4   5   4  572.84   22.30
   4   5   4  586.04   29.40
  -4   5  -4  547.35   21.80
   4   5   4  568.04   22.60
  -5  -5  -4  160.78    7.20
   5  -5   4  161.28    8.10
  -5  -5  -4  165.98    6.40
  -5  -5  -4  156.68    7.40
   5   5   4  156.28   12.40
   5   5   4  156.28    8.60
  -5   5  -4  148.79    8.60
  -5   5  -4  154.48    7.80
   5   5   4  155.18   10.30
   5   5   4  150.28    8.80
  -6  -5  -4   18.30    1.90
   6  -5   4   18.40    2.20
  -6  -5  -4   18.60    1.50
   6   5   4   14.60    3.00
  -6   5  -4   15.70    2.50
   6   5   4   14.10    2.30
  -6   5  -4   22.60    2.40
   6   5   4   14.60    3.30
  -7  -6   4  245.78    7.90
   7  -6  -4  262.67    9.00
   7   6  -4  218.68   11.70
  -7   6   4  250.37    9.00
  -6  -6   4   19.70    2.00
  -6  -6   4   20.60    2.30
  -6  -6   4   15.00    2.40
   6  -6  -4   21.30    2.50
   6   6  -4   18.70    2.70
   6   6  -4   16.60    3.60
   6   6  -4   13.50    4.50
  -6   6   4   15.10    2.90
   6   6  -4   29.50    7.10
  -6   6   4   18.90    2.70
   6   6  -4   15.40    3.00
   5  -6  -4   68.19    5.20
   5  -6  -4   59.29    5.40
   5  -6  -4   69.09    5.00
  -5  -6   4   71.99    4.80
  -5  -6   4   58.29    4.10
   5   6  -4   73.99    5.90
  -5   6   4   63.49   10.30
  -5   6   4   61.19    5.30
   5   6  -4   61.59    8.70
   5   6  -4   66.29    5.00
   5   6  -4   59.89    6.70
   5   6  -4   69.29    5.00
   4  -6  -4  118.29    6.30
   4  -6  -4  119.89    7.40
  -4  -6   4  132.09    9.50
   4  -6  -4  120.29    7.90
  -4  -6   4  118.09    6.70
   4  -6  -4  119.99    6.60
  -4  -6   4  119.09    7.00
  -4   6   4  127.19    7.70
  -4   6   4   95.69    6.60
   4   6  -4  124.19    9.30
   4   6  -4  122.09    7.30
   4   6  -4  122.99   11.40
  -4   6   4  116.69    8.00
   4   6  -4  120.19    6.90
   4   6  -4  119.19    6.80
   3  -6  -4  696.63   25.00
   3  -6  -4  700.73   23.20
   3  -6  -4  657.93   43.80
  -3  -6   4  691.43   26.20
   3  -6  -4  688.93   22.50
   3  -6  -4  730.73   24.70
  -3   6   4  692.33   25.40
   3   6  -4  662.53   23.50
   3   6  -4  659.83   23.70
  -3   6   4  704.93   25.70
   3   6  -4  719.33   23.50
   3   6  -4  723.23   27.30
   3   6  -4  690.83   43.80
   3   6  -4  743.83   30.70
  -3   6   4  668.53   24.50
   2  -6  -4 1056.29   53.09
  -2  -6   4 1085.69   34.10
   2  -6  -4 1068.19   33.70
  -2  -6   4 1039.60   34.00
  -2   6   4 1111.69   34.90
   2   6  -4 1028.00   54.59
   2   6  -4 1026.90   33.70
   2   6  -4 1051.69   39.00
  -2   6   4  987.70   33.90
  -2   6   4 1044.80   36.00
  -1  -6   4  442.06   16.40
   1  -6  -4  434.06   21.40
   1  -6  -4  418.06   15.00
  -1  -6   4  422.36   16.20
   1  -6  -4  435.56   15.40
  -1   6   4  437.86   15.60
   1   6  -4  430.06   31.30
   0  -6  -4  773.62   24.50
   0  -6   4  731.73   26.20
   0  -6   4  776.32   26.60
   0  -6  -4  730.93   31.50
   0   6   4  806.92   38.80
   0   6  -4  781.12   24.60
   0   6   4  753.02   45.90
   1  -6   4  794.52   27.20
   1  -6   4  898.81   30.50
   1  -6   4  840.12   28.60
  -1  -6  -4  789.12   24.80
   1  -6   4  813.62   28.40
  -1   6  -4  738.93   25.40
   1   6   4  811.82   29.00
   1   6   4  768.52   27.80
   1   6   4  780.62   27.40
   1   6   4  810.82   49.40
   1   6   4  808.52   34.30
  -1   6  -4  794.42   26.40
   1   6   4  722.93   29.40
   1   6   4  744.23   28.90
   2  -6   4  590.14   21.70
   2  -6   4  567.84   21.90
   2  -6   4  611.44   23.40
  -2  -6  -4  621.04   19.90
   2  -6   4  613.34   23.90
   2   6   4  595.34   22.70
  -2   6  -4  626.74   21.10
   2   6   4  625.74   23.20
   2   6   4  661.63   44.60
   2   6   4  624.34   23.70
   2   6   4  609.54   23.10
   2   6   4  649.24   29.90
   2   6   4  605.14   23.40
  -2   6  -4  623.24   22.20
   2   6   4  588.74   25.30
   3  -6   4  367.36   16.40
   3  -6   4  380.96   15.80
   3  -6   4  384.56   17.30
  -3  -6  -4  366.76   13.50
  -3  -6  -4  371.36   13.60
   3  -6   4  367.36   15.20
  -3   6  -4  363.96   15.70
  -3   6  -4  392.06   14.80
   3   6   4  381.56   16.90
   3   6   4  384.76   16.40
   3   6   4  374.46   17.20
   3   6   4  391.46   22.70
   3   6   4  375.66   16.30
   3   6   4  370.76   18.80
   4  -6   4  227.18   10.70
  -4  -6  -4  229.88    9.40
  -4  -6  -4  227.48    9.50
   4  -6   4  232.18    9.90
   4  -6   4  238.98   11.50
   4   6   4  235.48   16.60
   4   6   4  233.98   13.00
  -4   6  -4  232.38   11.40
  -4   6  -4  230.48   10.40
   4   6   4  235.48   12.00
   4   6   4  221.48   11.70
   4   6   4  214.68   13.70
   5  -6   4  115.99    6.50
  -5  -6  -4  116.39    4.80
  -5  -6  -4  114.89    5.70
  -5  -6  -4  117.39    5.60
  -5   6  -4  116.19    6.10
  -5   6  -4  121.29    7.00
   5   6   4  114.39    9.70
   5   6   4  122.49    8.70
   5   6   4  105.79    6.80
   6  -6   4   16.40    2.00
   6   6   4   15.20    3.40
  -6   6  -4   17.00    1.40
  -6   6  -4   18.60    1.70
   7  -7  -4    9.90    1.20
   7   7  -4   11.00    2.10
   7   7  -4    8.30    1.40
  -7   7   4   12.90    1.20
  -6  -7   4   32.30    2.70
  -6  -7   4   31.80    2.20
  -6  -7   4   33.50    2.80
   6  -7  -4   33.20    3.00
   6   7  -4   32.90    3.60
  -6   7   4   32.40    3.00
   6   7  -4   33.40    4.30
  -6   7   4   32.30    3.10
   6   7  -4   31.50    4.30
   6   7  -4   33.60    2.90
   5  -7  -4  228.78   10.90
  -5  -7   4  237.78   10.00
   5  -7  -4  248.98   10.30
  -5  -7   4  237.98   10.30
   5  -7  -4  246.38   10.50
  -5   7   4  250.07   11.30
   5   7  -4  261.77   11.70
   5   7  -4  240.38   17.00
   5   7  -4  244.18   12.00
   5   7  -4  251.57   14.10
  -5   7   4  242.28   11.70
   5   7  -4  241.48   10.40
   5   7  -4  246.08   10.70
   4  -7  -4  114.39    6.40
  -4  -7   4  117.29    6.40
   4  -7  -4  100.79    7.10
   4  -7  -4  107.99    6.00
   4   7  -4  109.99    7.10
  -4   7   4  109.89    7.00
   4   7  -4  110.49    9.10
   4   7  -4  109.09   11.00
  -4   7   4  112.59    7.40
   4   7  -4  105.19    6.40
   4   7  -4  105.49    6.40
  -3  -7   4 1723.13   54.09
  -3  -7   4 1646.64   53.69
   3  -7  -4 1822.72   85.09
   3  -7  -4 1794.42   53.89
   3  -7  -4 1735.63   55.39
   3   7  -4 1780.32   68.19
  -3   7   4 1735.83   56.09
  -3   7   4 1714.13   54.79
   3   7  -4 1757.32   58.29
   3   7  -4 1619.94   53.59
   3   7  -4 1936.21   60.49
   3   7  -4 1679.73   83.09
  -2  -7   4 1151.28   43.10
   2  -7  -4 1169.68   37.10
   2  -7  -4 1104.49   35.20
   2  -7  -4 1135.09   37.60
   2  -7  -4 1116.69   35.80
   2  -7  -4 1187.68   60.39
   2   7  -4 1190.38   62.29
   2   7  -4 1207.68   43.70
  -2   7   4 1153.18   36.80
   2   7  -4 1140.09   42.80
  -2   7   4 1145.79   39.60
  -2   7   4 1134.79   36.80
   2   7  -4 1177.78   37.20
   1  -7  -4 1497.15   47.00
   1  -7  -4 1480.75   46.70
  -1  -7   4 1489.55   47.60
  -1  -7   4 1484.55   47.50
   1  -7  -4 1482.95   55.09
  -1   7   4 1525.65   49.80
  -1   7   4 1465.45   48.10
   1   7  -4 1488.55   44.30
   1   7  -4 1504.85   47.10
  -1   7   4 1512.45   44.80
   1   7  -4 1542.05   52.09
  -1   7   4 1587.64   55.49
  -1   7   4 1545.85   68.09
   1   7  -4 1450.85   77.29
   0  -7   4   41.00    4.80
   0  -7  -4   51.79    3.60
   0  -7   4   51.79    5.10
   0  -7  -4   57.09    7.40
   0  -7  -4   51.89    3.70
   0  -7   4   45.40    5.60
   0  -7   4   43.10    4.50
   0   7  -4   49.90    4.00
   0   7   4   53.69    5.20
   0   7  -4   45.00    4.00
   0   7   4   67.79    9.00
   0   7   4   51.89    4.80
   0   7   4   70.39   14.70
   0   7   4   59.89    5.10
   0   7   4   53.29    7.10
   0   7  -4   49.60    3.20
   1  -7   4   82.49    6.50
   1  -7   4   63.29    5.30
  -1  -7  -4   85.79    4.50
   1  -7   4   79.49    6.30
   1  -7   4   74.69    5.60
   1   7   4   79.99    6.40
   1   7   4   85.59    6.80
  -1   7  -4   79.69    4.90
   1   7   4   81.19    6.30
  -1   7  -4   89.99    5.70
   1   7   4   79.49    8.10
  -1   7  -4   79.49    4.60
   1   7   4   78.29    9.30
   2  -7   4 1424.66   48.50
  -2  -7  -4 1448.56   44.30
   2  -7   4 1406.56   49.00
   2  -7   4 1473.95   48.60
   2  -7   4 1455.95   47.50
   2   7   4 1456.75   48.60
  -2   7  -4 1443.76   46.50
   2   7   4 1466.75   48.70
   2   7   4 1722.73   75.69
   2   7   4 1451.95   53.79
   2   7   4 1472.85   48.70
  -3  -7  -4  112.79    5.60
   3  -7   4  126.49    8.30
   3  -7   4  115.29    9.70
  -3  -7  -4  112.29    6.00
   3  -7   4  127.39    7.70
   3  -7   4  120.79    7.60
   3   7   4  103.79    9.40
   3   7   4  115.09   11.60
   3   7   4  117.09    7.80
  -3   7  -4  111.19    7.10
  -3   7  -4  114.09    6.60
   3   7   4  121.99    8.40
   3   7   4  111.89    7.40
  -4  -7  -4   51.69    3.50
  -4  -7  -4   52.19    3.60
   4  -7   4   57.19    5.10
   4  -7   4   65.89    4.70
   4  -7   4   62.59    4.90
   4   7   4   62.09    5.40
   4   7   4   51.79    7.20
   4   7   4   60.09    5.50
   4   7   4   55.59    6.70
  -4   7  -4   54.29    4.20
   4   7   4   58.99    4.50
  -4   7  -4   59.49    4.90
   5  -7   4   44.70    3.70
  -5   7  -4   45.10    3.20
  -5   7  -4   38.80    3.40
   5   7   4   35.30    5.50
   5   7   4   39.50    5.10
   6  -7   4   46.10    2.80
  -6   7  -4   51.69    2.80
   6  -8  -4   48.20    3.10
  -6   8   4   47.40    3.00
   6   8  -4   37.20    4.00
   6   8  -4   43.00    3.40
   6   8  -4   40.30    2.90
   5  -8  -4  159.58    7.40
  -5  -8   4  144.59    6.90
   5  -8  -4  157.18    7.50
   5  -8  -4  164.38    8.10
   5   8  -4  156.98    7.60
  -5   8   4  173.48   10.00
   5   8  -4  155.68   10.20
   5   8  -4  155.38    7.40
   5   8  -4  149.49   12.60
  -5   8   4  155.58    7.60
   5   8  -4  162.08    8.20
  -4  -8   4   13.70    2.50
   4  -8  -4   10.00    2.80
  -4  -8   4   13.90    3.30
   4  -8  -4   17.20    3.50
   4   8  -4   17.10    3.50
   4   8  -4   16.20    5.90
   4   8  -4   21.20    4.50
  -4   8   4   14.90    3.00
   3  -8  -4   40.00    3.60
   3  -8  -4   42.00    4.20
  -3  -8   4   43.50    3.90
   3  -8  -4   38.40    4.30
  -3  -8   4   38.30    4.10
   3  -8  -4   42.50    3.40
  -3   8   4   43.90    4.00
  -3   8   4   40.20    3.70
   3   8  -4   50.59    7.10
   3   8  -4   42.60    5.50
  -3   8   4   40.70    4.60
   3   8  -4   44.90    5.30
   3   8  -4   37.80    3.80
   3   8  -4   43.40    3.80
   2  -8  -4  851.51   51.49
   2  -8  -4  860.01   28.30
  -2  -8   4  824.02   28.30
   2  -8  -4  843.52   29.00
  -2  -8   4  789.02   28.10
  -2   8   4  759.42   47.50
   2   8  -4  822.02   31.50
   2   8  -4  859.41   28.20
  -2   8   4  801.72   30.40
  -2   8   4  801.02   27.00
   2   8  -4  839.12   27.20
   2   8  -4  853.51   35.00
   2   8  -4  799.22   51.79
  -2   8   4  823.22   26.10
   1  -8  -4  395.36   15.40
  -1  -8   4  389.86   16.20
  -1  -8   4  390.66   16.10
   1  -8  -4  395.16   14.90
   1  -8  -4  376.36   13.60
   1  -8  -4  397.46   31.10
  -1   8   4  394.96   30.90
  -1   8   4  403.26   16.50
  -1   8   4  388.36   13.60
   1   8  -4  377.96   32.80
  -1   8   4  406.96   18.10
   1   8  -4  383.26   19.30
   1   8  -4  412.26   15.80
   0  -8   4 1308.67   43.50
   0  -8  -4 1339.17   42.20
   0  -8   4 1260.27   43.50
   0  -8   4 1391.76   45.10
   0  -8  -4 1408.66   52.59
   0  -8   4 1403.06   45.60
   0  -8  -4 1374.46   42.60
   0   8   4 1433.46   53.29
   0   8   4 1406.26   45.50
   0   8  -4 1435.56   44.00
   0   8  -4 1336.97   41.00
   0   8   4 1400.76   47.20
   0   8  -4 1410.06   71.89
   0   8   4 1412.16   47.10
   0   8   4 1354.16   63.39
   1  -8   4  818.12   30.50
  -1  -8  -4  904.21   37.30
  -1  -8  -4  835.92   27.20
   1  -8   4  922.01   33.10
   1  -8   4  847.62   31.20
   1   8   4  878.31   32.60
  -1   8  -4  796.72   26.90
   1   8   4  881.91   31.90
   1   8   4  853.81   37.60
  -1   8  -4  836.22   28.90
  -1   8  -4  842.22   27.00
   1   8   4  855.91   30.60
   2  -8   4   13.50    3.20
   2  -8   4   12.70    3.40
   2  -8   4   17.60    3.40
  -2  -8  -4   19.40    2.30
   2  -8   4   12.80    3.70
   2   8   4   17.40    4.00
   2   8   4   16.30    4.00
   2   8   4   16.50    5.10
   2   8   4   16.20    5.50
  -2   8  -4   16.60    2.80
  -2   8  -4   13.80    2.60
   2   8   4   14.30    3.20
  -2   8  -4   18.00    3.40
  -3  -8  -4   80.59    4.40
   3  -8   4   79.29    6.70
   3  -8   4   74.69    7.50
   3  -8   4   76.29    6.60
  -3   8  -4   75.99    5.20
  -3   8  -4   78.49    6.20
  -3   8  -4   72.49    5.90
   3   8   4   70.99    5.50
   3   8   4   77.19    5.80
   3   8   4   87.89   12.80
   3   8   4   79.19   18.00
   4  -8   4  313.97   11.70
   4  -8   4  296.97   13.20
   4  -8   4  324.77   13.10
   4   8   4  321.47   17.70
   4   8   4  317.47   15.40
  -4   8  -4  294.47   12.00
  -4   8  -4  288.07   12.10
  -4   8  -4  309.47   11.80
   5   8   4   89.39    6.20
  -5   8  -4  103.99    4.60
   5   8   4  104.39    6.70
  -5   8  -4   88.19    4.50
   6  -9  -4    8.00    1.40
  -6   9   4    5.10    1.00
   6   9  -4    9.00    1.40
   5  -9  -4  101.39    5.10
   5  -9  -4  106.09    5.40
   5   9  -4   99.99    7.10
   5   9  -4  103.99    5.10
  -5   9   4  103.19    5.00
   5   9  -4  102.69    5.50
   5   9  -4   93.39    5.10
   4  -9  -4   18.10    2.80
   4  -9  -4   14.20    3.10
   4  -9  -4   20.00    2.60
   4  -9  -4   18.10    3.50
  -4  -9   4   21.60    2.50
  -4  -9   4   23.90    3.00
   4   9  -4   22.90    2.70
  -4   9   4   21.00    2.50
   4   9  -4   17.10    4.00
  -4   9   4   20.60    2.10
   4   9  -4   25.40    6.10
   4   9  -4   20.60    3.40
   4   9  -4   23.50    2.60
   3  -9  -4  276.47   11.50
   3  -9  -4  272.57   13.20
   3  -9  -4  274.37   12.50
  -3  -9   4  278.07   11.70
   3   9  -4  286.57   13.70
  -3   9   4  293.07   11.20
   3   9  -4  291.07   14.70
  -3   9   4  263.27   12.60
   3   9  -4  268.57   17.10
   2  -9  -4  431.46   17.50
  -2  -9   4  419.26   16.60
   2  -9  -4  408.26   16.60
   2  -9  -4  406.36   14.80
  -2  -9   4  407.66   16.50
   2  -9  -4  416.76   15.20
  -2   9   4  431.16   18.60
   2   9  -4  426.86   15.60
  -2   9   4  425.56   14.40
   2   9  -4  435.06   16.50
   2   9  -4  427.16   21.70
   1  -9  -4 1228.78   39.20
  -1  -9   4 1188.38   39.70
   1  -9  -4 1144.29   36.70
   1  -9  -4 1201.78   38.50
  -1  -9   4 1229.98   40.10
  -1   9   4 1178.98   41.90
   1   9  -4 1229.08   44.00
   1   9  -4 1217.28   39.00
   0  -9  -4  113.99    6.20
   0  -9   4  112.89    7.20
   0  -9   4  134.79    8.40
   0  -9   4  122.29    7.50
   0  -9  -4  131.09    6.90
   0  -9   4  125.19    8.10
   0   9   4  132.79   13.00
   0   9  -4  126.89    7.40
   0   9   4  128.49    9.10
   0   9   4  128.19    8.20
   1  -9   4   26.80    3.50
   1  -9   4   23.80    3.70
   1  -9   4   22.80    4.30
  -1  -9  -4   22.10    2.90
   1  -9   4   26.10    4.30
  -1  -9  -4   25.50    2.60
  -1   9  -4   25.00    3.30
   1   9   4   31.40    4.80
   1   9   4   20.40    4.00
  -1   9  -4   24.90    2.20
   1   9   4   31.10    6.50
   1   9   4   30.10    7.60
  -2  -9  -4  320.37   11.30
   2  -9   4  299.87   14.50
   2  -9   4  292.67   15.50
   2  -9   4  282.57   14.40
   2  -9   4  294.97   17.70
   2   9   4  338.57   18.60
  -2   9  -4  284.67   12.60
   2   9   4  311.47   22.20
  -2   9  -4  286.97   12.90
   2   9   4  289.07   13.70
  -2   9  -4  302.07   10.50
   3  -9   4   14.20    3.10
   3  -9   4   14.90    3.20
   3  -9   4   18.20    3.20
   3  -9   4   19.70    3.90
  -3   9  -4   21.10    2.70
   3   9   4   21.20    4.90
  -3   9  -4   19.00    2.20
   3   9   4   19.30    5.20
  -3   9  -4   19.50    2.40
   3   9   4   18.10    3.10
   4  -9   4  113.79    6.20
   4  -9   4  116.79    5.20
   4   9   4  112.49    8.60
  -4   9  -4  117.09    5.20
   4   9   4  107.69    7.70
  -4   9  -4  113.19    5.70
   5  -9   4  132.39    5.90
  -5   9  -4  143.39    5.60
  -5   9  -4  140.79    4.90
   5 -10  -4   88.29    4.80
   5  10  -4  102.49    4.40
   4 -10  -4   54.79    4.50
   4 -10  -4   53.19    3.50
   4 -10  -4   44.20    4.30
   4 -10  -4   45.60    4.40
   4  10  -4   46.60    6.00
  -4  10   4   50.09    2.70
   4  10  -4   48.00    3.50
   4  10  -4   47.30    3.40
   3 -10  -4    0.80    1.50
   3 -10  -4    1.80    1.60
   3 -10  -4    0.70    1.10
  -3 -10   4   -3.20    1.20
   3  10  -4    1.00    2.30
   3  10  -4    0.70    1.10
   3  10  -4    1.80    1.10
  -3  10   4   -0.20    1.10
  -3  10   4    0.30    1.50
   2 -10  -4  174.38    7.90
   2 -10  -4  183.48    9.00
   2 -10  -4  180.58    7.60
  -2 -10   4  171.58    8.80
   2 -10  -4  174.88    9.40
  -2 -10   4  178.68    8.80
  -2  10   4  167.58    9.80
   2  10  -4  180.98    8.70
   2  10  -4  177.28    8.00
   2  10  -4  174.58   11.80
   1 -10  -4  293.67   12.40
  -1 -10   4  277.27   12.80
   1 -10  -4  277.37   12.00
   1 -10  -4  275.47   10.40
  -1 -10   4  277.77   12.70
  -1  10   4  270.97   15.00
   1  10  -4  286.77   11.10
   1  10  -4  286.87   13.30
   0 -10   4    6.00    2.20
   0 -10  -4   13.00    2.50
   0 -10   4    9.90    2.60
   0 -10   4   10.80    2.90
   0 -10  -4   13.50    2.50
   0  10  -4    9.80    3.00
   0  10   4    8.60    3.10
   1 -10   4  206.48   11.20
   1 -10   4  220.78   11.30
   1 -10   4  207.68    9.90
  -1 -10  -4  221.48    9.10
  -1 -10  -4  174.18    8.70
   1 -10   4  211.68    9.70
   1  10   4  227.38   16.10
  -1  10  -4  208.88    9.80
   1  10   4  215.88   11.40
   2 -10   4   55.19    4.40
   2 -10   4   51.49    6.30
   2 -10   4   61.09    5.10
   2 -10   4   53.79    5.20
   2  10   4   60.79    5.30
   2  10   4   57.89    8.20
  -2  10  -4   53.39    2.80
  -2  10  -4   55.49    4.30
   3 -10   4   14.30    2.40
   3 -10   4   19.00    3.20
   3 -10   4    8.90    2.40
  -3  10  -4   14.90    2.90
   3  10   4   20.10    5.30
  -3  10  -4   16.80    1.60
   3  10   4   20.30    5.10
  -4  10  -4  184.38    6.30
   4  10   4  222.38    9.60
   4 -11  -4   83.19    4.40
   4 -11  -4   79.79    4.00
   4  11  -4   84.09    3.90
   4  11  -4   91.39    4.10
   3 -11  -4  188.18    7.70
   3 -11  -4  177.48    8.80
   3 -11  -4  176.28    9.70
   3 -11  -4  187.38    7.40
  -3  11   4  152.58    8.10
   3  11  -4  190.88    7.70
   3  11  -4  189.78    7.40
   2 -11  -4  128.09    7.40
   2 -11  -4  129.29    7.00
   2 -11  -4  134.99    6.00
  -2 -11   4  127.69    6.60
   2  11  -4  128.89    6.50
  -2  11   4  136.89    7.90
   2  11  -4  132.89    6.20
  -1 -11   4  238.78   10.80
   1 -11  -4  234.08   10.10
   1 -11  -4  246.08    9.20
  -1 -11   4  239.78   10.70
   1 -11  -4  229.88   10.60
  -1 -11   4  235.48   10.00
   1  11  -4  237.88    9.20
  -1  11   4  239.88   11.80
   1  11  -4  242.08   10.10
   0 -11  -4   51.39    3.80
   0 -11   4   51.39    4.70
   0 -11   4   59.59    4.90
   0  11  -4   54.09    3.40
   0  11   4   51.69    5.20
   0  11  -4   58.49    4.20
   1 -11   4  396.36   16.50
  -1 -11  -4  387.46   13.90
   1 -11   4  408.46   15.70
   1 -11   4  405.96   14.50
   1 -11   4  388.66   16.10
  -1  11  -4  399.56   14.80
  -1  11  -4  376.46   12.90
   1  11   4  421.96   16.50
   2 -11   4  172.48    8.50
   2 -11   4  124.69    9.60
   2 -11   4  171.28    7.60
   2 -11   4  148.49    7.10
   2  11   4  164.58    8.10
  -2  11  -4  138.59    6.80
   3 -11   4   74.59    4.00
   3 -11   4   63.39    4.10
   3 -11   4   75.09    4.10
  -3  11  -4   73.89    3.80
   3 -12  -4  100.69    4.50
   3  12  -4   88.99    4.00
   2 -12  -4   18.50    2.70
   2 -12  -4   24.80    2.70
   2  12  -4   27.10    2.20
   2  12  -4   25.60    2.30
  -2  12   4   29.70    4.20
   1 -12  -4   93.39    4.20
  -1 -12   4   80.69    4.40
   1 -12  -4   86.79    4.80
   1  12  -4   80.79    4.10
   1  12  -4   82.79    4.50
  -1  12   4   88.09    6.20
   0 -12  -4  359.86   13.50
   0 -12   4  387.56   14.30
   0  12   4  368.16   14.90
   0  12  -4  409.86   13.60
   1 -12   4  457.45   15.40
   1  12   4  445.56   16.40
   2 -12   4   33.60    2.90
   2 -12   4   39.70    2.80
  -2  12  -4   40.70    2.50
  -1  13   4  193.08    7.90
   1  13  -4  184.68    7.00
   0  13   4  447.26   14.90
   0  13  -4  434.16   14.10
   8   0  -5    7.20    1.70
   7   0  -5   63.99    4.30
  -7   0   5   73.59    3.70
   7   0  -5   72.79    5.50
   7   0  -5   64.99    5.50
  -7   0   5   72.39    4.20
  -7   0   5   67.29    4.10
   7   0  -5   71.19    4.40
  -6   0   5   52.29    4.20
   6   0  -5   53.09    4.40
  -6   0   5   53.79    3.80
   6   0  -5   60.49    5.90
  -6   0   5   51.59    4.60
   6   0  -5   56.79    4.50
  -6   0   5   53.79    5.40
  -6   0   5   56.39    4.50
  -5   0   5   74.29    5.30
  -5   0   5   81.49    8.60
  -5   0   5   78.89    4.70
  -5   0   5   83.69    5.60
  -5   0   5   56.69   10.30
  -5   0   5   74.09    5.60
   5   0  -5   75.89    8.40
  -4   0   5  131.19    9.00
  -4   0   5  141.09    7.20
  -4   0   5  136.89    6.40
   4   0  -5  130.99    7.10
  -4   0   5  146.59   12.20
  -4   0   5  125.49   21.20
  -4   0   5  153.18    7.90
  -3   0   5 7041.00  238.48
  -3   0   5 7086.39  207.78
  -3   0   5 7259.37  204.98
  -3   0   5 7033.90  204.28
  -2   0   5 1192.88   48.00
   2   0  -5 1462.65   43.90
   1   0  -5 2381.16   70.29
  -1   0   5 2398.76   71.19
   1   0  -5 2493.25   74.79
   1   0  -5 2336.27   70.89
   0   0  -5 1211.78   36.50
   0   0  -5 1172.78   37.30
   0   0  -5 1241.08   41.70
  -1   0  -5   75.79    4.00
  -1   0  -5   78.39    4.30
  -1   0  -5   66.89    6.50
  -1   0  -5   86.39    5.00
  -2   0  -5  148.49   12.20
  -2   0  -5  162.18    7.20
  -2   0  -5  154.38   10.80
  -2   0  -5  166.78    8.30
  -3   0  -5  842.62   29.00
  -3   0  -5  827.12   35.20
  -3   0  -5  851.71   27.10
  -3   0  -5  807.32   25.80
  -3   0  -5  845.02   27.60
  -4   0  -5  110.39    7.50
  -4   0  -5  113.29    6.40
  -4   0  -5  122.09    6.90
   4   0   5  114.29    6.80
   4   0   5  125.29    9.40
  -4   0  -5  124.79    5.70
   4   0   5  133.19    7.80
  -4   0  -5  114.69   11.60
   5   0   5  256.87   11.00
  -5   0  -5  265.87   11.60
   5   0   5  269.37   16.40
  -5   0  -5  294.67   11.40
  -6   0  -5   68.69    3.20
  -6   0  -5   68.79    5.30
   6   0   5   69.79    7.30
   6   0   5   59.99    4.90
   8  -1  -5   47.10    4.20
   8   1  -5   41.40    2.90
   8   1  -5   49.80    3.60
  -7  -1   5   38.80    3.60
  -7  -1   5   46.50    3.00
   7  -1  -5   41.90    4.30
   7  -1  -5   47.50    4.10
   7  -1  -5   49.70    4.50
  -7  -1   5   49.70    3.40
  -7  -1   5   48.00    3.50
   7  -1  -5   46.40    3.50
   7   1  -5   42.30    3.30
  -7   1   5   45.30    3.30
  -7   1   5   45.20    3.00
   7   1  -5   45.30    4.60
  -7   1   5   50.89    3.20
  -7   1   5   63.69    9.80
   7   1  -5   47.10    3.70
   7   1  -5   47.20    4.80
   6  -1  -5  181.78   10.20
   6  -1  -5  190.08    9.00
  -6  -1   5  195.88    9.00
  -6  -1   5  187.08    9.80
  -6  -1   5  196.88    9.40
  -6  -1   5  198.38    8.10
  -6   1   5  195.28    8.90
   6   1  -5  198.38    9.30
  -6   1   5  178.48    9.60
   6   1  -5  168.18   13.30
   6   1  -5  200.18   11.30
  -6   1   5  193.58    9.00
  -6   1   5  184.58    9.40
  -6   1   5  185.88   10.90
   6   1  -5  187.78    9.80
  -6   1   5  194.38    7.70
   6   1  -5  183.58    8.00
  -5  -1   5   33.10    3.70
  -5  -1   5   30.40    3.50
  -5  -1   5   19.30    5.60
  -5  -1   5   29.20    3.20
   5  -1  -5   28.90    3.30
  -5  -1   5   32.90    3.70
  -5  -1   5   35.20    4.50
  -5   1   5   30.30    3.20
   5   1  -5   33.30    3.20
  -5   1   5   29.60    3.60
   5   1  -5   32.70    5.80
  -5   1   5   28.00    4.90
   5   1  -5   33.40    4.10
  -5   1   5   28.70    7.70
  -5   1   5   41.40    6.60
  -5   1   5   33.90    4.70
  -4  -1   5  939.71   61.19
  -4  -1   5 1081.49   42.20
  -4  -1   5  875.01   30.40
  -4  -1   5  881.31   29.40
   4  -1  -5  939.01   33.50
  -4  -1   5  925.01   30.90
  -4  -1   5  937.01   31.40
   4  -1  -5  889.41   29.30
  -4   1   5  937.91   33.90
   4   1  -5  985.40   38.30
  -4   1   5  910.11   39.50
   4   1  -5  968.30   30.10
  -4   1   5  948.71   61.39
  -4   1   5  940.61   31.20
   4   1  -5  930.51   34.70
   3  -1  -5  711.33   24.00
  -3  -1   5  745.53   24.40
   3  -1  -5  762.42   36.60
  -3  -1   5  752.82   46.70
  -3  -1   5  719.03   24.70
  -3  -1   5  721.93   27.00
  -3   1   5  729.33   27.10
  -3   1   5  726.13   48.00
  -3   1   5  738.33   24.00
  -3   1   5  704.23   24.50
   2  -1  -5 4582.54  138.39
  -2  -1   5 4650.33  132.89
   2  -1  -5 4469.45  131.89
  -2   1   5 4253.57  134.99
   2   1  -5 4556.24  139.79
  -2   1   5 4619.14  132.39
   2   1  -5 4658.73  137.19
  -2   1   5 4746.23  157.28
  -1  -1   5 2933.01   86.39
   1  -1  -5 2993.40   90.39
   1  -1  -5 2858.31   85.09
  -1   1   5 2969.90  101.69
   1   1  -5 2914.41   86.89
   1   1  -5 2895.81   88.59
   0  -1   5 2901.81   85.29
   0  -1  -5 2924.31   83.89
   0  -1  -5 2821.32   89.39
   0   1  -5 2914.11   91.09
   0   1  -5 2770.52   83.69
   0   1   5 2958.60   93.39
   0   1  -5 2908.01   84.99
  -1  -1  -5 1241.58   38.60
  -1  -1  -5 1195.78   43.90
  -1  -1  -5 1271.27   38.90
  -1  -1  -5 1302.67   40.10
  -1   1  -5 1418.36   39.50
  -1   1  -5 1278.67   44.80
  -1   1  -5 1275.17   40.10
  -1   1  -5 1276.27   38.90
  -2  -1  -5  671.53   21.90
  -2  -1  -5  702.03   28.10
  -2  -1  -5  639.04   22.90
  -2  -1  -5  605.44   29.90
  -2  -1  -5  688.33   21.60
  -2   1  -5  655.03   21.90
  -2   1  -5  659.63   21.50
  -2   1  -5  702.13   23.50
  -2   1  -5  638.94   27.80
  -3  -1  -5   31.40    3.00
  -3  -1  -5   29.20    4.30
  -3  -1  -5   39.50    7.30
   3  -1   5   26.20    3.40
  -3  -1  -5   31.80    3.00
  -3   1  -5   30.00    2.40
  -3   1  -5   42.00    7.60
   3   1   5   36.40    5.40
  -3   1  -5   33.80    3.20
  -3   1  -5   32.30    3.00
  -3   1  -5   30.20    3.60
   3   1   5   29.50    3.50
  -4  -1  -5  466.65   16.90
  -4  -1  -5  464.05   17.50
  -4  -1  -5  465.25   15.50
  -4  -1  -5  468.25   24.50
  -4   1  -5  454.85   25.70
  -4   1  -5  449.56   18.60
  -4   1  -5  464.25   17.30
  -4   1  -5  425.66   17.30
   4   1   5  453.35   18.50
  -4   1  -5  460.15   15.40
  -4   1  -5  477.25   16.80
  -5  -1  -5   53.69    4.30
  -5  -1  -5   53.29    4.10
  -5  -1  -5   52.89    3.30
   5  -1   5   52.49    4.90
   5   1   5   52.29    5.00
   5   1   5   52.69    4.30
  -5   1  -5   45.60    4.10
  -5   1  -5   53.29    3.40
  -5   1  -5   50.39    3.80
   5   1   5   55.79    7.80
   5   1   5   50.89    5.40
  -5   1  -5   45.80    4.60
   5   1   5   47.40    4.10
  -6  -1  -5  102.59    4.20
   6  -1   5  107.99    6.10
  -6  -1  -5   96.39    4.90
  -6  -1  -5   92.49    5.20
   6  -1   5   92.19    8.30
   6   1   5   94.29    5.80
  -6   1  -5  101.19    3.90
  -6   1  -5   89.19    4.40
   6   1   5  105.29    8.80
  -7  -2   5    9.50    1.90
   7  -2  -5   11.40    3.00
  -7  -2   5   11.30    1.80
  -7  -2   5    8.60    1.90
   7  -2  -5    9.90    1.90
   7  -2  -5   11.20    2.40
  -7  -2   5    9.00    1.60
   7   2  -5   10.00    2.40
   7   2  -5   12.40    3.00
  -7   2   5   10.00    1.00
   7   2  -5    8.20    1.90
  -7   2   5   11.20    2.50
   7   2  -5    9.70    3.00
  -7   2   5    9.70    1.70
  -6  -2   5   25.00    3.20
  -6  -2   5   29.50    3.00
   6  -2  -5   26.40    2.80
   6  -2  -5   28.90    3.40
  -6  -2   5   30.10    3.60
   6   2  -5   28.00    2.90
  -6   2   5   26.30    3.60
  -6   2   5   26.70    3.60
   6   2  -5   31.40    3.30
   6   2  -5   32.30    6.70
   6   2  -5   39.00    5.90
  -6   2   5   30.40    5.00
  -6   2   5   31.80    3.40
  -6   2   5   32.50    3.00
   6   2  -5   24.10    4.10
   6   2  -5   30.30    5.00
  -5  -2   5 1278.07   80.69
  -5  -2   5 1278.37   41.40
  -5  -2   5 1231.28   40.30
  -5  -2   5 1266.37   50.79
  -5   2   5 1260.27   39.40
  -5   2   5 1228.38   40.40
   5   2  -5 1224.18   39.80
  -5   2   5 1269.47   38.10
  -5   2   5 1234.08   43.90
   5   2  -5 1248.18   60.89
  -5   2   5 1204.08   52.09
  -5   2   5 1238.08   42.10
   5   2  -5 1265.67   39.60
  -5   2   5 1274.87   39.90
   5   2  -5 1325.07   43.40
  -4  -2   5  337.57   13.10
  -4  -2   5  370.56   35.80
   4  -2  -5  360.46   13.30
   4  -2  -5  334.57   12.30
  -4  -2   5  341.57   13.90
  -4  -2   5  392.26   14.70
  -4  -2   5  371.56   15.00
   4  -2  -5  396.06   15.00
  -4   2   5  387.96   15.20
   4   2  -5  355.06   13.60
   4   2  -5  383.26   19.30
   4   2  -5  353.26   13.30
  -4   2   5  349.67   13.80
  -4   2   5  334.67   15.10
  -4   2   5  350.56   12.50
  -4   2   5  378.86   14.40
  -4   2   5  364.16   16.80
  -4   2   5  356.86   21.50
  -3  -2   5  111.79    6.30
   3  -2  -5  122.99    6.10
   3  -2  -5  113.49    6.20
   3  -2  -5  115.49   13.10
  -3  -2   5  110.59    6.50
  -3   2   5  129.09    8.80
  -3   2   5  118.19   10.10
  -3   2   5  109.39    6.10
  -3   2   5  110.89    5.70
   2  -2  -5 3002.90   89.79
   2  -2  -5 3084.79   89.49
   2  -2  -5 2791.32   96.19
  -2  -2   5 3098.19   90.89
  -2  -2   5 3080.19   90.49
  -2   2   5 3034.20   92.89
  -2   2   5 3134.79  115.49
  -2   2   5 3180.68  104.69
  -2   2   5 2977.00   89.69
   2   2  -5 3317.07  102.49
   1  -2  -5 6682.53  193.78
  -1  -2   5 6448.65  188.78
   1  -2  -5 6415.86  187.48
  -1   2   5 6710.63  206.08
  -1   2   5 6486.25  190.58
   1   2  -5 6552.84  187.98
   0  -2   5  660.13   22.60
   0  -2  -5  680.63   21.20
   0   2  -5  648.24   21.90
   1  -2   5 4455.75  130.89
  -1  -2  -5 4358.56  128.69
  -1  -2  -5 4300.67  134.69
   1  -2   5 4535.85  130.59
  -1   2  -5 4473.85  128.99
  -1   2  -5 4434.36  135.99
  -1   2  -5 4753.62  130.69
  -2  -2  -5 1066.99   32.90
   2  -2   5 1052.69   34.50
  -2  -2  -5 1032.80   32.50
  -2  -2  -5 1019.50   38.90
  -2   2  -5 1082.79   40.60
  -2   2  -5 1071.89   34.50
  -2   2  -5 1036.50   32.90
  -2   2  -5 1045.90   32.40
  -3  -2  -5   41.00    3.10
   3  -2   5   42.70    4.10
  -3  -2  -5   43.30    5.90
  -3  -2  -5   40.90    3.50
  -3  -2  -5   44.00    3.60
  -3   2  -5   42.60    4.20
  -3   2  -5   46.70    3.60
  -3   2  -5   41.80    8.00
  -3   2  -5   38.50    2.70
   3   2   5   41.90    5.60
   3   2   5   45.50    4.30
   3   2   5   37.50    3.70
  -3   2  -5   44.30    3.60
  -4  -2  -5   29.60    2.70
   4  -2   5   30.20    3.80
  -4  -2  -5   28.20    3.20
  -4  -2  -5   42.80   10.60
   4   2   5   33.20    7.70
   4   2   5   34.40    4.50
  -4   2  -5   25.00    3.00
  -4   2  -5   26.80    3.90
  -4   2  -5   38.20    8.70
  -4   2  -5   38.40    5.90
   4   2   5   24.90    4.10
  -4   2  -5   30.70    3.70
   4   2   5   33.00    6.10
  -4   2  -5   29.10    2.50
   5  -2   5   76.99    5.70
  -5  -2  -5   82.89    5.00
  -5  -2  -5   75.79    5.00
  -5  -2  -5   73.39    4.00
  -5   2  -5   65.59    4.70
  -5   2  -5   71.49    6.30
   5   2   5   67.49    5.20
   5   2   5   75.39    9.00
   5   2   5   76.29    6.00
   5   2   5   69.89    4.90
  -5   2  -5   72.79    3.70
   5   2   5   70.29    6.60
  -5   2  -5   71.79    5.00
   5   2   5   70.79    5.60
  -5   2  -5   74.39    5.80
   6  -2   5   62.39    4.40
  -6  -2  -5   58.09    2.90
   6   2   5   65.89    4.60
   6   2   5   56.99    6.30
  -6   2  -5   57.69    2.60
   6   2   5   56.29    4.30
  -7  -3   5   16.20    1.90
   7  -3  -5   16.70    2.80
   7  -3  -5   15.30    2.30
   7  -3  -5   16.60    2.90
  -7  -3   5   16.00    1.70
  -7  -3   5   11.40    2.40
  -7  -3   5   14.00    2.20
   7   3  -5   12.00    2.90
   7   3  -5   16.30    2.50
  -7   3   5   18.50    3.40
   7   3  -5   13.30    2.80
   7   3  -5   16.80    2.50
  -7   3   5   19.20    2.70
   6  -3  -5   26.50    2.70
  -6  -3   5   18.50    3.10
  -6  -3   5   24.50    2.90
  -6  -3   5   26.90    3.10
  -6  -3   5   21.30    2.50
   6   3  -5   26.50    3.60
  -6   3   5   25.30    1.90
   6   3  -5   21.20    5.30
   6   3  -5   25.40    3.80
  -6   3   5   28.90    3.60
   6   3  -5   22.70    2.70
   6   3  -5   20.80    4.30
  -6   3   5   28.70    3.10
  -6   3   5   30.50    5.20
  -5  -3   5 1091.39   77.09
  -5  -3   5 1230.68   40.70
  -5  -3   5 1341.17   42.70
   5  -3  -5 1337.27   40.60
  -5  -3   5 1434.46   63.19
  -5  -3   5 1292.47   40.30
   5   3  -5 1267.17   41.20
  -5   3   5 1324.77   41.00
   5   3  -5 1321.37   41.10
   5   3  -5 1333.37   41.60
  -5   3   5 1282.57   38.80
  -5   3   5 1326.57   40.00
   5   3  -5 1270.67   40.80
  -5   3   5 1199.98   44.70
  -5   3   5 1283.67   43.10
   5   3  -5 1366.26   45.00
   5   3  -5 1368.36   50.29
   4  -3  -5  121.09    5.60
   4  -3  -5  124.89    7.30
  -4  -3   5  120.99    7.10
  -4  -3   5  107.49   19.40
  -4  -3   5  124.79    7.00
   4  -3  -5  110.89    5.90
   4  -3  -5  110.79    7.00
   4   3  -5  132.19   10.30
  -4   3   5  133.99   12.60
   4   3  -5  115.89    6.00
  -4   3   5  126.59    8.70
  -4   3   5  120.59    6.40
  -4   3   5  103.09    7.20
  -4   3   5  122.49    7.70
  -4   3   5  114.99    6.00
  -4   3   5  119.99    5.20
   4   3  -5  130.49    8.30
   4   3  -5  120.09    6.20
   4   3  -5  123.59    6.50
   3  -3  -5  665.53   23.20
   3  -3  -5  701.13   23.80
  -3  -3   5  697.53   24.20
   3  -3  -5  662.13   38.00
  -3  -3   5  677.33   23.60
  -3   3   5  697.43   26.20
  -3   3   5  750.72   25.70
  -3   3   5  679.33   30.60
   3   3  -5  718.53   38.40
   2  -3  -5  257.27   15.10
   2  -3  -5  252.77    9.80
  -2  -3   5  258.57   10.90
  -2  -3   5  244.38   10.40
   2  -3  -5  259.77   10.20
  -2   3   5  237.38   19.40
   2   3  -5  233.08   18.20
  -2   3   5  243.98   11.90
  -2   3   5  233.58   14.20
   1  -3  -5 2053.59   66.49
  -1  -3   5 1928.91   60.89
   1  -3  -5 2022.40   59.89
  -1  -3   5 2011.10   61.29
   1  -3  -5 2000.70   59.59
  -1   3   5 2036.00   62.69
  -1   3   5 1990.60   79.19
   1   3  -5 2104.39   60.29
   0  -3   5 1081.49   35.20
   0  -3  -5 1100.79   33.40
   0  -3   5 1072.39   35.10
   0   3  -5 1091.69   34.30
   0   3  -5 1118.39   33.90
   1  -3   5 2745.03   79.79
  -1  -3  -5 2663.73   77.19
   1  -3   5 2657.53   79.29
  -1  -3  -5 2498.65   76.79
  -1  -3  -5 2655.93   83.19
  -1   3  -5 2608.34   84.39
  -1   3  -5 2628.94   78.69
   2  -3   5   29.80    4.40
   2  -3   5   30.80    3.50
  -2  -3  -5   30.80    2.80
  -2  -3  -5   36.40    5.00
   2  -3   5   31.20    3.90
  -2  -3  -5   31.50    2.70
  -2   3  -5   23.30    2.90
  -2   3  -5   28.60    3.30
  -2   3  -5   31.40    5.50
   2   3   5   37.10    5.40
  -2   3  -5   22.50    2.40
  -3  -3  -5  424.06   15.60
  -3  -3  -5  440.56   15.60
  -3  -3  -5  409.16   14.20
  -3  -3  -5  431.06   21.70
   3  -3   5  429.66   16.80
   3  -3   5  418.56   15.00
  -3   3  -5  441.36   16.30
  -3   3  -5  384.96   23.10
  -3   3  -5  423.86   14.80
   3   3   5  429.46   17.30
  -3   3  -5  414.16   13.80
  -3   3  -5  416.96   15.50
   3   3   5  448.16   24.10
   3   3   5  413.06   16.20
   3   3   5  423.26   35.70
  -3   3  -5  438.16   17.50
   3   3   5  423.06   19.40
   4  -3   5   58.29    5.20
  -4  -3  -5   56.69    4.20
  -4  -3  -5   58.39    3.60
  -4  -3  -5   58.89    7.50
  -4  -3  -5   59.99    4.60
  -4   3  -5   62.49    4.80
   4   3   5   63.49    8.90
   4   3   5   61.79    5.50
   4   3   5   62.59    5.60
  -4   3  -5   63.79    5.60
  -4   3  -5   58.19    3.30
  -4   3  -5   62.89    5.10
   4   3   5   63.89    5.10
   4   3   5   68.69    7.50
   5  -3   5   45.10    3.70
  -5  -3  -5   48.90    3.10
  -5  -3  -5   49.70    3.80
  -5  -3  -5   52.29    4.00
  -5   3  -5   50.89    3.90
   5   3   5   47.90    5.50
  -5   3  -5   47.90    2.50
   5   3   5   40.20    6.60
   5   3   5   41.30    4.30
  -5   3  -5   49.60    4.70
   5   3   5   39.80    4.40
   6  -3   5   54.69    4.00
  -6  -3  -5   60.29    3.50
  -6  -3  -5   64.29    3.00
   6   3   5   62.19    4.80
  -6   3  -5   55.49    3.30
   6   3   5   53.89    4.20
   6   3   5   60.29    6.30
  -7  -4   5   96.19    4.90
  -7  -4   5  100.69    4.30
   7  -4  -5  103.79    5.60
   7  -4  -5   99.59    5.00
   7  -4  -5   96.99    5.40
  -7   4   5   92.49    5.80
  -7   4   5  109.29    5.40
   7   4  -5  101.79    6.30
   7   4  -5   98.39    5.80
   7   4  -5   96.49    6.90
   6  -4  -5  272.37   10.60
  -6  -4   5  261.27   11.70
  -6  -4   5  279.87   10.50
  -6  -4   5  256.57   10.00
   6   4  -5  284.07   12.00
   6   4  -5  232.28   16.30
  -6   4   5  251.67   13.00
  -6   4   5  260.57   11.90
  -6   4   5  275.87   10.50
   6   4  -5  248.88   10.70
   6   4  -5  265.37   14.00
   6   4  -5  269.77   10.90
   6   4  -5  262.87   12.60
  -5  -4   5   80.19    5.30
  -5  -4   5   91.29    5.90
  -5  -4   5   78.49    8.80
   5  -4  -5   81.29    5.10
  -5  -4   5   87.79    6.10
   5  -4  -5   82.09    5.30
  -5  -4   5   84.19    5.10
   5   4  -5   73.89    6.50
   5   4  -5   78.79    5.60
  -5   4   5   78.69    5.10
  -5   4   5   83.09    6.50
   5   4  -5   80.69    5.40
   5   4  -5   79.19    7.30
   5   4  -5   95.19   10.00
   5   4  -5   80.59    5.40
   5   4  -5   84.89    6.10
  -5   4   5   84.59    7.10
  -4  -4   5  307.47   12.50
   4  -4  -5  323.77   12.60
  -4  -4   5  332.77   13.70
   4  -4  -5  319.27   30.30
  -4  -4   5  297.07   12.90
   4  -4  -5  337.97   13.60
  -4  -4   5  356.56   36.10
   4  -4  -5  329.37   12.10
   4  -4  -5  334.37   14.20
  -4  -4   5  324.07   14.00
   4   4  -5  322.07   12.90
   4   4  -5  336.37   12.10
  -4   4   5  329.47   14.70
   4   4  -5  328.67   14.10
  -4   4   5  317.87   12.70
   4   4  -5  360.16   19.20
   4   4  -5  343.77   13.00
   4   4  -5  339.97   15.70
   3  -4  -5  429.66   14.60
   3  -4  -5  442.16   16.10
   3  -4  -5  427.16   16.50
   3  -4  -5  399.36   14.90
  -3  -4   5  426.46   16.30
   3  -4  -5  458.05   31.60
  -3  -4   5  437.86   16.70
   3   4  -5  431.46   15.80
   3   4  -5  409.86   17.60
   3   4  -5  420.06   28.90
  -3   4   5  457.15   18.60
  -3   4   5  451.55   16.20
   3   4  -5  429.36   15.20
   2  -4  -5  220.78    9.00
   2  -4  -5  215.48   14.20
  -2  -4   5  198.98    9.50
  -2  -4   5  201.48    9.80
   2  -4  -5  221.98    9.40
  -2   4   5  245.88   20.70
   2   4  -5  221.08   19.10
  -2   4   5  207.38   10.70
   1  -4  -5 2121.49   62.59
  -1  -4   5 2070.69   63.89
   1  -4  -5 2153.58   70.09
   1  -4  -5 2033.60   62.09
  -1   4   5 2155.38   85.79
   1   4  -5 2089.89   62.49
  -1   4   5 2101.39   64.69
   0  -4  -5 2228.98   67.69
   0  -4  -5 2309.87   68.09
   0  -4   5 2319.67   70.09
   0  -4   5 2378.86   70.59
   0   4  -5 2374.26   69.09
   0   4   5 2195.28   92.29
   0   4   5 2360.36   70.19
  -1  -4  -5  866.71   27.90
   1  -4   5  904.31   31.00
  -1  -4  -5  906.91   28.30
   1  -4   5  908.81   30.60
  -1   4  -5  915.51   29.80
   1   4   5  910.11   51.19
   1   4   5  892.51   29.60
   2  -4   5  155.48    8.80
  -2  -4  -5  153.48   10.60
  -2  -4  -5  153.88    6.90
  -2  -4  -5  156.98    6.80
  -2   4  -5  140.59    8.00
   2   4   5  152.78    9.90
   2   4   5  114.39   10.80
   2   4   5  162.68   13.30
   2   4   5  145.59    8.10
   2   4   5  146.89   20.20
   3  -4   5 1466.35   46.90
  -3  -4  -5 1428.06   45.00
  -3  -4  -5 1476.45   52.59
  -3  -4  -5 1495.25   44.80
   3  -4   5 1434.96   45.20
  -3  -4  -5 1385.46   43.40
   3  -4   5 1461.55   46.50
  -3   4  -5 1460.95   47.40
  -3   4  -5 1406.06   42.50
  -3   4  -5 1466.85   45.90
   3   4   5 1474.95   74.79
   3   4   5 1515.35   47.60
   3   4   5 1417.76   47.40
   3   4   5 1458.15   50.29
   3   4   5 1528.15   56.59
   4  -4   5  713.43   24.90
  -4  -4  -5  690.03   22.00
  -4  -4  -5  655.53   25.30
  -4  -4  -5  698.53   23.30
   4   4   5  657.53   27.80
   4   4   5  719.53   26.60
   4   4   5  688.03   25.70
  -4   4  -5  701.33   25.90
   4   4   5  699.23   25.30
   4   4   5  720.93   33.50
  -4   4  -5  720.13   24.30
  -4   4  -5  662.83   20.70
  -5  -4  -5  118.49    6.00
  -5  -4  -5  126.49    6.80
   5  -4   5  120.59    6.30
  -5  -4  -5  112.69    5.10
   5   4   5  124.39    8.80
   5   4   5  118.39   10.90
  -5   4  -5  117.39    7.40
  -5   4  -5  119.29    6.30
   5   4   5  116.39    7.20
   5   4   5  111.79    7.20
   6  -4   5   15.70    2.30
  -6  -4  -5   21.50    1.80
  -6  -4  -5   22.90    1.60
  -6   4  -5   16.20    1.70
   6   4   5   17.40    4.80
   6   4   5   19.50    3.00
   7  -5  -5   14.30    2.00
  -7  -5   5   13.70    1.60
   7  -5  -5   12.80    2.50
   7  -5  -5   16.90    2.30
   7   5  -5    8.20    2.00
   7   5  -5    7.70    2.00
  -7   5   5   15.40    1.90
   7   5  -5    9.40    2.00
   6  -5  -5   32.80    3.00
  -6  -5   5   25.60    2.80
  -6  -5   5   26.60    2.80
  -6  -5   5   32.20    2.60
   6   5  -5   22.90    4.40
   6   5  -5   27.80    2.90
  -6   5   5   31.10    3.50
   6   5  -5   32.00    4.20
   6   5  -5   24.60    5.70
  -6   5   5   28.90    3.70
   6   5  -5   22.90    3.50
  -5  -5   5  244.58   10.40
  -5  -5   5  258.87   11.40
   5  -5  -5  264.67   10.40
  -5  -5   5  260.27   10.40
  -5  -5   5  268.57   12.00
   5   5  -5  265.27   12.80
   5   5  -5  265.67   11.80
  -5   5   5  255.47   10.30
  -5   5   5  261.17   12.40
  -5   5   5  258.97   13.40
   5   5  -5  267.37   14.40
   5   5  -5  261.77   17.50
   5   5  -5  248.98   11.10
   5   5  -5  271.87   11.40
   4  -5  -5  129.79    7.60
   4  -5  -5  129.09    8.10
  -4  -5   5  129.09    7.00
  -4  -5   5  132.19    7.40
  -4  -5   5  128.29    7.70
   4  -5  -5  144.49   19.50
   4   5  -5  137.59    9.60
  -4   5   5  134.89    6.80
  -4   5   5  121.29    8.70
   4   5  -5  141.49   14.20
  -4   5   5  137.69   12.40
   4   5  -5  121.29    8.40
   4   5  -5  120.39    9.10
  -3  -5   5  966.10   31.80
   3  -5  -5  952.60   31.30
   3  -5  -5  915.41   29.90
   3  -5  -5  937.61   29.40
   3  -5  -5  958.00   54.29
  -3  -5   5  933.01   34.80
   3   5  -5  984.40   31.00
  -3   5   5  896.61   31.90
   3   5  -5  957.70   30.20
   3   5  -5  999.50   37.40
  -3   5   5  925.41   32.70
  -3   5   5  945.01   30.50
   3   5  -5  863.21   49.20
   3   5  -5 1007.90   29.80
  -3   5   5  889.81   33.10
   2  -5  -5  419.46   15.70
  -2  -5   5  416.06   16.10
   2  -5  -5  387.96   21.40
  -2  -5   5  395.76   15.90
   2  -5  -5  407.56   14.90
   2   5  -5  411.66   29.50
  -2   5   5  430.06   17.00
   2   5  -5  391.76   14.90
   1  -5  -5  596.44   19.80
   1  -5  -5  609.84   26.90
  -1  -5   5  596.74   21.60
  -1  -5   5  585.44   21.40
   1  -5  -5  591.64   20.20
  -1   5   5  627.24   21.70
   1   5  -5  554.04   21.60
  -1   5   5  607.74   38.90
   0  -5   5  435.96   17.30
   0  -5  -5  418.56   15.00
   0  -5   5  456.85   17.70
   0  -5  -5  435.36   15.40
   0   5  -5  439.76   16.00
   0   5   5  446.36   16.10
   0   5   5  478.35   25.90
   0   5   5  469.95   34.60
   1  -5   5  240.88   11.90
   1  -5   5  244.18   11.20
  -1  -5  -5  240.58    9.40
  -1  -5  -5  248.98    9.70
   1  -5   5  245.68   12.00
   1  -5   5  234.18   10.80
   1   5   5  250.97   15.90
  -1   5  -5  274.47   13.00
   1   5   5  263.07   26.90
   1   5   5  252.47   12.40
   1   5   5  246.18   11.80
   1   5   5  242.98   11.90
  -1   5  -5  241.88   10.00
   1   5   5  238.88   13.30
  -1   5  -5  252.67   10.90
  -2  -5  -5 1530.55   46.80
   2  -5   5 1501.35   47.80
  -2  -5  -5 1636.64   53.59
  -2  -5  -5 1501.45   46.10
   2  -5   5 1495.25   50.59
   2  -5   5 1555.24   49.70
   2  -5   5 1550.54   48.70
   2   5   5 1477.75   49.99
  -2   5  -5 1463.65   47.10
   2   5   5 1521.85   49.60
   2   5   5 1530.75   48.90
   2   5   5 1489.35   51.89
   2   5   5 1538.65   57.79
   2   5   5 1533.35   50.09
   2   5   5 1542.25   78.29
  -2   5  -5 1576.54   48.90
   3  -5   5  654.73   25.30
  -3  -5  -5  680.33   28.70
  -3  -5  -5  656.93   22.60
   3  -5   5  681.03   24.80
   3  -5   5  666.43   24.50
  -3  -5  -5  657.83   22.20
   3  -5   5  640.34   23.20
   3   5   5  715.83   33.50
  -3   5  -5  649.74   24.80
   3   5   5  652.13   48.00
   3   5   5  688.33   25.20
   3   5   5  687.03   28.10
   3   5   5  670.23   26.10
   3   5   5  701.83   25.60
  -4  -5  -5   66.69    3.90
   4  -5   5   69.39    5.60
  -4  -5  -5   65.49    4.40
  -4  -5  -5   65.89    4.40
   4  -5   5   54.49    4.10
   4   5   5   60.19    7.80
   4   5   5   63.19    8.80
   4   5   5   64.99    5.70
   4   5   5   71.09    6.10
   4   5   5   64.39    6.40
  -4   5  -5   63.49    4.80
   5  -5   5  157.78    8.80
  -5  -5  -5  171.88    7.30
  -5  -5  -5  178.08    6.80
  -5  -5  -5  163.28    7.50
   5   5   5  177.38    8.80
  -5   5  -5  169.28    9.40
   5   5   5  157.08    8.60
  -5   5  -5  174.78    7.80
   5   5   5  166.68   12.20
   5   5   5  188.18   10.60
  -6  -5  -5   15.60    2.30
  -6  -5  -5   15.60    1.10
   6  -5   5   14.80    1.80
   6   5   5   11.70    2.30
   6   5   5   15.90    3.20
  -6   5  -5   16.50    1.50
   7  -6  -5   87.89    3.90
  -7   6   5  100.19    4.30
   7   6  -5   87.69    5.40
   7   6  -5   95.99    4.80
  -6  -6   5   64.29    4.10
  -6  -6   5   61.89    3.40
   6  -6  -5   67.49    4.30
  -6  -6   5   55.09    4.10
   6   6  -5   67.19    4.20
  -6   6   5   60.49    4.60
   6   6  -5   66.99    5.50
   6   6  -5   57.29    7.30
   6   6  -5   60.89    6.10
  -6   6   5   63.79    4.90
   6   6  -5   54.49    4.90
   5  -6  -5   43.70    4.10
  -5  -6   5   36.10    3.50
  -5  -6   5   43.10    3.20
   5  -6  -5   42.10    4.30
  -5  -6   5   40.40    3.80
   5   6  -5   37.70    3.60
  -5   6   5   35.40    4.30
  -5   6   5   36.20    4.10
   5   6  -5   37.90    5.40
   5   6  -5   41.30    4.40
   5   6  -5   41.70    6.80
   5   6  -5   41.00    5.20
   5   6  -5   35.40    3.50
  -4  -6   5  476.65   17.80
   4  -6  -5  487.15   17.20
   4  -6  -5  460.05   16.40
  -4  -6   5  462.45   18.30
   4  -6  -5  468.25   18.10
   4  -6  -5  448.66   18.80
   4   6  -5  462.95   17.30
  -4   6   5  435.16   15.70
   4   6  -5  470.15   24.60
   4   6  -5  464.95   17.60
  -4   6   5  469.45   18.60
   4   6  -5  481.45   17.40
   4   6  -5  463.65   20.70
  -4   6   5  459.75   19.40
   3  -6  -5  779.72   27.70
  -3  -6   5  773.72   27.40
   3  -6  -5  807.52   27.30
  -3  -6   5  781.32   27.10
   3  -6  -5  747.53   47.80
   3  -6  -5  785.82   25.20
   3  -6  -5  808.62   25.80
  -3   6   5  787.92   28.50
   3   6  -5  810.32   26.10
   3   6  -5  777.12   26.50
   3   6  -5  772.32   32.90
   3   6  -5  819.52   29.80
   3   6  -5  765.42   47.60
  -3   6   5  772.12   27.50
  -3   6   5  756.72   28.30
   3   6  -5  780.02   26.20
   2  -6  -5   46.30    3.90
   2  -6  -5   48.30    4.20
   2  -6  -5   43.50    3.20
   2  -6  -5   25.40    8.40
  -2  -6   5   53.99    5.90
  -2  -6   5   49.99    4.60
   2  -6  -5   43.80    3.40
   2   6  -5   49.90   14.90
  -2   6   5   47.60    4.20
  -2   6   5   50.79    5.20
   2   6  -5   52.39    4.10
  -2   6   5   50.59    4.50
   2   6  -5   50.39    3.00
   2   6  -5   49.60    4.40
   1  -6  -5 1144.19   36.80
   1  -6  -5 1134.69   36.60
   1  -6  -5 1151.68   45.00
  -1  -6   5 1131.39   37.90
  -1  -6   5 1117.99   38.20
  -1   6   5 1222.58   44.80
  -1   6   5 1178.58   39.90
  -1   6   5 1162.58   38.20
   1   6  -5 1093.99   35.00
  -1   6   5 1197.48   37.00
   1   6  -5 1184.88   41.70
   0  -6   5    8.30    2.70
   0  -6  -5   15.20    2.50
   0  -6  -5   13.00    2.20
   0  -6   5   14.90    3.30
   0  -6   5   13.60    3.00
   0  -6  -5   13.80    4.80
   0  -6   5   21.00    3.50
   0   6   5   11.70    3.30
   0   6   5    9.10    4.50
   0   6   5   22.20    3.80
   0   6  -5   20.30    2.90
   0   6   5   13.10    2.90
   0   6   5   29.60    7.80
   0   6   5   29.40   11.10
   0   6   5   18.80    3.30
   0   6   5   18.90    5.20
   0   6  -5   17.30    4.60
  -1  -6  -5  161.58    7.90
   1  -6   5  166.38    8.70
   1  -6   5  176.88   10.00
   1  -6   5  178.98   10.00
   1  -6   5  163.18    8.90
  -1  -6  -5  176.88    8.70
   1   6   5  170.58    9.60
   1   6   5  170.98    8.90
   1   6   5  174.78   11.20
  -1   6  -5  158.78    7.60
  -1   6  -5  177.38    8.60
   1   6   5  167.38   10.10
   1   6   5  174.08   13.40
   1   6   5  188.98   21.60
   1   6   5  169.28    9.60
  -1   6  -5  162.78    8.20
   2  -6   5  270.67   12.90
   2  -6   5  232.28   12.70
  -2  -6  -5  251.37    9.80
   2  -6   5  242.18   11.40
  -2  -6  -5  259.07   10.10
   2  -6   5  241.18   11.90
  -2   6  -5  253.97   11.70
  -2   6  -5  244.78   10.60
   2   6   5  247.98   12.00
   2   6   5  248.18   17.40
   2   6   5  251.47   12.90
   2   6   5  247.78   12.60
   2   6   5  253.07   14.70
   2   6   5  242.68   27.60
   2   6   5  255.67   12.70
   3  -6   5 1710.93   52.59
   3  -6   5 1624.24   54.69
   3  -6   5 1676.33   53.99
  -3  -6  -5 1679.93   50.99
  -3  -6  -5 1733.63   51.49
   3  -6   5 1743.63   53.99
   3   6   5 1639.94   54.29
   3   6   5 1702.33   63.39
   3   6   5 1721.33   54.39
  -3   6  -5 1685.73   52.19
  -3   6  -5 1642.84   53.89
   3   6   5 1708.23   57.69
   3   6   5 1674.53   55.49
  -4  -6  -5   64.79    4.10
  -4  -6  -5   58.19    4.70
  -4  -6  -5   58.99    3.40
   4  -6   5   58.89    3.70
   4  -6   5   64.49    5.20
   4   6   5   65.89    6.90
  -4   6  -5   56.79    4.40
   4   6   5   54.29    5.30
  -4   6  -5   53.09    4.90
   4   6   5   52.99    4.60
   4   6   5   63.99    8.40
   4   6   5   64.89    5.40
   5  -6   5   36.40    3.20
  -5  -6  -5   35.60    2.70
  -5  -6  -5   36.70    2.20
   5   6   5   36.30    3.60
   5   6   5   33.90    5.10
  -5   6  -5   27.10    3.00
   5   6   5   36.70    4.70
  -5   6  -5   32.70    2.60
  -5   6  -5   36.40    2.90
   6  -6   5    7.40    1.50
  -6  -7   5   35.20    2.60
   6  -7  -5   36.30    3.10
  -6  -7   5   38.50    2.30
   6   7  -5   32.70    4.10
   6   7  -5   35.40    6.00
  -6   7   5   38.40    3.20
   6   7  -5   40.00    4.00
   6   7  -5   41.50    3.00
  -6   7   5   38.30    3.50
  -5  -7   5   53.99    4.00
   5  -7  -5   59.09    4.30
  -5  -7   5   68.19    4.70
   5  -7  -5   60.39    4.80
   5  -7  -5   54.69    4.80
   5   7  -5   73.79    5.40
  -5   7   5   58.79    4.80
  -5   7   5   59.89    4.90
   5   7  -5   57.89    4.30
   5   7  -5   60.39    6.20
   5   7  -5   58.29    4.30
   5   7  -5   57.39    7.70
   4  -7  -5  665.83   24.30
  -4  -7   5  665.13   23.50
  -4  -7   5  691.03   24.20
   4  -7  -5  677.73   25.30
   4  -7  -5  681.83   23.00
   4  -7  -5  679.63   22.50
  -4   7   5  698.03   24.30
  -4   7   5  668.93   25.00
   4   7  -5  671.03   31.30
   4   7  -5  671.73   23.40
   4   7  -5  635.44   23.50
   4   7  -5  659.73   23.30
   4   7  -5  685.23   27.20
  -3  -7   5  353.36   14.90
   3  -7  -5  348.97   15.40
  -3  -7   5  353.46   14.60
   3  -7  -5  342.17   13.40
   3  -7  -5  347.97   13.00
   3  -7  -5  370.86   33.00
   3   7  -5  366.76   32.30
  -3   7   5  349.57   14.60
  -3   7   5  368.46   16.20
  -3   7   5  363.36   15.10
   3   7  -5  339.47   16.70
   3   7  -5  362.36   14.40
   3   7  -5  359.06   20.00
   3   7  -5  333.27   13.90
   3   7  -5  376.16   14.00
   2  -7  -5  692.23   44.10
  -2  -7   5  686.83   24.90
   2  -7  -5  673.43   22.60
   2  -7  -5  675.83   22.10
  -2  -7   5  669.23   24.50
   2  -7  -5  716.83   24.10
  -2   7   5  691.03   26.40
   2   7  -5  676.13   23.80
  -2   7   5  698.13   23.90
  -2   7   5  684.03   23.90
  -2   7   5  697.83   24.70
   2   7  -5  643.84   44.60
   2   7  -5  708.93   29.70
  -1  -7   5   23.00    3.80
   1  -7  -5   26.70    2.40
  -1  -7   5   26.90    3.80
   1  -7  -5   29.50    3.00
   1  -7  -5   26.90    6.60
   1  -7  -5   30.30    2.80
  -1  -7   5   32.20    4.10
  -1  -7   5   21.30    3.60
   1  -7  -5   30.60    3.10
  -1   7   5   26.30    6.70
   1   7  -5   23.60    2.10
  -1   7   5   30.30    2.40
  -1   7   5   26.50    4.20
  -1   7   5   25.70    2.90
   1   7  -5   22.40    3.00
  -1   7   5   26.00    3.60
  -1   7   5   36.90   12.40
   0  -7  -5  989.70   40.90
   0  -7   5 1015.30   34.10
   0  -7  -5  955.60   31.00
   0  -7   5  940.41   34.00
   0  -7   5  943.61   32.30
   0  -7   5  966.40   32.60
   0  -7  -5  946.11   31.30
   0   7   5  986.20   33.70
   0   7  -5  992.60   30.50
   0   7   5  986.70   40.80
   0   7   5 1001.50   35.50
   0   7  -5 1002.10   30.80
   0   7   5 1001.00   36.00
   0   7  -5  986.90   32.20
   0   7   5  936.11   48.00
   0   7   5  973.30   33.90
  -1  -7  -5  135.49    6.70
  -1  -7  -5  129.99    6.50
   1  -7   5  141.89    8.30
   1  -7   5  137.09    8.90
   1  -7   5  133.09    8.00
   1  -7   5  140.49    9.10
   1   7   5  149.09   13.10
   1   7   5  150.28    9.10
  -1   7  -5  143.19    6.80
  -1   7  -5  142.19    7.70
   1   7   5  134.69   10.60
  -1   7  -5  145.89    7.30
   1   7   5  138.49    9.20
   1   7   5  147.19    9.10
   2  -7   5   94.19    7.50
  -2  -7  -5   97.79    5.20
   2  -7   5   87.39    7.30
   2  -7   5   90.39    6.80
   2  -7   5   86.19    6.50
   2   7   5   97.89    7.60
   2   7   5   91.19    9.20
   2   7   5   94.69    7.20
   2   7   5   92.59   10.70
   2   7   5   94.59    7.00
  -2   7  -5   93.59    6.10
   2   7   5   92.39    7.10
  -2   7  -5   97.39    5.70
  -2   7  -5   96.99    6.10
  -3  -7  -5    2.40    1.00
   3  -7   5    5.40    2.40
   3  -7   5    2.60    1.90
   3  -7   5    2.40    2.20
  -3  -7  -5    2.50    1.40
   3  -7   5    3.30    1.80
   3   7   5    1.50    2.40
  -3   7  -5    6.60    2.90
   3   7   5    4.30    2.10
   3   7   5    4.40    3.40
   3   7   5    5.90    4.80
   3   7   5    2.10    1.80
  -3   7  -5    3.00    1.30
  -3   7  -5    1.30    1.40
   4  -7   5  116.79    6.80
   4  -7   5  115.69    5.80
  -4  -7  -5  110.69    5.30
  -4  -7  -5  105.39    5.40
  -4   7  -5  107.69    5.80
   4   7   5  104.69    7.20
   4   7   5  116.59    7.90
  -4   7  -5  108.69    5.90
   4   7   5  111.89   10.30
   4   7   5  111.39    7.00
  -4   7  -5  112.19    6.60
   4   7   5  126.69    9.10
   5  -7   5   45.40    3.20
   5   7   5   47.30    4.80
  -5   7  -5   42.80    2.90
  -5   7  -5   43.80    2.90
   5   7   5   41.00    4.70
  -5   7  -5   38.10    3.00
  -6   8   5   44.40    2.80
   6   8  -5   36.30    3.50
   6   8  -5   38.10    3.00
   6   8  -5   41.90    2.80
   5  -8  -5  129.89    7.10
  -5  -8   5  145.19    6.00
  -5  -8   5  155.58    7.00
   5  -8  -5  158.78    7.10
  -5  -8   5  140.99    6.70
   5   8  -5  141.69   11.60
  -5   8   5  158.58    7.30
   5   8  -5  150.68    7.10
   5   8  -5  146.69    6.90
   5   8  -5  136.99    8.90
   5   8  -5  149.09    7.40
  -5   8   5  142.39    7.00
   4  -8  -5  300.97   13.80
   4  -8  -5  291.67   12.00
   4  -8  -5  302.67   13.00
  -4  -8   5  305.47   12.40
  -4  -8   5  296.87   12.00
  -4   8   5  312.27   12.50
   4   8  -5  274.27   12.30
   4   8  -5  296.77   14.90
   4   8  -5  286.27   12.00
  -4   8   5  294.07   12.30
   4   8  -5  307.77   12.30
   4   8  -5  295.57   18.30
  -3  -8   5  482.85   18.50
   3  -8  -5  499.45   17.70
   3  -8  -5  497.05   17.20
   3  -8  -5  486.95   19.60
  -3  -8   5  508.25   19.10
   3  -8  -5  493.35   18.80
   3   8  -5  471.15   20.80
  -3   8   5  492.15   20.00
   3   8  -5  515.05   25.20
  -3   8   5  509.45   18.30
   3   8  -5  494.25   18.50
  -3   8   5  491.85   17.90
   3   8  -5  500.35   18.00
   3   8  -5  467.65   17.80
   2  -8  -5  381.16   15.50
   2  -8  -5  410.36   34.10
   2  -8  -5  383.76   13.80
  -2  -8   5  374.06   16.10
   2  -8  -5  404.76   16.30
  -2  -8   5  377.66   15.90
   2  -8  -5  384.86   14.30
   2   8  -5  371.66   33.80
   2   8  -5  387.86   20.40
  -2   8   5  388.36   13.30
   2   8  -5  395.46   15.40
  -2   8   5  410.46   18.00
  -2   8   5  377.76   14.50
  -2   8   5  402.06   32.10
   1  -8  -5  480.05   24.80
  -1  -8   5  433.36   19.60
   1  -8  -5  428.66   16.20
   1  -8  -5  408.56   15.20
   1  -8  -5  433.66   17.00
  -1  -8   5  443.46   18.00
  -1  -8   5  441.16   18.20
   1   8  -5  410.56   36.10
  -1   8   5  464.95   19.90
   1   8  -5  436.66   21.00
  -1   8   5  428.46   14.80
   1   8  -5  443.36   16.90
  -1   8   5  415.66   36.40
  -1   8   5  430.66   17.90
   0  -8   5  652.43   23.50
   0  -8   5  658.83   25.30
   0  -8  -5  637.64   22.00
   0  -8   5  610.54   23.40
   0  -8  -5  634.24   36.40
   0  -8  -5  683.73   22.70
   0  -8   5  685.63   25.80
   0   8  -5  666.73   23.30
   0   8   5  686.13   31.70
   0   8  -5  599.14   20.80
   0   8  -5  700.43   28.10
   0   8  -5  660.23   46.00
   0   8   5  680.83   25.00
   0   8   5  631.24   26.00
   1  -8   5  829.52   30.00
   1  -8   5  814.72   30.50
  -1  -8  -5  843.92   26.80
   1  -8   5  805.62   28.40
   1  -8   5  774.82   28.10
  -1  -8  -5  787.52   26.10
  -1   8  -5  836.92   28.00
  -1   8  -5  842.32   26.30
   1   8   5  807.72   32.00
   1   8   5  783.62   36.30
   1   8   5  828.32   29.90
  -1   8  -5  819.22   26.10
   1   8   5  831.42   30.80
  -2  -8  -5   20.40    2.20
   2  -8   5   17.10    3.50
   2  -8   5   15.70    3.10
  -2  -8  -5   17.10    2.50
   2  -8   5   17.00    3.60
   2  -8   5   15.80    3.60
   2   8   5   15.70    3.30
   2   8   5   18.20    4.90
  -2   8  -5   15.40    2.30
   2   8   5   18.80    4.10
  -2   8  -5   18.10    3.30
   2   8   5   16.30    3.60
  -2   8  -5   20.00    2.40
   2   8   5   18.10    5.80
   3  -8   5  253.97   12.10
   3  -8   5  256.47   11.80
   3  -8   5  265.77   11.30
  -3  -8  -5  257.87    9.80
  -3   8  -5  240.58   10.70
   3   8   5  267.37   17.30
   3   8   5  270.67   14.40
  -3   8  -5  274.47   10.60
   3   8   5  257.47   11.80
  -3   8  -5  247.38   10.90
   4  -8   5   79.39    3.60
  -4   8  -5   67.49    4.30
   4   8   5   74.69    7.50
  -4   8  -5   77.59    4.40
   5  -8   5    2.10    0.80
  -5   8  -5    3.20    0.70
   5   8   5    4.90    2.50
  -5   8  -5    2.60    0.80
   5  -9  -5   10.00    1.80
   5  -9  -5    9.10    1.80
   5   9  -5   10.50    3.80
   5   9  -5    8.30    1.70
   5   9  -5    8.90    2.00
   5   9  -5    7.50    1.40
  -5   9   5   10.10    1.50
   5   9  -5    8.50    2.40
  -4  -9   5    6.90    2.60
   4  -9  -5    6.70    1.70
   4  -9  -5    4.90    2.20
   4  -9  -5    5.70    2.10
   4  -9  -5    4.20    1.80
  -4  -9   5    4.80    1.60
   4   9  -5    7.60    2.10
   4   9  -5    3.10    2.10
   4   9  -5    6.70    3.20
  -4   9   5    5.00    1.50
   4   9  -5    4.90    1.40
   4   9  -5    5.70    1.60
   3  -9  -5  149.99    8.10
   3  -9  -5  137.59    8.40
   3  -9  -5  138.99    6.60
   3  -9  -5  135.89    6.70
  -3  -9   5  151.58    7.60
  -3  -9   5  143.29    7.60
   3   9  -5  128.69    6.80
  -3   9   5  132.99    8.00
   3   9  -5  137.19    7.40
   3   9  -5  136.69   11.30
  -3   9   5  131.39    6.50
  -2  -9   5  293.37   13.10
   2  -9  -5  313.17   13.60
   2  -9  -5  305.07   11.40
  -2  -9   5  300.17   13.40
   2  -9  -5  296.17   13.00
  -2   9   5  309.17   14.80
   2   9  -5  317.37   12.20
   2   9  -5  296.37   12.80
  -2   9   5  284.47   11.20
   1  -9  -5  215.98    8.70
  -1  -9   5  215.68   11.20
  -1  -9   5  223.88   11.30
   1  -9  -5  219.78   10.00
  -1  -9   5  197.58   10.10
   1  -9  -5  230.98   10.70
  -1   9   5  232.48   12.70
   1   9  -5  221.68   10.40
   1   9  -5  230.48   13.60
   0  -9   5  839.72   30.20
   0  -9  -5  899.91   29.30
   0  -9  -5  938.51   30.10
   0  -9   5  895.91   32.00
   0  -9   5  891.11   30.40
   0  -9   5  897.51   32.60
   0   9  -5  904.51   27.10
   0   9  -5  900.51   30.40
   0   9   5  957.20   33.90
   0   9   5  900.41   31.70
   0   9   5  928.51   39.30
   1  -9   5    5.40    2.20
  -1  -9  -5   10.80    2.20
  -1  -9  -5    9.10    2.00
   1  -9   5    3.70    2.00
   1  -9   5    5.40    2.50
   1   9   5    7.40    2.40
   1   9   5   11.70    5.10
  -1   9  -5    8.30    2.40
  -1   9  -5    8.60    2.20
   1   9   5    6.90    2.50
   2  -9   5   12.00    3.10
  -2  -9  -5   14.40    2.40
   2  -9   5   15.20    2.80
   2  -9   5   13.50    2.80
   2  -9   5   12.70    2.90
  -2   9  -5   13.30    1.80
   2   9   5   17.80    5.40
   2   9   5   13.50    2.90
   2   9   5   12.30    4.80
  -2   9  -5   13.70    2.70
   2   9   5   14.80    3.10
   3  -9   5   19.10    2.90
   3  -9   5   19.90    3.80
   3  -9   5   23.50    3.10
   3  -9   5   21.50    3.30
   3   9   5   21.80    5.30
   3   9   5   25.50    5.30
  -3   9  -5   21.20    1.90
  -3   9  -5   22.10    2.50
   3   9   5   20.20    3.60
  -3   9  -5   18.60    2.00
   4  -9   5   16.90    2.50
   4   9   5   20.80    4.10
  -4   9  -5   17.70    1.80
   4   9   5   16.40    3.90
  -4   9  -5   16.80    1.60
   5 -10  -5   74.99    3.60
   5  10  -5   66.39    3.30
   4 -10  -5    6.50    2.00
   4 -10  -5    9.30    1.70
   4 -10  -5    6.90    2.10
  -4  10   5    8.30    0.90
   4  10  -5    9.00    1.90
   4  10  -5   11.50    2.00
   4  10  -5    9.00    3.10
   3 -10  -5  227.18    9.00
   3 -10  -5  219.88   10.20
   3 -10  -5  217.88   10.70
  -3 -10   5  231.38    9.90
  -3 -10   5  209.88    9.50
   3  10  -5  227.38   13.60
  -3  10   5  224.18   10.70
   3  10  -5  230.38    9.40
   3  10  -5  231.68    9.70
   2 -10  -5  607.64   22.30
   2 -10  -5  614.04   20.20
  -2 -10   5  596.44   21.30
   2 -10  -5  611.44   19.80
   2 -10  -5  609.04   21.30
  -2 -10   5  593.24   20.90
  -2 -10   5  598.84   24.20
  -2  10   5  574.04   22.60
   2  10  -5  637.84   21.30
   2  10  -5  607.54   20.50
   2  10  -5  576.54   25.30
  -1 -10   5  242.88   11.50
  -1 -10   5  256.77   11.00
   1 -10  -5  258.97   11.40
  -1 -10   5  249.38   11.90
   1 -10  -5  248.28    9.50
   1 -10  -5  242.08   11.00
  -1  10   5  244.08   12.80
   1  10  -5  261.27   11.00
   1  10  -5  244.18   10.00
   0 -10  -5    4.60    1.60
   0 -10  -5    2.40    1.50
   0 -10   5    6.30    2.30
   0 -10   5    3.20    1.80
   0 -10   5    1.80    1.80
   0 -10  -5    5.60    1.20
   0  10   5    4.80    2.20
   0  10  -5    3.50    1.50
  -1 -10  -5  228.18    9.40
   1 -10   5  226.68   10.40
   1 -10   5  217.58   10.00
   1 -10   5  221.18   12.00
   1 -10   5  241.18   11.60
  -1 -10  -5  223.08    9.10
   1  10   5  228.18   15.80
   1  10   5  226.78   11.50
  -1  10  -5  223.58   10.00
   2 -10   5   83.19    5.50
   2 -10   5   79.89    5.80
   2 -10   5   82.99    6.20
  -2  10  -5   72.79    3.20
   2  10   5   79.39    9.00
   2  10   5   69.59    5.20
  -2  10  -5   74.89    4.60
   3 -10   5  192.48    8.50
   3 -10   5  216.18    8.80
   3 -10   5  206.38    8.00
   3  10   5  171.38   11.40
  -3  10  -5  213.08    8.10
  -4  10  -5   41.20    2.60
   4 -11  -5  194.68    7.10
   4  11  -5  206.08    7.10
   4  11  -5  183.08    6.90
   3 -11  -5   20.30    3.10
   3 -11  -5   23.30    2.20
   3 -11  -5   19.40    2.50
   3  11  -5   19.60    2.00
   3  11  -5   25.40    2.20
  -3  11   5   20.20    3.20
   2 -11  -5  295.67   11.80
  -2 -11   5  280.77   11.30
   2 -11  -5  302.07   10.60
  -2 -11   5  275.97   11.40
  -2 -11   5  287.27   10.60
   2 -11  -5  272.57   12.10
   2  11  -5  308.47   12.00
   2  11  -5  296.47   10.70
  -2  11   5  301.27   12.50
  -1 -11   5  105.09    6.20
   1 -11  -5  110.39    4.90
   1 -11  -5  106.79    6.20
  -1 -11   5  112.29    5.90
   1 -11  -5  102.89    5.70
  -1 -11   5  107.89    6.40
   1  11  -5  110.69    5.20
  -1  11   5  103.99    6.90
   1  11  -5  107.99    5.80
   0 -11   5   96.19    6.10
   0 -11   5   94.89    6.20
   0 -11  -5  100.19    4.50
   0 -11  -5  104.59    5.60
   0 -11   5   99.49    5.60
   0 -11  -5   89.99    5.10
   0  11  -5   93.99    5.40
   0  11  -5   96.89    4.60
   0  11   5   91.89    6.60
   1 -11   5   40.30    4.00
   1 -11   5   39.30    3.80
   1 -11   5   47.20    3.80
  -1  11  -5   39.50    3.10
   1  11   5   42.70    4.30
  -1  11  -5   36.50    2.40
   2 -11   5    3.30    1.20
   2 -11   5    3.20    1.50
   2 -11   5    2.10    1.40
  -2  11  -5    2.00    0.80
   2  11   5    2.30    2.70
   3 -11   5   42.40    2.90
  -3  11  -5   50.19    2.50
   3 -12  -5   80.29    3.90
   3  12  -5   83.29    3.60
   2 -12  -5    2.30    1.30
   2 -12  -5    4.30    1.20
   2  12  -5    7.80    1.50
   2  12  -5    4.70    1.10
  -2  12   5    6.30    2.60
   1 -12  -5   14.60    2.00
  -1 -12   5   12.50    2.00
   1 -12  -5   15.30    1.60
  -1 -12   5   10.70    2.00
   1  12  -5   16.00    1.50
  -1  12   5   12.30    2.70
   1  12  -5   12.30    1.60
   0 -12   5  602.04   19.50
   0  12  -5  620.34   19.60
   1 -12   5   17.60    2.10
   1 -12   5   17.70    2.00
  -1  12  -5   16.30    1.60
   1  12   5   20.30    3.40
  -2  12  -5   29.90    1.80
   8   0  -6    9.90    1.70
   7   0  -6  128.79    6.10
   7   0  -6  127.89    8.70
  -7   0   6  132.39    6.50
  -7   0   6  132.69    5.90
  -7   0   6  143.59    5.30
   7   0  -6  129.29    6.20
  -6   0   6    0.10    1.10
   6   0  -6    1.70    1.30
  -6   0   6    1.50    1.30
   6   0  -6    2.00    1.40
  -6   0   6    2.20    2.00
  -6   0   6    1.20    1.10
  -6   0   6    1.70    1.10
   6   0  -6    2.00    1.90
  -5   0   6  667.03   34.00
   5   0  -6  624.44   21.90
   5   0  -6  654.13   23.20
  -5   0   6  625.44   24.80
  -5   0   6  665.53   23.80
  -5   0   6  625.84   22.60
  -5   0   6  642.44   21.40
  -5   0   6  647.34   26.20
   4   0  -6   43.70    4.10
   4   0  -6   53.09    4.20
  -4   0   6   51.39    4.30
  -4   0   6   44.60    4.10
  -4   0   6   46.00    5.20
   4   0  -6   48.30    5.30
  -4   0   6   59.09   11.50
  -4   0   6   29.30    6.30
  -4   0   6   45.50    3.40
  -3   0   6  233.48    9.90
  -3   0   6  223.38   10.30
  -3   0   6  216.08   24.30
   3   0  -6  210.48   16.50
  -2   0   6  576.64   37.60
  -2   0   6  573.04   22.80
  -2   0   6  573.24   20.00
   2   0  -6  554.04   21.50
  -2   0   6  582.34   19.50
   2   0  -6  542.75   19.00
   1   0  -6 1215.68   38.30
   1   0  -6 1235.08   43.30
   1   0  -6 1302.67   38.50
   1   0  -6 1244.08   39.10
  -1   0   6 1252.97   39.40
   0   0  -6   55.79    3.70
   0   0  -6   58.79    3.50
   0   0  -6   62.39    4.20
  -1   0  -6   67.49    4.20
  -1   0  -6   63.69    6.60
  -1   0  -6   60.99    3.70
  -1   0  -6   63.89    4.60
  -2   0  -6  359.96   15.30
  -2   0  -6  386.96   14.30
  -2   0  -6  358.66   12.70
  -2   0  -6  407.16   21.00
  -2   0  -6  411.26   14.30
  -3   0  -6   15.90    2.10
  -3   0  -6   15.90    4.80
   3   0   6   14.50    3.00
  -3   0  -6   14.80    3.30
  -3   0  -6   15.80    2.70
  -3   0  -6   20.20    2.60
   3   0   6   19.40    3.40
  -4   0  -6  393.86   16.80
  -4   0  -6  388.46   14.80
   4   0   6  396.86   16.30
  -4   0  -6  389.76   13.50
   5   0   6  141.39   12.10
  -5   0  -6  148.89    6.90
   5   0   6  157.28    8.30
  -5   0  -6  151.68    6.00
  -5   0  -6  147.09    7.40
   5   0   6  141.89    7.30
  -6   0  -6   75.89    3.00
   6   0   6   74.59    4.40
   6   0   6   68.69    6.40
   7  -1  -6   70.99    5.80
  -7  -1   6   67.79    3.80
   7  -1  -6   64.69    3.90
  -7  -1   6   80.19    6.70
  -7  -1   6   73.79    4.10
   7  -1  -6   78.19    5.80
   7  -1  -6   70.59    5.30
   7   1  -6   61.69    5.10
   7   1  -6   65.99    5.70
  -7   1   6   68.99    3.10
   7   1  -6   66.59    3.70
  -7   1   6   75.79    4.50
   7   1  -6   68.19    4.30
  -6  -1   6   86.09    5.50
   6  -1  -6   80.99    5.10
  -6  -1   6   85.19    6.00
   6  -1  -6   91.59    5.40
  -6  -1   6   80.89    5.30
  -6  -1   6   86.79    4.80
  -6   1   6   85.89    5.30
  -6   1   6   94.49    5.70
   6   1  -6   92.79    5.80
   6   1  -6   79.69    5.10
   6   1  -6   82.49    6.90
  -6   1   6   81.19    6.00
  -6   1   6   81.39    5.70
  -6   1   6   86.59    4.40
   6   1  -6   78.69    7.80
  -6   1   6   80.09    6.80
  -5  -1   6  472.55   20.70
   5  -1  -6  466.25   18.10
   5  -1  -6  467.95   16.20
  -5  -1   6  455.75   17.40
  -5  -1   6  474.05   18.70
  -5  -1   6  475.15   46.80
  -5  -1   6  471.75   27.90
  -5  -1   6  471.95   16.50
  -5   1   6  468.05   16.00
  -5   1   6  510.75   22.20
  -5   1   6  450.25   20.70
  -5   1   6  443.36   27.20
  -5   1   6  470.65   17.50
  -5   1   6  445.56   19.00
   5   1  -6  438.66   16.70
   5   1  -6  464.55   17.70
   5   1  -6  459.45   22.60
  -5   1   6  484.15   18.30
  -4  -1   6  954.80   32.50
  -4  -1   6  985.40   31.30
  -4  -1   6  991.20   36.40
  -4  -1   6 1063.19   33.10
  -4  -1   6 1010.40   66.09
   4  -1  -6  990.80   32.70
   4  -1  -6  960.00   31.00
  -4   1   6  939.31   42.30
  -4   1   6  986.40   33.10
  -4   1   6  980.70   31.00
   4   1  -6  994.40   32.20
  -4   1   6 1019.90   32.20
  -4   1   6  998.20   65.79
  -4   1   6  970.60   32.40
  -4   1   6  999.90   36.40
   4   1  -6 1043.50   37.70
   3  -1  -6 1085.49   36.20
   3  -1  -6 1134.59   35.40
  -3  -1   6 1084.39   38.70
  -3  -1   6 1101.09   35.90
  -3  -1   6 1065.59   35.10
   3  -1  -6 1123.79   48.90
  -3  -1   6 1034.30   61.19
  -3   1   6 1100.39   34.70
  -3   1   6 1066.29   35.30
  -3   1   6 1130.79   38.80
  -3   1   6 1128.39   64.59
  -2  -1   6  954.70   31.50
   2  -1  -6  932.81   30.30
   2  -1  -6  915.31   29.80
  -2  -1   6  946.41   30.90
   2  -1  -6  999.90   37.40
  -2   1   6  941.11   51.19
  -2   1   6  951.80   34.10
  -2   1   6  948.51   30.10
  -2   1   6  952.80   30.90
   2   1  -6  967.60   37.80
   2   1  -6 1001.00   35.50
   1  -1  -6 1144.59   34.40
   1  -1  -6 1133.59   34.80
   1  -1  -6 1140.99   40.50
  -1  -1   6 1123.09   36.00
  -1  -1   6 1060.99   35.30
  -1   1   6 1039.90   34.90
   1   1  -6 1090.59   34.50
   1   1  -6 1215.58   35.70
   1   1  -6 1099.59   38.70
  -1   1   6 1170.18   51.69
   0  -1  -6 2625.34   72.89
   0  -1  -6 2502.35   73.59
   0  -1   6 2380.86   72.99
   0  -1   6 2463.35   73.79
   0  -1  -6 2360.06   72.79
   0   1  -6 2506.75   73.49
   0   1  -6 2469.55   72.29
   0   1  -6 2345.27   71.79
   0   1   6 2440.66   82.59
   1  -1   6  194.18    8.30
  -1  -1  -6  181.28    8.70
  -1  -1  -6  173.78    7.80
  -1  -1  -6  189.28   12.20
   1  -1   6  172.28    8.60
  -1  -1  -6  167.18    7.40
  -1   1  -6  165.48    7.30
  -1   1  -6  179.68    8.70
  -1   1  -6  210.18   12.70
  -2  -1  -6   93.09    6.40
  -2  -1  -6   84.59    8.50
  -2  -1  -6   99.99    5.50
   2  -1   6   84.89    5.60
  -2  -1  -6   84.49    4.20
  -2   1  -6   92.49    9.20
  -2   1  -6   77.59    4.10
  -2   1  -6   84.39    4.80
  -2   1  -6   87.49    5.20
  -2   1  -6   85.89    6.00
  -3  -1  -6  554.54   21.40
  -3  -1  -6  563.34   19.70
  -3  -1  -6  557.24   18.30
  -3  -1  -6  584.64   28.30
   3  -1   6  560.74   20.50
  -3  -1  -6  571.24   20.30
  -3   1  -6  572.74   18.30
   3   1   6  584.94   21.30
  -3   1  -6  546.15   20.00
   3   1   6  533.25   22.50
  -3   1  -6  580.04   21.90
  -3   1  -6  579.04   20.20
  -3   1  -6  565.84   28.80
  -3   1  -6  577.84   19.60
   4  -1   6  131.39    7.90
  -4  -1  -6  135.19    7.00
  -4  -1  -6  140.39    6.00
  -4   1  -6  122.89    8.40
  -4   1  -6  127.29    7.00
  -4   1  -6  124.59    8.00
   4   1   6  127.39    8.90
  -4   1  -6  136.59    6.80
   4   1   6  132.19    8.00
  -4   1  -6  133.49    5.80
  -5  -1  -6   22.10    2.10
   5  -1   6   22.30    3.40
  -5  -1  -6   19.70    3.30
  -5  -1  -6   23.00    2.50
  -5   1  -6   25.80    3.80
  -5   1  -6   26.20    2.50
  -5   1  -6   24.90    2.90
   5   1   6   24.50    3.30
   5   1   6   21.80    3.50
   5   1   6   22.90    5.70
  -5   1  -6   23.80    2.00
   6  -1   6  185.38    7.80
   6  -1   6  179.68   10.70
  -6  -1  -6  187.68    6.20
  -6  -1  -6  189.28    8.60
  -6   1  -6  177.78    5.80
   6   1   6  181.88   10.70
   7  -2  -6   11.60    1.80
  -7  -2   6   10.30    1.60
  -7  -2   6   12.80    1.50
   7  -2  -6    9.30    2.20
  -7  -2   6   10.20    1.80
   7   2  -6   11.40    2.50
   7   2  -6   12.20    2.30
  -7   2   6   10.50    2.40
  -7   2   6   10.10    1.70
   7   2  -6   11.60    2.90
  -7   2   6    8.30    1.90
   6  -2  -6   29.70    3.00
  -6  -2   6   31.50    3.30
  -6  -2   6   31.30    2.80
  -6  -2   6   31.90    3.70
  -6  -2   6   31.30    3.30
   6  -2  -6   27.40    3.00
   6   2  -6   31.80    3.30
   6   2  -6   31.60    2.90
  -6   2   6   28.20    2.90
  -6   2   6   32.20    5.40
  -6   2   6   32.40    3.40
   6   2  -6   32.90    4.10
  -6   2   6   31.50    2.30
  -6   2   6   29.40    3.80
   6   2  -6   35.00    4.60
   6   2  -6   33.40    3.60
   6   2  -6   37.80    5.80
  -5  -2   6  273.67   34.50
  -5  -2   6  257.77   11.60
   5  -2  -6  254.97   10.40
  -5  -2   6  261.17   18.90
  -5  -2   6  250.77   11.10
  -5  -2   6  254.07   10.40
  -5  -2   6  249.28   12.20
  -5   2   6  239.48   11.30
   5   2  -6  276.67   13.60
   5   2  -6  266.07   11.20
   5   2  -6  263.87   10.70
  -5   2   6  248.08   11.10
  -5   2   6  262.77    9.60
  -5   2   6  257.47   10.70
  -5   2   6  233.28   13.60
  -5   2   6  251.37   12.70
   5   2  -6  278.17   16.60
  -4  -2   6 2367.96   71.59
   4  -2  -6 2348.76   68.89
  -4  -2   6 2093.89   69.89
   4  -2  -6 2317.57   70.59
  -4  -2   6 2429.26   70.79
  -4  -2   6 2230.38  110.49
  -4  -2   6 2222.28   68.99
   4  -2  -6 2285.27   67.59
  -4  -2   6 2359.96   74.49
  -4   2   6 2224.38   82.09
  -4   2   6 2293.17   68.99
   4   2  -6 2436.96   76.69
  -4   2   6 2441.76   74.79
  -4   2   6 2386.96   70.39
   4   2  -6 2350.26   69.09
  -4   2   6 2305.07   67.99
   4   2  -6 2354.16   69.49
  -4   2   6 2306.77   69.89
   4   2  -6 2277.37   69.39
   3  -2  -6  747.83   22.80
   3  -2  -6  714.23   23.90
  -3  -2   6  727.63   28.00
  -3  -2   6  738.33   24.90
   3  -2  -6  679.33   23.00
   3  -2  -6  744.63   24.60
   3  -2  -6  759.82   39.40
  -3   2   6  748.93   27.80
   3   2  -6  652.43   23.40
  -3   2   6  658.43   23.80
  -3   2   6  739.33   23.50
  -3   2   6  712.03   32.50
  -3   2   6  733.93   24.40
  -2  -2   6  456.35   16.90
  -2  -2   6  427.06   17.10
   2  -2  -6  417.96   21.80
   2  -2  -6  461.45   15.90
   2  -2  -6  462.05   16.40
   2   2  -6  477.25   25.70
  -2   2   6  490.25   34.60
  -2   2   6  472.25   29.40
   1  -2  -6  522.35   23.50
  -1  -2   6  529.15   19.10
   1  -2  -6  539.25   18.30
  -1  -2   6  526.05   19.50
   1  -2  -6  529.05   17.80
  -1   2   6  526.55   21.10
  -1   2   6  538.35   31.30
   1   2  -6  548.85   18.80
   0  -2   6 1686.53   51.09
   0  -2  -6 1679.93   49.50
   0  -2  -6 1662.43   49.90
   0  -2  -6 1624.24   50.79
   0  -2   6 1491.05   54.29
   0   2  -6 1738.63   51.09
   0   2  -6 1622.74   52.69
   0   2  -6 1701.03   49.90
  -1  -2  -6 1531.35   46.60
  -1  -2  -6 1586.14   53.99
  -1  -2  -6 1485.75   46.00
   1  -2   6 1551.04   47.60
  -1  -2  -6 1531.15   47.70
  -1   2  -6 1509.45   54.19
  -1   2  -6 1499.85   46.30
  -1   2  -6 1595.34   48.10
  -1   2  -6 1467.75   45.70
  -2  -2  -6  557.64   18.60
  -2  -2  -6  579.94   19.20
  -2  -2  -6  521.55   20.10
  -2  -2  -6  558.64   25.80
   2  -2   6  529.85   19.10
  -2  -2  -6  524.95   17.40
   2  -2   6  513.75   18.10
  -2   2  -6  544.45   18.90
  -2   2  -6  516.95   19.00
   2   2   6  616.04   35.10
   2   2   6  520.95   21.90
  -2   2  -6  554.54   18.20
  -2   2  -6  541.65   20.40
  -2   2  -6  524.95   26.40
  -2   2  -6  528.35   18.20
   2   2   6  549.35   19.90
  -3  -2  -6  280.37   11.50
   3  -2   6  279.07   12.50
  -3  -2  -6  283.47   10.40
  -3  -2  -6  283.47   18.00
  -3  -2  -6  296.87   12.10
  -3   2  -6  272.37   19.70
   3   2   6  293.37   15.20
  -3   2  -6  287.17   10.10
  -3   2  -6  288.67   12.10
  -3   2  -6  269.47   11.60
  -3   2  -6  269.97   10.90
   3   2   6  306.07   19.20
  -3   2  -6  286.47   13.50
   3   2   6  296.37   13.00
  -4  -2  -6   60.09    4.40
  -4  -2  -6   61.19    4.60
  -4  -2  -6   57.89    3.60
   4  -2   6   70.79    5.00
  -4   2  -6   58.29    4.50
   4   2   6   58.29    8.60
   4   2   6   60.59    5.30
  -4   2  -6   59.49    4.00
  -4   2  -6   61.29    5.40
   4   2   6   59.39    6.50
  -4   2  -6   60.39    3.30
  -4   2  -6   56.69    4.40
  -5  -2  -6  118.99    6.40
  -5  -2  -6  117.39    6.00
  -5  -2  -6  122.19    5.10
   5  -2   6  116.99    6.90
   5   2   6  109.59    7.90
  -5   2  -6  117.39    4.60
   5   2   6  117.39    7.10
  -5   2  -6  116.99    5.90
   5   2   6  112.09    6.20
  -5   2  -6  120.39    6.00
  -5   2  -6  112.29    7.10
   5   2   6  101.09   10.00
   5   2   6  111.89    7.00
  -6  -2  -6   17.00    1.30
   6  -2   6   18.90    3.90
   6  -2   6   17.50    2.00
   6   2   6   18.80    3.90
   6   2   6   12.60    2.00
  -7  -3   6   12.20    2.00
  -7  -3   6   15.70    1.80
  -7  -3   6   16.00    1.70
   7  -3  -6   11.30    1.90
   7  -3  -6   14.20    2.40
   7   3  -6   13.50    2.70
  -7   3   6    8.70    2.10
   7   3  -6    9.20    3.10
   7   3  -6   16.40    2.70
  -7   3   6   15.00    2.10
  -6  -3   6   56.49    3.80
   6  -3  -6   60.99    3.90
  -6  -3   6   59.09    4.90
  -6  -3   6   63.09    4.90
  -6  -3   6   63.09    4.20
   6   3  -6   62.69    5.50
   6   3  -6   64.49    4.90
  -6   3   6   60.99    5.10
   6   3  -6   58.89    3.90
  -6   3   6   62.09    4.30
   6   3  -6   53.99    6.90
   6   3  -6   56.29    5.70
  -6   3   6   54.59    5.40
  -5  -3   6  861.51   29.60
  -5  -3   6  889.71   30.50
  -5  -3   6  888.91   31.40
  -5  -3   6 1066.59   55.99
  -5  -3   6  878.61   29.00
   5  -3  -6  938.71   29.30
   5   3  -6  895.21   33.00
   5   3  -6  939.91   30.20
  -5   3   6  904.31   31.80
  -5   3   6  874.21   27.20
  -5   3   6  858.41   33.60
   5   3  -6  894.91   29.40
   5   3  -6  936.51   37.70
  -5   3   6  883.21   29.60
   4  -3  -6  130.29    7.70
  -4  -3   6  128.39    6.80
  -4  -3   6  131.19   22.20
   4  -3  -6  132.49    7.20
  -4  -3   6  150.78    7.90
  -4  -3   6  139.49    7.60
  -4  -3   6  130.29    8.10
   4  -3  -6  132.49    9.30
   4  -3  -6  132.59    6.70
   4  -3  -6  132.59    6.10
   4   3  -6  136.59    6.80
  -4   3   6  129.99    5.60
   4   3  -6  146.89    7.30
  -4   3   6  135.49    8.70
  -4   3   6  122.19    9.10
   4   3  -6  134.69    6.80
   4   3  -6  141.89    8.80
  -4   3   6  144.29    7.30
   4   3  -6  146.69   11.20
   3  -3  -6  180.78    9.00
   3  -3  -6  187.38    9.00
  -3  -3   6  205.18   11.60
  -3  -3   6  183.98    8.40
   3  -3  -6  189.78    8.70
  -3  -3   6  171.58    8.70
  -3  -3   6  184.18    9.60
   3  -3  -6  182.58   18.80
   3   3  -6  187.68    8.30
   3   3  -6  188.68    8.50
  -3   3   6  186.38   11.00
  -3   3   6  174.38    8.30
   3   3  -6  206.68   17.70
   2  -3  -6  212.08    9.20
  -2  -3   6  194.98    9.60
  -2  -3   6  206.08   10.00
   2  -3  -6  200.78    8.70
   2  -3  -6  192.38   13.80
  -2   3   6  202.48   11.20
  -2   3   6  222.68   20.20
  -1  -3   6  720.23   25.10
   1  -3  -6  731.73   23.20
  -1  -3   6  717.63   24.60
   1  -3  -6  701.43   23.50
   1  -3  -6  702.23   29.90
  -1   3   6  678.93   26.30
  -1   3   6  725.73   42.30
   1   3  -6  718.13   24.10
   0  -3  -6  877.81   28.20
   0  -3   6  905.11   30.60
   0  -3   6  912.41   30.20
   0  -3  -6  893.31   28.60
   0   3  -6  899.21   29.70
   0   3  -6  910.61   29.70
   1  -3   6 3149.78   94.79
  -1  -3  -6 3272.77  102.29
  -1  -3  -6 3148.39   93.49
   1  -3   6 3190.38   95.69
  -1  -3  -6 3257.07   94.09
   1  -3   6 3167.78   96.29
  -1   3  -6 3196.48  103.19
  -1   3  -6 3266.27   95.69
   2  -3   6  652.23   24.60
  -2  -3  -6  687.93   22.50
   2  -3   6  662.23   22.70
   2  -3   6  674.43   24.20
  -2  -3  -6  685.03   29.60
  -2  -3  -6  652.03   23.00
   2   3   6  669.83   24.00
   2   3   6  685.73   26.70
  -2   3  -6  682.63   32.00
  -2   3  -6  687.73   21.90
  -2   3  -6  663.93   20.70
   2   3   6  706.23   31.50
  -2   3  -6  681.43   23.10
  -2   3  -6  674.03   24.60
  -3  -3  -6  563.84   21.30
   3  -3   6  575.94   19.00
  -3  -3  -6  558.24   27.20
   3  -3   6  562.74   21.40
  -3  -3  -6  554.44   20.00
  -3  -3  -6  574.74   19.60
   3   3   6  594.94   29.30
   3   3   6  509.15   43.00
  -3   3  -6  536.45   18.50
  -3   3  -6  524.15   21.60
   3   3   6  584.04   22.10
  -4  -3  -6  237.18   10.80
  -4  -3  -6  252.37   10.50
   4  -3   6  238.18   11.00
  -4  -3  -6  235.48    9.20
   4   3   6  259.87   13.80
  -4   3  -6  245.98   10.80
  -4   3  -6  271.87   15.80
   4   3   6  255.97   12.90
  -4   3  -6  247.98    8.50
   4   3   6  252.87   12.20
   4   3   6  244.38   11.80
   4   3   6  245.08   17.60
  -5  -3  -6   47.70    3.70
   5  -3   6   49.80    4.10
  -5  -3  -6   48.00    2.80
  -5  -3  -6   45.90    3.40
   5   3   6   50.19    4.30
   5   3   6   40.80    3.60
  -5   3  -6   48.30    3.60
   5   3   6   43.30    4.10
  -5   3  -6   37.90    3.90
   5   3   6   40.10    6.10
   5   3   6   47.90    6.70
   6  -3   6   74.79    6.20
   6  -3   6   73.39    3.90
  -6  -3  -6   68.79    3.40
  -6  -3  -6   71.69    3.00
   6   3   6   72.69    4.00
   6   3   6   69.39    5.50
   7  -4  -6   19.60    2.40
   7  -4  -6   19.10    2.20
  -7  -4   6   19.60    2.00
   7  -4  -6   17.40    1.70
  -7  -4   6   20.20    1.70
   7   4  -6   13.00    2.70
   7   4  -6   20.70    2.80
  -7   4   6   19.50    2.20
   7   4  -6   22.30    2.60
   6  -4  -6   69.89    4.20
  -6  -4   6   65.49    4.10
  -6  -4   6   74.49    4.90
  -6  -4   6   69.49    4.10
  -6  -4   6   85.89    7.90
   6   4  -6   61.29    7.40
   6   4  -6   60.79    5.40
   6   4  -6   67.79    6.20
  -6   4   6   68.99    5.30
  -6   4   6   73.79    4.30
  -6   4   6   70.39    5.90
   6   4  -6   68.19    4.30
   6   4  -6   70.29    5.20
   5  -4  -6   24.70    3.00
  -5  -4   6   23.40    3.60
  -5  -4   6   26.70    3.10
   5  -4  -6   20.40    2.70
  -5  -4   6   26.50    3.40
  -5  -4   6   25.00    2.80
   5   4  -6   25.20    3.70
   5   4  -6   22.40    2.80
   5   4  -6   24.10    4.60
  -5   4   6   27.20    3.90
   5   4  -6   27.10    4.70
   5   4  -6   28.80    6.80
  -5   4   6   27.50    3.00
  -5   4   6   26.10    5.10
   5   4  -6   25.00    2.90
   4  -4  -6  595.64   21.00
  -4  -4   6  559.94   20.80
   4  -4  -6  565.84   21.70
  -4  -4   6  572.24   20.30
  -4  -4   6  578.04   21.40
  -4  -4   6  597.24   50.19
  -4  -4   6  584.84   22.10
   4  -4  -6  602.24   42.90
   4  -4  -6  572.64   21.90
   4   4  -6  593.84   20.30
  -4   4   6  573.84   24.10
   4   4  -6  570.24   21.50
   4   4  -6  592.04   19.80
   4   4  -6  637.54   36.40
   4   4  -6  593.24   20.80
   4   4  -6  593.24   23.40
   3  -4  -6  176.18    8.40
   3  -4  -6  169.88    8.70
   3  -4  -6  159.88    8.50
   3  -4  -6  160.98    6.90
   3  -4  -6  161.28   18.80
   3  -4  -6  161.88    7.40
  -3  -4   6  159.18    8.70
  -3  -4   6  157.58    8.90
   3   4  -6  157.68    7.20
  -3   4   6  172.08   10.30
   3   4  -6  157.58    7.70
   3   4  -6  169.88    9.50
  -3   4   6  173.58    7.70
   3   4  -6  169.38   18.10
  -3   4   6  167.88   10.20
   2  -4  -6 1793.22   53.79
  -2  -4   6 1780.12   55.09
   2  -4  -6 1642.64   51.49
   2  -4  -6 1730.63   63.09
   2  -4  -6 1743.83   53.09
   2  -4  -6 1634.34   51.99
  -2  -4   6 1804.82   54.59
  -2   4   6 1873.21   76.79
   2   4  -6 1731.83   52.29
   2   4  -6 1714.03   72.19
  -2   4   6 1789.82   56.39
   1  -4  -6  659.83   30.40
   1  -4  -6  703.63   24.00
  -1  -4   6  755.62   25.40
   1  -4  -6  730.23   23.60
  -1  -4   6  696.93   25.50
   1   4  -6  739.03   24.20
  -1   4   6  728.03   43.50
  -1   4   6  740.93   26.50
   0  -4  -6  378.76   14.40
   0  -4  -6  402.06   14.20
   0  -4   6  398.56   16.20
   0  -4   6  420.06   16.70
   0   4  -6  404.96   14.60
   0   4   6  349.57   30.80
   0   4   6  405.46   16.60
   0   4   6  416.46   22.10
   0   4  -6  411.16   15.40
  -1  -4  -6  359.76   13.60
   1  -4   6  413.96   17.40
   1  -4   6  368.56   15.50
   1  -4   6  359.96   15.80
  -1  -4  -6  357.66   13.20
   1   4   6  368.96   15.10
  -1   4  -6  371.06   15.00
   1   4   6  359.86   20.40
   1   4   6  355.16   15.60
   1   4   6  364.56   32.30
   2  -4   6 1968.30   59.99
  -2  -4  -6 1989.40   66.69
  -2  -4  -6 1964.40   57.69
   2  -4   6 1950.70   59.79
  -2  -4  -6 1953.20   58.19
   2  -4   6 1909.61   58.49
  -2  -4  -6 1767.22   56.09
   2   4   6 1916.81   60.89
  -2   4  -6 1915.51   58.39
   2   4   6 1849.11   62.79
   2   4   6 1898.81   60.99
   2   4   6 1948.21   59.69
   2   4   6 1803.12   90.79
   2   4   6 1979.60   69.09
   2   4   6 1926.21   58.29
  -2   4  -6 1876.61   60.09
  -3  -4  -6  347.57   12.40
   3  -4   6  355.66   13.30
  -3  -4  -6  395.16   14.40
  -3  -4  -6  360.76   20.20
  -3  -4  -6  358.76   14.00
   3  -4   6  371.66   15.50
   3   4   6  357.86   15.50
  -3   4  -6  367.96   14.40
   3   4   6  363.16   22.10
   3   4   6  331.07   34.50
   3   4   6  358.96   16.70
   3   4   6  350.76   15.90
  -3   4  -6  331.27   15.40
   3   4   6  352.76   17.80
  -4  -4  -6  620.94   20.20
  -4  -4  -6  645.94   21.60
   4  -4   6  652.03   22.90
  -4  -4  -6  634.64   22.10
   4   4   6  657.53   23.80
   4   4   6  649.74   25.90
   4   4   6  635.64   31.20
  -4   4  -6  658.93   22.20
   4   4   6  601.64   23.40
  -4   4  -6  600.14   23.60
   4   4   6  637.54   24.50
  -5  -4  -6   27.30    2.60
  -5  -4  -6   23.80    2.30
   5  -4   6   28.90    3.10
   5  -4   6   24.50    2.60
  -5  -4  -6   25.40    2.00
   5   4   6   27.70    3.20
  -5   4  -6   23.20    2.80
   5   4   6   28.30    4.40
  -5   4  -6   20.80    2.40
   5   4   6   26.30    3.10
   5   4   6   20.50    5.30
   6  -4   6   17.00    1.70
   6  -4   6   16.50    2.80
  -6  -4  -6   18.70    1.20
   6   4   6   13.60    1.70
   6   4   6   14.30    3.40
   7  -5  -6   26.10    2.60
   7  -5  -6   26.10    2.10
  -7  -5   6   23.60    1.60
   7  -5  -6   23.70    1.70
  -7  -5   6   20.90    1.80
  -7   5   6   24.90    2.10
   7   5  -6   18.30    3.40
   7   5  -6   21.10    2.70
  -6  -5   6   13.80    2.00
  -6  -5   6   13.20    1.90
  -6  -5   6   11.60    2.20
   6  -5  -6   10.50    1.90
  -6  -5   6   13.80    2.50
  -6   5   6   15.50    2.70
   6   5  -6   12.50    2.20
   6   5  -6   11.90    2.50
   6   5  -6   12.70    2.70
  -6   5   6   14.50    3.90
   6   5  -6   14.90    3.50
   6   5  -6   13.50    4.40
   5  -5  -6   60.19    4.40
   5  -5  -6   68.09    5.40
  -5  -5   6   57.89    4.00
  -5  -5   6   61.19    5.00
  -5  -5   6   57.39    4.70
  -5  -5   6   58.59    4.10
  -5   5   6   63.29    4.40
   5   5  -6   58.19    6.40
  -5   5   6   55.09    5.80
   5   5  -6   54.09    4.70
   5   5  -6   58.59    5.50
   5   5  -6   53.79    7.50
  -5   5   6   63.69    5.90
  -4  -5   6  466.65   17.60
   4  -5  -6  509.35   19.70
   4  -5  -6  480.95   19.30
   4  -5  -6  490.85   16.90
  -4  -5   6  534.15   20.30
   4  -5  -6  494.15   39.70
  -4  -5   6  485.35   19.50
   4  -5  -6  504.65   17.80
  -4  -5   6  476.35   45.20
  -4  -5   6  500.05   18.20
   4   5  -6  531.05   25.30
   4   5  -6  481.25   16.40
  -4   5   6  493.15   17.20
   4   5  -6  491.25   17.80
   4   5  -6  488.65   17.90
   4   5  -6  483.05   20.70
  -4   5   6  520.05   20.10
   4   5  -6  488.95   18.20
  -4   5   6  445.16   20.60
   3  -5  -6  218.78   23.40
  -3  -5   6  211.88    9.70
   3  -5  -6  216.08    9.30
  -3  -5   6  201.98    9.90
  -3  -5   6  215.18   10.90
   3  -5  -6  221.68   10.20
   3  -5  -6  218.18   10.70
   3  -5  -6  220.68    8.80
  -3  -5   6  217.08   10.60
   3   5  -6  226.18    9.50
  -3   5   6  226.28   11.80
   3   5  -6  224.48   11.50
   3   5  -6  242.88   14.80
   3   5  -6  230.28   23.00
   3   5  -6  232.28   10.00
  -3   5   6  209.88   11.80
   3   5  -6  222.08    8.70
  -3   5   6  217.18    9.00
   2  -5  -6 1194.38   36.70
   2  -5  -6 1153.78   36.10
  -2  -5   6 1166.88   38.00
  -2  -5   6 1161.78   38.30
  -2  -5   6 1187.18   39.10
   2  -5  -6 1193.98   37.80
   2   5  -6 1211.08   36.70
   2   5  -6 1210.98   59.19
   2   5  -6 1172.88   37.60
  -2   5   6 1211.38   40.80
  -2   5   6 1251.77   40.50
  -2   5   6 1213.08   38.80
   1  -5  -6  902.31   37.30
  -1  -5   6  903.91   30.40
   1  -5  -6  880.31   28.70
   1  -5  -6  830.32   26.70
  -1  -5   6  891.11   30.60
  -1  -5   6  834.92   29.30
  -1  -5   6  838.12   28.90
   1  -5  -6  818.72   27.20
   1  -5  -6  936.01   28.80
  -1   5   6  879.91   30.00
  -1   5   6  846.82   51.09
   1   5  -6  867.01   28.50
  -1   5   6  880.81   35.40
   1   5  -6  899.91   28.40
  -1   5   6  870.11   30.20
   0  -5   6  395.66   16.50
   0  -5  -6  369.06   14.30
   0  -5   6  393.56   16.30
   0   5  -6  366.16   13.80
   0   5  -6  367.16   14.30
   0   5   6  422.16   34.50
   0   5   6  370.96   17.90
   0   5  -6  402.26   15.00
   0   5   6  366.26   15.80
   0   5   6  402.16   25.50
   0   5   6  386.16   16.20
   0   5   6  391.06   15.10
   0   5   6  390.76   23.10
  -1  -5  -6  156.48    7.50
   1  -5   6  155.98    8.70
   1  -5   6  165.68    9.50
  -1  -5  -6  162.88    7.40
   1  -5   6  164.98    8.50
   1  -5   6  171.48    9.70
  -1  -5  -6  159.18    6.70
   1   5   6  173.48   21.40
  -1   5  -6  162.18    7.70
   1   5   6  168.78   10.00
   1   5   6  142.79   10.50
   1   5   6  173.68    8.70
   1   5   6  173.38    9.70
  -1   5  -6  169.88    8.70
   1   5   6  166.88    9.60
   1   5   6  159.28    7.10
   1   5   6  148.99   12.60
  -1   5  -6  157.68    7.80
  -2  -5  -6   44.10    3.10
  -2  -5  -6   46.60    3.60
   2  -5   6   42.80    4.90
   2  -5   6   42.40    4.90
   2  -5   6   45.10    5.50
  -2  -5  -6   50.39    3.80
   2   5   6   57.19    6.30
   2   5   6   45.10    5.00
  -2   5  -6   45.50    4.50
  -2   5  -6   33.40    4.80
   2   5   6   44.00    6.00
   2   5   6   40.30    7.30
  -2   5  -6   43.80    3.80
   2   5   6   50.79    8.30
   2   5   6   27.00   13.20
   2   5   6   51.39    4.90
   3  -5   6  190.78    8.80
  -3  -5  -6  180.98    7.50
   3  -5   6  193.58    9.50
   3  -5   6  205.48   10.40
  -3  -5  -6  191.98    8.60
   3   5   6  192.18   15.70
   3   5   6  209.88   11.20
   3   5   6  199.48   12.70
  -3   5  -6  191.28   10.30
  -3   5  -6  192.88    9.20
   3   5   6  197.98   11.40
   3   5   6  207.58   10.60
  -4  -5  -6  233.28   10.00
   4  -5   6  255.47   11.10
  -4  -5  -6  246.98   11.30
  -4  -5  -6  236.58    8.50
  -4   5  -6  233.08   10.10
   4   5   6  222.18   10.80
  -4   5  -6  237.68   11.40
   4   5   6  239.18   11.40
   4   5   6  207.28   11.50
   4   5   6  219.88   16.00
   4   5   6  225.98   13.10
  -5  -5  -6   24.30    2.20
  -5  -5  -6   23.30    2.20
   5  -5   6   23.20    2.50
  -5  -5  -6   25.00    1.80
   5   5   6   26.20    2.80
   5   5   6   26.00    2.80
  -5   5  -6   23.10    2.30
   5   5   6   17.70    4.10
  -5   5  -6   19.70    2.50
   5   5   6   26.00    4.00
   7   6  -6   44.40    3.40
  -7   6   6   45.80    2.50
   7   6  -6   49.20    3.70
  -6  -6   6    3.60    1.00
  -6  -6   6    0.20    1.30
   6  -6  -6    2.90    1.10
  -6   6   6    1.90    1.30
  -6   6   6    2.40    1.40
   6   6  -6    3.90    2.00
   6   6  -6    1.50    1.50
   6   6  -6    3.00    1.20
   6   6  -6    2.50    2.20
   5  -6  -6  192.68    8.60
  -5  -6   6  175.58   10.50
  -5  -6   6  182.68    7.80
  -5  -6   6  187.08    9.20
   5  -6  -6  187.58    7.90
   5   6  -6  172.18   10.70
   5   6  -6  185.28    8.50
  -5   6   6  186.58    9.40
   5   6  -6  185.78    9.10
   5   6  -6  170.18    8.30
   5   6  -6  185.58   14.00
  -5   6   6  180.58   10.00
  -4  -6   6  173.18    8.20
   4  -6  -6  189.08   10.10
  -4  -6   6  194.18   10.00
  -4  -6   6  170.58    9.10
   4  -6  -6  176.28    8.40
   4  -6  -6  182.38    7.90
   4  -6  -6  182.68    9.30
   4   6  -6  180.28    8.90
   4   6  -6  175.38   13.70
  -4   6   6  179.28   10.30
  -4   6   6  183.58    7.30
   4   6  -6  177.88    8.60
   4   6  -6  174.78    8.50
   4   6  -6  179.28   10.90
  -4   6   6  178.48    9.70
   3  -6  -6 1095.39   37.00
   3  -6  -6 1108.29   60.99
   3  -6  -6 1146.69   36.50
  -3  -6   6 1125.19   36.60
   3  -6  -6 1113.39   34.80
   3  -6  -6 1075.29   34.00
  -3  -6   6 1015.50   39.80
  -3  -6   6 1144.99   37.30
  -3  -6   6 1041.40   35.60
  -3   6   6 1082.29   37.80
  -3   6   6 1110.59   38.70
   3   6  -6 1106.69   38.30
   3   6  -6 1177.28   35.90
   3   6  -6 1000.90   37.40
   3   6  -6  997.40   57.49
  -3   6   6 1109.79   36.90
   3   6  -6 1118.99   35.00
   3   6  -6 1140.79   43.00
  -2  -6   6  198.98   10.40
  -2  -6   6  190.68   10.00
   2  -6  -6  175.08    8.20
   2  -6  -6  186.48    7.80
   2  -6  -6  204.28    9.30
  -2  -6   6  175.68    9.10
  -2  -6   6  187.08    9.10
   2  -6  -6  196.28    9.70
   2   6  -6  194.28   20.60
  -2   6   6  193.38    9.70
  -2   6   6  191.18   11.20
   2   6  -6  194.38    9.00
   2   6  -6  191.08    7.70
  -1  -6   6  971.90   32.80
   1  -6  -6  971.70   30.70
  -1  -6   6  945.31   32.40
  -1  -6   6 1019.20   34.30
   1  -6  -6  950.90   31.50
   1  -6  -6  967.20   30.10
   1  -6  -6  943.31   41.10
   1  -6  -6  999.80   32.30
  -1  -6   6 1003.00   33.80
  -1   6   6  992.10   32.40
   1   6  -6  925.81   30.50
  -1   6   6 1034.90   50.19
  -1   6   6 1046.70   34.00
  -1   6   6 1002.00   35.50
   1   6  -6  970.70   32.00
  -1   6   6  987.50   39.50
   0  -6   6  477.25   19.50
   0  -6  -6  478.95   16.90
   0  -6  -6  483.85   17.50
   0  -6   6  485.75   19.80
   0  -6  -6  461.35   15.80
   0  -6  -6  462.65   16.20
   0  -6   6  460.75   18.20
   0  -6  -6  493.25   25.70
   0  -6   6  458.35   18.50
   0   6   6  490.95   19.60
   0   6   6  495.35   25.10
   0   6   6  476.35   38.80
   0   6   6  487.15   19.20
   0   6  -6  483.85   16.80
   0   6   6  506.85   16.10
   0   6   6  473.65   21.80
   0   6   6  495.05   20.90
   0   6  -6  499.35   17.70
   0   6  -6  488.75   17.70
  -1  -6  -6  109.09    6.10
   1  -6   6  124.59    8.20
  -1  -6  -6  108.99    6.20
  -1  -6  -6  105.69    5.80
   1  -6   6  115.59    7.50
   1  -6   6  118.29    7.30
   1  -6   6  112.69    8.10
   1   6   6   87.09   19.10
  -1   6  -6  107.49    6.10
   1   6   6  110.39    8.40
  -1   6  -6  110.49    6.70
   1   6   6  119.09    8.00
  -1   6  -6  115.99    6.50
   1   6   6  114.29   11.40
   1   6   6  112.49    7.90
   1   6   6  124.39   10.20
  -2  -6  -6  548.55   19.30
  -2  -6  -6  613.04   21.10
   2  -6   6  608.64   22.90
   2  -6   6  605.24   24.20
  -2  -6  -6  585.14   20.80
   2  -6   6  609.44   22.20
   2  -6   6  630.84   23.70
  -2   6  -6  587.64   22.50
   2   6   6  601.24   23.70
   2   6   6  641.74   26.30
  -2   6  -6  608.64   21.30
   2   6   6  658.43   31.50
   2   6   6  625.04   24.00
   2   6   6  635.64   23.00
   2   6   6  607.64   46.80
   2   6   6  634.14   24.40
  -2   6  -6  621.04   21.50
  -3  -6  -6  606.04   19.90
   3  -6   6  563.04   21.40
   3  -6   6  555.54   19.60
   3  -6   6  557.04   20.60
  -3  -6  -6  576.84   19.10
  -3  -6  -6  522.45   17.70
   3   6   6  577.44   21.50
   3   6   6  570.04   22.00
   3   6   6  563.14   28.70
   3   6   6  554.64   22.70
  -3   6  -6  561.44   19.90
   3   6   6  540.15   23.90
  -3   6  -6  538.95   21.80
  -3   6  -6  544.05   23.50
  -4  -6  -6   61.49    3.70
   4  -6   6   56.89    4.70
  -4  -6  -6   61.59    4.00
   4   6   6   71.29    7.00
   4   6   6   54.89    5.10
  -4   6  -6   60.09    4.10
   4   6   6   55.39    4.70
  -4   6  -6   60.79    4.70
   4   6   6   60.89    4.50
   4   6   6   63.59    7.80
  -4   6  -6   60.99    4.00
   5  -6   6   30.50    2.60
  -5  -6  -6   25.40    2.00
   5  -6   6   25.80    2.10
  -5  -6  -6   26.70    1.60
   5   6   6   27.90    4.10
  -5   6  -6   22.50    2.30
   5   6   6   23.20    3.70
  -5   6  -6   27.10    2.20
  -6  -7   6    9.20    1.60
   6  -7  -6   11.50    1.80
  -6  -7   6    9.60    1.30
  -6   7   6    8.90    1.60
   6   7  -6    8.00    1.40
   6   7  -6    7.00    2.10
   6   7  -6   11.90    2.10
   6   7  -6    9.10    3.00
  -6   7   6    6.60    2.00
  -5  -7   6    6.60    1.90
   5  -7  -6   10.20    2.30
  -5  -7   6    5.10    1.60
  -5  -7   6    8.00    1.50
   5  -7  -6    8.80    1.90
   5  -7  -6    6.00    3.50
   5   7  -6    8.80    1.90
   5   7  -6    8.10    2.10
  -5   7   6    5.30    1.80
   5   7  -6    9.50    2.70
   5   7  -6    6.90    1.70
  -5   7   6    7.90    2.10
   5   7  -6    8.30    3.60
  -4  -7   6  183.38    9.10
   4  -7  -6  184.68   10.00
   4  -7  -6  162.98    9.00
  -4  -7   6  172.78    8.00
  -4  -7   6  170.08    9.20
  -4   7   6  166.78    9.30
   4   7  -6  207.08   17.90
   4   7  -6  174.88   10.60
   4   7  -6  167.58    9.70
   4   7  -6  171.58    8.80
   4   7  -6  203.68   10.20
  -4   7   6  201.88   13.80
   3  -7  -6  575.14   21.90
   3  -7  -6  603.04   21.40
  -3  -7   6  561.44   21.00
   3  -7  -6  561.34   19.00
   3  -7  -6  581.84   19.70
  -3  -7   6  587.14   21.90
  -3  -7   6  547.05   19.90
  -3   7   6  551.14   21.10
   3   7  -6  565.54   26.80
   3   7  -6  583.34   28.60
  -3   7   6  565.24   22.40
   3   7  -6  527.45   19.70
   3   7  -6  563.84   19.90
  -3   7   6  563.84   20.90
   3   7  -6  542.05   20.20
  -2  -7   6  419.96   17.30
  -2  -7   6  388.56   16.40
   2  -7  -6  401.56   14.00
  -2  -7   6  320.57   16.90
   2  -7  -6  419.96   33.40
  -2  -7   6  398.86   15.90
   2  -7  -6  393.76   17.80
   2  -7  -6  397.46   14.50
   2   7  -6  410.46   15.50
  -2   7   6  386.76   15.60
  -2   7   6  411.86   15.50
  -2   7   6  345.67   41.40
  -2   7   6  413.96   16.30
   2   7  -6  398.46   37.00
   2   7  -6  416.16   20.80
   2   7  -6  391.46   13.10
  -2   7   6  409.56   18.10
   1  -7  -6  515.85   18.80
   1  -7  -6  507.05   17.60
   1  -7  -6  511.55   17.80
  -1  -7   6  544.35   20.80
   1  -7  -6  524.55   19.30
   1  -7  -6  504.05   27.00
  -1  -7   6  525.95   19.80
  -1  -7   6  510.85   20.90
  -1  -7   6  486.75   19.60
   1   7  -6  530.85   19.20
  -1   7   6  547.25   21.10
  -1   7   6  536.85   17.20
  -1   7   6  520.25   29.70
  -1   7   6  533.65   22.30
  -1   7   6  557.04   35.90
   1   7  -6  507.25   38.80
   0  -7  -6  555.94   19.50
   0  -7  -6  530.85   18.70
   0  -7  -6  565.94   28.00
   0  -7  -6  510.15   17.50
   0  -7   6  512.15   20.50
   0  -7   6  560.64   22.00
   0  -7  -6  517.35   18.70
   0  -7   6  539.45   21.50
   0   7  -6  557.14   19.60
   0   7  -6  534.95   18.50
   0   7  -6  541.05   18.20
   0   7   6  486.55   21.50
   0   7   6  557.84   21.50
   0   7   6  516.15   17.70
   0   7   6  555.54   22.90
   0   7   6  535.95   27.00
   1  -7   6  510.25   20.30
   1  -7   6  538.95   21.60
  -1  -7  -6  543.95   18.90
   1  -7   6  529.75   21.90
  -1  -7  -6  555.84   28.00
  -1  -7  -6  519.15   18.90
   1  -7   6  516.95   20.00
   1   7   6  541.85   21.50
  -1   7  -6  536.65   19.40
   1   7   6  520.95   23.70
   1   7   6  525.15   27.60
  -1   7  -6  526.65   19.20
   1   7   6  527.65   21.50
   1   7   6  548.75   22.30
  -1   7  -6  507.55   18.30
  -2  -7  -6  574.04   19.50
   2  -7   6  570.34   21.40
   2  -7   6  534.05   22.40
  -2  -7  -6  543.45   19.00
   2  -7   6  554.74   20.70
   2  -7   6  557.24   22.00
  -2   7  -6  565.94   20.50
  -2   7  -6  565.84   19.90
  -2   7  -6  561.04   19.50
   2   7   6  553.34   22.10
   2   7   6  569.04   24.40
   2   7   6  527.15   22.20
   2   7   6  565.14   22.20
   2   7   6  558.54   28.80
   3  -7   6  111.39    8.00
   3  -7   6  104.49    7.00
   3  -7   6  113.29    6.20
  -3  -7  -6  108.49    5.70
  -3  -7  -6  101.29    4.70
  -3  -7  -6  106.89    5.40
   3  -7   6  103.29    6.60
   3   7   6  106.79    7.60
   3   7   6  107.19    7.10
   3   7   6  120.59    9.50
  -3   7  -6  113.39    6.60
  -3   7  -6   99.19    5.80
  -3   7  -6  109.79    6.00
   3   7   6   99.79   10.50
  -4  -7  -6   89.09    4.40
  -4  -7  -6   77.89    3.70
   4   7   6   85.49    5.00
   4   7   6  123.59   11.20
  -4   7  -6   92.59    4.60
  -4   7  -6  107.79    6.00
  -4   7  -6   92.29    5.40
   4   7   6   76.19    6.70
   5  -7   6   13.90    1.50
   5   7   6   13.50    2.80
  -5   7  -6   17.40    1.50
   5   7   6   11.00    2.50
   6  -8  -6  137.99    5.30
   6   8  -6  120.59    5.10
  -6   8   6  136.59    5.10
  -5  -8   6  120.79    6.10
   5  -8  -6  140.39    6.20
  -5  -8   6  125.79    5.70
  -5  -8   6  135.29    6.20
   5  -8  -6  127.89    5.70
   5   8  -6  119.49    7.30
   5   8  -6  132.89    6.50
   5   8  -6  111.39    9.70
   5   8  -6  126.79    6.10
   5   8  -6  131.09    6.10
  -5   8   6  137.19    6.40
  -5   8   6  130.99    6.60
   4  -8  -6  175.68    9.70
   4  -8  -6  195.98    8.20
  -4  -8   6  193.98    8.80
   4  -8  -6  199.98    9.50
  -4  -8   6  188.78    8.80
   4  -8  -6  202.18    8.60
   4   8  -6  183.08    8.60
  -4   8   6  187.88    8.60
   4   8  -6  180.98   13.30
   4   8  -6  167.88   11.40
   4   8  -6  181.28    8.60
   4   8  -6  199.88    8.70
  -4   8   6  201.68    9.00
  -3  -8   6   16.60    3.30
   3  -8  -6   10.80    2.80
  -3  -8   6   13.60    2.60
  -3  -8   6   15.40    3.00
   3  -8  -6   11.00    2.70
  -3   8   6   17.60    2.60
   3   8  -6   10.90    3.20
   3   8  -6   13.90    6.60
   3   8  -6   20.20    3.50
   3   8  -6   16.30    3.40
  -3   8   6   16.50    3.40
   2  -8  -6  381.46   14.10
   2  -8  -6  405.06   15.70
  -2  -8   6  391.96   16.70
   2  -8  -6  389.06   13.80
   2  -8  -6  397.06   16.20
  -2  -8   6  379.16   15.90
  -2  -8   6  376.16   15.00
   2   8  -6  391.46   20.10
  -2   8   6  369.26   14.20
   2   8  -6  374.46   15.10
  -2   8   6  383.26   17.50
   1  -8  -6   87.19    5.90
   1  -8  -6   83.19    4.40
  -1  -8   6   80.19    5.70
  -1  -8   6   67.59    5.50
  -1  -8   6   88.49    6.60
   1  -8  -6   77.29    4.50
   1  -8  -6   82.99    5.30
  -1  -8   6   78.89    6.50
   1   8  -6   79.79    7.60
  -1   8   6   79.79    4.30
   1   8  -6   80.19    5.50
  -1   8   6   80.79    7.10
   1   8  -6   80.59    3.80
  -1   8   6   77.59    6.20
   0  -8  -6  747.43   24.30
   0  -8  -6  757.62   25.70
   0  -8   6  772.82   27.10
   0  -8   6  756.92   28.50
   0  -8   6  776.72   27.20
   0   8   6  818.52   35.40
   0   8  -6  806.92   30.30
   0   8   6  766.42   29.80
   0   8  -6  795.42   26.70
   0   8   6  779.52   28.40
   0   8  -6  772.62   24.60
  -1  -8  -6  498.65   17.90
   1  -8   6  533.15   21.60
   1  -8   6  508.35   19.50
  -1  -8  -6  525.75   18.50
   1  -8   6  499.55   20.90
   1   8   6  524.95   21.00
   1   8   6  563.94   23.60
   1   8   6  478.85   26.00
   1   8   6  507.85   21.50
  -1   8  -6  525.85   18.90
  -1   8  -6  494.95   17.40
   1   8   6  522.15   20.90
   2  -8   6    1.10    1.60
   2  -8   6    0.70    1.80
   2  -8   6    1.10    1.60
   2  -8   6    1.50    1.90
  -2  -8  -6    1.30    0.90
  -2  -8  -6    1.70    1.20
  -2   8  -6    1.40    1.10
   2   8   6    2.00    1.40
  -2   8  -6    0.30    1.00
  -2   8  -6    1.30    1.00
   2   8   6    1.00    2.70
   2   8   6    1.60    1.90
   2   8   6    6.00    4.40
   2   8   6    2.10    1.50
   3  -8   6  111.19    6.70
   3  -8   6  107.89    5.70
   3  -8   6  103.09    6.10
  -3  -8  -6   83.59    5.00
  -3  -8  -6   98.89    5.00
   3   8   6  125.49    9.50
   3   8   6  114.99   10.20
  -3   8  -6  105.59    5.70
  -3   8  -6  105.79    5.50
  -3   8  -6  109.39    5.40
   3   8   6  103.39    6.40
   4  -8   6   24.60    2.70
   4   8   6   20.50    4.00
  -4   8  -6   22.30    1.80
  -4   8  -6   24.70    2.10
   5  -9  -6   61.29    3.50
   5   9  -6   61.49    6.10
   5   9  -6   56.89    3.40
  -4  -9   6  527.65   17.50
  -4  -9   6  599.64   21.60
  -4  -9   6  526.05   18.30
   4  -9  -6  566.44   18.10
   4  -9  -6  533.45   19.30
   4   9  -6  532.55   18.50
  -4   9   6  555.64   17.90
   4   9  -6  532.65   18.40
   4   9  -6  527.45   24.80
   3  -9  -6   54.89    3.60
  -3  -9   6   51.59    4.20
  -3  -9   6   46.50    4.50
   3  -9  -6   43.50    3.50
   3  -9  -6   57.39    6.40
   3  -9  -6   55.79    4.50
  -3   9   6   49.70    4.50
   3   9  -6   46.00    3.80
   3   9  -6   48.90    3.70
  -3   9   6   48.70    3.30
   3   9  -6   40.40    6.00
  -2  -9   6   73.59    5.90
   2  -9  -6   74.99    5.40
   2  -9  -6   77.89    4.60
   2  -9  -6   70.89    4.30
   2  -9  -6   71.89    5.60
  -2  -9   6   75.79    5.80
  -2  -9   6   74.89    5.10
   2   9  -6   76.29    4.80
  -2   9   6   77.09    3.70
   2   9  -6   72.59    7.70
   2   9  -6   74.69    5.10
  -2   9   6   75.39    6.40
  -1  -9   6  559.44   21.90
  -1  -9   6  546.65   19.80
   1  -9  -6  590.54   20.30
  -1  -9   6  579.54   21.70
   1  -9  -6  548.45   18.60
   1  -9  -6  562.74   18.40
  -1  -9   6  556.74   20.20
   1   9  -6  549.54   23.90
   1   9  -6  566.84   20.20
  -1   9   6  544.45   23.00
   0  -9   6   17.90    3.70
   0  -9  -6   19.90    2.10
   0  -9   6   22.80    3.50
   0  -9   6   16.30    3.00
   0  -9  -6   22.60    2.80
   0  -9   6   22.10    3.90
   0  -9  -6   24.00    3.40
   0   9   6   20.80    6.00
   0   9  -6   21.20    1.60
   0   9   6   23.70    4.70
   0   9   6   16.10    3.30
   0   9  -6   19.70    2.70
  -1  -9  -6   69.49    4.10
   1  -9   6   67.79    5.30
  -1  -9  -6   80.69    5.30
   1  -9   6   72.89    5.70
   1  -9   6   74.19    6.20
   1  -9   6   79.69    6.40
  -1  -9  -6   72.19    4.50
   1   9   6   84.89    9.50
   1   9   6   71.99    5.90
  -1   9  -6   77.59    3.90
   1   9   6   77.89    6.50
  -1   9  -6   73.19    5.00
   2  -9   6  233.78   11.60
   2  -9   6  232.58   10.20
  -2  -9  -6  209.68    8.70
   2  -9   6  229.48   11.00
   2  -9   6  227.58   10.40
  -2  -9  -6  196.38    8.90
  -2   9  -6  236.28    8.60
   2   9   6  233.78   15.20
   2   9   6  233.98   11.70
   2   9   6  216.38   10.60
  -2   9  -6  243.88    9.70
   3  -9   6   62.49    3.70
   3  -9   6   58.69    4.40
   3  -9   6   64.59    4.50
   3   9   6   61.69    6.80
   3   9   6   59.39    4.10
  -3   9  -6   52.89    3.40
  -3   9  -6   61.19    3.20
   4   9   6  127.69    7.50
  -4   9  -6  158.88    5.00
   5  10  -6   11.70    1.20
   4 -10  -6  105.69    5.00
   4 -10  -6  106.99    4.80
   4 -10  -6   93.39    5.30
   4  10  -6   95.39    7.20
   4  10  -6  103.59    4.80
   4  10  -6  103.99    4.90
   3 -10  -6  111.39    6.30
  -3 -10   6  114.49    5.90
   3 -10  -6  114.59    6.90
   3 -10  -6  121.69    5.60
   3 -10  -6  120.19    5.80
  -3 -10   6  112.89    6.10
   3  10  -6   93.09    6.10
   3  10  -6  109.29    8.50
  -3  10   6  112.99    6.30
   3  10  -6  120.79    5.80
   2 -10  -6   38.50    3.00
   2 -10  -6   40.20    3.80
  -2 -10   6   43.30    3.50
   2 -10  -6   40.50    3.50
  -2 -10   6   40.50    3.90
   2 -10  -6   47.70    3.10
  -2 -10   6   36.60    3.80
  -2  10   6   45.80    4.50
   2  10  -6   44.40    3.50
   2  10  -6   40.20    3.20
   2  10  -6   38.30    4.90
   1 -10  -6  159.28    6.60
  -1 -10   6  164.48    9.00
  -1 -10   6  168.48    8.70
   1 -10  -6  155.98    7.80
   1 -10  -6  171.58    8.40
  -1 -10   6  160.88    7.80
  -1  10   6  157.78    9.40
   1  10  -6  148.69    7.00
   1  10  -6  163.58    7.70
   0 -10  -6   -0.70    0.90
   0 -10   6    1.40    1.30
   0 -10  -6    1.00    0.70
   0 -10   6    0.70    1.30
   0 -10   6   -1.50    1.10
   0 -10  -6    1.50    1.10
   0 -10   6   -1.50    1.20
   0  10   6    0.30    1.30
   0  10  -6    0.90    1.00
   1 -10   6   48.40    4.60
   1 -10   6   51.29    4.00
  -1 -10  -6   45.00    3.40
   1 -10   6   47.70    4.30
   1 -10   6   51.59    4.30
  -1 -10  -6   46.30    3.40
  -1  10  -6   50.59    3.70
   1  10   6   52.09    4.70
   2 -10   6   23.10    2.70
   2 -10   6   23.50    2.80
   2 -10   6   25.40    3.10
  -2  10  -6   19.10    2.00
   2  10   6   19.70    2.90
   3 -10   6    9.50    1.20
   3 -10   6   10.90    1.80
  -3  10  -6    9.20    1.10
   4  11  -6    6.20    1.20
   3 -11  -6  230.68    7.90
   3 -11  -6  174.88    7.80
   3 -11  -6  218.98    8.70
   3  11  -6  184.18    7.80
   3  11  -6  232.58    7.90
   2 -11  -6   41.50    3.50
  -2 -11   6   40.30    3.20
   2 -11  -6   39.20    2.80
  -2 -11   6   41.40    2.90
   2  11  -6   43.00    2.90
  -2  11   6   37.10    3.70
   2  11  -6   36.10    2.90
  -1 -11   6  182.18    8.40
   1 -11  -6  182.58    8.30
  -1 -11   6  184.38    7.70
   1 -11  -6  191.18    7.90
  -1 -11   6  177.48    8.60
   1 -11  -6  183.18    6.90
   1  11  -6  175.08    7.10
   1  11  -6  182.68    7.70
  -1  11   6  185.68    9.10
   0 -11   6   33.20    3.40
   0 -11  -6   27.90    2.50
   0 -11   6   26.70    2.90
   0 -11   6   26.90    2.80
   0 -11  -6   26.60    2.00
   0  11  -6   26.60    2.00
   0  11   6   23.90    3.20
   0  11  -6   22.20    2.30
   1 -11   6   60.79    3.90
   1 -11   6   64.19    3.50
   1  11   6   65.09    4.50
  -1  11  -6   59.19    3.50
  -1  11  -6   58.99    2.90
   2 -11   6   23.40    2.00
  -2  11  -6   16.60    1.50
  -2  12   6  100.69    5.10
   2  12  -6  129.69    4.70
   1 -12  -6   20.50    2.00
  -1  12   6   24.40    3.00
   1  12  -6   30.80    2.00
   0 -12   6  109.79    4.40
   0  12  -6   92.69    4.10
   0  12   6  100.99    5.30
  -1  12  -6  105.89    4.00
  -7   0   7    0.50    0.60
  -7   0   7    0.80    1.30
   7   0  -7    2.30    2.10
   7   0  -7    3.10    1.30
   7   0  -7    0.40    1.70
   6   0  -7   51.59    4.10
  -6   0   7   55.89    3.40
  -6   0   7   59.69    5.80
  -6   0   7   37.60    5.00
  -6   0   7   53.69    3.90
   6   0  -7   59.49    5.40
  -6   0   7   56.29    4.30
   5   0  -7  388.76   15.50
  -5   0   7  392.46   13.80
  -5   0   7  366.46   14.80
  -5   0   7  387.66   18.40
   5   0  -7  366.86   18.70
  -5   0   7  379.86   15.90
  -5   0   7  399.36   15.20
  -5   0   7  360.56   16.20
  -4   0   7 2884.21   87.59
  -4   0   7 2988.70   87.39
   4   0  -7 2809.62   85.49
  -4   0   7 2942.11  135.99
  -4   0   7 2877.11  100.69
  -4   0   7 2974.50   88.59
  -4   0   7 2988.80   85.99
   4   0  -7 3006.30   92.49
  -4   0   7 2850.71   92.59
  -3   0   7  507.75   18.90
  -3   0   7  517.35   22.40
  -3   0   7  511.65   17.50
  -3   0   7  541.55   42.90
  -3   0   7  505.35   19.40
  -3   0   7  541.95   18.80
   3   0  -7  505.35   18.30
  -2   0   7 2696.23  111.69
  -2   0   7 3140.79   87.39
  -2   0   7 2679.73   83.69
  -2   0   7 2764.82   87.89
  -2   0   7 2758.12   82.89
   2   0  -7 2732.13   82.79
   1   0  -7   15.20    2.60
   1   0  -7   11.90    2.20
   1   0  -7   20.10    5.00
  -1   0   7   13.40    2.30
  -1   0   7   11.90    2.70
   0   0  -7   27.10    3.10
   0   0  -7   30.00    3.00
   0   0  -7   27.90    2.80
   0   0   7   36.50    3.60
  -1   0  -7   38.80    3.80
  -1   0  -7   33.20    3.70
  -1   0  -7   31.10    5.50
  -1   0  -7   41.40    3.40
   1   0   7   27.70    3.70
  -1   0  -7   32.90    2.50
   2   0   7   13.10    2.60
  -2   0  -7   11.50    1.80
  -2   0  -7    8.60    2.50
  -2   0  -7   16.50    3.30
  -2   0  -7    9.50    2.10
   2   0   7   14.40    2.50
  -2   0  -7    8.90    2.00
  -3   0  -7    3.70    1.20
   3   0   7    3.90    2.10
  -3   0  -7   -6.00    4.30
  -3   0  -7    3.20    1.60
  -3   0  -7    2.00    1.20
  -3   0  -7    2.10    1.20
  -4   0  -7   88.49    5.10
   4   0   7   86.39    9.60
   4   0   7   89.99    6.20
  -4   0  -7   88.29    4.60
  -4   0  -7   83.99    5.40
  -4   0  -7   86.49    6.20
   5   0   7    3.30    1.40
   5   0   7    0.30    1.50
  -5   0  -7    0.40    0.90
   5   0   7    1.10    1.40
   5   0   7    0.00    2.50
   6   0   7   44.70    3.30
   6   0   7   37.20    3.90
  -7  -1   7   15.90    1.90
  -7  -1   7   21.10    1.80
   7  -1  -7   12.80    1.80
   7  -1  -7   20.20    3.30
  -7  -1   7   19.70    2.20
   7  -1  -7   24.10    2.90
   7   1  -7   19.60    3.90
  -7   1   7   21.60    2.30
   7   1  -7   14.70    2.80
   7   1  -7   23.20    2.70
  -6  -1   7   92.99    5.50
  -6  -1   7   92.19    6.30
  -6  -1   7   95.69    4.90
   6  -1  -7  102.59    5.50
  -6  -1   7  101.39    5.80
  -6   1   7   88.49    4.90
  -6   1   7   92.09    6.20
   6   1  -7  102.49    5.90
  -6   1   7   95.29    5.70
  -6   1   7   89.59    7.10
   6   1  -7  105.79    9.80
  -6   1   7   94.49    4.40
   6   1  -7   87.89    6.90
  -5  -1   7   49.10    3.70
  -5  -1   7   55.99    5.80
  -5  -1   7   42.60    4.10
   5  -1  -7   44.30    4.30
  -5  -1   7   45.60    4.20
  -5  -1   7   48.30    5.10
   5  -1  -7   44.10    3.40
  -5   1   7   46.50    3.40
   5   1  -7   43.20    5.90
   5   1  -7   49.20    4.30
  -5   1   7   42.60    5.20
  -5   1   7   43.00    4.10
  -5   1   7   44.40    3.90
  -5   1   7   38.10    4.70
  -4  -1   7  510.05   46.30
  -4  -1   7  506.15   18.70
  -4  -1   7  483.35   17.10
   4  -1  -7  476.85   16.80
  -4  -1   7  497.35   19.30
   4  -1  -7  487.25   18.40
  -4  -1   7  492.45   21.80
  -4  -1   7  507.95   18.70
   4   1  -7  490.65   18.00
  -4   1   7  494.25   17.80
   4   1  -7  478.95   22.20
  -4   1   7  470.75   18.10
  -4   1   7  486.85   18.70
  -4   1   7  491.05   16.70
   4   1  -7  477.85   16.30
  -4   1   7  474.15   21.80
  -4   1   7  497.55   28.40
  -3  -1   7 1659.13   50.49
   3  -1  -7 1657.63   49.10
  -3  -1   7 1796.62   56.79
  -3  -1   7 1704.53   86.29
   3  -1  -7 1596.74   51.19
  -3  -1   7 1658.73   52.79
  -3  -1   7 1688.03   51.89
   3  -1  -7 1660.03   50.49
   3  -1  -7 1739.13   67.79
   3  -1  -7 1622.34   49.90
  -3  -1   7 1625.74   51.69
  -3   1   7 1654.33   49.80
   3   1  -7 1665.93   51.19
  -3   1   7 1651.83   55.99
  -3   1   7 1666.13   86.19
   3   1  -7 1597.54   49.70
  -3   1   7 1699.33   51.79
  -3   1   7 1692.33   51.99
  -2  -1   7  425.56   16.60
   2  -1  -7  413.86   15.30
  -2  -1   7  406.26   15.30
  -2  -1   7  447.26   17.20
   2  -1  -7  430.96   16.00
  -2  -1   7  418.16   16.30
   2  -1  -7  416.46   14.70
   2  -1  -7  445.16   22.20
  -2   1   7  438.16   19.70
  -2   1   7  469.35   35.40
  -2   1   7  462.45   17.10
   2   1  -7  450.85   16.20
   2   1  -7  447.06   23.00
  -2   1   7  428.26   15.50
  -1  -1   7  336.17   14.00
  -1  -1   7  388.76   13.80
   1  -1  -7  363.86   18.60
   1  -1  -7  336.47   12.50
   1  -1  -7  344.27   13.10
  -1   1   7  321.67   26.20
   1   1  -7  349.17   13.90
   1   1  -7  337.57   12.70
   1   1  -7  310.77   16.70
   1   1  -7  326.97   12.10
   0  -1  -7  888.91   28.20
   0  -1   7  879.21   28.90
   0  -1   7  792.62   32.40
   0  -1  -7  901.91   33.90
   0  -1  -7  912.61   28.90
   0   1  -7  894.21   28.50
   0   1  -7  887.11   27.90
   0   1  -7  931.11   30.00
   0   1  -7  899.01   33.70
   1  -1   7   19.50    3.30
  -1  -1  -7   23.70    4.80
  -1  -1  -7   19.60    2.30
  -1  -1  -7   30.60    4.40
  -1  -1  -7   19.80    2.50
  -1   1  -7   15.60    2.40
  -1   1  -7   19.30    3.50
  -1   1  -7   19.00    5.30
   1   1   7   27.30    8.00
  -1   1  -7   19.70    2.50
  -1   1  -7   17.00    2.60
  -2  -1  -7  934.01   32.10
  -2  -1  -7  943.31   30.90
   2  -1   7  935.21   31.20
  -2  -1  -7  931.11   28.70
  -2  -1  -7  953.70   30.10
  -2  -1  -7  926.11   39.40
   2   1   7  989.90   39.60
  -2   1  -7  943.31   29.90
  -2   1  -7  943.81   40.20
  -2   1  -7  924.81   30.50
  -2   1  -7  890.41   30.40
  -2   1  -7  957.80   32.40
   2   1   7  896.81   32.90
  -2   1  -7  921.01   28.50
   2   1   7  949.71   31.30
  -3  -1  -7  469.55   17.50
   3  -1   7  442.86   16.90
   3  -1   7  441.66   17.60
  -3  -1  -7  470.35   15.40
  -3  -1  -7  451.95   16.70
  -3  -1  -7  455.95   25.60
  -3  -1  -7  454.45   18.50
  -3   1  -7  517.95   32.70
  -3   1  -7  449.86   17.20
  -3   1  -7  460.95   18.80
   3   1   7  426.36   20.70
  -3   1  -7  446.66   17.00
   3   1   7  470.75   25.10
  -3   1  -7  473.65   16.60
   3   1   7  467.05   18.10
  -3   1  -7  463.05   15.10
   4  -1   7  159.48    8.50
  -4  -1  -7  157.08    7.90
  -4  -1  -7  152.48    6.30
  -4  -1  -7  148.99    7.30
  -4   1  -7  148.29    7.60
  -4   1  -7  149.19    6.10
   4   1   7  150.18    8.40
  -4   1  -7  140.09    8.40
   4   1   7  152.08   12.90
  -4   1  -7  144.09    6.90
  -4   1  -7  145.29    7.30
  -5  -1  -7  155.68    6.60
  -5  -1  -7  130.89    7.10
   5  -1   7  150.08   11.30
  -5  -1  -7  151.88    6.00
   5  -1   7  149.49    7.50
  -5   1  -7  141.59    5.90
   5   1   7  148.59   11.20
   5   1   7  155.58    7.70
   5   1   7  147.99    6.80
  -5   1  -7  159.08    5.40
  -5   1  -7  136.59    8.20
   5   1   7  153.48    7.70
   6  -1   7   45.60    4.20
   6  -1   7   45.20    2.60
   6   1   7   40.10    4.00
   6   1   7   41.20    2.60
   7  -2  -7   29.00    3.20
  -7  -2   7   35.30    2.50
  -7  -2   7   31.00    2.50
  -7  -2   7   34.60    2.10
  -7   2   7   31.40    3.10
  -7   2   7   34.70    2.50
   7   2  -7   32.50    3.60
   7   2  -7   32.80    3.00
   7   2  -7   35.00    3.30
  -6  -2   7   41.40    5.10
   6  -2  -7   48.10    3.60
  -6  -2   7   49.60    3.90
  -6  -2   7   58.39    4.10
  -6  -2   7   53.89    3.50
   6  -2  -7   38.20    4.20
  -6   2   7   52.89    4.00
  -6   2   7   49.40    5.00
  -6   2   7   48.40    4.40
   6   2  -7   51.19    4.70
   6   2  -7   51.19    4.20
   6   2  -7   50.69    6.00
  -6   2   7   51.49    2.50
   6   2  -7   50.19    5.20
  -5  -2   7  132.19    7.20
  -5  -2   7  133.29    8.00
   5  -2  -7  129.09    7.70
   5  -2  -7  131.79    6.40
  -5  -2   7  127.39    6.40
  -5  -2   7  133.39    7.50
  -5   2   7  111.99    9.00
  -5   2   7  128.39    5.60
   5   2  -7  135.69    7.30
   5   2  -7  130.69    8.60
   5   2  -7  120.59    6.20
   5   2  -7  131.59   10.70
  -5   2   7  128.89    7.10
  -5   2   7  126.99    6.20
  -5   2   7  130.19    8.40
   4  -2  -7 1394.46   41.60
   4  -2  -7 1367.56   44.70
   4  -2  -7 1373.26   43.10
  -4  -2   7 1410.96   44.70
  -4  -2   7 1381.06   82.59
  -4  -2   7 1402.26   43.80
  -4  -2   7 1444.26   45.10
  -4  -2   7 1425.96   46.00
  -4  -2   7 1399.56   48.70
  -4   2   7 1375.56   41.90
  -4   2   7 1449.55   46.80
  -4   2   7 1424.26   48.90
  -4   2   7 1279.47   47.50
  -4   2   7 1401.86   43.10
   4   2  -7 1393.66   43.00
   4   2  -7 1464.55   44.60
   4   2  -7 1457.35   50.59
   4   2  -7 1377.76   43.30
   3  -2  -7  319.47   13.20
  -3  -2   7  328.07   12.80
   3  -2  -7  340.77   13.60
   3  -2  -7  312.57   24.90
   3  -2  -7  325.87   11.50
  -3  -2   7  346.67   14.00
   3  -2  -7  320.97   12.10
  -3  -2   7  335.27   16.90
  -3  -2   7  321.87   13.50
  -3  -2   7  316.57   14.70
   3   2  -7  326.67   12.40
   3   2  -7  348.47   12.80
  -3   2   7  320.37   11.40
  -3   2   7  339.77   22.60
   3   2  -7  341.37   12.10
   3   2  -7  333.17   13.00
  -3   2   7  343.27   12.50
  -3   2   7  317.17   16.20
  -3   2   7  324.17   13.20
   2  -2  -7  642.84   21.10
  -2  -2   7  650.93   23.10
  -2  -2   7  649.64   22.30
   2  -2  -7  618.34   21.60
   2  -2  -7  613.44   20.30
   2  -2  -7  613.94   19.70
  -2  -2   7  585.84   21.90
   2  -2  -7  621.74   29.10
  -2  -2   7  597.74   21.00
   2   2  -7  645.44   21.20
   2   2  -7  665.23   33.30
  -2   2   7  628.54   38.00
  -2   2   7  640.34   25.40
  -2   2   7  563.24   21.20
   1  -2  -7  198.78    9.00
  -1  -2   7  197.88   10.50
  -1  -2   7  207.68   10.10
  -1  -2   7  199.08    9.70
   1  -2  -7  201.88    8.70
   1  -2  -7  185.58   13.30
   1  -2  -7  219.08    8.70
  -1   2   7  191.68   11.50
   1   2  -7  203.58    9.50
   0  -2   7  829.52   28.40
   0  -2  -7  831.72   26.00
   0  -2  -7  854.71   28.80
   0  -2  -7  846.22   27.20
   0  -2   7  874.31   29.40
   0  -2  -7  881.01   27.80
   0  -2   7  774.32   27.20
   0  -2   7  776.42   28.20
   0   2  -7  845.82   28.00
   0   2  -7  854.21   28.70
   0   2  -7  929.81   27.90
   0   2  -7  857.21   31.20
   1  -2   7 1360.96   43.90
  -1  -2  -7 1371.26   42.40
   1  -2   7 1377.86   43.50
  -1  -2  -7 1396.26   41.90
  -1  -2  -7 1371.36   43.90
   1  -2   7 1335.17   42.70
  -1  -2  -7 1326.67   41.00
   1   2   7 1386.26   50.59
  -1   2  -7 1357.36   52.09
  -1   2  -7 1389.36   43.90
  -1   2  -7 1334.57   42.00
   1   2   7 1332.47   45.20
  -1   2  -7 1304.27   41.20
  -2  -2  -7  173.78    9.40
  -2  -2  -7  185.28    8.80
   2  -2   7  179.78    7.20
  -2  -2  -7  180.78    8.20
   2  -2   7  177.38    9.40
  -2  -2  -7  178.58    7.20
  -2  -2  -7  166.78   13.40
  -2   2  -7  184.88   10.30
  -2   2  -7  183.58    6.90
   2   2   7  198.18    9.40
  -2   2  -7  166.58   14.60
  -2   2  -7  182.08    8.70
   2   2   7  184.48   14.20
   2   2   7  165.68   10.90
  -2   2  -7  189.18    8.00
   3  -2   7  350.66   14.40
  -3  -2  -7  346.67   12.20
  -3  -2  -7  347.17   13.50
  -3  -2  -7  341.27   20.70
  -3  -2  -7  347.47   14.10
   3   2   7  348.77   14.80
  -3   2  -7  337.27   15.30
  -3   2  -7  341.87   13.80
  -3   2  -7  349.96   12.90
  -3   2  -7  360.26   11.80
   3   2   7  359.46   21.60
  -3   2  -7  345.87   13.70
   3   2   7  335.97   16.40
  -4  -2  -7  244.68   10.20
  -4  -2  -7  239.98    9.00
   4  -2   7  237.58   11.00
  -4  -2  -7  246.28   10.80
   4  -2   7  236.88    9.60
  -4   2  -7  245.68    8.50
  -4   2  -7  239.98   10.10
   4   2   7  250.77   11.70
   4   2   7  250.57   12.40
  -4   2  -7  237.48    9.30
   4   2   7  226.78   11.20
   4   2   7  249.88   17.00
  -4   2  -7  258.67   12.10
  -5  -2  -7  126.79    8.40
  -5  -2  -7  131.39    5.00
   5  -2   7  123.09    6.50
  -5  -2  -7  127.79    5.80
   5  -2   7  112.99    9.40
  -5   2  -7  116.89    6.80
  -5   2  -7  127.09    5.70
   5   2   7  128.89    6.80
   5   2   7  118.09    5.90
   5   2   7  121.09    9.90
   5   2   7  127.09    6.70
   6  -2   7   20.90    2.60
   6   2   7   20.00    2.50
   7  -3  -7   27.90    2.90
  -7  -3   7   35.00    2.10
  -7  -3   7   32.20    2.40
  -7  -3   7   32.80    2.20
   7   3  -7   38.50    3.00
   7   3  -7   32.10    3.00
  -7   3   7   37.40    2.70
   7   3  -7   34.70    3.50
  -6  -3   7    0.10    1.10
  -6  -3   7    0.30    0.80
   6  -3  -7   -0.50    1.00
   6  -3  -7    0.10    1.30
  -6  -3   7   -0.10    1.00
  -6  -3   7    1.90    1.20
   6  -3  -7    2.00    1.40
  -6   3   7    0.00    1.00
   6   3  -7   -0.70    1.00
  -6   3   7    0.50    1.40
   6   3  -7    2.40    1.90
  -6   3   7    0.90    1.30
   6   3  -7    0.10    1.20
   6   3  -7    1.70    2.00
   6   3  -7   -0.90    1.10
  -5  -3   7  294.17   13.20
  -5  -3   7  280.77   11.80
  -5  -3   7  289.47   11.30
   5  -3  -7  279.67   11.20
  -5  -3   7  283.57   12.50
  -5   3   7  266.37   11.50
   5   3  -7  269.57   11.00
  -5   3   7  288.37   14.90
  -5   3   7  275.37   13.30
   5   3  -7  282.47   11.40
   5   3  -7  288.07   17.20
   5   3  -7  282.07   14.00
   4  -3  -7   40.20    3.10
   4  -3  -7   43.90    4.40
  -4  -3   7   40.70    4.40
   4  -3  -7   44.30    4.20
  -4  -3   7   38.60    4.00
  -4  -3   7   76.79   25.10
  -4  -3   7   37.60    4.20
   4  -3  -7   39.10    3.50
  -4  -3   7   37.50    3.70
  -4   3   7   36.70    4.80
  -4   3   7   40.80    3.90
   4   3  -7   40.20    3.60
   4   3  -7   38.10    3.50
  -4   3   7   46.10    2.70
   4   3  -7   41.70    6.10
   4   3  -7   32.60    4.00
   4   3  -7   35.40    4.40
   3  -3  -7   92.79    5.80
   3  -3  -7   92.09    4.70
  -3  -3   7   93.69    6.70
   3  -3  -7   88.59    6.10
  -3  -3   7   91.99    6.50
  -3  -3   7   85.59    5.80
  -3  -3   7   99.89    5.80
   3  -3  -7   86.19    5.80
   3  -3  -7   90.09    5.20
  -3  -3   7   96.09    8.40
  -3   3   7   96.89    5.70
   3   3  -7   85.39    5.10
   3   3  -7   87.59    6.30
   3   3  -7   91.89    5.50
  -3   3   7   88.59    7.60
   2  -3  -7  192.28    9.20
   2  -3  -7  199.78    8.90
  -2  -3   7  195.88    9.90
   2  -3  -7  189.68    8.00
  -2  -3   7  195.08   10.20
   2  -3  -7  211.58   15.30
  -2   3   7  204.08   21.30
  -2   3   7  189.38    8.70
   2   3  -7  201.28   18.00
  -2   3   7  189.88   11.30
   2   3  -7  190.98    8.40
  -1  -3   7  891.71   30.10
   1  -3  -7  856.31   36.00
   1  -3  -7  828.82   26.90
   1  -3  -7  920.91   28.50
  -1  -3   7  847.22   28.00
  -1  -3   7  815.62   28.70
   1   3  -7  855.81   28.60
  -1   3   7  852.61   31.50
  -1   3   7  823.82   49.60
   1   3  -7  817.82   27.30
   0  -3  -7 2489.25   73.19
   0  -3  -7 2246.58   71.59
   0  -3   7 2504.25   76.09
   0  -3  -7 2511.75   73.89
   0   3  -7 2531.95   74.89
   0   3   7 2609.04   77.79
   0   3   7 2381.86   76.59
  -1  -3  -7  312.07   11.30
   1  -3   7  324.77   14.50
  -1  -3  -7  323.97   12.90
  -1  -3  -7  329.77   12.50
   1  -3   7  333.37   13.90
   1  -3   7  326.57   12.90
   1  -3   7  321.37   13.90
  -1   3  -7  337.07   12.90
  -1   3  -7  307.07   10.50
   1   3   7  335.77   15.70
   1   3   7  326.97   18.80
  -1   3  -7  338.37   14.10
  -2  -3  -7 1375.76   42.50
  -2  -3  -7 1443.26   44.00
  -2  -3  -7 1430.86   54.29
   2  -3   7 1434.46   46.30
  -2  -3  -7 1444.06   44.90
   2  -3   7 1403.96   44.50
   2  -3   7 1432.66   43.60
   2   3   7 1371.86   78.19
  -2   3  -7 1428.36   46.60
   2   3   7 1503.05   54.89
   2   3   7 1432.46   48.30
   2   3   7 1425.56   45.50
  -2   3  -7 1397.46   41.70
  -2   3  -7 1393.46   44.50
  -3  -3  -7   93.89    4.70
  -3  -3  -7   99.09    5.70
   3  -3   7   91.59    6.40
  -3  -3  -7   95.59    7.50
   3   3   7   96.99    7.30
   3   3   7   95.89    6.60
  -3   3  -7   90.89    4.00
  -3   3  -7   98.49    7.00
   3   3   7  100.29    8.30
  -3   3  -7  101.79    6.10
   3   3   7  102.59   10.70
  -4  -3  -7   16.50    2.70
  -4  -3  -7   15.60    2.60
  -4  -3  -7   17.00    1.90
   4  -3   7   19.40    2.80
   4  -3   7   16.30    2.90
   4   3   7   12.60    4.70
   4   3   7   16.10    3.00
   4   3   7   18.10    4.00
   4   3   7   15.60    3.40
   4   3   7   17.80    3.00
  -4   3  -7   17.30    1.30
  -4   3  -7   10.30    2.30
  -4   3  -7   16.30    2.40
   5  -3   7   62.19    4.10
  -5  -3  -7   56.99    2.90
  -5  -3  -7   65.89    5.30
  -5  -3  -7   55.49    3.70
   5   3   7   55.89    4.00
   5   3   7   58.29    4.20
  -5   3  -7   57.99    3.80
   5   3   7   47.40    6.10
  -5   3  -7   46.90    3.90
  -7  -4   7   74.79    3.70
   7  -4  -7   68.59    4.10
   7  -4  -7   74.99    4.10
  -7   4   7   77.19    3.90
   7   4  -7   71.79    4.80
  -6  -4   7   24.80    2.30
  -6  -4   7   16.50    2.70
   6  -4  -7   25.20    3.10
  -6  -4   7   26.20    2.50
  -6  -4   7   25.20    2.80
   6  -4  -7   25.70    2.30
  -6   4   7   24.60    4.20
   6   4  -7   26.50    4.20
  -6   4   7   25.60    3.10
   6   4  -7   21.70    3.30
   6   4  -7   25.10    3.50
   6   4  -7   26.00    2.20
  -6   4   7   25.40    2.30
   6   4  -7   18.70    4.40
  -5  -4   7  213.78   10.20
  -5  -4   7  213.78    9.40
  -5  -4   7  204.88    9.40
  -5  -4   7  211.28   10.70
  -5   4   7  216.08   14.80
   5   4  -7  208.08    9.10
   5   4  -7  199.98   10.10
   5   4  -7  215.78   11.90
   5   4  -7  201.48   17.70
  -5   4   7  227.38   12.40
  -5   4   7  217.98    9.70
   4  -4  -7  430.36   36.30
  -4  -4   7  413.36   16.70
   4  -4  -7  439.36   16.60
  -4  -4   7  436.96   16.20
  -4  -4   7  447.46   18.30
   4  -4  -7  432.46   15.00
   4  -4  -7  425.96   17.60
  -4  -4   7  438.16   17.30
  -4  -4   7  432.46   42.90
   4  -4  -7  427.86   15.90
   4  -4  -7  465.95   17.90
   4   4  -7  453.45   22.70
   4   4  -7  449.76   18.80
  -4   4   7  434.96   16.00
   4   4  -7  459.05   15.90
   4   4  -7  446.96   16.00
  -4   4   7  460.55   18.70
  -4   4   7  416.76   19.60
   4   4  -7  453.25   16.40
   4   4  -7  398.06   21.70
  -3  -4   7   50.29    4.30
  -3  -4   7   47.00    4.50
  -3  -4   7   47.50    4.70
   3  -4  -7   45.80    4.40
  -3  -4   7   48.80    4.90
   3  -4  -7   69.99   17.20
   3  -4  -7   58.09    4.50
   3  -4  -7   37.90    4.30
   3  -4  -7   50.09    3.40
   3  -4  -7   50.49    3.80
   3   4  -7   51.69    5.10
  -3   4   7   56.09    5.80
  -3   4   7   43.40    3.80
   3   4  -7   41.10    3.50
   3   4  -7   69.09   11.70
   3   4  -7   41.00    3.70
  -2  -4   7 1808.62   56.19
   2  -4  -7 1863.21   56.19
   2  -4  -7 1877.81   54.39
   2  -4  -7 1798.62   54.99
  -2  -4   7 1900.01   58.69
  -2  -4   7 1911.41   57.89
   2  -4  -7 1845.12   56.89
  -2  -4   7 1754.92   56.79
   2  -4  -7 1861.21   67.99
   2   4  -7 1903.01   77.89
  -2   4   7 1744.23   59.39
   2   4  -7 1788.82   55.49
   2   4  -7 1815.12   55.39
  -2   4   7 1836.82   57.09
  -2   4   7 1871.01   82.69
  -1  -4   7  135.29    7.40
   1  -4  -7  135.49    5.80
  -1  -4   7  141.89    8.30
  -1  -4   7  145.29   10.70
   1  -4  -7  134.79    6.30
   1  -4  -7  138.09    6.90
  -1  -4   7  126.29    7.60
  -1   4   7  133.59   19.40
  -1   4   7  139.69   10.80
   1   4  -7  140.19    7.40
   1   4  -7  129.79    6.50
  -1   4   7  149.59    9.20
  -1   4   7  120.89   10.00
   1   4  -7  136.39    6.60
   0  -4   7  939.71   31.90
   0  -4  -7  909.21   28.40
   0  -4   7  931.71   30.70
   0  -4  -7  982.20   30.10
   0  -4  -7  934.21   30.60
   0  -4   7  927.31   31.60
   0   4   7  923.21   32.70
   0   4   7  906.61   33.70
   0   4   7  867.91   54.79
   0   4  -7  888.61   29.70
   0   4  -7  963.00   31.30
   0   4   7  900.11   32.00
   0   4   7  954.70   38.00
  -1  -4  -7 1793.42   55.89
  -1  -4  -7 1960.40   58.29
   1  -4   7 1947.51   59.79
   1  -4   7 1938.81   58.39
   1  -4   7 1843.52   60.59
   1  -4   7 1919.21   59.69
  -1  -4  -7 1966.50   57.59
   1   4   7 1919.51   67.89
   1   4   7 1822.92   92.49
  -1   4  -7 1809.42   60.69
  -1   4  -7 1879.81   57.69
   1   4   7 2013.70   60.29
   1   4   7 1891.61   60.49
   1   4   7 1897.61   58.59
   1   4   7 1902.01   61.99
  -2  -4  -7  675.83   23.00
   2  -4   7  654.13   23.50
  -2  -4  -7  671.03   22.30
   2  -4   7  651.33   24.30
   2  -4   7  641.84   24.70
  -2  -4  -7  640.34   20.90
   2  -4   7  644.04   22.40
   2   4   7  670.03   23.80
   2   4   7  658.93   25.20
  -2   4  -7  666.13   22.90
   2   4   7  683.93   32.20
   2   4   7  656.13   25.20
  -2   4  -7  640.04   24.30
   2   4   7  666.63   22.50
   2   4   7  634.34   26.50
  -3  -4  -7  256.17    9.60
  -3  -4  -7  263.97   11.50
   3  -4   7  272.27   12.40
  -3  -4  -7  273.67   11.00
   3   4   7  263.97   18.20
   3   4   7  271.07   12.30
   3   4   7  272.07   14.50
  -3   4  -7  262.77   11.30
  -3   4  -7  268.17   12.80
   3   4   7  271.67   13.20
   3   4   7  267.77   13.70
  -4  -4  -7  226.48   12.10
  -4  -4  -7  223.68    8.30
   4  -4   7  231.88   10.00
  -4  -4  -7  247.88    9.60
   4   4   7  239.78   12.10
   4   4   7  237.78   10.90
   4   4   7  233.58   10.80
  -4   4  -7  240.38    9.80
  -4   4  -7  208.08   10.70
   4   4   7  226.18   15.80
   4   4   7  227.58   11.50
  -5  -4  -7   39.10    2.20
  -5  -4  -7   38.70    2.60
   5  -4   7   41.50    3.20
  -5   4  -7   39.00    2.80
  -5   4  -7   43.10    4.00
   5   4   7   39.70    3.20
   5   4   7   38.30    5.00
   5   4   7   38.70    3.20
   7  -5  -7   93.69    4.10
  -7  -5   7  100.69    3.60
   7   5  -7   76.19    4.90
   7   5  -7  105.49    4.70
  -6  -5   7   95.69    4.40
  -6  -5   7   84.19    4.90
   6  -5  -7   89.39    4.50
  -6  -5   7   95.89    5.10
   6   5  -7   91.69    6.00
   6   5  -7   90.29    8.20
  -6   5   7   78.09    5.70
   6   5  -7   81.19    6.10
   6   5  -7   91.19    4.60
  -6   5   7   89.39    5.50
   5  -5  -7  156.88    7.30
  -5  -5   7  159.88    8.50
  -5  -5   7  146.79    6.90
  -5  -5   7  151.68    7.20
  -5  -5   7  145.69    7.90
   5  -5  -7  144.39    6.20
   5   5  -7  158.58    8.10
   5   5  -7  150.28   12.10
   5   5  -7  143.29    7.20
  -5   5   7  156.98    9.40
  -5   5   7  155.78    8.70
   5   5  -7  159.08    9.60
  -5   5   7  148.39    6.60
   5   5  -7  144.39    7.20
   4  -5  -7  185.88    7.80
   4  -5  -7  188.58    9.20
   4  -5  -7  177.18    9.70
  -4  -5   7  183.38    9.50
  -4  -5   7  178.78    8.90
  -4  -5   7  174.38    8.50
  -4  -5   7  193.28   10.50
   4  -5  -7  188.68    8.60
  -4   5   7  179.08    7.90
   4   5  -7  181.68    7.60
  -4   5   7  175.28    9.40
  -4   5   7  180.28   10.20
   4   5  -7  177.18    8.50
   4   5  -7  206.88   14.10
   4   5  -7  190.48    8.60
   4   5  -7  195.58   10.80
   4   5  -7  198.88    9.10
  -4   5   7  189.68   11.20
  -3  -5   7  587.14   22.40
   3  -5  -7  595.84   21.70
  -3  -5   7  567.54   24.20
  -3  -5   7  658.83   23.70
  -3  -5   7  604.54   21.30
   3  -5  -7  617.64   20.00
   3  -5  -7  612.24   22.60
   3  -5  -7  585.24   40.90
   3  -5  -7  604.34   22.60
   3  -5  -7  605.64   20.60
  -3   5   7  622.54   23.90
   3   5  -7  604.14   20.60
  -3   5   7  583.14   24.10
   3   5  -7  588.24   21.00
   3   5  -7  593.24   20.00
   3   5  -7  624.94   39.60
   2  -5  -7  342.47   12.20
  -2  -5   7  336.27   15.40
   2  -5  -7  337.47   14.40
  -2  -5   7  331.17   14.20
  -2  -5   7  324.57   13.70
  -2  -5   7  355.16   15.10
   2  -5  -7  338.27   12.70
   2  -5  -7  377.46   22.70
   2  -5  -7  342.77   13.70
  -2   5   7  341.47   16.10
   2   5  -7  339.57   13.30
  -2   5   7  351.36   14.40
   2   5  -7  352.66   29.10
  -2   5   7  338.47   15.80
   2   5  -7  339.27   12.70
   1  -5  -7   34.50    3.30
  -1  -5   7   30.80    4.10
  -1  -5   7   35.40    4.30
   1  -5  -7   40.50    8.30
  -1  -5   7   34.50    5.10
   1  -5  -7   35.20    2.70
  -1  -5   7   33.70    4.20
   1  -5  -7   33.90    3.50
   1  -5  -7   38.80    3.30
   1   5  -7   43.70    3.50
  -1   5   7   36.30   11.10
  -1   5   7   34.60    4.30
  -1   5   7   33.80    5.70
   1   5  -7   32.30    3.10
  -1   5   7   37.80    4.10
   0  -5  -7   39.90    8.60
   0  -5  -7   47.30    3.60
   0  -5   7   44.10    4.80
   0  -5  -7   46.20    4.00
   0  -5   7   48.80    5.00
   0  -5   7   40.60    4.40
   0  -5   7   41.70    4.80
   0  -5  -7   40.70    3.00
   0   5  -7   41.90    3.60
   0   5   7   50.19   14.00
   0   5   7   50.59    7.00
   0   5   7   39.00    4.40
   0   5   7   41.40    4.80
   0   5   7   43.10    4.10
   0   5  -7   44.50    4.00
   0   5  -7   42.60    3.50
  -1  -5  -7  815.02   26.70
  -1  -5  -7  866.21   28.30
   1  -5   7  873.71   30.80
  -1  -5  -7  862.61   28.70
   1  -5   7  866.41   31.50
   1   5   7  837.82   31.40
   1   5   7  872.51   29.50
   1   5   7  837.72   57.59
  -1   5  -7  836.12   28.10
  -1   5  -7  997.40   32.00
   1   5   7  937.61   38.60
  -1   5  -7  803.52   29.60
   2  -5   7  333.67   14.70
   2  -5   7  314.77   14.90
  -2  -5  -7  324.87   13.10
  -2  -5  -7  316.97   11.40
   2  -5   7  332.77   13.30
  -2  -5  -7  315.97   12.50
   2  -5   7  339.67   14.20
   2   5   7  306.27   13.70
   2   5   7  321.17   20.10
   2   5   7  341.37   15.70
   2   5   7  326.07   17.00
  -2   5  -7  309.27   14.10
   2   5   7  321.17   15.20
   2   5   7  326.77   15.30
  -2   5  -7  320.47   13.00
  -2   5  -7  311.87   12.40
   3  -5   7  231.78    8.90
  -3  -5  -7  244.18   10.10
  -3  -5  -7  240.48    8.90
  -3  -5  -7  252.07   10.50
   3  -5   7  240.78   12.40
  -3   5  -7  221.38    9.40
   3   5   7  269.97   14.20
   3   5   7  240.18   17.80
  -3   5  -7  247.48   11.80
   3   5   7  258.17   11.60
   3   5   7  245.58   12.20
  -3   5  -7  238.58   10.50
   3   5   7  251.57   13.60
  -4  -5  -7  212.78    8.70
  -4  -5  -7  215.58    8.00
   4  -5   7  216.98    9.50
  -4  -5  -7  217.98    9.10
  -4   5  -7  223.78   10.90
   4   5   7  202.18   10.50
   4   5   7  206.18   14.20
   4   5   7  216.48    9.90
   4   5   7  217.58   11.50
   4   5   7  224.58   11.00
  -4   5  -7  224.98    9.10
  -5  -5  -7  153.98    5.30
   5  -5   7  150.88    6.30
   5   5   7  152.28    9.00
   5   5   7  139.69    6.40
  -5   5  -7  157.58    6.00
   5   5   7  155.68    9.30
  -6  -6   7  107.49    5.30
   6  -6  -7  111.19    5.00
  -6  -6   7  112.39    4.70
  -6   6   7  113.39    7.60
   6   6  -7   84.49    7.80
   6   6  -7  107.19    4.90
   6   6  -7  101.09    6.30
  -6   6   7  106.19    5.60
   6   6  -7  122.09    6.00
   5  -6  -7  114.49    5.90
  -5  -6   7  105.49    5.30
  -5  -6   7  108.19    6.50
  -5  -6   7  106.59    5.30
  -5  -6   7  106.89    6.20
   5   6  -7  108.89    6.20
   5   6  -7  103.49    5.60
   5   6  -7  101.39    7.30
   5   6  -7  109.09   10.00
  -5   6   7  102.69    6.80
   5   6  -7  104.79    5.70
  -5   6   7  116.09    6.80
   4  -6  -7  294.87   12.10
   4  -6  -7  296.27   11.90
   4  -6  -7  296.47   12.50
  -4  -6   7  295.07   12.80
   4  -6  -7  299.07   13.50
  -4  -6   7  307.57   11.90
  -4  -6   7  267.77   11.60
  -4  -6   7  299.27   13.40
  -4   6   7  296.67   13.30
   4   6  -7  304.97   18.20
  -4   6   7  296.07   13.90
  -4   6   7  272.77   12.50
   4   6  -7  275.07   11.90
   4   6  -7  284.67   15.00
   4   6  -7  290.67   13.90
   3  -6  -7    9.50    2.10
   3  -6  -7    7.50    2.10
  -3  -6   7   13.10    2.60
  -3  -6   7    4.50    1.90
   3  -6  -7    8.70    2.40
   3  -6  -7    7.20    1.70
  -3  -6   7   11.00    2.70
  -3  -6   7    9.10    2.30
   3   6  -7    6.30    3.50
   3   6  -7    8.60    2.20
   3   6  -7   11.80    2.50
  -3   6   7    5.50    2.40
   3   6  -7    8.00    2.20
   3   6  -7   11.50    1.80
  -3   6   7    8.20    2.60
  -3   6   7    7.20    2.40
   2  -6  -7  282.97   12.90
  -2  -6   7  281.47   13.70
   2  -6  -7  267.87   11.10
   2  -6  -7  288.37   12.40
  -2  -6   7  267.27   12.30
   2  -6  -7  279.87   10.60
  -2  -6   7  283.77   13.30
  -2  -6   7  286.47   12.40
  -2   6   7  282.27   14.50
   2   6  -7  293.37   11.90
  -2   6   7  286.77   13.30
   2   6  -7  282.97   10.60
   2   6  -7  297.37   30.10
  -2   6   7  272.87   12.50
   1  -6  -7 1033.70   34.00
   1  -6  -7 1052.99   34.90
  -1  -6   7 1051.49   36.10
   1  -6  -7 1073.89   45.10
   1  -6  -7 1124.19   35.60
  -1  -6   7 1032.60   36.90
   1   6  -7 1078.29   35.50
  -1   6   7 1049.20   37.90
   1   6  -7 1098.19   33.60
  -1   6   7 1023.00   36.90
  -1   6   7 1049.30   34.70
  -1   6   7 1042.10   42.40
  -1   6   7 1058.69   61.69
  -1   6   7  945.31   41.30
   0  -6  -7  599.24   30.80
   0  -6  -7  622.64   21.90
   0  -6   7  614.14   22.30
   0  -6   7  603.44   22.90
   0  -6   7  606.64   23.60
   0  -6   7  606.94   24.10
   0  -6  -7  621.54   21.40
   0   6  -7  621.54   20.90
   0   6   7  619.04   25.20
   0   6   7  590.54   45.40
   0   6   7  611.44   24.00
   0   6  -7  607.44   21.70
   0   6   7  629.54   23.90
   0   6  -7  603.34   21.50
   0   6   7  645.44   29.90
  -1  -6  -7  161.38    6.80
   1  -6   7  163.48   10.00
   1  -6   7  166.38    9.50
   1  -6   7  173.48    9.00
  -1  -6  -7  174.18    8.50
   1  -6   7  168.68    9.90
  -1  -6  -7  162.28    7.80
  -1   6  -7  174.48    8.00
   1   6   7  147.19    9.40
   1   6   7  155.78   21.80
  -1   6  -7  169.18    8.80
   1   6   7  163.58   13.70
   1   6   7  169.18   10.70
   1   6   7  162.88    9.90
   1   6   7  185.68   13.10
  -1   6  -7  159.48    7.90
   2  -6   7    3.50    2.00
   2  -6   7    5.50    2.10
  -2  -6  -7    5.80    1.20
   2  -6   7    5.70    2.50
  -2  -6  -7    4.60    1.50
   2  -6   7    2.70    1.70
  -2  -6  -7    4.70    1.50
  -2   6  -7    5.60    1.70
   2   6   7    5.60    2.10
   2   6   7   16.40    5.40
   2   6   7    5.30    2.00
   2   6   7    7.80    4.00
   2   6   7    8.40    2.50
  -2   6  -7    9.20    2.20
   2   6   7    7.10    2.60
  -2   6  -7    3.70    1.80
  -3  -6  -7  234.68    9.70
  -3  -6  -7  236.38   10.20
   3  -6   7  260.97   11.60
  -3  -6  -7  235.88    8.70
   3  -6   7  241.88    9.10
   3   6   7  263.67   13.80
   3   6   7  252.27   12.00
   3   6   7  262.17   11.40
   3   6   7  228.38   16.10
  -3   6  -7  251.47    9.80
   3   6   7  239.98   12.40
  -3   6  -7  230.08   11.00
  -3   6  -7  250.37   10.30
   4  -6   7    6.50    1.80
  -4  -6  -7    6.10    1.00
   4   6   7    2.00    2.00
   4   6   7    4.20    1.50
   4   6   7   10.80    2.60
  -4   6  -7    7.10    1.90
  -4   6  -7    5.60    1.40
   4   6   7    5.40    1.60
   4   6   7    8.50    3.40
   5  -6   7   92.49    4.00
  -5  -6  -7   97.19    3.30
   5  -6   7   83.59    5.30
   5   6   7   90.69    6.20
  -6  -7   7  100.59    5.00
  -6  -7   7  107.89    4.00
   6  -7  -7  112.89    4.50
   6   7  -7  104.99    4.30
   6   7  -7  115.29    5.00
   6   7  -7   89.39    7.50
  -6   7   7   83.49    5.50
   5  -7  -7   32.90    2.90
  -5  -7   7   32.50    2.50
  -5  -7   7   34.10    3.10
   5  -7  -7   34.50    3.10
  -5  -7   7   27.30    2.90
  -5   7   7   28.40    3.00
   5   7  -7   30.20    6.30
   5   7  -7   29.00    3.30
  -5   7   7   32.80    3.30
   5   7  -7   26.40    3.20
   5   7  -7   35.90    3.50
   4  -7  -7   98.79    6.20
   4  -7  -7   92.79    5.10
  -4  -7   7   97.19    5.40
   4  -7  -7   94.99    5.50
   4  -7  -7   88.59    7.30
  -4  -7   7  100.09    6.10
  -4  -7   7   94.19    6.30
  -4   7   7   99.99    6.30
   4   7  -7   96.49    9.50
  -4   7   7   93.99    5.90
   4   7  -7   95.89    5.80
  -4   7   7  102.59    6.40
   4   7  -7   97.19    5.60
   4   7  -7   98.59    5.60
   4   7  -7   94.49    6.70
  -3  -7   7  380.16   16.20
   3  -7  -7  390.76   15.40
  -3  -7   7  333.17   14.10
  -3  -7   7  378.26   15.40
   3  -7  -7  361.36   15.60
   3  -7  -7  353.76   13.70
   3  -7  -7  376.56   13.40
   3   7  -7  354.36   14.10
   3   7  -7  371.56   14.10
  -3   7   7  377.76   15.20
  -3   7   7  370.96   16.40
  -3   7   7  378.06   15.10
   3   7  -7  358.96   19.70
   3   7  -7  381.06   14.50
  -2  -7   7  686.83   25.40
   2  -7  -7  688.93   24.30
  -2  -7   7  630.34   23.70
   2  -7  -7  687.63   22.80
   2  -7  -7  668.23   22.20
  -2  -7   7  707.13   24.10
  -2   7   7  695.73   26.90
  -2   7   7  667.73   24.20
  -2   7   7  708.53   23.70
   2   7  -7  706.13   23.80
  -2   7   7  691.63   24.10
   2   7  -7  678.33   21.70
   2   7  -7  706.63   29.80
  -1  -7   7  729.93   26.90
   1  -7  -7  698.43   23.60
  -1  -7   7  737.93   27.80
  -1  -7   7  736.23   25.60
   1  -7  -7  738.23   25.70
  -1  -7   7  737.43   25.80
   1  -7  -7  717.23   24.90
   1  -7  -7  724.93   23.20
  -1   7   7  754.32   28.80
  -1   7   7  729.93   26.70
   1   7  -7  723.73   23.40
  -1   7   7  756.12   32.50
  -1   7   7  692.03   24.30
   1   7  -7  725.03   24.80
   0  -7   7 1375.96   43.10
   0  -7  -7 1292.37   41.70
   0  -7  -7 1287.37   40.20
   0  -7  -7 1381.66   42.80
   0  -7  -7 1288.87   40.60
   0  -7   7 1344.77   44.70
   0  -7   7 1325.07   43.50
   0  -7   7 1371.16   45.60
   0   7  -7 1308.07   41.10
   0   7   7 1353.26   44.60
   0   7   7 1329.37   40.30
   0   7  -7 1303.67   42.10
   0   7   7 1364.36   46.40
   0   7   7 1360.36   44.00
   0   7   7 1384.96   51.79
   0   7  -7 1339.97   41.50
  -1  -7  -7  282.17   11.80
   1  -7   7  311.27   14.30
   1  -7   7  307.97   14.80
   1  -7   7  302.57   13.00
  -1  -7  -7  302.07   12.50
  -1  -7  -7  288.97   10.70
   1  -7   7  307.17   13.70
   1   7   7  373.26   18.30
  -1   7  -7  311.77   12.60
   1   7   7  296.47   14.10
  -1   7  -7  294.97   12.10
   1   7   7  308.67   15.00
   1   7   7  300.07   14.40
   1   7   7  268.17   18.40
  -1   7  -7  303.87   11.80
   2  -7   7  214.08   10.60
  -2  -7  -7  209.08    9.40
   2  -7   7  196.88    9.50
  -2  -7  -7  206.68    7.80
  -2  -7  -7  216.88    9.00
   2  -7   7  203.18   11.30
   2  -7   7  211.28   10.40
   2   7   7  193.78   14.90
   2   7   7  202.78   11.00
  -2   7  -7  213.18    9.00
  -2   7  -7  212.98    9.00
   2   7   7  236.38   14.10
  -2   7  -7  202.28    9.60
   2   7   7  218.88   11.20
   2   7   7  201.18   10.70
   3  -7   7   21.60    2.80
  -3  -7  -7   26.00    2.40
  -3  -7  -7   25.30    1.90
   3  -7   7   22.30    3.40
  -3  -7  -7   24.30    2.50
   3   7   7   23.50    5.10
   3   7   7   16.40    2.90
   3   7   7   21.30    3.90
  -3   7  -7   22.20    2.40
  -3   7  -7   23.50    3.70
   3   7   7   15.90    4.30
  -3   7  -7   22.10    2.10
  -4  -7  -7   21.70    1.90
  -4  -7  -7   21.20    1.50
   4  -7   7   29.80    2.60
   4   7   7   25.30    2.10
   4   7   7   15.70    3.50
  -4   7  -7   26.50    2.70
  -4   7  -7   26.50    2.20
   5  -8  -7   37.70    2.80
  -5  -8   7   38.40    2.40
  -5  -8   7   35.80    2.80
  -5   8   7   41.10    2.90
   5   8  -7   35.00    2.60
   5   8  -7   36.20    3.10
   5   8  -7   39.30    5.20
   4  -8  -7  216.38    8.90
   4  -8  -7  221.28    8.50
   4  -8  -7  202.18    9.40
  -4  -8   7  217.38    9.50
  -4  -8   7  214.08    8.50
  -4  -8   7  219.48    9.90
   4  -8  -7  200.38   10.20
  -4   8   7  225.68    9.30
   4   8  -7  227.68    9.20
   4   8  -7  205.68   13.60
   4   8  -7  225.58    9.10
   4   8  -7  212.88    8.90
  -4   8   7  206.18    8.50
  -3  -8   7  244.08   11.20
  -3  -8   7  248.38   10.30
   3  -8  -7  246.48    9.60
   3  -8  -7  253.77   11.80
  -3  -8   7  254.27   11.80
   3  -8  -7  238.38    9.90
  -3   8   7  256.47   10.40
  -3   8   7  263.97   10.60
   3   8  -7  239.18   10.40
  -3   8   7  233.88   11.80
   3   8  -7  244.18   10.30
   3   8  -7  240.48   15.10
  -2  -8   7   41.00    4.20
  -2  -8   7   42.80    3.90
   2  -8  -7   38.30    3.20
  -2  -8   7   40.90    4.40
   2  -8  -7   41.60    3.10
   2  -8  -7   38.90    3.90
  -2  -8   7   41.10    4.00
   2  -8  -7   46.90    4.20
  -2   8   7   35.40    4.60
   2   8  -7   35.90    5.40
  -2   8   7   41.60    3.40
   2   8  -7   36.70    3.50
  -1  -8   7  231.38   12.40
  -1  -8   7  252.97   12.50
   1  -8  -7  250.87   11.50
   1  -8  -7  243.88   10.80
  -1  -8   7  261.97   12.90
  -1  -8   7  254.67   15.20
   1  -8  -7  237.18    9.50
   1   8  -7  236.58    8.60
  -1   8   7  248.18    8.80
   1   8  -7  212.98   14.60
  -1   8   7  244.78   11.90
  -1   8   7  245.58   13.20
   1   8  -7  247.98   10.60
   0  -8  -7   18.00    2.00
   0  -8  -7   20.40    2.30
   0  -8  -7   18.30    2.90
   0  -8  -7   22.10    2.80
   0  -8   7   21.70    4.10
   0  -8   7   17.90    3.70
   0  -8   7   25.80    4.10
   0   8  -7   20.10    2.10
   0   8  -7   21.80    3.70
   0   8   7   12.40    3.60
   0   8   7   27.30    4.40
   0   8  -7   20.10    2.60
  -1  -8  -7   58.69    3.40
   1  -8   7   58.79    5.30
   1  -8   7   58.59    5.50
  -1  -8  -7   59.69    4.40
   1  -8   7   55.79    5.10
   1  -8   7   61.39    5.00
   1   8   7   51.89    5.20
  -1   8  -7   62.09    3.90
  -1   8  -7   56.49    3.60
   1   8   7   60.79    8.10
   1   8   7   60.79    5.70
  -1   8  -7   53.89    4.00
   2  -8   7    0.70    1.40
   2  -8   7    5.70    2.50
  -2  -8  -7    2.70    1.20
  -2  -8  -7    5.40    1.10
  -2  -8  -7    3.90    1.30
   2  -8   7    3.30    1.70
   2  -8   7    4.40    1.70
   2   8   7    1.50    1.50
   2   8   7    7.00    3.70
  -2   8  -7    2.60    1.40
   2   8   7    3.30    1.60
  -2   8  -7    4.40    1.30
  -2   8  -7    4.50    1.40
  -3  -8  -7   15.50    1.80
   3  -8   7   21.50    2.90
   3  -8   7   17.40    1.70
   3   8   7   16.50    2.60
  -3   8  -7   15.40    1.70
  -3   8  -7   18.80    2.00
   3   8   7   14.50    4.10
  -3   8  -7   11.60    1.90
   4  -8   7  255.57    8.90
  -4   8  -7  250.97    8.40
   5  -9  -7  169.08    6.10
   5   9  -7  140.69    8.70
  -4  -9   7   32.20    3.00
  -4  -9   7   33.50    2.80
   4  -9  -7   38.10    2.80
   4  -9  -7   29.10    3.20
   4  -9  -7   34.50    3.40
   4   9  -7   37.90    3.00
   4   9  -7   33.20    5.10
   4   9  -7   30.50    2.70
  -4   9   7   34.10    2.20
   3  -9  -7  225.98    8.80
  -3  -9   7  237.58    9.20
   3  -9  -7  225.98   10.10
  -3  -9   7  234.98   10.10
   3  -9  -7  200.78   10.30
  -3  -9   7  235.78   10.60
   3   9  -7  232.78    9.40
  -3   9   7  233.38   10.60
   3   9  -7  239.08    9.60
   3   9  -7  239.58   15.00
  -3   9   7  232.28    8.30
  -2  -9   7    7.70    2.10
   2  -9  -7    9.00    1.80
   2  -9  -7    8.50    1.60
  -2  -9   7    7.60    2.30
  -2  -9   7    8.30    3.00
   2  -9  -7    8.80    2.20
   2   9  -7    6.80    1.70
  -2   9   7    7.10    2.20
   2   9  -7    9.80    3.20
   2   9  -7    9.70    1.90
  -1  -9   7  379.26   14.70
  -1  -9   7  388.36   14.70
   1  -9  -7  388.96   14.80
   1  -9  -7  372.26   15.10
   1  -9  -7  386.26   13.40
  -1  -9   7  399.96   16.00
  -1  -9   7  385.46   16.50
   1  -9  -7  366.46   13.10
   1   9  -7  387.16   17.80
   1   9  -7  378.36   14.30
  -1   9   7  384.46   17.20
   0  -9   7   13.20    2.60
   0  -9   7   15.60    3.30
   0  -9  -7    8.00    1.90
   0  -9   7    8.20    2.40
   0  -9  -7    9.80    1.60
   0  -9   7    9.10    2.20
   0   9   7   19.20    4.00
   0   9  -7    9.90    1.90
   0   9   7    8.80    2.50
  -1  -9  -7   87.99    4.90
  -1  -9  -7   89.99    5.20
   1  -9   7   83.79    6.30
  -1  -9  -7   85.39    4.10
   1  -9   7   90.59    5.60
   1  -9   7   94.49    6.30
   1  -9   7   88.59    5.70
  -1   9  -7   87.29    4.10
   1   9   7   88.89    9.30
   1   9   7   95.89    6.40
  -1   9  -7   87.09    4.90
   1   9   7   87.49    6.40
   2  -9   7   77.59    5.00
   2  -9   7   83.19    5.30
   2  -9   7   83.89    4.80
   2   9   7   81.79    5.40
  -2   9  -7   79.69    4.20
   2   9   7   88.19    8.30
   2   9   7   75.09    4.70
  -2   9  -7   82.19    3.80
   3  -9   7   38.40    2.90
  -3   9  -7   35.20    1.90
   3   9   7   37.50    4.80
  -3   9  -7   29.40    1.80
   4 -10  -7  138.89    5.30
   4 -10  -7  142.39    5.30
   4  10  -7  124.29    5.10
   4  10  -7  137.89    5.40
   4  10  -7  114.59    7.20
   3 -10  -7   18.80    2.20
   3 -10  -7   22.70    2.20
   3 -10  -7   14.60    2.40
  -3 -10   7   21.50    3.00
  -3 -10   7   21.20    2.00
   3  10  -7   18.30    3.90
   3  10  -7   18.20    1.90
   3  10  -7   20.90    2.00
   2 -10  -7    7.60    1.90
  -2 -10   7    9.40    1.90
   2 -10  -7   10.70    2.00
   2 -10  -7    5.80    1.60
   2 -10  -7   10.50    1.60
   2  10  -7   13.40    3.60
   2  10  -7   12.10    2.10
  -2  10   7    8.50    2.20
   2  10  -7    9.90    1.90
   1 -10  -7   51.49    3.90
  -1 -10   7   50.19    4.30
   1 -10  -7   46.70    3.80
  -1 -10   7   45.40    3.70
  -1 -10   7   47.00    4.20
   1 -10  -7   53.19    3.10
  -1 -10   7   52.79    4.30
  -1  10   7   51.09    4.80
   1  10  -7   47.30    3.70
   0 -10   7   26.60    3.40
   0 -10   7   24.40    3.00
   0 -10  -7   28.50    2.20
   0 -10   7   24.70    3.20
   0 -10   7   22.00    2.60
   0 -10  -7   27.00    2.80
   0  10   7   29.50    3.90
   0  10  -7   29.30    2.60
   1 -10   7   39.80    3.30
   1 -10   7   44.10    3.80
   1 -10   7   40.50    3.60
  -1  10  -7   41.60    2.90
   1  10   7   41.50    3.80
   2 -10   7    1.70    1.40
   2 -10   7    1.70    1.40
  -2  10  -7    1.80    0.70
   3 -11  -7   79.69    3.70
   3  11  -7   70.39    3.30
   3  11  -7   76.39    3.30
  -2 -11   7   31.90    2.10
  -2 -11   7   31.60    3.80
   2  11  -7   29.00    2.00
   2  11  -7   23.70    2.10
  -2  11   7   33.80    3.00
   1 -11  -7  162.58    7.30
  -1 -11   7  182.18    7.70
  -1 -11   7  193.28    7.10
   1 -11  -7  185.38    6.50
  -1  11   7  181.28    8.20
   1  11  -7  147.59    6.60
   1  11  -7  186.38    7.20
   0 -11   7   23.10    2.60
   0 -11   7   20.60    2.40
   0  11  -7   18.40    1.80
   0  11  -7   21.30    1.60
   0  11   7   24.80    2.80
   1 -11   7    1.10    0.80
  -1  11  -7    0.30    0.50
   1  11   7    1.50    1.50
   7   0  -8   38.40    2.50
  -7   0   8   39.40    2.60
   7   0  -8   44.30    3.40
  -6   0   8    3.20    1.30
  -6   0   8   -0.20    2.40
  -6   0   8    4.50    1.60
  -6   0   8    3.80    1.10
   6   0  -8    7.30    1.90
   6   0  -8    3.30    1.70
  -5   0   8   43.10    3.70
  -5   0   8   49.10    5.50
  -5   0   8   48.80    4.90
  -5   0   8   52.49    4.50
  -5   0   8   45.20    4.30
  -5   0   8   47.60    3.40
   5   0  -8   42.50    4.40
  -4   0   8  377.86   25.30
   4   0  -8  398.96   14.20
  -4   0   8  431.06   41.60
   4   0  -8  413.56   15.90
   4   0  -8  393.96   19.00
  -4   0   8  409.26   16.50
  -4   0   8  390.76   19.30
  -4   0   8  387.66   15.90
  -4   0   8  411.16   14.40
  -3   0   8  188.08   12.20
   3   0  -8  183.68    8.80
  -3   0   8  196.68    9.00
  -3   0   8  178.88    9.30
  -3   0   8  177.28    9.20
  -3   0   8  179.78    7.90
  -3   0   8  161.88   24.60
   3   0  -8  174.08    7.70
  -2   0   8  517.15   18.60
  -2   0   8  527.85   23.30
  -2   0   8  529.85   40.60
  -2   0   8  492.65   17.30
   2   0  -8  522.65   16.80
   2   0  -8  525.35   17.50
  -2   0   8  526.55   19.50
   2   0  -8  503.65   18.40
  -2   0   8  528.75   19.30
   1   0  -8   11.00    4.00
   1   0  -8   21.30    1.90
   1   0  -8   20.60    2.90
  -1   0   8   26.00   14.80
  -1   0   8   15.90    2.80
   1   0  -8   23.30    2.80
  -1   0   8   16.10    2.60
  -1   0   8   16.60    3.40
   1   0  -8   22.30    3.30
   0   0  -8   22.60    2.70
   0   0   8   12.50    2.70
   0   0  -8   17.70    2.50
   0   0  -8   22.20    2.00
   0   0  -8   16.30    5.40
   0   0  -8   14.20    2.40
   0   0  -8    9.30    2.30
   0   0   8   16.00    2.00
  -1   0  -8  511.35   19.00
   1   0   8  551.44   25.30
  -1   0  -8  541.55   18.60
  -1   0  -8  537.65   19.30
  -1   0  -8  526.05   17.20
   1   0   8  526.35   19.40
  -1   0  -8  538.65   20.60
   2   0   8  464.05   23.70
  -2   0  -8  456.35   14.70
  -2   0  -8  437.26   18.00
  -2   0  -8  433.96   25.40
  -2   0  -8  437.76   16.30
   2   0   8  422.96   16.20
  -2   0  -8  412.96   16.70
  -2   0  -8  457.15   16.90
   2   0   8  441.36   16.80
  -3   0  -8  497.45   18.50
   3   0   8  513.45   26.00
  -3   0  -8  499.95   17.80
  -3   0  -8  487.95   19.70
   3   0   8  504.55   18.70
  -3   0  -8  511.45   16.40
   4   0   8  120.29   10.60
   4   0   8  133.79    7.10
  -4   0  -8  119.89    6.60
  -4   0  -8  134.79    7.60
  -4   0  -8  133.49    6.20
  -4   0  -8  137.39    5.30
   5   0   8   84.59    4.90
   5   0   8   80.79    4.40
   5   0   8   74.19    6.50
   5   0   8   68.19    3.80
  -5   0  -8   79.59    3.30
  -7  -1   8    1.50    0.80
  -7  -1   8    1.30    0.50
   7  -1  -8    0.20    1.10
   7  -1  -8    1.40    1.20
   7   1  -8    2.60    1.20
  -7   1   8    1.40    0.70
   7   1  -8    2.60    1.00
   7   1  -8    0.40    1.10
   6  -1  -8   14.60    2.30
  -6  -1   8   15.30    2.40
  -6  -1   8   19.00    2.40
  -6  -1   8   17.60    2.00
  -6  -1   8   13.50    2.10
   6   1  -8   19.90    3.00
  -6   1   8   15.20    2.40
  -6   1   8    8.60    2.60
  -6   1   8   19.50    2.40
   6   1  -8   15.10    3.20
  -6   1   8   16.40    2.80
  -5  -1   8  193.98   11.90
  -5  -1   8  179.58    9.60
   5  -1  -8  185.98    8.00
  -5  -1   8  192.48    8.20
  -5  -1   8  195.28    9.20
  -5  -1   8  189.18    9.10
   5  -1  -8  173.18    9.40
   5   1  -8  178.48   11.90
  -5   1   8  194.48   11.00
  -5   1   8  181.98   11.40
   5   1  -8  195.88    9.40
  -5   1   8  181.18    8.10
  -5   1   8  194.68    7.90
  -5   1   8  190.98    9.20
  -4  -1   8  112.09    9.00
   4  -1  -8  124.79    7.30
  -4  -1   8  123.89    7.80
  -4  -1   8  122.29    6.30
   4  -1  -8  127.99    6.20
  -4  -1   8  120.29    7.40
  -4  -1   8  126.09    7.30
  -4  -1   8  120.29   21.40
   4   1  -8  117.19    5.70
  -4   1   8  115.99    9.40
  -4   1   8  119.89    7.10
  -4   1   8  127.79    5.80
  -4   1   8  125.29    7.40
   4   1  -8  120.69    9.60
   4   1  -8  123.19    7.00
  -3  -1   8  154.78    8.40
  -3  -1   8  160.58   24.40
   3  -1  -8  151.28    6.10
  -3  -1   8  145.19    8.50
   3  -1  -8  172.78    7.20
  -3  -1   8  148.59   10.50
   3  -1  -8  148.39    7.90
  -3  -1   8  155.48    8.20
  -3  -1   8  148.79    7.20
  -3   1   8  141.39    7.30
   3   1  -8  144.29    6.70
  -3   1   8  153.68   24.70
  -3   1   8  145.19   10.60
   3   1  -8  153.38    7.90
  -3   1   8  150.18    8.30
  -3   1   8  161.58    8.40
  -3   1   8  146.49    6.60
   2  -1  -8  211.28    7.90
  -2  -1   8  218.68    9.90
  -2  -1   8  212.98    9.00
   2  -1  -8  206.48    8.60
   2  -1  -8  212.88    9.80
  -2  -1   8  211.18   13.20
  -2  -1   8  193.48   24.40
   2  -1  -8  203.88    9.40
  -2  -1   8  221.28   10.60
  -2  -1   8  219.78   10.30
   2  -1  -8  203.58    9.00
  -2   1   8  190.68   12.50
  -2   1   8  239.78    9.30
   2   1  -8  215.78    9.50
  -2   1   8  205.68    8.10
   2   1  -8  208.08    8.40
  -2   1   8  207.58    9.80
  -2   1   8  204.78   26.10
   1  -1  -8  842.02   27.10
   1  -1  -8  838.32   25.50
  -1  -1   8  805.32   28.20
   1  -1  -8  847.42   35.40
  -1  -1   8  829.32   28.70
   1  -1  -8  857.11   28.00
  -1  -1   8  844.72   26.80
  -1  -1   8  845.02   29.00
   1  -1  -8  756.42   28.00
  -1   1   8  808.42   27.80
   1   1  -8  829.22   27.30
   1   1  -8  888.31   34.30
   1   1  -8  822.82   25.10
   0  -1   8  616.54   22.90
   0  -1  -8  675.93   23.10
   0  -1  -8  664.43   22.70
   0  -1   8  645.94   21.20
   0  -1  -8  638.64   20.40
   0  -1  -8  665.03   22.00
   0  -1  -8  649.83   29.60
   0  -1   8  649.74   22.20
   0  -1  -8  686.33   23.90
   0   1  -8  641.34   20.10
   0   1  -8  627.44   22.20
   0   1  -8  643.04   27.80
   0   1   8  642.64   22.50
   0   1  -8  633.04   22.10
   0   1  -8  646.24   23.70
  -1  -1  -8  644.74   20.20
   1  -1   8  627.54   27.80
  -1  -1  -8  611.94   21.90
  -1  -1  -8  638.54   21.50
   1  -1   8  621.34   22.70
  -1  -1  -8  645.14   22.30
  -1  -1  -8  623.04   23.60
  -1   1  -8  635.74   19.90
  -1   1  -8  625.04   21.90
  -1   1  -8  646.24   21.20
   1   1   8  621.44   21.70
  -1   1  -8  647.54   22.20
  -1   1  -8  614.14   25.00
   1   1   8  645.54   28.70
  -2  -1  -8  945.31   30.80
   2  -1   8  934.41   30.80
  -2  -1  -8  873.91   41.70
   2  -1   8  905.01   30.50
  -2  -1  -8  890.71   31.80
  -2  -1  -8  924.31   28.40
  -2   1  -8  926.11   30.10
   2   1   8  886.61   30.50
  -2   1  -8  918.51   28.10
   2   1   8  954.20   39.20
  -2   1  -8  917.61   30.30
  -2   1  -8  913.91   32.20
  -2   1  -8  951.60   30.50
  -2   1  -8  935.81   42.50
  -3  -1  -8  263.27    9.60
  -3  -1  -8  257.87   10.70
  -3  -1  -8  280.27   11.60
   3  -1   8  245.48   11.40
  -3  -1  -8  253.77   12.30
   3  -1   8  236.08   10.80
  -3   1  -8  256.47    9.10
  -3   1  -8  261.07   12.50
  -3   1  -8  273.67   10.40
   3   1   8  251.47   11.60
  -3   1  -8  253.17   10.90
   3   1   8  256.47   17.20
  -4  -1  -8  128.89    6.20
   4  -1   8  120.79    6.70
  -4  -1  -8  130.29    5.30
  -4  -1  -8  124.69    6.60
   4  -1   8  123.89   10.60
  -4   1  -8  134.29    7.60
   4   1   8  121.89    6.80
  -4   1  -8  123.69    5.60
   4   1   8  115.89   10.30
  -4   1  -8  130.99    5.00
   4   1   8  132.19    7.50
  -4   1  -8  123.09    6.20
   5  -1   8   56.79    3.30
   5  -1   8   59.19    3.70
   5  -1   8   58.29    5.60
   5  -1   8   55.29    3.40
  -5  -1  -8   66.79    2.60
   5   1   8   57.69    3.80
   5   1   8   52.19    5.50
   5   1   8   62.29    3.60
  -7  -2   8   79.69    3.50
  -7  -2   8   75.29    2.90
   7  -2  -8   66.39    4.50
   7  -2  -8   60.79    4.30
   7   2  -8   72.49    3.90
   7   2  -8   63.39    4.50
   7   2  -8   72.79    4.00
  -7   2   8   74.19    4.50
   6  -2  -8   88.69    4.60
  -6  -2   8   82.59    5.40
  -6  -2   8   86.39    4.90
  -6  -2   8   86.79    4.40
  -6  -2   8   89.69    5.00
   6   2  -8   81.49    7.00
  -6   2   8   93.09    5.00
   6   2  -8   87.19    6.30
  -6   2   8   82.69    6.20
   6   2  -8   89.59    5.30
  -6   2   8   87.49    5.60
  -5  -2   8  204.18   13.20
  -5  -2   8  197.88    9.60
   5  -2  -8  202.88    8.40
  -5  -2   8  201.48   10.20
  -5   2   8  190.38   10.50
  -5   2   8  197.38    7.00
  -5   2   8  184.38   11.50
   5   2  -8  206.78   10.90
   5   2  -8  191.08   12.80
  -4  -2   8  191.98    8.40
  -4  -2   8  182.98   12.10
   4  -2  -8  180.08    8.10
  -4  -2   8  203.18    9.70
  -4  -2   8  180.98    9.40
  -4  -2   8  185.28   10.10
   4  -2  -8  185.18    9.50
  -4  -2   8  173.68   28.10
   4   2  -8  174.78   10.00
   4   2  -8  174.38    8.70
  -4   2   8  179.78    7.00
   4   2  -8  194.28   12.80
  -4   2   8  185.68    9.00
  -4   2   8  189.08   12.00
  -3  -2   8  204.58   26.90
  -3  -2   8  187.58   10.20
  -3  -2   8  211.58    9.90
   3  -2  -8  173.48   10.30
   3  -2  -8  189.88    9.30
   3  -2  -8  202.78    7.70
   3  -2  -8  196.88    8.40
   3  -2  -8  204.28    9.00
  -3  -2   8  210.78   13.80
  -3  -2   8  196.08    9.80
   3  -2  -8  179.68   21.40
  -3  -2   8  196.08    8.90
  -3   2   8  195.38    7.30
  -3   2   8  203.58    9.40
   3   2  -8  193.58    9.20
  -3   2   8  177.18   11.80
   3   2  -8  179.88    7.60
   3   2  -8  185.58    8.10
   2  -2  -8  248.28   11.30
   2  -2  -8  249.68    9.20
  -2  -2   8  246.48   10.60
   2  -2  -8  250.37   16.90
  -2  -2   8  265.47   11.80
   2  -2  -8  245.38    9.80
   2  -2  -8  250.77   11.10
   2  -2  -8  261.87   10.70
  -2  -2   8  255.87   11.60
  -2  -2   8  250.67   12.20
  -2   2   8  252.67   14.20
   2   2  -8  243.88   10.50
   2   2  -8  228.98    9.20
  -2   2   8  284.67   26.30
  -2   2   8  251.57   10.90
  -1  -2   8 2097.89   64.19
  -1  -2   8 2128.29   65.79
   1  -2  -8 2051.19   65.19
   1  -2  -8 2185.18   64.39
  -1  -2   8 2080.39   65.39
   1  -2  -8 2104.89   62.69
  -1  -2   8 2107.79   66.59
   1  -2  -8 2457.05   77.79
   1  -2  -8 2187.68   67.59
   1   2  -8 2033.40   65.79
  -1   2   8 2091.09   64.49
  -1   2   8 2256.47   70.49
   1   2  -8 2125.19   64.49
   0  -2   8  112.19    5.90
   0  -2   8  115.09    6.70
   0  -2   8  100.29    7.10
   0  -2  -8  106.09    6.30
   0  -2  -8  110.29    6.00
   0  -2  -8  110.89   10.70
   0  -2   8  114.19    7.10
   0  -2  -8  104.29    4.90
   0   2  -8  102.09    4.40
   0   2   8   95.89    5.90
   0   2  -8  105.29    6.10
   0   2  -8  113.39    7.20
   0   2   8  118.29    9.60
  -1  -2  -8  719.53   23.90
  -1  -2  -8  718.93   25.70
   1  -2   8  703.43   25.30
   1  -2   8  704.43   22.90
  -1  -2  -8  744.53   24.70
  -1  -2  -8  703.93   22.40
   1   2   8  721.43   31.60
  -1   2  -8  704.83   23.00
  -1   2  -8  695.43   21.80
  -1   2  -8  677.73   24.10
  -1   2  -8  716.23   25.90
  -2  -2  -8  458.15   16.00
   2  -2   8  434.86   16.90
   2  -2   8  395.56   15.80
  -2  -2  -8  434.36   16.50
  -2  -2  -8  430.06   17.50
  -2  -2  -8  441.86   14.40
  -2   2  -8  413.36   16.00
   2   2   8  380.26   18.10
  -2   2  -8  428.36   17.80
   2   2   8  424.46   23.20
   2   2   8  416.36   16.30
  -2   2  -8  421.16   13.70
  -3  -2  -8  112.99    5.30
   3  -2   8  104.19    6.30
  -3  -2  -8  111.99    6.20
  -3  -2  -8  116.19    6.70
   3  -2   8  106.89    6.40
   3   2   8  104.19   10.50
  -3   2  -8  108.49    5.50
   3   2   8  117.09    6.80
  -3   2  -8  109.69    6.40
  -3   2  -8  112.29    7.40
   4  -2   8  188.68    8.60
  -4  -2  -8  179.58    8.50
  -4  -2  -8  199.58    7.20
   4  -2   8  199.48   13.20
  -4  -2  -8  194.38    8.10
  -4   2  -8  181.48    8.10
   4   2   8  198.28   10.10
   4   2   8  185.48    8.80
  -4   2  -8  180.78    6.20
   4   2   8  191.78    9.30
  -4   2  -8  199.88    9.60
   4   2   8  186.48   13.20
   5  -2   8   51.39    3.20
   5  -2   8   51.79    3.20
  -5  -2  -8   50.39    2.80
  -5  -2  -8   59.09    2.50
   5  -2   8   56.69    5.40
   5   2   8   59.29    3.30
   5   2   8   56.69    3.50
   5   2   8   56.89    5.50
   7  -3  -8    2.40    0.90
   7  -3  -8    1.50    1.10
  -7  -3   8    2.60    0.60
   7   3  -8    1.10    0.90
   7   3  -8    0.30    0.90
   6  -3  -8   31.40    2.70
  -6  -3   8   29.90    2.90
   6  -3  -8   32.50    2.30
  -6  -3   8   35.70    2.90
  -6  -3   8   34.20    2.90
  -6  -3   8   28.70    3.10
   6   3  -8   31.30    4.10
   6   3  -8   31.40    3.20
  -6   3   8   34.90    3.80
  -6   3   8   35.10    3.50
   6   3  -8   33.50    4.50
   6   3  -8   37.20    3.60
  -5  -3   8  132.89    8.00
  -5  -3   8  134.69    7.20
   5  -3  -8  137.89    6.60
  -5  -3   8  134.99    7.50
  -5  -3   8  133.79    6.60
  -5   3   8  136.69    9.30
   5   3  -8  147.39    6.60
   5   3  -8  135.79   10.70
  -5   3   8  141.39    7.00
   5   3  -8  136.09    7.50
   5   3  -8  141.99    8.70
  -5   3   8  127.79    8.20
   5   3  -8  144.19    7.00
  -4  -3   8  522.75   19.50
  -4  -3   8  503.95   20.60
  -4  -3   8  507.75   19.70
  -4  -3   8  540.85   18.50
   4  -3  -8  522.95   18.20
   4  -3  -8  520.15   19.70
   4  -3  -8  510.15   16.80
  -4   3   8  501.55   20.00
   4   3  -8  530.55   18.60
  -4   3   8  523.85   18.70
   4   3  -8  493.75   17.80
   4   3  -8  525.05   18.00
   4   3  -8  566.04   25.10
   4   3  -8  523.35   20.60
  -4   3   8  515.65   22.80
  -3  -3   8  170.58   10.80
   3  -3  -8  134.99    8.50
   3  -3  -8  158.48    7.40
  -3  -3   8  155.98    7.80
   3  -3  -8  158.28   19.40
   3  -3  -8  148.79    8.30
  -3  -3   8  158.78    8.70
   3  -3  -8  148.09    7.70
   3  -3  -8  152.88    6.70
  -3  -3   8  147.39   10.60
  -3   3   8  141.39   10.20
   3   3  -8  147.59    7.60
   3   3  -8  147.59    6.90
   3   3  -8  154.28    8.90
   3   3  -8  150.98    7.20
   2  -3  -8  112.19    6.20
   2  -3  -8  100.79    6.40
   2  -3  -8  103.19    5.60
   2  -3  -8  117.19   12.00
  -2  -3   8  107.39    7.30
  -2  -3   8  107.79    6.90
  -2  -3   8  109.39    6.30
  -2  -3   8  100.09    6.80
   2  -3  -8  102.49    6.20
   2  -3  -8  103.29    5.10
  -2   3   8  159.88   19.50
   2   3  -8  125.89   17.40
   2   3  -8  104.19    6.00
  -2   3   8  101.79    6.10
   2   3  -8   99.49    4.90
  -2   3   8  104.79    8.40
   1  -3  -8   42.50    8.80
  -1  -3   8   34.60    4.20
   1  -3  -8   40.70    3.60
  -1  -3   8   41.40    4.50
   1  -3  -8   43.30    3.00
   1  -3  -8   43.50    4.00
  -1  -3   8   35.10    4.20
  -1  -3   8   41.80    4.00
   1   3  -8   39.10    3.90
  -1   3   8   40.70    5.00
  -1   3   8   80.39   18.90
   1   3  -8   38.20    3.50
  -1   3   8   36.50    4.10
  -1   3   8   32.80    3.50
   0  -3  -8  462.75   16.40
   0  -3  -8  432.36   24.20
   0  -3   8  438.66   17.40
   0  -3   8  443.36   16.50
   0  -3   8  451.35   17.80
   0  -3  -8  451.05   17.00
   0  -3  -8  430.76   14.90
   0  -3   8  448.46   18.40
   0   3  -8  445.16   17.90
   0   3   8  454.65   22.40
   0   3   8  457.35   39.30
   0   3   8  451.25   21.70
   0   3   8  445.36   18.30
   0   3  -8  441.86   16.40
   1  -3   8  723.23   26.20
  -1  -3  -8  750.72   25.00
   1  -3   8  700.73   24.70
   1  -3   8  670.63   27.60
  -1  -3  -8  748.43   24.20
   1   3   8  696.53   27.90
  -1   3  -8  692.33   25.90
   1   3   8  739.63   32.70
   1   3   8  677.23   52.39
   2  -3   8  267.67   12.30
  -2  -3  -8  270.47   11.20
  -2  -3  -8  275.47    9.90
  -2  -3  -8  269.07   11.70
   2  -3   8  263.47    9.70
  -2   3  -8  280.77   11.50
  -2   3  -8  263.37   12.80
   2   3   8  276.57   18.00
   2   3   8  258.17   14.10
   2   3   8  270.37   11.80
  -2   3  -8  250.17    8.70
  -3  -3  -8   22.60    2.20
   3  -3   8   23.20    2.90
  -3  -3  -8   22.20    2.70
  -3  -3  -8   20.40    2.60
   3  -3   8   18.00    3.00
   3   3   8   22.30    3.90
   3   3   8   19.50    3.20
  -3   3  -8   17.40    3.20
   3   3   8   19.50    5.80
   3   3   8   18.30    4.50
  -3   3  -8   19.20    2.60
  -4  -3  -8   79.59    3.70
  -4  -3  -8   76.39    4.80
  -4  -3  -8   75.19    4.40
   4  -3   8   78.69    4.90
   4   3   8   66.79    7.80
  -4   3  -8   75.59    4.40
   4   3   8   77.69    5.70
   4   3   8   75.89    5.90
   4   3   8   86.89    5.10
  -4   3  -8   73.49    5.30
   5  -3   8   17.60    1.60
   5  -3   8   15.00    2.70
  -5  -3  -8   17.70    1.30
   5   3   8   20.00    2.00
   5   3   8   13.10    3.10
   5   3   8   17.50    1.60
   7  -4  -8   36.50    3.10
  -7  -4   8   38.50    1.90
   7   4  -8   40.90    2.70
  -6  -4   8   73.29    3.80
  -6  -4   8   65.99    5.00
  -6  -4   8   71.99    4.00
   6  -4  -8   71.89    3.60
  -6  -4   8   74.49    4.40
   6   4  -8   70.29    5.30
  -6   4   8   67.99    5.20
   6   4  -8   77.69    6.80
  -6   4   8   73.09    3.60
  -6   4   8   78.19    4.90
   6   4  -8   77.69    4.70
  -5  -4   8   84.59    5.20
   5  -4  -8   89.89    5.00
  -5  -4   8   83.29    4.90
  -5  -4   8   81.99    5.90
   5   4  -8   82.59    6.30
  -5   4   8   91.09    7.10
   5   4  -8   83.59    8.50
  -5   4   8   85.59    4.80
   5   4  -8   84.09    4.70
   5   4  -8   90.59    5.50
  -5   4   8   86.19    6.20
   4  -4  -8  377.56   15.80
  -4  -4   8  391.76   15.30
  -4  -4   8  389.56   14.50
  -4  -4   8  384.76   15.80
   4  -4  -8  402.46   13.30
   4  -4  -8  387.26   14.60
  -4  -4   8  366.46   16.30
   4  -4  -8  392.76   14.40
  -4   4   8  387.56   18.20
  -4   4   8  387.36   16.70
   4   4  -8  367.86   20.00
   4   4  -8  384.96   14.10
   4   4  -8  388.56   14.20
  -4   4   8  361.66   14.00
  -4   4   8  374.16   15.80
   4   4  -8  391.86   16.60
   4   4  -8  385.96   14.20
   3  -4  -8  796.12   28.50
  -3  -4   8  817.22   28.30
   3  -4  -8  802.52   28.20
   3  -4  -8  868.31   31.10
   3  -4  -8  845.22   26.00
  -3  -4   8  842.12   29.10
  -3  -4   8  822.62   27.50
   3  -4  -8  801.82   26.70
  -3  -4   8  811.12   29.90
   3  -4  -8  801.72   48.60
  -3   4   8  790.12   31.30
   3   4  -8  833.42   26.60
   3   4  -8  852.71   27.00
  -3   4   8  791.22   26.50
   3   4  -8  804.12   26.50
   2  -4  -8  441.36   25.50
   2  -4  -8  432.86   17.10
   2  -4  -8  469.75   16.90
  -2  -4   8  470.15   19.10
  -2  -4   8  474.05   18.20
  -2  -4   8  421.86   19.80
   2  -4  -8  433.66   17.40
  -2   4   8  439.76   17.30
  -2   4   8  418.16   34.40
  -2   4   8  442.06   15.70
   2   4  -8  444.16   31.50
   2   4  -8  417.96   15.70
  -2   4   8  445.96   19.80
   1  -4  -8  837.72   26.50
  -1  -4   8  836.62   30.10
   1  -4  -8  800.82   25.70
  -1  -4   8  866.11   29.40
  -1  -4   8  846.42   27.80
   1  -4  -8  838.32   37.80
   1  -4  -8  856.81   27.60
   1  -4  -8  845.22   28.40
  -1  -4   8  812.92   28.70
  -1   4   8  836.02   53.69
  -1   4   8  803.72   30.70
   1   4  -8  709.03   27.00
  -1   4   8  818.22   33.40
  -1   4   8  843.02   29.40
   1   4  -8  810.32   27.10
   0  -4   8  273.17   13.60
   0  -4  -8  297.27   19.30
   0  -4  -8  279.57   11.70
   0  -4   8  286.57   13.30
   0  -4  -8  286.57   10.60
   0  -4  -8  291.07   12.40
   0   4   8  298.07   13.90
   0   4   8  293.37   13.50
   0   4   8  282.47   17.40
   0   4  -8  276.97   12.80
   0   4   8  336.47   31.30
   0   4   8  279.17   13.90
  -1  -4  -8  647.74   21.20
   1  -4   8  656.93   24.50
   1  -4   8  674.93   23.00
  -1  -4  -8  663.93   23.60
  -1  -4  -8  671.13   23.60
   1  -4   8  671.23   25.30
   1   4   8  698.93   31.40
   1   4   8  657.53   26.80
   1   4   8  644.14   50.39
  -1   4  -8  665.83   23.00
   1   4   8  654.83   24.60
  -1   4  -8  676.13   24.60
   1   4   8  692.83   25.70
   2  -4   8   11.80    2.00
  -2  -4  -8   12.70    1.90
  -2  -4  -8   10.20    2.10
   2  -4   8   11.70    3.00
  -2  -4  -8   11.10    2.40
  -2   4  -8    8.00    1.90
   2   4   8   13.90    3.10
   2   4   8    9.30    2.90
   2   4   8   10.50    2.90
   2   4   8   10.60    2.40
   2   4   8   17.10    5.00
   2   4   8    6.80    3.70
  -2   4  -8   11.00    2.70
  -3  -4  -8  322.17   11.40
   3  -4   8  355.66   13.80
  -3  -4  -8  337.67   12.80
  -3  -4  -8  342.77   13.40
   3   4   8  342.47   15.80
   3   4   8  343.87   15.30
   3   4   8  295.57   18.90
  -3   4  -8  311.17   12.70
   3   4   8  324.37   14.60
  -3   4  -8  336.77   14.40
   3   4   8  328.47   13.40
   4  -4   8  224.68    9.10
  -4  -4  -8  221.08    7.70
   4  -4   8  214.18    8.20
  -4  -4  -8  215.58    8.70
  -4  -4  -8  230.18    9.30
   4   4   8  220.98   10.30
   4   4   8  233.78    9.80
  -4   4  -8  232.78    8.90
   4   4   8  219.98    9.20
   4   4   8  182.48   13.00
   4   4   8  187.98   10.40
  -4   4  -8  220.58    9.90
   5  -4   8   10.10    2.30
  -5  -4  -8   13.50    1.00
   5   4   8    9.90    2.60
   5   4   8   12.20    1.40
  -6  -5   8   24.00    2.00
   6  -5  -8   22.80    2.00
  -6  -5   8   23.20    2.30
  -6  -5   8   22.40    1.90
   6   5  -8   25.10    2.70
   6   5  -8   25.30    4.10
   6   5  -8   23.60    1.70
   6   5  -8   19.50    4.40
  -6   5   8   24.00    2.60
  -6   5   8   12.80    3.30
  -5  -5   8   29.80    2.80
  -5  -5   8   28.10    3.20
  -5  -5   8   30.70    3.20
   5  -5  -8   32.80    2.90
  -5  -5   8   32.20    2.80
   5   5  -8   26.40    5.80
   5   5  -8   28.30    3.20
   5   5  -8   27.00    4.60
  -5   5   8   32.00    2.50
  -5   5   8   30.70    3.80
   5   5  -8   33.10    2.80
  -5   5   8   33.00    3.60
   4  -5  -8  254.87   10.90
  -4  -5   8  240.78   12.10
   4  -5  -8  260.17    9.70
  -4  -5   8  251.47   11.00
  -4  -5   8  257.17   11.60
  -4  -5   8  253.17   10.80
  -4   5   8  250.57   11.50
   4   5  -8  247.18   12.10
   4   5  -8  251.07    9.60
   4   5  -8  247.18   10.20
  -4   5   8  243.08    9.40
   4   5  -8  262.67   10.40
  -4   5   8  245.68   13.00
   3  -5  -8 1322.17   41.20
  -3  -5   8 1345.87   42.10
   3  -5  -8 1370.16   42.80
  -3  -5   8 1306.57   42.70
  -3  -5   8 1255.57   47.90
   3  -5  -8 1245.68   42.70
   3  -5  -8 1340.07   40.60
  -3  -5   8 1389.26   43.90
  -3   5   8 1375.86   45.20
   3   5  -8 1363.56   41.30
   3   5  -8 1324.67   41.30
   3   5  -8 1340.47   40.90
  -3   5   8 1327.87   45.60
  -2  -5   8  829.12   27.90
  -2  -5   8  828.92   28.70
  -2  -5   8  812.52   29.20
   2  -5  -8  804.52   26.60
   2  -5  -8  815.32   27.90
  -2  -5   8  820.42   30.10
   2  -5  -8  812.82   26.10
   2  -5  -8  823.32   28.90
   2   5  -8  827.22   27.00
  -2   5   8  833.72   30.60
   2   5  -8  817.22   46.90
  -2   5   8  838.42   28.40
   2   5  -8  823.72   26.80
  -2   5   8  852.81   31.20
  -1  -5   8   91.79    7.20
   1  -5  -8   85.59    5.00
   1  -5  -8   95.39    6.20
  -1  -5   8   90.29    7.10
   1  -5  -8  116.29   13.20
  -1  -5   8   90.79    6.10
   1  -5  -8   93.29    6.00
  -1  -5   8   92.29    6.70
  -1   5   8   95.09    7.00
   1   5  -8   80.39    5.30
  -1   5   8   88.79    6.60
   1   5  -8   94.29    5.50
  -1   5   8   94.29    9.10
   0  -5   8 1465.55   45.90
   0  -5   8 1440.56   48.40
   0  -5  -8 1462.75   46.10
   0  -5   8 1463.85   46.90
   0  -5  -8 1405.06   43.40
   0  -5  -8 1361.96   56.79
   0  -5  -8 1493.55   45.70
   0  -5   8 1479.85   47.90
   0   5  -8 1430.56   45.00
   0   5   8 1467.75   48.00
   0   5   8 1441.36   46.40
   0   5  -8 1426.76   44.40
   0   5  -8 1437.76   46.30
   0   5   8 1443.36   47.10
   0   5   8 1461.15   53.99
   0   5   8 1501.25   82.09
   1  -5   8  235.98   17.10
  -1  -5  -8  192.58    9.70
   1  -5   8  206.28    9.60
   1  -5   8  208.88   10.60
  -1  -5  -8  191.58    7.90
  -1  -5  -8  196.98    9.20
   1  -5   8  200.58   10.60
  -1   5  -8  182.18    9.90
   1   5   8  209.78   11.50
   1   5   8  207.78   11.90
   1   5   8  201.38   15.00
   1   5   8  224.58   14.20
   1   5   8  209.48   11.20
  -1   5  -8  206.48    9.30
   2  -5   8   14.30    3.20
   2  -5   8   17.40    4.60
  -2  -5  -8   20.70    2.20
  -2  -5  -8   20.00    3.10
   2  -5   8   20.10    2.90
  -2  -5  -8   20.80    2.60
   2   5   8   20.20    3.00
   2   5   8   18.90    4.70
   2   5   8   12.80    6.20
   2   5   8   21.50    4.00
  -2   5  -8   20.30    3.60
  -2   5  -8   21.00    3.70
   2   5   8   17.90    3.80
  -3  -5  -8  224.38    8.20
   3  -5   8  222.48   10.20
  -3  -5  -8  226.38    9.30
  -3  -5  -8  232.28   10.60
   3   5   8  218.08   11.20
  -3   5  -8  226.18    9.50
  -3   5  -8  214.28   10.40
   3   5   8  212.58    9.80
   3   5   8  235.38   12.70
   3   5   8  228.68   15.10
   3   5   8  223.08   10.90
  -4  -5  -8   38.30    2.60
  -4  -5  -8   37.60    2.20
  -4  -5  -8   34.00    3.40
   4  -5   8   35.10    2.80
   4   5   8   35.40    5.30
   4   5   8   36.30    3.70
   4   5   8   32.00    2.90
  -4   5  -8   33.20    3.00
  -4   5  -8   35.30    2.90
  -6  -6   8   78.99    3.40
   6  -6  -8   76.09    3.50
  -6   6   8   91.49    5.80
   6   6  -8   79.89    4.20
   6   6  -8   64.29    5.80
  -5  -6   8   10.20    2.10
  -5  -6   8   13.90    2.20
  -5  -6   8   11.50    2.10
   5  -6  -8   16.10    2.20
  -5  -6   8   13.50    2.00
  -5   6   8   13.70    2.70
   5   6  -8   14.60    4.30
   5   6  -8   16.90    2.40
   5   6  -8   11.90    2.50
  -5   6   8   10.10    2.30
   5   6  -8   15.10    2.70
   4  -6  -8   94.49    6.60
   4  -6  -8   89.59    4.80
  -4  -6   8   88.19    5.20
  -4  -6   8   88.69    5.50
   4  -6  -8   93.79    5.30
   4  -6  -8   93.59    5.80
  -4  -6   8   93.39    6.40
  -4   6   8   95.39    6.10
   4   6  -8   91.69    5.50
  -4   6   8   85.89    6.40
   4   6  -8   96.29    9.30
   4   6  -8   90.19    5.20
  -4   6   8   93.09    6.40
   4   6  -8   90.99    5.10
   3  -6  -8  520.75   20.20
   3  -6  -8  492.05   18.00
   3  -6  -8  518.25   19.50
  -3  -6   8  513.35   20.20
  -3  -6   8  528.95   21.30
   3  -6  -8  515.85   17.60
  -3  -6   8  519.65   18.80
   3   6  -8  538.85   25.20
   3   6  -8  535.15   18.40
   3   6  -8  536.85   21.20
  -3   6   8  544.65   20.20
  -3   6   8  540.05   20.90
  -3   6   8  510.25   21.30
   3   6  -8  489.25   20.10
  -2  -6   8  247.58   12.70
  -2  -6   8  255.87   11.10
   2  -6  -8  255.87   11.30
   2  -6  -8  244.38    9.60
   2  -6  -8  230.68   10.00
  -2  -6   8  228.58   11.20
   2  -6  -8  233.78   11.90
  -2  -6   8  265.37   12.30
   2   6  -8  256.27    9.70
   2   6  -8  261.07   10.50
  -2   6   8  251.27   13.40
  -2   6   8  240.88   11.80
  -2   6   8  241.38   11.20
   1  -6  -8  156.88    7.40
  -1  -6   8  163.78    8.70
   1  -6  -8  170.08    7.10
  -1  -6   8  161.08   10.10
  -1  -6   8  162.08    9.10
   1  -6  -8  170.68    8.90
  -1  -6   8  178.58    9.90
   1  -6  -8  177.78    8.60
   1   6  -8  165.58    7.80
  -1   6   8  174.18    8.60
   1   6  -8  167.08    7.70
  -1   6   8  173.68   12.60
  -1   6   8  170.78    9.50
  -1   6   8  175.38   11.00
   0  -6   8  290.47   13.10
   0  -6   8  271.27   13.20
   0  -6   8  258.47   14.80
   0  -6  -8  276.67   11.70
   0  -6  -8  277.97   10.70
   0  -6  -8  276.27   10.30
   0  -6   8  280.47   12.30
   0  -6  -8  330.57   17.30
   0   6   8  283.77   14.80
   0   6  -8  280.97   11.30
   0   6   8  275.47   12.90
   0   6   8  282.47   17.60
   0   6  -8  270.67   11.10
   0   6   8  289.37   13.80
   0   6  -8  277.87   11.90
   1  -6   8  290.97   13.30
  -1  -6  -8  291.17   10.50
  -1  -6  -8  305.47   12.50
   1  -6   8  287.57   13.20
  -1  -6  -8  287.37   11.80
   1  -6   8  307.47   14.30
   1  -6   8  295.57   12.40
   1   6   8  293.67   14.00
  -1   6  -8  267.37   11.10
   1   6   8  279.87   13.70
  -1   6  -8  304.47   11.90
   1   6   8  295.47   14.70
   1   6   8  280.07   18.00
   2  -6   8   36.70    3.60
  -2  -6  -8   38.40    3.40
   2  -6   8   38.50    4.40
   2  -6   8   38.40    3.30
  -2  -6  -8   37.90    2.60
   2   6   8   36.30    6.40
   2   6   8   37.70    4.40
  -2   6  -8   34.70    3.50
  -2   6  -8   39.80    3.50
   2   6   8   34.50    4.30
   2   6   8   33.10    3.90
   3  -6   8   88.09    5.60
  -3  -6  -8   89.09    5.10
  -3  -6  -8   88.69    4.00
  -3  -6  -8   89.19    4.80
   3   6   8   82.29    8.40
   3   6   8   89.89    6.40
   3   6   8  101.19    6.20
  -3   6  -8   88.29    4.90
  -3   6  -8   80.19    5.20
   4  -6   8  181.98    6.60
  -4  -6  -8  184.58    6.00
   4  -6   8  170.38    7.10
   4   6   8  173.38   10.20
  -4   6  -8  183.18    6.80
   4   6   8  155.78    7.60
   4   6   8  167.78    6.70
  -6  -7   8  101.39    4.20
  -6   7   8  136.89    5.60
  -5  -7   8  308.17   11.30
   5  -7  -8  307.77   10.90
  -5  -7   8  301.57   10.50
  -5   7   8  274.07   11.00
   5   7  -8  287.37   10.60
  -5   7   8  288.17   11.20
   5   7  -8  319.17   16.10
   5   7  -8  303.07   10.90
  -4  -7   8   90.69    4.90
  -4  -7   8   87.09    5.40
   4  -7  -8   95.09    4.70
  -4  -7   8   91.29    6.00
   4  -7  -8   90.39    5.00
   4  -7  -8   79.89    8.70
   4  -7  -8   87.29    5.40
  -4  -7   8   94.69    4.90
  -4   7   8   83.09    5.10
   4   7  -8   87.89    5.00
  -4   7   8   85.19    5.30
   4   7  -8   82.49    8.30
   4   7  -8   91.39    5.10
   4   7  -8   93.89    5.00
  -4   7   8   96.59    5.70
   3  -7  -8   73.49    4.60
   3  -7  -8   74.89    5.60
  -3  -7   8   68.39    5.40
   3  -7  -8   72.79    5.80
  -3  -7   8   72.39    4.90
  -3  -7   8   81.99    6.10
  -3  -7   8   81.19    5.20
   3  -7  -8   76.59    4.30
   3   7  -8   71.59    7.70
  -3   7   8   72.59    4.90
   3   7  -8   64.99    4.40
   3   7  -8   68.19    4.60
  -3   7   8   75.99    5.30
   3   7  -8   70.89    4.60
  -3   7   8   67.39    5.70
  -2  -7   8  148.39    7.80
   2  -7  -8  146.19    8.60
  -2  -7   8  154.28    9.20
   2  -7  -8  144.09    7.90
  -2  -7   8  150.28    8.00
  -2  -7   8  146.59    8.50
   2  -7  -8  143.09    6.80
  -2   7   8  144.49    6.70
   2   7  -8  150.58    6.20
  -2   7   8  145.09   10.00
  -2   7   8  147.99    7.70
   2   7  -8  147.49   11.20
  -2   7   8  141.39    7.70
   2   7  -8  141.29    7.10
   1  -7  -8   87.29    6.00
   1  -7  -8   88.69    5.60
  -1  -7   8   83.49    5.90
   1  -7  -8   83.49    4.70
  -1  -7   8   89.79    6.80
  -1  -7   8   85.09    6.80
   1   7  -8   82.09    5.90
  -1   7   8   85.89    7.40
  -1   7   8   85.29    7.10
   0  -7   8  381.16   17.70
   0  -7  -8  359.46   13.00
   0  -7  -8  397.26   14.50
   0  -7  -8  379.26   15.00
   0  -7   8  378.66   16.10
   0  -7  -8  368.96   12.80
   0  -7   8  370.46   16.80
   0   7   8  365.26   12.30
   0   7   8  313.57   17.40
   0   7  -8  364.16   13.70
   0   7   8  364.56   15.40
   0   7  -8  408.26   15.00
   0   7   8  368.16   20.40
  -1  -7  -8  158.08    7.20
  -1  -7  -8  183.28    8.80
   1  -7   8  188.48   10.50
  -1  -7  -8  184.98    7.30
   1  -7   8  193.88    9.00
   1  -7   8  180.98    9.60
  -1  -7  -8  192.28    8.80
   1  -7   8  188.38   10.50
  -1   7  -8  189.18    8.10
   1   7   8  199.48   10.80
   1   7   8  188.88   10.30
  -1   7  -8  187.58    8.00
  -1   7  -8  181.38    8.40
   1   7   8  178.68   13.50
   1   7   8  184.48    9.90
  -2  -7  -8   47.30    3.40
   2  -7   8   54.29    3.70
  -2  -7  -8   52.99    2.90
  -2  -7  -8   53.89    3.90
   2  -7   8   46.30    3.90
   2  -7   8   45.30    4.30
   2   7   8   48.60    6.80
   2   7   8   45.50    4.40
  -2   7  -8   53.09    3.60
  -2   7  -8   47.10    3.00
   2   7   8   47.60    4.50
   2   7   8   44.10    4.50
  -2   7  -8   44.50    3.50
   3  -7   8   12.80    2.30
  -3  -7  -8   13.60    1.40
  -3  -7  -8   11.00    1.70
  -3  -7  -8   10.30    1.90
  -3   7  -8   16.30    2.00
   3   7   8    9.60    2.40
   3   7   8   12.00    2.10
   3   7   8    8.90    3.90
  -3   7  -8   16.80    1.90
   4   7   8   99.59    6.70
  -4   7  -8  140.39    4.80
  -5  -8   8    2.50    1.00
  -5  -8   8    2.30    0.70
   5   8  -8    3.80    2.30
  -5   8   8    3.90    0.90
   5   8  -8    4.20    1.00
  -4  -8   8   35.40    4.20
  -4  -8   8   42.30    2.90
   4  -8  -8   33.90    3.30
   4  -8  -8   39.90    2.90
   4   8  -8   41.50    5.40
   4   8  -8   39.20    2.80
   4   8  -8   39.20    2.90
  -4   8   8   35.70    2.80
   3  -8  -8    7.00    1.50
   3  -8  -8    7.60    2.10
   3  -8  -8    2.10    1.70
  -3  -8   8    8.60    2.10
  -3  -8   8    7.80    1.80
  -3  -8   8    7.10    1.80
   3  -8  -8    7.10    1.60
  -3  -8   8    9.90    1.70
  -3   8   8    8.30    1.80
  -3   8   8    6.80    2.00
   3   8  -8    5.30    2.80
   3   8  -8    6.60    1.70
   3   8  -8    8.40    1.80
  -2  -8   8   14.60    2.50
   2  -8  -8   15.50    2.00
   2  -8  -8   10.00    2.10
   2  -8  -8   14.90    2.80
  -2  -8   8   10.80    2.80
  -2  -8   8   14.30    2.50
  -2  -8   8   12.80    2.70
   2  -8  -8   11.90    2.00
  -2   8   8   11.80    3.00
   2   8  -8   13.60    3.80
  -2   8   8   13.80    1.90
   2   8  -8   11.80    2.10
   1  -8  -8  283.37   12.40
   1  -8  -8  267.67   11.90
  -1  -8   8  265.57   12.80
  -1  -8   8  268.67   11.40
   1  -8  -8  247.98    9.60
  -1  -8   8  271.17   14.90
  -1  -8   8  257.47   11.10
   1  -8  -8  250.97    9.80
   1   8  -8  255.87   14.00
  -1   8   8  250.17   11.70
  -1   8   8  273.27   13.60
   1   8  -8  260.27   10.50
   1   8  -8  262.77    9.00
   0  -8   8  210.18   11.10
   0  -8   8  205.68    9.80
   0  -8   8  212.08   10.50
   0  -8  -8  208.38    9.20
   0  -8  -8  207.88    9.50
   0  -8   8  214.18    9.60
   0  -8  -8  207.78    7.90
   0  -8  -8  196.28    9.10
   0   8   8  206.78   10.40
   0   8  -8  198.48   11.10
   0   8  -8  203.18    7.90
   0   8   8  204.08   11.40
   0   8   8  202.38   13.90
   0   8  -8  203.28    8.60
   1  -8   8   14.60    2.50
   1  -8   8   19.10    3.10
   1  -8   8   14.80    2.80
  -1  -8  -8   13.10    2.30
  -1  -8  -8   18.90    2.20
   1  -8   8   12.40    3.00
  -1   8  -8   14.20    1.80
   1   8   8    9.20    2.20
   1   8   8   16.50    3.30
   1   8   8   12.80    4.30
  -1   8  -8   17.20    1.90
   2  -8   8    7.40    1.60
  -2  -8  -8    5.50    1.40
  -2  -8  -8    8.00    1.20
   2  -8   8    9.20    2.20
   2   8   8    5.10    1.50
  -2   8  -8    6.80    1.40
   2   8   8    6.90    2.10
   2   8   8    6.00    3.30
  -2   8  -8    5.90    1.20
   3  -8   8  153.48    6.60
   3   8   8  121.29    8.40
   3   8   8  161.88    6.40
  -4  -9   8   79.69    3.50
   4  -9  -8   69.29    4.00
  -4  -9   8   75.59    4.20
   4   9  -8   87.39    4.00
   4   9  -8   73.49    3.60
   4   9  -8   69.09    6.50
  -3  -9   8   26.50    2.50
   3  -9  -8   29.80    2.50
  -3  -9   8   29.30    2.90
   3  -9  -8   26.60    2.30
   3  -9  -8   25.40    2.90
  -3  -9   8   24.60    2.80
  -3   9   8   27.30    2.90
   3   9  -8   32.80    2.60
   3   9  -8   26.80    4.00
   3   9  -8   29.90    2.40
  -2  -9   8   31.80    2.90
   2  -9  -8   31.10    2.80
   2  -9  -8   34.50    2.60
  -2  -9   8   30.80    3.50
  -2  -9   8   35.80    3.20
   2  -9  -8   29.00    3.20
   2  -9  -8   27.80    3.10
  -2  -9   8   28.90    3.30
  -2   9   8   28.60    6.30
   2   9  -8   38.10    3.00
   2   9  -8   32.70    4.40
   2   9  -8   34.50    2.70
   1  -9  -8   12.80    2.30
  -1  -9   8   16.30    2.90
  -1  -9   8   16.40    2.60
   1  -9  -8   15.40    2.10
   1  -9  -8   18.10    3.30
   1  -9  -8   16.10    2.70
  -1  -9   8   20.60    2.90
  -1  -9   8   18.20    3.10
   1   9  -8   21.40    3.90
  -1   9   8   17.30    3.40
   1   9  -8   18.20    2.00
   0  -9  -8   45.40    3.60
   0  -9   8   47.80    4.40
   0  -9   8   50.59    4.00
   0  -9   8   41.20    4.00
   0  -9   8   44.90    3.70
   0  -9  -8   43.50    2.70
   0  -9  -8   46.10    3.40
   0   9   8   40.50    4.00
   0   9   8   39.20    4.30
   0   9  -8   40.80    3.00
   1  -9   8    1.20    1.10
  -1  -9  -8    0.30    0.90
   1  -9   8    1.30    1.30
  -1  -9  -8    1.50    0.80
  -1  -9  -8    0.80    0.70
   1  -9   8    0.90    1.00
   1   9   8    1.50    1.20
   1   9   8    1.70    1.40
  -1   9  -8   -0.10    0.60
  -1   9  -8    0.20    0.40
   2  -9   8   58.39    3.60
   2  -9   8   54.19    2.70
   2   9   8   59.29    3.80
  -2   9  -8   52.19    2.30
   2   9   8   64.89    6.40
   3 -10  -8   51.79    3.10
  -3 -10   8   46.80    2.60
   3  10  -8   48.30    2.60
   3  10  -8   56.19    3.20
  -3  10   8   49.10    3.80
  -2 -10   8   11.10    1.60
  -2 -10   8    9.50    1.90
   2 -10  -8    8.20    1.70
   2 -10  -8    9.00    1.40
  -2  10   8   10.30    2.10
   2  10  -8    9.90    1.30
   2  10  -8   12.40    1.80
   1 -10  -8   -0.20    0.90
  -1 -10   8    1.60    1.30
  -1 -10   8    1.20    1.00
   1 -10  -8    1.70    0.80
  -1  10   8    1.80    1.30
   1  10  -8    1.80    0.90
   1  10  -8    2.70    1.00
   0 -10   8   76.29    4.10
   0 -10   8   70.59    4.40
   0 -10  -8   72.29    4.00
   0 -10   8   75.89    4.00
   0 -10  -8   75.39    3.40
   0  10  -8   73.39    3.50
   0  10   8   67.49    4.70
   1 -10   8   86.69    4.10
   1  10   8   70.49    4.10
   2 -11  -8   63.69    3.10
   2  11  -8   63.19    2.70
   1 -11  -8   26.70    1.70
  -1  11   8   21.90    2.30
   1  11  -8   23.30    1.90
   0  11   8   53.29    3.20
   7   0  -9    8.80    1.70
   7   0  -9    7.30    1.30
  -7   0   9    7.90    1.20
  -6   0   9  140.99    8.10
   6   0  -9  106.89    6.60
   6   0  -9  110.19    5.50
  -6   0   9  100.99    6.80
  -6   0   9  107.49    4.20
  -5   0   9  118.19    5.20
  -5   0   9  107.49    7.20
  -5   0   9  118.19    6.60
   5   0  -9  121.29    6.90
  -5   0   9  111.59    8.50
  -5   0   9  110.49    5.70
  -4   0   9    4.30    1.70
  -4   0   9    3.50    1.70
  -4   0   9    2.00    1.10
   4   0  -9    4.40    1.30
   4   0  -9    5.00    2.30
  -4   0   9    3.00    2.00
   4   0  -9    4.00    1.70
  -4   0   9    5.90    2.60
  -3   0   9   28.80    2.70
  -3   0   9   28.80    3.80
  -3   0   9   23.30   17.90
   3   0  -9   31.00    2.90
  -3   0   9   35.10    3.90
  -3   0   9   22.80    5.20
   3   0  -9   31.40    3.50
  -2   0   9  174.78   31.40
  -2   0   9  193.38   13.00
  -2   0   9  197.58    8.30
  -2   0   9  207.48    9.00
   2   0  -9  199.58    7.30
   1   0  -9   93.49    5.30
   1   0  -9   91.49    4.30
   1   0  -9   95.79    5.90
  -1   0   9   90.09    4.50
  -1   0   9   97.49    6.30
   1   0  -9   94.59   10.60
   0   0  -9  110.79    7.30
   0   0  -9  111.99   11.70
   0   0  -9  108.89    6.50
   0   0  -9  109.29    6.50
   0   0  -9  111.39    5.80
  -1   0  -9 1002.10   30.30
  -1   0  -9 1020.20   34.50
  -1   0  -9  996.70   32.70
   1   0   9  988.40   32.50
  -1   0  -9  955.50   32.20
  -1   0  -9  953.10   40.80
   1   0   9  996.10   38.70
  -1   0  -9 1023.00   31.90
  -2   0  -9  219.88   10.10
   2   0   9  221.38   14.70
  -2   0  -9  186.88   11.50
  -2   0  -9  215.68    9.20
  -2   0  -9  213.78   10.20
  -2   0  -9  226.18    8.20
  -3   0  -9    8.40    1.60
  -3   0  -9    9.80    1.40
  -3   0  -9    5.80    1.90
  -3   0  -9    4.50    1.70
   3   0   9   15.00    4.30
   3   0   9   14.30    2.50
   4   0   9  219.18    9.40
  -4   0  -9  216.58    7.00
   4   0   9  222.88   12.60
   4   0   9  184.38    8.80
   7  -1  -9   10.10    1.90
  -7  -1   9    9.80    1.30
  -7   1   9    7.60    1.40
   7   1  -9    8.50    1.70
  -6  -1   9   23.90    2.20
  -6  -1   9   26.50    1.90
  -6  -1   9   29.80    2.70
   6  -1  -9   22.60    3.10
   6  -1  -9   27.00    2.50
   6   1  -9   24.50    3.10
   6   1  -9   28.80    3.00
  -6   1   9   32.60    3.60
   6   1  -9   27.10    2.80
  -6   1   9   27.40    2.60
  -5  -1   9   34.10    3.60
  -5  -1   9   37.70    2.90
  -5  -1   9   39.40    3.60
   5  -1  -9   33.70    3.70
   5  -1  -9   35.80    2.70
  -5  -1   9   33.50    3.20
  -5  -1   9   43.20    6.70
  -5   1   9   44.70    5.10
  -5   1   9   38.30    3.60
  -5   1   9   43.90    4.50
   5   1  -9   40.40    5.10
  -5   1   9   35.90    2.20
   5   1  -9   38.80    3.60
   5   1  -9   32.10    3.80
  -4  -1   9  219.78   10.40
   4  -1  -9  206.58   10.10
  -4  -1   9  205.98   10.50
  -4  -1   9  225.68   13.30
  -4  -1   9  224.48    9.00
   4  -1  -9  205.98    8.70
  -4  -1   9  203.18    9.70
   4   1  -9  217.68   10.00
   4   1  -9  253.37   10.00
   4   1  -9  197.18   12.60
  -4   1   9  211.38    8.00
  -4   1   9  206.28   13.00
  -4   1   9  211.38   10.00
  -3  -1   9    3.60    2.00
  -3  -1   9   24.20   17.10
   3  -1  -9    4.00    1.50
   3  -1  -9    4.90    2.10
  -3  -1   9    3.70    1.40
  -3  -1   9    1.30    1.60
  -3  -1   9    3.80    1.80
  -3  -1   9    9.50    3.10
  -3   1   9    2.60    2.40
   3   1  -9    3.90    1.30
  -3   1   9    3.40    1.90
   3   1  -9    3.50    1.80
  -3   1   9    2.50    1.20
  -2  -1   9   71.09    7.50
  -2  -1   9   71.79    5.50
  -2  -1   9   93.09   19.00
  -2  -1   9   70.09    5.00
  -2  -1   9   69.69    5.70
  -2  -1   9   62.89    5.30
   2  -1  -9   72.69    4.70
   2  -1  -9   71.89    4.50
  -2   1   9   67.49    3.70
  -2   1   9  107.59   16.60
   2   1  -9   80.79    6.60
  -2   1   9   66.79    7.20
  -2   1   9   63.99    6.40
   1  -1  -9  477.85   17.90
   1  -1  -9  476.75   17.10
  -1  -1   9  482.65   17.30
  -1  -1   9  483.95   16.40
   1  -1  -9  480.75   15.80
   1  -1  -9  472.35   25.20
   1  -1  -9  482.25   17.70
  -1  -1   9  464.45   23.30
   1   1  -9  471.85   15.00
  -1   1   9  454.35   22.10
   1   1  -9  483.65   17.70
  -1   1   9  466.55   17.80
   0  -1   9   11.60    1.90
   0  -1  -9   13.10    2.70
   0  -1  -9   13.50    1.90
   0  -1  -9   11.50    2.20
   0  -1   9   10.90    2.80
   0  -1  -9   11.10    2.50
   0  -1  -9   10.60    5.10
   0   1  -9   14.40    3.40
   0   1  -9   15.80    3.70
   0   1  -9   14.80    2.40
  -1  -1  -9  251.47   11.10
  -1  -1  -9  251.77   10.50
  -1  -1  -9  204.38   17.40
  -1  -1  -9  238.68   10.70
   1  -1   9  263.57   11.60
  -1  -1  -9  254.97   12.20
  -1  -1  -9  252.27    9.20
   1   1   9  252.37   10.40
   1   1   9  257.97   15.80
  -1   1  -9  251.97    8.90
  -1   1  -9  248.28   10.80
  -1   1  -9  245.78    9.90
  -1   1  -9  235.08   12.10
  -2  -1  -9  203.48   10.80
   2  -1   9  228.48   11.20
   2  -1   9  222.18   14.40
  -2  -1  -9  209.38    8.10
  -2  -1  -9  212.48    9.20
  -2  -1  -9  202.88    9.80
  -2   1  -9  207.78    9.50
  -2   1  -9  216.28    8.80
  -2   1  -9  210.88    7.70
  -2   1  -9  186.68   11.40
   2   1   9  220.28   14.70
   3  -1   9   91.99    5.60
  -3  -1  -9   89.19    6.30
  -3  -1  -9  100.49    5.20
  -3  -1  -9   84.19    5.40
  -3  -1  -9   91.69    4.30
   3  -1   9   90.09    8.70
   3   1   9   87.49    8.80
  -3   1  -9   89.59    4.60
  -3   1  -9  102.29    4.00
  -3   1  -9   91.69    6.20
   3   1   9   90.49    5.30
  -3   1  -9   93.09    5.30
  -4  -1  -9   21.90    2.00
   4  -1   9   24.60    2.20
  -4  -1  -9   26.80    1.80
   4  -1   9   24.10    4.10
   4   1   9   23.50    2.80
   4   1   9   22.90    4.10
   4   1   9   27.10    3.10
   4   1   9   26.70    2.40
   7  -2  -9   53.49    3.50
  -7  -2   9   60.39    2.50
   7  -2  -9   53.09    3.30
   7   2  -9   57.39    3.10
  -6  -2   9    1.80    1.10
   6  -2  -9    2.90    1.20
  -6  -2   9    2.30    1.10
  -6  -2   9    3.90    1.00
  -6   2   9    4.60    1.70
  -6   2   9    4.60    1.80
   6   2  -9    2.30    1.30
  -6   2   9    3.40    1.20
   6   2  -9    2.00    1.50
   6   2  -9    2.00    1.50
  -5  -2   9   36.20    3.40
  -5  -2   9   29.60    3.50
   5  -2  -9   37.20    2.80
  -5  -2   9   32.10    3.40
   5  -2  -9   34.50    3.70
  -5  -2   9   34.60    2.90
   5   2  -9   35.80    3.30
  -5   2   9   35.20    4.60
   5   2  -9   34.80    4.80
  -5   2   9   35.50    3.30
   5   2  -9   34.20    3.80
  -5   2   9   33.20    4.00
  -4  -2   9  237.58   13.80
  -4  -2   9  242.68   10.80
   4  -2  -9  229.08    9.50
  -4  -2   9  235.28    9.70
  -4  -2   9  250.77   11.10
  -4  -2   9  228.18   11.30
   4  -2  -9  232.98   10.90
   4   2  -9  222.18   13.90
   4   2  -9  224.88   12.20
   4   2  -9  242.68   10.60
  -4   2   9  232.28   10.40
  -4   2   9  237.68   13.90
  -3  -2   9   83.19    6.00
  -3  -2   9   84.49    5.90
  -3  -2   9  160.08   37.20
   3  -2  -9   82.09    4.10
   3  -2  -9   73.99    5.50
   3  -2  -9   78.49    4.90
  -3  -2   9   83.09    5.10
  -3  -2   9   84.39    7.90
  -3  -2   9   75.59    6.00
  -3   2   9   81.29    5.50
   3   2  -9   85.89    5.60
   3   2  -9   82.79    4.40
  -3   2   9   70.19    7.20
  -2  -2   9  291.37   11.70
   2  -2  -9  287.07   11.80
  -2  -2   9  293.67   13.50
   2  -2  -9  295.57   10.60
   2  -2  -9  294.77   11.30
  -2  -2   9  291.17   13.10
   2  -2  -9  289.97   12.60
   2  -2  -9  300.67   12.80
  -2  -2   9  306.17   12.80
  -2  -2   9  278.77   16.30
  -2  -2   9  269.37   31.30
   2   2  -9  291.37   12.10
  -2   2   9  333.17   28.70
  -2   2   9  266.77   15.50
   2   2  -9  280.67   10.80
  -2   2   9  297.77   12.30
   1  -2  -9  497.45   18.80
  -1  -2   9  511.75   17.80
   1  -2  -9  464.75   25.90
   1  -2  -9  506.45   16.40
   1  -2  -9  508.65   18.00
  -1  -2   9  497.85   18.50
  -1  -2   9  471.65   19.50
  -1  -2   9  470.15   19.00
   1  -2  -9  458.55   17.90
  -1   2   9  548.45   23.00
  -1   2   9  498.25   22.80
   1   2  -9  499.15   18.20
  -1   2   9  536.35   40.80
  -1   2   9  483.65   19.20
   0  -2   9  387.36   15.10
   0  -2  -9  407.56   13.80
   0  -2   9  411.26   14.50
   0  -2  -9  417.96   15.40
   0  -2  -9  409.06   16.00
   0  -2  -9  407.16   25.90
   0  -2   9  414.36   16.60
   0   2   9  403.26   19.60
   0   2  -9  392.06   15.40
   0   2  -9  399.46   16.90
  -1  -2  -9   63.19    4.40
  -1  -2  -9   57.89    3.50
  -1  -2  -9   58.19    4.70
   1  -2   9   54.79    5.00
  -1  -2  -9   58.89    5.30
  -1   2  -9   53.79    4.50
   1   2   9   62.79    7.70
  -1   2  -9   55.59    2.80
  -1   2  -9   58.09    5.20
   2  -2   9  131.09   10.70
  -2  -2  -9  146.79    7.20
  -2  -2  -9  138.79    7.60
  -2  -2  -9  140.99    6.10
  -2  -2  -9  147.89    8.50
  -2   2  -9  147.19    5.50
  -2   2  -9  139.59    8.40
   3  -2   9  137.89   10.40
  -3  -2  -9  134.99    7.00
  -3  -2  -9  132.09    6.50
  -3  -2  -9  141.79    5.60
   3  -2   9  136.29    6.50
   3  -2   9  138.49    6.70
   3   2   9  133.19   11.00
   3   2   9  128.89    6.70
  -3   2  -9  140.69    5.20
  -3   2  -9  133.39    6.60
   3   2   9  134.39    8.00
   3   2   9  121.09    6.90
  -3   2  -9  135.29    7.80
   4  -2   9   50.69    3.10
   4  -2   9   38.10    4.80
  -4  -2  -9   50.69    2.80
  -4  -2  -9   47.10    3.00
   4   2   9   52.99    5.70
   4   2   9   53.79    3.20
  -4   2  -9   53.89    3.20
   4   2   9   45.20    3.90
   4   2   9   53.39    4.10
   6  -3  -9   16.20    2.00
  -6  -3   9   23.20    2.30
  -6  -3   9   22.40    1.90
  -6  -3   9   20.80    2.10
   6   3  -9   15.80    2.30
  -6   3   9   12.00    2.80
  -6   3   9   19.70    2.20
   6   3  -9   21.60    3.30
  -6   3   9   22.30    2.60
   6   3  -9   19.80    2.70
  -5  -3   9  171.78    8.30
  -5  -3   9  177.78    8.10
  -5  -3   9  159.78    8.60
  -5  -3   9  179.28    7.40
   5  -3  -9  173.28    7.20
   5   3  -9  163.68    8.90
   5   3  -9  177.48    7.70
  -5   3   9  167.28    9.10
  -5   3   9  171.88    7.50
   5   3  -9  159.98   11.20
  -5   3   9  167.38   10.00
  -4  -3   9  145.49    7.50
   4  -3  -9  149.19    8.60
[truncated: 61,599 more chars]
