# Supplementary material for: Immunosuppressive Sesquiterpenoids from the Edible Mushroom Craterellus odoratus
Source: J Fungi (Basel). 2021 Dec 8;7(12):1052. doi: 10.3390/jof7121052 (PMC8707212; doi:10.3390/jof7121052)
Supplement: Supplementary file 1 [file jof-07-01052-s001.zip › compound 5_0m.cif]

data_global
_audit_creation_method                  'APEX3 v2018.1-0'

_publ_requested_journal                 ?

_publ_contact_author_name               ?
_publ_contact_author_address            
;
;
_publ_contact_author_email              ?
_publ_contact_author_fax                ?
_publ_contact_author_phone              ?

_publ_section_title                     
;
;
_publ_section_abstract                  
;
;
_publ_section_references                
;
;
_publ_section_comment                   
;
;

data_ldlb4
_chemical_name_systematic               ?
_chemical_name_common                   ?
_chemical_formula_moiety                'C15 H24 O5, H2 O'
_chemical_formula_sum                   'C15 H26 O6'
_chemical_formula_iupac                 ?
_chemical_formula_weight                302.36
_chemical_absolute_configuration        ad

_chemical_melting_point                 ?

_space_group_crystal_system             monoclinic
_space_group_name_H-M_alt               'C 1 2 1'
_space_group_name_Hall                  'C 2y'
loop_
    _space_group_symop_operation_xyz
    'x, y, z'
    '-x, y, -z'
    'x+1/2, y+1/2, z'
    '-x+1/2, y+1/2, -z'

_cell_length_a                          25.5045(11)
_cell_length_b                          6.4589(3)
_cell_length_c                          19.4274(8)
_cell_angle_alpha                       90
_cell_angle_beta                        97.923(2)
_cell_angle_gamma                       90
_cell_volume                            3169.7(2)
_cell_formula_units_Z                   8
_cell_measurement_reflns_used           9834
_cell_measurement_theta_min             2.2961
_cell_measurement_theta_max             72.4579
_cell_measurement_temperature           100.(2)

_exptl_crystal_description              plate
_exptl_crystal_colour                   'clear light colourless'
_exptl_crystal_size_max                 0.400
_exptl_crystal_size_mid                 0.170
_exptl_crystal_size_min                 0.010
_exptl_crystal_density_diffrn           1.267
_exptl_crystal_density_meas             ?
_exptl_crystal_density_method           'not measured'
_exptl_crystal_F_000                    1312

_exptl_absorpt_coefficient_mu           0.805
_exptl_absorpt_correction_type          Multi-Scan
_exptl_absorpt_process_details          
;
SADABS-2016/2 - Bruker AXS area detector scaling and absorption correction
;
_exptl_absorpt_correction_T_min         0.72
_exptl_absorpt_correction_T_max         0.99

_exptl_special_details                  
;
; 

_diffrn_ambient_temperature             100.(2)

_diffrn_source                          'Ius Diamond'
_diffrn_source_type                     Microfocus

_diffrn_radiation_type                  'Cu K\a'
_diffrn_radiation_wavelength            1.54178
_diffrn_radiation_monochromator         'Helixos MX multilayer Optic'

_diffrn_measurement_device_type         'Bruker D8 QUEST PHOTON II'
_diffrn_measurement_method              ?

_diffrn_detector_area_resol_mean        7.3910

_diffrn_reflns_number                   50328
_diffrn_reflns_av_R_equivalents         0.0956
_diffrn_reflns_av_unetI/netI            0.0415
_diffrn_reflns_theta_min                2.30
_diffrn_reflns_theta_max                72.45
_diffrn_reflns_theta_full               72.45
_diffrn_measured_fraction_theta_max     0.981
_diffrn_measured_fraction_theta_full    0.981
_diffrn_reflns_limit_h_min              -31
_diffrn_reflns_limit_h_max              31
_diffrn_reflns_limit_k_min              -7
_diffrn_reflns_limit_k_max              7
_diffrn_reflns_limit_l_min              -24
_diffrn_reflns_limit_l_max              24

_refine_special_details                 
;

Refined as a 2-component twin.
;

_reflns_number_total                    6168
_reflns_number_gt                       5658
_reflns_threshold_expression            'I > 2\s(I)'

_refine_ls_structure_factor_coef        Fsqd
_refine_ls_matrix_type                  full
_refine_ls_R_factor_all                 0.0741
_refine_ls_R_factor_gt                  0.0680
_refine_ls_wR_factor_gt                 0.1739
_refine_ls_wR_factor_ref                0.1821
_refine_ls_goodness_of_fit_ref          1.085
_refine_ls_restrained_S_all             1.081
_refine_ls_number_reflns                6168
_refine_ls_number_parameters            412
_refine_ls_number_restraints            44
_refine_ls_number_constraints           ?
_refine_ls_hydrogen_treatment           constr
_refine_ls_weighting_scheme             calc
_refine_ls_weighting_details            
    'w=1/[\s^2^(Fo^2^)+(0.0950P)^2^+4.8180P] where P=(Fo^2^+2Fc^2^)/3'

_atom_sites_solution_hydrogens          geom
_atom_sites_solution_primary            ?
_atom_sites_solution_secondary          ?

_refine_ls_shift/su_max                 0.000
_refine_ls_shift/su_mean                0.000
_refine_diff_density_max                0.405
_refine_diff_density_min                -0.256
_refine_ls_extinction_method            none
_refine_ls_extinction_coef              ?
_refine_ls_abs_structure_details        
;

Flack x determined using 2170 quotients [(I+)-(I-)]/[(I+)+(I-)]
(Parsons, Flack and Wagner, Acta Cryst. B69 (2013) 249-259).
;
_refine_ls_abs_structure_Flack          0.26(11)

loop_
    _atom_type_symbol
    _atom_type_description
    _atom_type_scat_dispersion_real
    _atom_type_scat_dispersion_imag
    _atom_type_scat_source
    C C 0.0181 0.0091 'International Tables Vol C Tables 4.2.6.8 and 6.1.1.4'
    H H 0.0000 0.0000 'International Tables Vol C Tables 4.2.6.8 and 6.1.1.4'
    O O 0.0492 0.0322 'International Tables Vol C Tables 4.2.6.8 and 6.1.1.4'

_computing_data_collection              'Bruker Instrument Service vV6.2.9'
_computing_cell_refinement              'SAINT V8.38A (Bruker AXS Inc., 2017)'
_computing_data_reduction               'SAINT V8.38A (Bruker AXS Inc., 2017)'
_computing_structure_solution           'SHELXT 2014/5 (Sheldrick, 2014)'
_computing_structure_refinement         'SHELXL-2017/1 (Sheldrick, 2017)'
_computing_molecular_graphics           'shelXle (C.B. Huebschle, rev 882)'
_computing_publication_material         ?

loop_
    _atom_site_type_symbol
    _atom_site_label
    _atom_site_fract_x
    _atom_site_fract_y
    _atom_site_fract_z
    _atom_site_U_iso_or_equiv
    _atom_site_adp_type
    _atom_site_calc_flag
    _atom_site_refinement_flags_adp
    _atom_site_refinement_flags_occupancy
    _atom_site_refinement_flags_posn
    _atom_site_occupancy
    _atom_site_disorder_assembly
    _atom_site_disorder_group
    C C25 0.3076(4) 1.5609(19) 0.9562(6) 0.034(3) Uani d U P D 0.577(12) A 1
    H H25A 0.309525 1.666915 0.993232 0.041 Uiso calc U P R 0.577(12) A 1
    H H25B 0.318536 1.627026 0.914444 0.041 Uiso calc U P R 0.577(12) A 1
    O O10 0.2539(3) 1.4913(12) 0.9401(4) 0.042(2) Uani d U P D 0.577(12) A 1
    H H10B 0.247567 1.462452 0.897626 0.064 Uiso calc U P R 0.577(12) A 1
    C C25A 0.2887(8) 1.527(3) 0.9726(9) 0.042(4) Uani d U P D 0.423(12) A 2
    H H25C 0.258322 1.430462 0.965735 0.05 Uiso calc U P R 0.423(12) A 2
    H H25D 0.287247 1.603866 1.016385 0.05 Uiso calc U P R 0.423(12) A 2
    O O10A 0.2849(4) 1.6691(13) 0.9161(4) 0.037(3) Uani d U P D 0.423(12) A 2
    H H10A 0.307458 1.763561 0.92515 0.056 Uiso calc U P R 0.423(12) A 2
    O O1 0.34495(13) 0.3338(6) 0.67658(19) 0.0338(8) Uani d . . . 1.0 . .
    H H31 0.348648 0.446661 0.698159 0.051 Uiso calc U . R 1.0 . .
    O O2 0.43332(14) 0.3589(7) 0.6855(2) 0.0462(10) Uani d . . . 1.0 . .
    O O3 0.32235(13) -0.2998(6) 0.31186(18) 0.0333(7) Uani d . . . 1.0 . .
    H H29 0.302913 -0.194644 0.305507 0.05 Uiso calc U . R 1.0 . .
    O O4 0.29974(14) -0.6271(5) 0.48679(18) 0.0327(7) Uani d . . . 1.0 . .
    H H24 0.272159 -0.699103 0.478694 0.049 Uiso calc U . R 1.0 . .
    O O5 0.29162(13) -0.3255(5) 0.57505(17) 0.0289(7) Uani d . . . 1.0 . .
    H H25 0.289541 -0.442422 0.555969 0.043 Uiso calc U . R 1.0 . .
    O O6 0.43672(14) 0.6856(7) 0.7676(2) 0.0463(10) Uani d . . . 1.0 . .
    H H46 0.432946 0.583501 0.74062 0.069 Uiso calc U . R 1.0 . .
    O O7 0.28405(13) 1.3348(7) 0.82585(18) 0.0385(8) Uani d . . . 1.0 . .
    H H30 0.283582 1.377822 0.784966 0.058 Uiso calc U . R 1.0 . .
    O O8 0.34885(14) 0.6794(6) 0.7470(2) 0.0387(8) Uani d . . . 1.0 . .
    C C1 0.39103(18) 0.2658(8) 0.6656(2) 0.0301(10) Uani d . . . 1.0 . .
    C C2 0.39206(19) 0.0705(8) 0.6260(3) 0.0288(10) Uani d . . . 1.0 . .
    C C3 0.34684(18) -0.0337(7) 0.6090(2) 0.0276(9) Uani d . . . 1.0 . .
    H H20 0.315822 0.020199 0.624405 0.033 Uiso calc U . R 1.0 . .
    C C4 0.34159(18) -0.2312(7) 0.5668(2) 0.0263(9) Uani d . . . 1.0 . .
    H H5 0.370904 -0.327642 0.585068 0.032 Uiso calc U . R 1.0 . .
    C C5 0.34600(17) -0.1798(7) 0.4903(2) 0.0255(9) Uani d . . . 1.0 . .
    H H19 0.376181 -0.083672 0.489802 0.031 Uiso calc U . R 1.0 . .
    H H6 0.313607 -0.103666 0.470963 0.031 Uiso calc U . R 1.0 . .
    C C6 0.35345(18) -0.3610(7) 0.4400(2) 0.0261(9) Uani d . . . 1.0 . .
    C C7 0.36301(18) -0.2634(7) 0.3680(2) 0.0277(10) Uani d . . . 1.0 . .
    H H8 0.366839 -0.110286 0.374437 0.033 Uiso calc U . R 1.0 . .
    C C8 0.41654(19) -0.3500(8) 0.3544(2) 0.0303(10) Uani d . . . 1.0 . .
    C C9 0.4117(2) -0.5897(8) 0.3442(3) 0.0332(11) Uani d . . . 1.0 . .
    H H11 0.378986 -0.626026 0.313025 0.04 Uiso calc U . R 1.0 . .
    H H1 0.442586 -0.645588 0.324498 0.04 Uiso calc U . R 1.0 . .
    O O11 0.26043(13) 0.0398(6) 0.30243(18) 0.0345(8) Uani d . . . 1.0 . .
    O O9 0.30598(17) 1.3697(12) 1.0913(2) 0.0680(16) Uani d . . . 1.0 . .
    H H49 0.281363 1.282464 1.084842 0.102 Uiso calc U . R 1.0 . .
    C C10 0.4449(2) 0.0060(10) 0.6092(3) 0.0417(13) Uani d . . . 1.0 . .
    H H3 0.443722 -0.140052 0.595353 0.063 Uiso calc U . R 1.0 . .
    H H4 0.471561 0.024668 0.650153 0.063 Uiso calc U . R 1.0 . .
    H H2 0.45433 0.090976 0.570892 0.063 Uiso calc U . R 1.0 . .
    C C11 0.40676(18) -0.4748(7) 0.4616(2) 0.0271(9) Uani d . . . 1.0 . .
    H H16 0.41597 -0.494318 0.512864 0.033 Uiso calc U . R 1.0 . .
    C C12 0.44668(18) -0.3373(8) 0.4287(2) 0.0302(10) Uani d . . . 1.0 . .
    H H15 0.448762 -0.194466 0.447312 0.036 Uiso calc U . R 1.0 . .
    H H7 0.482483 -0.399219 0.432605 0.036 Uiso calc U . R 1.0 . .
    O O12 0.28672(14) 0.3672(6) 0.22996(19) 0.0383(8) Uani d . . . 1.0 . .
    C C13 0.4100(2) -0.6748(8) 0.4191(3) 0.0342(10) Uani d . . . 1.0 . .
    H H9 0.37862 -0.763622 0.420887 0.041 Uiso calc U . R 1.0 . .
    H H10 0.442407 -0.754568 0.435983 0.041 Uiso calc U . R 1.0 . .
    C C14 0.4377(2) -0.2384(10) 0.2964(3) 0.0397(12) Uani d . . . 1.0 . .
    H H13 0.4453 -0.094176 0.309943 0.06 Uiso calc U . R 1.0 . .
    H H14 0.411335 -0.242125 0.254645 0.06 Uiso calc U . R 1.0 . .
    H H12 0.4703 -0.305954 0.28669 0.06 Uiso calc U . R 1.0 . .
    C C15 0.30521(19) -0.5002(8) 0.4266(3) 0.0297(10) Uani d . . . 1.0 . .
    H H17 0.273099 -0.414053 0.415061 0.036 Uiso calc U . R 1.0 . .
    H H18 0.308447 -0.590729 0.386297 0.036 Uiso calc U . R 1.0 . .
    C C16 0.39058(19) 0.7665(8) 0.7725(3) 0.0329(10) Uani d . . . 1.0 . .
    C C17 0.39103(19) 0.9633(8) 0.8104(3) 0.0321(10) Uani d . . . 1.0 . .
    C C18 0.34351(19) 1.0528(8) 0.8137(2) 0.0300(10) Uani d . . . 1.0 . .
    H H22 0.31295 0.984327 0.790995 0.036 Uiso calc U . R 1.0 . .
    C C19 0.3354(2) 1.2526(8) 0.8506(2) 0.0320(10) Uani d . . . 1.0 . .
    H H41 0.363497 1.354629 0.84288 0.038 Uiso calc U . R 1.0 . .
    C C20 0.3376(2) 1.2068(8) 0.9285(2) 0.0296(10) Uani d . . . 1.0 . .
    H H23 0.367383 1.110293 0.942151 0.035 Uiso calc U . R 1.0 . .
    H H40 0.304656 1.133513 0.935341 0.035 Uiso calc U . R 1.0 . .
    C C21 0.3443(2) 1.3943(8) 0.9789(3) 0.0331(11) Uani d . . . 1.0 . .
    C C22 0.3474(2) 1.3079(9) 1.0550(2) 0.0346(11) Uani d . . . 1.0 . .
    H H28 0.34766 1.153221 1.052861 0.041 Uiso calc U . R 1.0 . .
    C C23 0.4014(2) 1.3806(10) 1.0922(3) 0.0419(13) Uani d . . . 1.0 . .
    C C24 0.4191(3) 1.2695(13) 1.1596(3) 0.063(2) Uani d . . . 1.0 . .
    H H36 0.391284 1.278648 1.189655 0.094 Uiso calc U . R 1.0 . .
    H H37 0.451543 1.333959 1.183005 0.094 Uiso calc U . R 1.0 . .
    H H21 0.425986 1.123772 1.150128 0.094 Uiso calc U . R 1.0 . .
    C C28 0.3997(3) 1.4906(13) 0.9824(3) 0.065(2) Uani d . . . 1.0 . .
    H H39 0.412446 1.502516 0.936126 0.078 Uiso calc U . R 1.0 . .
    C C29 0.4343(3) 1.3508(17) 1.0336(3) 0.066(2) Uani d . . . 1.0 . .
    H H27 0.434745 1.205384 1.017631 0.079 Uiso calc U . R 1.0 . .
    H H38 0.470896 1.40343 1.045245 0.079 Uiso calc U . R 1.0 . .
    C C31 0.4001(3) 1.6155(12) 1.0993(3) 0.0612(19) Uani d . . . 1.0 . .
    H H35 0.430257 1.665706 1.132797 0.073 Uiso calc U . R 1.0 . .
    H H34 0.366609 1.662473 1.114553 0.073 Uiso calc U . R 1.0 . .
    C C32 0.4046(5) 1.6909(16) 1.0243(4) 0.100(4) Uani d . . . 1.0 . .
    H H33 0.375749 1.788423 1.007401 0.12 Uiso calc U . R 1.0 . .
    H H32 0.439118 1.759013 1.021981 0.12 Uiso calc U . R 1.0 . .
    C C33 0.4432(2) 1.0504(10) 0.8407(3) 0.0442(13) Uani d . . . 1.0 . .
    H H44 0.438289 1.1915 0.857289 0.066 Uiso calc U . R 1.0 . .
    H H43 0.466972 1.053275 0.805183 0.066 Uiso calc U . R 1.0 . .
    H H42 0.458692 0.963821 0.879746 0.066 Uiso calc U . R 1.0 . .

loop_
    _atom_site_aniso_label
    _atom_site_aniso_U_11
    _atom_site_aniso_U_22
    _atom_site_aniso_U_33
    _atom_site_aniso_U_12
    _atom_site_aniso_U_13
    _atom_site_aniso_U_23
    C25 0.035(6) 0.038(6) 0.030(5) 0.010(4) 0.005(4) -0.009(4)
    O10 0.037(4) 0.053(5) 0.037(4) 0.007(3) 0.005(3) 0.004(3)
    C25A 0.045(10) 0.039(8) 0.046(9) 0.019(7) 0.022(8) 0.008(6)
    O10A 0.052(5) 0.023(4) 0.037(5) 0.015(4) 0.010(4) 0.002(4)
    O1 0.0322(16) 0.0302(19) 0.0405(19) 0.0072(14) 0.0104(14) -0.0049(15)
    O2 0.0342(18) 0.045(2) 0.060(2) -0.0043(17) 0.0103(17) -0.021(2)
    O3 0.0342(17) 0.0321(19) 0.0311(17) 0.0032(14) -0.0042(13) -0.0038(15)
    O4 0.0366(17) 0.0250(18) 0.0376(18) -0.0084(13) 0.0094(14) -0.0003(14)
    O5 0.0329(16) 0.0235(16) 0.0318(17) -0.0004(13) 0.0096(13) -0.0007(13)
    O6 0.0344(18) 0.041(2) 0.065(3) -0.0012(17) 0.0117(17) -0.021(2)
    O7 0.0369(18) 0.049(2) 0.0297(17) 0.0112(17) 0.0058(14) 0.0035(16)
    O8 0.0335(17) 0.039(2) 0.044(2) -0.0086(16) 0.0043(15) -0.0078(17)
    C1 0.028(2) 0.030(3) 0.033(2) 0.0000(18) 0.0061(18) -0.0002(19)
    C2 0.029(2) 0.029(2) 0.029(2) 0.0009(18) 0.0066(17) -0.0015(18)
    C3 0.028(2) 0.026(2) 0.029(2) 0.0043(18) 0.0065(17) 0.0041(18)
    C4 0.029(2) 0.023(2) 0.027(2) 0.0029(17) 0.0059(17) 0.0015(18)
    C5 0.028(2) 0.021(2) 0.028(2) 0.0030(17) 0.0047(17) 0.0036(17)
    C6 0.028(2) 0.022(2) 0.028(2) -0.0005(17) 0.0048(17) 0.0002(17)
    C7 0.031(2) 0.027(2) 0.024(2) -0.0047(17) 0.0019(17) -0.0036(17)
    C8 0.032(2) 0.030(3) 0.030(2) -0.0043(19) 0.0064(19) -0.0065(19)
    C9 0.037(3) 0.030(3) 0.032(2) 0.0003(19) 0.003(2) -0.0077(19)
    O11 0.0351(17) 0.0322(19) 0.0363(18) 0.0055(14) 0.0058(14) 0.0001(15)
    O9 0.040(2) 0.131(5) 0.036(2) -0.015(3) 0.0142(17) -0.024(3)
    C10 0.033(3) 0.041(3) 0.052(3) 0.002(2) 0.006(2) -0.011(3)
    C11 0.030(2) 0.024(2) 0.028(2) -0.0026(18) 0.0061(17) 0.0003(18)
    C12 0.031(2) 0.032(3) 0.028(2) -0.0023(19) 0.0070(18) -0.0030(19)
    O12 0.0420(19) 0.037(2) 0.0371(18) -0.0056(16) 0.0083(15) -0.0040(15)
    C13 0.037(2) 0.027(3) 0.040(3) 0.005(2) 0.008(2) -0.003(2)
    C14 0.043(3) 0.048(3) 0.031(2) -0.006(2) 0.014(2) -0.002(2)
    C15 0.032(2) 0.026(2) 0.031(2) -0.0021(18) 0.0042(18) -0.0027(18)
    C16 0.032(2) 0.036(3) 0.031(2) -0.002(2) 0.0093(19) 0.002(2)
    C17 0.032(2) 0.035(3) 0.030(2) -0.001(2) 0.0068(19) -0.001(2)
    C18 0.032(2) 0.034(3) 0.024(2) -0.0048(19) 0.0024(17) -0.0009(19)
    C19 0.033(2) 0.037(3) 0.027(2) 0.0044(19) 0.0070(18) 0.002(2)
    C20 0.041(2) 0.024(2) 0.025(2) 0.0007(19) 0.0056(18) 0.0004(17)
    C21 0.042(3) 0.026(3) 0.030(2) 0.003(2) 0.003(2) 0.0008(19)
    C22 0.045(3) 0.032(3) 0.027(2) 0.002(2) 0.007(2) 0.002(2)
    C23 0.040(3) 0.057(4) 0.029(2) 0.013(3) 0.006(2) -0.006(2)
    C24 0.070(4) 0.078(5) 0.036(3) 0.034(4) -0.009(3) -0.012(3)
    C28 0.085(5) 0.075(5) 0.036(3) -0.045(4) 0.011(3) -0.005(3)
    C29 0.044(3) 0.123(7) 0.032(3) -0.005(4) 0.011(2) -0.026(4)
    C31 0.086(5) 0.054(4) 0.042(3) -0.018(4) 0.000(3) -0.012(3)
    C32 0.182(11) 0.070(5) 0.043(4) -0.073(7) -0.006(5) -0.001(4)
    C33 0.037(3) 0.041(3) 0.055(3) -0.002(2) 0.007(2) -0.011(3)

_geom_special_details                   
;

All esds (except the esd in the dihedral angle between two l.s. planes)
are estimated using the full covariance matrix.  The cell esds are taken
into account individually in the estimation of esds in distances, angles
and torsion angles; correlations between esds in cell parameters are only
used when they are defined by crystal symmetry.  An approximate (isotropic)
treatment of cell esds is used for estimating esds involving l.s. planes.
;

loop_
    _geom_bond_atom_site_label_1
    _geom_bond_atom_site_label_2
    _geom_bond_site_symmetry_2
    _geom_bond_distance
    _geom_bond_publ_flag
    C25 O10 . 1.433(12) ?
    C25 C21 . 1.454(12) ?
    C25 H25A . 0.99 ?
    C25 H25B . 0.99 ?
    O10 H10B . 0.84 ?
    C25A O10A . 1.425(15) ?
    C25A C21 . 1.645(18) ?
    C25A H25C . 0.99 ?
    C25A H25D . 0.99 ?
    O10A H10A . 0.84 ?
    O1 C1 . 1.300(6) ?
    O1 H31 . 0.84 ?
    O2 C1 . 1.249(6) ?
    O3 C7 . 1.418(5) ?
    O3 H29 . 0.84 ?
    O4 C15 . 1.450(6) ?
    O4 H24 . 0.84 ?
    O5 C4 . 1.441(5) ?
    O5 H25 . 0.84 ?
    O6 C16 . 1.303(6) ?
    O6 H46 . 0.84 ?
    O7 C19 . 1.434(6) ?
    O7 H30 . 0.84 ?
    O8 C16 . 1.245(6) ?
    C1 C2 . 1.479(7) ?
    C2 C3 . 1.337(7) ?
    C2 C10 . 1.491(7) ?
    C3 C4 . 1.513(7) ?
    C3 H20 . 0.95 ?
    C4 C5 . 1.542(6) ?
    C4 H5 . 1.0 ?
    C5 C6 . 1.552(6) ?
    C5 H19 . 0.99 ?
    C5 H6 . 0.99 ?
    C6 C15 . 1.517(6) ?
    C6 C11 . 1.551(6) ?
    C6 C7 . 1.583(6) ?
    C7 C8 . 1.532(6) ?
    C7 H8 . 1.0 ?
    C8 C14 . 1.500(7) ?
    C8 C12 . 1.540(7) ?
    C8 C9 . 1.563(7) ?
    C9 C13 . 1.561(7) ?
    C9 H11 . 0.99 ?
    C9 H1 . 0.99 ?
    O9 C22 . 1.406(7) ?
    O9 H49 . 0.84 ?
    C10 H3 . 0.98 ?
    C10 H4 . 0.98 ?
    C10 H2 . 0.98 ?
    C11 C13 . 1.541(7) ?
    C11 C12 . 1.553(6) ?
    C11 H16 . 1.0 ?
    C12 H15 . 0.99 ?
    C12 H7 . 0.99 ?
    C13 H9 . 0.99 ?
    C13 H10 . 0.99 ?
    C14 H13 . 0.98 ?
    C14 H14 . 0.98 ?
    C14 H12 . 0.98 ?
    C15 H17 . 0.99 ?
    C15 H18 . 0.99 ?
    C16 C17 . 1.468(7) ?
    C17 C18 . 1.352(7) ?
    C17 C33 . 1.490(7) ?
    C18 C19 . 1.505(7) ?
    C18 H22 . 0.95 ?
    C19 C20 . 1.534(6) ?
    C19 H41 . 1.0 ?
    C20 C21 . 1.552(7) ?
    C20 H23 . 0.99 ?
    C20 H40 . 0.99 ?
    C21 C28 . 1.538(9) ?
    C21 C22 . 1.573(7) ?
    C22 C23 . 1.537(8) ?
    C22 H28 . 1.0 ?
    C23 C24 . 1.507(9) ?
    C23 C29 . 1.518(7) ?
    C23 C31 . 1.524(10) ?
    C24 H36 . 0.98 ?
    C24 H37 . 0.98 ?
    C24 H21 . 0.98 ?
    C28 C32 . 1.524(12) ?
    C28 C29 . 1.529(12) ?
    C28 H39 . 1.0 ?
    C29 H27 . 0.99 ?
    C29 H38 . 0.99 ?
    C31 C32 . 1.557(10) ?
    C31 H35 . 0.99 ?
    C31 H34 . 0.99 ?
    C32 H33 . 0.99 ?
    C32 H32 . 0.99 ?
    C33 H44 . 0.98 ?
    C33 H43 . 0.98 ?
    C33 H42 . 0.98 ?

loop_
    _geom_angle_atom_site_label_1
    _geom_angle_atom_site_label_2
    _geom_angle_atom_site_label_3
    _geom_angle_site_symmetry_1
    _geom_angle_site_symmetry_3
    _geom_angle
    _geom_angle_publ_flag
    O10 C25 C21 . . 112.9(10) ?
    O10 C25 H25A . . 109.0 ?
    C21 C25 H25A . . 109.0 ?
    O10 C25 H25B . . 109.0 ?
    C21 C25 H25B . . 109.0 ?
    H25A C25 H25B . . 107.8 ?
    C25 O10 H10B . . 109.5 ?
    O10A C25A C21 . . 111.1(11) ?
    O10A C25A H25C . . 109.4 ?
    C21 C25A H25C . . 109.4 ?
    O10A C25A H25D . . 109.4 ?
    C21 C25A H25D . . 109.4 ?
    H25C C25A H25D . . 108.0 ?
    C25A O10A H10A . . 109.5 ?
    C1 O1 H31 . . 109.5 ?
    C7 O3 H29 . . 109.5 ?
    C15 O4 H24 . . 109.5 ?
    C4 O5 H25 . . 109.5 ?
    C16 O6 H46 . . 109.5 ?
    C19 O7 H30 . . 109.5 ?
    O2 C1 O1 . . 123.3(5) ?
    O2 C1 C2 . . 119.7(4) ?
    O1 C1 C2 . . 117.0(4) ?
    C3 C2 C1 . . 118.8(4) ?
    C3 C2 C10 . . 125.5(5) ?
    C1 C2 C10 . . 115.7(4) ?
    C2 C3 C4 . . 124.6(4) ?
    C2 C3 H20 . . 117.7 ?
    C4 C3 H20 . . 117.7 ?
    O5 C4 C3 . . 108.0(3) ?
    O5 C4 C5 . . 112.5(4) ?
    C3 C4 C5 . . 109.1(4) ?
    O5 C4 H5 . . 109.1 ?
    C3 C4 H5 . . 109.1 ?
    C5 C4 H5 . . 109.1 ?
    C4 C5 C6 . . 118.4(4) ?
    C4 C5 H19 . . 107.7 ?
    C6 C5 H19 . . 107.7 ?
    C4 C5 H6 . . 107.7 ?
    C6 C5 H6 . . 107.7 ?
    H19 C5 H6 . . 107.1 ?
    C15 C6 C11 . . 115.2(4) ?
    C15 C6 C5 . . 112.8(4) ?
    C11 C6 C5 . . 111.5(4) ?
    C15 C6 C7 . . 107.7(4) ?
    C11 C6 C7 . . 101.0(3) ?
    C5 C6 C7 . . 107.6(4) ?
    O3 C7 C8 . . 112.4(4) ?
    O3 C7 C6 . . 115.4(4) ?
    C8 C7 C6 . . 104.9(4) ?
    O3 C7 H8 . . 108.0 ?
    C8 C7 H8 . . 108.0 ?
    C6 C7 H8 . . 108.0 ?
    C14 C8 C7 . . 112.1(4) ?
    C14 C8 C12 . . 119.6(4) ?
    C7 C8 C12 . . 99.2(4) ?
    C14 C8 C9 . . 114.3(4) ?
    C7 C8 C9 . . 109.1(4) ?
    C12 C8 C9 . . 101.1(4) ?
    C13 C9 C8 . . 104.0(4) ?
    C13 C9 H11 . . 111.0 ?
    C8 C9 H11 . . 111.0 ?
    C13 C9 H1 . . 111.0 ?
    C8 C9 H1 . . 111.0 ?
    H11 C9 H1 . . 109.0 ?
    C22 O9 H49 . . 109.5 ?
    C2 C10 H3 . . 109.5 ?
    C2 C10 H4 . . 109.5 ?
    H3 C10 H4 . . 109.5 ?
    C2 C10 H2 . . 109.5 ?
    H3 C10 H2 . . 109.5 ?
    H4 C10 H2 . . 109.5 ?
    C13 C11 C6 . . 111.3(4) ?
    C13 C11 C12 . . 99.9(4) ?
    C6 C11 C12 . . 102.6(4) ?
    C13 C11 H16 . . 113.9 ?
    C6 C11 H16 . . 113.9 ?
    C12 C11 H16 . . 113.9 ?
    C8 C12 C11 . . 94.8(4) ?
    C8 C12 H15 . . 112.8 ?
    C11 C12 H15 . . 112.8 ?
    C8 C12 H7 . . 112.8 ?
    C11 C12 H7 . . 112.8 ?
    H15 C12 H7 . . 110.2 ?
    C11 C13 C9 . . 102.4(4) ?
    C11 C13 H9 . . 111.3 ?
    C9 C13 H9 . . 111.3 ?
    C11 C13 H10 . . 111.3 ?
    C9 C13 H10 . . 111.3 ?
    H9 C13 H10 . . 109.2 ?
    C8 C14 H13 . . 109.5 ?
    C8 C14 H14 . . 109.5 ?
    H13 C14 H14 . . 109.5 ?
    C8 C14 H12 . . 109.5 ?
    H13 C14 H12 . . 109.5 ?
    H14 C14 H12 . . 109.5 ?
    O4 C15 C6 . . 111.2(4) ?
    O4 C15 H17 . . 109.4 ?
    C6 C15 H17 . . 109.4 ?
    O4 C15 H18 . . 109.4 ?
    C6 C15 H18 . . 109.4 ?
    H17 C15 H18 . . 108.0 ?
    O8 C16 O6 . . 121.4(5) ?
    O8 C16 C17 . . 122.6(5) ?
    O6 C16 C17 . . 116.0(4) ?
    C18 C17 C16 . . 116.7(5) ?
    C18 C17 C33 . . 125.3(5) ?
    C16 C17 C33 . . 118.1(4) ?
    C17 C18 C19 . . 124.9(5) ?
    C17 C18 H22 . . 117.6 ?
    C19 C18 H22 . . 117.6 ?
    O7 C19 C18 . . 109.7(4) ?
    O7 C19 C20 . . 108.1(4) ?
    C18 C19 C20 . . 108.4(4) ?
    O7 C19 H41 . . 110.2 ?
    C18 C19 H41 . . 110.2 ?
    C20 C19 H41 . . 110.2 ?
    C19 C20 C21 . . 117.3(4) ?
    C19 C20 H23 . . 108.0 ?
    C21 C20 H23 . . 108.0 ?
    C19 C20 H40 . . 108.0 ?
    C21 C20 H40 . . 108.0 ?
    H23 C20 H40 . . 107.2 ?
    C25 C21 C28 . . 105.3(7) ?
    C25 C21 C20 . . 112.1(6) ?
    C28 C21 C20 . . 111.3(5) ?
    C25 C21 C22 . . 119.7(6) ?
    C28 C21 C22 . . 100.0(4) ?
    C20 C21 C22 . . 107.7(4) ?
    C28 C21 C25A . . 124.7(9) ?
    C20 C21 C25A . . 110.0(8) ?
    C22 C21 C25A . . 100.7(6) ?
    O9 C22 C23 . . 111.3(4) ?
    O9 C22 C21 . . 115.2(5) ?
    C23 C22 C21 . . 105.1(4) ?
    O9 C22 H28 . . 108.3 ?
    C23 C22 H28 . . 108.3 ?
    C21 C22 H28 . . 108.3 ?
    C24 C23 C29 . . 117.5(6) ?
    C24 C23 C31 . . 113.7(5) ?
    C29 C23 C31 . . 102.4(7) ?
    C24 C23 C22 . . 113.9(6) ?
    C29 C23 C22 . . 99.2(4) ?
    C31 C23 C22 . . 108.5(5) ?
    C23 C24 H36 . . 109.5 ?
    C23 C24 H37 . . 109.5 ?
    H36 C24 H37 . . 109.5 ?
    C23 C24 H21 . . 109.5 ?
    H36 C24 H21 . . 109.5 ?
    H37 C24 H21 . . 109.5 ?
    C32 C28 C29 . . 99.0(7) ?
    C32 C28 C21 . . 112.0(8) ?
    C29 C28 C21 . . 103.6(5) ?
    C32 C28 H39 . . 113.7 ?
    C29 C28 H39 . . 113.7 ?
    C21 C28 H39 . . 113.7 ?
    C23 C29 C28 . . 94.9(6) ?
    C23 C29 H27 . . 112.8 ?
    C28 C29 H27 . . 112.8 ?
    C23 C29 H38 . . 112.8 ?
    C28 C29 H38 . . 112.8 ?
    H27 C29 H38 . . 110.2 ?
    C23 C31 C32 . . 102.8(6) ?
    C23 C31 H35 . . 111.2 ?
    C32 C31 H35 . . 111.2 ?
    C23 C31 H34 . . 111.2 ?
    C32 C31 H34 . . 111.2 ?
    H35 C31 H34 . . 109.1 ?
    C28 C32 C31 . . 102.9(7) ?
    C28 C32 H33 . . 111.2 ?
    C31 C32 H33 . . 111.2 ?
    C28 C32 H32 . . 111.2 ?
    C31 C32 H32 . . 111.2 ?
    H33 C32 H32 . . 109.1 ?
    C17 C33 H44 . . 109.5 ?
    C17 C33 H43 . . 109.5 ?
    H44 C33 H43 . . 109.5 ?
    C17 C33 H42 . . 109.5 ?
    H44 C33 H42 . . 109.5 ?
    H43 C33 H42 . . 109.5 ?

loop_
    _geom_torsion_atom_site_label_1
    _geom_torsion_atom_site_label_2
    _geom_torsion_atom_site_label_3
    _geom_torsion_atom_site_label_4
    _geom_torsion_site_symmetry_1
    _geom_torsion_site_symmetry_2
    _geom_torsion_site_symmetry_3
    _geom_torsion_site_symmetry_4
    _geom_torsion
    _geom_torsion_publ_flag
    O2 C1 C2 C3 . . . . 175.8(5) ?
    O1 C1 C2 C3 . . . . -5.5(7) ?
    O2 C1 C2 C10 . . . . -3.7(7) ?
    O1 C1 C2 C10 . . . . 175.1(5) ?
    C1 C2 C3 C4 . . . . 177.9(4) ?
    C10 C2 C3 C4 . . . . -2.7(8) ?
    C2 C3 C4 O5 . . . . 164.7(4) ?
    C2 C3 C4 C5 . . . . -72.8(6) ?
    O5 C4 C5 C6 . . . . -72.6(5) ?
    C3 C4 C5 C6 . . . . 167.5(4) ?
    C4 C5 C6 C15 . . . . 67.4(5) ?
    C4 C5 C6 C11 . . . . -64.1(5) ?
    C4 C5 C6 C7 . . . . -173.9(4) ?
    C15 C6 C7 O3 . . . . 8.7(5) ?
    C11 C6 C7 O3 . . . . 129.8(4) ?
    C5 C6 C7 O3 . . . . -113.2(4) ?
    C15 C6 C7 C8 . . . . -115.5(4) ?
    C11 C6 C7 C8 . . . . 5.6(4) ?
    C5 C6 C7 C8 . . . . 122.5(4) ?
    O3 C7 C8 C14 . . . . 66.5(5) ?
    C6 C7 C8 C14 . . . . -167.4(4) ?
    O3 C7 C8 C12 . . . . -166.2(4) ?
    C6 C7 C8 C12 . . . . -40.1(4) ?
    O3 C7 C8 C9 . . . . -61.1(5) ?
    C6 C7 C8 C9 . . . . 65.1(5) ?
    C14 C8 C9 C13 . . . . 159.6(4) ?
    C7 C8 C9 C13 . . . . -74.1(5) ?
    C12 C8 C9 C13 . . . . 29.8(5) ?
    C15 C6 C11 C13 . . . . 40.6(5) ?
    C5 C6 C11 C13 . . . . 170.8(4) ?
    C7 C6 C11 C13 . . . . -75.1(4) ?
    C15 C6 C11 C12 . . . . 146.6(4) ?
    C5 C6 C11 C12 . . . . -83.2(4) ?
    C7 C6 C11 C12 . . . . 30.9(4) ?
    C14 C8 C12 C11 . . . . 179.7(5) ?
    C7 C8 C12 C11 . . . . 57.6(4) ?
    C9 C8 C12 C11 . . . . -54.0(4) ?
    C13 C11 C12 C8 . . . . 59.1(4) ?
    C6 C11 C12 C8 . . . . -55.5(4) ?
    C6 C11 C13 C9 . . . . 66.7(5) ?
    C12 C11 C13 C9 . . . . -41.1(5) ?
    C8 C9 C13 C11 . . . . 7.0(5) ?
    C11 C6 C15 O4 . . . . 56.9(5) ?
    C5 C6 C15 O4 . . . . -72.7(5) ?
    C7 C6 C15 O4 . . . . 168.7(4) ?
    O8 C16 C17 C18 . . . . -3.1(7) ?
    O6 C16 C17 C18 . . . . 177.7(5) ?
    O8 C16 C17 C33 . . . . 178.1(5) ?
    O6 C16 C17 C33 . . . . -1.2(7) ?
    C16 C17 C18 C19 . . . . 179.2(4) ?
    C33 C17 C18 C19 . . . . -2.0(8) ?
    C17 C18 C19 O7 . . . . 161.7(5) ?
    C17 C18 C19 C20 . . . . -80.6(6) ?
    O7 C19 C20 C21 . . . . -76.0(5) ?
    C18 C19 C20 C21 . . . . 165.1(4) ?
    O10 C25 C21 C28 . . . . 171.4(7) ?
    O10 C25 C21 C20 . . . . 50.2(10) ?
    O10 C25 C21 C22 . . . . -77.3(9) ?
    C19 C20 C21 C25 . . . . 48.2(8) ?
    C19 C20 C21 C28 . . . . -69.4(6) ?
    C19 C20 C21 C22 . . . . -178.1(4) ?
    C19 C20 C21 C25A . . . . 73.0(8) ?
    O10A C25A C21 C28 . . . . 52.6(16) ?
    O10A C25A C21 C20 . . . . -83.6(14) ?
    O10A C25A C21 C22 . . . . 162.9(12) ?
    C25 C21 C22 O9 . . . . 13.1(9) ?
    C28 C21 C22 O9 . . . . 127.2(6) ?
    C20 C21 C22 O9 . . . . -116.4(5) ?
    C25A C21 C22 O9 . . . . -1.3(9) ?
    C25 C21 C22 C23 . . . . -109.8(7) ?
    C28 C21 C22 C23 . . . . 4.3(6) ?
    C20 C21 C22 C23 . . . . 120.6(5) ?
    C25A C21 C22 C23 . . . . -124.2(9) ?
    O9 C22 C23 C24 . . . . 70.0(7) ?
    C21 C22 C23 C24 . . . . -164.6(5) ?
    O9 C22 C23 C29 . . . . -164.3(6) ?
    C21 C22 C23 C29 . . . . -38.9(6) ?
    O9 C22 C23 C31 . . . . -57.8(7) ?
    C21 C22 C23 C31 . . . . 67.5(6) ?
    C25 C21 C28 C32 . . . . 51.0(8) ?
    C20 C21 C28 C32 . . . . 172.6(6) ?
    C22 C21 C28 C32 . . . . -73.7(7) ?
    C25A C21 C28 C32 . . . . 36.9(10) ?
    C25 C21 C28 C29 . . . . 156.7(7) ?
    C20 C21 C28 C29 . . . . -81.6(6) ?
    C22 C21 C28 C29 . . . . 32.0(6) ?
    C25A C21 C28 C29 . . . . 142.6(9) ?
    C24 C23 C29 C28 . . . . -179.9(6) ?
    C31 C23 C29 C28 . . . . -54.6(6) ?
    C22 C23 C29 C28 . . . . 56.9(6) ?
    C32 C28 C29 C23 . . . . 58.9(7) ?
    C21 C28 C29 C23 . . . . -56.4(6) ?
    C24 C23 C31 C32 . . . . 157.0(7) ?
    C29 C23 C31 C32 . . . . 29.3(8) ?
    C22 C23 C31 C32 . . . . -75.0(8) ?
    C29 C28 C32 C31 . . . . -41.7(9) ?
    C21 C28 C32 C31 . . . . 66.9(10) ?
    C23 C31 C32 C28 . . . . 7.9(10) ?

loop_
    _geom_hbond_atom_site_label_D
    _geom_hbond_atom_site_label_H
    _geom_hbond_atom_site_label_A
    _geom_hbond_site_symmetry_A
    _geom_hbond_distance_DH
    _geom_hbond_distance_HA
    _geom_hbond_distance_DA
    _geom_hbond_angle_DHA
    _geom_hbond_publ_flag
    O1 H31 O8 . 0.84 1.78 2.613(5) 173.1 ?
    O3 H29 O11 . 0.84 1.86 2.694(5) 173.5 ?
    O4 H24 O5 4_546 0.84 1.98 2.783(5) 158.6 ?
    O5 H25 O4 . 0.84 1.84 2.622(5) 153.9 ?
    O6 H46 O2 . 0.84 1.80 2.640(5) 173.0 ?
    O7 H30 O11 4_566 0.84 2.17 2.911(5) 146.9 ?
    O9 H49 O10A^b 4_547 0.84 1.84 2.642(10) 159.3 ?
    C18 H22 O12 4_556 0.95 2.63 3.523(6) 156.8 ?

_shelx_res_file                         
;

TITL ldlb4_0m_a.res in C2
    ldlb4_0m.res
    created by SHELXL-2017/1 at 11:48:50 on 28-Sep-2020
CELL 1.54178 25.5045 6.4589 19.4274 90.000 97.923 90.000
ZERR 8.00 0.0011 0.0003 0.0008 0.000 0.002 0.000
LATT -7
SYMM -x, y, -z
SFAC C H O
UNIT 120 208 48
LIST 4 ! automatically inserted. Change 6 to 4 for CHECKCIF!!
TEMP -173.160
SIZE 0.010 0.170 0.400
ACTA
HTAB O1 O8
HTAB O3 O11
EQIV $1 -x+1/2, y-1/2, -z+1
HTAB O4 O5_$1
HTAB O5 O4
HTAB O6 O2
EQIV $2 -x+1/2, y+3/2, -z+1
HTAB O7 O11_$2
EQIV $3 -x+1/2, y-1/2, -z+2
HTAB O9 O10A^b_$3
EQIV $4 -x+1/2, y+1/2, -z+1
HTAB C18 O12_$4
TWIN 1 0 0.362 0 -1 0 0 0 -1
SIMU C25 > O10a
RIGU C25 > O10a
L.S. 4
FMAP 2
PLAN -5 0 0.00
HTAB
BOND $H
CONF
WGHT    0.095000    4.818000
BASF   0.08995
FVAR       0.32295   0.57650
PART 1 21
C25   1    0.307586    1.560878    0.956171    21.00000    0.03481    0.03845 =
         0.02996   -0.00941    0.00486    0.01020
AFIX  23
H25A  2    0.309525    1.666915    0.993232    21.00000   -1.20000
H25B  2    0.318536    1.627026    0.914444    21.00000   -1.20000
AFIX   0
O10   3    0.253947    1.491331    0.940115    21.00000    0.03660    0.05339 =
         0.03716    0.00363    0.00477    0.00651
AFIX 147
H10B  2    0.247567    1.462452    0.897626    21.00000   -1.50000
AFIX   0

PART 2 -21
SAME C25 O10
C25A  1    0.288749    1.526981    0.972616   -21.00000    0.04481    0.03918 =
         0.04619    0.00765    0.02237    0.01877
AFIX  23
H25C  2    0.258322    1.430462    0.965735   -21.00000   -1.20000
H25D  2    0.287247    1.603866    1.016385   -21.00000   -1.20000
AFIX   0
O10A  3    0.284918    1.669144    0.916052   -21.00000    0.05246    0.02320 =
         0.03653    0.00197    0.00990    0.01496
AFIX 147
H10A  2    0.307458    1.763561    0.925150   -21.00000   -1.50000
AFIX   0

PART 0
O1    3    0.344951    0.333756    0.676576    11.00000    0.03225    0.03020 =
         0.04053   -0.00491    0.01044    0.00719
AFIX 147
H31   2    0.348648    0.446661    0.698159    11.00000   -1.50000
AFIX   0
O2    3    0.433321    0.358874    0.685516    11.00000    0.03421    0.04524 =
         0.06032   -0.02082    0.01025   -0.00425
O3    3    0.322352   -0.299813    0.311861    11.00000    0.03422    0.03210 =
         0.03113   -0.00376   -0.00415    0.00324
AFIX 147
H29   2    0.302913   -0.194644    0.305507    11.00000   -1.50000
AFIX   0
O4    3    0.299741   -0.627061    0.486786    11.00000    0.03659    0.02499 =
         0.03762   -0.00025    0.00944   -0.00840
AFIX 147
H24   2    0.272159   -0.699103    0.478694    11.00000   -1.50000
AFIX   0
O5    3    0.291616   -0.325455    0.575053    11.00000    0.03291    0.02349 =
         0.03175   -0.00066    0.00956   -0.00043
AFIX 147
H25   2    0.289541   -0.442422    0.555969    11.00000   -1.50000
AFIX   0
O6    3    0.436724    0.685589    0.767637    11.00000    0.03440    0.04132 =
         0.06459   -0.02075    0.01171   -0.00119
AFIX 147
H46   2    0.432946    0.583501    0.740620    11.00000   -1.50000
AFIX   0
O7    3    0.284053    1.334782    0.825848    11.00000    0.03692    0.04917 =
         0.02970    0.00351    0.00580    0.01118
AFIX 147
H30   2    0.283582    1.377822    0.784966    11.00000   -1.50000
AFIX   0
O8    3    0.348851    0.679353    0.746985    11.00000    0.03355    0.03860 =
         0.04364   -0.00779    0.00431   -0.00857
C1    1    0.391034    0.265845    0.665571    11.00000    0.02791    0.03024 =
         0.03269   -0.00017    0.00611    0.00004
C2    1    0.392056    0.070454    0.626034    11.00000    0.02937    0.02909 =
         0.02878   -0.00146    0.00657    0.00086
C3    1    0.346841   -0.033669    0.608955    11.00000    0.02818    0.02611 =
         0.02930    0.00414    0.00646    0.00429
AFIX  43
H20   2    0.315822    0.020199    0.624405    11.00000   -1.20000
AFIX   0
C4    1    0.341589   -0.231225    0.566759    11.00000    0.02947    0.02307 =
         0.02705    0.00152    0.00592    0.00286
AFIX  13
H5    2    0.370904   -0.327642    0.585068    11.00000   -1.20000
AFIX   0
C5    1    0.346005   -0.179825    0.490282    11.00000    0.02763    0.02119 =
         0.02799    0.00357    0.00465    0.00301
AFIX  23
H19   2    0.376181   -0.083672    0.489802    11.00000   -1.20000
H6    2    0.313607   -0.103666    0.470963    11.00000   -1.20000
AFIX   0
C6    1    0.353454   -0.361014    0.440040    11.00000    0.02834    0.02213 =
         0.02809    0.00021    0.00484   -0.00046
C7    1    0.363006   -0.263426    0.368040    11.00000    0.03121    0.02725 =
         0.02412   -0.00356    0.00191   -0.00471
AFIX  13
H8    2    0.366839   -0.110286    0.374437    11.00000   -1.20000
AFIX   0
C8    1    0.416545   -0.349992    0.354418    11.00000    0.03151    0.02993 =
         0.03019   -0.00648    0.00638   -0.00426
C9    1    0.411723   -0.589650    0.344220    11.00000    0.03728    0.02999 =
         0.03183   -0.00767    0.00328    0.00031
AFIX  23
H11   2    0.378986   -0.626026    0.313025    11.00000   -1.20000
H1    2    0.442586   -0.645588    0.324498    11.00000   -1.20000
AFIX   0
O11   3    0.260434    0.039800    0.302429    11.00000    0.03508    0.03224 =
         0.03630    0.00015    0.00577    0.00554
O9    3    0.305981    1.369688    1.091261    11.00000    0.03970    0.13114 =
         0.03566   -0.02420    0.01415   -0.01547
AFIX 147
H49   2    0.281363    1.282464    1.084842    11.00000   -1.50000
AFIX   0
C10   1    0.444948    0.005990    0.609163    11.00000    0.03255    0.04067 =
         0.05212   -0.01146    0.00649    0.00219
AFIX 137
H3    2    0.443722   -0.140052    0.595353    11.00000   -1.50000
H4    2    0.471561    0.024668    0.650153    11.00000   -1.50000
H2    2    0.454330    0.090976    0.570892    11.00000   -1.50000
AFIX   0

C11   1    0.406762   -0.474778    0.461559    11.00000    0.03008    0.02411 =
         0.02783    0.00026    0.00610   -0.00261
AFIX  13
H16   2    0.415970   -0.494318    0.512864    11.00000   -1.20000
AFIX   0
C12   1    0.446684   -0.337309    0.428654    11.00000    0.03056    0.03248 =
         0.02840   -0.00304    0.00697   -0.00233
AFIX  23
H15   2    0.448762   -0.194466    0.447312    11.00000   -1.20000
H7    2    0.482483   -0.399219    0.432605    11.00000   -1.20000
AFIX   0
O12   3    0.286719    0.367246    0.229957    11.00000    0.04197    0.03651 =
         0.03713   -0.00401    0.00826   -0.00565
C13   1    0.410036   -0.674785    0.419099    11.00000    0.03717    0.02656 =
         0.03986   -0.00283    0.00844    0.00504
AFIX  23
H9    2    0.378620   -0.763622    0.420887    11.00000   -1.20000
H10   2    0.442407   -0.754568    0.435983    11.00000   -1.20000
AFIX   0
C14   1    0.437703   -0.238394    0.296398    11.00000    0.04286    0.04753 =
         0.03140   -0.00182    0.01423   -0.00626
AFIX 137
H13   2    0.445300   -0.094176    0.309943    11.00000   -1.50000
H14   2    0.411335   -0.242125    0.254645    11.00000   -1.50000
H12   2    0.470300   -0.305954    0.286690    11.00000   -1.50000
AFIX   0
C15   1    0.305212   -0.500202    0.426617    11.00000    0.03175    0.02647 =
         0.03084   -0.00267    0.00418   -0.00209
AFIX  23
H17   2    0.273099   -0.414053    0.415061    11.00000   -1.20000
H18   2    0.308447   -0.590729    0.386297    11.00000   -1.20000
AFIX   0
C16   1    0.390583    0.766523    0.772508    11.00000    0.03232    0.03631 =
         0.03139    0.00229    0.00926   -0.00175
C17   1    0.391034    0.963303    0.810376    11.00000    0.03202    0.03461 =
         0.03031   -0.00052    0.00684   -0.00053
C18   1    0.343511    1.052756    0.813688    11.00000    0.03158    0.03372 =
         0.02430   -0.00092    0.00238   -0.00483
AFIX  43
H22   2    0.312950    0.984327    0.790995    11.00000   -1.20000
AFIX   0
C19   1    0.335414    1.252557    0.850624    11.00000    0.03305    0.03659 =
         0.02722    0.00212    0.00696    0.00440
AFIX  13
H41   2    0.363497    1.354629    0.842880    11.00000   -1.20000
AFIX   0
C20   1    0.337622    1.206840    0.928458    11.00000    0.04089    0.02359 =
         0.02451    0.00044    0.00559    0.00070
AFIX  23
H23   2    0.367383    1.110293    0.942151    11.00000   -1.20000
H40   2    0.304656    1.133513    0.935341    11.00000   -1.20000
AFIX   0
C21   1    0.344266    1.394264    0.978892    11.00000    0.04246    0.02602 =
         0.03041    0.00077    0.00332    0.00315
C22   1    0.347410    1.307899    1.055037    11.00000    0.04468    0.03243 =
         0.02727    0.00154    0.00721    0.00208
AFIX  13
H28   2    0.347660    1.153221    1.052861    11.00000   -1.20000
AFIX   0
C23   1    0.401371    1.380559    1.092248    11.00000    0.04000    0.05723 =
         0.02882   -0.00568    0.00634    0.01303
C24   1    0.419095    1.269532    1.159649    11.00000    0.06961    0.07812 =
         0.03629   -0.01238   -0.00891    0.03428
AFIX 137
H36   2    0.391284    1.278648    1.189655    11.00000   -1.50000
H37   2    0.451543    1.333959    1.183005    11.00000   -1.50000
H21   2    0.425986    1.123772    1.150128    11.00000   -1.50000
AFIX   0

C28   1    0.399739    1.490562    0.982415    11.00000    0.08471    0.07470 =
         0.03559   -0.00504    0.01068   -0.04509
AFIX  13
H39   2    0.412446    1.502516    0.936126    11.00000   -1.20000
AFIX   0
C29   1    0.434287    1.350846    1.033601    11.00000    0.04439    0.12346 =
         0.03217   -0.02624    0.01088   -0.00512
AFIX  23
H27   2    0.434745    1.205384    1.017631    11.00000   -1.20000
H38   2    0.470896    1.403430    1.045245    11.00000   -1.20000
AFIX   0
C31   1    0.400134    1.615476    1.099350    11.00000    0.08572    0.05354 =
         0.04178   -0.01198   -0.00023   -0.01804
AFIX  23
H35   2    0.430257    1.665706    1.132797    11.00000   -1.20000
H34   2    0.366609    1.662473    1.114553    11.00000   -1.20000
AFIX   0
C32   1    0.404627    1.690885    1.024255    11.00000    0.18156    0.06965 =
         0.04281   -0.00067   -0.00621   -0.07250
AFIX  23
H33   2    0.375749    1.788423    1.007401    11.00000   -1.20000
H32   2    0.439118    1.759013    1.021981    11.00000   -1.20000
AFIX   0
C33   1    0.443209    1.050427    0.840746    11.00000    0.03678    0.04111 =
         0.05488   -0.01118    0.00679   -0.00218
AFIX 137
H44   2    0.438289    1.191500    0.857289    11.00000   -1.50000
H43   2    0.466972    1.053275    0.805183    11.00000   -1.50000
H42   2    0.458692    0.963821    0.879746    11.00000   -1.50000
REM #####
REM #####
AFIX   0
HKLF 4 1 1 0 0 0 1 0 0 0 1


REM  ldlb4_0m_a.res in C2
REM R1 =  0.0680 for    5658 Fo > 4sig(Fo)  and  0.0741 for all    6168 data
REM    412 parameters refined using     44 restraints

END

WGHT      0.0950      4.8180

REM Instructions for potential hydrogen bonds
HTAB O10^a O7
HTAB O1 O8
HTAB O3 O11
HTAB O4 O5_$1
HTAB O5 O4
HTAB O6 O2
HTAB O7 O11_$2
HTAB O9 O10^a_$3
HTAB O9 O10A^b_$3
HTAB C18 O12_$4

REM Highest difference peak  0.405,  deepest hole -0.256,  1-sigma level  0.073
Q1    1   0.4370 -0.6889  0.4878  11.00000  0.05    0.41
Q2    1   0.2082  0.3656  0.3398  11.00000  0.05    0.37
Q3    1   0.3010  0.4896  0.2519  11.00000  0.05    0.36
Q4    1   0.3287  1.2030  1.1333  11.00000  0.05    0.35
Q5    1   0.2970  0.7683  0.1894  11.00000  0.05    0.34
;
_shelx_res_checksum                     3423

_shelx_hkl_file                         
;
   2   0   0 2057.89  102.39
   2   0   0 1819.02  101.69
   2   0   0 2102.59  102.59
  -2   0   0 2142.29  102.49
  -2   0   0 2082.09  101.89
  -2   0   0 1804.42  101.69
  -2   0   0 2169.78  102.59
   2   0   0 1843.52  101.79
   4   0   0 9999.00  512.55
  -4   0   0 9858.61  503.75
   6   0   0 1210.08   61.49
   6   0   0 1134.89   61.59
   6   0   0 1043.10   59.09
  -6   0   0 1104.09   59.29
   6   0   0 1077.09   72.39
  -6   0   0 1138.39   62.09
   8   0   0 3622.04  187.08
  -8   0   0 3677.13  188.88
   8   0   0 3520.85  184.68
   8   0   0 3846.72  187.98
  -8   0   0 3552.54  186.98
   8   0   0 3629.74  189.78
   8   0   0 3239.08  182.58
  -8   0   0 3612.24  184.78
   8   0   0 3546.35  203.78
  10   0   0  108.19   24.90
  10   0   0   75.59   11.10
 -10   0   0   75.79   10.60
  10   0   0   92.69   10.60
  10   0   0   66.69    6.20
 -10   0   0   80.99   11.00
  10   0   0   87.09    8.60
  10   0   0   83.09   11.50
 -10   0   0   79.69    8.30
  12   0   0  165.58   16.80
  12   0   0  140.99   10.40
  12   0   0  160.38   13.80
  12   0   0  148.79   14.40
 -12   0   0  155.68   13.90
 -12   0   0  157.28   12.20
  12   0   0  142.59   29.90
  12   0   0  148.99   17.30
  12   0   0  133.79    9.30
 -12   0   0  132.59   10.60
  14   0   0  576.24   39.30
  14   0   0  640.34   68.09
  14   0   0  624.24   39.60
  14   0   0  592.14   44.80
 -14   0   0  633.84   35.90
  14   0   0  541.65   32.10
  14   0   0  680.53   46.80
 -14   0   0  608.24   39.70
 -14   0   0  560.14   33.00
  14   0   0  552.84   33.80
 -16   0   0  356.76   22.60
 -16   0   0  415.66   24.70
  16   0   0  386.16   24.30
  16   0   0  443.96   32.70
  16   0   0  386.16   35.70
  16   0   0  371.06   21.90
  16   0   0  395.76   68.89
 -16   0   0  420.46   31.60
 -16   0   0  366.46   21.50
  16   0   0  394.86   22.40
 -16   0   0  426.26   25.20
 -16   0   0  381.96   25.50
 -16   0   0  348.47   22.70
  16   0   0  409.96   30.30
  18   0   0  109.39   10.60
  18   0   0  115.89    8.30
 -18   0   0  116.79   17.00
 -18   0   0  110.89    7.70
 -18   0   0  109.69   11.30
  18   0   0  129.39   16.10
  18   0   0  146.99   18.10
  18   0   0  121.59    8.70
  18   0   0   94.59   25.80
 -18   0   0  112.69    9.40
  18   0   0  172.88   70.99
  20   0   0  995.00   52.59
 -20   0   0 1008.60   57.59
 -20   0   0  915.31   52.89
  20   0   0  989.80   64.29
 -20   0   0 1022.90   54.89
  20   0   0  967.80   55.19
 -20   0   0 1035.50   70.59
 -20   0   0  936.11   52.29
  20   0   0  923.81   52.59
 -20   0   0  994.80   56.79
  20   0   0  934.51   55.69
  20   0   0 1049.99   68.09
 -22   0   0  408.26   27.70
  22   0   0  384.86   26.80
  22   0   0  485.15   41.30
 -22   0   0  396.06   27.60
  22   0   0  419.26   23.40
  22   0   0  443.66   26.80
 -22   0   0  386.26   25.40
 -22   0   0  351.76   23.90
  22   0   0  395.46   24.70
 -22   0   0  439.26   24.00
  22   0   0  369.96   36.60
 -22   0   0  385.56   39.30
 -24   0   0   47.00   12.60
 -24   0   0   66.99    8.00
  24   0   0   58.09    5.60
  24   0   0   56.69    6.40
 -24   0   0   54.79   24.10
  24   0   0   76.09    9.20
  24   0   0   80.29   11.50
 -24   0   0   69.49    9.50
 -26   0   0    1.40    2.20
  26   0   0    1.80    2.20
  26   0   0    2.10    1.40
 -26   0   0    1.80    3.20
  26   0   0    1.50    4.00
  28   0   0   15.60    4.40
 -28   0   0   10.10    4.10
 -28   0   0   17.80    4.30
  28   0   0    8.00    3.50
  28   0   0   18.70    6.90
  30   0   0   13.40    4.60
 -30   0   0   23.50    5.40
 -30   0   0   13.20    5.10
 -30   0   0   18.70    4.80
  30   0   0   13.80    3.80
   1  -1   0 1829.32   95.79
  -1  -1   0 1722.33   93.99
  -1  -1   0 1566.34   93.69
  -1   1   0 1927.31   97.99
   1   1   0 1932.01   96.29
  -1   1   0 1752.52   97.49
   1   1   0 1989.90   98.79
   1   1   0 1978.30   98.19
   1   1   0 1731.33   96.89
   3  -1   0 1525.05   84.09
  -3  -1   0 1507.25   83.59
  -3  -1   0 1574.94   84.59
   3  -1   0 1630.44   85.89
  -3  -1   0 1561.54   86.39
  -3   1   0 1739.93   89.69
  -3   1   0 1713.73   87.69
   3   1   0 1532.05   83.79
   3   1   0 1694.83   88.69
  -3   1   0 1867.41   90.59
   3   1   0 1786.72   93.79
  -3   1   0 1668.63   87.39
   3   1   0 1516.35   85.59
  -3   1   0 1528.75   88.89
   5  -1   0  162.38   10.50
  -5  -1   0  159.78   12.60
   5  -1   0  175.08   12.40
  -5  -1   0  179.08   11.50
  -5  -1   0  187.28   11.20
   5   1   0  169.38   12.80
  -5   1   0  170.78   12.60
   5   1   0  189.28   11.20
  -5   1   0  145.89   16.50
  -5   1   0  137.69   18.50
   5   1   0  184.28   10.30
   5   1   0  153.38   19.40
  -5   1   0  176.08   15.60
  -7  -1   0 2045.90  121.49
   7  -1   0 2437.46  126.09
  -7  -1   0 2329.37  125.69
   7  -1   0 2272.87  122.39
  -7  -1   0 2612.44  125.19
  -7  -1   0 2530.75  123.79
  -7   1   0 2268.27  125.99
  -7   1   0 2180.88  139.79
   7   1   0 2377.06  140.59
   7   1   0 2543.05  124.09
   7   1   0 2438.46  123.69
  -7   1   0 2468.35  129.39
   7   1   0 2413.06  126.29
  -9  -1   0  284.47   16.80
  -9  -1   0  311.07   19.10
   9  -1   0  307.67   21.00
   9  -1   0  281.77   17.80
   9  -1   0  243.58   35.40
  -9  -1   0  304.87   21.20
   9  -1   0  303.37   26.10
   9  -1   0  262.97   16.50
  -9   1   0  276.67   21.50
   9   1   0  286.27   19.20
   9   1   0  304.57   20.40
   9   1   0  282.77   21.30
   9   1   0  310.87   35.80
  -9   1   0  300.97   25.00
  11  -1   0  487.85   38.80
 -11  -1   0  517.95   34.20
  11  -1   0  472.35   28.70
  11  -1   0  433.46   57.79
 -11  -1   0  510.35   30.00
 -11  -1   0  473.25   26.90
  11  -1   0  506.05   35.10
  11  -1   0  478.65   32.30
  11  -1   0  451.45   26.70
  11   1   0  452.45   27.80
  11   1   0  508.25   51.59
 -11   1   0  495.45   33.80
  11   1   0  495.35   33.40
  11   1   0  477.95   30.60
  11   1   0  474.25   31.60
 -13  -1   0   44.90    7.10
  13  -1   0   33.30   32.60
  13  -1   0   46.70    9.00
  13  -1   0   43.20    6.60
  13  -1   0   44.30   13.50
  13  -1   0   43.60    9.30
 -13  -1   0   49.50    7.00
  13  -1   0   48.90    5.20
  13  -1   0   45.20    4.00
 -13  -1   0   36.30   10.20
 -13  -1   0   42.80    3.80
  13   1   0   43.00    6.80
  13   1   0   33.20    7.60
 -13   1   0   35.70    8.70
  13   1   0   50.29    9.50
  13   1   0   46.10    9.40
  13   1   0   48.00   27.00
  15  -1   0  238.48   25.00
  15  -1   0  213.38   15.10
  15  -1   0  197.18   27.20
 -15  -1   0  241.58   15.10
 -15  -1   0  249.58   20.60
  15  -1   0  229.38   13.80
 -15  -1   0  237.08   20.20
  15  -1   0  251.17   23.80
 -15  -1   0  220.08   13.40
  15  -1   0  259.57   19.60
  15   1   0  261.97   27.80
  15   1   0  241.88   20.80
  15   1   0  209.68   16.20
 -15   1   0  206.08   23.00
  15   1   0  212.28   14.10
  15   1   0  222.48   22.10
  15   1   0  250.17   44.10
 -17  -1   0  528.95   38.90
  17  -1   0  550.64   32.40
  17  -1   0  533.25   40.30
  17  -1   0  624.84   39.30
 -17  -1   0  549.25   29.40
 -17  -1   0  540.15   30.50
 -17  -1   0  536.95   31.40
  17  -1   0  538.55   30.00
  17  -1   0  499.05   29.60
  17  -1   0  615.14   39.50
  17  -1   0  568.74   46.80
  17  -1   0  502.05   49.60
 -17  -1   0  602.84   38.30
 -17   1   0  507.55   33.70
  17   1   0  574.84   40.00
  17   1   0  455.65   41.80
 -17   1   0  526.15   32.20
 -17   1   0  551.04   44.10
  17   1   0  529.05   30.40
 -17   1   0  535.95   32.40
 -17   1   0  562.54   35.60
  17   1   0  508.65   33.10
  17   1   0  570.24   74.69
  17   1   0  522.35   35.60
  17   1   0  619.64   44.20
 -17   1   0  580.84   30.50
  17   1   0  511.25   29.60
 -19  -1   0   17.60    6.00
 -19  -1   0    6.60    4.90
 -19  -1   0   15.20    2.80
  19  -1   0   16.90    8.20
  19  -1   0   20.30    5.10
  19  -1   0   19.80    3.10
 -19  -1   0   21.90    7.30
  19  -1   0   14.20    3.40
  19  -1   0    9.90    6.30
 -19  -1   0   11.30    3.80
 -19  -1   0   11.40    3.50
  19  -1   0   12.10    4.60
 -19   1   0   14.60   10.90
 -19   1   0    8.10    5.00
  19   1   0   22.50    9.00
  19   1   0   19.20    3.30
 -19   1   0   11.20    6.10
  19   1   0   16.60    5.30
  19   1   0   21.80    9.60
 -19   1   0   12.30    3.60
 -19   1   0   17.30    3.80
  19   1   0   21.10    5.90
  19   1   0   21.60    6.70
 -19   1   0   10.20    4.30
 -19   1   0   15.60    3.40
  19   1   0   15.40    4.80
  21  -1   0   21.40    5.50
  21  -1   0   13.50   10.30
 -21  -1   0   15.70    4.30
 -21  -1   0   17.00    2.90
  21  -1   0   15.70    5.00
 -21  -1   0   13.80    9.80
  21  -1   0   15.70    3.00
  21  -1   0   17.50    8.80
  21  -1   0   18.80    4.30
 -21  -1   0   13.60    4.60
 -21  -1   0   11.90    4.60
 -21   1   0    8.20    5.30
  21   1   0    9.50   18.90
 -21   1   0   19.40    3.40
 -21   1   0    8.60   12.60
  21   1   0    4.40   29.60
  21   1   0    8.80    3.40
 -21   1   0   20.50   11.80
  21   1   0   22.70    6.70
 -21   1   0   14.90    3.60
 -21   1   0    9.90    4.30
  21   1   0   18.30    4.90
  21   1   0  -48.10   83.79
 -21   1   0   15.30    5.00
  21   1   0   14.20    4.80
  23  -1   0   22.80    6.30
  23  -1   0   26.50    9.40
  23  -1   0   22.00    3.80
 -23  -1   0   20.40    5.30
 -23  -1   0    5.80   11.90
 -23  -1   0   12.40    3.20
  23  -1   0    9.10   14.70
  23  -1   0   17.80    3.20
 -23  -1   0   18.70    6.10
 -23  -1   0   11.30    3.20
  23   1   0   24.30    6.80
 -23   1   0  -10.40   17.50
  23   1   0   24.30    7.60
  23   1   0   13.90    3.60
 -23   1   0   23.30    6.90
 -23   1   0   30.10    6.90
 -23   1   0   18.30    5.50
  23   1   0   22.50    5.60
 -23   1   0   22.20    3.30
 -25  -1   0   25.50    5.40
  25  -1   0   33.90    5.70
  25  -1   0   21.50    4.20
  25  -1   0   17.00    8.10
 -25  -1   0   20.50    4.30
  25  -1   0   26.60    6.60
  25  -1   0   25.90    3.60
 -25  -1   0   26.50    6.40
 -25   1   0   27.10    7.00
 -25   1   0   23.90    3.60
 -25   1   0   30.50    5.70
  25   1   0   23.70    5.90
  25   1   0   27.40    8.50
 -25   1   0   26.10    6.70
  25   1   0   26.90    5.90
  27  -1   0    7.60    2.30
  27  -1   0    4.00    3.60
 -27  -1   0    5.80    2.80
 -27  -1   0    4.80    2.70
  27  -1   0    4.80    2.80
 -27  -1   0    4.90    3.30
 -27   1   0    4.40    3.10
  27   1   0    2.70    2.70
 -27   1   0    4.20    3.10
  27   1   0    8.30    6.60
  27   1   0    0.80    3.60
 -27   1   0    4.90    3.20
  29  -1   0    2.90    1.70
 -29  -1   0   -1.30    1.70
  29  -1   0    0.30    1.50
 -29  -1   0    0.80    2.20
  29  -1   0   -0.10    2.10
  29   1   0   -1.00    1.70
 -29   1   0   -0.80    1.90
 -29   1   0    1.20    2.30
  29   1   0    0.30    2.00
   0  -2   0 1828.02   93.99
   0   2   0 1809.82  101.09
   0   2   0 1775.82   98.79
   0   2   0 1530.85   96.79
  -2  -2   0  133.39    9.80
   2  -2   0  140.49   13.00
  -2  -2   0  141.99    9.40
  -2  -2   0  124.49   10.40
  -2   2   0  132.39   14.90
   2   2   0  121.99   13.60
  -2   2   0  130.19   16.40
   2   2   0  134.39   16.40
   2   2   0  147.19   16.00
  -2   2   0  149.39   15.50
   2   2   0  137.49   12.90
  -4  -2   0 1026.80   56.89
  -4  -2   0 1007.90   58.59
   4  -2   0 1116.69   61.49
   4  -2   0 1041.30   58.29
  -4   2   0  909.71   80.59
   4   2   0 1164.48   67.69
  -4   2   0  987.70   58.99
   4   2   0 1130.99   67.69
   4   2   0 1241.78   68.19
  -4   2   0 1051.29   72.19
  -4   2   0 1200.68   64.99
  -6  -2   0  581.34   33.10
   6  -2   0  605.44   36.80
   6  -2   0  541.75   33.20
  -6  -2   0  584.54   34.60
  -6  -2   0  567.44   32.50
  -6  -2   0  589.24   38.20
   6   2   0  602.44   46.70
  -6   2   0  589.74   43.30
  -6   2   0  635.74   39.40
   6   2   0  663.53   44.40
   6   2   0  673.63   44.30
  -6   2   0  558.14   41.70
  -6   2   0  611.74   42.90
   8  -2   0  347.57   24.10
   8  -2   0  336.67   21.20
  -8  -2   0  352.16   22.50
  -8  -2   0  331.47   25.40
  -8  -2   0  333.97   22.20
  -8  -2   0  297.17   19.60
   8  -2   0  407.76   34.10
   8   2   0  380.06   31.40
   8   2   0  372.46   22.10
  -8   2   0  396.46   35.20
   8   2   0  365.16   31.40
  -8   2   0  330.87   31.40
  -8   2   0  353.36   30.20
 -10  -2   0  242.18   14.90
  10  -2   0  274.07   29.50
  10  -2   0  206.58   15.00
  10  -2   0  249.78   19.30
  10  -2   0  206.88   13.30
 -10  -2   0  191.48   12.90
 -10  -2   0  214.18   18.80
 -10  -2   0  244.08   16.80
  10   2   0  245.98   17.40
  10   2   0  233.28   25.00
  10   2   0  245.48   34.40
 -10   2   0  241.38   26.30
  12  -2   0   19.00    4.50
  12  -2   0    8.50    5.80
 -12  -2   0   15.40    2.60
  12  -2   0   24.70    8.00
 -12  -2   0   15.80    4.70
  12  -2   0   13.20    2.60
 -12  -2   0    9.10    3.30
 -12  -2   0   18.90    7.80
  12  -2   0   12.60    2.80
  12  -2   0    8.70    4.60
  12   2   0   10.00    4.80
  12   2   0   -3.40   12.90
  12   2   0   11.10    6.90
 -12   2   0   22.70   34.80
  14  -2   0  379.06   25.50
  14  -2   0  402.26   39.90
  14  -2   0  365.36   21.30
 -14  -2   0  399.06   27.50
 -14  -2   0  368.06   23.00
 -14  -2   0  373.36   21.30
  14  -2   0  381.06   22.90
  14  -2   0  433.96   34.50
  14  -2   0  389.66   30.90
 -14   2   0  369.06   26.40
  14   2   0  442.96   39.80
 -14   2   0  362.66   22.50
  14   2   0  365.16   21.00
 -14   2   0  401.96   40.50
  14   2   0  395.66   26.60
 -14   2   0  376.76   32.90
 -14   2   0  368.46   25.70
  14   2   0  443.36   54.19
 -14   2   0  374.16   21.90
 -16  -2   0  104.49    8.10
 -16  -2   0  106.09    7.50
  16  -2   0  114.69    9.70
  16  -2   0  122.39   17.30
 -16  -2   0  137.59   16.10
 -16  -2   0  109.99    7.80
 -16  -2   0  106.19    9.20
  16  -2   0  114.29   18.70
 -16  -2   0   91.29    9.80
  16  -2   0  110.69   12.90
 -16  -2   0  100.59   13.00
  16  -2   0  105.49    7.80
  16  -2   0  128.49   10.20
 -16   2   0  106.09   12.00
  16   2   0  156.98   38.90
  16   2   0  139.49   24.70
 -16   2   0  113.09    8.70
 -16   2   0  107.69   12.70
  16   2   0  104.69    7.40
  16   2   0  104.79   11.60
 -16   2   0  111.49    7.80
 -16   2   0  105.59   22.20
  18  -2   0  131.59   11.10
  18  -2   0  141.09   12.00
  18  -2   0  117.99    8.90
  18  -2   0  117.79   17.60
  18  -2   0  107.99   18.70
 -18  -2   0  127.19   16.50
 -18  -2   0   96.99   18.90
 -18  -2   0  126.49   10.60
 -18  -2   0  119.99    9.20
  18  -2   0  116.39    8.70
 -18  -2   0  117.89   11.10
 -18  -2   0  124.49    8.50
 -18  -2   0  118.59    8.80
  18   2   0   85.39   34.30
 -18   2   0  109.19   11.70
  18   2   0  118.69   29.70
  18   2   0  164.98   17.80
  18   2   0   90.59   39.60
  18   2   0  158.98   14.60
  18   2   0  128.59    8.60
 -18   2   0  131.09   14.50
  18   2   0  130.49   12.80
 -18   2   0  140.79   13.70
 -18   2   0  122.99    8.90
 -18   2   0  119.79    9.10
 -18   2   0  132.09   28.90
 -20  -2   0   40.40    7.80
 -20  -2   0   46.80   14.50
 -20  -2   0   46.80    7.10
  20  -2   0   64.49    8.40
  20  -2   0   58.09    7.90
  20  -2   0   61.59   17.10
  20  -2   0   57.49    7.70
 -20  -2   0   53.19    5.60
  20  -2   0   74.09   15.30
 -20  -2   0   54.89    5.10
 -20  -2   0   55.39    6.10
  20  -2   0   53.79    5.30
 -20  -2   0   52.39   14.90
 -20   2   0   58.19    5.60
  20   2   0   42.70    8.50
  20   2   0   17.90   22.00
 -20   2   0   54.49    5.60
 -20   2   0   46.20    9.10
 -20   2   0   64.39   12.60
 -20   2   0   56.89    8.40
  20   2   0   68.29    9.50
  20   2   0   99.49   42.80
 -20   2   0   54.09   23.70
  20   2   0   77.09   13.50
  20   2   0   58.39    5.40
 -20   2   0   51.69    9.90
  22  -2   0   93.99   11.20
  22  -2   0   60.69   18.70
  22  -2   0   83.29    6.80
 -22  -2   0   70.59    6.60
  22  -2   0   81.89    7.40
 -22  -2   0   68.19    9.50
 -22  -2   0   85.59   23.70
  22  -2   0   99.09   11.00
 -22  -2   0   75.29    6.40
 -22  -2   0   73.89    7.90
  22   2   0   92.79   11.40
 -22   2   0   79.49    7.10
 -22   2   0   81.59    9.40
 -22   2   0   58.99   30.60
  22   2   0   98.49   10.30
  22   2   0  101.69   60.09
 -22   2   0   72.69    7.10
 -22   2   0  105.59   12.00
 -22   2   0   89.89   11.40
 -22   2   0  101.19   15.50
 -24  -2   0    0.20    3.10
  24  -2   0    2.60    1.50
 -24  -2   0    2.90    3.70
  24  -2   0    2.20    1.50
 -24  -2   0    0.30    2.10
  24  -2   0    3.50    3.00
  24  -2   0    1.10    3.30
 -24  -2   0    0.70    1.30
  24   2   0   -1.50    2.90
  24   2   0   -0.90    2.40
 -24   2   0    3.90    3.70
 -24   2   0    2.20    4.20
 -24   2   0    4.10    2.10
 -24   2   0    2.40    2.90
  24   2   0    4.30    3.00
 -24   2   0    1.40    3.50
 -26  -2   0   12.80    4.20
  26  -2   0   12.60    3.70
  26  -2   0    8.00    4.10
  26  -2   0   14.90    3.00
  26  -2   0   14.10    6.10
  26  -2   0   12.40    3.40
 -26  -2   0   11.10    4.10
 -26  -2   0   16.00    3.60
  26   2   0    9.40    5.70
  26   2   0   13.40    4.60
 -26   2   0   11.40    2.80
  26   2   0   15.60    5.50
 -26   2   0   18.70    6.10
 -26   2   0   11.40    4.30
 -26   2   0   11.60    4.80
 -26   2   0    6.50    3.50
 -28  -2   0   12.60    3.80
  28  -2   0   13.20    3.40
  28  -2   0   12.90    2.30
  28  -2   0   15.30    3.50
 -28  -2   0    9.40    3.50
  28   2   0    6.40    3.40
  28   2   0    9.50    3.40
 -28   2   0    8.20    3.00
  28   2   0    9.20    4.60
 -28   2   0   14.70    5.00
 -28   2   0    9.80    4.60
 -30  -2   0    7.20    3.00
  30  -2   0    3.40    2.00
  30  -2   0    0.40    1.60
 -30  -2   0   -0.20    1.80
 -30   2   0    6.40    2.40
 -30   2   0    3.00    2.40
  30   2   0    0.70    2.10
 -30   2   0    1.90    2.30
  30   2   0    2.40    2.50
  -1  -3   0 2564.24  148.49
   1  -3   0 3048.79  157.08
  -1  -3   0 2757.52  149.49
  -1  -3   0 2553.94  149.09
   1  -3   0 2972.90  154.08
  -1   3   0 2927.81  160.78
  -1   3   0 2680.13  158.98
  -1   3   0 3093.89  165.88
   1   3   0 2948.70  161.68
   1   3   0 2740.73  157.88
   1   3   0 3018.30  164.88
   3  -3   0  983.20   60.19
  -3  -3   0  842.12   52.39
   3  -3   0 1008.50   62.59
  -3  -3   0  915.81   55.49
   3   3   0 1010.10   66.69
   3   3   0  932.31   61.79
  -3   3   0 1059.79   65.59
   3   3   0  972.40   68.39
   3   3   0 1048.70   55.79
  -3   3   0 1023.20   68.59
  -3   3   0  961.80   65.39
   5  -3   0   57.49   12.00
   5  -3   0   56.09    6.30
  -5  -3   0   54.19    7.00
  -5  -3   0   52.99    5.20
   5  -3   0   75.59   10.00
   5  -3   0   52.39    7.00
  -5   3   0   59.49   13.70
   5   3   0   74.89   14.00
   5   3   0   80.29   15.50
  -5   3   0   76.59   15.20
   5   3   0   68.39   14.20
  -5   3   0   67.79   11.90
   7  -3   0  594.64   36.60
  -7  -3   0  603.64   37.60
  -7  -3   0  604.04   35.70
  -7  -3   0  572.14   34.10
   7  -3   0  667.83   42.00
   7   3   0  729.83   54.99
  -7   3   0  649.24   44.70
  -7   3   0  606.54   51.19
   7   3   0  696.93   53.19
  -7   3   0  677.53   50.69
   7   3   0  651.93   51.59
  -9  -3   0   55.69    5.70
   9  -3   0   71.29   17.30
   9  -3   0   56.39    6.80
   9  -3   0   59.59    4.70
  -9  -3   0   73.59    9.10
  -9  -3   0   68.79    7.90
  -9   3   0   55.79   14.10
   9   3   0  109.59   22.60
   9   3   0   66.09   22.00
  -9   3   0   64.29   15.50
 -11  -3   0  181.98   12.60
 -11  -3   0  181.08   11.20
  11  -3   0  164.18   11.30
  11  -3   0  184.98   14.00
 -11  -3   0  188.58   15.90
  11  -3   0  196.58   11.90
  11  -3   0  144.19   25.40
  11  -3   0  193.78   19.20
 -11   3   0  193.78   32.50
  11   3   0  189.18   15.80
 -11   3   0  155.78   16.30
  11   3   0  226.28   34.90
 -11   3   0  211.38   22.20
  11   3   0  187.78   29.40
  11   3   0  182.18   11.20
  11   3   0  197.68   39.10
 -11   3   0  186.28   13.80
 -11   3   0  181.58   29.40
 -11   3   0  221.08   20.90
  13  -3   0  159.78   20.60
 -13  -3   0  135.99    9.00
  13  -3   0  153.78   19.30
 -13  -3   0  131.09   10.40
  13  -3   0  128.39   12.60
 -13  -3   0  128.29    8.60
  13  -3   0  137.59   10.00
 -13  -3   0  129.49   13.60
  13  -3   0  127.69    8.70
 -13   3   0  129.69   24.90
  13   3   0  146.39   46.30
  13   3   0  124.49    8.50
 -13   3   0  169.78   25.70
  13   3   0  154.98   17.30
  13   3   0  146.69   14.90
  13   3   0  123.99   13.40
 -13   3   0  138.39   11.00
 -13   3   0  121.19   13.70
  13   3   0  162.58   15.90
  13   3   0  121.69   26.40
 -13   3   0   87.59   34.50
  13   3   0  119.69    8.70
 -13   3   0  144.29   17.90
 -13   3   0  125.49    8.90
  13   3   0  159.98   36.40
  15  -3   0  105.89    9.00
 -15  -3   0  104.99    7.60
 -15  -3   0   92.59    8.90
  15  -3   0   86.69    9.70
 -15  -3   0   89.39   15.80
  15  -3   0  104.69   12.30
  15  -3   0   88.49   17.30
  15  -3   0   93.79    7.30
  15   3   0  112.39   40.90
 -15   3   0   73.39   21.10
  15   3   0   86.29   28.50
 -15   3   0  113.09   25.20
 -15   3   0  122.79   13.60
  15   3   0  102.39    7.20
 -15   3   0   75.49   11.70
  15   3   0  112.79   13.10
  15   3   0   99.49    7.00
 -15   3   0   96.39    7.30
  15   3   0   96.89   11.60
 -15   3   0   86.89   12.90
 -15   3   0  132.89   16.60
 -15   3   0   99.19   12.30
  15   3   0  138.29   16.90
  15   3   0  113.39   34.40
 -15   3   0  110.59    9.10
 -17  -3   0   16.80    2.80
 -17  -3   0   14.60    3.40
  17  -3   0    7.00    6.30
 -17  -3   0   19.50    3.80
  17  -3   0   16.50    3.10
 -17  -3   0   14.10    4.40
  17  -3   0   14.20    4.40
 -17  -3   0    7.70    6.30
  17  -3   0   12.30    3.20
 -17  -3   0    0.10    6.40
  17   3   0   15.10    2.70
  17   3   0   20.50    6.30
 -17   3   0   11.00    5.40
 -17   3   0   17.30   16.60
  17   3   0   15.40    6.00
 -17   3   0   10.90    3.10
 -17   3   0   27.50    9.50
 -17   3   0    1.00    9.00
 -17   3   0    9.60    4.50
  17   3   0   20.70    7.80
  17   3   0   41.70   39.20
 -17   3   0   13.90    5.20
 -17   3   0   11.10    5.90
  17   3   0    4.50    4.60
 -17   3   0   15.00    3.00
  17   3   0   -4.10   16.00
  17   3   0   29.80   29.70
 -19  -3   0  106.19    9.00
  19  -3   0  113.39    8.80
 -19  -3   0  109.59    8.20
 -19  -3   0   97.89   19.90
  19  -3   0  110.59   10.80
  19  -3   0  100.09   19.40
  19  -3   0  108.09   11.10
 -19  -3   0  114.69    8.80
 -19  -3   0  115.49   10.60
 -19  -3   0   92.19   18.30
  19  -3   0  110.09    8.20
  19   3   0  110.29   14.00
 -19   3   0  127.39   18.30
  19   3   0  156.68   18.90
 -19   3   0  120.99    9.20
  19   3   0   72.19   27.70
 -19   3   0  120.49   13.60
  19   3   0  121.99    8.30
 -19   3   0   99.79   12.50
 -19   3   0  112.89    8.30
 -19   3   0  118.79   13.50
  19   3   0  139.19   12.90
  19   3   0   55.89   49.30
  21  -3   0    1.90    1.70
 -21  -3   0    4.70    2.40
  21  -3   0    2.40    1.60
 -21  -3   0    3.60    1.60
  21  -3   0    0.80    2.70
  21  -3   0   16.80   14.00
  21  -3   0    3.70    3.60
 -21  -3   0    0.40    2.90
 -21  -3   0    7.20    2.80
  21   3   0    3.70    2.00
 -21   3   0   36.60   24.50
  21   3   0    3.70    3.60
 -21   3   0    3.50    1.70
 -21   3   0    3.10    2.00
  21   3   0    1.40    3.90
 -21   3   0   14.90    8.10
  21   3   0   -0.30    3.60
 -21   3   0    0.70    4.70
 -21   3   0   -0.20    3.60
 -21   3   0    5.50    4.10
 -21   3   0    1.80    2.70
  23  -3   0   43.70    4.70
 -23  -3   0   31.00    7.40
  23  -3   0   38.20    7.30
  23  -3   0   36.50    8.50
  23  -3   0   45.40    5.20
 -23  -3   0   42.50    4.50
 -23  -3   0   40.60    5.70
 -23   3   0   41.10    4.70
 -23   3   0   25.30    7.10
  23   3   0   43.10    8.20
 -23   3   0   49.00    5.10
 -23   3   0   50.19    8.70
 -23   3   0   35.00    6.90
 -23   3   0   48.50   10.90
 -23   3   0   46.80    9.00
  23   3   0   49.99    7.80
  23   3   0   44.60   10.20
 -25  -3   0   16.30    2.70
  25  -3   0    4.90    5.50
  25  -3   0   13.90    2.80
 -25  -3   0   14.00    4.00
 -25  -3   0   21.10    3.80
  25  -3   0   16.90    5.70
  25  -3   0   13.30    3.20
 -25  -3   0   15.40    3.50
  25   3   0   14.80    5.80
  25   3   0   21.30    5.10
 -25   3   0   14.40    4.40
 -25   3   0   18.10    5.70
  25   3   0   14.90    6.00
 -25   3   0   17.40    5.40
  25   3   0    7.90    4.10
 -25   3   0   16.60    6.40
 -25   3   0   14.70    2.80
 -27  -3   0    7.60    2.60
 -27  -3   0    8.60    3.30
  27  -3   0    7.30    2.20
  27  -3   0    3.90    2.30
  27  -3   0    5.50    1.90
 -27   3   0    8.10    2.90
 -27   3   0    7.40    2.20
 -27   3   0    5.70    3.10
  27   3   0    4.10    3.70
  27   3   0    9.20    3.60
 -27   3   0    6.60    3.80
  27   3   0    6.40    3.40
  27   3   0    5.90    4.10
   0  -4   0   13.40    4.80
   0  -4   0   10.10    4.20
   0  -4   0    9.00    4.00
   0   4   0   12.30    7.20
   0   4   0   11.50    8.60
   0   4   0   13.80    9.80
   2  -4   0   17.20    7.20
   2  -4   0    7.50    3.90
   2  -4   0    7.90    4.30
  -2  -4   0    9.00    3.10
  -2  -4   0   12.10    9.70
   2  -4   0   16.20    6.10
   2   4   0   17.90    7.30
  -2   4   0   13.40   10.00
   2   4   0   19.60   10.60
   2   4   0   20.30   13.50
  -2   4   0    7.50    6.10
  -2   4   0    9.00    9.90
  -2   4   0   15.40    6.60
  -2   4   0   16.30    9.30
   2   4   0    8.30    5.90
   4  -4   0   42.20   11.70
   4  -4   0   25.90    8.20
   4  -4   0   29.90    7.50
   4  -4   0   22.80    9.70
  -4  -4   0   26.90    6.40
  -4   4   0   31.50   13.70
   4   4   0   34.10    8.90
   4   4   0   36.40    6.20
  -4   4   0   35.60   11.70
  -4   4   0   29.20    5.70
   4   4   0   30.90    5.70
  -4   4   0   32.30   12.70
  -4   4   0   38.20    7.70
   4   4   0   50.39   18.90
   4   4   0   34.60   14.60
  -4   4   0   27.20    6.90
  -4   4   0   52.59   14.50
   6  -4   0   25.90    8.70
   6  -4   0   27.90    6.70
  -6  -4   0   18.60    3.60
  -6  -4   0   26.30    6.30
   6  -4   0   19.20    8.80
  -6   4   0   40.20   14.50
  -6   4   0   24.50    6.70
  -6   4   0   20.30   10.60
   6   4   0   17.50    6.10
  -6   4   0   25.90   10.10
   6   4   0   33.60    7.30
   6   4   0   33.80    7.20
   6   4   0   35.30   10.50
  -6   4   0   24.20    6.10
   6   4   0   21.60    7.50
  -6   4   0   13.90    3.90
  -6   4   0   20.50    5.20
   6   4   0   23.20   10.30
   6   4   0   18.90    3.40
   6   4   0   51.99   18.80
   8  -4   0   97.39   26.20
   8  -4   0  111.29    8.00
   8  -4   0  127.49   12.40
  -8  -4   0  128.99    9.70
   8  -4   0  133.49   17.10
  -8   4   0  151.38   25.20
  -8   4   0  113.39   10.50
  -8   4   0  130.59   13.10
  -8   4   0  151.08   15.90
   8   4   0  145.49   25.60
   8   4   0  164.38   30.70
   8   4   0  119.79   12.50
  -8   4   0  134.69   11.90
  -8   4   0  123.49   24.30
  -8   4   0  112.39   15.00
   8   4   0  132.39    8.70
   8   4   0  109.89    8.50
  -8   4   0  105.69   12.50
   8   4   0  122.69   25.90
   8   4   0  155.28   13.40
  -8   4   0  135.69   10.40
  -8   4   0  151.98   26.70
   8   4   0  121.09   12.40
  10  -4   0   54.79   14.50
  10  -4   0   73.69   16.50
  10  -4   0   54.89    5.40
 -10  -4   0   42.70    8.80
  10  -4   0   49.10    8.90
 -10  -4   0   55.39    4.90
 -10   4   0   19.40   19.80
  10   4   0   50.19    4.80
 -10   4   0   64.19    8.50
  10   4   0   80.19   12.90
  10   4   0   62.89    5.00
 -10   4   0   42.20    9.80
  10   4   0   90.59   21.30
 -10   4   0   67.09   11.20
  10   4   0   64.39    9.70
  10   4   0   55.29   23.70
  10   4   0   44.50   10.70
  10   4   0   81.09   11.30
 -10   4   0   53.19    7.70
 -10   4   0   77.69   21.00
 -10   4   0   67.89   11.00
 -10   4   0   55.49    5.40
  10   4   0   57.29   21.40
 -10   4   0   56.89    6.20
  10   4   0   50.69    9.00
 -10   4   0   58.89    7.40
 -10   4   0   44.50    9.30
  12  -4   0   51.09    5.70
 -12  -4   0   53.79    5.10
 -12  -4   0   46.70    4.80
  12  -4   0   38.60   10.20
  12  -4   0   67.09   15.60
 -12  -4   0   63.19    6.70
  12  -4   0   55.59    5.00
 -12  -4   0   48.90   13.70
 -12   4   0   51.99   17.30
 -12   4   0   53.49    9.60
 -12   4   0   49.40    7.10
 -12   4   0   29.80   16.40
  12   4   0   44.40    4.30
 -12   4   0   51.79    4.90
  12   4   0   63.69   11.10
  12   4   0   48.90    4.50
 -12   4   0   31.80    7.50
 -12   4   0   53.89   10.10
 -12   4   0   77.69   10.80
  12   4   0   55.79    9.30
  12   4   0   67.69   12.60
  12   4   0   68.99   26.40
  12   4   0  121.69   36.40
  12   4   0   66.59   24.60
 -12   4   0   68.19   11.90
  12   4   0   40.90   10.40
 -14  -4   0  199.08   26.10
 -14  -4   0  200.18   22.80
  14  -4   0  203.68   13.30
 -14  -4   0  216.48   15.50
 -14  -4   0  214.88   13.70
  14  -4   0  199.98   27.30
  14  -4   0  223.48   15.10
  14   4   0  231.48   20.90
 -14   4   0  226.68   19.30
  14   4   0  281.57   48.70
  14   4   0  270.57   25.00
  14   4   0  215.58   13.60
 -14   4   0  194.08   37.50
 -14   4   0  196.78   13.20
  14   4   0  251.37   21.30
 -14   4   0  228.48   24.00
  14   4   0  201.28   18.60
 -14   4   0  201.08   15.30
 -14   4   0  243.48   20.10
  14   4   0  185.98   18.80
  14   4   0  240.28   20.90
  14   4   0  143.89   53.39
 -14   4   0  215.88   18.30
  14   4   0  224.98   13.20
 -14   4   0  232.68   32.90
  16  -4   0   25.50    4.20
  16  -4   0   32.50    4.20
  16  -4   0   22.30   12.80
 -16  -4   0   20.90    9.10
 -16  -4   0   34.50   14.00
  16  -4   0   36.00    5.70
 -16  -4   0   26.10    4.00
 -16  -4   0   33.50    5.60
 -16  -4   0   32.50    4.40
 -16  -4   0   32.50    3.80
 -16   4   0   41.80    9.00
  16   4   0   23.00    9.20
  16   4   0   32.20    3.60
  16   4   0   40.90   10.00
 -16   4   0   29.00   12.70
 -16   4   0   31.80    7.50
 -16   4   0   25.10    9.90
  16   4   0   10.50   30.00
  16   4   0   22.50    9.00
 -16   4   0   33.60    4.30
  16   4   0   60.59   26.20
  16   4   0   28.20    8.20
 -16   4   0   38.00   18.90
 -16   4   0   39.80    5.20
 -16   4   0   49.60    9.20
 -18  -4   0   14.70   15.40
 -18  -4   0   39.70    6.20
  18  -4   0   29.20    4.10
 -18  -4   0   40.20    4.70
 -18  -4   0   33.60    4.60
  18  -4   0   41.40    4.70
 -18  -4   0   34.90    4.30
  18  -4   0   40.40    6.50
  18   4   0   37.80    4.00
 -18   4   0   32.50   10.10
 -18   4   0   43.50   22.30
 -18   4   0   57.59    9.00
  18   4   0   30.00    9.70
 -18   4   0   40.20    8.30
  18   4   0   44.70   40.10
 -18   4   0   21.70    6.80
 -18   4   0   28.70   12.10
  18   4   0   28.90    7.70
 -18   4   0   39.30    5.20
  18   4   0   42.10   10.20
 -18   4   0   36.30    4.30
 -20  -4   0   11.60    4.80
  20  -4   0    6.10    2.30
  20  -4   0   10.00    3.70
 -20  -4   0    8.00    2.70
  20  -4   0    7.70    2.80
 -20  -4   0    5.80    2.50
 -20  -4   0    7.80    2.20
 -20   4   0    6.10    5.00
 -20   4   0   14.40    5.80
  20   4   0   20.70    7.30
  20   4   0    2.60    4.60
 -20   4   0    8.50    3.20
 -20   4   0   14.20    4.50
 -20   4   0   20.40    7.30
  20   4   0   10.60    2.70
  20   4   0    8.80    4.20
  20   4   0   11.80    5.10
 -20   4   0    6.90    2.40
 -20   4   0    5.80    7.00
 -22  -4   0   10.90    3.70
 -22  -4   0    7.50    3.00
 -22  -4   0   15.00    3.00
  22  -4   0   14.80    6.30
  22  -4   0   14.80    2.90
 -22  -4   0   13.90    3.40
  22  -4   0   14.80    3.50
 -22   4   0   14.30    2.90
  22   4   0    6.00    4.00
 -22   4   0   10.40    2.70
 -22   4   0   16.40    6.10
  22   4   0   21.40    5.30
  22   4   0    6.70    4.60
 -22   4   0   12.50    5.20
 -22   4   0   15.80    5.90
  24  -4   0   11.00    3.00
  24  -4   0   24.00    5.80
  24  -4   0   19.80    3.00
 -24  -4   0   14.90    2.70
 -24  -4   0    9.20    3.10
 -24  -4   0    9.40    3.10
 -24   4   0   15.70    2.80
  24   4   0   13.00    5.10
  24   4   0   13.20    5.70
  24   4   0   16.70    4.70
 -24   4   0   16.10    5.20
 -24   4   0   15.70    5.10
 -24   4   0    6.30    4.70
  26  -4   0   23.00    3.10
 -26  -4   0   19.30    2.20
 -26  -4   0   22.40    3.10
  26  -4   0   15.60    3.40
 -26  -4   0   19.80    3.50
  26  -4   0   26.90    2.80
 -26   4   0   17.90    5.20
  26   4   0   14.10    4.80
  26   4   0   22.70    3.90
 -26   4   0   19.90    2.30
 -26   4   0   13.70    5.50
  26   4   0   21.40    4.80
  26   4   0   22.80    4.20
  -1  -5   0   12.30    7.50
   1  -5   0   15.00    8.50
  -1   5   0    1.40    6.80
   1   5   0   15.00    4.50
   1   5   0    9.40    3.90
   1   5   0    9.50    3.10
  -1   5   0    1.70    3.00
  -1   5   0    4.00    7.00
  -1   5   0    5.50    4.00
   1   5   0    4.30    2.70
   1   5   0    2.20    7.70
  -1   5   0    6.00    2.60
  -1   5   0    7.10    3.00
   1   5   0    4.60    2.40
  -1   5   0    2.80    2.90
  -1   5   0    7.90    3.90
  -1   5   0   -0.70    4.00
   1   5   0    6.00    5.30
   1   5   0    2.40    4.10
   1   5   0    3.90   14.00
  -1   5   0   35.30   14.30
   1   5   0    3.80    9.90
   3  -5   0    1.20   10.00
  -3  -5   0   41.00   12.70
  -3  -5   0   34.90    4.60
  -3   5   0   36.10    6.10
  -3   5   0   20.40    6.50
   3   5   0   35.00    7.90
  -3   5   0   26.50    4.60
   3   5   0   34.30    6.70
  -3   5   0   31.10   13.90
  -3   5   0   22.10    5.30
  -3   5   0   33.20    7.10
  -3   5   0   18.00   11.70
   3   5   0   28.20    8.80
  -3   5   0   24.60    5.90
   3   5   0   23.00   11.00
   3   5   0   27.60   15.80
   3   5   0   22.40    4.00
  -3   5   0   43.90   19.40
   3   5   0   23.50    5.30
  -3   5   0   36.40    7.30
   3   5   0   19.00    5.70
   3   5   0   22.50    4.70
   3   5   0   26.10   16.20
  -3   5   0   43.80   16.90
  -5  -5   0   12.40    7.70
   5  -5   0    5.90    9.80
   5  -5   0   18.70    8.20
  -5  -5   0   19.90    4.10
   5   5   0   12.50    3.80
   5   5   0   18.90    6.50
  -5   5   0    8.80    4.10
   5   5   0   22.90    5.80
  -5   5   0    8.00   12.10
   5   5   0   22.20   12.70
  -5   5   0   17.20    6.00
   5   5   0   14.90    2.80
   5   5   0   36.50   20.90
  -5   5   0   -4.40    9.60
  -5   5   0   23.10    6.80
   5   5   0    6.30    6.80
  -5   5   0   11.90    4.00
   5   5   0   10.30    4.60
  -5   5   0   11.50    5.00
  -5   5   0   15.10    5.50
  -5   5   0   19.40    7.20
  -5   5   0    7.50   11.10
   5   5   0   13.00   10.50
  -5   5   0   21.30   15.00
   5   5   0    6.40    5.80
  -7  -5   0   11.90    3.90
   7  -5   0   -4.30   10.00
  -7  -5   0   18.90    3.70
  -7  -5   0   -1.90    5.70
   7   5   0    8.50    4.40
  -7   5   0   12.00    4.00
   7   5   0    5.00    5.70
   7   5   0    9.70    2.40
  -7   5   0   19.90    5.00
  -7   5   0    7.30   12.30
  -7   5   0   10.10   11.00
  -7   5   0    5.10    4.40
   7   5   0    2.60    9.40
   7   5   0   17.60   10.80
   7   5   0    5.30   24.90
  -7   5   0   14.00    4.50
  -7   5   0    7.60    4.40
   7   5   0   17.30    6.00
   7   5   0    9.10    3.00
   7   5   0   10.40    5.00
  -7   5   0   11.20    4.00
  -7   5   0   15.70    5.80
  -7   5   0   20.60   16.80
  -9  -5   0   16.50    7.90
   9  -5   0   16.90    3.20
  -9  -5   0   16.00    4.50
  -9  -5   0   25.60    3.70
   9   5   0   17.00    2.90
  -9   5   0    6.20   12.40
   9   5   0   14.30   21.70
   9   5   0   22.60   14.80
   9   5   0   24.10    7.90
  -9   5   0   20.90   12.90
  -9   5   0   20.50    4.60
   9   5   0   19.40    6.70
  -9   5   0   20.80    7.30
   9   5   0   21.90    6.90
   9   5   0   24.00    6.20
   9   5   0   21.60    7.50
  -9   5   0   21.20    5.50
   9   5   0   18.70    2.80
  -9   5   0   25.90    3.80
  -9   5   0   22.80    5.20
  11  -5   0   18.70   13.90
 -11  -5   0    5.40    2.40
  11  -5   0    0.70    2.30
 -11  -5   0    2.80    1.60
 -11  -5   0   -9.50    7.30
  11   5   0    1.10    4.30
 -11   5   0    2.00    2.90
  11   5   0   14.10   32.90
 -11   5   0   -4.60   17.20
  11   5   0    3.50    4.00
  11   5   0   21.90   16.50
  11   5   0    8.30    3.80
 -11   5   0    4.30    3.40
 -11   5   0   -0.30    4.00
  11   5   0    3.90    4.00
  11   5   0    1.10    1.20
 -11   5   0    0.00    6.90
  11   5   0    7.50    2.00
  11   5   0    1.70    3.60
  13  -5   0    7.10   12.60
 -13  -5   0    3.80    7.00
 -13  -5   0    9.50    3.00
 -13  -5   0   11.40    2.60
 -13  -5   0   13.00    3.20
  13  -5   0   21.50    4.00
 -13   5   0   16.00    7.70
  13   5   0   21.40    6.60
  13   5   0    8.90    2.60
  13   5   0   13.80    2.40
  13   5   0   16.60    5.00
 -13   5   0   16.70    3.00
 -13   5   0   12.80    6.00
  13   5   0   32.60   23.60
 -13   5   0   16.80    4.80
 -13   5   0   11.60    3.70
  13   5   0   16.80    5.00
  13   5   0   23.00    7.20
  13   5   0   16.10    7.60
 -13   5   0   13.50   10.00
 -13   5   0    8.00   23.90
 -15  -5   0   20.40    3.30
 -15  -5   0   30.40    5.40
  15  -5   0   22.40    5.30
  15  -5   0   22.00    3.80
 -15  -5   0   14.30    3.50
 -15  -5   0   22.50    3.90
  15   5   0   32.10    4.10
  15   5   0   30.40    9.80
  15   5   0   17.90    6.90
  15   5   0   25.80    7.10
  15   5   0   40.30   11.30
 -15   5   0   16.60    5.50
 -15   5   0   23.10    9.70
 -15   5   0   21.70    6.30
 -15   5   0   26.50    5.80
  15   5   0   21.00    8.00
 -15   5   0   24.30   12.00
 -15   5   0   22.90    3.70
  17  -5   0    5.10    2.20
 -17  -5   0    9.10    3.10
 -17  -5   0    5.60    2.30
 -17  -5   0    4.30    1.90
 -17  -5   0    7.40    3.90
  17  -5   0    6.10    2.10
  17  -5   0   13.50    4.80
 -17   5   0    9.30    3.20
  17   5   0    6.60    5.20
  17   5   0    7.00    2.10
  17   5   0    5.50    3.40
 -17   5   0    8.50    5.40
 -17   5   0    3.50    4.10
 -17   5   0   -0.10    5.60
 -17   5   0    5.90    2.40
  17   5   0   10.30    4.30
  17   5   0    9.30    4.80
 -17   5   0    2.10    3.20
  19  -5   0    9.20    2.10
 -19  -5   0    8.50    2.40
 -19  -5   0   15.20    3.60
  19  -5   0    5.10    3.00
 -19  -5   0    8.30    4.70
  19  -5   0    6.30    2.10
 -19  -5   0    3.60    1.70
 -19   5   0    4.50    3.30
  19   5   0    8.40    3.20
  19   5   0   12.70    5.10
 -19   5   0    8.20    2.30
 -19   5   0    4.40    6.20
  19   5   0    9.30    5.40
 -19   5   0    4.20    5.50
 -19   5   0    9.50    5.60
 -19   5   0    6.90    2.20
  19   5   0    6.60    2.10
  19   5   0    8.70    4.00
  21  -5   0    5.20    2.70
 -21  -5   0    8.00    2.60
 -21  -5   0    2.60    2.80
  21  -5   0    4.70    2.50
 -21  -5   0    7.30    2.40
  21  -5   0    2.90    3.40
  21   5   0    6.90    3.00
  21   5   0    6.30    4.20
 -21   5   0    7.40    2.40
 -21   5   0    5.80    1.80
 -21   5   0    5.70    3.00
 -21   5   0    5.50    4.60
  21   5   0    3.60    3.50
  21   5   0   11.30    4.50
  23  -5   0    2.80    1.60
 -23  -5   0    2.00    1.20
 -23  -5   0    2.10    1.70
  23  -5   0    5.10    1.40
 -23  -5   0    4.40    1.70
  23  -5   0    5.10    1.80
 -23   5   0    0.10    2.30
  23   5   0    4.90    3.70
 -23   5   0    1.40    2.30
  23   5   0    5.20    2.40
  23   5   0    5.50    3.30
  23   5   0    5.00    3.00
 -23   5   0    3.20    1.50
   0   6   0  241.18   19.00
   0   6   0  272.77   20.60
   0   6   0  237.58   17.00
   0   6   0  262.77   46.80
   0   6   0  247.18   15.60
   0   6   0  268.47   19.40
   0   6   0  240.88   31.60
  -2  -6   0   45.80    7.40
   2   6   0   66.19    7.40
  -2   6   0   52.19    5.80
   2   6   0   53.19   10.30
  -2   6   0   44.60    6.50
  -2   6   0   50.09    8.00
  -2   6   0   57.49    9.00
   2   6   0   57.39    8.10
   2   6   0   62.99    9.70
  -2   6   0   55.99    7.60
   2   6   0   56.09    5.20
   2   6   0   58.39    8.70
  -2   6   0   51.89    6.30
  -2   6   0   44.80   15.10
  -2   6   0   31.20   22.80
   2   6   0   39.50   25.80
   2   6   0   28.50   12.00
  -2   6   0   56.49    8.70
  -4  -6   0   16.00   14.90
  -4  -6   0   42.80    6.20
   4   6   0    7.50   14.50
  -4   6   0   39.80    7.70
  -4   6   0   61.49   16.60
  -4   6   0   40.20    5.70
   4   6   0   25.60   10.20
   4   6   0   46.70    9.10
  -4   6   0   39.30    6.60
   4   6   0   30.00    7.90
  -4   6   0   35.70   20.10
  -4   6   0   13.50   20.80
   4   6   0   35.20    4.00
  -4   6   0   25.10    7.00
  -4   6   0   38.00    5.20
  -4   6   0   35.10    6.20
  -4   6   0   46.70    8.30
   4   6   0   34.00    6.70
  -6  -6   0   -0.90    1.90
  -6  -6   0    5.40    2.40
  -6   6   0   14.10    4.90
   6   6   0   -0.40    3.30
   6   6   0   -2.10    3.40
  -6   6   0    2.20    2.40
  -6   6   0    4.40    3.40
  -6   6   0    3.50    3.40
  -6   6   0   -1.60    2.10
   6   6   0    3.20    1.50
  -6   6   0    3.00    3.70
   6   6   0    3.70    2.10
   6   6   0    7.60    4.10
  -6   6   0    2.60    8.80
  -8  -6   0   73.49    7.00
  -8  -6   0   84.99    8.20
  -8   6   0   86.59    9.10
  -8   6   0   80.29    6.70
  -8   6   0   89.39    8.60
   8   6   0   92.69    6.50
   8   6   0  104.19   10.20
   8   6   0   92.79   12.00
  -8   6   0  105.29   13.00
  -8   6   0   85.39    8.80
   8   6   0   81.69   12.90
  -8   6   0   85.89   22.40
   8   6   0   85.49   11.40
  -8   6   0   77.09    9.20
 -10  -6   0   10.40    3.90
 -10  -6   0   19.00    5.10
 -10   6   0    9.70    3.90
  10   6   0   22.50    6.30
 -10   6   0   13.70    9.90
 -10   6   0   10.00    4.70
  10   6   0   24.40    8.10
 -10   6   0   13.70    4.20
  10   6   0   14.10    2.30
  10   6   0   25.30    6.40
  10   6   0   17.40    6.40
 -10   6   0   18.30    3.00
  12  -6   0   10.40    4.20
 -12  -6   0   11.30    4.50
 -12  -6   0    8.60    2.20
 -12  -6   0    7.90    2.90
 -12   6   0   12.00    3.70
 -12   6   0   11.20    2.50
 -12   6   0    4.10    3.90
  12   6   0    8.60    2.00
  12   6   0   16.80    5.60
  12   6   0   10.90    3.90
  12   6   0   18.00    5.10
  12   6   0   10.20    5.80
 -12   6   0    0.40    6.60
 -12   6   0    7.10    3.40
 -14  -6   0   51.89    6.80
 -14  -6   0   71.29    7.70
 -14  -6   0   51.19    5.50
  14   6   0   55.69    8.80
  14   6   0   54.89   11.50
  14   6   0   43.80    7.50
 -14   6   0   58.79    4.90
  14   6   0   63.99    6.90
 -14   6   0   57.89   10.20
 -14   6   0   55.89    7.50
 -14   6   0   63.79    5.80
 -14   6   0   62.09   15.20
  14   6   0   55.19    4.40
 -16  -6   0   11.70    2.70
 -16  -6   0   13.60    4.70
  16  -6   0   18.00    4.00
 -16  -6   0    8.40    2.80
 -16   6   0   10.00    1.90
  16   6   0   15.00    5.00
 -16   6   0   10.80    3.20
 -16   6   0    6.70    3.20
  16   6   0    7.10    5.10
  16   6   0    9.50    3.50
  16   6   0    8.40    2.40
 -16   6   0    0.80    5.10
 -16   6   0   10.80    5.50
 -18  -6   0   11.10    2.30
  18  -6   0   14.80    4.60
 -18  -6   0    6.80    2.50
 -18   6   0    3.20    2.70
 -18   6   0   10.30    2.10
 -18   6   0    9.50    1.90
  18   6   0    6.60    4.10
  18   6   0    8.40    1.70
  18   6   0    9.10    2.90
  18   6   0   10.20    3.70
 -20  -6   0   18.60    3.10
 -20  -6   0   15.80    3.00
 -20  -6   0   18.50    3.50
 -20   6   0   19.10    2.50
 -20   6   0    9.20    4.10
  20   6   0   22.70    4.20
  20   6   0   16.40    3.20
  -1   7   0   36.80    5.40
  -1   7   0   36.50    6.30
   1   7   0   41.50    6.90
   1   7   0   40.60    5.60
   1   7   0   31.20    3.10
   1   7   0   30.30    6.30
  -3   7   0   22.10   10.00
  -3   7   0   44.60    5.60
   3   7   0   42.50    3.40
   3   7   0   40.80    6.90
  -3   7   0   36.20    6.40
  -3   7   0   32.30    4.90
  -3   7   0   39.80    4.00
  -3   7   0   40.90    6.40
   3   7   0   46.90    5.80
   3   7   0   41.80    6.20
   5   7   0    4.00    2.50
  -5   7   0    1.70    2.00
  -5   7   0   -0.80    3.10
   5   7   0    5.70    2.80
  -5   7   0    3.10    1.40
   5   7   0    4.50    2.90
   5   7   0    2.20    1.00
  -5   7   0    1.70    1.90
  -5   7   0    3.50    3.00
  -7   7   0   17.40    4.90
  -7   7   0   12.90    3.00
   7   7   0   12.90    1.80
   7   7   0   13.50    3.70
  -7   7   0   13.60    2.40
   7   7   0   19.00    5.10
  -7   7   0    8.70    7.00
  -9  -7   0   11.00    3.60
  -9   7   0    1.30    1.50
  -9   7   0    2.90    2.60
   9   7   0    5.60    3.20
   9   7   0    3.80    2.30
   9   7   0    1.90    3.20
   9   7   0    2.30    0.90
  -9   7   0   -0.10    3.60
  -9   7   0    3.60    1.50
 -11  -7   0    4.10    1.90
  11   7   0    9.10    1.60
  11   7   0   15.20    3.50
 -11   7   0    2.70    4.00
 -11   7   0    8.90    2.20
 -11   7   0    8.80    3.40
  11   7   0   14.60    4.40
  11   7   0   11.20    3.80
 -11   7   0    7.10    2.00
 -13  -7   0    5.60    1.60
 -13  -7   0    7.90    2.10
 -13   7   0    2.40    4.10
  13   7   0   15.40    4.70
  13   7   0    8.80    1.50
 -13   7   0    7.60    2.80
 -13   7   0    8.90    2.00
 -15  -7   0    1.20    1.30
 -15   7   0    0.50    0.70
  15   7   0    1.80    1.80
 -15   7   0    0.50    1.30
 -30   0   1    1.70    2.40
  30   0  -1   -0.60    1.50
 -30   0   1   -0.60    2.40
 -30   0   1    0.50    2.00
  30   0  -1    0.60    2.50
 -28   0   1   40.70    5.70
  28   0  -1   30.30    5.70
 -28   0   1   32.30    6.50
  28   0  -1   27.90    7.10
  26   0  -1   50.49    7.30
  26   0  -1   45.50    4.20
 -26   0   1   47.80    6.80
  26   0  -1   52.79    9.40
 -26   0   1   46.10    7.70
 -26   0   1   37.00    8.20
 -24   0   1  103.09   12.20
  24   0  -1  117.39    8.10
  24   0  -1  121.89   11.80
  24   0  -1  131.99   33.50
 -24   0   1  118.49   10.60
 -24   0   1   69.99   25.00
  24   0  -1  111.59    8.70
  24   0  -1  105.89   14.00
  24   0  -1  101.19   13.40
 -22   0   1    8.10    3.20
 -22   0   1   12.60    4.80
  22   0  -1   20.80    7.20
  22   0  -1   -9.50   10.60
  22   0  -1   16.10    9.00
  22   0  -1    4.80    4.20
 -22   0   1    6.80    8.80
 -22   0   1    4.60    2.50
 -22   0   1   18.10    5.60
  22   0  -1   10.70    2.90
 -22   0   1    7.20    5.30
  22   0  -1   13.70    5.10
  20   0  -1  627.24   44.20
  20   0  -1  500.75   39.70
 -20   0   1  608.44   30.00
  20   0  -1  543.75   30.00
 -20   0   1  533.95   33.50
 -20   0   1  519.25   31.10
  20   0  -1  513.35   32.70
 -20   0   1  471.45   33.60
  20   0  -1  496.15   35.50
 -20   0   1  462.65   41.80
  20   0  -1  549.95   29.60
 -18   0   1   36.50    5.20
  18   0  -1   20.50    8.70
  18   0  -1   43.20    6.10
  18   0  -1   23.60    7.20
  18   0  -1   18.50   12.60
 -18   0   1   36.00    4.50
 -18   0   1   34.00    6.90
 -18   0   1   30.00    3.80
  18   0  -1   40.70   10.70
  18   0  -1  157.28   67.99
  16   0  -1   57.39   32.80
  16   0  -1   91.29   10.00
  16   0  -1   97.79    7.00
  16   0  -1   58.49   17.30
 -16   0   1   95.79   12.60
 -16   0   1   90.09    9.10
  16   0  -1  125.49   14.10
  16   0  -1   94.89   12.90
  16   0  -1  104.49    7.50
 -16   0   1   99.29    7.80
 -16   0   1  121.99   12.00
  16   0  -1   97.59    8.90
  16   0  -1  106.09   16.80
 -16   0   1   95.09   10.40
  14   0  -1   83.89    7.40
  14   0  -1   87.29   10.40
  14   0  -1   81.29   13.00
  14   0  -1   90.19    6.30
  14   0  -1   61.99   13.80
  14   0  -1   83.69   34.10
  14   0  -1   75.49   11.10
 -14   0   1   76.39    7.40
 -14   0   1   89.69   10.60
 -14   0   1   79.99    9.00
 -12   0   1  176.48   18.60
  12   0  -1  202.58   15.80
  12   0  -1  198.88   18.60
  12   0  -1  212.78   35.80
  12   0  -1  171.08   16.60
  12   0  -1  183.58   20.00
 -12   0   1  199.78   15.60
  12   0  -1  210.08   12.90
  10   0  -1   82.59    6.50
 -10   0   1   92.89    8.30
 -10   0   1   76.79   11.20
  10   0  -1   80.39    9.70
  10   0  -1   91.49    8.40
  10   0  -1   81.89    9.80
 -10   0   1   83.19   10.70
   8   0  -1 1502.35   78.29
   8   0  -1 1570.24   97.59
  -8   0   1 1460.85   78.09
  -8   0   1 1366.36   81.19
   8   0  -1 1423.46   77.29
  -8   0   1 1570.64   81.49
  -6   0   1  563.74   29.60
   6   0  -1  550.94   31.30
  -6   0   1  497.75   31.40
   6   0  -1  527.95   41.90
   6   0  -1  534.65   29.40
  -6   0   1  521.75   31.20
  -4   0   1   32.60    4.00
  -4   0   1   31.10    3.60
  -4   0   1   35.50    3.20
   4   0  -1   41.70    9.20
  -2   0   1  258.97   15.50
   2   0  -1  306.27   15.40
  -2   0   1  296.97   15.70
   2   0  -1  265.07   15.80
   2   0  -1  272.17   15.80
   2   0  -1  308.37   16.10
  -2   0   1  318.77   16.40
  -2   0   1  280.57   16.10
   2   0  -1  240.78   19.70
   2   0  -1  300.77   15.70
   0   0   1   90.39    5.90
   0   0   1   84.49    6.90
   0   0   1   88.49    8.90
   0   0  -1  110.29    5.90
   0   0  -1  116.29    5.90
   2   0   1  670.03   33.20
  -2   0  -1  577.54   32.60
   2   0   1  532.35   32.30
  -2   0  -1  613.04   33.50
   2   0   1  649.93   38.00
  -2   0  -1  570.54   33.00
   2   0   1  650.33   33.40
   2   0   1  596.14   32.30
  -2   0  -1  656.83   32.20
  -2   0  -1  593.94   32.60
   2   0   1  641.94   32.70
   4   0   1  175.28   12.30
   4   0   1  172.38   18.00
  -4   0  -1  154.58   10.60
   4   0   1  151.78   10.10
  -4   0  -1  137.09   12.20
   4   0   1  169.18   11.50
  -4   0  -1  154.08   10.30
   4   0   1  167.08   11.20
   6   0   1   87.19    9.70
   6   0   1   95.79    8.90
   6   0   1  108.99    9.70
  -6   0  -1  113.49    8.10
  -6   0  -1   98.49    8.70
   8   0   1  759.52   48.20
   8   0   1  817.32   44.80
  -8   0  -1  863.11   44.10
   8   0   1  816.52   47.60
   8   0   1  805.32   46.10
  -8   0  -1  783.02   44.90
  -8   0  -1  730.33   45.60
   8   0   1  693.83   41.90
   8   0   1  889.81   62.69
 -10   0  -1    1.70    3.00
  10   0   1    6.60   27.60
 -10   0  -1    4.10    2.10
  10   0   1    4.80    3.00
  10   0   1    9.70    2.70
 -10   0  -1    6.40    2.90
  10   0   1    4.80    4.20
  12   0   1  733.23   43.40
  12   0   1  659.13   63.49
  12   0   1  695.23   47.70
  12   0   1  699.43   47.70
  12   0   1  685.73   42.50
 -12   0  -1  687.83   43.20
 -12   0  -1  713.83   39.60
  12   0   1  627.04   36.40
  12   0   1  686.03   38.10
 -12   0  -1  653.63   39.10
  14   0   1   49.70    4.70
  14   0   1   58.79    9.60
  14   0   1   37.50   10.60
  14   0   1   19.80   27.90
 -14   0  -1   57.39    9.70
  14   0   1   51.99    6.00
  14   0   1   57.59    9.20
  14   0   1   45.70   12.50
 -14   0  -1   43.30    5.90
  16   0   1   79.49   14.40
 -16   0  -1   69.99    8.70
 -16   0  -1   73.19    6.70
 -16   0  -1   92.09    7.40
  16   0   1   66.19   12.60
  16   0   1   82.89    6.30
  16   0   1   55.29   17.40
  16   0   1  129.49   54.09
  16   0   1   84.79    9.90
 -16   0  -1   78.29   12.90
  16   0   1   85.19    6.70
 -16   0  -1   79.29    9.80
  16   0   1   85.29    8.30
 -18   0  -1  205.78   21.50
  18   0   1  268.67   26.30
 -18   0  -1  252.97   14.80
  18   0   1  276.27   19.30
  18   0   1  256.37   15.80
 -18   0  -1  271.57   16.10
 -18   0  -1  272.47   17.50
 -18   0  -1  275.17   19.70
  18   0   1  274.27   93.69
  18   0   1  258.27   16.10
  18   0   1  292.17   25.60
  18   0   1  223.08   45.50
  18   0   1  233.18   18.40
 -18   0  -1  258.77   27.90
  20   0   1 1053.59   62.09
 -20   0  -1 1069.69   63.09
  20   0   1 1047.60   58.99
 -20   0  -1 1096.99   59.59
 -20   0  -1 1051.59   58.69
 -20   0  -1 1220.28   68.29
  20   0   1 1239.28   68.19
  20   0   1 1125.99   74.79
  20   0   1 1051.29   61.19
  20   0   1 1105.79   71.99
 -22   0  -1   69.59    9.80
  22   0   1   80.39    7.40
  22   0   1   84.39    9.90
 -22   0  -1   73.49    6.70
  22   0   1   79.79    6.60
 -22   0  -1   69.09    8.00
 -22   0  -1   77.89    8.90
 -22   0  -1   79.59   10.50
  22   0   1   51.89   10.00
  22   0   1   67.59   19.40
  22   0   1   96.19   12.60
 -24   0  -1  127.29   13.70
 -24   0  -1  104.89   15.80
 -24   0  -1  121.19   11.60
  24   0   1  128.59   12.90
  24   0   1  119.79   15.20
  24   0   1  121.49    9.60
  24   0   1  133.49    9.30
  26   0   1   45.60    4.20
  26   0   1   50.39    7.60
 -26   0  -1   41.60    6.70
 -26   0  -1   44.70    7.90
 -28   0  -1   -2.80    2.10
  28   0   1    0.90    2.40
  28   0   1    2.20    2.50
  28   0   1    0.70    1.80
 -28   0  -1    1.30    3.30
 -28   0  -1    4.80    3.00
 -30   0  -1    3.60    2.50
  30   0   1    7.30    3.10
 -30   0  -1    5.30    2.80
  30   0   1    4.30    2.80
 -30   0  -1    6.60    3.10
 -31  -1   1    2.60    2.00
 -31  -1   1    3.90    1.80
  31  -1  -1    3.00    2.20
  31   1  -1    1.60    2.30
 -31   1   1    0.30    1.60
  31   1  -1    3.30    2.20
 -31   1   1   11.20    4.40
 -31   1   1    2.30    2.50
 -31   1   1    4.10    2.20
  29  -1  -1    2.90    1.40
  29  -1  -1    3.80    2.30
 -29  -1   1    8.50    3.70
  29  -1  -1    5.40    2.90
 -29  -1   1    2.70    2.20
  29   1  -1    2.80    2.60
 -29   1   1    2.30    2.30
  29   1  -1    2.90    2.20
 -29   1   1    2.40    2.70
 -29   1   1    0.10    2.80
  27  -1  -1    5.60    3.80
  27  -1  -1   -1.10    9.20
  27  -1  -1   11.10    2.50
  27  -1  -1    5.30    2.90
 -27  -1   1    5.00    2.70
  27  -1  -1    8.50    3.40
 -27  -1   1    6.60    3.70
 -27  -1   1    2.80    2.90
 -27   1   1    6.70    4.50
 -27   1   1    6.20    3.30
  27   1  -1   17.40    5.80
 -27   1   1    8.00    3.30
 -27   1   1    5.90    3.70
  27   1  -1    3.50    3.40
  27   1  -1    4.20    3.80
 -25  -1   1    7.10    2.80
  25  -1  -1    6.40    3.30
  25  -1  -1    6.00    4.30
  25  -1  -1    4.80    2.20
  25  -1  -1    4.70    3.60
 -25  -1   1    3.80    2.40
 -25   1   1    7.20    3.60
  25   1  -1   11.50    4.20
 -25   1   1    9.30    3.00
  25   1  -1    8.40    5.50
 -25   1   1   18.30    6.10
  25   1  -1   15.40    5.20
 -25   1   1   15.90    5.00
 -23  -1   1   55.69    8.60
  23  -1  -1   47.70    8.20
  23  -1  -1   51.79    5.20
  23  -1  -1   35.30   22.10
 -23  -1   1   52.89    6.90
 -23  -1   1   50.49    4.60
  23  -1  -1   52.09    5.50
  23  -1  -1   56.19    8.70
  23   1  -1   54.49    7.90
 -23   1   1   55.59    8.80
 -23   1   1   46.70    9.20
 -23   1   1   60.59    7.80
 -23   1   1   56.79    5.40
  23   1  -1   58.59    8.20
  23   1  -1   64.09   10.70
  21  -1  -1    6.90    8.30
  21  -1  -1   21.20    5.70
 -21  -1   1   23.20    3.20
 -21  -1   1   16.20    4.10
  21  -1  -1   33.30   13.70
  21  -1  -1   19.60    3.20
 -21  -1   1   17.00    9.60
  21  -1  -1   18.40    5.50
 -21  -1   1   23.30    4.40
  21  -1  -1   20.20    3.60
 -21  -1   1   15.30    6.00
 -21   1   1   24.60    3.70
  21   1  -1   25.40    5.30
  21   1  -1   24.00    5.70
  21   1  -1   14.20   10.30
 -21   1   1   18.50    5.60
  21   1  -1   28.00   25.80
  21   1  -1   -6.60   58.09
 -21   1   1   17.90    6.80
 -21   1   1   -0.90   10.40
 -21   1   1   21.70   10.40
  21   1  -1   29.30    7.00
 -21   1   1   21.10    4.20
  21   1  -1   20.20    3.60
 -21   1   1   14.20    3.60
  19  -1  -1  206.28   22.20
 -19  -1   1  191.28   15.60
 -19  -1   1  163.48   19.80
 -19  -1   1  204.18   12.70
 -19  -1   1  212.38   12.40
 -19  -1   1  189.68   14.50
  19  -1  -1  208.88   15.50
 -19  -1   1  208.18   22.40
  19  -1  -1  231.08   17.30
 -19  -1   1  206.58   13.70
  19  -1  -1  187.38   12.70
  19  -1  -1  199.98   13.20
 -19   1   1  206.48   15.30
  19   1  -1  234.38   18.70
  19   1  -1  203.68   15.80
  19   1  -1  222.78   21.80
  19   1  -1  139.99   82.59
 -19   1   1  227.98   18.60
 -19   1   1  203.98   13.50
  19   1  -1  202.08   13.80
  19   1  -1  202.58   12.70
 -19   1   1  230.98   17.20
  19   1  -1  210.48   25.10
 -19   1   1  217.58   13.20
 -19   1   1  188.28   25.30
  17  -1  -1  189.28   15.20
 -17  -1   1  207.78   18.90
  17  -1  -1  182.28   11.50
  17  -1  -1  177.58   20.40
 -17  -1   1  182.28   10.80
  17  -1  -1  164.48   11.30
  17  -1  -1  178.98   13.20
 -17  -1   1  190.58   11.80
 -17  -1   1  176.98   18.20
  17  -1  -1  166.18   17.10
 -17  -1   1  163.68   12.40
  17  -1  -1  196.38   29.00
  17  -1  -1  177.58   22.90
  17   1  -1  143.79   11.80
  17   1  -1  139.99   44.00
 -17   1   1  214.28   22.70
  17   1  -1  182.28   14.60
 -17   1   1  177.38   11.60
  17   1  -1  173.28   20.90
  17   1  -1  174.58   16.40
 -17   1   1  195.08   15.10
 -17   1   1  177.78   11.60
  17   1  -1  167.68   11.70
  17   1  -1  195.78   19.30
 -17   1   1  190.88   16.60
 -15  -1   1   44.60    4.90
  15  -1  -1   37.20    6.80
  15  -1  -1   40.80    5.10
 -15  -1   1   58.19   10.20
  15  -1  -1   41.60    3.90
  15  -1  -1   44.40    9.80
  15  -1  -1   28.70    9.10
 -15  -1   1   34.70    3.60
 -15  -1   1   25.40   10.50
  15   1  -1   43.90    4.60
 -15   1   1   43.70   10.10
  15   1  -1   43.40   11.40
  15   1  -1   53.29   14.20
  15   1  -1   37.40    8.50
  15   1  -1   38.40    7.00
  13  -1  -1  426.46   58.69
 -13  -1   1  396.66   31.80
  13  -1  -1  414.36   23.30
  13  -1  -1  410.66   24.30
  13  -1  -1  443.16   38.20
  13  -1  -1  418.26   26.80
  13  -1  -1  422.26   32.70
 -13  -1   1  419.26   23.00
  13  -1  -1  421.16   31.00
 -13  -1   1  435.06   27.90
 -13   1   1  477.25   32.40
  13   1  -1  422.86   30.80
  13   1  -1  408.86   25.30
  13   1  -1  448.26   28.70
  13   1  -1  407.96   31.00
  11  -1  -1  812.02   75.59
 -11  -1   1  966.90   54.79
  11  -1  -1  867.31   49.99
 -11  -1   1  871.81   48.20
  11  -1  -1  922.21   54.49
  11  -1  -1  829.82   48.00
 -11  -1   1  962.30   51.39
  11   1  -1  910.81   59.59
  11   1  -1  887.01   49.10
  11   1  -1  971.90   51.99
  11   1  -1  901.31   74.29
  11   1  -1  850.61   54.09
 -11   1   1  974.80   55.09
  11   1  -1  942.91   54.09
  -9  -1   1  935.51   49.50
  -9  -1   1  888.01   51.19
   9  -1  -1  864.31   70.89
   9  -1  -1  948.01   51.99
   9  -1  -1  850.01   46.70
  -9  -1   1  905.01   47.20
   9   1  -1  951.70   52.59
   9   1  -1  876.01   50.99
   9   1  -1  885.21   55.79
   9   1  -1  935.31   49.60
  -9   1   1  824.82   56.89
  -9   1   1  796.82   51.29
   9   1  -1  913.31   68.49
  -7  -1   1  682.83   40.10
  -7  -1   1  792.82   42.50
   7  -1  -1  764.62   43.70
   7  -1  -1  791.62   41.30
  -7  -1   1  731.33   42.20
  -7  -1   1  655.63   43.30
   7   1  -1  808.02   47.30
   7   1  -1  816.32   41.60
  -7   1   1  739.13   57.59
   7   1  -1  784.02   44.30
  -7   1   1  788.72   43.80
   7   1  -1  844.02   58.29
  -7   1   1  760.92   46.50
  -7   1   1  752.22   47.70
  -5  -1   1  196.98   12.40
   5  -1  -1  222.68   14.60
  -5  -1   1  191.58   13.10
  -5   1   1  167.88   12.90
   5   1  -1  199.88   11.50
  -5   1   1  180.18   20.90
   5   1  -1  182.78   11.50
   5   1  -1  235.48   22.50
  -5   1   1  207.28   16.50
   3  -1  -1 2253.47  109.19
  -3  -1   1 2021.50  109.69
   3  -1  -1 2107.89  107.29
  -3  -1   1 2049.89  109.59
   3  -1  -1 2107.19  111.09
  -3  -1   1 2050.19  108.89
  -3   1   1 2165.58  111.49
  -3   1   1 2164.88  114.29
   3   1  -1 1966.10  122.39
   3   1  -1 2123.59  109.59
   3   1  -1 2180.38  112.49
  -3   1   1 1966.60  114.19
  -3   1   1 2196.28  112.59
  -3   1   1 2172.28  112.69
   1  -1  -1  797.82   49.70
  -1  -1   1  870.71   49.50
   1   1  -1  972.70   53.79
  -1   1   1  925.01   54.69
   1   1  -1 1018.20   52.69
  -1   1   1  942.91   52.79
   1   1  -1  922.81   53.29
   1   1  -1  960.90   53.49
  -1   1   1 1034.10   53.69
   1   1  -1 1040.40   50.49
  -1  -1  -1  785.02   46.30
  -1  -1  -1  961.50   46.10
   1  -1   1  846.62   47.00
   1   1   1  979.90   51.59
   1   1   1  776.22   47.60
   1   1   1  770.32   48.60
  -1   1  -1  944.71   51.29
   1   1   1  971.80   50.59
   1   1   1  969.50   51.09
  -1   1  -1  849.12   47.00
   3  -1   1 2624.54  130.09
  -3  -1  -1 2527.35  129.59
  -3  -1  -1 2666.23  130.19
   3  -1   1 2635.24  130.99
  -3  -1  -1 2165.48  129.39
   3  -1   1 2721.23  135.09
  -3   1  -1 2563.64  135.89
   3   1   1 2817.12  134.99
   3   1   1 2578.54  129.79
   3   1   1 2392.36  130.89
  -3   1  -1 2210.78  134.39
   3   1   1 2579.94  129.59
  -3   1  -1 2505.55  135.39
  -3   1  -1 2601.84  132.49
   5  -1   1 1016.20   58.79
  -5  -1  -1 1054.59   52.79
   5  -1   1  954.90   53.59
  -5  -1  -1 1022.70   53.49
   5  -1   1  941.61   51.59
  -5  -1  -1  897.41   55.49
   5   1   1  918.81   54.89
  -5   1  -1 1043.00   58.69
   5   1   1  977.00   57.29
  -5   1  -1  918.01   54.99
  -5   1  -1  969.20   62.79
   5   1   1 1064.59   65.69
   5   1   1 1051.39   52.59
   5   1   1 1035.10   53.59
  -5   1  -1 1035.60   56.19
   7  -1   1  245.98   13.90
  -7  -1  -1  198.58   15.80
   7   1   1  209.18   14.80
  -7   1  -1  228.48   18.20
   7   1   1  229.98   15.50
  -7   1  -1  222.48   25.70
   9  -1   1 1344.07   75.89
   9  -1   1 1370.16   80.39
   9  -1   1 1360.36   73.29
  -9  -1  -1 1413.16   71.29
  -9  -1  -1 1311.07   68.49
  -9  -1  -1 1376.96   74.69
   9  -1   1 1252.67   68.29
   9  -1   1 1255.97   69.69
   9  -1   1 1184.68   90.19
  -9   1  -1 1250.37   74.79
   9   1   1 1387.86   72.69
   9   1   1 1377.86   92.89
   9   1   1 1275.77   74.39
   9   1   1 1374.26   72.59
  -9   1  -1 1154.78   75.79
  11  -1   1  133.79   10.60
  11  -1   1   98.69   15.40
  11  -1   1  164.28   41.90
  11  -1   1  104.39   13.00
 -11   1  -1  115.39   13.50
  11   1   1   94.89   11.50
  11   1   1  116.79   12.20
 -13  -1  -1  268.57   20.80
  13  -1   1  242.88   27.10
 -13  -1  -1  247.38   18.80
  13  -1   1  279.27   20.10
  13  -1   1  288.77   56.19
  13  -1   1  284.77   17.10
  13  -1   1  290.67   24.60
 -13  -1  -1  274.17   21.50
  13  -1   1  252.57   23.50
  13  -1   1  276.57   15.60
 -13  -1  -1  260.07   15.30
  13   1   1  260.07   17.80
  13   1   1  259.37   23.60
 -13   1  -1  276.67   24.70
  13   1   1  242.58   22.40
  13   1   1  306.67   22.60
 -15  -1  -1   81.49   10.50
 -15  -1  -1   97.79    8.10
  15  -1   1  107.79    8.90
  15  -1   1   98.69   12.00
  15  -1   1   93.69   14.10
 -15  -1  -1  109.39   12.20
  15  -1   1  100.49    7.20
  15  -1   1  103.09   16.90
 -15  -1  -1   87.29    7.10
  15  -1   1   92.99   19.00
 -15  -1  -1   99.79    6.90
  15   1   1  120.19   14.00
  15   1   1   95.49   14.80
  15   1   1   92.29    7.80
  15   1   1   80.39   34.10
  15   1   1   99.59   10.50
  15   1   1  108.99   19.40
  15   1   1   72.69   12.50
 -15   1  -1   86.59   12.30
 -15   1  -1   62.99   14.90
 -17  -1  -1   35.10    4.60
  17  -1   1    9.70    6.80
  17  -1   1   53.79   16.90
 -17  -1  -1   27.00    3.20
  17  -1   1   15.20    6.30
  17  -1   1   39.00    9.50
  17  -1   1   11.30   12.90
  17  -1   1   34.00    5.70
 -17  -1  -1   22.70    3.80
 -17  -1  -1   20.70    8.10
  17   1   1   22.30    3.60
 -17   1  -1   37.80    7.70
  17   1   1   25.80    6.90
  17   1   1   23.20    4.80
 -17   1  -1   20.80   11.90
  17   1   1   19.40    3.70
  17   1   1   27.90    8.10
  17   1   1   44.60   11.90
 -17   1  -1   26.30    4.00
 -17   1  -1   27.70    5.50
 -17   1  -1   25.50   10.70
  17   1   1    4.80   17.60
  17   1   1   72.19   39.90
 -17   1  -1   15.50    6.00
  19  -1   1   14.20    4.90
 -19  -1  -1    4.50    3.30
 -19  -1  -1   10.70    6.30
 -19  -1  -1    8.20    6.30
 -19   1  -1    5.00    7.50
  19   1   1  138.49   62.39
  19   1   1   -3.10   12.70
 -19   1  -1    1.70    8.90
 -19   1  -1   27.40    8.10
  19   1   1   13.00    9.00
 -21  -1  -1    1.60    2.20
  21  -1   1   11.40   11.50
  21  -1   1    2.00    1.30
  21  -1   1    1.50    8.00
 -21  -1  -1   -4.10    7.00
  21  -1   1    3.60    2.70
 -21  -1  -1    2.10    1.50
  21  -1   1   -1.10    2.70
 -21  -1  -1   -0.20    3.10
 -21   1  -1    4.20    2.20
 -21   1  -1   -0.60    3.00
 -21   1  -1   14.30   14.10
 -21   1  -1    6.20    4.00
  21   1   1    8.60    4.40
  21   1   1    2.20   15.00
  21   1   1  124.19   84.99
  21   1   1    2.40    1.70
 -21   1  -1    0.80    2.30
  21   1   1    1.10    3.20
  23  -1   1   -0.70    3.90
 -23  -1  -1   11.80    4.50
  23  -1   1    7.90    2.70
 -23  -1  -1    3.00    2.70
  23  -1   1    3.60    3.10
 -23  -1  -1    9.50    3.10
  23  -1   1    5.00    3.80
  23  -1   1    6.50   12.40
  23  -1   1    3.60    2.00
  23   1   1   10.20    3.40
 -23   1  -1   -0.80    2.40
 -23   1  -1    5.00    2.10
 -23   1  -1    4.40    3.90
 -23   1  -1    4.60    4.50
 -23   1  -1   11.50   21.90
  23   1   1   -0.10    3.60
  23   1   1    7.10    3.50
  23   1   1   10.10    4.00
  25  -1   1   -0.20    2.60
 -25  -1  -1    3.30    2.50
  25  -1   1    1.00    1.70
 -25  -1  -1   -0.10    2.20
 -25  -1  -1   -0.60    3.10
  25  -1   1    2.20    1.30
  25  -1   1    2.60    2.60
  25   1   1    0.80    2.90
 -25   1  -1    3.10    3.60
 -25   1  -1    2.90    3.50
  25   1   1   14.70    6.00
  25   1   1    0.30    2.80
 -25   1  -1    2.10    1.70
  25   1   1    3.40    2.60
 -25   1  -1   -2.70    3.50
 -27  -1  -1   21.20    4.40
  27  -1   1   22.10    4.60
  27  -1   1   23.40    3.10
 -27  -1  -1   23.60    6.70
 -27  -1  -1   23.30    5.10
  27  -1   1   17.30    7.10
  27  -1   1   20.90    4.50
 -27   1  -1   20.20    5.00
 -27   1  -1   28.50    6.10
  27   1   1   23.30    6.40
 -27   1  -1   20.90    6.70
  27   1   1   19.70    5.00
  29  -1   1    1.30    1.70
  29  -1   1    0.60    1.30
  29  -1   1    2.60    3.00
 -29  -1  -1   -2.10    2.90
  29  -1   1    2.40    1.80
 -29  -1  -1    0.70    2.70
 -29  -1  -1    1.80    2.00
  29   1   1   -1.40    1.60
 -29   1  -1    0.80    1.80
 -29   1  -1    3.70    2.50
  29   1   1    1.40    2.40
 -29   1  -1    2.20    2.60
  30  -2  -1    1.30    1.40
 -30  -2   1    3.80    2.10
  30  -2  -1    1.80    0.90
  30   2  -1    0.50    1.90
 -30   2   1    1.90    2.30
 -30   2   1    0.80    2.10
 -30   2   1    6.10    3.20
  30   2  -1    3.50    2.80
 -28  -2   1   38.90    5.10
  28  -2  -1   35.10    4.20
  28  -2  -1   28.10    6.20
  28  -2  -1   34.20    3.50
 -28  -2   1   31.40    5.20
  28   2  -1   30.40    5.10
 -28   2   1   39.00    7.40
 -28   2   1   32.70    5.50
  28   2  -1   24.50    6.30
 -28   2   1   43.50    6.50
 -28   2   1   35.90    6.30
  26  -2  -1   18.10    7.00
 -26  -2   1   15.30    3.70
  26  -2  -1   20.60    4.60
  26  -2  -1   21.70    5.70
  26  -2  -1   19.20    3.20
  26  -2  -1   19.30    3.80
 -26  -2   1   26.20    8.40
 -26  -2   1   26.80    4.60
 -26   2   1   22.80    6.30
  26   2  -1   14.40    5.10
 -26   2   1   21.00    3.30
 -26   2   1    9.90    5.10
  26   2  -1   23.90    7.00
 -26   2   1   22.10    5.80
 -26   2   1   22.40    5.00
 -24  -2   1   37.20    3.90
  24  -2  -1   40.20    4.80
 -24  -2   1   34.20    5.60
  24  -2  -1   40.10    4.30
 -24  -2   1   17.80    6.90
  24  -2  -1   32.60    6.80
  24  -2  -1   26.70    6.00
 -24   2   1   31.40    7.60
 -24   2   1   38.00    4.60
  24   2  -1   41.10    6.80
  24   2  -1   26.00    9.00
 -24   2   1   28.20    7.70
 -24   2   1   26.60   10.00
 -24   2   1   26.60    6.30
 -22  -2   1   -0.10    1.60
 -22  -2   1    2.00    1.50
 -22  -2   1    1.70    4.00
 -22  -2   1    3.60    2.20
  22  -2  -1    2.40   10.10
 -22  -2   1   -3.10    3.10
  22  -2  -1    2.20    2.60
  22  -2  -1  -17.90   22.90
  22  -2  -1   -1.10    2.60
 -22   2   1    0.60    3.40
 -22   2   1   11.80   24.00
 -22   2   1   -0.40    2.80
 -22   2   1   -0.20    3.20
  22   2  -1    2.10    3.50
  22   2  -1    0.50    4.00
  22   2  -1    6.60    4.10
  22   2  -1  -25.40   57.19
 -22   2   1    0.80    4.30
 -22   2   1    2.80    2.00
  20  -2  -1    4.70    7.60
  20  -2  -1    4.90    2.70
  20  -2  -1   -5.00    7.80
 -20  -2   1   -1.50    2.80
 -20  -2   1    3.70    1.70
  20  -2  -1   10.20    3.30
  20  -2  -1   14.00    4.80
 -20  -2   1    7.80    7.40
 -20  -2   1    3.90    2.10
 -20  -2   1    4.60    2.50
  20   2  -1    1.40    3.50
  20   2  -1    4.00    1.50
  20   2  -1    2.70    3.10
  20   2  -1    4.40    4.00
 -20   2   1   10.40    5.20
 -20   2   1    7.30    3.70
 -20   2   1    2.70    5.70
  20   2  -1   -0.90    4.10
 -20   2   1   -3.30   13.90
 -20   2   1    3.90    3.20
 -20   2   1   11.30    3.10
  20   2  -1  -29.90   36.20
  20   2  -1   28.60   18.30
 -18  -2   1   58.29    6.90
  18  -2  -1   24.80   10.80
  18  -2  -1   48.50    5.00
  18  -2  -1   49.80    6.60
  18  -2  -1   54.79   13.60
 -18  -2   1   44.10    4.70
 -18  -2   1   49.70    4.40
  18  -2  -1   58.79    7.00
 -18  -2   1   63.59    7.40
  18  -2  -1   56.29    4.80
 -18  -2   1   52.69    5.20
  18   2  -1   51.49    7.70
  18   2  -1   38.00   22.60
 -18   2   1   51.29    8.90
 -18   2   1   79.09   20.70
  18   2  -1   65.19   26.50
  18   2  -1   44.10   10.30
  18   2  -1   58.39    4.70
 -18   2   1   53.89    5.60
 -18   2   1   51.29    5.00
 -18   2   1   38.60    7.60
  18   2  -1   38.30    7.40
 -18   2   1   31.60    8.60
  18   2  -1   44.30    8.30
 -16  -2   1   17.00    4.20
 -16  -2   1   31.90    4.80
 -16  -2   1   35.10    7.80
  16  -2  -1   20.50    3.30
  16  -2  -1   28.00    7.20
 -16  -2   1   27.90    3.50
  16  -2  -1   19.40    8.00
  16  -2  -1   26.30    3.40
  16  -2  -1   34.30    5.00
 -16   2   1   10.80    9.50
 -16   2   1   30.30    4.40
 -16   2   1   35.70    3.70
  16   2  -1   27.20   22.40
  16   2  -1   18.30    5.70
  16   2  -1   31.30    3.30
  16   2  -1   25.90    3.40
 -16   2   1   43.30    7.80
 -16   2   1   27.40    7.30
  16   2  -1   22.20    7.10
  16   2  -1   18.40   14.00
 -16   2   1   23.70    9.60
 -16   2   1   19.60    6.80
  16   2  -1   44.90    9.60
  16   2  -1   33.40    7.80
  14  -2  -1  127.29    9.70
 -14  -2   1  130.59    8.70
 -14  -2   1  130.29   16.50
  14  -2  -1  129.69   24.30
 -14  -2   1  137.69   13.10
  14  -2  -1  140.79   12.20
  14  -2  -1  124.29    8.60
 -14  -2   1  131.89   10.20
  14  -2  -1  139.39   18.30
  14  -2  -1  127.89   15.40
  14   2  -1  122.79    8.40
 -14   2   1  138.49    9.00
 -14   2   1  125.39   13.40
 -14   2   1  131.19   22.10
  14   2  -1  148.19   18.40
  14   2  -1  134.19   34.60
  14   2  -1  117.89   23.20
  14   2  -1  148.59   13.50
  14   2  -1  105.49   22.70
  14   2  -1  149.09   15.60
 -14   2   1  166.38   15.40
  12  -2  -1   35.50    3.60
 -12  -2   1   46.50    5.10
 -12  -2   1   46.50    6.80
 -12  -2   1   44.90    4.20
 -12  -2   1   45.10    8.40
  12  -2  -1   47.40    4.50
  12  -2  -1   48.40    8.60
  12  -2  -1   47.20    6.50
  12  -2  -1   24.80    9.90
  12   2  -1   46.60   14.70
  12   2  -1   49.80    8.90
  12   2  -1   47.90   15.50
  12   2  -1   60.29   11.50
  12   2  -1   27.90   15.80
 -12   2   1   -2.40   32.30
 -10  -2   1  150.78   12.00
  10  -2  -1  144.09   13.60
  10  -2  -1  141.49   10.70
 -10  -2   1  116.59    8.20
 -10  -2   1  136.09    9.60
  10  -2  -1  127.29    8.50
 -10  -2   1  130.49   12.20
  10   2  -1  140.49   15.30
  10   2  -1  115.79   18.80
 -10   2   1  111.09   17.80
  10   2  -1  148.39   25.40
  10   2  -1  131.39   19.10
 -10   2   1  153.68   33.40
  10   2  -1  126.39   11.60
  -8  -2   1  220.78   14.20
   8  -2  -1  232.68   15.90
  -8  -2   1  260.27   17.60
   8  -2  -1  275.47   19.90
  -8  -2   1  225.68   18.70
  -8  -2   1  232.98   16.40
  -8   2   1  249.38   25.70
  -8   2   1  259.47   24.40
  -8   2   1  245.28   24.80
   8   2  -1  250.07   24.50
   8   2  -1  249.58   25.40
  -6  -2   1  135.79   11.80
   6  -2  -1  129.19   10.50
  -6  -2   1  144.49   10.20
  -6  -2   1  122.39    8.70
   6  -2  -1  142.79   13.20
  -6  -2   1  131.99   12.50
  -6   2   1  147.99   14.30
   6   2  -1  143.39   17.00
   6   2  -1  132.39   19.00
  -6   2   1  146.99   18.30
   6   2  -1  141.09   16.60
  -6   2   1  149.09   17.40
  -6   2   1  149.59   17.40
   4  -2  -1  322.07   22.40
  -4  -2   1  283.17   20.90
  -4  -2   1  285.67   18.30
   4  -2  -1  302.57   17.30
  -4  -2   1  286.37   19.70
   4   2  -1  290.87   25.20
  -4   2   1  283.07   24.50
  -4   2   1  340.47   30.00
   4   2  -1  299.17   25.60
   4   2  -1  239.08   27.80
  -4   2   1  282.27   24.30
  -2  -2   1   90.59    6.70
   2  -2  -1   75.69   10.00
  -2  -2   1   75.09    8.10
  -2  -2   1   83.39    7.90
  -2   2   1   74.79   10.70
   2   2  -1   70.49   10.30
  -2   2   1   87.79   11.80
   2   2  -1  102.49   13.40
   2   2  -1   93.79   12.80
   2   2  -1   88.59    9.70
  -2   2   1   93.09   13.90
   0  -2  -1   32.00    4.00
   0  -2   1   37.60    5.30
   0   2   1   31.00    7.30
   0   2  -1   25.20    7.00
   0   2   1   24.60    7.00
   0   2  -1   28.90    7.60
   0   2  -1   21.60    8.30
   0   2   1   28.70    9.00
  -2  -2  -1  123.19    9.40
   2  -2   1  144.79   13.50
   2  -2   1  133.99   11.60
  -2  -2  -1  127.59    9.10
  -2  -2  -1  118.59    8.20
   2   2   1  141.49   15.40
   2   2   1  124.69   13.00
  -2   2  -1  130.79   14.70
   2   2   1  147.99   16.90
  -2   2  -1  140.29   16.00
   2   2   1  120.89   13.70
  -2   2  -1  150.38   15.60
   4  -2   1  228.38   20.00
   4  -2   1  214.88   15.70
   4  -2   1  207.98   13.70
  -4  -2  -1  219.68   14.10
  -4  -2  -1  206.98   12.30
   4   2   1  245.48   23.00
   4   2   1  226.98   21.60
  -4   2  -1  202.98   21.20
   4   2   1  232.08   22.30
  -4   2  -1  204.98   21.20
  -4   2  -1  220.18   19.20
  -4   2  -1  192.68   15.50
   6  -2   1   45.20    6.10
  -6  -2  -1   42.50    5.10
   6  -2   1   44.80    9.60
  -6  -2  -1   51.09    9.60
   6  -2   1   46.30    4.60
  -6  -2  -1   34.30    3.80
   6   2   1   39.70   10.20
  -6   2  -1   53.69   11.00
   6   2   1   34.10    5.40
  -6   2  -1   51.09    8.30
   6   2   1   33.70   10.30
  -6   2  -1   47.80    9.90
  -6   2  -1   46.50    9.60
  -6   2  -1   48.50   12.50
   6   2   1   37.00   14.50
  -8  -2  -1    3.60    2.10
  -8   2  -1    0.80    3.80
   8   2   1   -0.40   11.20
  -8   2  -1   -8.30    9.90
  -8   2  -1   16.40    7.10
  10  -2   1   24.10    6.30
 -10  -2  -1   23.80    4.70
  10  -2   1   31.60    4.70
  10   2   1    6.70   12.90
  10   2   1   21.60    6.50
  10   2   1   39.70   12.00
  12  -2   1   41.70    9.70
  12  -2   1   43.00    4.70
  12  -2   1   53.79    6.50
 -12  -2  -1   40.10    5.00
 -12  -2  -1   44.30    6.80
  12  -2   1   49.70    8.80
 -12  -2  -1   48.60    9.90
  12  -2   1   50.89   13.30
 -12  -2  -1   44.00    3.80
  12   2   1   34.40   13.00
  12   2   1   27.10   12.30
 -12   2  -1   38.00   14.10
 -12   2  -1    7.60   33.70
  12   2   1   31.80   17.40
  14  -2   1   93.59   20.90
  14  -2   1  113.89   11.60
  14  -2   1  121.59   15.30
  14  -2   1  110.59    7.40
 -14  -2  -1   95.59    8.00
 -14  -2  -1   90.29    6.90
 -14  -2  -1  108.59    7.40
 -14  -2  -1  125.79    9.20
 -14  -2  -1  104.79   14.90
 -14  -2  -1  102.99   12.00
  14  -2   1  104.59   15.70
  14  -2   1  115.89    8.90
 -14   2  -1   99.69    8.10
  14   2   1  105.99   13.50
 -14   2  -1   84.49   20.00
  14   2   1  124.99   21.60
  14   2   1  105.59   34.70
 -14   2  -1   77.19   10.90
  14   2   1   96.69   10.90
  14   2   1  120.89   15.60
 -14   2  -1   90.09   11.60
  14   2   1  108.69    7.10
  16  -2   1   14.60   10.90
  16  -2   1   26.80    9.20
  16  -2   1   28.50    3.60
 -16  -2  -1   26.70    3.30
  16  -2   1   27.60    5.60
 -16  -2  -1   25.10    4.00
  16  -2   1   43.90    9.60
 -16  -2  -1   31.60    3.60
 -16  -2  -1   27.80    4.70
  16  -2   1   23.30    4.10
 -16  -2  -1   22.00    8.50
  16  -2   1   23.30    4.90
 -16   2  -1   19.10    4.10
  16   2   1   18.50    5.50
  16   2   1   35.90    7.60
  16   2   1   25.80    3.30
 -16   2  -1   13.70    8.60
  16   2   1   24.20    8.40
 -16   2  -1   20.10    7.60
  16   2   1  -16.00   25.70
  16   2   1   29.80   13.80
 -16   2  -1   27.00    7.80
  16   2   1    9.30    9.70
 -16   2  -1   28.60    3.70
 -16   2  -1   29.60    7.20
  16   2   1   24.50    7.30
 -18  -2  -1   33.40    3.70
 -18  -2  -1   29.70    4.10
  18  -2   1   39.50    5.80
 -18  -2  -1   28.80    4.70
  18  -2   1   25.20    5.80
 -18  -2  -1   40.80    7.20
 -18  -2  -1   34.50    5.50
  18  -2   1   32.20   13.30
  18  -2   1   14.70    7.70
  18  -2   1   30.40    4.20
 -18  -2  -1   18.40    7.80
  18  -2   1   28.30    3.80
 -18   2  -1   15.60   13.40
  18   2   1   24.70    9.40
 -18   2  -1   31.30    7.20
  18   2   1   25.10    6.30
 -18   2  -1   34.60    4.40
 -18   2  -1   24.50    9.60
 -18   2  -1   39.80    8.50
  18   2   1   28.30    3.70
 -18   2  -1   27.40    7.80
  18   2   1   28.00   16.40
 -18   2  -1   28.10    4.00
  18   2   1   44.70    7.90
  18   2   1  -35.30   34.80
 -20  -2  -1   42.80   13.80
 -20  -2  -1   43.00    5.80
  20  -2   1   42.80    4.70
 -20  -2  -1   46.00    4.80
  20  -2   1   32.80   13.60
  20  -2   1   91.79   20.30
 -20  -2  -1   36.30    6.60
 -20  -2  -1   33.80    8.20
 -20  -2  -1   26.00   10.90
  20  -2   1   52.19    6.20
  20  -2   1   45.10    7.60
  20  -2   1   52.39    7.20
 -20   2  -1   49.99    9.40
 -20   2  -1   31.20   16.20
  20   2   1   55.09   11.30
  20   2   1   41.80    7.30
  20   2   1   56.49   37.20
 -20   2  -1   42.90    4.90
 -20   2  -1   48.40    7.90
 -20   2  -1   41.70   11.10
  20   2   1   52.59    8.70
 -20   2  -1   45.60    8.40
 -20   2  -1   43.50    4.90
  22  -2   1   10.00    3.10
  22  -2   1   10.90    2.90
 -22  -2  -1   18.50   13.40
 -22  -2  -1   10.60    2.80
  22  -2   1   23.20   11.30
 -22  -2  -1   12.40    4.60
 -22  -2  -1    1.10    4.00
 -22  -2  -1    2.80    3.80
  22  -2   1    6.50    4.20
  22  -2   1    2.70    3.80
 -22  -2  -1   12.20    3.50
 -22   2  -1    6.80    5.10
 -22   2  -1  -16.20   18.90
 -22   2  -1   10.10    3.20
 -22   2  -1    9.80    4.10
 -22   2  -1    6.10    4.50
  22   2   1   13.30    4.70
 -22   2  -1    6.10    4.80
 -22   2  -1    5.80    2.60
  22   2   1    9.10    4.80
  22   2   1    9.60    6.40
 -24  -2  -1   33.10    5.60
 -24  -2  -1   32.10    8.20
  24  -2   1   33.50    7.90
  24  -2   1   34.20    4.70
 -24  -2  -1   31.40    3.50
 -24  -2  -1   33.90    5.00
  24  -2   1   41.20    4.70
  24  -2   1   37.30    7.20
 -24   2  -1   39.50    7.70
  24   2   1   30.60    9.10
 -24   2  -1   35.40    4.40
  24   2   1   22.50    6.20
 -24   2  -1   40.90    8.70
  24   2   1   28.70    6.90
 -24   2  -1   38.20   10.00
 -24   2  -1   30.10    6.40
 -26  -2  -1    3.70    2.40
  26  -2   1    0.50    1.60
  26  -2   1   -0.30    3.70
 -26  -2  -1    2.10    1.90
  26  -2   1    2.50    1.50
  26  -2   1    1.50    1.80
  26  -2   1   -1.30    2.80
 -26   2  -1    3.70    2.90
 -26   2  -1   -0.70    2.80
  26   2   1   11.90    4.70
 -26   2  -1    4.20    3.20
 -26   2  -1    2.00    1.60
  26   2   1    1.20    2.70
  26   2   1    0.40    2.30
 -26   2  -1   -4.20    3.70
 -28  -2  -1    4.80    2.10
  28  -2   1    7.30    3.00
 -28  -2  -1    8.30    2.70
 -28   2  -1    6.10    3.80
 -28   2  -1    6.50    3.00
  28   2   1    4.50    2.80
 -28   2  -1   10.80    3.90
 -28   2  -1    2.80    3.10
  28   2   1    5.70    3.30
 -30  -2  -1    1.70    2.00
  30  -2   1    7.30    2.40
  30  -2   1    3.80    1.90
 -30   2  -1    6.40    2.20
 -30   2  -1    1.40    2.10
  30   2   1    5.30    2.30
  29  -3  -1    7.90    1.70
 -29  -3   1    6.00    1.80
 -29   3   1    3.90    1.80
 -29   3   1    7.40    2.40
  29   3  -1    6.10    2.60
 -29   3   1    5.00    2.60
  29   3  -1    1.80    2.30
 -27  -3   1   18.80    3.80
 -27  -3   1   15.70    3.00
  27  -3  -1   18.10    2.50
  27  -3  -1   18.80    3.60
  27  -3  -1   12.80    3.40
  27   3  -1   13.60    5.00
 -27   3   1    9.90    3.40
 -27   3   1   11.50    4.40
  27   3  -1   12.60    4.50
 -27   3   1    9.60    4.40
 -27   3   1   13.90    2.70
  27   3  -1   12.50    4.50
 -25  -3   1   60.19    4.70
  25  -3  -1   58.29    5.60
  25  -3  -1   62.89    5.20
 -25  -3   1   54.59    6.10
 -25  -3   1   45.80    6.50
  25  -3  -1   41.30    7.70
  25  -3  -1   59.89    8.20
 -25   3   1   61.19    5.30
  25   3  -1   58.59   10.40
  25   3  -1   55.99    8.70
 -25   3   1   66.69    9.10
 -25   3   1   57.59    8.80
 -25   3   1   52.79    7.70
 -25   3   1   41.20    9.60
  25   3  -1   61.49    7.50
  23  -3  -1    4.30    2.80
 -23  -3   1    1.00    1.80
  23  -3  -1    2.30    1.90
 -23  -3   1    4.90    2.30
 -23  -3   1    0.20    1.50
 -23  -3   1    5.40    3.80
  23  -3  -1    3.00    1.60
  23  -3  -1   -1.60    2.70
  23   3  -1    2.80    3.70
  23   3  -1    2.80    4.10
 -23   3   1    1.40    1.50
 -23   3   1    1.60    3.70
 -23   3   1    1.20    1.40
 -23   3   1    2.90    4.60
 -23   3   1    3.30    3.30
 -23   3   1    4.80    2.90
 -23   3   1   -4.90    3.50
  23   3  -1    1.90    3.50
  21  -3  -1   97.99   23.00
 -21  -3   1  109.29   10.40
  21  -3  -1  105.09    8.20
  21  -3  -1  100.59    7.80
 -21  -3   1  104.39    7.80
 -21  -3   1   55.69   22.80
 -21  -3   1  101.39    8.10
 -21  -3   1   93.59    8.60
  21  -3  -1  104.19   10.50
  21  -3  -1  102.89   10.60
  21   3  -1   95.39   51.79
 -21   3   1   99.69   11.80
 -21   3   1  100.19   15.70
  21   3  -1  105.79   11.50
 -21   3   1  107.79    8.10
 -21   3   1   80.09   28.80
 -21   3   1   98.09    8.20
 -21   3   1  117.59   12.80
  21   3  -1  106.19    7.80
 -21   3   1   70.59   15.10
  21   3  -1  121.69   16.60
  19  -3  -1   13.60    4.80
 -19  -3   1   14.60    4.80
 -19  -3   1   14.10    9.20
  19  -3  -1   12.30    2.80
 -19  -3   1   11.50    4.00
  19  -3  -1    9.30    3.60
  19  -3  -1   11.70    3.20
  19  -3  -1   25.40   12.80
 -19  -3   1   15.10    3.30
  19  -3  -1    6.00    8.30
 -19  -3   1    7.90    2.80
 -19  -3   1   11.50    3.40
 -19  -3   1    0.80    7.90
  19   3  -1    8.00    4.10
 -19   3   1   -8.70   17.40
  19   3  -1  -22.10   22.00
 -19   3   1   13.60    3.70
 -19   3   1   15.50    8.20
  19   3  -1    8.00    5.00
  19   3  -1    6.00    5.20
 -19   3   1    0.80    5.00
 -19   3   1   13.90    3.20
 -19   3   1    9.80    4.70
  19   3  -1   15.00    6.00
 -19   3   1   12.40    5.60
 -19   3   1    1.00    8.20
  19   3  -1    6.80    2.00
  19   3  -1   69.89   46.70
 -17  -3   1   30.40    3.90
 -17  -3   1   27.70   12.60
  17  -3  -1   21.70   10.40
 -17  -3   1   29.40    5.50
 -17  -3   1   34.20    6.80
 -17  -3   1   26.80    3.50
  17  -3  -1   30.40   10.90
  17  -3  -1   29.90    4.00
 -17  -3   1   53.99   12.90
  17  -3  -1   29.50    5.40
 -17  -3   1   39.30    5.50
  17  -3  -1   25.90    3.90
 -17   3   1   41.80    8.70
 -17   3   1   22.70   13.60
  17   3  -1   38.00    9.00
 -17   3   1   33.40    4.70
  17   3  -1   26.60    7.80
  17   3  -1    4.20   15.50
  17   3  -1   31.20    5.90
 -17   3   1   29.30    4.70
  17   3  -1   35.80    9.90
 -17   3   1   16.40   15.40
 -17   3   1   32.20   10.10
 -17   3   1   46.70   10.20
 -17   3   1   47.00   10.10
  17   3  -1   29.80    3.40
  17   3  -1   19.10    7.30
 -15  -3   1   27.20    3.70
  15  -3  -1   26.80    3.40
  15  -3  -1   18.40    9.30
  15  -3  -1   28.70    4.80
 -15  -3   1   34.20    3.50
 -15  -3   1   29.70    5.20
 -15   3   1   15.30   12.10
 -15   3   1   18.10    4.20
 -15   3   1   14.70    8.10
  15   3  -1   30.10    3.40
  15   3  -1   31.00    3.20
 -15   3   1  -50.59   42.50
  15   3  -1   39.00    7.90
  15   3  -1   20.30    8.00
  15   3  -1   36.40    7.40
 -15   3   1   19.40    7.50
  15   3  -1    2.20   14.60
 -15   3   1   22.80    8.40
 -15   3   1   29.00    3.80
 -15   3   1   19.20   14.90
 -13  -3   1  171.48   21.00
 -13  -3   1  203.28   13.80
  13  -3  -1  163.38   27.10
 -13  -3   1  180.98   11.80
  13  -3  -1  197.38   13.10
  13  -3  -1  196.28   11.90
 -13  -3   1  205.28   17.60
 -13  -3   1  204.88   12.20
 -13   3   1  195.38   23.20
  13   3  -1  208.48   20.70
  13   3  -1  197.08   30.90
 -13   3   1  186.38   17.30
 -13   3   1  241.08   22.30
  13   3  -1  203.78   12.00
  13   3  -1  198.58   16.70
 -13   3   1  192.58   12.20
 -13   3   1  222.98   33.10
  13   3  -1  215.28   67.19
 -13   3   1  196.58   14.50
  13   3  -1  184.28   33.90
 -13   3   1  193.18   30.60
 -11  -3   1   61.49    6.00
  11  -3  -1   38.70    9.60
 -11  -3   1   37.40    9.10
  11  -3  -1   54.49    7.20
  11  -3  -1   54.19    4.90
 -11  -3   1   49.00    8.50
  11  -3  -1   52.09   17.30
 -11   3   1   54.59   16.70
 -11   3   1   54.39   11.20
  11   3  -1   53.09   21.30
  11   3  -1   59.39    9.70
 -11   3   1   63.89    5.90
 -11   3   1   65.79   13.50
  11   3  -1   43.80    4.40
  11   3  -1   27.90   18.50
 -11   3   1   75.59   14.30
 -11   3   1   75.99    8.20
  11   3  -1   58.69   20.50
 -11   3   1   60.49    7.10
  11   3  -1   72.69    8.90
   9  -3  -1   48.80    6.20
   9  -3  -1   35.00    8.10
   9  -3  -1   33.40    3.50
  -9  -3   1   37.20    6.70
   9  -3  -1   62.99   15.50
  -9  -3   1   35.70    4.40
   9   3  -1   55.89   15.50
   9   3  -1   40.80   17.20
   9   3  -1   51.29   18.30
  -9   3   1   40.40   13.50
  -9   3   1   49.00   14.40
   7  -3  -1  131.79   14.80
  -7  -3   1  119.79   11.70
  -7  -3   1  124.19   10.10
   7  -3  -1  133.79   11.40
   7  -3  -1   89.79   23.80
  -7   3   1  142.59   20.50
   7   3  -1  127.79   22.00
   7   3  -1  138.89   21.60
   7   3  -1  121.79   20.40
  -7   3   1  123.39   15.30
  -7   3   1  139.39   21.20
  -5  -3   1   63.89    8.30
  -5  -3   1   64.89   11.20
   5  -3  -1   81.29    8.80
   5  -3  -1   56.79   13.70
   5  -3  -1   70.99   14.20
  -5  -3   1   75.99    5.40
  -5  -3   1   61.59    6.60
   5  -3  -1   66.59    6.40
  -5   3   1   70.99   13.80
   5   3  -1   61.19   15.50
  -5   3   1   70.39   14.50
  -5   3   1   67.49   11.80
   5   3  -1   66.69   13.10
   3  -3  -1  511.45   30.80
   3  -3  -1  473.85   37.20
  -3  -3   1  448.06   31.20
  -3  -3   1  483.85   30.30
   3  -3  -1  529.25   37.20
  -3   3   1  531.75   40.30
   3   3  -1  492.55   40.70
   3   3  -1  491.55   41.90
  -3   3   1  505.25   38.40
   3   3  -1  488.85   37.30
  -1  -3   1  140.69   12.60
  -1  -3   1  129.59   12.70
   1  -3  -1  127.19   11.10
  -1  -3   1  117.89   11.40
   1  -3  -1  124.79   14.80
   1  -3  -1  165.28   18.10
   1   3  -1  155.38   19.10
   1   3  -1  132.39   17.20
   1   3  -1  140.89   19.90
  -1   3   1  143.59   17.50
  -1   3   1  140.09   17.80
  -1   3   1  168.28   21.80
   1  -3   1  138.89   14.60
   1  -3   1  156.08   15.60
  -1  -3  -1  149.99   13.30
  -1  -3  -1  150.08   11.80
  -1  -3  -1  147.69   10.90
  -1   3  -1  147.89   20.50
   1   3   1  146.69   17.30
  -1   3  -1  145.29   18.30
   1   3   1  146.59   19.30
   1   3   1  172.78   22.80
  -1   3  -1  161.08   20.00
   3  -3   1  116.19   15.30
  -3  -3  -1  148.59   11.30
   3  -3   1  166.38   15.10
  -3   3  -1  127.29   17.90
   3   3   1  143.99   16.30
   5  -3   1   72.69    6.90
   5  -3   1   65.19   12.70
  -5  -3  -1   64.59    6.90
  -5  -3  -1   54.69    4.80
   5  -3   1   54.39    8.70
  -5   3  -1   70.89   12.00
  -5   3  -1   66.19   14.30
   5   3   1   69.69   14.90
  -5   3  -1   69.99   15.40
   5   3   1   91.59   17.60
   7  -3   1   47.40    7.50
  -7  -3  -1   31.90    5.60
   7  -3   1   41.20   12.50
  -7   3  -1   48.90   13.60
   7   3   1   43.10   13.50
  -7   3  -1   28.20   12.60
   7   3   1   44.00   15.10
  -7   3  -1   39.20   10.40
   7   3   1   37.80   14.60
   9  -3   1    2.10    3.60
  -9  -3  -1    5.60    2.60
   9  -3   1    9.40    2.40
   9  -3   1    6.30    2.70
   9  -3   1    5.10    5.00
  -9  -3  -1   10.90    2.70
   9  -3   1    3.30    4.00
   9   3   1    9.50    7.70
   9   3   1    4.90    7.90
  -9   3  -1   -2.40    6.30
  -9   3  -1    4.70    6.80
   9   3   1   -5.90   11.00
  11  -3   1   97.69    9.50
 -11  -3  -1   99.29    7.90
 -11  -3  -1   94.19   10.10
  11  -3   1   96.99    7.10
  11  -3   1   97.69   15.50
 -11  -3  -1   69.49   13.20
 -11  -3  -1   90.19    6.50
  11  -3   1   61.49   18.90
  11  -3   1   77.99   13.00
  11   3   1   80.09   10.90
 -11   3  -1   97.29    8.50
  11   3   1   85.59    6.20
 -11   3  -1   81.09   18.90
  11   3   1  114.39   29.50
  11   3   1   79.49    9.80
  11   3   1   80.29   12.20
 -11   3  -1   80.99   27.10
 -11   3  -1   85.89   12.90
  11   3   1   84.19   20.50
  11   3   1  119.29   26.00
 -11   3  -1   79.79   10.00
 -11   3  -1   68.99   10.50
 -13  -3  -1  208.78   14.00
  13  -3   1  207.28   12.00
 -13  -3  -1  208.48   22.60
 -13  -3  -1  215.98   12.30
  13  -3   1  219.48   21.50
  13  -3   1  197.68   16.20
  13  -3   1  193.58   23.50
 -13  -3  -1  214.48   18.10
  13  -3   1  214.98   13.70
 -13   3  -1  173.68   16.80
  13   3   1  140.19   33.30
 -13   3  -1  216.18   17.80
 -13   3  -1  134.69   43.10
 -13   3  -1  192.98   13.90
  13   3   1  186.88   18.10
 -13   3  -1  198.78   21.50
  13   3   1  153.18   19.50
  13   3   1  211.08   11.90
  13   3   1  175.48   17.30
  13   3   1  214.08   12.00
  13   3   1  188.38   16.20
  13   3   1  170.18   29.20
 -13   3  -1  164.48   33.40
 -13   3  -1  182.98   16.70
 -13   3  -1  178.88   31.00
  13   3   1  133.19   39.90
 -13   3  -1  171.28   11.80
 -15  -3  -1   71.99    6.00
 -15  -3  -1   48.60   16.10
  15  -3   1   73.39    5.90
 -15  -3  -1   72.69   12.50
 -15  -3  -1   72.99    7.50
 -15  -3  -1   77.09    6.10
  15  -3   1   68.49   13.00
  15  -3   1   72.29    7.50
  15  -3   1   83.49   16.60
 -15  -3  -1   68.19    5.70
  15   3   1   90.39   11.10
 -15   3  -1   47.90   16.60
  15   3   1   89.29   10.00
  15   3   1   50.39   22.60
  15   3   1   75.29    5.70
 -15   3  -1   74.49    5.90
 -15   3  -1   67.89    9.90
 -15   3  -1   56.49   10.30
 -15   3  -1   78.89    7.10
 -15   3  -1   68.29   12.80
  15   3   1   99.59   34.20
 -15   3  -1   75.39   10.60
  15   3   1   44.60   31.00
 -17  -3  -1   13.00    3.50
 -17  -3  -1    6.20    7.40
 -17  -3  -1   16.40    3.10
  17  -3   1    9.30    3.20
  17  -3   1   16.60    3.30
 -17  -3  -1    5.90    6.10
  17  -3   1   15.40    4.40
 -17  -3  -1   18.90    3.40
  17  -3   1   23.70    3.80
  17  -3   1   34.40   12.10
 -17   3  -1   11.90    2.90
 -17   3  -1   18.00    4.00
  17   3   1   -1.00   16.40
 -17   3  -1    9.40    4.70
  17   3   1   19.10    6.50
 -17   3  -1   16.50   11.70
  17   3   1   13.40    2.80
  17   3   1   25.00    7.70
  17   3   1    9.90    6.80
 -17   3  -1   17.40    8.20
  17   3   1   24.50   29.10
  17   3   1   58.59   34.10
 -17   3  -1   -5.50   13.60
 -17   3  -1   30.70    7.30
 -19  -3  -1   -3.80    7.10
 -19  -3  -1    5.60    3.00
  19  -3   1   22.70   10.10
 -19  -3  -1  -10.40    8.00
  19  -3   1   12.70    4.70
 -19  -3  -1   13.70    3.20
  19  -3   1    7.80    3.30
 -19   3  -1   15.20    5.40
  19   3   1  -16.90   38.20
 -19   3  -1    6.00    4.20
  19   3   1   15.50    6.10
 -19   3  -1    6.80    6.60
  19   3   1   16.80    7.30
  19   3   1    6.30    4.30
 -19   3  -1    3.90    4.40
 -19   3  -1   13.20    3.20
 -19   3  -1   -9.00   18.40
 -19   3  -1   14.10    5.30
  21  -3   1  119.49   11.60
  21  -3   1  126.29    9.90
 -21  -3  -1  115.99   10.90
  21  -3   1  124.59    9.60
 -21  -3  -1  118.19    8.70
 -21  -3  -1  109.59    8.90
 -21  -3  -1  122.29   10.60
  21   3   1   13.30   52.69
 -21   3  -1  121.49   14.00
  21   3   1   98.69   15.30
  21   3   1  110.69    8.60
 -21   3  -1  116.19   12.40
 -21   3  -1  116.79    9.20
 -21   3  -1  109.09   17.20
 -21   3  -1  139.09   10.30
  21   3   1  128.39   14.40
 -21   3  -1  138.59   14.00
  23  -3   1    4.50    5.70
 -23  -3  -1    3.00    5.60
 -23  -3  -1   -0.20    1.40
 -23  -3  -1   27.30   12.50
  23  -3   1   -5.50    4.80
  23  -3   1    1.80    1.50
 -23  -3  -1    0.80    1.70
 -23  -3  -1   -1.20    1.90
  23  -3   1    2.30    1.60
  23   3   1    0.70    4.20
 -23   3  -1    0.70    3.20
 -23   3  -1    0.00    4.20
  23   3   1    0.90    3.20
 -23   3  -1    6.90    3.60
 -23   3  -1    4.80    3.00
  23   3   1    7.10    3.70
 -23   3  -1    2.40    1.80
 -23   3  -1    2.30    6.20
 -23   3  -1    6.00    3.60
  25  -3   1   15.50    6.30
  25  -3   1   37.40    4.00
 -25  -3  -1   26.00    4.20
  25  -3   1   25.10    4.60
 -25  -3  -1   35.20    4.40
  25  -3   1   32.80    4.30
 -25  -3  -1   23.20    4.60
  25   3   1   25.20    7.20
 -25   3  -1   26.40    5.80
 -25   3  -1   37.00    3.90
 -25   3  -1   16.20    5.80
 -25   3  -1   27.10    6.30
 -25   3  -1   15.70    6.70
  25   3   1   37.50    7.20
  27  -3   1    6.10    2.50
 -27  -3  -1   12.20    3.50
  27  -3   1    7.10    2.70
 -27  -3  -1    5.10    2.10
 -27   3  -1    5.10    4.80
 -27   3  -1   12.70    3.80
  27   3   1    9.80    4.20
  27   3   1    3.10    2.70
 -27   3  -1    5.60    3.40
 -27   3  -1    5.90    2.00
  27   3   1    1.40    2.70
 -27   3  -1    5.00    2.70
  27   3   1    8.50    3.70
  26  -4  -1    5.70    1.80
 -26  -4   1    7.40    2.40
  26  -4  -1    7.60    2.30
  26  -4  -1    1.20    1.70
 -26  -4   1    3.10    1.50
 -26  -4   1    5.00    2.60
 -26   4   1    5.30    2.90
 -26   4   1    4.60    1.50
  26   4  -1    3.70    2.10
  26   4  -1    4.50    2.30
  26   4  -1    3.30    3.40
 -26   4   1    9.60    3.70
  26   4  -1    3.00    2.80
 -24  -4   1   22.50    4.40
 -24  -4   1   19.70    7.40
 -24  -4   1   13.90    3.80
  24  -4  -1   16.50    3.30
  24  -4  -1   20.20    5.80
  24  -4  -1   26.80    3.10
 -24  -4   1   15.60    3.50
  24   4  -1   31.10    7.50
  24   4  -1   21.10    6.70
 -24   4   1   25.70    5.60
 -24   4   1   21.30    5.60
 -24   4   1   18.80    2.80
 -24   4   1   21.60    3.50
 -22  -4   1    8.00    2.60
  22  -4  -1    7.70    3.20
  22  -4  -1    8.00    2.50
 -22  -4   1    3.40    1.70
 -22  -4   1    3.60    1.90
  22  -4  -1   10.60    3.40
 -22  -4   1    8.00    4.60
 -22   4   1    7.40    2.60
 -22   4   1    4.10    3.60
 -22   4   1    3.60    3.60
 -22   4   1    3.50    3.50
 -22   4   1    2.70    3.90
  22   4  -1    1.30    3.30
  22   4  -1    4.20    1.80
  22   4  -1    4.20    4.00
  22   4  -1    7.10    5.60
 -22   4   1    6.80    2.30
  20  -4  -1   14.40    3.10
 -20  -4   1    5.00    2.20
  20  -4  -1    6.60    3.50
  20  -4  -1    9.60    2.60
 -20  -4   1   12.30    4.20
  20  -4  -1    2.70    2.80
 -20  -4   1   11.40    3.00
 -20   4   1    7.80    2.90
 -20   4   1    7.30    3.40
 -20   4   1    9.00    2.60
 -20   4   1    0.10    3.80
  20   4  -1    1.40    4.00
  20   4  -1   11.30    2.70
  20   4  -1    7.60    4.30
 -20   4   1    9.00    4.40
 -20   4   1    6.40    5.10
  20   4  -1   10.10    5.00
 -20   4   1    7.60    7.50
  18  -4  -1   53.49    5.20
  18  -4  -1   37.00    6.10
  18  -4  -1   58.59   19.80
  18  -4  -1   48.60    5.20
 -18  -4   1   48.20    5.00
  18  -4  -1   49.10    7.00
 -18  -4   1   53.99    5.40
 -18  -4   1   31.70   10.70
 -18  -4   1   29.20   13.00
 -18  -4   1   56.69    7.40
 -18  -4   1   51.19    5.00
  18   4  -1   61.89   11.80
  18   4  -1   23.00   38.60
 -18   4   1   27.20   12.20
 -18   4   1   62.19   12.70
 -18   4   1   31.70   28.10
  18   4  -1   44.10    9.40
  18   4  -1   50.99    4.70
 -18   4   1   67.69   10.20
 -18   4   1   56.69    6.50
 -18   4   1   54.69    9.40
  18   4  -1   46.70   10.50
 -18   4   1   48.90    9.70
 -18   4   1   49.90    5.00
  16  -4  -1   28.00    4.10
 -16  -4   1   29.00    5.40
  16  -4  -1   38.70    5.50
 -16  -4   1   24.00    3.70
 -16  -4   1   28.20    3.50
 -16  -4   1   34.80    4.20
  16  -4  -1   22.00    3.90
 -16  -4   1   14.30    8.70
  16   4  -1   31.20    9.70
 -16   4   1   30.70    7.70
  16   4  -1   16.80    6.50
 -16   4   1   15.70    7.80
 -16   4   1   20.50    8.10
 -16   4   1   10.60   20.20
  16   4  -1   42.10   31.00
 -16   4   1   36.80    5.60
  16   4  -1   28.90    3.50
 -16   4   1   32.40    7.60
  16   4  -1   36.70   13.20
 -16   4   1   30.60    4.10
  16   4  -1   34.50    8.10
  16   4  -1   29.80    3.50
 -14  -4   1   49.00    5.00
  14  -4  -1   40.30    4.70
  14  -4  -1   35.80   14.00
 -14  -4   1   47.60    6.60
  14  -4  -1   50.59    5.90
  14  -4  -1   38.00   11.00
 -14  -4   1   51.29    6.40
  14   4  -1   60.69   11.30
  14   4  -1   31.70    8.30
  14   4  -1   41.80    9.30
  14   4  -1  -12.60   27.80
 -14   4   1   21.70   19.30
 -14   4   1   38.40    7.50
  14   4  -1   34.20   23.90
 -14   4   1   48.60    7.20
  14   4  -1   45.90    4.30
  14   4  -1   43.00    9.60
 -14   4   1   48.50    4.80
 -14   4   1   57.19    9.20
  14   4  -1   56.89   10.20
 -14   4   1   30.70    9.90
  14   4  -1   38.30    4.20
 -14   4   1   36.30   16.90
 -12  -4   1   81.59   11.90
 -12  -4   1   80.69    7.80
  12  -4  -1   63.19   18.00
  12  -4  -1   62.19   10.50
 -12  -4   1   85.39    6.10
  12  -4  -1   79.59    7.00
  12  -4  -1   69.79    6.20
 -12  -4   1   87.09    6.50
 -12   4   1   70.19    9.30
 -12   4   1   73.39   20.10
  12   4  -1   78.89   10.80
  12   4  -1   89.69   12.20
  12   4  -1   79.89    6.10
 -12   4   1   81.49    6.60
  12   4  -1   74.59    5.50
  12   4  -1   92.39   12.10
 -12   4   1   65.59   10.90
  12   4  -1   67.59   25.00
 -12   4   1   71.69   13.00
  12   4  -1   92.59   12.70
 -12   4   1   61.69   11.70
  12   4  -1   66.59   12.30
  12   4  -1   47.30   23.10
  12   4  -1   88.99   31.60
 -12   4   1   88.19    9.30
  10  -4  -1    6.60    3.70
 -10  -4   1    5.40    3.90
 -10  -4   1    1.20    3.00
  10  -4  -1    2.60    7.50
  10   4  -1    2.90    3.40
  10   4  -1   -7.80   12.70
 -10   4   1   -0.10    8.50
  10   4  -1    9.20    4.70
 -10   4   1    6.50    4.20
 -10   4   1    7.10    4.50
 -10   4   1   11.90   10.40
  10   4  -1   -5.60    8.30
  10   4  -1    8.50    2.30
  10   4  -1    7.60    4.80
 -10   4   1   -5.70    6.60
 -10   4   1    6.20    4.50
  10   4  -1   -0.20    4.20
  10   4  -1  -10.30   15.00
 -10   4   1    5.90    3.30
 -10   4   1    6.70    2.90
 -10   4   1    5.90    7.80
 -10   4   1    1.10    5.80
  10   4  -1    3.80    1.50
 -10   4   1    7.00    2.00
  10   4  -1    3.50    5.00
 -10   4   1    8.50    2.80
  -8  -4   1   33.00    6.90
  -8  -4   1   31.10    3.60
  -8  -4   1   33.30    4.40
   8  -4  -1    8.70   11.30
   8  -4  -1   26.90    6.90
  -8   4   1   27.40    6.70
  -8   4   1   21.60   14.30
  -8   4   1   33.30    8.50
   8   4  -1   25.00    7.50
   8   4  -1   23.30    9.50
  -8   4   1   33.50    6.80
  -8   4   1   29.50    5.00
   8   4  -1   33.70    7.90
   8   4  -1   24.50    3.70
   8   4  -1   32.90   17.10
   8   4  -1   23.20   12.70
  -8   4   1   33.10    4.40
   8   4  -1   35.00    3.80
  -8   4   1   25.00   12.20
   8   4  -1   27.00    8.60
  -8   4   1   28.20    6.40
  -8   4   1   43.60    8.70
  -8   4   1   19.20   12.80
   6  -4  -1   40.80   12.60
   6  -4  -1   55.79    8.60
  -6  -4   1   45.40    8.20
   6  -4  -1   25.60   11.60
  -6   4   1   34.20    5.20
   6   4  -1   46.60    8.10
   6   4  -1   48.00    8.90
  -6   4   1   45.00   13.20
   6   4  -1   69.09   20.40
   6   4  -1   41.10    4.60
   6   4  -1   36.20   13.70
   6   4  -1   34.20    8.10
   6   4  -1   44.40    9.60
  -6   4   1   43.60    6.90
   6   4  -1   39.90    7.70
   6   4  -1   53.39    6.70
  -6   4   1   62.79   16.60
  -6   4   1   45.00    7.30
  -6   4   1   73.79   18.20
  -6   4   1   58.09    9.50
   4  -4  -1   36.50    8.10
  -4  -4   1   32.10    7.10
  -4  -4   1   21.40    5.50
   4  -4  -1   18.00    8.00
  -4  -4   1   19.00    3.90
   4  -4  -1   44.40   12.20
   4  -4  -1   18.90    6.60
  -4   4   1   50.89   14.50
  -4   4   1   13.90   11.90
   4   4  -1   18.80    9.90
  -4   4   1   19.10   11.40
  -4   4   1   27.60    6.90
   4   4  -1   20.40    5.70
  -4   4   1   39.60    9.40
  -4   4   1   30.90    5.90
  -4   4   1   33.40   10.60
  -2  -4   1   55.39   14.50
  -2  -4   1   59.69   10.00
   2  -4  -1   67.29   14.00
  -2  -4   1   59.79    9.20
  -2  -4   1   44.70    7.40
   2  -4  -1   51.39    8.20
   2  -4  -1   59.89   15.40
   2  -4  -1   63.09    9.50
   2   4  -1   71.09   17.40
  -2   4   1   56.89    8.70
   2   4  -1   50.79   12.70
   2   4  -1   50.99    9.10
  -2   4   1   65.89   17.90
  -2   4   1   59.29   13.70
  -2   4   1   52.39    7.30
   2   4  -1   57.59   20.10
   0  -4   1    5.90    4.50
   0  -4  -1   -2.00    3.40
   0  -4   1   -0.30    3.20
   0  -4   1    2.40    4.30
   0  -4  -1    8.20    6.60
   0  -4   1    0.30    3.00
   0  -4   1   -6.40    6.00
   0  -4  -1    5.20    3.20
   0  -4  -1   13.50    5.40
   0   4  -1    2.00    9.30
   0   4  -1   10.00    7.50
   0   4  -1   17.20    7.10
   0   4   1   -4.30    4.60
   0   4   1    5.70    5.80
   0   4   1    0.80    5.10
   0   4   1    3.70    8.40
   0   4  -1    1.40    4.90
   2  -4   1   93.89   12.50
  -2  -4  -1  100.99    9.50
   2  -4   1  119.29   14.90
   2  -4   1   80.29   15.10
  -2  -4  -1   96.69   14.90
  -2  -4  -1  124.59   21.10
   2  -4   1  120.79   16.40
  -2   4  -1  100.59   12.20
  -2   4  -1  132.19   20.10
  -2   4  -1   78.99   19.60
  -2   4  -1  105.09   12.00
  -2   4  -1  124.59   19.60
   2   4   1  131.69   20.00
   2   4   1  109.29   23.40
  -2   4  -1  121.29   24.80
  -2   4  -1  112.69   13.10
   2   4   1   85.89   16.20
   2   4   1  111.99   11.10
   2   4   1   99.09   13.50
   4  -4   1   42.80   10.10
  -4  -4  -1   43.90    4.30
   4  -4   1   49.70   11.20
   4  -4   1   39.00    8.10
  -4  -4  -1   29.00   10.30
   4  -4   1   36.80   13.90
   4  -4   1   35.70    7.30
   4   4   1   26.40    6.50
   4   4   1   27.00   11.20
  -4   4  -1   23.90    9.90
  -4   4  -1   40.30    7.60
  -4   4  -1   29.70    7.80
  -4   4  -1   17.30   10.40
   4   4   1   40.10    8.90
  -4   4  -1   44.30    6.20
  -4   4  -1   40.80   11.80
   4   4   1   43.00    6.60
   4   4   1   33.20   15.40
  -4   4  -1   27.10   12.90
  -6  -4  -1   33.90    4.20
  -6  -4  -1   23.20    9.90
   6  -4   1   32.90    9.70
   6  -4   1   22.00    6.70
  -6  -4  -1   17.60    5.80
   6  -4   1   35.00   10.50
   6  -4   1   29.30   10.40
   6   4   1   74.79   21.30
   6   4   1   32.60    8.90
   6   4   1   33.40    6.90
  -6   4  -1   32.40   14.40
  -6   4  -1   36.90    6.70
  -6   4  -1   19.80    4.60
   6   4   1   37.70    7.60
  -6   4  -1   46.10    6.60
  -6   4  -1   39.90   16.30
   6   4   1   30.50    3.70
  -6   4  -1   37.20   12.30
   6   4   1   27.00    7.50
   6   4   1   21.40   12.20
  -6   4  -1   32.70   16.20
  -6   4  -1   20.10    6.00
   8  -4   1   55.59    5.10
  -8  -4  -1   60.59    8.80
   8  -4   1   42.90   18.90
  -8  -4  -1   61.09    6.20
   8  -4   1   66.29    8.40
   8  -4   1   41.30   11.80
  -8  -4  -1   69.49    5.40
   8  -4   1   72.19   13.50
  -8  -4  -1   67.69   14.00
   8   4   1   57.29    9.00
   8   4   1   82.39   19.90
  -8   4  -1   57.39   11.60
  -8   4  -1   63.99    9.70
  -8   4  -1   71.79    7.10
   8   4   1   76.69   10.50
   8   4   1   60.99    8.50
  -8   4  -1   55.69   11.60
   8   4   1   69.89    9.40
  -8   4  -1   63.29   11.00
  -8   4  -1   61.49   19.50
  -8   4  -1   79.19   20.00
   8   4   1   71.29    5.40
  -8   4  -1   60.59   18.20
   8   4   1   69.49   24.80
   8   4   1   70.79   11.80
  -8   4  -1   67.09    8.70
   8   4   1   86.99   19.70
  -8   4  -1   52.39    7.50
 -10  -4  -1    8.70    5.80
  10  -4   1   11.30    3.20
  10  -4   1   11.60    7.20
 -10  -4  -1   17.20    3.80
 -10  -4  -1    8.90    3.90
  10  -4   1    2.60    8.40
 -10  -4  -1    5.00    1.70
  10  -4   1   10.10    5.20
 -10  -4  -1    8.50    4.10
  10   4   1   23.20   16.90
  10   4   1    8.70    7.10
  10   4   1    8.50   10.30
 -10   4  -1    7.60    2.20
 -10   4  -1    3.20    3.40
 -10   4  -1   10.40    5.50
  10   4   1    6.90    4.40
 -10   4  -1   11.50    4.20
 -10   4  -1   10.40   10.30
 -10   4  -1    6.20   11.80
  10   4   1   12.50    2.60
  10   4   1    8.40    2.10
 -10   4  -1   13.90    4.60
 -10   4  -1    3.10    4.70
  10   4   1    7.90    5.20
 -10   4  -1    4.80    4.70
  10   4   1   11.80   15.20
  10   4   1   17.50    6.80
 -10   4  -1   11.90    5.20
  10   4   1   17.20    7.10
 -10   4  -1   12.50    3.70
  12  -4   1  176.78   11.30
 -12  -4  -1  178.08   13.50
  12  -4   1  177.28   12.60
 -12  -4  -1  184.98   11.90
 -12  -4  -1  176.78   23.10
  12  -4   1  173.38   24.90
  12   4   1  193.98   11.50
  12   4   1  233.68   22.70
  12   4   1  194.78   33.60
  12   4   1  177.58   18.50
 -12   4  -1  174.18   17.20
  12   4   1  202.48   18.70
 -12   4  -1  205.48   22.10
 -12   4  -1  183.28   14.10
 -12   4  -1  199.78   15.60
 -12   4  -1  185.78   11.70
  12   4   1  192.18   17.30
 -12   4  -1  181.08   18.60
  12   4   1  186.98   35.60
 -12   4  -1  223.58   32.30
 -12   4  -1  183.98   17.40
 -12   4  -1  190.58   34.10
  12   4   1  125.49   38.30
  12   4   1  166.98   11.10
  12   4   1  188.88   16.40
 -12   4  -1  193.48   16.10
 -14  -4  -1   42.40    4.70
 -14  -4  -1   48.50   13.70
  14  -4   1   43.40    4.70
  14  -4   1   41.40    6.00
 -14  -4  -1   41.00    4.10
 -14  -4  -1   46.70    5.60
  14  -4   1   27.10   12.00
 -14  -4  -1   60.99   15.10
 -14  -4  -1   37.90    6.00
 -14   4  -1   45.10    9.40
 -14   4  -1   54.29   16.50
 -14   4  -1   27.80    6.70
 -14   4  -1   53.69   11.70
 -14   4  -1   52.99    6.40
  14   4   1   36.10   30.90
  14   4   1   54.29   11.10
 -14   4  -1   69.79   13.70
  14   4   1   44.10    4.20
 -14   4  -1   49.00    9.20
 -14   4  -1   41.40    4.40
 -14   4  -1   47.20   10.70
  14   4   1   55.39   10.80
 -14   4  -1   20.90   18.70
  14   4   1   35.60   20.10
  14   4   1   49.60    8.80
  14   4   1   54.89    5.80
  14   4   1   26.40   14.40
  14   4   1   28.80   25.50
 -16  -4  -1   73.59   17.30
  16  -4   1   75.69    6.40
 -16  -4  -1   70.99    6.50
 -16  -4  -1   80.79    6.30
 -16  -4  -1   81.49    8.30
 -16  -4  -1   72.89   18.60
  16  -4   1   67.29    6.30
  16  -4   1   43.50   17.00
 -16  -4  -1   66.89    6.40
  16  -4   1   79.79    8.40
  16   4   1   65.79   12.00
  16   4   1  188.68   68.89
  16   4   1   74.99   10.60
  16   4   1   75.09   13.20
  16   4   1   20.50   32.20
  16   4   1   23.70   27.60
  16   4   1   73.89    5.90
 -16   4  -1   59.39    9.90
 -16   4  -1   73.89    6.20
 -16   4  -1   76.99   11.10
 -16   4  -1   62.29   17.60
 -16   4  -1   71.39   11.40
 -16   4  -1   86.89   14.20
 -16   4  -1   76.79    7.30
  16   4   1   84.09   13.10
 -16   4  -1   80.29   10.60
  18  -4   1   -3.70   15.90
  18  -4   1   25.40    5.70
 -18  -4  -1   17.20    3.90
  18  -4   1   24.40    4.00
 -18  -4  -1   27.50    4.30
 -18  -4  -1   26.80    5.40
  18  -4   1   32.30    6.00
 -18  -4  -1   22.10    3.80
 -18   4  -1   29.10    8.50
 -18   4  -1   29.60    6.80
 -18   4  -1   22.80    8.50
 -18   4  -1   24.50    3.70
 -18   4  -1   -4.90   25.30
 -18   4  -1   24.40    4.40
 -18   4  -1   13.10   11.10
 -18   4  -1   29.10    9.50
  18   4   1   25.20    9.50
  18   4   1   26.20    3.40
  18   4   1  -20.00   34.80
  18   4   1   32.90    7.90
  18   4   1   12.90    7.30
  18   4   1   22.60    9.60
  20  -4   1   16.00    3.10
  20  -4   1   15.60    3.80
 -20  -4  -1   14.40    5.10
 -20  -4  -1   14.80    3.00
 -20  -4  -1   18.90    3.70
  20  -4   1   13.20    4.90
 -20  -4  -1   11.10    3.50
  20   4   1   14.40    6.30
 -20   4  -1   20.00    6.10
 -20   4  -1    7.70    4.20
  20   4   1    9.50    4.80
  20   4   1   16.60    3.20
  20   4   1   12.30    6.60
 -20   4  -1    4.40    6.60
 -20   4  -1   11.50    6.20
 -20   4  -1   13.70    3.10
  20   4   1   12.30    4.90
 -20   4  -1   12.40    2.70
 -22  -4  -1   13.70    3.10
 -22  -4  -1   16.40    5.80
 -22  -4  -1   15.40    3.00
  22  -4   1   18.10    3.50
  22  -4   1   16.40    2.90
 -22  -4  -1   12.90    3.40
  22  -4   1   16.80    7.20
 -22   4  -1   21.70    5.70
 -22   4  -1   11.00    5.70
 -22   4  -1   20.10    6.60
  22   4   1   14.60    4.90
  22   4   1   17.90    6.40
  22   4   1   13.30    6.00
 -22   4  -1   16.00    3.00
  22   4   1    8.10    4.30
 -22   4  -1   17.90    3.30
 -24  -4  -1   23.80    3.50
 -24  -4  -1   19.20    3.90
  24  -4   1   22.90    3.20
  24  -4   1   24.50    6.10
 -24  -4  -1   20.30    3.40
  24  -4   1   18.00    3.60
 -24  -4  -1   22.60    2.90
  24  -4   1   27.60    3.80
  24   4   1   23.20    6.00
  24   4   1   19.30    6.10
  24   4   1   19.10    4.40
 -24   4  -1   23.60    3.10
 -24   4  -1   32.10    5.30
 -24   4  -1   14.40    5.90
  24   4   1   17.60    4.20
 -24   4  -1   22.20    5.90
  26  -4   1    1.80    1.20
  26  -4   1    2.20    1.40
 -26  -4  -1    5.80    1.90
 -26  -4  -1    0.60    1.20
 -26   4  -1    6.50    2.90
  26   4   1   -0.40    1.80
 -26   4  -1    3.20    2.90
  26   4   1    0.60    2.10
 -26   4  -1    1.10    1.10
 -26   4  -1    0.70    1.50
  26   4   1    0.30    2.00
  23  -5  -1   19.00    3.00
  23  -5  -1   16.10    3.00
 -23  -5   1   15.00    3.00
 -23  -5   1   16.40    2.50
  23   5  -1   14.70    5.20
 -23   5   1    7.20    4.10
 -23   5   1   13.90    2.30
  23   5  -1   10.40    4.00
  23   5  -1   15.20    3.90
 -23   5   1   17.40    4.70
  21  -5  -1    4.10    2.90
  21  -5  -1    2.70    1.80
 -21  -5   1    3.20    1.50
 -21  -5   1    0.30    2.60
 -21  -5   1    3.30    2.10
 -21  -5   1   -1.40    2.90
 -21   5   1    4.10    3.90
 -21   5   1    3.70    1.40
  21   5  -1    2.60    3.80
  21   5  -1    3.40    3.50
 -21   5   1    3.50    4.60
 -21   5   1    0.60    3.30
  21   5  -1    2.30    2.60
 -19  -5   1    0.70    1.30
  19  -5  -1    4.80    1.80
  19  -5  -1    3.50    1.70
 -19  -5   1    3.70    4.30
  19  -5  -1    2.80    2.80
 -19  -5   1    0.60    1.20
 -19   5   1    0.50    1.50
 -19   5   1    7.90    4.80
 -19   5   1   -0.80    3.80
  19   5  -1   -0.60    2.70
  19   5  -1    2.30    3.00
 -19   5   1    1.60    3.10
  19   5  -1    1.00    1.10
 -19   5   1    5.60    5.60
 -19   5   1    1.60    1.20
  19   5  -1    5.20    3.80
  19   5  -1    0.10    3.40
  17  -5  -1   22.80    3.70
  17  -5  -1   32.20    6.40
 -17  -5   1   21.00    3.60
 -17  -5   1   19.00    3.60
 -17  -5   1   18.30    5.30
  17  -5  -1   23.30    4.00
 -17  -5   1   23.00    3.40
  17   5  -1   14.20    5.80
 -17   5   1   23.50    4.40
  17   5  -1   16.10    6.00
  17   5  -1   22.70    6.80
 -17   5   1   20.80    6.40
 -17   5   1   25.50   11.90
 -17   5   1   11.30    5.40
  17   5  -1   21.80    2.80
 -17   5   1   27.10    7.80
 -17   5   1   22.50    3.20
  15  -5  -1   44.20    4.80
 -15  -5   1   35.60    4.40
 -15  -5   1   45.90    6.30
  15  -5  -1   45.10    6.00
 -15  -5   1   39.30    4.10
 -15  -5   1   44.80    4.50
 -15   5   1   34.60    7.30
  15   5  -1   23.10    7.50
 -15   5   1   44.50   12.60
 -15   5   1   46.70   17.50
  15   5  -1   33.90   10.30
  15   5  -1   33.20    9.00
 -15   5   1   46.80   10.50
  15   5  -1   40.30    4.00
  15   5  -1   37.00    8.90
 -13  -5   1   -1.10    9.80
  13  -5  -1   14.30    3.80
  13  -5  -1   -7.60   13.00
 -13  -5   1    7.40    5.10
 -13   5   1    7.60    8.70
 -13   5   1  -13.40   21.50
 -13   5   1   -1.00    5.40
  13   5  -1   20.30    7.20
 -13   5   1   19.10    5.40
  13   5  -1   -3.50   17.80
 -13   5   1    6.70    4.80
  13   5  -1    7.50    5.50
  13   5  -1   11.60    4.80
  13   5  -1   16.50    6.90
 -11  -5   1   58.39   16.20
  11  -5  -1   56.29    6.00
 -11  -5   1   59.29    6.90
 -11  -5   1   29.20   11.20
 -11  -5   1   54.39    5.20
  11  -5  -1   38.10   15.40
  11   5  -1   44.30   24.70
 -11   5   1   64.09    8.10
  11   5  -1   65.49   34.20
 -11   5   1   94.59   28.70
  11   5  -1   49.00    4.40
  11   5  -1   42.30    9.20
 -11   5   1   72.69   20.00
  11   5  -1   51.99    4.70
 -11   5   1   50.99    8.60
  11   5  -1   55.89    9.70
  11   5  -1   48.60   11.40
  11   5  -1   57.09    8.70
  11   5  -1   62.59   10.30
 -11   5   1   59.79    5.60
 -11   5   1   49.60   10.60
   9  -5  -1   27.20   12.70
  -9  -5   1   33.90    5.10
   9  -5  -1   26.20    4.50
  -9  -5   1   33.80   14.30
  -9  -5   1   31.50    4.10
  -9  -5   1   24.70    9.00
   9   5  -1   17.90   16.30
  -9   5   1   35.80    5.50
   9   5  -1   19.60   25.00
  -9   5   1   35.70    4.90
  -9   5   1   16.40   13.80
  -9   5   1   25.90   13.20
  -9   5   1   22.70    5.40
  -9   5   1   38.40    8.80
   9   5  -1   25.60    3.50
   9   5  -1   41.40    7.40
   9   5  -1   27.30    7.40
   9   5  -1   27.40    9.20
  -9   5   1   32.70   16.10
  -9   5   1   34.80    5.90
  -9   5   1   25.50    6.60
   9   5  -1   36.80   10.10
   9   5  -1   38.30    7.60
   9   5  -1   37.40    3.80
  -7  -5   1   40.30   11.00
   7  -5  -1   58.39   19.40
   7  -5  -1   45.90   16.30
  -7  -5   1   51.99    6.40
   7   5  -1   68.79    9.00
  -7   5   1   72.49    9.10
   7   5  -1   74.49   11.60
  -7   5   1   58.29   21.50
   7   5  -1   39.50   10.60
  -7   5   1   72.79   23.60
  -7   5   1   51.59    8.40
   7   5  -1   15.70   26.20
  -7   5   1   58.49    6.40
   7   5  -1   66.59   10.10
  -7   5   1   63.09    7.20
  -7   5   1   72.09   20.90
   7   5  -1   50.19    5.40
   7   5  -1   40.50   18.80
  -7   5   1   61.19   10.40
  -7   5   1   63.49    7.90
   7   5  -1   59.49    5.30
   5  -5  -1   13.90    7.50
  -5  -5   1   18.90    6.50
   5  -5  -1   -5.40   15.60
  -5  -5   1   17.80    8.50
  -5  -5   1   21.70    4.50
  -5   5   1   26.20    6.70
   5   5  -1    7.00    8.30
  -5   5   1   45.20   27.70
  -5   5   1   29.00    6.50
  -5   5   1   24.20   19.70
  -5   5   1   19.20   13.00
   5   5  -1   45.90   18.90
  -5   5   1   42.00   17.00
  -5   5   1   22.60    8.30
   5   5  -1   22.00    4.00
   5   5  -1   19.80   14.20
  -5   5   1   26.60    6.60
   5   5  -1   29.40   10.20
  -5   5   1   33.60    4.70
   5   5  -1   25.60    5.50
   5   5  -1   22.20    7.90
  -5   5   1   15.60    4.70
   5   5  -1   28.30    9.80
   5   5  -1   32.40    3.80
   5   5  -1   20.10    6.50
  -3  -5   1   -3.00    5.00
   3  -5  -1   -2.00    6.40
   3  -5  -1   23.70    7.70
  -3   5   1   -1.00    2.90
   3   5  -1    1.90    3.10
  -3   5   1    5.60    6.90
   3   5  -1    9.00   10.20
  -3   5   1    6.90    3.50
   3   5  -1    7.90    3.50
   3   5  -1   -5.80   12.10
  -3   5   1   12.50    9.20
   3   5  -1    7.10    5.30
  -3   5   1    7.10    3.40
   3   5  -1    5.20    4.40
  -3   5   1    4.30    3.40
   3   5  -1    4.30    6.80
  -3   5   1    8.20    3.50
  -3   5   1   -0.80   10.80
  -3   5   1   11.70    4.00
  -3   5   1    7.40    4.10
  -3   5   1    0.00    7.50
   3   5  -1   -4.20    5.70
   3   5  -1    7.30    6.80
  -1  -5   1    9.70    7.30
  -1  -5   1    0.80    5.40
   1  -5  -1    4.90    6.20
  -1   5   1    5.40    3.70
   1   5  -1   10.60    4.60
   1   5  -1    5.60    7.10
  -1   5   1    0.00   11.10
   1   5  -1    2.10    1.80
  -1   5   1    0.60    3.20
  -1   5   1    9.20    3.80
   1   5  -1    3.80    2.80
   1   5  -1    1.60    2.40
  -1   5   1   -4.70    7.80
   1   5  -1    2.80    3.00
  -1   5   1    4.20    3.30
  -1   5   1    7.40    8.00
  -1   5   1   13.00    4.20
   1   5  -1    0.20    8.00
   1  -5   1   14.00    8.90
   1  -5   1   22.40    7.70
  -1  -5  -1   20.10    4.10
  -1  -5  -1   11.90    7.50
   1   5   1   11.00   10.40
  -1   5  -1   17.50   14.70
   1   5   1   14.60    3.80
  -1   5  -1   11.10    3.50
  -1   5  -1   20.10    6.00
   1   5   1   14.90    3.80
  -1   5  -1   17.70   10.50
   1   5   1   23.60    5.40
   1   5   1   21.60    6.40
   1   5   1    9.20    9.60
  -1   5  -1    7.30    3.00
  -1   5  -1   22.50    5.40
  -1   5  -1   18.00    6.60
   1   5   1   16.10    5.00
  -1   5  -1   15.70   10.50
  -1   5  -1    3.90    5.00
  -1   5  -1   10.30    3.20
   1   5   1   16.10    5.00
   1   5   1   20.00    7.20
  -3  -5  -1   11.60    7.70
  -3  -5  -1   10.40    4.40
   3   5   1   24.60    6.90
  -3   5  -1   20.50    4.50
   3   5   1    4.60    9.50
  -3   5  -1   27.70   12.10
  -3   5  -1   20.50   15.40
  -3   5  -1   17.20    3.90
  -3   5  -1    9.20    8.70
  -3   5  -1   24.20    6.50
  -3   5  -1   25.70    6.50
   3   5   1   18.80    4.80
   3   5   1   19.20    5.80
  -3   5  -1   32.70    5.30
   3   5   1   11.20    9.30
  -3   5  -1   24.90    7.00
   3   5   1   14.40    5.70
   3   5   1   23.50    4.90
  -3   5  -1   15.30   13.10
   3   5   1   23.50    3.20
   3   5   1   17.00    5.50
   3   5   1   20.40    6.20
   3   5   1    7.20   12.70
  -3   5  -1   13.00    4.00
   5  -5   1    4.80    8.80
  -5  -5  -1   14.70    4.20
  -5  -5  -1   14.50    7.40
   5  -5   1  -12.40   11.10
   5   5   1   11.10    6.90
   5   5   1   -1.60   10.30
   5   5   1   26.60    6.10
   5   5   1   11.80    2.70
  -5   5  -1   24.10   16.00
   5   5   1   -5.60   14.10
   5   5   1   11.90   12.00
  -5   5  -1   10.70    3.50
   5   5   1    5.20    5.20
  -5   5  -1   -0.50   12.60
   5   5   1   14.20    2.60
  -5   5  -1   20.50    5.90
  -5   5  -1   12.80   10.20
  -5   5  -1   15.60    6.40
  -5   5  -1   10.10    3.50
  -5   5  -1   16.20    5.70
  -7  -5  -1   46.20    5.70
  -7  -5  -1   47.50    5.00
  -7  -5  -1   26.40    9.30
   7   5   1   48.30    9.20
  -7   5  -1   51.69    7.40
   7   5   1   29.30    9.80
  -7   5  -1   64.19    8.30
  -7   5  -1   32.20    8.10
   7   5   1   50.09   11.00
   7   5   1   53.89    7.30
  -7   5  -1   12.40   15.70
  -7   5  -1   50.99    6.40
  -7   5  -1   32.80   19.00
   7   5   1   25.20   12.80
   7   5   1   41.90    4.40
   7   5   1   47.50    7.80
   7   5   1   47.50    4.30
  -7   5  -1   28.60    9.00
  -7   5  -1   38.30   15.70
  -7   5  -1   47.80    7.40
   7   5   1  102.69   35.40
   7   5   1   60.29    9.20
  -9  -5  -1   31.60    5.10
   9  -5   1   21.40    4.90
  -9  -5  -1   25.10    3.90
  -9   5  -1   27.30    8.10
   9   5   1   21.50    7.60
   9   5   1   35.40    7.60
  -9   5  -1   20.10   15.70
   9   5   1   28.40    7.30
   9   5   1   19.60    3.10
  -9   5  -1   28.30    5.40
  -9   5  -1   39.90    7.40
   9   5   1   26.20   16.60
   9   5   1   27.10    3.20
  -9   5  -1   17.50   11.40
   9   5   1   42.50   21.50
  -9   5  -1   30.10    3.80
  -9   5  -1   21.60    5.80
   9   5   1   18.10    7.90
   9   5   1   32.50    6.90
  -9   5  -1   24.30    4.80
  -9   5  -1   17.70    6.00
  11  -5   1   46.80    5.90
 -11  -5  -1   42.60    4.40
 -11  -5  -1   42.00    4.50
 -11  -5  -1   22.30   10.10
 -11  -5  -1   36.50    5.80
  11  -5   1   21.10   13.50
 -11   5  -1   36.10    7.10
 -11   5  -1   42.60   15.00
 -11   5  -1   15.30   20.50
  11   5   1   35.50    9.70
  11   5   1   47.00    8.20
 -11   5  -1   49.00   10.50
  11   5   1   34.50    3.90
  11   5   1   46.50   21.40
  11   5   1   45.40    8.60
 -11   5  -1   30.20    7.50
  11   5   1   45.60    8.70
  11   5   1   53.09    8.70
  11   5   1   48.10   32.90
 -11   5  -1   34.40    6.00
 -11   5  -1   41.10    6.40
  11   5   1   43.10    4.10
 -11   5  -1   51.39    4.60
 -13  -5  -1   98.09   20.70
 -13  -5  -1  111.49    7.90
  13  -5   1  116.49   10.10
  13  -5   1  101.79    8.00
  13  -5   1  104.19   24.40
 -13  -5  -1  114.09   11.60
 -13  -5  -1   97.39    9.20
 -13  -5  -1  110.09    8.30
  13   5   1  101.19   15.50
 -13   5  -1  119.69    9.50
 -13   5  -1   96.09    7.50
  13   5   1  107.39   12.10
 -13   5  -1  120.59   11.90
  13   5   1   64.79   48.50
 -13   5  -1  110.39   24.70
  13   5   1   92.59   12.00
  13   5   1   91.09   12.30
  13   5   1  105.39   43.30
 -13   5  -1  135.89   17.10
  13   5   1  106.49   11.30
 -13   5  -1  107.29   41.10
  13   5   1  111.89    7.50
 -13   5  -1  111.69   13.10
 -15  -5  -1    2.40    2.60
  15  -5   1    0.70    1.80
 -15  -5  -1    4.50    2.50
  15  -5   1   10.10    3.20
 -15  -5  -1    9.30    3.00
 -15  -5  -1    4.20    1.90
  15   5   1    3.40    4.80
  15   5   1    8.60    2.10
 -15   5  -1    9.80    2.50
  15   5   1    7.60    3.60
  15   5   1    3.80    4.40
 -15   5  -1    7.20    4.50
 -15   5  -1   -0.90    3.40
 -15   5  -1    5.40    2.70
 -15   5  -1   -0.20    4.20
  15   5   1    5.10    4.30
 -15   5  -1    2.20    6.30
  17  -5   1    1.50    1.70
  17  -5   1    4.70    2.10
 -17  -5  -1    1.70    2.50
 -17  -5  -1    5.60    2.60
  17  -5   1    5.10    2.80
 -17  -5  -1    4.10    1.70
 -17  -5  -1    2.50    1.60
 -17   5  -1    0.00    1.60
  17   5   1   -1.70    2.50
  17   5   1    2.50    4.10
  17   5   1    3.40    3.20
 -17   5  -1    4.10    3.70
 -17   5  -1   -0.50    3.90
  17   5   1    9.50    4.60
 -17   5  -1    3.20    1.50
  17   5   1    2.60    1.20
 -17   5  -1    2.00    5.20
 -17   5  -1    1.50    3.40
 -19  -5  -1    6.70    2.70
 -19  -5  -1    3.50    2.40
 -19  -5  -1    4.20    2.70
 -19  -5  -1    7.50    2.50
  19  -5   1    8.10    2.90
  19  -5   1    6.80    2.30
  19   5   1    3.70    3.10
 -19   5  -1    2.00    2.90
 -19   5  -1    6.40    4.10
  19   5   1    3.70    3.90
 -19   5  -1    1.10    4.10
 -19   5  -1    6.50    2.30
  19   5   1    6.70    2.20
  19   5   1   11.60    4.50
 -19   5  -1    2.90    1.60
  19   5   1    2.20    3.50
 -21  -5  -1   10.70    2.80
  21  -5   1    6.20    2.30
 -21  -5  -1   14.10    2.60
  21  -5   1   11.70    4.00
  21  -5   1   17.90    7.60
 -21  -5  -1    5.70    3.90
  21  -5   1   11.20    3.20
  21   5   1   11.70    4.60
  21   5   1    5.80    4.00
 -21   5  -1   13.20    4.80
 -21   5  -1    8.90    2.50
  21   5   1   17.20    4.80
 -21   5  -1    7.70    3.70
 -21   5  -1   11.10    3.30
  21   5   1   17.30    4.30
  23  -5   1    0.30    1.50
  23  -5   1    0.70    1.00
 -23  -5  -1    0.90    1.60
 -23  -5  -1    0.20    1.10
 -23  -5  -1    2.00    1.70
  23   5   1    1.40    2.10
  23   5   1    3.90    2.50
  23   5   1    1.50    2.40
 -23   5  -1   -0.80    2.00
 -23   5  -1    2.40    2.00
 -23   5  -1    1.80    1.20
 -20  -6   1   20.60    2.90
 -20  -6   1   21.60    2.90
 -20   6   1   15.20    4.70
 -20   6   1   21.30    2.30
  20   6  -1   17.20    3.70
 -18  -6   1    8.60    2.50
 -18  -6   1    8.30    2.20
 -18  -6   1   17.40    4.50
 -18   6   1    7.50    1.70
  18   6  -1   10.30    3.90
  18   6  -1    7.10    4.40
 -18   6   1    9.50    2.30
 -18   6   1    6.00    3.20
  18   6  -1    6.80    1.60
  18   6  -1    4.90    2.60
 -16  -6   1   29.50    3.90
 -16  -6   1   28.40    3.40
  16  -6  -1   32.50    7.50
 -16   6   1   31.20    4.00
  16   6  -1   21.70    6.50
  16   6  -1   26.40    5.60
  16   6  -1   39.60   10.20
 -16   6   1   33.80    3.20
  16   6  -1   29.20    3.30
  14  -6  -1    2.00    3.40
 -14  -6   1   11.70    4.60
 -14  -6   1    4.30    1.70
 -14  -6   1    5.20    2.50
 -14   6   1    0.80    3.40
  14   6  -1    9.40    4.50
  14   6  -1    9.30    3.80
  14   6  -1    3.70    3.70
  14   6  -1    9.70    4.10
  14   6  -1    3.30    4.90
 -14   6   1    6.50    3.60
 -14   6   1    8.20    7.50
  14   6  -1    9.30    1.90
 -14   6   1    5.00    2.20
 -12  -6   1   82.79    6.50
 -12  -6   1   81.29    8.00
 -12  -6   1   75.79    6.30
 -12   6   1   64.49   19.00
  12   6  -1   70.19   10.00
  12   6  -1   73.19    9.40
  12   6  -1   88.89    5.80
 -12   6   1   78.29    7.50
  12   6  -1   74.59    5.70
  12   6  -1   71.49    8.80
 -12   6   1   76.39   12.00
  12   6  -1   73.09    9.60
 -12   6   1   79.39    6.00
 -10  -6   1  116.49   10.00
 -10  -6   1   91.99    7.70
  10   6  -1  110.99    7.20
  10   6  -1  106.39   10.70
 -10   6   1  110.89   24.90
 -10   6   1  118.39   14.70
 -10   6   1  109.79    8.10
 -10   6   1  116.79   10.30
  10   6  -1  112.39   12.30
  10   6  -1  119.89   12.90
  10   6  -1  120.39    7.70
  -8  -6   1   68.79    6.60
  -8  -6   1   73.79    7.40
   8   6  -1   79.79   11.10
  -8   6   1   69.79   11.20
   8   6  -1   83.79    8.90
  -8   6   1   80.69    6.70
  -8   6   1   60.49   19.80
  -8   6   1   93.19    8.70
  -8   6   1   80.89    8.70
   8   6  -1   68.89    5.50
   8   6  -1   76.89    6.00
   8   6  -1   96.89   11.20
  -6  -6   1   47.40    6.50
  -6   6   1   49.60    6.40
   6   6  -1   57.29    8.70
   6   6  -1   56.39    9.60
  -6   6   1   43.90    8.30
  -6   6   1   52.79    9.10
  -6   6   1   51.69    6.50
  -6   6   1   44.70    6.80
   6   6  -1   37.50    5.50
   6   6  -1   50.09    5.10
  -4  -6   1   -5.40   18.50
  -4  -6   1   13.20    5.30
   4   6  -1   24.00   18.10
  -4   6   1    1.00   16.60
   4   6  -1    2.80    6.40
  -4   6   1   13.20    5.20
  -4   6   1   -1.40    3.90
   4   6  -1   10.80    4.50
  -4   6   1    9.40    4.60
   4   6  -1    8.30    2.40
  -4   6   1   13.90    4.40
  -4   6   1    7.80    8.90
  -4   6   1   23.80    6.10
   4   6  -1   19.30    5.30
   4   6  -1    8.60    4.10
   4   6  -1  -16.10   24.30
   4   6  -1   15.20    3.00
  -4   6   1   -3.40   13.80
  -2   6   1    6.40    4.40
   2   6  -1   10.00    4.30
   2   6  -1    3.10    4.30
   2   6  -1    0.40    2.00
  -2   6   1   -2.10    7.90
  -2   6   1   -9.20   16.60
   2   6  -1    1.20    1.60
  -2   6   1    5.00   12.20
   2   6  -1   -0.70    5.20
   2   6  -1    4.40    2.20
   2   6  -1  -16.50   12.00
  -2   6   1    2.30    2.50
   2   6  -1    5.60   22.00
   2   6  -1   12.90    4.60
  -2   6   1   12.30    4.20
  -2   6   1    7.70    3.60
  -2   6   1    3.30    1.90
  -2   6   1    1.90    3.20
   2   6  -1    2.10    5.20
   0   6  -1   35.60    6.50
   0   6  -1   37.40    5.80
   0   6  -1   38.70    4.90
   0   6  -1   34.40    8.30
   0   6   1   15.40   15.30
   0   6   1   49.10    6.30
   0   6  -1   49.40    7.60
   0   6  -1   24.20   14.80
   0   6   1   49.99    7.60
   0   6   1   44.60    4.70
   0   6  -1   25.50   21.70
   0   6   1   37.00   13.90
   0   6   1   45.80   23.70
   0   6  -1   39.50    8.80
   0   6  -1   31.40   12.40
   0   6   1   38.20    6.70
   0   6  -1   28.90    5.30
   0   6   1   55.39    8.80
   0   6   1   51.79    9.50
  -2  -6  -1    0.00    2.80
  -2   6  -1    3.40    3.60
  -2   6  -1  -16.80   17.50
   2   6   1    6.30    3.70
  -2   6  -1    1.30    2.30
  -2   6  -1    1.00    2.40
   2   6   1    8.00    2.40
  -2   6  -1    5.00    3.80
   2   6   1  -12.50   12.40
  -2   6  -1    3.40    2.20
   2   6   1    1.80    6.50
  -2   6  -1   -0.40    4.90
  -2   6  -1   29.00   17.40
   2   6   1    6.20    4.80
  -2   6  -1    6.40    3.10
  -2   6  -1    4.50    2.40
   2   6   1    2.10    3.50
   2   6   1   -4.50   21.90
   2   6   1   14.10    4.40
  -4  -6  -1   63.69    6.90
   4   6   1   77.39   10.60
   4   6   1   67.99   12.10
   4   6   1   34.30   20.10
  -4   6  -1   66.19   28.80
  -4   6  -1   48.70   20.50
  -4   6  -1   47.50    7.70
  -4   6  -1   75.29    9.30
  -4   6  -1   67.99   10.00
   4   6   1   64.99    5.40
   4   6   1   39.00   12.30
  -4   6  -1   60.59    7.70
  -4   6  -1   64.09    7.60
  -4   6  -1   74.19   19.30
   4   6   1   16.50   30.20
  -4   6  -1   58.09    6.30
  -4   6  -1   71.69    7.20
  -4   6  -1   21.00   23.10
   4   6   1   74.09    9.50
   4   6   1   70.99    8.50
  -6  -6  -1   48.60    5.20
  -6  -6  -1   41.90    6.00
   6   6   1   42.30    8.10
  -6   6  -1   68.29    8.50
   6   6   1   48.20   10.10
  -6   6  -1   49.50    6.30
  -6   6  -1   55.49    6.90
  -6   6  -1   35.00    8.00
  -6   6  -1   59.59   17.60
  -6   6  -1   42.40    7.70
  -6   6  -1   45.90    7.10
   6   6   1   37.80    9.80
  -8  -6  -1   42.90    6.20
  -8  -6  -1   45.50    5.00
   8   6   1   56.69    8.30
  -8   6  -1   58.29    6.40
   8   6   1   49.90    4.30
   8   6   1   60.09    8.80
  -8   6  -1   43.10    6.80
   8   6   1   47.20    8.60
  -8   6  -1   48.70    4.70
  -8   6  -1   33.40    8.60
  -8   6  -1   51.09    7.10
  -8   6  -1   43.00   14.50
 -10  -6  -1   21.80    7.30
  10   6   1    9.50    2.00
 -10   6  -1   20.40    5.60
 -10   6  -1    4.00    2.20
 -10   6  -1    2.20    3.30
 -10   6  -1   -0.70    6.40
  10   6   1    7.70    4.30
  10   6   1    2.50    4.80
 -12  -6  -1   81.19    8.70
 -12  -6  -1   89.09    6.70
 -12  -6  -1   81.29    6.80
  12   6   1   81.89    9.80
  12   6   1   66.49   12.00
  12   6   1   77.69   10.50
 -12   6  -1   67.49   18.00
  12   6   1   88.09    9.00
 -12   6  -1   76.99    5.90
 -12   6  -1   77.99    9.20
  12   6   1   90.49    6.00
 -12   6  -1   82.09   12.40
 -12   6  -1   86.59    7.30
  14  -6   1    0.20    6.70
 -14  -6  -1   12.40    4.80
 -14  -6  -1   19.50    3.40
  14   6   1   11.20    2.30
  14   6   1   13.00    4.90
 -14   6  -1    6.20    4.30
  14   6   1   23.40    6.10
 -14   6  -1   12.30    2.40
  14   6   1   16.90    5.80
 -14   6  -1   12.30    3.10
 -14   6  -1   10.50    4.00
 -14   6  -1   12.70    7.50
  14   6   1    5.50    5.40
 -16  -6  -1   68.59    5.30
 -16  -6  -1   66.39    5.50
  16  -6   1   60.69    6.40
 -16  -6  -1   65.49    6.90
 -16   6  -1   58.19   10.10
  16   6   1   51.39    7.00
 -16   6  -1   68.99    5.50
 -16   6  -1   56.29    4.70
  16   6   1   64.69    4.70
  16   6   1   45.40    8.50
  16   6   1   46.10    9.40
  18   6   1   14.20    5.40
  18   6   1    8.30    3.50
 -18   6  -1   10.70    3.00
 -18   6  -1    9.30    2.10
 -18   6  -1   17.80    4.90
  18   6   1    7.60    4.50
 -20  -6  -1   14.50    2.40
 -20  -6  -1   15.50    3.20
 -20  -6  -1   11.80    2.20
 -20   6  -1   11.60    1.80
  20   6   1    9.40    3.90
 -20   6  -1    8.10    3.30
  20   6   1   14.40    2.60
 -15  -7   1    4.00    1.40
 -15   7   1    4.30    1.70
  15   7  -1    6.20    1.20
  15   7  -1    9.30    2.50
 -15   7   1    2.50    3.20
 -13  -7   1    2.70    1.70
 -13   7   1    2.90    2.20
 -13   7   1    4.90    1.80
  13   7  -1    4.80    1.60
  13   7  -1    4.50    3.00
 -13   7   1    2.00    3.80
 -11  -7   1   11.60    3.10
 -11  -7   1   10.60    2.80
 -11   7   1   11.50    6.70
  11   7  -1   10.30    4.10
  11   7  -1    5.40    2.70
  11   7  -1   14.00    3.60
 -11   7   1   11.20    3.60
 -11   7   1   16.30    2.30
 -11   7   1    7.60    2.60
  -9  -7   1   14.60    3.60
  -9   7   1    8.30    2.60
  -9   7   1    3.60    5.20
   9   7  -1    7.80    3.60
   9   7  -1    7.90    5.30
  -9   7   1    5.60    2.00
  -9   7   1    7.40    3.10
   9   7  -1    7.70    1.70
   9   7  -1   12.40    4.30
   7   7  -1    2.50    3.20
  -7   7   1    2.10    1.90
  -7   7   1    1.40    2.00
  -7   7   1    3.20    5.00
   7   7  -1    2.30    1.10
   7   7  -1    2.30    2.90
  -7   7   1    4.00    1.50
   5   7  -1   14.00    4.40
  -5   7   1   14.90    2.40
  -5   7   1   14.00    4.80
  -5   7   1   15.60    3.60
  -5   7   1   12.60    3.70
   5   7  -1   14.40    2.10
   5   7  -1   13.00    3.60
   5   7  -1   10.40    3.90
  -3   7   1    7.50    6.90
  -3   7   1   13.30    3.30
   3   7  -1   21.00    3.70
   3   7  -1   22.30    4.60
   3   7  -1   20.50    6.40
   3   7  -1   14.80    2.30
  -3   7   1   16.60    4.00
  -3   7   1   18.90    4.90
   1   7  -1   19.20    5.50
  -1   7   1    3.90    2.70
  -1   7   1   10.10    3.30
   1   7  -1    8.10    3.00
   1   7  -1   14.80    4.10
  -1   7   1   15.80    4.90
  -1   7   1   12.50    3.90
   1   7   1   27.20    5.00
   1   7   1   25.80    4.70
   1   7   1   31.30    6.10
  -1   7  -1   36.70    5.20
  -1   7  -1   23.60    2.90
  -1   7  -1   23.80    5.60
  -1   7  -1   27.40    3.40
   3   7   1    7.70    3.00
  -3   7  -1    3.30    4.10
  -3   7  -1   -1.40    3.60
   3   7   1   13.90    4.90
   3   7   1    5.30    1.80
  -3   7  -1    4.00    2.50
  -3   7  -1   11.20    3.50
  -3   7  -1    5.50    2.80
   3   7   1    7.70    4.20
  -3   7  -1    9.50    2.30
  -5   7  -1    9.10    3.60
   5   7   1    8.60    3.40
  -5   7  -1    8.90    2.70
  -5   7  -1    3.00    2.30
   5   7   1   13.20    3.90
   5   7   1   13.30    4.60
   5   7   1    5.00    1.80
  -5   7  -1    9.10    3.20
  -5   7  -1   13.70    4.10
  -5   7  -1    0.80    5.00
  -7  -7  -1   21.20    5.00
  -7   7  -1    9.00    2.80
   7   7   1   11.00    3.70
   7   7   1    8.60    2.10
   7   7   1   12.30    4.90
   7   7   1   11.10    4.20
  -7   7  -1    1.70    4.90
  -7   7  -1   14.40    3.30
  -9  -7  -1    1.50    2.30
   9   7   1    2.80    1.10
  -9   7  -1    5.30    3.10
  -9   7  -1    2.50    4.10
   9   7   1    5.60    3.30
   9   7   1    2.40    2.20
  -9   7  -1    3.20    2.00
   9   7   1    1.40    2.10
 -11  -7  -1   -2.80    1.60
 -11  -7  -1    1.00    1.90
 -11   7  -1    1.10    3.70
 -11   7  -1    2.70    1.30
  11   7   1    3.80    3.00
  11   7   1    5.10    1.80
 -11   7  -1   -0.10    1.70
  11   7   1    3.10    2.20
 -13  -7  -1    6.60    2.50
 -13  -7  -1    8.50    2.80
 -13   7  -1    2.10    2.00
  13   7   1    3.90    1.90
 -13   7  -1    1.40    2.90
  13   7   1    1.40    2.70
 -13   7  -1    4.50    1.30
 -30   0   2    0.20    1.80
 -30   0   2    2.30    2.20
  30   0  -2    0.30    1.80
  30   0  -2    0.00    1.40
 -30   0   2    0.10    1.80
 -28   0   2   88.89    8.20
 -28   0   2   90.09    9.60
  28   0  -2   74.19    8.60
  28   0  -2   73.99   10.90
  26   0  -2   35.00    7.80
 -26   0   2   37.10    7.20
 -26   0   2   41.80    6.00
 -26   0   2   30.80    8.40
  26   0  -2   31.50    3.60
  26   0  -2   31.80    5.70
  26   0  -2   33.60    7.30
  24   0  -2  135.99    9.40
 -24   0   2  149.19   13.70
  24   0  -2  149.49   15.70
 -24   0   2  149.29   11.70
 -24   0   2  132.39   13.70
  24   0  -2  112.69   12.10
  24   0  -2  144.49   10.10
 -24   0   2  104.19   26.50
  24   0  -2  127.59   29.90
  24   0  -2  138.19   12.70
 -22   0   2    4.50    2.30
  22   0  -2    4.80    1.80
  22   0  -2   12.30    4.00
  22   0  -2   12.30    4.90
 -22   0   2    3.10    7.70
 -22   0   2    0.70    3.10
  22   0  -2   -2.00    8.20
  22   0  -2   13.90   11.00
  22   0  -2    2.80    3.80
 -22   0   2    4.80    4.50
 -22   0   2    3.00    2.10
 -20   0   2   24.60    6.70
  20   0  -2   25.80    6.20
 -20   0   2   43.50   12.70
  20   0  -2   57.89   14.30
  18   0  -2   20.00   13.00
  18   0  -2   32.90    9.90
 -18   0   2   53.29    5.50
  18   0  -2   70.69   42.30
 -18   0   2   40.90   11.20
  18   0  -2   34.20    6.30
  18   0  -2   44.10   10.40
 -18   0   2   46.40    4.30
 -18   0   2   42.50    6.70
  16   0  -2   65.19   15.20
 -16   0   2   95.79    7.50
  16   0  -2   93.39    8.20
 -16   0   2   95.69    9.40
 -16   0   2   73.99   10.20
  16   0  -2   98.99    6.50
  16   0  -2   87.09    6.40
  16   0  -2   77.79   17.50
 -16   0   2   78.49    7.90
 -16   0   2  101.79   12.60
  16   0  -2   64.99   35.70
 -16   0   2   77.79    7.50
  16   0  -2   69.89   11.70
  16   0  -2   92.19   11.80
  16   0  -2   75.99    8.70
  14   0  -2    4.20    4.30
  14   0  -2   18.00   16.30
  14   0  -2    9.40    2.30
 -14   0   2   18.20    5.00
  14   0  -2    4.90    4.10
  14   0  -2    5.50    5.30
 -14   0   2   10.30    4.00
 -14   0   2    6.70    4.20
  14   0  -2    9.00    2.90
  12   0  -2   59.99    5.00
  12   0  -2   55.79   24.10
  12   0  -2   60.49    5.60
 -12   0   2   73.99    8.00
  12   0  -2   67.19    7.70
  12   0  -2   53.19    8.90
  12   0  -2   44.70    8.80
 -12   0   2   46.30    9.80
 -12   0   2   76.49    7.70
 -10   0   2  231.98   13.60
 -10   0   2  193.68   19.30
 -10   0   2  215.28   15.30
  10   0  -2  243.48   13.90
  10   0  -2  221.08   17.70
  10   0  -2  282.17   33.00
  10   0  -2  232.78   15.80
 -10   0   2  216.78   18.10
   8   0  -2   19.40   10.10
   8   0  -2    6.90    2.70
  -8   0   2    9.20    2.60
  -8   0   2   11.20    3.90
  -8   0   2    2.80    3.10
   8   0  -2    9.10    3.10
   6   0  -2  669.73   39.90
  -6   0   2  675.83   41.60
   6   0  -2  727.43   38.70
   6   0  -2  752.52   51.69
  -6   0   2  739.03   39.90
  -6   0   2  721.33   38.80
   6   0  -2  736.63   40.60
  -4   0   2  359.76   22.50
  -4   0   2  374.46   21.00
   4   0  -2  381.76   21.70
   4   0  -2  372.26   21.70
   4   0  -2  339.17   21.30
  -4   0   2  378.16   21.20
   4   0  -2  379.66   30.10
   4   0  -2  401.06   20.70
  -2   0   2   11.50    2.30
  -2   0   2    6.80    1.60
  -2   0   2   10.90    2.20
   2   0  -2    8.20    2.00
   2   0  -2   11.70    2.00
   2   0  -2   10.10    4.60
   2   0  -2    9.60    2.00
   2   0  -2   10.80    2.00
   2   0  -2    7.80    1.70
   0   0   2  144.39    9.80
   0   0  -2  181.28    9.80
   0   0   2  132.19   13.80
   0   0   2  163.38   10.30
   0   0  -2  164.78   10.40
   0   0  -2  136.79    9.80
   0   0   2  169.58    9.30
  -2   0  -2  393.76   23.40
   2   0   2  440.06   23.60
  -2   0  -2  353.76   22.50
  -2   0  -2  424.06   22.10
   2   0   2  413.26   22.60
  -2   0  -2  378.26   22.70
   4   0   2   16.00    3.60
   4   0   2   12.30    3.30
  -4   0  -2    9.00    2.70
   4   0   2   16.70    2.80
  -4   0  -2   19.50    2.60
  -4   0  -2    9.80    3.20
   4   0   2   15.70    2.90
   4   0   2   17.80    7.40
  -4   0  -2   12.20    2.60
  -6   0  -2    8.80    3.10
   6   0   2   14.70    3.70
  -6   0  -2   13.70    3.20
  -6   0  -2   17.50    3.00
   6   0   2   16.10    4.10
   6   0   2   -1.80    8.30
   6   0   2   15.10    4.10
   6   0   2   16.30    3.40
   8   0   2   22.30    4.50
  -8   0  -2   18.70    4.60
   8   0   2   25.40    3.30
   8   0   2   23.30    4.80
   8   0   2   10.60   13.20
   8   0   2   28.40    6.40
  -8   0  -2   20.50    3.80
   8   0   2   16.80    5.40
  -8   0  -2   20.40    5.40
  10   0   2  243.68   21.80
  10   0   2  240.78   21.20
  10   0   2  261.47   18.80
 -10   0  -2  249.38   16.50
 -10   0  -2  252.37   19.60
  10   0   2  191.98   33.70
 -10   0  -2  214.48   14.60
  10   0   2  257.57   15.60
  10   0   2  258.17   19.20
  12   0   2   31.10    6.70
 -12   0  -2   23.30    6.60
 -12   0  -2   26.10    4.70
  12   0   2   30.10    9.30
  12   0   2   23.60    6.50
  12   0   2   43.50   24.10
  14   0   2   34.60   33.20
 -14   0  -2   47.90    9.90
  14   0   2   37.70    5.30
  14   0   2   35.00    8.70
 -14   0  -2   35.40    6.60
 -14   0  -2   25.70    5.20
  14   0   2   47.70    8.60
  14   0   2   37.60    4.30
  14   0   2   27.70   13.10
  16   0   2   15.40    5.20
 -16   0  -2   -0.60    5.10
 -16   0  -2   12.80    4.90
 -16   0  -2    2.00    4.70
 -16   0  -2    7.80    4.20
  16   0   2    5.10    4.80
  16   0   2    2.00    7.40
 -16   0  -2   12.00    4.80
  16   0   2   16.00    7.10
 -16   0  -2    3.10    2.40
 -18   0  -2  397.06   23.20
  18   0   2  368.26   26.90
  18   0   2  289.27   37.60
 -18   0  -2  381.06   25.10
  18   0   2  360.16   31.40
  18   0   2  382.26   24.30
  18   0   2  362.96   21.50
 -18   0  -2  388.76   22.30
 -18   0  -2  340.27   25.10
 -18   0  -2  339.27   43.10
  18   0   2  370.06   21.20
  18   0   2  370.16   32.40
 -18   0  -2  338.77   21.00
  18   0   2  284.77  102.39
 -18   0  -2  323.87   19.90
  20   0   2  421.76   28.40
  20   0   2  422.96   27.80
  20   0   2  384.96   24.10
 -20   0  -2  400.96   26.50
 -20   0  -2  462.85   28.80
 -20   0  -2  443.16   25.40
 -20   0  -2  435.16   37.50
  20   0   2  402.56   35.20
 -20   0  -2  430.76   28.40
  20   0   2  369.96   37.00
 -20   0  -2  393.06   39.40
  20   0   2  417.76   24.70
 -22   0  -2   31.50    6.10
  22   0   2   36.60    4.30
  22   0   2   19.00   13.60
  22   0   2   38.70    6.80
 -22   0  -2   28.20    8.70
  22   0   2   25.20    8.80
 -22   0  -2   32.60    4.50
 -22   0  -2   42.00    8.80
  22   0   2   37.80    5.20
 -22   0  -2   35.00   18.10
 -22   0  -2   34.50    6.60
  22   0   2   32.80    8.10
 -24   0  -2    6.00    5.90
 -24   0  -2   11.60    7.50
  24   0   2   13.60    5.30
  24   0   2   10.90    5.80
  24   0   2   17.80    5.70
 -24   0  -2   20.90    5.50
  24   0   2   15.00    5.20
  26   0   2    4.40    2.70
 -26   0  -2    5.50    2.80
  26   0   2    6.70    2.50
 -26   0  -2    6.50    3.60
  26   0   2    4.80    4.10
  28   0   2   26.10    5.70
 -28   0  -2   39.40    6.40
 -28   0  -2   28.60    6.40
  28   0   2   22.20    6.20
 -28   0  -2   14.60    5.70
  30   0   2   -0.70    2.20
 -30   0  -2    3.80    2.70
 -30   0  -2    4.40    2.30
  30   0   2    1.80    1.80
 -30   0  -2    1.50    2.30
 -30   0  -2   -1.60    1.50
  31  -1  -2    2.60    1.60
 -31  -1   2    1.30    2.10
  31  -1  -2    3.90    2.40
 -31  -1   2    3.80    2.20
  31   1  -2    3.80    2.70
 -31   1   2    1.80    2.30
 -31   1   2    3.70    2.20
 -31   1   2    5.40    2.60
  31   1  -2    2.40    2.30
  29  -1  -2    4.90    2.90
 -29  -1   2    5.60    2.70
 -29  -1   2    7.80    2.80
  29  -1  -2   10.00    2.60
  29  -1  -2    7.50    2.70
 -29   1   2    8.20    3.00
 -29   1   2    5.30    2.40
  29   1  -2    4.90    2.80
  29   1  -2    4.20    3.00
 -29   1   2    0.90    3.10
  27  -1  -2    7.80    2.60
  27  -1  -2    8.60    4.30
 -27  -1   2   12.90    4.80
 -27  -1   2   12.90    4.20
  27  -1  -2    8.40    9.00
  27  -1  -2   13.00    2.50
  27  -1  -2    8.50    3.30
 -27   1   2   12.80    4.50
  27   1  -2    9.70    3.80
 -27   1   2   11.60    4.00
 -27   1   2   15.50    5.50
  27   1  -2   12.70    6.40
 -27   1   2    4.60    4.30
  27   1  -2   10.80    5.00
  25  -1  -2   65.79    5.80
  25  -1  -2   50.29    8.90
 -25  -1   2   63.89    8.70
  25  -1  -2   61.99    6.20
 -25  -1   2   57.89    6.50
 -25  -1   2   74.19    7.60
  25  -1  -2   67.49    9.70
 -25   1   2   72.59    9.50
  25   1  -2   66.49    8.80
  25   1  -2   61.59    8.40
  25   1  -2   74.59   11.40
 -25   1   2   68.59    8.20
 -25   1   2   56.09    5.60
 -25   1   2   67.19    9.50
 -23  -1   2  165.78   14.30
  23  -1  -2  151.68   10.90
 -23  -1   2  161.38   12.00
  23  -1  -2  170.38   15.50
  23  -1  -2  150.28   13.60
  23  -1  -2   98.59   34.90
 -23  -1   2  117.09   28.70
  23  -1  -2  139.59   10.10
 -23  -1   2  143.39    9.40
 -23   1   2   84.49   34.20
 -23   1   2  147.29   12.70
 -23   1   2  156.48   14.90
 -23   1   2  166.08   16.10
 -23   1   2  147.39   10.50
  23   1  -2  153.08   13.40
 -23   1   2  112.49   34.50
  23   1  -2  166.48   14.40
  23   1  -2  182.18   18.20
  23   1  -2  126.19   32.40
 -21  -1   2   31.90    3.60
 -21  -1   2   27.90    6.10
  21  -1  -2   34.30    6.20
  21  -1  -2   30.80    3.80
 -21  -1   2   32.00    5.10
  21  -1  -2   32.00    4.50
  21  -1  -2   14.10    7.90
  21  -1  -2   28.30    5.90
 -21  -1   2   25.80    4.60
  21  -1  -2    8.20    9.30
 -21   1   2   42.00    6.20
  21   1  -2   40.60   16.30
 -21   1   2   29.60    4.20
 -21   1   2   37.60    8.30
  21   1  -2   25.30    4.00
  21   1  -2   37.60    8.00
  21   1  -2   40.10    6.70
 -21   1   2   32.90    4.70
 -21   1   2   17.90   11.40
  21   1  -2   30.70    6.30
 -21   1   2   27.50    6.80
  21   1  -2   30.50   10.40
  19  -1  -2   48.90    6.40
 -19  -1   2   19.20    8.50
 -19  -1   2   35.80    6.30
  19  -1  -2   44.00    4.60
 -19  -1   2   64.39   11.40
  19  -1  -2   45.70    4.40
 -19  -1   2   42.40    4.00
  19  -1  -2   47.60   11.00
  19  -1  -2   32.50    6.10
  19  -1  -2   26.20    7.70
 -19  -1   2   41.50    4.20
  19  -1  -2   36.20   12.60
 -19  -1   2   44.90    6.80
 -19   1   2   48.70    4.90
 -19   1   2   47.90    8.40
  19   1  -2   55.39    7.80
  19   1  -2   26.50    8.70
  19   1  -2   31.30    5.80
  19   1  -2   60.79   62.49
 -19   1   2   45.80   13.70
 -19   1   2   35.00    4.30
  19   1  -2   31.40    7.40
  19   1  -2   31.10   13.70
  19   1  -2   34.40    3.90
 -19   1   2   29.40    6.10
  19   1  -2   18.30   10.30
  19   1  -2   37.50    4.30
 -19   1   2   39.40    7.10
  19   1  -2   26.00    6.30
  17  -1  -2    8.70    8.90
 -17  -1   2    7.60    4.10
  17  -1  -2   13.80    2.70
  17  -1  -2   25.80   11.40
  17  -1  -2   13.60    4.00
 -17  -1   2   16.10    3.10
 -17  -1   2   13.20    2.30
  17  -1  -2   17.50    6.50
 -17  -1   2    2.50    6.40
  17  -1  -2    3.20    4.00
 -17   1   2   11.60    3.80
 -17   1   2   13.60    2.90
 -17   1   2    4.30    4.60
  17   1  -2    9.50    2.90
  17   1  -2   10.20    2.70
 -17   1   2    5.20    6.10
  17   1  -2    6.10    4.00
  17   1  -2    7.30    2.40
 -17   1   2    7.80    8.20
  17   1  -2    0.10    7.90
 -17   1   2   18.70    6.00
  17   1  -2   11.30    4.50
  17   1  -2    8.40    4.80
  17   1  -2   12.30    6.30
  17   1  -2  -12.70   22.60
  15  -1  -2  118.89   21.20
  15  -1  -2  104.49   11.40
  15  -1  -2  133.79   16.20
 -15  -1   2  110.39    8.80
  15  -1  -2  117.79    9.10
 -15  -1   2  146.29   15.10
  15  -1  -2  112.59    7.70
 -15  -1   2   96.89   15.40
 -15  -1   2  105.39    7.40
  15  -1  -2  126.59   15.50
 -15   1   2  115.19   15.00
  15   1  -2  116.79   10.40
  15   1  -2  117.79    8.60
  15   1  -2  118.09   12.60
  15   1  -2   90.99   33.90
  15   1  -2  122.29   16.30
  15   1  -2  115.99   17.80
  13  -1  -2   41.00    4.30
 -13  -1   2   21.50    7.30
 -13  -1   2   37.00    5.90
  13  -1  -2   28.40    6.90
  13  -1  -2   42.80    5.90
 -13  -1   2   31.70    3.30
  13   1  -2   19.90    5.80
 -13   1   2   20.80    6.90
  13   1  -2   41.40    8.30
  13   1  -2   25.00    9.60
  13   1  -2   24.00    6.50
  11  -1  -2  285.67   43.30
 -11  -1   2  310.97   20.00
 -11  -1   2  293.07   22.20
  11  -1  -2  290.87   19.00
  11  -1  -2  303.07   22.50
 -11  -1   2  282.07   17.30
  11  -1  -2  266.47   16.80
  11   1  -2  307.87   19.90
  11   1  -2  286.57   22.20
  11   1  -2  298.87   25.90
  11   1  -2  269.47   17.90
  11   1  -2  277.07   37.40
 -11   1   2  323.67   22.30
 -11   1   2  318.27   26.30
  11   1  -2  281.87   22.20
  -9  -1   2  274.67   16.20
   9  -1  -2  257.67   15.70
   9  -1  -2  268.27   19.90
   9  -1  -2  308.37   17.70
   9  -1  -2  220.48   40.70
  -9  -1   2  292.97   18.60
   9   1  -2  268.67   20.00
   9   1  -2  282.27   33.30
  -9   1   2  276.97   22.90
  -9   1   2  284.07   29.90
   9   1  -2  254.57   22.20
  -9   1   2  293.27   19.60
   9   1  -2  289.27   17.90
  -7  -1   2  182.28   13.10
  -7  -1   2  169.48   13.50
   7  -1  -2  222.68   25.30
   7  -1  -2  182.08   12.00
  -7  -1   2  183.08   12.60
   7  -1  -2  178.28   14.10
  -7   1   2  169.68   17.30
  -7   1   2  169.98   12.70
   7   1  -2  192.28   13.80
  -7   1   2  164.48   15.40
   7   1  -2  174.88   11.40
   7   1  -2  183.38   12.70
   7   1  -2  195.48   23.20
  -7   1   2  178.88   16.30
  -7   1   2  117.19   30.70
  -5  -1   2  106.99    8.50
  -5  -1   2  115.99    9.40
   5  -1  -2  114.29    8.40
   5  -1  -2  102.39    7.10
  -5  -1   2  108.99    8.80
   5  -1  -2  112.29   10.20
   5   1  -2  133.49   16.20
  -5   1   2  108.49    7.20
  -5   1   2  109.89    8.10
   5   1  -2  111.59    8.00
   5   1  -2  112.09    6.70
  -5   1   2  108.29   11.60
  -5   1   2  117.99   10.60
   5   1  -2  112.59    9.10
  -5   1   2  109.49   11.80
   5   1  -2  109.79   10.30
   5   1  -2  116.09   10.30
  -3  -1   2  646.94   36.70
   3  -1  -2  640.84   40.00
  -3  -1   2  648.34   38.00
   3  -1  -2  750.52   37.20
  -3  -1   2  646.94   38.40
   3  -1  -2  642.04   35.60
  -3  -1   2  658.73   36.80
  -3   1   2  609.64   41.30
   3   1  -2  740.93   40.20
  -3   1   2  654.73   36.20
   3   1  -2  734.43   40.80
  -3   1   2  694.83   44.60
   3   1  -2  741.63   37.10
  -3   1   2  748.23   40.70
   3   1  -2  582.64   37.00
  -3   1   2  771.92   39.90
   3   1  -2  745.23   45.80
  -3   1   2  711.43   38.60
  -1  -1   2  572.54   30.90
  -1  -1   2  548.25   32.10
   1  -1  -2  560.04   30.20
  -1  -1   2  570.84   29.50
  -1  -1   2  507.55   29.10
   1  -1  -2  539.15   29.30
  -1   1   2  485.05   34.10
   1   1  -2  572.04   34.00
  -1   1   2  570.04   30.20
   1   1  -2  621.34   32.60
  -1   1   2  573.74   32.60
   1   1  -2  490.85   33.10
   1   1  -2  566.14   35.00
  -1   1   2  513.05   32.90
   1   1  -2  597.34   33.90
   1   1  -2  597.14   31.30
  -1  -1  -2  468.85   25.60
   1  -1   2  507.25   27.10
  -1  -1  -2  418.56   24.80
   1  -1   2  484.65   25.20
  -1  -1  -2  479.45   23.10
   1   1   2  364.46   26.90
  -1   1  -2  372.66   27.30
  -1   1  -2  481.55   27.40
   1   1   2  432.56   23.60
  -1   1  -2  369.96   26.80
  -1   1  -2  442.46   28.20
  -1   1  -2  460.95   28.40
   1   1   2  427.06   26.00
   1   1   2  428.16   30.30
   1   1   2  422.26   27.30
   3  -1   2 1173.28   64.39
  -3  -1  -2 1311.17   68.59
   3  -1   2 1400.36   71.09
  -3  -1  -2 1200.68   66.39
   3  -1   2 1312.57   68.39
   3  -1   2 1296.77   65.99
  -3  -1  -2 1280.67   65.59
  -3   1  -2 1161.28   71.99
   3   1   2 1227.88   69.79
  -3   1  -2 1319.97   67.29
   3   1   2 1202.78   67.59
  -3   1  -2 1219.98   70.89
   3   1   2 1213.68   64.89
   3   1   2 1285.57   66.59
  -3   1  -2 1267.77   67.19
   3   1   2 1348.07   76.69
  -5  -1  -2   33.90    5.70
   5  -1   2   31.40    5.60
   5  -1   2   29.50    3.00
  -5  -1  -2   35.30    5.40
  -5  -1  -2   31.70    3.70
  -5  -1  -2   25.90    4.20
   5  -1   2   27.90    6.20
   5  -1   2   30.40    4.00
   5   1   2   31.70    4.10
   5   1   2   44.20    6.40
  -5   1  -2   33.90    4.20
   5   1   2   36.90    4.90
  -5   1  -2   32.60    5.00
  -5   1  -2   44.30   12.20
  -5   1  -2   20.10    5.80
   5   1   2   28.00   11.00
   7  -1   2  164.38   10.70
   7  -1   2  165.78   11.60
  -7  -1  -2  170.48   14.80
   7  -1   2  196.58   20.00
  -7  -1  -2  179.78   11.20
   7  -1   2  193.28   14.60
  -7  -1  -2  184.28   14.90
   7  -1   2  181.88   18.00
  -7  -1  -2  192.78   13.00
   7   1   2  187.78   16.40
  -7   1  -2  154.58   14.90
  -7   1  -2  164.58   15.00
  -7   1  -2  208.28   12.70
   7   1   2  190.88   13.90
   7   1   2  190.48   14.20
  -7   1  -2  179.48   17.70
   7   1   2  195.68   24.80
   9  -1   2  752.12   45.20
   9  -1   2  618.44   64.09
  -9  -1  -2  766.62   45.10
  -9  -1  -2  740.63   40.10
   9  -1   2  759.32   46.70
   9  -1   2  703.73   41.70
   9  -1   2  737.13   40.10
   9  -1   2  748.43   50.89
  -9  -1  -2  784.92   43.40
  -9  -1  -2  711.63   45.50
  -9   1  -2  693.23   46.70
   9   1   2  839.62   66.09
  -9   1  -2  721.53   47.40
   9   1   2  739.13   46.30
   9   1   2  808.02   45.10
   9   1   2  837.12   45.30
 -11  -1  -2  130.89   12.00
  11  -1   2   92.79    8.40
  11  -1   2  122.49    8.60
  11  -1   2   54.89   32.10
  11  -1   2  101.89   16.70
  11  -1   2  119.29   13.50
 -11  -1  -2  106.09    7.20
 -11  -1  -2  126.99    8.50
  11  -1   2  122.59   13.70
 -11  -1  -2  117.19   11.90
  11  -1   2  107.99   10.30
  11   1   2  126.59   13.00
  11   1   2  114.49   13.30
 -11   1  -2  108.99   13.90
  11   1   2  124.09   12.60
  11   1   2   78.49   27.30
  11   1   2   87.59   10.00
 -13  -1  -2  162.08   10.00
  13  -1   2  171.98   11.80
  13  -1   2  324.97   71.49
  13  -1   2  161.78   10.20
  13  -1   2  166.38   18.30
 -13  -1  -2  152.88   11.20
  13  -1   2  127.09   19.30
 -13  -1  -2  178.78   16.10
  13  -1   2  170.78   15.10
  13  -1   2  146.79   16.90
 -13  -1  -2  165.78   15.40
  13   1   2  173.18   17.80
  13   1   2  168.58   12.60
 -13   1  -2  151.78   18.50
  13   1   2  111.09   33.00
  13   1   2  152.08   10.80
  13   1   2  153.48   15.90
  13   1   2  148.69   16.40
  15  -1   2   66.59   11.50
 -15  -1  -2   59.59    4.80
  15  -1   2   57.89    6.60
 -15  -1  -2   51.09    4.50
  15  -1   2   64.09    9.80
 -15  -1  -2   45.00    8.00
  15  -1   2   55.79   14.20
  15  -1   2   65.99    5.50
 -15  -1  -2   61.19   10.50
  15  -1   2   40.80   16.90
 -15  -1  -2   47.30    5.50
 -15  -1  -2   65.49    6.40
  15   1   2   72.19   11.80
  15   1   2   56.09    4.90
  15   1   2  111.19   38.50
  15   1   2   46.20    9.00
 -15   1  -2   44.10    5.10
  15   1   2   56.59   15.40
  15   1   2   56.19    7.60
 -15   1  -2   42.50    6.90
 -15   1  -2   51.79   13.10
  15   1   2   54.59    5.90
  15   1   2   69.39   12.40
 -15   1  -2   34.40   14.80
  15   1   2   75.69    9.00
 -17  -1  -2  197.78   12.40
  17  -1   2  232.98   16.00
 -17  -1  -2  200.68   13.90
 -17  -1  -2  196.68   22.70
 -17  -1  -2  154.98   17.50
 -17  -1  -2  172.88   18.40
 -17  -1  -2  211.18   12.30
  17  -1   2  160.78   34.50
  17  -1   2  201.48   21.00
 -17  -1  -2  207.98   13.80
  17  -1   2  193.48   12.60
  17  -1   2  190.68   21.30
  17  -1   2  216.98   13.30
  17   1   2  131.19   28.70
  17   1   2  216.48   57.79
  17   1   2  195.28   21.80
 -17   1  -2  196.38   29.00
  17   1   2  172.78   18.60
  17   1   2  192.28   16.60
  17   1   2  164.78   25.90
  17   1   2  220.18   17.20
  17   1   2  203.18   12.80
 -17   1  -2  211.68   17.50
 -17   1  -2  191.58   17.30
 -17   1  -2  207.98   13.00
 -17   1  -2  220.78   25.80
 -17   1  -2  226.88   15.60
 -17   1  -2  197.78   13.00
  17   1   2  195.78   13.30
  19  -1   2   35.30   12.50
 -19  -1  -2   48.10    6.30
 -19  -1  -2   25.60    6.30
  19  -1   2   47.00    6.70
 -19  -1  -2   40.90    4.80
 -19  -1  -2   42.70    7.40
 -19  -1  -2   38.40    4.20
  19  -1   2   40.50    4.90
  19   1   2   20.90   14.60
 -19   1  -2   27.10    6.60
 -19   1  -2   28.10    8.10
 -19   1  -2   40.90    8.90
  19   1   2  -43.10   42.10
 -19   1  -2   45.30    5.00
 -19   1  -2   50.69    8.20
 -19   1  -2   43.30    4.80
 -19   1  -2   25.50   16.60
  19   1   2   39.80    4.50
  19   1   2   32.50    8.30
  19   1   2   26.20    8.20
 -21  -1  -2  134.79   13.00
 -21  -1  -2  140.89   10.70
  21  -1   2  111.29   19.80
  21  -1   2  126.39   10.40
  21  -1   2  152.58   13.30
 -21  -1  -2   90.79   21.30
  21  -1   2  127.49   14.60
  21  -1   2  140.79   10.00
 -21  -1  -2  150.08   12.00
 -21  -1  -2  129.09    8.80
  21  -1   2   94.79   24.70
 -21   1  -2  140.79   14.20
 -21   1  -2  147.89   10.30
  21   1   2   92.99   27.50
  21   1   2  133.09   12.40
 -21   1  -2  159.98   14.60
 -21   1  -2  162.58   13.50
  21   1   2  144.59   14.20
  21   1   2  129.69   16.70
  21   1   2  138.09    9.40
  21   1   2   33.90   63.19
 -23  -1  -2   64.19    8.00
 -23  -1  -2   59.19    6.60
  23  -1   2   66.19    6.00
  23  -1   2   36.20   15.20
  23  -1   2   51.99    8.00
 -23  -1  -2   48.50    8.20
  23  -1   2   44.10    8.70
  23  -1   2   61.19    6.30
 -23  -1  -2   64.69   24.60
  23   1   2   73.89   10.00
  23   1   2   47.70    7.80
  23   1   2   55.99    8.80
 -23   1  -2   69.99   10.30
 -23   1  -2   71.69    6.40
  23   1   2   47.10   10.50
 -23   1  -2   35.70   29.70
 -23   1  -2   35.40    9.60
 -23   1  -2   63.29    8.30
 -25  -1  -2   73.09    9.30
 -25  -1  -2   60.49    7.00
  25  -1   2   53.09    9.80
  25  -1   2   69.89    6.00
  25  -1   2   65.59    8.60
  25  -1   2   80.79   10.30
 -25  -1  -2   73.89    8.50
  25  -1   2   61.29    9.90
 -25   1  -2   67.69    8.20
 -25   1  -2   43.80   11.10
 -25   1  -2   68.79    6.30
  25   1   2   51.29   11.10
 -25   1  -2   74.89   10.30
  25   1   2   69.69    9.40
  25   1   2   80.79   15.00
 -27  -1  -2   32.00    5.00
 -27  -1  -2   35.10    5.90
 -27  -1  -2   24.00    6.00
  27  -1   2   39.40    6.40
  27  -1   2   44.20    4.00
  27  -1   2   28.30    5.60
 -27   1  -2   43.40    7.30
  27   1   2   30.10    6.00
 -27   1  -2   24.20    7.40
 -27   1  -2   41.00    6.10
  29  -1   2   17.70    3.60
  29  -1   2   20.60    4.20
  29  -1   2   19.30    5.60
 -29  -1  -2   25.70    8.30
 -29   1  -2   28.60    4.90
  29   1   2   13.30    5.70
 -29   1  -2   12.30    4.60
 -29   1  -2   19.10    5.70
  29   1   2   15.20    3.90
  30  -2  -2   16.90    1.80
  30  -2  -2   13.80    2.90
 -30  -2   2   23.60    3.60
  30   2  -2   11.20    4.00
  30   2  -2   17.60    3.80
 -30   2   2   23.60    5.90
 -30   2   2   14.80    4.00
 -28  -2   2   28.20    6.00
  28  -2  -2   36.90    5.50
  28  -2  -2   44.00    3.80
 -28  -2   2   40.90    5.40
  28  -2  -2   38.00    4.70
 -28  -2   2   37.10    6.50
  28  -2  -2   35.00    6.10
 -28   2   2   38.20    7.90
 -28   2   2   49.70    6.30
  28   2  -2   46.30    7.80
 -28   2   2   41.80    6.60
 -28   2   2   34.50    5.90
  28   2  -2   28.70    6.90
  26  -2  -2   31.30    3.60
  26  -2  -2   25.60    6.80
 -26  -2   2   27.70    4.20
 -26  -2   2   25.70    4.40
  26  -2  -2   22.10    5.90
  26  -2  -2   32.90    4.30
 -26   2   2   27.40    6.80
 -26   2   2   21.40    6.40
  26   2  -2   30.20    5.40
 -26   2   2   17.20    5.40
 -26   2   2   25.70    3.60
  26   2  -2   23.00    7.40
  24  -2  -2  103.59    8.10
 -24  -2   2   98.59    6.80
  24  -2  -2   98.19   10.20
 -24  -2   2   98.69    8.60
 -24  -2   2   72.49   10.40
 -24  -2   2   90.29    9.80
  24  -2  -2   87.49    7.10
  24  -2  -2   83.29   10.80
  24   2  -2   98.59   14.10
 -24   2   2  103.49   12.00
 -24   2   2   89.69    7.30
 -24   2   2   84.99    7.70
 -24   2   2   97.19    9.80
  24   2  -2   83.69    9.90
 -24   2   2  108.79   12.30
 -24   2   2   78.69   14.00
 -22  -2   2   81.09   22.10
 -22  -2   2   63.29    8.60
 -22  -2   2   75.19    7.40
  22  -2  -2   73.79    6.80
  22  -2  -2   68.79    9.20
 -22  -2   2   64.79    6.00
 -22  -2   2   56.19    9.00
  22  -2  -2   69.99    8.70
  22  -2  -2   36.00   16.00
 -22  -2   2   74.79    5.80
  22  -2  -2   39.40   17.40
  22  -2  -2   79.89    6.30
  22   2  -2  -19.30   50.19
  22   2  -2   22.30   41.80
 -22   2   2   62.59    8.60
  22   2  -2   71.99   12.40
 -22   2   2   68.99    6.40
 -22   2   2   82.29   11.50
 -22   2   2   75.39   10.50
  22   2  -2   75.59    9.80
 -22   2   2   78.59   13.90
 -22   2   2   54.19   27.90
  22   2  -2   60.99    9.10
  22   2  -2   66.19    9.70
 -22   2   2   73.89    6.70
 -20  -2   2   21.70    3.20
 -20  -2   2    7.70    5.70
 -20  -2   2   20.30    3.40
 -20  -2   2   21.00    4.00
  20  -2  -2   19.10    3.30
 -20  -2   2   14.10    5.00
 -20  -2   2   25.00    5.40
  20  -2  -2   16.30    4.70
  20  -2  -2   16.70    3.60
  20  -2  -2   11.30    8.10
  20  -2  -2   25.70    5.40
  20  -2  -2   14.50    8.40
  20   2  -2   17.90    7.60
 -20   2   2   19.80    3.80
 -20   2   2   20.70    3.60
 -20   2   2   16.10    5.30
  20   2  -2   15.70    3.10
  20   2  -2   15.90    6.00
 -20   2   2   18.30    6.40
  20   2  -2   14.10    5.20
  20   2  -2   12.60   17.70
 -20   2   2   26.10   17.80
 -20   2   2   18.90    6.40
  20   2  -2   15.50    5.70
  20   2  -2   -9.60   40.60
 -18  -2   2   58.69    6.90
  18  -2  -2   69.49    5.80
  18  -2  -2   93.49   13.50
  18  -2  -2   61.99    5.30
 -18  -2   2   64.99    5.50
 -18  -2   2   66.49    5.20
 -18  -2   2   63.19    7.10
  18  -2  -2   75.69    7.70
 -18  -2   2   68.49    5.90
  18  -2  -2   40.70   13.20
 -18  -2   2   65.49   11.40
 -18  -2   2   33.10   16.30
  18   2  -2   68.19    8.60
 -18   2   2   55.49    9.20
 -18   2   2   54.99    8.90
  18   2  -2   68.19    5.30
  18   2  -2   66.79    9.40
 -18   2   2   39.70   16.90
  18   2  -2   26.00   29.30
  18   2  -2   35.30   16.00
  18   2  -2   52.29    9.20
 -18   2   2   64.09   10.30
 -18   2   2   70.59    6.40
 -18   2   2   67.39    5.80
 -18   2   2  102.89   16.20
  18   2  -2   43.40   10.50
  16  -2  -2   40.70    4.10
 -16  -2   2   39.50    3.80
  16  -2  -2   46.30    5.60
 -16  -2   2   36.10    5.50
 -16  -2   2   48.00    8.50
 -16  -2   2   45.00    5.60
 -16  -2   2   42.00    4.20
  16  -2  -2   47.80    7.80
  16  -2  -2   42.30   12.70
 -16  -2   2   51.79   13.60
  16  -2  -2   72.09   16.30
  16  -2  -2   33.40    4.50
  16   2  -2   42.70    3.90
 -16   2   2   40.90    5.30
 -16   2   2   41.00    7.70
  16   2  -2   37.20    8.10
  16   2  -2   26.50   13.80
 -16   2   2   39.20    8.80
  16   2  -2   49.40    4.20
 -16   2   2   45.30    4.40
  16   2  -2   23.80   23.20
  16   2  -2   26.50   10.20
  16   2  -2   17.00   15.40
 -16   2   2   41.00    8.90
  16   2  -2   24.80    6.90
 -16   2   2   37.80   17.90
  16   2  -2   31.60    7.50
 -16   2   2   29.50    9.80
  16   2  -2   42.50    8.80
 -14  -2   2   14.80    5.80
  14  -2  -2   28.60    5.60
 -14  -2   2   26.80    3.20
 -14  -2   2   21.20    6.00
  14  -2  -2   22.30    2.90
  14  -2  -2   32.90    9.70
  14   2  -2   22.30    3.30
  14   2  -2   13.00   17.00
  14   2  -2   10.30    8.40
  14   2  -2   19.50    3.60
 -14   2   2   13.60    5.30
  14   2  -2   29.00   10.20
  14   2  -2   13.60   11.90
 -14   2   2    6.70    7.80
 -14   2   2   15.40    3.00
  14   2  -2    7.10    5.80
 -14   2   2   36.70   14.20
  14   2  -2   15.60    6.20
 -12  -2   2  665.13   42.10
  12  -2  -2  656.63   35.70
  12  -2  -2  735.33   44.50
 -12  -2   2  733.33   40.60
 -12  -2   2  701.53   36.60
  12  -2  -2  699.33   38.60
  12  -2  -2  618.74   35.80
  12   2  -2  600.64   45.20
  12   2  -2  605.04   62.19
  12   2  -2  601.04   48.30
  12   2  -2  570.24   52.49
 -12   2   2  608.14   53.19
 -12   2   2  604.34   78.69
 -10  -2   2  180.78   14.10
  10  -2  -2  171.18   10.40
 -10  -2   2  169.48   13.80
 -10  -2   2  161.58   11.30
  10  -2  -2  177.78   16.00
 -10  -2   2  157.08   10.00
  10   2  -2  192.98   18.20
 -10   2   2  137.69   36.10
  10   2  -2  156.88   20.20
  10   2  -2  158.38   29.10
  10   2  -2  141.49   21.80
 -10   2   2  150.08   20.60
 -10   2   2  205.28   21.30
   8  -2  -2  887.41   50.99
   8  -2  -2  922.21   46.60
  -8  -2   2  742.53   50.69
  -8  -2   2  889.21   48.20
   8  -2  -2  701.03   42.90
  -8  -2   2  808.72   46.40
  -8   2   2  731.53   56.69
  -8   2   2  906.11   57.19
   8   2  -2  763.62   53.69
   8   2  -2  786.42   57.69
   8   2  -2  852.31   50.89
  -8   2   2  894.41   56.49
  -8   2   2  852.01   64.19
   6  -2  -2  112.39   11.90
  -6  -2   2  114.19   10.50
  -6  -2   2  120.89    9.50
  -6  -2   2   96.79    9.90
   6  -2  -2   91.59    6.90
  -6   2   2  124.29   16.10
   6   2  -2  115.59   15.90
   6   2  -2  110.49   17.70
  -6   2   2   99.79   14.40
   6   2  -2  122.49   15.10
   4  -2  -2   38.90    3.70
   4  -2  -2   33.70    3.70
  -4  -2   2   31.70    5.30
  -4  -2   2   33.80    6.00
   4  -2  -2   49.80    7.90
  -4  -2   2   26.10    4.70
  -4   2   2   35.80   10.10
   4   2  -2   41.10    9.20
  -4   2   2   31.60    7.50
   4   2  -2   40.70   10.30
  -4   2   2   26.40    6.60
   4   2  -2   36.60    9.50
  -2  -2   2  261.87   15.10
   2  -2  -2  270.57   17.20
  -2  -2   2  277.17   18.80
   2  -2  -2  268.57   22.00
  -2  -2   2  279.47   16.90
  -2   2   2  257.37   24.50
  -2   2   2  253.17   21.80
   2   2  -2  294.77   22.80
   2   2  -2  251.97   22.90
  -2   2   2  273.27   22.10
   2   2  -2  246.68   22.80
   2   2  -2  241.58   20.20
   0  -2   2  242.38   17.30
   0  -2   2  261.97   17.80
   0  -2  -2  228.18   14.10
   0  -2  -2  262.67   17.90
   0  -2  -2  255.67   16.00
   0   2   2  268.87   20.70
   0   2  -2  249.88   22.60
   0   2  -2  263.67   14.40
   0   2   2  273.67   24.60
   0   2  -2  211.78   20.90
   0   2  -2  282.57   22.80
   0   2   2  243.98   21.60
   0   2  -2  225.98   14.00
   2  -2   2  219.58   16.10
  -2  -2  -2  241.88   15.70
  -2  -2  -2  261.17   14.70
   2  -2   2  273.77   20.40
   2   2   2  239.98   21.50
   2   2   2  239.38   21.70
   2   2   2  270.17   19.70
  -2   2  -2  230.38   20.80
  -2   2  -2  227.08   21.80
  -2   2  -2  263.17   22.50
   2   2   2  247.48   23.50
   4  -2   2  159.98   15.80
   4  -2   2  147.79   11.00
  -4  -2  -2  145.29    9.90
   4  -2   2  142.99    9.10
  -4  -2  -2  142.29    9.20
   4   2   2  129.09   15.70
   4   2   2  117.49   17.20
  -4   2  -2  159.88   17.30
  -4   2  -2  142.79   16.60
  -4   2  -2  140.79   14.90
  -4   2  -2  141.69   13.70
   4   2   2  127.29   12.10
   4   2   2  158.28   19.10
   6  -2   2  448.46   33.40
  -6  -2  -2  441.06   24.30
   6  -2   2  398.46   24.20
  -6  -2  -2  419.76   32.10
   6  -2   2  429.26   31.10
  -6  -2  -2  461.25   26.10
   6  -2   2  507.35   35.80
  -6   2  -2  489.05   36.70
  -6   2  -2  455.05   35.10
  -6   2  -2  431.66   34.40
  -6   2  -2  424.76   31.60
   6   2   2  484.85   40.90
   6   2   2  434.86   28.80
  -6   2  -2  429.56   31.20
  -8  -2  -2  254.47   17.00
   8  -2   2  247.38   15.20
  -8  -2  -2  283.97   15.20
   8  -2   2  252.17   18.40
  -8  -2  -2  231.38   20.60
   8  -2   2  249.08   25.10
   8  -2   2  248.88   21.80
   8  -2   2  234.68   14.10
  -8   2  -2  231.28   25.70
   8   2   2  236.08   18.90
   8   2   2  265.87   25.30
   8   2   2  252.17   33.20
  -8   2  -2  210.58   23.10
  -8   2  -2  233.88   29.40
 -10  -2  -2  663.73   44.20
 -10  -2  -2  682.83   36.50
 -10  -2  -2  705.43   39.80
  10  -2   2  663.73   45.20
  10  -2   2  613.14   44.20
  10  -2   2  650.23   35.80
  10   2   2  619.84   48.30
 -10   2  -2  671.63   53.39
  10   2   2  695.43   63.89
  12  -2   2   24.50    8.20
 -12  -2  -2   42.50    8.60
  12  -2   2   42.40    9.20
 -12  -2  -2   30.30    6.20
  12   2   2   19.50    7.40
  14  -2   2   11.40    6.20
 -14  -2  -2   24.70    4.30
  14  -2   2   21.40    3.20
 -14  -2  -2   23.60    3.10
  14  -2   2   12.60    5.10
  14  -2   2   15.00    6.60
 -14  -2  -2   28.10    3.90
  14  -2   2   12.60    8.70
 -14  -2  -2   29.20    3.70
 -14  -2  -2   20.50    8.20
  14  -2   2   29.10    4.40
  14   2   2   14.60    8.60
  14   2   2   13.60    5.60
  14   2   2   23.90    3.00
 -14   2  -2   15.10    5.30
 -14   2  -2   19.90    3.40
  14   2   2   22.30    5.80
 -14   2  -2   32.70    8.00
  14   2   2   20.90    7.70
 -14   2  -2    5.30    8.10
 -14   2  -2   23.00    3.10
  14   2   2    3.80   20.30
 -14   2  -2   25.80    6.90
  14   2   2   23.30   10.90
  16  -2   2   22.10    4.80
 -16  -2  -2    8.00    4.60
  16  -2   2   12.20    2.90
 -16  -2  -2   19.40    3.00
  16  -2   2   21.20    8.80
 -16  -2  -2   14.40    3.10
  16  -2   2   19.70    8.60
  16  -2   2   13.40    4.60
  16  -2   2   13.00    3.00
  16  -2   2   27.70   12.40
 -16  -2  -2   18.90    3.80
 -16  -2  -2    9.70    5.50
 -16  -2  -2   16.40    4.00
 -16  -2  -2    8.10    5.20
 -16   2  -2   -2.00    9.10
  16   2   2   13.70    6.80
 -16   2  -2    9.70    4.10
 -16   2  -2   19.70    7.70
  16   2   2   17.10    2.80
  16   2   2   73.69   37.40
  16   2   2   -2.20    9.00
 -16   2  -2   12.20    5.10
  16   2   2   12.20    4.40
 -16   2  -2   17.00    3.20
 -16   2  -2   19.30    3.50
 -16   2  -2   19.00    6.00
  16   2   2   15.10    5.20
  18  -2   2    5.10    3.40
 -18  -2  -2    2.50    2.20
 -18  -2  -2    0.80    1.30
  18  -2   2    4.00    1.90
 -18  -2  -2   -0.10    1.60
 -18  -2  -2   -3.80    5.30
  18  -2   2   11.30    4.60
  18  -2   2    3.60    1.70
 -18  -2  -2   10.10    3.80
 -18  -2  -2    5.50    6.00
  18  -2   2   10.50    7.60
  18  -2   2  -12.00    8.10
 -18   2  -2    7.20    5.70
 -18   2  -2    2.80    2.50
 -18   2  -2    5.80    6.00
  18   2   2    4.00    5.30
  18   2   2   -0.30    6.20
  18   2   2  -39.50   35.70
 -18   2  -2    3.40    5.80
  18   2   2    3.50    3.50
 -18   2  -2    5.10    3.10
  18   2   2   -0.10    3.00
  18   2   2  -23.40   16.10
 -20  -2  -2   18.50    5.40
  20  -2   2   16.30    5.30
  20  -2   2   22.90    5.90
  20  -2   2   20.00    3.40
 -20  -2  -2   18.80    3.50
 -20  -2  -2    8.10    9.00
 -20  -2  -2   -0.20    8.40
  20  -2   2   19.80    9.00
  20  -2   2   24.00    4.20
 -20  -2  -2   16.70    4.70
 -20  -2  -2   16.90    3.70
 -20  -2  -2   19.50    7.30
 -20   2  -2   22.00    3.90
 -20   2  -2   30.70   17.60
  20   2   2    9.20    6.10
  20   2   2   26.20   50.09
 -20   2  -2   39.70    8.30
  20   2   2   19.20    6.30
  20   2   2   11.50    5.20
 -20   2  -2   14.80    6.10
 -20   2  -2   24.70    7.10
 -20   2  -2   21.10    9.20
 -20   2  -2   30.10    4.20
  22  -2   2   11.60    5.10
 -22  -2  -2   21.10    5.50
  22  -2   2   22.90    3.60
 -22  -2  -2   13.50    5.60
  22  -2   2   19.70    6.00
 -22  -2  -2   15.40    3.00
 -22  -2  -2   20.90    4.40
 -22  -2  -2    6.30   13.30
  22  -2   2   19.60    3.80
  22  -2   2   14.70   12.40
 -22   2  -2   13.30    3.60
 -22   2  -2   13.00    5.10
 -22   2  -2   20.30    7.10
 -22   2  -2  -17.60   22.90
  22   2   2   16.00    7.50
 -22   2  -2    8.00    5.90
  22   2   2    7.40    4.20
 -24  -2  -2   61.79    7.50
  24  -2   2   44.60    6.90
  24  -2   2   59.19    5.50
  24  -2   2   32.90    9.70
 -24  -2  -2   53.29    6.00
  24  -2   2   40.20    8.80
  24  -2   2   53.59    6.00
 -24  -2  -2   48.00    8.90
 -24  -2  -2   48.90    4.30
  24   2   2   37.60    7.70
 -24   2  -2   40.00   10.40
 -24   2  -2   54.99    9.50
  24   2   2   40.50    7.40
 -24   2  -2   51.69    5.20
  24   2   2   44.80    9.90
 -24   2  -2   51.49    7.70
 -26  -2  -2   24.00    5.20
  26  -2   2   28.40    7.70
 -26  -2  -2   28.70    4.40
  26  -2   2   17.50    5.90
  26  -2   2   33.20    4.40
  26  -2   2   37.70    3.90
  26  -2   2   25.20    5.10
  26   2   2   18.80    5.40
 -26   2  -2   40.00    7.70
 -26   2  -2   27.50    4.00
  26   2   2   35.40    5.80
  26   2   2   20.90    6.80
 -26   2  -2   18.40    5.10
 -26   2  -2   31.80    6.00
 -26   2  -2   37.10    6.40
 -28  -2  -2    2.90    2.40
  28  -2   2    5.60    1.90
  28  -2   2    5.00    2.00
  28  -2   2    7.20    2.70
 -28  -2  -2    3.80    2.10
 -28   2  -2    3.50    2.60
 -28   2  -2    6.00    3.10
 -28   2  -2    2.30    2.70
  28   2   2    1.40    2.20
 -28   2  -2    4.00    2.80
  28   2   2    4.10    2.80
  28   2   2   10.60    4.00
 -29  -3   2    2.70    1.60
  29  -3  -2    1.60    1.50
  29  -3  -2    6.20    1.60
  29   3  -2    0.00    2.00
 -29   3   2    2.30    2.00
  29   3  -2   -1.70    2.70
 -29   3   2    3.80    2.40
  29   3  -2    5.70    2.70
 -29   3   2    3.90    2.00
  27  -3  -2    3.00    1.40
 -27  -3   2    3.70    2.00
  27  -3  -2    3.00    2.30
  27  -3  -2    2.10    2.90
 -27  -3   2    2.70    1.80
  27  -3  -2    4.90    4.00
  27  -3  -2    2.00    1.50
  27   3  -2    0.70    2.50
 -27   3   2    3.80    2.70
 -27   3   2    2.00    3.10
 -27   3   2    4.00    2.20
 -27   3   2    6.30    3.10
  27   3  -2    2.40    2.60
  27   3  -2    6.90    3.10
 -25  -3   2   38.60    3.80
  25  -3  -2   34.10    6.70
  25  -3  -2   41.60    4.50
  25  -3  -2   24.50    6.00
 -25  -3   2   35.20    4.60
  25  -3  -2   38.30    3.90
 -25  -3   2   25.40    4.70
  25   3  -2   33.70    7.50
 -25   3   2   24.50    7.80
 -25   3   2   32.80    3.90
  25   3  -2   36.60    6.00
 -25   3   2   24.00    7.00
  25   3  -2   28.70    6.90
 -25   3   2   40.80    7.10
 -25   3   2   39.80    6.80
 -23  -3   2   32.40    3.90
 -23  -3   2   17.50    7.30
  23  -3  -2   23.40    5.50
 -23  -3   2   32.40    5.00
 -23  -3   2   40.00    4.80
  23  -3  -2   48.90    7.10
  23  -3  -2   34.70    4.70
  23  -3  -2   35.10    4.10
 -23   3   2   32.80    4.20
 -23   3   2   30.60    6.70
  23   3  -2   24.80    8.40
 -23   3   2   39.50    9.60
 -23   3   2   35.10    4.30
  23   3  -2   19.70    7.10
 -23   3   2   38.60    8.20
  23   3  -2   32.80    6.90
  21  -3  -2   41.90    6.50
  21  -3  -2   60.89   20.70
  21  -3  -2   58.09    5.60
 -21  -3   2   46.90    7.30
 -21  -3   2   30.20    8.00
 -21  -3   2   50.99    5.20
 -21  -3   2   23.50   17.70
  21  -3  -2   47.30    4.90
  21  -3  -2   63.49    7.90
 -21  -3   2   53.19    5.00
 -21  -3   2   48.20    5.80
  21   3  -2  124.19   49.99
 -21   3   2   47.40   12.00
 -21   3   2   15.00   24.60
 -21   3   2   53.49    9.80
  21   3  -2   54.59    8.80
  21   3  -2   38.80    8.30
  21   3  -2   53.69    5.00
 -21   3   2   46.00    5.10
  21   3  -2   50.09   11.10
 -21   3   2   56.59    5.70
 -21   3   2   39.60    9.30
 -19  -3   2   -0.20    6.20
  19  -3  -2    4.90    2.80
  19  -3  -2   16.00    9.30
 -19  -3   2    4.50    2.60
  19  -3  -2    3.40    1.70
 -19  -3   2    2.10    1.50
  19  -3  -2    2.90    1.50
 -19  -3   2   10.90    3.70
  19  -3  -2   -0.80    8.60
 -19  -3   2    7.80    3.10
 -19  -3   2    2.40    2.00
 -19  -3   2   -3.30    7.90
 -19   3   2    4.10    9.20
  19   3  -2    3.50    1.50
 -19   3   2    5.00    2.00
  19   3  -2   -1.20    3.10
  19   3  -2   37.00   23.50
 -19   3   2    2.60    4.80
 -19   3   2    2.40    3.60
  19   3  -2   -2.90    4.50
 -19   3   2    2.20    3.40
 -19   3   2   -1.70   14.40
  19   3  -2   -3.80    4.30
  19   3  -2   10.90   46.80
 -19   3   2    4.30    2.50
 -17  -3   2    8.80    3.10
  17  -3  -2    5.10    2.60
 -17  -3   2   10.70    4.20
 -17  -3   2    6.90    5.90
  17  -3  -2    7.90    2.80
  17  -3  -2    6.00    2.00
 -17  -3   2    0.80    2.90
  17  -3  -2    2.20    6.20
  17  -3  -2    5.20    5.50
 -17  -3   2   -5.20    5.40
  17   3  -2    7.80    5.00
 -17   3   2  -11.20   12.10
  17   3  -2    5.50    5.70
  17   3  -2    9.30    2.10
  17   3  -2    8.20    4.50
 -17   3   2    8.70    5.40
  17   3  -2   -2.60   15.30
 -17   3   2   11.40    3.70
 -17   3   2   -5.80    6.30
 -17   3   2    6.30    5.50
  17   3  -2   50.89   44.60
 -17   3   2   13.70    3.20
 -17   3   2    6.90    6.00
  17   3  -2    3.60    5.40
 -17   3   2    8.00    9.50
 -15  -3   2   26.10    8.20
  15  -3  -2   35.40    3.70
 -15  -3   2   30.90    3.90
 -15  -3   2   37.00    5.50
 -15  -3   2   31.10    3.60
  15  -3  -2   34.90    5.10
 -15  -3   2   26.40   10.50
  15  -3  -2   31.00    7.50
 -15   3   2   31.90    7.90
 -15   3   2   28.30   17.10
  15   3  -2   33.40    3.40
 -15   3   2   34.90    4.10
 -15   3   2  -43.30   46.30
 -15   3   2   42.90    8.30
 -15   3   2   30.80   15.20
  15   3  -2   23.80    8.80
  15   3  -2   18.90    8.10
  15   3  -2   13.20   10.60
 -15   3   2   33.90   10.80
  15   3  -2   35.30    3.70
  15   3  -2   26.30    7.70
 -15   3   2   13.40    8.80
  15   3  -2    1.50   17.40
  15   3  -2   18.40   16.60
  15   3  -2   49.40   26.20
  15   3  -2   25.20    7.10
 -13  -3   2   78.89   14.00
 -13  -3   2   98.79    7.50
  13  -3  -2  113.29    7.80
  13  -3  -2  108.39   17.00
  13  -3  -2  119.89   11.10
  13  -3  -2  116.49    8.90
  13  -3  -2  116.09   27.10
 -13  -3   2  120.99   12.90
 -13  -3   2  123.69    9.70
 -13  -3   2  112.59    7.90
 -13   3   2  105.29   12.40
  13   3  -2  101.99   25.10
  13   3  -2  118.79    7.80
 -13   3   2  110.09   23.90
 -13   3   2  137.29   16.30
 -13   3   2   76.69   34.90
  13   3  -2  121.39    7.80
  13   3  -2  111.79   16.30
  13   3  -2  117.09   12.30
 -13   3   2  109.39    8.00
  13   3  -2  119.99   36.90
  13   3  -2  129.09   14.40
 -13   3   2  118.39   10.50
 -13   3   2   93.39   16.80
 -11  -3   2    7.80    2.40
  11  -3  -2   13.70    4.30
 -11  -3   2   10.80    3.20
  11  -3  -2    1.80    3.60
  11  -3  -2    8.90    2.60
  11  -3  -2   -0.30    7.50
 -11   3   2    0.10    5.30
 -11   3   2   17.80    5.20
 -11   3   2  -10.90   17.10
 -11   3   2   12.40    8.90
 -11   3   2    5.90    5.70
 -11   3   2    6.60    8.80
  11   3  -2   -2.60    9.40
  11   3  -2    4.30   11.10
  11   3  -2    2.20    3.80
  11   3  -2   22.90   12.60
  11   3  -2    0.20    3.50
  11   3  -2    4.90    1.60
   9  -3  -2   87.29   12.80
   9  -3  -2   86.79    9.20
   9  -3  -2   83.09    6.20
  -9  -3   2   89.39    7.10
  -9  -3   2   86.79    9.20
  -9  -3   2  103.29   10.60
   9   3  -2  102.69   22.40
  -9   3   2   98.39   18.10
   9   3  -2   92.49   20.00
  -9   3   2   98.59   18.50
   7  -3  -2   12.60    2.50
  -7  -3   2   15.70    4.20
   7  -3  -2   18.20    7.30
  -7   3   2   10.30    6.60
   7   3  -2   26.90   10.90
   7   3  -2    9.60    9.20
  -7   3   2    9.10    5.30
   7   3  -2    8.70    6.40
  -5  -3   2   39.00    8.50
  -5  -3   2   49.60    6.60
   5  -3  -2   46.10    7.30
  -5  -3   2   36.80    4.20
   5  -3  -2   38.50    4.60
   5  -3  -2   47.70    5.10
  -5  -3   2   43.20    7.70
   5  -3  -2   53.89   10.00
  -5   3   2   43.30    9.00
  -5   3   2   36.10   11.20
   5   3  -2   29.80   13.00
   5   3  -2   42.50   11.80
  -5   3   2   61.89   15.40
  -3  -3   2   86.29   12.00
  -3  -3   2   97.99   11.70
   3  -3  -2  114.69   10.20
  -3  -3   2  115.49   11.30
   3  -3  -2  131.39   17.00
  -3   3   2  104.59   18.50
   3   3  -2  120.19   17.70
  -3   3   2  106.59   14.90
   3   3  -2  107.39    9.30
  -3   3   2   89.69   14.10
   3   3  -2  113.09   15.00
   3   3  -2  109.49   17.80
   1  -3  -2  594.94   36.70
   1  -3  -2  587.74   32.60
  -1  -3   2  612.84   40.50
  -1  -3   2  616.04   35.90
   1  -3  -2  523.15   47.50
  -1  -3   2  584.94   34.00
   1   3  -2  534.75   45.10
   1   3  -2  596.14   43.50
  -1   3   2  576.84   42.50
  -1   3   2  599.04   48.60
  -1   3   2  585.34   43.90
   1   3  -2  551.54   44.10
  -1  -3  -2  156.58   15.50
   1  -3   2  167.18   14.30
  -1  -3  -2  154.88   10.70
   1  -3   2  134.09   14.30
   1  -3   2  127.29   19.90
  -1  -3  -2  143.89   13.00
   1   3   2  168.78   20.20
   1   3   2  170.98   22.70
  -1   3  -2  138.09   20.10
  -1   3  -2  182.08   21.00
   1   3   2  163.28   17.60
  -1   3  -2  170.88   19.70
   3  -3   2  218.78   19.40
   3  -3   2  235.68   21.40
   3  -3   2  225.98   15.10
   3  -3   2  214.78   17.20
  -3  -3  -2  215.38   19.70
  -3  -3  -2  226.68   14.30
   3   3   2  209.18   21.70
  -3   3  -2  208.88   22.70
   3   3   2  202.88   23.60
  -3   3  -2  203.88   24.40
  -3   3  -2  229.38   24.70
   3   3   2  194.68   26.00
   3   3   2  236.18   20.90
   5  -3   2   51.49    9.40
   5  -3   2   48.30   11.30
   5  -3   2   49.20    7.10
  -5  -3  -2   50.89    6.00
   5  -3   2   61.69    5.90
  -5  -3  -2   57.09    4.70
  -5  -3  -2   49.20    9.80
  -5   3  -2   69.29   11.50
  -5   3  -2   51.09   13.20
   5   3   2   57.29   16.10
  -5   3  -2   45.50   13.40
   5   3   2   46.40   13.70
   5   3   2   60.19   14.60
   7  -3   2   89.69    7.60
   7  -3   2  104.99   14.10
  -7  -3  -2  100.19    7.30
  -7  -3  -2   96.79    9.10
   7  -3   2   82.99   16.80
  -7  -3  -2   70.89    7.10
  -7  -3  -2   90.89   13.50
   7  -3   2   85.89    9.80
  -7   3  -2  100.19   18.40
   7   3   2  115.39   21.40
   7   3   2   77.69   16.90
  -7   3  -2  105.09   14.40
   7   3   2  108.19   21.20
  -7   3  -2  104.09   17.70
   9  -3   2    7.50    4.60
   9  -3   2   15.20    5.00
   9  -3   2    6.90    4.40
  -9  -3  -2   15.80    3.30
  -9  -3  -2    9.80    2.40
  -9  -3  -2    4.20    4.30
   9  -3   2   -1.90    6.50
   9  -3   2   11.30    3.10
  -9   3  -2    8.00    8.50
   9   3   2    7.10    6.70
  -9   3  -2   11.80   12.80
   9   3   2   12.80   10.50
  11  -3   2   62.59   11.60
 -11  -3  -2   57.89   11.10
  11  -3   2   53.29   27.10
  11  -3   2   71.09    6.00
 -11  -3  -2   71.69    5.30
  11  -3   2   68.29   12.90
 -11  -3  -2   61.49    8.80
  11  -3   2   63.89    5.30
  11  -3   2   72.59    8.20
 -11  -3  -2   69.09    6.60
 -11   3  -2   68.39   11.50
  11   3   2   50.49   16.70
 -11   3  -2   49.70   17.50
 -11   3  -2   73.59   10.40
 -11   3  -2   57.39    9.30
 -11   3  -2   53.09   21.30
  11   3   2   70.89   11.00
  11   3   2   50.49    8.60
  11   3   2   52.99   21.90
 -11   3  -2   46.10    8.30
  11   3   2   67.39   23.70
 -11   3  -2   73.49    7.00
 -11   3  -2   68.89   18.20
  11   3   2   68.09    4.90
  13  -3   2  115.89   18.00
 -13  -3  -2  125.49   16.60
  13  -3   2   92.39   17.80
 -13  -3  -2  111.09   13.20
  13  -3   2  132.59    9.60
 -13  -3  -2  139.69   11.30
 -13  -3  -2  122.49    8.10
  13  -3   2  100.69   13.00
  13  -3   2  128.19    8.20
 -13  -3  -2   89.29   10.20
 -13  -3  -2  107.09    7.60
  13   3   2   92.69   34.30
  13   3   2   92.39   12.10
 -13   3  -2  111.59   16.30
  13   3   2  109.59   12.00
 -13   3  -2  127.79   13.00
  13   3   2  126.29    7.70
  13   3   2  111.39    7.80
  13   3   2  107.39   15.30
 -13   3  -2   76.09   25.40
 -13   3  -2   82.79   12.30
 -13   3  -2   98.79    7.60
 -13   3  -2  114.09    9.30
  13   3   2  151.38   32.00
 -13   3  -2   97.79   25.20
 -13   3  -2  103.19   11.80
 -13   3  -2   55.69   33.50
  13   3   2   83.19   22.50
  13   3   2  119.39   13.20
 -15  -3  -2   18.00    3.40
 -15  -3  -2   10.40    6.40
 -15  -3  -2   21.00    3.60
  15  -3   2   16.20    3.30
 -15  -3  -2   22.50    3.20
  15  -3   2   26.70   11.10
 -15  -3  -2   11.60    6.40
 -15  -3  -2   22.40    4.50
  15  -3   2   18.60    4.40
 -15   3  -2    9.90    4.80
  15   3   2   18.40    5.70
  15   3   2   20.30   22.10
  15   3   2    3.20   24.50
 -15   3  -2    7.40   10.60
  15   3   2    6.20   13.50
 -15   3  -2   21.00    8.90
 -15   3  -2   45.20   47.10
 -15   3  -2   15.40    3.10
 -15   3  -2   23.60   14.70
 -15   3  -2   13.40    5.20
 -15   3  -2   16.20    4.00
  15   3   2   23.70    8.80
  15   3   2   22.40    3.10
  15   3   2   25.30    7.30
 -17  -3  -2   38.50   14.00
  17  -3   2   60.99    7.20
 -17  -3  -2   55.09    5.50
  17  -3   2   33.70   13.40
 -17  -3  -2   51.99    5.40
  17  -3   2   47.20    5.40
 -17  -3  -2   31.10   12.50
  17  -3   2   48.50    6.30
 -17  -3  -2   51.69    4.90
 -17  -3  -2   49.60    6.50
 -17   3  -2   58.59   10.00
  17   3   2   31.20   21.90
 -17   3  -2   51.89    4.90
 -17   3  -2   44.10    9.40
  17   3   2   56.19    4.90
 -17   3  -2   67.29    8.90
  17   3   2   49.80   32.10
  17   3   2   44.90    8.30
 -17   3  -2   65.99   27.30
  17   3   2   98.89   38.80
 -17   3  -2   45.50   12.30
  17   3   2   54.69    8.60
 -17   3  -2   46.30    8.30
 -17   3  -2   53.19    5.90
 -17   3  -2   47.40   15.90
  17   3   2   55.59   10.80
 -19  -3  -2   29.80    4.30
 -19  -3  -2   28.30    4.00
 -19  -3  -2   11.00    8.70
  19  -3   2   32.10    4.00
  19  -3   2   35.30    4.70
 -19  -3  -2   23.90    4.50
  19  -3   2   34.70    6.40
 -19  -3  -2   30.00    6.00
 -19   3  -2   22.00    4.20
 -19   3  -2   23.80   20.50
  19   3   2   31.70    4.30
 -19   3  -2   24.00    8.60
  19   3   2   25.90   44.60
  19   3   2  -45.90   46.30
 -19   3  -2   14.30    7.40
  19   3   2   24.90    8.90
 -19   3  -2   33.30    7.40
 -19   3  -2   28.10    8.00
 -19   3  -2   31.20    3.90
  19   3   2   25.00    7.70
 -19   3  -2   30.30    8.30
 -19   3  -2   32.80    7.00
  21  -3   2  104.79    8.40
 -21  -3  -2  103.79   12.00
 -21  -3  -2  101.69    9.90
 -21  -3  -2   94.59    7.80
  21  -3   2  101.19    8.50
  21  -3   2  115.39   11.20
  21   3   2  100.79   14.30
 -21   3  -2  100.59    9.70
  21   3   2   77.19   11.90
 -21   3  -2   70.49   18.30
  21   3   2   88.79   17.50
 -21   3  -2   99.79   19.00
 -21   3  -2   81.99    9.70
 -21   3  -2   92.49   19.40
 -21   3  -2  113.99   12.00
 -21   3  -2   76.69   17.50
 -21   3  -2   99.39   12.10
  23  -3   2    4.50    1.90
 -23  -3  -2   10.40    3.60
 -23  -3  -2    9.00    4.90
 -23  -3  -2    2.70    1.30
 -23  -3  -2    8.60    3.50
  23  -3   2    2.90    2.90
  23   3   2    6.50    5.00
  23   3   2    2.90    3.40
  23   3   2    3.40    3.40
 -23   3  -2    7.60    3.70
 -23   3  -2    4.90    3.20
 -23   3  -2    9.30    2.90
 -23   3  -2    7.80    3.60
 -23   3  -2    7.10    3.30
  23   3   2   -0.10    3.40
 -23   3  -2   -0.80    3.00
  25  -3   2   10.00    3.90
  25  -3   2    8.20    3.40
 -25  -3  -2   10.30    2.30
 -25  -3  -2   13.50    3.50
  25   3   2    7.40    4.00
  25   3   2    9.60    3.10
 -25   3  -2   13.40    4.20
 -25   3  -2    5.10    3.70
 -25   3  -2   13.90    2.70
  25   3   2    7.30    3.60
  25   3   2    8.70    4.70
 -25   3  -2   10.60    3.60
 -25   3  -2   18.10    6.00
  27  -3   2    0.60    1.00
 -27  -3  -2   -2.10    1.40
  27  -3   2    0.40    1.30
  27  -3   2    1.00    1.40
 -27  -3  -2   -1.90    1.50
 -27   3  -2    0.10    1.30
 -27   3  -2    1.90    2.10
  27   3   2   -0.70    2.30
 -27   3  -2    1.20    1.90
 -27   3  -2    1.70    2.90
  27   3   2    1.40    2.40
 -27   3  -2    0.50    1.80
  27   3   2    0.20    2.10
 -26  -4   2   15.00    3.30
  26  -4  -2   21.70    3.20
 -26  -4   2   16.20    2.60
  26  -4  -2   20.30    2.90
 -26  -4   2   15.00    2.50
 -26   4   2   14.50    2.10
 -26   4   2   13.00    3.90
  26   4  -2   11.20    4.40
 -26   4   2    7.50    4.00
  26   4  -2   16.20    4.50
  26   4  -2   10.60    4.00
  26   4  -2   19.30    3.90
 -24  -4   2   10.30    3.00
 -24  -4   2    2.60    3.90
  24  -4  -2   10.10    2.30
  24  -4  -2   10.00    3.20
 -24  -4   2    5.70    2.50
 -24  -4   2   10.70    2.70
  24  -4  -2   18.90    5.50
 -24   4   2    4.70    3.30
 -24   4   2    9.10    2.70
  24   4  -2    7.10    4.40
 -24   4   2    7.40    2.40
 -24   4   2    7.50    3.40
  24   4  -2    2.70    4.30
  22  -4  -2    8.20    3.90
 -22  -4   2   15.90    2.90
 -22  -4   2   33.10    9.30
  22  -4  -2   22.00    5.50
  22  -4  -2   13.90    2.80
  22  -4  -2   14.70    3.30
 -22  -4   2   14.10    3.50
 -22  -4   2   11.60    3.00
  22   4  -2   11.40    6.30
 -22   4   2   16.10    6.10
 -22   4   2   15.60    3.00
 -22   4   2   18.30    6.00
 -22   4   2   16.00    6.00
  22   4  -2   12.60    5.10
 -22   4   2   13.60    6.00
  22   4  -2   13.60    2.60
 -22   4   2   11.20    2.80
 -22   4   2    4.60    9.10
  22   4  -2    7.10    3.80
  20  -4  -2    3.30    2.60
  20  -4  -2    3.80    1.60
 -20  -4   2    1.10    1.50
 -20  -4   2    4.90    1.80
 -20  -4   2    3.30    2.40
  20  -4  -2    7.90    2.60
 -20  -4   2    0.40    1.60
  20  -4  -2    0.30    2.30
 -20   4   2    2.60    3.20
 -20   4   2    5.20    5.60
 -20   4   2    6.50    2.50
 -20   4   2    1.10    3.60
  20   4  -2   74.79   65.29
  20   4  -2    3.30    1.50
 -20   4   2    1.60    3.00
 -20   4   2    4.50    2.20
  20   4  -2   -0.10    3.90
  20   4  -2    0.80    4.00
 -20   4   2    3.70    4.30
  20   4  -2    0.70    4.50
 -18  -4   2   19.00    3.50
  18  -4  -2   18.90    5.00
 -18  -4   2   17.30    5.10
  18  -4  -2   51.39   21.30
  18  -4  -2   15.10    3.20
 -18  -4   2    6.90   11.20
 -18  -4   2   21.30    3.60
 -18  -4   2   18.90    3.40
  18  -4  -2   21.00    3.60
 -18   4   2   13.60    5.30
  18   4  -2    8.30    5.40
 -18   4   2   11.30    6.70
  18   4  -2   -6.90   24.00
  18   4  -2    9.80    6.70
 -18   4   2   14.80    5.10
  18   4  -2   16.00    2.80
 -18   4   2   20.10    3.50
  18   4  -2   20.10    6.60
 -18   4   2    0.70   23.30
  18   4  -2    1.50   34.40
 -18   4   2   21.40    4.50
  18   4  -2    8.90    7.10
 -18   4   2   11.40    5.60
 -16  -4   2   22.50   10.40
 -16  -4   2   47.60    5.00
  16  -4  -2   43.30   17.80
  16  -4  -2   56.69    6.50
 -16  -4   2   47.40    6.70
  16  -4  -2   42.50    4.80
 -16  -4   2   37.80   12.60
 -16   4   2   29.10    9.90
 -16   4   2   46.90    4.80
  16   4  -2   29.10    8.30
 -16   4   2   47.80    8.30
  16   4  -2   13.20   18.30
  16   4  -2   46.90    4.40
  16   4  -2   19.60   33.30
  16   4  -2   40.40   10.20
  16   4  -2   55.19    4.50
 -16   4   2   48.10    6.70
  16   4  -2   40.10    8.20
 -16   4   2   33.80   15.40
  16   4  -2   29.00    7.20
 -16   4   2   50.59   11.30
  16   4  -2   41.40   10.40
 -16   4   2   52.29   26.00
 -16   4   2   49.20    9.00
 -14  -4   2   13.60    4.10
 -14  -4   2    5.50    2.60
  14  -4  -2    5.20    1.70
 -14  -4   2    7.80    5.30
 -14  -4   2   10.80    3.10
  14  -4  -2   13.70    4.20
  14  -4  -2   -2.30    9.60
  14  -4  -2   32.00   10.60
  14   4  -2   13.50   25.50
  14   4  -2    4.30    6.20
  14   4  -2    9.00    5.50
 -14   4   2    8.70    3.70
  14   4  -2    8.60    2.20
  14   4  -2   13.10    4.60
  14   4  -2   -2.50   14.80
  14   4  -2   35.20   13.00
 -14   4   2    2.70    6.10
  14   4  -2    7.40    2.20
 -14   4   2    9.30    5.70
 -14   4   2    5.90   12.70
 -14   4   2    7.40    4.80
  14   4  -2    3.70    3.80
 -14   4   2    7.00    2.90
 -14   4   2    3.90    8.50
  12  -4  -2   39.80    8.90
 -12  -4   2   32.60    5.30
  12  -4  -2   34.80    4.40
 -12  -4   2   29.00    3.90
 -12  -4   2   31.10    4.00
  12  -4  -2   23.10    3.90
 -12   4   2   18.70   13.00
  12   4  -2   33.20    7.70
  12   4  -2   31.70   17.50
 -12   4   2   45.50    7.10
 -12   4   2   22.80    7.70
 -12   4   2   30.40    8.40
 -12   4   2   57.69   11.60
  12   4  -2   20.40   20.30
  12   4  -2   38.20    9.40
  12   4  -2   29.10    3.50
 -12   4   2   33.50    4.20
 -12   4   2   24.80   17.50
  12   4  -2   32.20    3.40
 -12   4   2   20.90    8.30
  12   4  -2   -3.10   18.10
  12   4  -2   19.10    8.40
 -12   4   2   25.60    7.20
  12   4  -2   32.60    8.00
 -10  -4   2   39.40    3.80
  10  -4  -2   20.10   11.40
  10  -4  -2   45.20    7.70
  10  -4  -2   36.50    4.20
 -10  -4   2   22.50    7.40
  10   4  -2   35.40    7.40
 -10   4   2   32.90    4.40
  10   4  -2   20.60    7.30
 -10   4   2   40.70    6.80
  10   4  -2   23.10    9.00
 -10   4   2   43.60    9.00
 -10   4   2   56.79   19.10
 -10   4   2   43.40    9.90
 -10   4   2   38.60    9.10
 -10   4   2   44.10   18.50
 -10   4   2   30.00    4.90
 -10   4   2   34.00   12.30
 -10   4   2   27.70    8.10
  10   4  -2   23.80   16.50
  10   4  -2   30.90    7.70
  10   4  -2   21.20   16.30
 -10   4   2   38.60    5.90
  10   4  -2   30.40   17.20
  10   4  -2   34.90    3.80
 -10   4   2   13.30   10.30
  10   4  -2   42.30    4.10
   8  -4  -2   54.99   23.60
   8  -4  -2   42.20   15.40
   8  -4  -2   58.09    5.30
  -8  -4   2   49.30    9.90
  -8  -4   2   69.49    5.40
  -8  -4   2   76.69    6.60
   8  -4  -2   67.99    9.60
   8   4  -2   61.19   10.40
  -8   4   2   43.20   18.80
  -8   4   2   54.29   21.30
  -8   4   2   68.39   19.30
  -8   4   2   65.39    7.50
   8   4  -2   85.59   24.00
  -8   4   2   78.99   11.20
   8   4  -2   64.09    5.80
   8   4  -2   66.79   11.60
  -8   4   2   64.89    6.30
  -8   4   2   82.49   11.50
   8   4  -2   59.79    9.70
  -8   4   2   84.99   21.20
  -8   4   2   68.49    9.10
  -8   4   2   60.49    7.00
   8   4  -2   66.69   20.90
   8   4  -2   65.69   11.60
   8   4  -2   46.40    9.20
   8   4  -2   76.79    9.00
   6  -4  -2   75.39   16.10
   6  -4  -2  112.69   12.50
   6  -4  -2  110.89   21.40
  -6  -4   2   79.39    9.80
  -6  -4   2  109.39    7.80
  -6  -4   2  119.29   12.80
   6   4  -2   89.49    8.00
   6   4  -2  118.99   11.80
  -6   4   2   96.09   14.90
  -6   4   2  108.59   13.00
   6   4  -2  106.49   22.40
  -6   4   2   79.39   15.30
   6   4  -2   81.09   11.20
   6   4  -2  123.59   14.90
   6   4  -2  116.79    9.80
   6   4  -2   87.09   31.20
   6   4  -2  116.39   14.90
  -6   4   2   91.89    8.60
   6   4  -2  103.09   12.70
  -6   4   2   84.69   31.20
  -6   4   2  111.99   10.40
  -6   4   2  106.69   22.00
  -6   4   2  134.99   21.90
   4  -4  -2  121.69   13.40
   4  -4  -2  116.69   10.60
  -4  -4   2  100.79   11.10
  -4  -4   2  109.89   12.80
  -4  -4   2   99.99    8.10
   4  -4  -2  115.49    9.70
   4  -4  -2  110.29   17.40
  -4   4   2  125.99   20.80
   4   4  -2   99.99    8.60
   4   4  -2  118.39   11.10
   4   4  -2   91.49   21.90
   4   4  -2  119.99   11.50
  -4   4   2   91.19    9.10
  -4   4   2  125.79   18.20
  -4   4   2  119.69   11.60
  -4   4   2  111.69   23.30
  -4   4   2  115.69   11.40
  -4   4   2   98.89   21.80
  -4   4   2  102.49   10.00
   4   4  -2  100.29   26.90
   4   4  -2  125.19   12.20
  -2  -4   2   40.60    8.20
   2  -4  -2   37.60    8.40
  -2  -4   2   36.80   14.40
  -2  -4   2   39.00    8.90
   2  -4  -2   37.30   12.30
   2  -4  -2   42.70    7.90
   2   4  -2   63.69   16.10
  -2   4   2   23.90   10.70
  -2   4   2   65.29   13.70
   2   4  -2   52.79   13.20
  -2   4   2   71.79   19.60
   2   4  -2   29.20   15.40
   0  -4   2   15.70    5.50
   0  -4   2   18.80    6.30
   0  -4  -2   44.90   14.40
   0  -4  -2   15.10    6.30
   0  -4  -2   19.10    6.90
   0  -4   2   25.40    8.20
   0  -4   2   19.60    8.00
   0  -4   2   26.80    9.60
   0  -4  -2   18.40    4.20
   0   4  -2   15.10   11.70
   0   4   2   15.20    5.10
   0   4  -2   34.60   12.90
   0   4   2   18.60   10.80
   0   4   2   25.40    5.80
   0   4  -2   26.80   11.20
   0   4   2   10.10    7.80
   0   4  -2   21.30    6.00
   0   4  -2   22.60    5.50
   0   4   2   37.50   11.00
  -2  -4  -2  206.58   20.80
   2  -4   2  172.98   18.90
   2  -4   2  209.38   21.80
   2  -4   2  203.98   18.40
   2  -4   2  190.68   22.40
  -2  -4  -2  196.58   12.30
   2  -4   2  193.18   16.30
  -2  -4  -2  194.88   13.70
   2   4   2  197.28   15.90
  -2   4  -2  239.48   30.00
   2   4   2  200.68   26.30
  -2   4  -2  205.28   17.00
  -2   4  -2  204.18   28.60
   2   4   2  209.78   16.40
  -2   4  -2  203.08   16.50
  -2   4  -2  209.68   17.80
  -2   4  -2  223.88   27.80
   2   4   2  224.58   17.90
   2   4   2  216.58   23.30
   2   4   2  247.98   33.80
  -2   4  -2  251.17   28.20
   4  -4   2   59.99   13.00
  -4  -4  -2   77.29    6.10
   4  -4   2   82.29    9.00
   4  -4   2   48.20   15.50
  -4  -4  -2   74.29    8.20
   4  -4   2   67.39   12.40
  -4  -4  -2   63.39   12.00
  -4   4  -2  103.69   17.50
  -4   4  -2   74.29   18.60
  -4   4  -2   71.09   10.10
   4   4   2   88.59    9.20
   4   4   2   85.99    9.00
   4   4   2   83.39   11.80
  -4   4  -2   74.49   10.50
  -4   4  -2   78.09    8.00
  -4   4  -2   64.89   17.70
  -4   4  -2   72.79   17.40
   4   4   2   69.29   18.30
  -4   4  -2   57.29    8.70
   4   4   2   82.39    9.30
  -6  -4  -2   19.20    3.40
   6  -4   2    4.10    5.80
  -6  -4  -2   12.50    3.20
   6  -4   2   -3.70    7.40
  -6  -4  -2    5.40    4.60
  -6   4  -2    4.40    3.10
   6   4   2   10.50    4.80
   6   4   2    6.90    8.60
  -6   4  -2    4.40    8.20
   6   4   2   23.60   11.90
   6   4   2   12.90    2.50
   6   4   2    9.60    4.90
  -6   4  -2   13.10    4.90
  -6   4  -2   21.30    6.40
  -6   4  -2    4.90    7.10
  -6   4  -2    8.80    3.70
  -6   4  -2   13.60    4.10
   6   4   2   10.30    5.00
   6   4   2   10.10    5.10
  -6   4  -2    5.40    9.10
   8  -4   2   11.40    6.30
   8  -4   2    9.40    5.90
  -8  -4  -2    3.10    3.40
   8  -4   2   13.10    2.90
  -8  -4  -2   12.70    3.60
  -8  -4  -2    0.90    3.80
  -8  -4  -2   10.10    2.80
   8   4   2    5.50    2.00
  -8   4  -2    1.50    6.70
  -8   4  -2    1.80    7.70
  -8   4  -2    3.60    3.20
  -8   4  -2    8.30    3.30
   8   4   2   14.00    5.80
   8   4   2   30.60   16.40
   8   4   2    8.30    4.80
   8   4   2    0.40    6.50
   8   4   2    4.30    8.40
   8   4   2    2.40    4.50
   8   4   2   21.70   13.40
   8   4   2   16.70    5.40
  -8   4  -2   -1.50    7.40
   8   4   2    6.60    3.80
  -8   4  -2    8.90    3.70
  -8   4  -2    5.80    4.20
  -8   4  -2   -2.00    4.90
 -10  -4  -2   48.60   11.90
 -10  -4  -2   25.80    8.50
 -10  -4  -2   26.10    5.50
  10  -4   2   33.80   13.30
 -10  -4  -2   36.00    5.30
  10  -4   2   46.70    5.00
 -10  -4  -2   36.30    4.00
  10   4   2   32.20    7.80
 -10   4  -2   56.49   16.70
  10   4   2   30.50    9.30
  10   4   2   44.40    9.10
 -10   4  -2   40.40    9.30
 -10   4  -2   34.10    6.00
 -10   4  -2   35.50    7.10
 -10   4  -2   31.30    9.10
  10   4   2   23.20   16.20
 -10   4  -2   60.49   22.00
 -10   4  -2   33.60    7.60
  10   4   2   43.90    8.50
 -10   4  -2   38.10    5.10
  10   4   2   41.40    9.00
  10   4   2   17.90   11.00
 -10   4  -2   25.50    8.60
 -10   4  -2   38.70    4.00
 -10   4  -2   41.60    7.40
  10   4   2   19.80   18.20
 -10   4  -2   27.50   11.90
 -12  -4  -2   31.40    4.40
 -12  -4  -2   48.80    4.80
  12  -4   2   33.80    4.30
 -12  -4  -2   39.30   14.60
  12  -4   2   42.40    5.40
 -12  -4  -2   44.30    4.20
  12  -4   2   33.10   13.10
 -12  -4  -2   47.30    5.90
 -12   4  -2   27.70    9.80
 -12   4  -2   32.30   14.50
 -12   4  -2   30.80   12.90
 -12   4  -2   25.70    6.20
  12   4   2   36.20    4.30
 -12   4  -2   37.40    6.80
  12   4   2   65.89   28.00
  12   4   2   24.30    8.60
 -12   4  -2   48.40    4.30
  12   4   2   46.00    4.10
 -12   4  -2   50.69    7.90
  12   4   2   21.40   19.80
 -12   4  -2   45.00    9.50
  12   4   2  -20.10   30.70
  12   4   2   68.29   15.60
 -12   4  -2   39.70    7.10
  12   4   2   44.70    9.60
 -12   4  -2   56.79    9.20
  12   4   2   61.69   13.30
 -14  -4  -2   24.10    4.20
 -14  -4  -2   28.60    3.50
 -14  -4  -2   21.70    9.00
 -14  -4  -2   20.40    5.00
 -14  -4  -2   14.20    8.80
 -14  -4  -2   24.70    4.20
  14  -4   2   28.90    5.30
  14  -4   2   36.40   14.80
  14  -4   2   22.90    3.90
 -14   4  -2   26.40    3.50
  14   4   2   29.00    7.80
  14   4   2    6.50   24.50
  14   4   2    6.20   26.00
 -14   4  -2   24.10    5.90
 -14   4  -2   24.20    9.20
 -14   4  -2   25.30    7.20
 -14   4  -2   31.80   10.60
  14   4   2   21.70   17.50
  14   4   2   28.30    8.70
 -14   4  -2   21.00   15.50
  14   4   2   14.90    7.40
 -14   4  -2   27.80    4.70
 -14   4  -2   15.50    5.90
  14   4   2   24.50    8.80
 -14   4  -2   10.70    9.30
 -14   4  -2   28.30    8.10
  14   4   2   32.90    3.40
  16  -4   2    8.20    3.10
 -16  -4  -2    9.00    3.50
  16  -4   2    0.50    2.50
 -16  -4  -2   11.00    3.10
 -16  -4  -2    3.10    2.30
  16  -4   2    4.90    9.30
 -16  -4  -2   12.20    3.60
 -16  -4  -2   14.30   12.50
 -16  -4  -2    3.10    6.30
  16   4   2   12.00    2.70
  16   4   2   -2.90   27.60
  16   4   2    0.80    4.90
 -16   4  -2    8.60    4.10
 -16   4  -2   12.00    3.60
 -16   4  -2    5.20    3.40
 -16   4  -2    8.60    5.60
  16   4   2  -15.50   23.40
 -16   4  -2    4.20    8.40
 -16   4  -2   13.70    5.00
 -16   4  -2    6.40    2.10
  16   4   2    5.00    5.00
 -16   4  -2    7.60   21.70
  16   4   2   -0.40    4.20
 -16   4  -2    4.40    4.50
 -16   4  -2    5.90    4.70
  16   4   2    5.50    5.50
  18  -4   2    2.00    1.80
 -18  -4  -2    5.20    2.50
  18  -4   2    4.80    2.10
 -18  -4  -2    3.10    1.90
 -18  -4  -2    1.60    1.60
  18  -4   2    2.50    2.70
 -18   4  -2    4.40    2.20
 -18   4  -2    1.70    4.80
 -18   4  -2    9.70    3.90
  18   4   2    3.20    1.70
  18   4   2   25.00   42.00
 -18   4  -2   -1.20    5.90
 -18   4  -2    8.80    4.50
  18   4   2    7.90    5.10
  18   4   2    2.80    5.70
  18   4   2    0.00    3.40
 -18   4  -2   -1.90    2.90
 -18   4  -2    0.60    4.30
  18   4   2    3.70    5.10
 -18   4  -2    5.20    4.60
  20  -4   2   12.80    3.40
 -20  -4  -2   10.30    3.30
 -20  -4  -2    9.40    2.90
  20  -4   2    9.80    3.60
 -20  -4  -2    8.10    2.50
 -20   4  -2    7.70    4.90
 -20   4  -2   10.40    3.60
 -20   4  -2    5.50    7.40
 -20   4  -2    4.10    3.80
  20   4   2    8.30    4.20
 -20   4  -2    8.90    3.00
  20   4   2   11.70    2.80
  20   4   2    5.40    4.80
  20   4   2   11.40    4.40
 -20   4  -2    5.40    4.10
  20   4   2    4.80    4.00
 -20   4  -2    5.50    1.60
 -20   4  -2    6.10    4.20
 -22  -4  -2    3.90    1.80
 -22  -4  -2    2.20    3.00
  22  -4   2    8.10    3.00
  22  -4   2    2.50    3.00
 -22  -4  -2    3.00    1.60
  22  -4   2    2.60    2.00
 -22  -4  -2    2.60    4.40
 -22   4  -2    2.90    2.50
 -22   4  -2    0.60    4.20
  22   4   2    3.30    2.50
 -22   4  -2    6.40    3.40
 -22   4  -2   -1.20    2.90
 -22   4  -2    2.50    1.50
  22   4   2    6.80    3.70
  22   4   2    4.80    3.50
  22   4   2    1.30    3.30
 -24  -4  -2   12.20    3.70
  24  -4   2   21.90    3.10
 -24  -4  -2   21.60    2.60
  24  -4   2   18.20    3.50
 -24  -4  -2   22.00    3.50
 -24  -4  -2   16.00    3.90
  24  -4   2   16.00    6.50
  24   4   2   16.50    5.40
 -24   4  -2   21.60    5.10
 -24   4  -2   12.60    5.50
 -24   4  -2   20.20    3.00
 -24   4  -2   19.40    4.80
  24   4   2   18.30    4.50
  24   4   2   15.90    4.20
  24   4   2   15.70    4.90
  26  -4   2    3.10    1.50
  26  -4   2    2.00    2.00
 -26  -4  -2    0.90    1.40
  26  -4   2    1.30    1.20
  26   4   2    2.00    2.00
  26   4   2    0.20    1.70
 -26   4  -2    1.30    1.90
 -26   4  -2    1.90    1.40
  26   4   2    0.60    2.10
 -26   4  -2    0.20    1.40
 -26   4  -2   -1.00    1.90
  23  -5  -2   39.20    4.10
 -23  -5   2   40.90    4.00
 -23  -5   2   46.90    4.50
 -23  -5   2   52.29    3.90
  23  -5  -2   42.00    4.60
  23   5  -2   29.00    6.30
 -23   5   2   45.60    4.10
  23   5  -2   35.70    6.50
  23   5  -2   51.79    5.80
 -23   5   2   40.90    3.60
  21  -5  -2   -0.60    1.10
 -21  -5   2   -0.70    1.30
 -21  -5   2    3.60    2.80
  21  -5  -2    0.20    2.70
 -21  -5   2    2.00    1.70
 -21  -5   2    1.50    1.90
  21  -5  -2    1.80    1.50
 -21   5   2    0.20    2.60
  21   5  -2   -3.80    2.80
 -21   5   2   -0.40    3.60
  21   5  -2   -1.50    2.50
  21   5  -2    0.40    1.50
 -21   5   2    0.30    1.00
  21   5  -2   -3.50    2.20
  21   5  -2   -0.80    4.10
 -21   5   2    1.40    3.40
  19  -5  -2   23.30    3.30
  19  -5  -2   13.80    5.40
 -19  -5   2   21.10    3.50
 -19  -5   2   22.90    3.10
 -19  -5   2   25.20    7.00
  19  -5  -2   18.30    3.20
 -19  -5   2   20.00    3.60
 -19   5   2   15.60    6.80
 -19   5   2   12.10    5.80
  19   5  -2   20.90    6.30
 -19   5   2   20.70    8.00
  19   5  -2   20.00    6.70
 -19   5   2   19.20    2.90
 -19   5   2   15.00    3.50
  19   5  -2   16.20    5.80
 -19   5   2    8.70    7.30
  19   5  -2   17.40    2.60
  19   5  -2   21.70    5.60
 -17  -5   2    0.90    1.20
  17  -5  -2    1.90    2.40
 -17  -5   2   -0.80    1.50
 -17  -5   2    0.50    2.30
 -17  -5   2    0.30    1.30
  17  -5  -2    1.10    1.50
  17  -5  -2    2.20    1.70
 -17   5   2   -1.20    3.30
  17   5  -2   -0.80    3.30
  17   5  -2    0.60    3.00
  17   5  -2    1.70    1.30
 -17   5   2    3.50    3.40
 -17   5   2    2.60    1.80
 -17   5   2   -4.00    4.80
  17   5  -2   -1.50    3.60
  17   5  -2    3.60    3.30
 -17   5   2    3.00    1.60
 -17   5   2    0.90    4.20
  17   5  -2    5.20    3.90
  15  -5  -2   36.50    4.20
 -15  -5   2   27.50    3.60
 -15  -5   2   27.20    5.20
  15  -5  -2   30.40    5.20
 -15  -5   2   25.20    3.80
 -15  -5   2   37.60    4.30
  15   5  -2   30.30   10.10
 -15   5   2   30.60   16.50
  15   5  -2   22.60    6.80
 -15   5   2   34.20    5.20
 -15   5   2   37.90   10.80
  15   5  -2   31.60    3.30
  15   5  -2   25.80    9.20
 -15   5   2   28.30    7.60
 -15   5   2   26.80    8.70
  15   5  -2   24.60    7.00
 -13  -5   2   30.90   10.80
 -13  -5   2   17.80   13.40
  13  -5  -2   26.10    4.20
 -13  -5   2   35.30    9.90
  13  -5  -2   22.40   14.70
 -13  -5   2   33.40    4.60
  13   5  -2   33.10    7.60
  13   5  -2   15.90    8.00
 -13   5   2   38.60    4.60
 -13   5   2   28.00   15.50
  13   5  -2   33.90    3.50
 -13   5   2   25.50    9.30
  13   5  -2   34.00    8.00
  13   5  -2   32.50    8.30
  13   5  -2   26.50   22.90
 -13   5   2   30.70   23.30
  13   5  -2   33.90    3.70
  13   5  -2   28.20    8.90
 -13   5   2   23.30    8.10
 -13   5   2   24.50    8.20
 -13   5   2   37.40    6.50
 -11  -5   2  375.86   23.20
 -11  -5   2  341.27   20.60
  11  -5  -2  365.56   21.90
 -11  -5   2  356.26   21.00
 -11  -5   2  292.07   27.50
 -11   5   2  371.96   22.80
 -11   5   2  376.06   31.30
  11   5  -2  371.66   28.00
 -11   5   2  332.47   24.80
  11   5  -2  403.86   26.00
  11   5  -2  363.06   20.60
  11   5  -2  397.16   27.60
  11   5  -2  358.96   30.90
 -11   5   2  380.56   48.80
  11   5  -2  391.26   51.19
 -11   5   2  362.56   21.70
 -11   5   2  402.06   25.40
  11   5  -2  370.66   27.10
 -11   5   2  344.17   27.50
  11   5  -2  410.06   30.30
 -11   5   2  328.67   52.79
  11   5  -2  401.06   21.30
   9  -5  -2  140.29    9.50
   9  -5  -2  141.49   22.30
  -9  -5   2  136.39   11.00
  -9   5   2  147.19   11.70
  -9   5   2  145.89   32.40
   9   5  -2  119.99   16.80
   9   5  -2  138.29   15.60
  -9   5   2  136.69   12.80
  -9   5   2  131.59   13.20
  -9   5   2  147.59   30.40
   9   5  -2  143.79    9.80
   9   5  -2  148.89   13.00
   9   5  -2  136.19   13.90
  -9   5   2  139.39   12.10
  -9   5   2  147.69   10.80
  -9   5   2  138.09   16.20
   9   5  -2  166.08   15.10
   9   5  -2  117.99   45.60
  -9   5   2  133.29   29.70
   9   5  -2  132.59    9.30
   9   5  -2  138.09   36.00
   9   5  -2  143.79   15.60
   7  -5  -2   71.79    6.10
   7  -5  -2   49.90   12.20
  -7  -5   2   71.09    7.10
  -7  -5   2   70.79    6.00
  -7  -5   2   65.69   12.50
  -7   5   2   77.49   22.00
  -7   5   2   51.89   23.00
   7   5  -2   72.59   10.90
   7   5  -2   62.49   11.40
   7   5  -2   77.39   11.80
  -7   5   2   69.29    9.30
  -7   5   2   68.09    9.50
   7   5  -2   76.59   25.80
  -7   5   2   55.59   24.30
  -7   5   2   84.39    8.30
  -7   5   2   76.69    8.70
   7   5  -2   78.79    6.50
   7   5  -2   71.39   29.00
  -7   5   2   68.39   10.90
  -7   5   2   77.89    7.40
   7   5  -2   80.99   10.10
  -5  -5   2    3.30    2.20
   5  -5  -2   -3.10    5.80
  -5  -5   2   -8.40    6.80
  -5   5   2    4.20    4.40
   5   5  -2   11.60    6.80
  -5   5   2   -4.50    9.50
   5   5  -2   -8.10   12.70
  -5   5   2    1.30   13.10
   5   5  -2   10.60   15.80
  -5   5   2    5.10    3.20
  -5   5   2   11.70    4.40
   5   5  -2    4.80    2.30
   5   5  -2    6.30    6.80
   5   5  -2    9.00    2.70
  -5   5   2  -25.30   16.20
  -5   5   2    5.20    7.60
   3  -5  -2   16.70    5.40
  -3  -5   2   17.50    6.70
  -3   5   2   29.80    7.50
   3   5  -2   24.60    4.10
  -3   5   2   27.60    5.10
   3   5  -2   22.00   14.40
   3   5  -2   30.20    5.80
  -3   5   2   21.90    6.60
  -3   5   2   42.50   18.60
  -3   5   2   36.40    6.20
   3   5  -2   30.30    4.40
   3   5  -2   36.10    6.60
   3   5  -2   19.80    8.00
  -3   5   2   22.70    6.30
   3   5  -2   21.90   11.40
   3   5  -2   26.10   12.50
  -3   5   2   47.20   16.60
  -3   5   2   31.30   14.50
  -3   5   2   35.40   19.60
  -3   5   2   29.30    6.60
   3   5  -2   38.60    6.90
   3   5  -2   26.90    7.80
   1  -5  -2    5.00    7.00
  -1  -5   2   12.10    6.10
  -1  -5   2    2.00    8.30
   1  -5  -2   14.90    4.00
  -1   5   2   15.20    4.50
   1   5  -2   18.90    4.30
   1   5  -2   23.00    5.90
  -1   5   2   30.70    6.30
  -1   5   2   20.40   12.50
   1   5  -2   28.80   14.60
   1   5  -2   23.20    6.80
   1   5  -2   15.70   11.10
  -1   5   2   15.20    5.10
  -1   5   2    1.90   10.00
  -1   5   2   12.80   10.40
  -1   5   2   14.20    5.30
   1   5  -2   22.60   11.30
  -1   5   2   16.70    5.00
   1   5  -2   30.60    6.60
  -1   5   2   24.90    6.10
   1   5  -2   12.70    4.20
  -1   5   2   28.60   12.30
   1   5  -2   20.00    5.60
   1  -5   2   28.10    9.00
  -1  -5  -2   27.70    4.20
  -1  -5  -2   14.70    9.90
   1  -5   2   12.60    8.90
   1   5   2   26.20    5.60
   1   5   2   14.50    4.30
   1   5   2   22.10    3.90
  -1   5  -2   22.50    6.20
   1   5   2   22.80   12.40
  -1   5  -2   14.20    9.80
   1   5   2   22.60   14.90
  -1   5  -2   28.60    6.50
  -1   5  -2   29.70    4.70
   1   5   2   19.50    7.10
  -1   5  -2   26.80   15.00
   1   5   2   23.00    5.70
  -1   5  -2   18.10    6.30
  -1   5  -2    9.60    8.10
  -1   5  -2   32.50    4.80
   1   5   2   20.20    6.90
  -1   5  -2   25.60    5.90
  -3  -5  -2   34.80    6.20
   3  -5   2   41.00   16.40
  -3  -5  -2   25.50    9.80
   3   5   2   32.80   13.60
  -3   5  -2   41.00   17.70
  -3   5  -2   49.20    8.80
   3   5   2   29.80    8.40
   3   5   2   19.80   12.10
   3   5   2   37.30    6.70
   3   5   2   27.20    8.30
  -3   5  -2   42.70    6.30
   3   5   2   41.70    9.00
  -3   5  -2   36.20    7.00
  -3   5  -2   25.70   12.60
  -3   5  -2   42.20    8.00
   3   5   2   46.80    8.30
   3   5   2   25.60   17.00
   3   5   2   36.40    8.00
  -3   5  -2   49.60   19.10
  -3   5  -2   37.00   15.10
  -3   5  -2   41.10    5.50
   3   5   2   49.60    6.80
  -3   5  -2   38.20    6.10
   3   5   2   32.50    4.10
  -3   5  -2   51.39    6.10
  -5  -5  -2   58.29    6.10
  -5  -5  -2   41.90    5.40
   5  -5   2   65.49   16.90
  -5  -5  -2   47.90   14.70
   5  -5   2   31.90   16.30
  -5   5  -2   62.59   17.70
   5   5   2   55.39    4.70
  -5   5  -2   77.19   23.20
   5   5   2   39.90   22.10
  -5   5  -2   61.79    7.70
   5   5   2   51.89    9.60
   5   5   2   31.00   14.80
  -5   5  -2   64.79   24.00
   5   5   2   51.09    9.80
   5   5   2   49.60    9.80
  -5   5  -2   53.49    6.00
   5   5   2   66.49    9.10
   5   5   2   72.99   28.70
  -5   5  -2   57.49    7.30
  -5   5  -2   60.29   10.20
  -5   5  -2   65.19    9.20
  -5   5  -2   56.79    7.40
  -7  -5  -2  154.98   22.90
  -7  -5  -2  187.78   13.00
  -7  -5  -2  189.48   11.40
  -7   5  -2  181.88   14.50
   7   5   2  187.98   16.70
   7   5   2  177.48   15.30
   7   5   2  151.48   18.40
  -7   5  -2  153.98   33.70
  -7   5  -2  175.58   13.80
   7   5   2  190.38   15.30
   7   5   2  183.68   11.20
   7   5   2  178.88   16.00
   7   5   2  182.58   30.30
   7   5   2  172.88   23.00
  -7   5  -2  209.18   16.10
  -7   5  -2  178.28   15.00
  -7   5  -2  178.88   13.40
  -7   5  -2  171.68   14.70
   7   5   2  142.89   16.60
  -7   5  -2  198.08   19.60
  -7   5  -2  186.08   31.80
   7   5   2  102.49   33.90
  -9  -5  -2  157.08   24.10
  -9  -5  -2  211.98   14.90
  -9  -5  -2  160.98   13.70
   9  -5   2  171.38   12.50
  -9  -5  -2  195.38   14.00
  -9   5  -2  198.58   31.00
   9   5   2  175.38   46.50
   9   5   2  216.48   16.80
   9   5   2  181.78   11.30
  -9   5  -2  169.18   13.80
  -9   5  -2  165.38   14.00
   9   5   2  152.68   16.60
  -9   5  -2  174.38   15.20
   9   5   2  180.68   20.10
   9   5   2  191.28   17.30
  -9   5  -2  186.08   11.70
   9   5   2  177.48   15.40
  -9   5  -2  190.38   14.60
  -9   5  -2  105.89   33.00
  -9   5  -2  215.48   13.90
   9   5   2  191.98   33.80
   9   5   2  199.48   16.50
  -9   5  -2  179.28   20.10
 -11  -5  -2  143.99    9.50
 -11  -5  -2  132.89    9.20
  11  -5   2   84.59   21.90
  11  -5   2  137.79   10.80
 -11  -5  -2  127.39   11.00
 -11   5  -2  138.79   27.00
 -11   5  -2  144.49   10.90
 -11   5  -2  114.49   10.80
  11   5   2  130.09    8.60
 -11   5  -2  139.29   12.90
 -11   5  -2  107.59   11.70
  11   5   2   93.69   35.90
  11   5   2  119.99   14.00
  11   5   2  148.99   13.90
  11   5   2  127.69   12.50
 -11   5  -2  130.49    8.90
  11   5   2  154.58   14.60
 -11   5  -2  139.39   17.50
  11   5   2  112.09   16.80
  13  -5   2   15.60    5.20
  13  -5   2   -4.50   14.30
 -13  -5  -2   16.70    3.80
 -13  -5  -2   14.00    3.40
 -13  -5  -2   22.50    4.70
 -13  -5  -2   13.30    8.70
 -13   5  -2    5.60    9.10
 -13   5  -2   18.50   24.40
  13   5   2   37.90   33.30
 -13   5  -2   20.30    4.00
  13   5   2   27.10    6.60
  13   5   2   19.80    7.20
 -13   5  -2    8.40    5.60
  13   5   2   17.20    2.80
  13   5   2   19.00    6.70
 -13   5  -2   17.60    3.30
  13   5   2    9.70    5.60
 -13   5  -2   20.00    6.00
  13   5   2  -44.50   63.39
 -13   5  -2    5.20    4.50
  15  -5   2    4.90    2.10
 -15  -5  -2    5.40    2.80
  15  -5   2    2.80    3.00
 -15   5  -2    7.20    3.90
 -15   5  -2    4.20    6.20
  15   5   2    8.50    2.20
 -15   5  -2   10.20    3.50
  15   5   2    0.10    4.50
 -15   5  -2   10.30    2.60
 -15   5  -2   -1.20    3.70
 -15   5  -2   -0.40    3.40
  15   5   2    9.90    4.40
 -15   5  -2    3.60    3.80
  15   5   2    5.80    3.90
  15   5   2    3.00    3.80
  15   5   2   -0.50    4.70
  17  -5   2    7.40    3.20
 -17  -5  -2    3.60    1.80
  17  -5   2    1.30    1.90
  17  -5   2    9.80    2.80
 -17  -5  -2   -0.60    2.20
  17   5   2    0.00    2.40
 -17   5  -2    4.60    3.80
  17   5   2    4.00    1.40
 -17   5  -2    4.60    3.50
 -17   5  -2    4.90    3.90
  17   5   2    3.80    3.80
 -17   5  -2    3.40    1.40
  17   5   2   -0.80    3.50
 -17   5  -2    2.00    1.60
  17   5   2   -0.70    2.40
  19  -5   2    8.20    3.50
  19  -5   2    6.70    2.10
 -19  -5  -2    5.20    2.60
 -19  -5  -2    4.50    1.70
 -19  -5  -2    9.40    2.60
 -19   5  -2    6.40    4.60
  19   5   2   13.20    4.80
  19   5   2    4.70    4.20
 -19   5  -2   15.10    5.30
 -19   5  -2   11.30    2.40
  19   5   2   12.70    2.40
 -19   5  -2    8.50    5.50
  19   5   2    7.00    3.60
  19   5   2   13.70    4.90
 -19   5  -2    9.30    2.60
 -21  -5  -2   36.90    6.40
  21  -5   2   29.80    3.90
  21  -5   2   30.00   10.30
 -21  -5  -2   28.30    4.10
  21  -5   2   29.50    3.70
 -21  -5  -2   39.20    3.70
  21   5   2   33.50    5.30
 -21   5  -2   36.40    5.90
  21   5   2   30.40    6.00
 -21   5  -2   27.20    6.40
  21   5   2   33.90    5.50
 -21   5  -2   36.60    3.70
 -23  -5  -2    4.00    1.70
 -23  -5  -2    7.70    1.80
 -23  -5  -2    4.90    1.70
  23   5   2    9.30    3.30
 -23   5  -2    6.50    1.80
 -23   5  -2    6.80    2.30
  23   5   2    4.80    2.50
 -23   5  -2    4.80    3.00
  23   5   2    2.20    2.40
 -20  -6   2    2.10    1.10
 -20  -6   2    0.90    1.10
 -20   6   2    0.40    1.80
 -20   6   2    0.30    0.80
 -20   6   2    0.80    0.90
  20   6  -2    3.60    2.40
  18  -6  -2   12.30    4.40
 -18  -6   2    1.80    1.50
 -18  -6   2    2.20    1.30
 -18  -6   2    2.00    2.60
  18   6  -2    1.00    1.00
  18   6  -2    1.90    2.30
 -18   6   2    0.10    2.40
  18   6  -2   -1.60    2.10
 -18   6   2   -0.20    3.10
  18   6  -2    1.20    2.00
 -18   6   2    2.70    1.40
 -18   6   2   -0.50    1.40
  16  -6  -2   -1.60    3.30
 -16  -6   2    8.40    2.90
  16   6  -2    4.60    4.70
 -16   6   2    5.00    4.10
 -16   6   2    7.90    2.10
 -16   6   2    8.50    2.70
  16   6  -2    7.40    1.80
  16   6  -2   -0.30    3.30
  16   6  -2   10.50    4.50
  16   6  -2    1.00    6.60
  16   6  -2   14.80    4.40
 -14  -6   2   -0.50    1.30
 -14  -6   2   -0.10    2.10
  14  -6  -2   -2.10    2.10
  14   6  -2    3.60    3.20
 -14   6   2    0.60    1.60
  14   6  -2    2.20    3.80
  14   6  -2    1.20    3.60
  14   6  -2    3.00    5.80
 -14   6   2    2.00    5.50
 -14   6   2    6.20    2.40
  14   6  -2    1.90    1.10
 -14   6   2    5.10    4.00
 -12  -6   2   57.09    4.90
 -12  -6   2   51.49    5.00
 -12  -6   2   52.49    6.80
  12   6  -2   55.89    8.80
  12   6  -2   69.19    8.50
 -12   6   2   56.79   17.40
  12   6  -2   55.59    4.60
  12   6  -2   52.69    7.90
 -12   6   2   65.49    5.30
  12   6  -2   58.59    4.50
  12   6  -2   60.99    8.50
 -12   6   2   57.59    6.70
 -12   6   2   52.69   10.20
 -10  -6   2   75.99    7.20
  10  -6  -2   60.99   10.80
  10   6  -2   70.89    5.60
 -10   6   2   71.99   19.80
  10   6  -2   74.99   10.20
 -10   6   2   83.69    6.40
  10   6  -2   78.49    8.90
  10   6  -2   68.09    5.20
 -10   6   2   77.49    8.20
  10   6  -2   83.99    9.50
  10   6  -2   76.79   10.70
 -10   6   2   74.59   11.20
  -8  -6   2   78.69    6.70
  -8  -6   2   77.69    7.60
   8   6  -2   78.19    6.10
   8   6  -2   82.19   10.40
  -8   6   2   78.09    9.10
  -8   6   2   82.19    8.20
  -8   6   2   85.49   20.80
   8   6  -2   69.39    5.60
  -8   6   2   66.29   10.70
   8   6  -2   66.69    8.80
   8   6  -2   71.79   11.30
  -8   6   2   78.89    6.80
  -6  -6   2   16.70    3.20
  -6  -6   2   17.90    4.10
  -6   6   2   17.60   13.30
  -6   6   2   19.10    4.60
   6   6  -2   25.00    7.80
  -6   6   2   22.90    5.80
  -6   6   2   20.40    6.90
   6   6  -2   19.50    6.20
  -6   6   2   17.70    4.70
  -6   6   2   24.50    7.50
   6   6  -2   13.10    5.60
   6   6  -2   26.50    5.40
   6   6  -2   23.90    3.70
  -4  -6   2   36.10    6.20
  -4   6   2   40.40    6.60
   4   6  -2   16.10   36.60
  -4   6   2   38.60    7.50
  -4   6   2   38.00    5.50
  -4   6   2   45.10    6.60
   4   6  -2   37.20    9.40
   4   6  -2   31.10    4.40
   4   6  -2   22.00   16.00
   4   6  -2   35.90    6.30
  -4   6   2   21.00    7.30
   4   6  -2   44.80    7.60
   4   6  -2   36.20    4.50
  -4   6   2   22.60   22.30
  -4   6   2   45.00   14.80
  -2   6   2   23.20    5.00
  -2   6   2   43.00   23.00
   2   6  -2   19.60    4.20
   2   6  -2   26.40    5.70
   2   6  -2   24.00   11.00
   2   6  -2   33.70    7.90
  -2   6   2   27.30    7.60
   2   6  -2   33.60    6.60
  -2   6   2   38.20    6.90
  -2   6   2   29.90    6.20
  -2   6   2    6.80   10.70
   2   6  -2   23.40   22.30
   2   6  -2   21.80    5.30
   2   6  -2   29.70    4.40
  -2   6   2   12.70    9.80
   2   6  -2   15.20   15.80
  -2   6   2   24.50    5.90
   0  -6  -2   23.20    5.20
   0  -6  -2   12.60    8.30
   0   6   2   29.30    6.70
   0   6  -2   27.10    4.60
   0   6  -2   20.90   10.10
   0   6   2   32.00   21.20
   0   6   2   32.70    5.40
   0   6  -2   29.20    5.30
   0   6   2   29.60    7.70
   0   6  -2   42.40   24.30
   0   6  -2    4.20   13.00
   0   6  -2   33.60    4.90
   0   6  -2   37.90    6.10
   0   6  -2   33.70    8.10
   0   6  -2   24.10    5.60
   0   6   2   23.70    5.60
   0   6   2   29.80    7.80
   0   6   2   35.50   13.20
  -2  -6  -2    5.80    6.10
   2   6   2    7.30    1.90
  -2   6  -2    5.50    3.30
  -2   6  -2    8.80    2.80
  -2   6  -2    8.30   18.60
  -2   6  -2    8.10    4.00
  -2   6  -2    0.00    6.30
  -2   6  -2   15.90    4.10
   2   6   2   15.50   13.50
  -2   6  -2   -3.20   13.60
  -2   6  -2   17.30    4.40
  -2   6  -2    3.40    2.60
   2   6   2    0.10    4.80
   2   6   2   11.80    4.80
   2   6   2   -3.10   20.50
   2   6   2    3.90    7.10
  -2   6  -2   10.70    4.60
   2   6   2    3.70    4.00
  -4  -6  -2   17.20    6.70
  -4  -6  -2   10.10    6.00
  -4  -6  -2   13.70    5.30
   4   6   2   27.80    7.10
   4   6   2   31.20   10.50
  -4   6  -2   20.20    5.70
   4   6   2   21.60    3.30
  -4   6  -2   -4.40   14.00
  -4   6  -2   25.50   18.00
  -4   6  -2   13.10    4.90
  -4   6  -2   23.50    6.20
  -4   6  -2   32.00    6.40
  -4   6  -2   35.50    6.30
  -4   6  -2   27.90    5.30
  -4   6  -2   22.20   12.10
   4   6   2   19.40    7.20
  -4   6  -2   22.70    4.80
   4   6   2   11.40   11.50
   4   6   2   18.40   25.90
   4   6   2   21.80   34.10
   4   6   2   24.90    5.90
  -6  -6  -2   14.30    5.00
  -6  -6  -2   32.60    5.10
   6   6   2   24.80    7.80
  -6   6  -2   17.50    6.60
  -6   6  -2   25.80    8.40
  -6   6  -2   23.10    3.40
  -6   6  -2   17.20   11.70
  -6   6  -2   25.20    5.60
   6   6   2   17.00    2.80
  -6   6  -2   20.80    4.70
  -6   6  -2   22.00    5.50
  -8  -6  -2   63.19    7.60
  -8  -6  -2   76.09    7.00
  -8   6  -2   70.49    5.70
   8   6   2   87.69   10.60
  -8   6  -2   67.09    7.00
   8   6   2   74.79    5.30
   8   6   2   87.09    9.70
  -8   6  -2   66.39    7.40
  -8   6  -2   67.29    8.30
   8   6   2   65.59   11.30
  -8   6  -2   85.09    7.60
  -8   6  -2   48.60   17.60
  -8   6  -2   77.79   11.90
  -8   6  -2   66.39    8.00
 -10  -6  -2  129.39   10.80
 -10  -6  -2  110.69    8.70
  10   6   2  123.89   13.20
 -10   6  -2  127.19   11.10
  10   6   2  136.49   11.40
  10   6   2  112.99    7.70
  10   6   2  136.39   12.40
 -10   6  -2   84.79   20.00
 -10   6  -2  115.49    9.20
 -10   6  -2  132.49   15.60
 -10   6  -2  111.69    7.70
  10   6   2  113.19   14.70
 -12  -6  -2   37.10    4.60
 -12  -6  -2   20.40    5.50
 -12   6  -2   27.80    4.30
  12   6   2   45.40    7.20
  12   6   2   32.60    7.20
  12   6   2   31.60    3.20
  12   6   2   35.50    6.30
 -12   6  -2   36.30    3.80
 -12   6  -2   24.90    6.10
 -12   6  -2   20.80    7.40
 -14  -6  -2   36.80   14.50
 -14  -6  -2   42.10    4.70
 -14  -6  -2   28.30    5.90
  14   6   2   45.10    6.80
 -14   6  -2   35.70    4.30
  14   6   2   27.70    9.00
 -14   6  -2   36.50    7.50
  14   6   2   41.80    3.60
 -14   6  -2   38.50    8.20
  14   6   2   36.20    7.20
 -14   6  -2   36.20    3.60
 -16  -6  -2   11.90    4.40
 -16  -6  -2    6.70    2.70
 -16  -6  -2    6.50    2.40
  16   6   2    2.90    2.50
  16   6   2    9.30    4.30
 -16   6  -2    3.20    1.50
 -16   6  -2    6.10    2.80
 -16   6  -2    6.80    3.20
 -16   6  -2    0.80    3.20
  16   6   2    1.20    3.50
 -16   6  -2   -2.30    3.20
  16   6   2    3.40    1.40
 -18  -6  -2    2.00    1.30
 -18  -6  -2    1.50    1.40
 -18  -6  -2   -1.20    1.30
 -18   6  -2   -2.20    1.90
  18   6   2    1.60    2.80
  18   6   2   -0.40    3.10
 -18   6  -2   -0.30    1.10
  18   6   2    0.90    2.20
 -18   6  -2    1.30    2.10
 -20  -6  -2   13.70    2.10
 -20  -6  -2   15.80    3.10
 -20  -6  -2    9.60    2.20
 -20   6  -2   10.40    1.60
 -20   6  -2    9.80    3.30
  20   6   2   12.90    2.70
  20   6   2    8.50    3.00
  20   6   2    9.00    2.90
  15   7  -2    1.50    0.80
 -15   7   2    2.60    2.70
 -15   7   2    1.70    0.80
  15   7  -2    1.20    1.70
 -15   7   2   -0.70    1.70
 -13  -7   2    7.40    1.90
 -13  -7   2    7.70    2.60
  13   7  -2    5.80    2.10
 -13   7   2   11.20    1.60
  13   7  -2   10.30    3.10
 -13   7   2    6.50    2.70
  13   7  -2    9.40    1.40
 -13   7   2    9.60    1.90
 -11  -7   2    6.60    3.10
 -11  -7   2   21.80    4.70
  11   7  -2   12.70    1.80
  11   7  -2   11.10    3.50
  11   7  -2    9.40    3.40
 -11   7   2    8.00    2.20
 -11   7   2    2.70    4.30
 -11   7   2   11.80    3.30
 -11   7   2   11.00    1.90
  -9  -7   2    1.80    2.40
  -9   7   2    4.00    5.20
   9   7  -2    5.80    3.20
   9   7  -2    2.50    1.00
  -9   7   2    2.40    1.70
  -9   7   2    2.30    2.20
  -9   7   2    4.40    1.60
   9   7  -2   -0.60    2.50
   7   7  -2    4.90    3.70
  -7   7   2    5.70    2.90
   7   7  -2    7.30    1.60
  -7   7   2   -0.90    4.80
  -7   7   2    5.40    2.20
   7   7  -2    9.10    4.60
  -5   7   2   11.90    3.40
   5   7  -2    2.00    3.00
  -5   7   2   13.20    3.90
   5   7  -2    9.00    3.30
  -5   7   2    8.40    2.70
  -5   7   2    7.00    3.40
  -5   7   2    7.40    6.60
   5   7  -2    7.00    3.40
   5   7  -2    8.40    2.00
   3   7  -2    4.70    1.90
  -3   7   2    3.20    5.60
  -3   7   2    4.30    2.40
   3   7  -2    8.00    4.20
  -3   7   2    3.20    2.70
  -3   7   2    6.40    2.50
   3   7  -2    4.40    2.90
  -1   7   2    4.80    3.00
   1   7  -2    9.50    3.20
  -1   7   2    9.90    3.80
  -1   7   2    5.60    2.80
  -1   7   2   -0.20    4.50
  -1   7   2    7.90    3.00
   1   7  -2    4.80    3.50
   1   7   2    4.70    2.90
  -1   7  -2    5.30    2.50
  -1   7  -2    3.00    2.60
   1   7   2    7.20    3.00
   1   7   2    3.20    3.10
  -1   7  -2    5.50    1.50
   1   7   2    1.40    4.20
   1   7   2    4.40    2.20
  -1   7  -2    7.10    2.90
  -3   7  -2   17.30    2.90
  -3   7  -2   20.90    3.90
  -3   7  -2   18.90    4.80
   3   7   2   22.10    4.90
   3   7   2   19.30    4.50
   3   7   2   19.70    5.20
  -3   7  -2    9.90    7.20
  -3   7  -2   22.50    4.90
  -3   7  -2   14.30    5.00
  -5   7  -2   16.60    3.70
  -5   7  -2   16.10    4.40
  -5   7  -2   17.80    4.90
  -5   7  -2   26.20    5.00
  -5   7  -2   10.40    6.80
   5   7   2   17.00    4.80
   5   7   2   23.60    5.30
   5   7   2   16.10    4.30
   5   7   2   25.10    6.20
  -5   7  -2   25.50    3.80
  -7  -7  -2   14.40    5.00
  -7   7  -2   15.80    5.20
  -7   7  -2   23.20    6.00
  -7   7  -2   14.60    3.10
   7   7   2   16.20    3.10
   7   7   2   22.00    4.70
  -7   7  -2    7.50    6.90
   7   7   2   24.30    4.70
   7   7   2   30.30    6.30
  -9  -7  -2    1.60    2.60
  -9  -7  -2    4.90    2.00
  -9   7  -2    0.00    3.40
  -9   7  -2    8.30    2.50
   9   7   2    2.70    1.60
   9   7   2    6.10    3.60
  -9   7  -2    2.80    2.70
   9   7   2    2.70    2.10
 -11  -7  -2   16.20    3.60
 -11   7  -2   10.20    2.00
  11   7   2   18.40    4.40
 -11   7  -2   11.40    3.60
  11   7   2   18.00    3.70
 -11   7  -2    4.60    5.00
 -13  -7  -2   -0.40    1.70
  13   7   2    2.30    1.70
  13   7   2    1.70    2.10
 -13   7  -2    3.80    2.10
 -13   7  -2    2.70    1.20
  30   0  -3    4.70    2.40
 -30   0   3    1.70    2.80
 -30   0   3    7.30    2.90
  30   0  -3    6.30    3.60
 -28   0   3    4.10    4.50
  28   0  -3   -0.10    1.90
  28   0  -3    1.10    1.90
 -28   0   3   -0.10    2.10
 -28   0   3    1.10    1.90
 -26   0   3   32.30    7.90
  26   0  -3   33.20    6.70
 -26   0   3   27.50    6.90
 -26   0   3   21.70    5.10
  26   0  -3   31.00    7.10
  26   0  -3   29.80    3.40
  24   0  -3    6.00    4.20
  24   0  -3   16.40    6.40
 -24   0   3   10.70    4.60
  24   0  -3    2.70   11.90
  24   0  -3   10.50    6.40
  24   0  -3   12.70    2.70
 -24   0   3    5.60    4.80
 -24   0   3   12.00    4.30
  24   0  -3    8.60    3.70
 -24   0   3   -1.10   12.60
  24   0  -3   11.60    3.90
 -22   0   3  116.29    9.40
 -22   0   3   82.89    7.80
  22   0  -3   70.39   17.90
  22   0  -3   61.29   19.80
  22   0  -3  102.39   11.10
 -22   0   3  108.49   11.30
  22   0  -3  111.09   10.50
 -22   0   3  108.59   12.30
  22   0  -3   97.09   10.90
 -22   0   3   91.29   21.10
  22   0  -3   90.39   11.50
  22   0  -3  105.69    7.50
  20   0  -3   24.90    5.30
 -20   0   3   32.80    4.60
 -20   0   3   24.40    6.20
 -20   0   3   24.40    4.20
  20   0  -3   32.10    6.00
  20   0  -3   29.40    3.60
  20   0  -3   31.10    4.10
  18   0  -3    8.00    4.50
  18   0  -3    9.40    5.60
 -18   0   3    4.10    1.70
  18   0  -3    1.50   35.80
  18   0  -3    6.90    2.50
 -18   0   3    9.60    4.50
  18   0  -3    1.80    3.40
 -18   0   3   -1.80    2.90
 -18   0   3    2.00    2.00
  18   0  -3    4.20    2.70
 -18   0   3   11.90    4.50
  16   0  -3   -0.10    1.90
  16   0  -3    8.30    2.20
  16   0  -3   -0.30    5.70
  16   0  -3    3.30    3.70
 -16   0   3   -0.70    2.10
 -16   0   3    1.80    3.40
  16   0  -3    1.80    3.90
 -16   0   3    4.40    2.40
 -16   0   3   -0.20    2.60
 -16   0   3    0.90    1.50
  16   0  -3   30.70   31.30
  16   0  -3    8.80    3.40
  16   0  -3   -0.90    4.20
  14   0  -3   41.40   25.20
 -14   0   3   18.20    5.00
 -14   0   3   19.00    7.30
  14   0  -3   10.40    5.40
  12   0  -3  242.58   20.50
 -12   0   3  246.58   21.00
  12   0  -3  214.18   14.00
 -12   0   3  248.58   15.00
 -12   0   3  255.37   17.50
  12   0  -3  261.07   15.40
  12   0  -3  260.17   17.80
  12   0  -3  248.78   37.70
  10   0  -3    4.00    2.00
 -10   0   3    2.90    1.90
 -10   0   3    2.90    1.60
  10   0  -3   -8.10   11.90
 -10   0   3    2.40    1.50
  10   0  -3    3.10    1.90
  10   0  -3    7.60    2.20
   8   0  -3  140.59    9.70
   8   0  -3  106.79    7.70
  -8   0   3  121.79   10.50
   8   0  -3  120.59   10.90
  -8   0   3  122.79    9.30
   8   0  -3  137.49   11.20
  -8   0   3  105.79   12.10
   8   0  -3  136.29   21.50
   6   0  -3  120.29   19.30
   6   0  -3  111.79    9.20
   6   0  -3  113.79    9.70
  -6   0   3  114.79    8.50
   6   0  -3  105.19    9.20
  -6   0   3  103.79   10.60
   6   0  -3  130.89    8.50
  -6   0   3  121.99    9.20
   4   0  -3 2353.16  114.49
  -4   0   3 2202.68  115.09
   4   0  -3 2233.68  115.79
  -4   0   3 2276.87  117.39
   4   0  -3 2383.36  117.59
   4   0  -3 1971.90  125.79
   4   0  -3 2116.59  114.89
  -4   0   3 2195.08  115.09
   4   0  -3 2280.37  116.49
   2   0  -3  543.15   30.00
  -2   0   3  473.05   30.20
   2   0  -3  536.05   37.70
   2   0  -3  542.15   30.70
  -2   0   3  547.95   29.80
  -2   0   3  513.95   30.60
   2   0  -3  535.45   29.60
   2   0  -3  547.65   28.70
   2   0  -3  542.45   28.80
   0   0   3  484.25   28.60
   0   0  -3  502.95   28.80
   0   0   3  438.76   27.80
   0   0   3  488.65   28.20
   0   0  -3  520.25   26.80
   0   0  -3  540.65   27.70
   2   0   3 1866.01  100.49
  -2   0  -3 2014.70   99.89
  -2   0  -3 1910.11  101.79
   2   0   3 1846.52  109.49
   2   0   3 2053.29  101.89
  -2   0  -3 1892.81   98.79
  -2   0  -3 1906.11   99.59
  -4   0  -3  246.38   17.20
   4   0   3  279.47   18.50
  -4   0  -3  263.17   18.80
  -4   0  -3  256.27   15.10
  -4   0  -3  223.28   16.40
   4   0   3  273.67   26.70
   4   0   3  280.47   17.30
  -4   0  -3  268.27   16.00
  -6   0  -3 1016.90   55.09
   6   0   3 1040.80   72.09
  -6   0  -3 1026.20   57.69
   6   0   3 1090.09   57.39
   6   0   3  919.61   55.79
   6   0   3 1131.19   59.49
  -6   0  -3 1029.80   59.99
  -6   0  -3  929.31   55.99
   8   0   3   10.50    3.90
   8   0   3    7.60   10.30
  -8   0  -3    6.10    3.10
  -8   0  -3    1.50    1.70
   8   0   3    5.50    3.30
  -8   0  -3    5.20    2.00
   8   0   3    3.00    2.70
   8   0   3    3.90    1.70
 -10   0  -3  567.34   40.30
 -10   0  -3  563.74   34.90
  10   0   3  664.73   36.30
  10   0   3  646.84   60.59
  10   0   3  702.83   44.70
 -10   0  -3  691.33   42.50
  10   0   3  686.23   41.20
 -10   0  -3  688.33   37.90
  10   0   3  637.44   40.20
  12   0   3  492.65   37.30
  12   0   3  521.85   34.70
 -12   0  -3  457.55   27.80
 -12   0  -3  491.15   30.10
  12   0   3  438.66   33.00
 -12   0  -3  482.15   35.50
  12   0   3  547.65   29.40
  12   0   3  437.06   53.89
  12   0   3  493.75   29.30
  14   0   3   72.19   11.10
 -14   0  -3   70.69    7.60
  14   0   3   69.79    7.40
 -14   0  -3   66.99    8.80
  14   0   3   56.09   11.00
  14   0   3   68.59   14.80
  14   0   3   28.40   28.50
  14   0   3   66.69    5.80
 -14   0  -3   56.79   11.70
  16   0   3  339.27   20.70
 -16   0  -3  304.47   18.30
 -16   0  -3  271.67   21.40
  16   0   3  263.37   22.40
 -16   0  -3  292.47   18.30
  16   0   3  266.47   31.40
 -16   0  -3  288.97   20.80
  16   0   3  157.18   59.29
  16   0   3  297.77   26.50
  16   0   3  286.07   19.80
 -16   0  -3  293.87   19.60
  16   0   3  272.97   17.40
 -16   0  -3  314.47   29.90
  16   0   3  253.17   25.30
 -18   0  -3   41.70    7.20
  18   0   3   23.40    4.10
  18   0   3   28.20    5.10
  18   0   3    6.50   22.50
  18   0   3   22.60    3.90
  18   0   3   29.40   11.60
 -18   0  -3   17.80    8.80
 -18   0  -3   22.70    4.80
 -18   0  -3   22.50    5.40
 -18   0  -3   42.90    8.70
 -18   0  -3   29.80    4.20
  18   0   3   22.20    6.50
 -20   0  -3  138.89   13.70
  20   0   3  115.39   14.20
  20   0   3  118.79   12.20
 -20   0  -3   95.59   27.80
 -20   0  -3  129.89   13.10
  20   0   3  111.99    8.90
 -20   0  -3  132.79   11.80
  20   0   3  127.29   13.00
 -20   0  -3  105.89   21.40
 -20   0  -3  149.29   15.40
  20   0   3  132.89   10.00
  20   0   3  108.69   18.30
 -20   0  -3  115.49    9.40
 -22   0  -3  117.49   13.10
 -22   0  -3  115.39   35.80
  22   0   3  113.79   12.10
  22   0   3   98.39   12.70
  22   0   3  109.09   14.60
 -22   0  -3  117.79   11.60
 -22   0  -3  121.99   10.60
  22   0   3  113.89    9.30
  22   0   3  110.59    8.50
  22   0   3   92.39   23.20
  24   0   3    5.90    4.40
  24   0   3   12.00    3.00
 -24   0  -3   15.90    5.30
 -24   0  -3   10.80    3.50
 -24   0  -3   18.30    6.00
  24   0   3   10.80    3.00
  24   0   3   11.80    4.60
 -26   0  -3    3.10    2.30
 -26   0  -3    0.40    3.30
  26   0   3    7.10    4.50
  26   0   3    7.50    3.20
 -26   0  -3    1.20    3.30
 -26   0  -3    1.40    3.60
  26   0   3    8.20    2.30
  26   0   3    3.00    2.40
  28   0   3   13.70    4.80
 -28   0  -3   14.30    5.00
 -28   0  -3   24.30    4.60
  28   0   3   16.40    4.10
  28   0   3    9.80    4.00
 -28   0  -3   19.70    5.00
  30   0   3    4.00    2.40
 -30   0  -3   12.50    3.80
 -30   0  -3    3.00    2.40
  31  -1  -3    1.80    1.90
 -31  -1   3    9.50    3.00
 -31  -1   3    5.20    3.20
 -31   1   3    1.60    2.40
 -31   1   3   10.70    3.40
  31   1  -3    1.60    2.40
 -31   1   3    4.80    2.80
 -29  -1   3    3.80    2.20
  29  -1  -3    3.90    3.00
  29  -1  -3    6.40    2.40
  29  -1  -3    3.00    1.70
 -29  -1   3    2.70    2.50
  29   1  -3    2.00    2.40
  29   1  -3    7.10    3.50
 -29   1   3    4.60    2.20
 -29   1   3    4.10    3.10
 -29   1   3    5.60    2.90
  29   1  -3    3.00    3.20
  27  -1  -3   12.10    3.50
  27  -1  -3    4.20    3.70
  27  -1  -3    7.30    2.70
 -27  -1   3    6.70    3.40
 -27  -1   3    4.70    2.30
  27  -1  -3    8.20    2.20
 -27   1   3    7.80    4.40
  27   1  -3    8.30    3.40
 -27   1   3    1.70    3.00
 -27   1   3    5.90    3.50
 -27   1   3   13.70    4.40
  27   1  -3    7.00    3.90
  27   1  -3    1.80    3.40
 -25  -1   3   11.30    4.60
 -25  -1   3   24.00    4.90
  25  -1  -3   16.30    5.20
  25  -1  -3   15.30    3.60
 -25  -1   3   19.00    6.40
  25  -1  -3   27.40    8.00
 -25   1   3   10.20    3.30
 -25   1   3   23.90    7.10
 -25   1   3   13.90    4.90
  25   1  -3    8.90    4.70
  25   1  -3   12.80    4.70
  25   1  -3   25.10    5.70
 -25   1   3   12.00    4.90
 -23  -1   3  162.88   31.50
  23  -1  -3  172.28   14.60
 -23  -1   3  173.98   15.10
  23  -1  -3  203.88   37.50
 -23  -1   3  185.48   13.00
 -23  -1   3  165.38   10.40
  23  -1  -3  173.58   11.90
  23  -1  -3  171.68   11.30
  23  -1  -3  130.89   33.90
 -23  -1   3  150.08   15.50
  23  -1  -3  172.28   13.90
  23  -1  -3  170.58   16.20
  23   1  -3  162.38   35.30
 -23   1   3  176.18   13.90
  23   1  -3  161.18   18.10
 -23   1   3  110.09   32.80
 -23   1   3  196.48   16.00
  23   1  -3  191.18   15.00
 -23   1   3  187.48   17.70
 -23   1   3  152.98   46.50
  23   1  -3  115.39   57.79
  23   1  -3  162.38   14.90
 -23   1   3  171.58   11.50
  21  -1  -3   73.69    6.50
 -21  -1   3  100.89   16.20
 -21  -1   3   75.39    8.60
  21  -1  -3   66.79    8.80
  21  -1  -3   64.29    5.70
 -21  -1   3   59.49    6.00
 -21  -1   3   73.29    6.90
  21  -1  -3   70.89    8.20
  21  -1  -3   63.99   15.30
 -21  -1   3   75.49    5.40
  21  -1  -3   69.39   14.80
 -21  -1   3   73.19   15.30
 -21   1   3   54.89    6.00
  21   1  -3   61.69    8.30
 -21   1   3   67.99    7.90
  21   1  -3   69.89   10.40
  21   1  -3   71.29   10.60
  21   1  -3   53.69   65.69
 -21   1   3   62.49    9.50
  21   1  -3   68.79    8.60
  21   1  -3   64.29    5.60
 -21   1   3   74.49   11.10
 -21   1   3   42.60   13.80
 -21   1   3   71.69    6.70
  21   1  -3   50.19   17.90
 -19  -1   3  197.08   20.20
 -19  -1   3  191.18   11.20
  19  -1  -3  183.98   12.00
 -19  -1   3  191.98   12.30
 -19  -1   3  175.28   16.10
  19  -1  -3  167.38   24.50
 -19  -1   3  196.78   14.20
  19  -1  -3  176.78   11.60
  19  -1  -3  195.08   15.10
  19  -1  -3  181.38   13.90
 -19  -1   3  168.08   13.30
  19  -1  -3  164.38   18.40
 -19  -1   3  160.38   20.30
 -19  -1   3  188.88   11.60
  19   1  -3  187.18   17.20
 -19   1   3  200.38   13.60
  19   1  -3  176.88   22.30
  19   1  -3  171.18   14.70
 -19   1   3  132.59   29.40
 -19   1   3  195.68   16.90
  19   1  -3  188.18   11.50
  19   1  -3  195.58   17.60
 -19   1   3  221.48   16.10
 -19   1   3  203.08   22.30
 -19   1   3  198.58   12.10
 -19   1   3  187.58   12.30
  19   1  -3  177.08   11.60
  17  -1  -3    3.10    2.10
 -17  -1   3    0.80    3.10
  17  -1  -3    5.90    7.40
 -17  -1   3    2.70    2.50
 -17  -1   3    4.70    6.40
 -17  -1   3    3.80    1.30
  17  -1  -3    3.10    5.00
 -17  -1   3    2.30    2.20
  17  -1  -3    8.30    2.40
  17  -1  -3    3.80    1.50
 -17  -1   3    3.50    2.50
  17  -1  -3   14.00   10.80
  17  -1  -3    5.90    3.70
  17   1  -3    0.40    3.40
  17   1  -3  -22.80   18.60
  17   1  -3   -9.20    5.80
 -17   1   3    6.10    2.60
  17   1  -3    0.70    3.70
  17   1  -3    8.10    4.00
  17   1  -3    3.80    1.70
 -17   1   3    3.70    1.50
  17   1  -3    3.50    1.90
  17   1  -3    3.30    1.50
  17   1  -3   -0.10    8.70
  17   1  -3    5.40    5.60
 -17   1   3   14.00    5.50
 -17   1   3    7.50    5.40
 -15  -1   3   79.09   10.00
  15  -1  -3   75.09    9.20
  15  -1  -3   92.29   12.30
 -15  -1   3   70.49    5.40
 -15  -1   3   74.19   12.90
  15  -1  -3   77.29    5.60
 -15  -1   3   79.19    6.80
  15  -1  -3   72.19    6.70
  15   1  -3   60.29    7.00
  15   1  -3   42.20   15.20
  15   1  -3   51.59   14.60
  15   1  -3   71.49   12.30
 -15   1   3   86.29   11.90
  15   1  -3   69.19    9.90
  15   1  -3   74.89   30.30
  15   1  -3   70.49    8.20
 -13  -1   3   90.29    7.80
 -13  -1   3   74.89    5.70
  13  -1  -3   95.79    8.80
 -13  -1   3   65.09   10.60
  13  -1  -3   75.59    5.80
  13  -1  -3   77.69   11.60
 -13  -1   3   85.49    9.10
  13  -1  -3   84.09    6.90
 -13   1   3   77.69   13.30
  13   1  -3   87.59   28.50
  13   1  -3   81.89    9.20
  13   1  -3   76.89    7.70
 -13   1   3   91.29   11.00
  13   1  -3   89.49   13.40
  13   1  -3   83.29   11.10
  13   1  -3   88.19   13.70
 -11  -1   3  605.24   38.10
 -11  -1   3  659.23   36.60
 -11  -1   3  644.54   34.30
  11  -1  -3  621.04   67.69
  11  -1  -3  607.04   35.20
 -11  -1   3  569.14   33.20
  11  -1  -3  547.65   32.80
 -11   1   3  660.73   37.80
 -11   1   3  614.74   42.40
  11   1  -3  631.54   58.19
  11   1  -3  615.34   36.00
  11   1  -3  572.14   43.10
  11   1  -3  576.74   38.50
   9  -1  -3  346.47   21.90
   9  -1  -3  319.87   43.90
  -9  -1   3  336.47   20.10
  -9  -1   3  382.36   23.10
  -9  -1   3  325.87   24.70
   9  -1  -3  330.97   19.60
   9  -1  -3  375.86   21.90
  -9  -1   3  359.76   23.10
   9   1  -3  398.36   27.30
  -9   1   3  395.56   27.40
   9   1  -3  387.86   40.20
   9   1  -3  375.36   22.20
  -9   1   3  341.57   30.50
   9   1  -3  382.66   24.30
   9   1  -3  296.77   23.80
  -7  -1   3  106.49    7.90
   7  -1  -3  128.89   11.70
  -7  -1   3  124.89    9.90
   7  -1  -3  104.89    8.20
   7  -1  -3  129.59    9.40
   7  -1  -3   93.59   21.70
  -7  -1   3  121.69   10.40
  -7  -1   3  123.19   10.40
  -7   1   3  116.09   14.80
  -7   1   3  145.39   12.40
   7   1  -3  104.49   15.10
   7   1  -3  121.49   10.30
   7   1  -3  113.39   11.70
  -7   1   3  133.99    9.40
   7   1  -3  120.69   10.10
  -7   1   3  114.89   12.70
   7   1  -3  140.09   19.90
   5  -1  -3 1231.38   67.59
  -5  -1   3 1224.48   65.69
   5  -1  -3 1117.09   63.89
   5  -1  -3 1123.99   62.19
  -5  -1   3 1166.78   63.99
   5  -1  -3 1134.19   62.69
  -5  -1   3 1159.78   64.49
   5  -1  -3 1209.38   78.89
  -5   1   3 1350.76   66.09
   5   1  -3 1272.47   67.39
  -5   1   3 1177.68   69.89
  -5   1   3 1210.88   78.59
  -5   1   3 1256.77   62.59
   5   1  -3 1245.38   64.59
   5   1  -3 1068.69   61.79
   5   1  -3 1242.68   77.19
   5   1  -3 1169.08   63.89
   5   1  -3 1301.27   65.69
  -5   1   3 1174.68   68.89
   5   1  -3 1135.59   64.59
  -3  -1   3 2270.57  113.19
   3  -1  -3 2135.69  113.19
  -3  -1   3 2141.59  115.49
   3  -1  -3 2062.39  117.59
   3  -1  -3 2145.49  112.79
  -3  -1   3 2097.19  114.19
   3   1  -3 2322.07  114.19
   3   1  -3 2146.69  113.49
   3   1  -3 2215.38  124.09
   3   1  -3 2038.40  118.99
  -3   1   3 2092.09  119.09
  -3   1   3 2192.68  111.89
  -3   1   3 2081.29  125.09
  -3   1   3 2473.85  114.69
   3   1  -3 2264.67  112.19
   3   1  -3 2359.36  115.09
   3   1  -3 2353.66  116.79
  -1  -1   3   16.80    3.70
   1  -1  -3   14.90    2.70
  -1  -1   3   17.80    2.00
   1  -1  -3   11.00    3.50
  -1  -1   3   14.90    2.20
  -1  -1   3   14.90    3.00
   1  -1  -3   18.10    2.80
   1   1  -3    8.40    3.60
   1   1  -3   25.50    5.20
   1   1  -3   14.50    3.00
  -1   1   3   14.80    2.10
  -1   1   3   13.40    3.70
   1   1  -3   19.20    4.10
  -1   1   3    8.50    3.80
  -1  -1  -3 1895.91   98.59
   1  -1   3 2027.90  100.09
  -1  -1  -3 1785.52   95.99
   1  -1   3 1895.51   97.49
  -1  -1  -3 1920.61   98.79
  -1  -1  -3 1858.31   97.79
   1   1   3 1979.10   98.79
   1   1   3 1861.11   99.99
   1   1   3 1795.42  106.49
  -1   1  -3 1962.40   97.89
  -1   1  -3 1976.40  101.79
   1   1   3 1786.92   99.29
   1   1   3 1885.01   97.49
   1   1   3 1832.02   95.69
  -1   1  -3 1685.73  103.49
  -1   1  -3 1649.54   99.59
  -1   1  -3 1944.71  100.59
  -1   1  -3 1954.90   99.59
   3  -1   3 1123.89   59.09
  -3  -1  -3 1038.90   57.09
   3  -1   3 1126.79   57.09
  -3  -1  -3 1099.99   58.89
  -3  -1  -3 1049.79   58.99
   3  -1   3 1177.18   62.09
  -3   1  -3  938.31   64.59
  -3   1  -3 1147.59   58.99
   3   1   3 1144.19   58.89
  -3   1  -3 1086.59   57.49
  -3   1  -3 1135.99   62.99
  -3   1  -3 1095.59   62.39
   3   1   3  929.01   55.89
  -3   1  -3 1126.19   57.19
   3   1   3 1136.89   69.89
  -3   1  -3  915.21   58.99
   3   1   3 1058.89   60.29
   3   1   3 1137.79   59.99
  -5  -1  -3  345.27   21.50
   5  -1   3  396.96   24.00
  -5  -1  -3  368.66   26.80
  -5  -1  -3  414.46   25.30
   5  -1   3  358.66   22.00
   5  -1   3  445.16   29.10
  -5  -1  -3  402.26   23.70
   5  -1   3  424.36   25.80
  -5  -1  -3  405.06   25.10
  -5   1  -3  348.87   23.40
   5   1   3  415.96   25.40
  -5   1  -3  404.16   24.80
  -5   1  -3  391.16   28.60
   5   1   3  438.46   37.00
  -5   1  -3  392.06   23.60
   5   1   3  384.26   26.10
   5   1   3  424.56   25.00
  -7  -1  -3 1049.59   60.89
   7  -1   3 1142.49   61.19
  -7  -1  -3  992.60   55.19
  -7  -1  -3 1088.49   58.49
   7  -1   3 1024.10   62.09
  -7  -1  -3 1010.30   61.09
   7  -1   3  975.50   56.39
  -7  -1  -3  929.91   66.19
   7  -1   3 1121.99   64.79
   7  -1   3  918.01   77.29
  -7   1  -3 1077.99   64.29
  -7   1  -3 1019.40   60.19
   7   1   3 1183.28   60.49
   7   1   3 1013.50   60.79
   7   1   3 1100.19   77.39
  -7   1  -3 1082.79   57.09
   7   1   3 1166.48   59.89
   9  -1   3 1043.60   88.29
   9  -1   3 1090.99   60.29
  -9  -1  -3 1139.99   60.29
   9  -1   3 1211.68   66.99
  -9  -1  -3 1192.98   64.79
   9  -1   3 1127.19   74.99
   9  -1   3 1077.99   62.49
   9  -1   3 1149.98   66.59
  -9  -1  -3 1271.67   65.89
  -9   1  -3 1159.18   67.79
  -9   1  -3 1167.18   71.99
   9   1   3 1262.87   66.59
   9   1   3 1044.90   66.29
  -9   1  -3 1019.30   67.29
  -9   1  -3 1195.68   61.79
   9   1   3 1289.67   89.29
   9   1   3 1109.99   67.69
   9   1   3 1054.19   61.09
  11  -1   3   17.50    8.00
 -11  -1  -3   18.70    3.30
 -11  -1  -3   21.10    5.60
  11  -1   3   32.90   10.00
  11  -1   3   15.10    2.90
  11  -1   3   13.20    4.90
  11  -1   3   23.90    6.00
  11  -1   3   27.30    6.20
 -11  -1  -3   22.60    2.80
 -11  -1  -3   18.00    5.50
  11   1   3   21.90    6.90
  11   1   3   15.00    4.80
 -11   1  -3   22.50    5.20
  11   1   3   25.80    5.20
 -11   1  -3   18.30    7.30
  11   1   3   14.70    5.70
  11   1   3   25.30   17.80
 -11   1  -3   26.20    8.50
  13  -1   3  116.19    8.30
  13  -1   3  131.19    9.90
  13  -1   3  118.19   14.60
  13  -1   3  106.09   11.90
  13  -1   3  112.69   16.40
 -13  -1  -3  115.09   12.20
 -13  -1  -3  124.39   14.20
 -13  -1  -3  111.79    7.80
  13  -1   3  107.39   18.20
 -13  -1  -3  115.39    9.10
 -13   1  -3  114.89   19.20
  13   1   3   90.59   15.20
  13   1   3  106.79   10.70
 -13   1  -3  131.39   16.90
  13   1   3  156.78   34.60
  13   1   3  120.89   14.50
  13   1   3  139.89   16.40
  15  -1   3    0.10    7.70
  15  -1   3    7.60    2.20
 -15  -1  -3    9.90    3.60
  15  -1   3   17.30    4.20
  15  -1   3   12.70    5.10
 -15  -1  -3   17.60    6.00
 -15  -1  -3    9.80    2.80
 -15  -1  -3    8.50    2.70
  15  -1   3   10.20    3.40
  15  -1   3   -6.30    7.50
  15  -1   3   10.30    5.50
 -15  -1  -3   18.00    7.50
 -15   1  -3    9.90    5.40
 -15   1  -3   19.30    5.20
  15   1   3   16.30    3.40
  15   1   3   14.30    3.90
  15   1   3  -25.10   24.00
  15   1   3   10.10    4.10
 -15   1  -3    8.00    3.00
  15   1   3   -2.60    7.40
  15   1   3   16.90    5.60
  15   1   3   19.20   10.00
 -15   1  -3   10.60    4.80
  15   1   3   14.70    5.90
 -15   1  -3   13.30    3.10
 -15   1  -3   10.40    8.20
 -15   1  -3    4.30    4.30
  17  -1   3   32.50    9.80
  17  -1   3   37.00    4.60
 -17  -1  -3   54.89    8.40
 -17  -1  -3   32.20    4.00
 -17  -1  -3   26.60    5.30
  17  -1   3   35.90    4.10
 -17  -1  -3   37.90    5.60
 -17  -1  -3   40.60    9.30
  17  -1   3   44.50    7.70
 -17  -1  -3   35.00   12.40
  17  -1   3   27.00   10.20
 -17  -1  -3   34.00    3.90
  17   1   3   33.00    4.30
  17   1   3   36.40    7.90
  17   1   3   34.60    6.30
  17   1   3   38.30   12.00
 -17   1  -3   36.50    4.60
 -17   1  -3   36.60    4.70
 -17   1  -3   22.00    7.30
 -17   1  -3   42.20    8.30
  17   1   3   40.50    7.00
 -17   1  -3   36.30    7.10
  17   1   3   49.40    9.70
  17   1   3   49.99   39.20
 -17   1  -3   26.00    7.70
 -19  -1  -3   33.60   13.00
  19  -1   3   25.20   11.80
  19  -1   3   60.09    5.90
  19  -1   3   53.59    8.10
  19  -1   3   51.69    7.30
 -19  -1  -3   37.60   14.20
  19  -1   3   46.40    8.50
  19  -1   3   47.60   16.90
 -19  -1  -3   47.90    4.50
 -19  -1  -3   36.70    5.30
 -19  -1  -3   43.00   10.60
  19   1   3   46.20    6.80
  19   1   3   47.60   17.50
  19   1   3   64.29   14.60
 -19   1  -3   39.00    8.30
  19   1   3   46.70    9.80
 -19   1  -3   29.40   14.80
  19   1   3   46.00    4.70
 -19   1  -3   38.20   12.10
  19   1   3  -51.09   57.19
 -19   1  -3   45.00    8.90
  21  -1   3   11.80    9.40
 -21  -1  -3    5.10    1.90
 -21  -1  -3    9.70    4.20
 -21  -1  -3    3.50    2.40
 -21  -1  -3    7.90   10.00
  21  -1   3    4.30    2.90
  21  -1   3    7.40    4.30
  21  -1   3    7.30    2.60
  21  -1   3   16.90    6.30
 -21  -1  -3    4.30    2.70
  21  -1   3   10.60    2.90
 -21   1  -3   10.00    4.60
 -21   1  -3    6.70    4.20
 -21   1  -3   12.90    3.30
  21   1   3    4.40    2.00
  21   1   3    7.90    4.70
  21   1   3    3.80   14.80
  21   1   3    7.60    5.20
  21   1   3   21.30   81.79
 -21   1  -3  -12.60   17.50
 -21   1  -3    8.60    4.60
  21   1   3    9.50    4.90
 -21   1  -3    7.60    4.30
  23  -1   3  200.38   27.00
  23  -1   3  225.38   18.70
  23  -1   3  224.38   15.40
  23  -1   3  221.78   14.50
  23  -1   3  231.88   18.60
 -23  -1  -3  234.88   23.40
 -23  -1  -3  254.47   17.60
 -23  -1  -3  240.28   17.40
 -23   1  -3  231.18   15.40
  23   1   3  188.98   17.90
 -23   1  -3  229.28   17.90
  23   1   3  227.98   23.30
 -23   1  -3  226.88   23.70
 -23   1  -3  254.87   20.20
  23   1   3  220.88   19.60
  25  -1   3   15.60    9.70
  25  -1   3    9.90    3.90
  25  -1   3   11.10    4.30
  25  -1   3    9.80    5.30
 -25  -1  -3    9.60    4.40
 -25  -1  -3   18.40    5.20
 -25   1  -3    7.30    5.50
  25   1   3    7.70    4.80
  25   1   3    8.30    4.20
 -25   1  -3   18.60    7.10
  25   1   3    7.60    3.90
 -25   1  -3   18.40    5.20
  27  -1   3   41.80    5.80
 -27  -1  -3   54.09    8.00
  27  -1   3   37.60    6.90
 -27  -1  -3   43.50    5.80
 -27  -1  -3   49.20    6.50
  27  -1   3   50.89    5.60
  27   1   3   43.70    7.10
 -27   1  -3   57.59    8.00
 -27   1  -3   31.30    8.60
 -27   1  -3   55.49    6.90
 -29  -1  -3   25.00    5.30
  29  -1   3   28.60    5.40
 -29   1  -3   30.30    6.00
  29   1   3   35.70    6.00
 -29   1  -3   39.00    5.30
  29   1   3   36.00    6.60
  30  -2  -3    0.90    1.20
  30  -2  -3    0.90    2.50
  30  -2  -3    3.80    1.50
 -30  -2   3    0.10    1.40
  30   2  -3   -1.30    2.50
 -30   2   3   -1.50    1.90
 -30   2   3    1.50    1.90
  30   2  -3    0.50    1.60
 -30   2   3    0.50    2.00
  28  -2  -3    1.10    1.50
  28  -2  -3   -0.60    1.60
  28  -2  -3   -2.20    1.80
 -28  -2   3   -0.90    2.20
  28  -2  -3    3.00    1.20
 -28  -2   3    2.60    1.90
 -28  -2   3    0.80    3.50
 -28   2   3    2.70    4.00
 -28   2   3    1.30    2.80
 -28   2   3   -1.40    2.30
  28   2  -3    1.80    3.00
  28   2  -3    0.70    3.30
  28   2  -3    2.90    2.50
 -28   2   3    0.20    2.10
 -26  -2   3    4.90    2.50
 -26  -2   3    2.00    1.90
  26  -2  -3    5.60    2.10
  26  -2  -3    3.00    2.50
  26  -2  -3    8.90    3.00
  26  -2  -3    2.60    4.10
 -26  -2   3   11.50    3.40
 -26  -2   3    2.90    2.60
  26   2  -3    5.50    4.30
 -26   2   3    1.00    4.20
 -26   2   3    0.90    3.30
 -26   2   3    4.40    4.00
  26   2  -3    2.20    3.00
  26   2  -3    6.00    2.90
 -26   2   3    8.60    3.80
 -26   2   3    7.30    2.50
 -24  -2   3   10.20    4.00
 -24  -2   3    8.30    2.70
  24  -2  -3   23.50    6.00
  24  -2  -3   16.20    3.00
  24  -2  -3    9.50    4.00
 -24  -2   3   13.10    3.70
 -24  -2   3   18.10    5.70
  24  -2  -3   16.50    3.80
  24   2  -3    7.50    4.70
 -24   2   3    2.50    5.10
 -24   2   3   10.10    4.30
  24   2  -3   10.00    4.80
 -24   2   3   11.90    3.10
 -24   2   3   16.40    3.70
 -24   2   3   15.60    5.90
  24   2  -3   11.20    4.70
 -24   2   3   10.20    4.90
  22  -2  -3   42.20    4.40
  22  -2  -3   27.00   17.10
 -22  -2   3   27.20    7.20
 -22  -2   3   36.20    5.30
  22  -2  -3   43.40    6.90
  22  -2  -3   35.30    6.50
  22  -2  -3   48.80   27.40
  22  -2  -3   42.70    4.90
 -22  -2   3   41.50    4.70
 -22  -2   3   39.00    6.90
 -22  -2   3   41.30    4.10
 -22   2   3   39.90    4.90
  22   2  -3   37.50    4.50
 -22   2   3   -9.50   28.90
 -22   2   3   50.09    9.90
 -22   2   3   37.90    8.40
 -22   2   3   39.30    4.60
  22   2  -3   35.80    7.90
  22   2  -3  -35.10   57.79
 -22   2   3   21.30    7.40
  22   2  -3   27.30    7.60
  22   2  -3   33.50    9.40
 -22   2   3   34.90   10.50
 -20  -2   3   27.30    4.00
  20  -2  -3   23.50    3.40
 -20  -2   3   28.80    3.70
  20  -2  -3   20.20    5.10
  20  -2  -3   33.60    5.90
 -20  -2   3   24.90    3.30
 -20  -2   3   28.10    5.70
  20  -2  -3   33.30   12.90
  20  -2  -3   31.30    4.70
 -20  -2   3   22.80    5.00
  20   2  -3   21.80    3.20
  20   2  -3   -5.60   14.20
 -20   2   3   29.50    4.10
  20   2  -3   26.40    7.30
 -20   2   3   20.20    6.00
  20   2  -3    5.30   33.30
  20   2  -3   18.50    6.20
  20   2  -3   17.60    6.00
 -20   2   3    2.00   11.50
 -20   2   3   22.00    3.90
 -20   2   3   19.50    6.90
  20   2  -3   32.40    7.00
 -18  -2   3    6.50    2.60
 -18  -2   3    0.70    2.10
  18  -2  -3    3.70    6.70
 -18  -2   3   -1.80    8.80
 -18  -2   3    7.10    4.40
 -18  -2   3    4.00    2.30
  18  -2  -3    2.40    3.50
  18  -2  -3    7.40    2.30
  18  -2  -3    6.40    2.60
  18  -2  -3    3.30    2.30
 -18   2   3    7.00    4.00
  18   2  -3    1.50    3.00
 -18   2   3    5.00    3.60
  18   2  -3   55.69   31.00
 -18   2   3    2.30    9.40
 -18   2   3    1.70   13.70
 -18   2   3    1.60    1.50
  18   2  -3    6.70    3.70
  18   2  -3    0.20    1.40
 -18   2   3    4.50    7.50
 -18   2   3    4.30    3.60
 -18   2   3    4.30    2.20
  18   2  -3   -2.50   10.40
  18   2  -3   -1.10    3.30
  18   2  -3    3.10    3.70
  16  -2  -3   42.80    5.30
 -16  -2   3   34.60   12.30
  16  -2  -3   41.00    4.10
 -16  -2   3   35.40    8.70
 -16  -2   3   42.20    4.00
 -16  -2   3   47.60    4.30
  16  -2  -3   35.20    7.20
 -16  -2   3   46.40    8.10
 -16  -2   3   44.00    5.50
 -16   2   3   39.30    5.20
  16   2  -3   42.10    4.20
 -16   2   3   33.40    8.60
 -16   2   3   21.40   12.90
 -16   2   3   39.40    4.20
 -16   2   3   25.80    9.40
  16   2  -3   31.70   12.30
  16   2  -3   33.90    7.50
 -16   2   3   52.49   18.80
  16   2  -3   46.70    3.90
  16   2  -3   30.40    7.50
  16   2  -3   22.90    7.60
  16   2  -3   38.00    7.60
 -16   2   3   52.49   10.30
  16   2  -3   20.10   11.00
  16   2  -3   20.00   23.10
 -16   2   3   33.40    7.10
  14  -2  -3  159.08   17.90
 -14  -2   3  162.08   14.20
 -14  -2   3  150.28   10.70
 -14  -2   3  147.89    9.10
  14  -2  -3  137.09    8.90
  14  -2  -3  152.58   10.20
 -14  -2   3  135.89   10.60
 -14  -2   3  168.78   16.60
 -14   2   3  124.19   12.90
  14   2  -3  125.79   15.50
  14   2  -3  119.69    9.60
  14   2  -3  120.99   29.50
  14   2  -3  120.29   16.80
 -14   2   3  126.09    9.00
  14   2  -3  145.19   31.40
 -14   2   3  121.79   23.20
  14   2  -3  135.79    8.80
  14   2  -3  132.79   12.40
 -14   2   3  122.59   18.20
 -12  -2   3  152.78   10.20
  12  -2  -3  188.28   13.70
 -12  -2   3  178.78   11.70
  12  -2  -3  195.28   17.90
 -12  -2   3  163.68   15.30
  12  -2  -3  170.58   11.10
 -12  -2   3  170.78   14.60
 -12   2   3  158.38   67.29
  12   2  -3  148.19   17.50
  12   2  -3  144.29   21.20
  12   2  -3  136.59   33.10
 -10  -2   3  569.64   33.70
  10  -2  -3  480.05   28.80
 -10  -2   3  492.75   28.50
 -10  -2   3  546.45   33.30
  10  -2  -3  535.15   36.80
 -10  -2   3  579.44   34.20
  10  -2  -3  589.34   32.40
  10   2  -3  512.75   38.90
 -10   2   3  560.54   44.40
  10   2  -3  473.05   36.30
 -10   2   3  550.84   41.20
 -10   2   3  538.55   62.69
  10   2  -3  518.25   50.99
  -8  -2   3  190.58   12.00
   8  -2  -3  196.68   17.80
  -8  -2   3  201.28   15.90
   8  -2  -3  172.18   11.40
  -8  -2   3  173.08   15.40
  -8  -2   3  189.18   14.40
   8  -2  -3  220.88   14.80
  -8   2   3  252.37   33.70
  -8   2   3  212.08   21.40
   8   2  -3  181.38   16.60
   8   2  -3  166.58   22.40
  -8   2   3  194.68   21.00
   8   2  -3  156.38   24.10
   8   2  -3  165.88   18.90
   6  -2  -3  298.27   17.40
  -6  -2   3  345.57   21.10
  -6  -2   3  330.47   22.30
  -6  -2   3  269.67   20.00
   6  -2  -3  282.27   17.50
   6  -2  -3  315.87   20.70
   6   2  -3  281.17   29.90
  -6   2   3  303.27   27.60
  -6   2   3  342.07   31.60
   6   2  -3  308.87   28.40
   6   2  -3  340.77   28.90
   6   2  -3  262.57   24.30
  -6   2   3  290.67   26.30
   4  -2  -3 1036.40   57.99
  -4  -2   3 1116.89   63.19
  -4  -2   3 1156.48   61.69
  -4  -2   3 1003.20   58.09
   4  -2  -3 1245.68   67.19
   4  -2  -3 1102.59   57.59
  -4  -2   3 1032.00   59.09
   4   2  -3 1110.59   68.29
   4   2  -3 1050.99   65.99
  -4   2   3 1082.79   64.59
  -4   2   3 1122.79   66.59
   2  -2  -3  444.96   25.60
  -2  -2   3  389.36   23.10
   2  -2  -3  444.06   32.20
  -2  -2   3  453.05   28.50
  -2  -2   3  446.96   26.30
  -2  -2   3  412.06   24.70
   2   2  -3  408.56   31.20
  -2   2   3  485.05   31.30
   2   2  -3  433.46   33.30
  -2   2   3  392.66   31.90
  -2   2   3  459.15   35.50
   2   2  -3  401.86   36.30
   2   2  -3  415.96   30.70
   0  -2   3   23.00    4.60
   0  -2  -3   12.20    4.80
   0  -2  -3   27.40    4.70
   0  -2   3   17.80    3.10
   0   2  -3   24.80    8.00
   0   2  -3   21.80    6.80
   0   2  -3   18.90    6.70
   0   2   3   22.50    7.00
   0   2   3   32.40   11.20
   0   2  -3   16.60    6.30
   2  -2   3 1433.96   76.89
  -2  -2  -3 1305.77   69.49
  -2  -2  -3 1331.37   72.59
   2  -2   3 1373.16   73.49
   2  -2   3 1214.58   70.09
   2   2   3 1240.28   78.49
  -2   2  -3 1449.55   76.09
   2   2   3 1420.76   75.49
  -2   2  -3 1364.36   78.79
   2   2   3 1268.07   81.99
  -2   2  -3 1312.97   74.29
  -2   2  -3 1440.06   82.09
  -2   2  -3 1224.08   80.09
   2   2   3 1462.35   83.49
   4  -2   3  589.24   33.10
  -4  -2  -3  603.74   32.70
  -4  -2  -3  581.24   37.10
  -4  -2  -3  604.54   33.70
   4  -2   3  638.74   40.80
   4  -2   3  621.94   37.30
  -4   2  -3  639.94   43.40
   4   2   3  559.44   37.20
  -4   2  -3  523.85   39.00
   4   2   3  556.24   40.30
   4   2   3  632.04   47.40
  -4   2  -3  537.45   38.60
  -4   2  -3  602.24   42.20
   6  -2   3   93.99   10.90
  -6  -2  -3   87.19   13.30
   6  -2   3   83.69    5.70
  -6  -2  -3   90.39    7.70
  -6  -2  -3   98.99    6.60
   6  -2   3   91.39    8.20
  -6  -2  -3   78.39    9.90
  -6  -2  -3   82.29    7.60
   6  -2   3   73.69   12.30
   6  -2   3   91.69    6.10
  -6   2  -3   94.99   14.80
   6   2   3   80.79   18.60
   6   2   3   77.49   13.20
  -6   2  -3   62.39   15.00
  -6   2  -3   90.79   10.90
  -6   2  -3   73.79   10.80
   6   2   3   83.89   10.50
  -8  -2  -3  327.37   18.40
   8  -2   3  332.67   29.80
  -8  -2  -3  346.77   21.30
   8  -2   3  321.87   22.10
  -8  -2  -3  312.37   24.30
   8  -2   3  301.57   17.90
   8  -2   3  278.97   18.50
   8  -2   3  347.47   25.90
  -8   2  -3  287.67   26.70
   8   2   3  297.37   26.80
  -8   2  -3  326.67   30.80
   8   2   3  345.07   38.90
   8   2   3  290.47   27.50
 -10  -2  -3  552.24   27.70
  10  -2   3  525.15   42.90
 -10  -2  -3  556.14   29.10
  10  -2   3  427.86   36.50
 -10  -2  -3  509.15   32.50
  10  -2   3  513.15   30.30
 -10  -2  -3  507.75   35.60
  10  -2   3  534.95   37.30
  10   2   3  498.85   54.19
  10   2   3  437.66   39.50
 -10   2  -3  501.95   44.70
  10   2   3  510.75   35.60
 -12  -2  -3  743.13   48.60
  12  -2   3  790.62   41.30
 -12  -2  -3  816.62   47.40
 -12  -2  -3  769.82   39.50
  12  -2   3  727.13   39.50
  12  -2   3  708.73   50.59
  12  -2   3  720.63   57.59
 -12  -2  -3  770.52   41.30
  12  -2   3  685.63   43.60
  12   2   3  622.54   52.89
  12   2   3  706.33   74.19
 -12   2  -3  748.53   61.29
  12   2   3  777.32   49.99
  14  -2   3   28.60    9.30
  14  -2   3   14.40    3.10
 -14  -2  -3   22.70    5.30
 -14  -2  -3   17.90    3.90
  14  -2   3    6.80    7.60
 -14  -2  -3   17.80    6.80
  14  -2   3   15.70    4.00
 -14  -2  -3   16.50    7.00
  14  -2   3    8.90    7.50
 -14  -2  -3   21.20    3.10
  14  -2   3   12.70    7.10
 -14   2  -3    3.10    7.70
  14   2   3   82.69   34.30
 -14   2  -3   10.80    5.40
 -14   2  -3   12.50    3.30
 -14   2  -3   23.70    7.60
  14   2   3   13.10    5.70
  14   2   3   17.30    7.60
  14   2   3   25.50    9.60
  14   2   3    8.40    4.00
  14   2   3   26.90   11.90
 -14   2  -3   18.80    3.00
  14   2   3   12.00    2.80
 -16  -2  -3    3.70    1.40
  16  -2   3   11.30    9.10
  16  -2   3    1.70    2.00
 -16  -2  -3    0.40    3.70
 -16  -2  -3    2.70    1.50
  16  -2   3    3.20    1.50
  16  -2   3    5.00    4.40
 -16  -2  -3    4.30    2.20
 -16  -2  -3    1.20    5.30
  16  -2   3   -0.90   15.90
  16  -2   3    5.70    6.10
  16  -2   3    3.40    1.60
 -16   2  -3    2.90    2.00
 -16   2  -3   -7.60   11.20
  16   2   3   -3.60    9.40
  16   2   3    1.30    1.50
 -16   2  -3    5.60    5.70
  16   2   3   -2.40    3.80
 -16   2  -3   -3.40    3.70
  16   2   3    3.70    7.20
 -16   2  -3   15.80    6.20
  16   2   3   -2.20    3.40
  16   2   3   -2.60   12.30
  16   2   3  -20.50   25.10
 -16   2  -3   -1.80    3.30
 -18  -2  -3   30.50    3.80
 -18  -2  -3   25.80    8.10
 -18  -2  -3   31.50   12.30
  18  -2   3   31.00    4.50
 -18  -2  -3   25.10   10.50
 -18  -2  -3   26.20    4.00
  18  -2   3   27.50    5.70
  18  -2   3   24.40   10.50
  18  -2   3   32.10    6.50
 -18  -2  -3   14.20    5.70
 -18  -2  -3   30.40    5.20
  18   2   3   18.50    8.20
 -18   2  -3   28.20    8.10
  18   2   3   57.49   23.90
 -18   2  -3   32.30    8.50
 -18   2  -3   27.30    3.80
  18   2   3    3.30   35.60
  18   2   3   18.70    7.90
  18   2   3   23.70    7.20
  18   2   3   41.40    9.50
 -18   2  -3   12.10   24.00
 -18   2  -3   29.80   10.00
 -20  -2  -3  -10.00    8.80
 -20  -2  -3   -3.90    9.30
 -20  -2  -3    5.90    1.90
 -20  -2  -3    4.10    2.50
 -20  -2  -3   -0.40    4.90
  20  -2   3   13.20    5.30
 -20  -2  -3    7.10    5.40
  20  -2   3   -0.30    3.90
  20   2   3    1.10    4.60
 -20   2  -3    8.00    3.10
 -20   2  -3    1.80    5.10
 -20   2  -3   -0.10    3.30
 -20   2  -3    3.70    3.60
 -20   2  -3    1.50    3.80
  20   2   3    2.70    3.60
 -20   2  -3   12.50   19.20
 -20   2  -3    5.50    2.40
  20   2   3  -42.20   63.99
  20   2   3    2.00    4.40
  22  -2   3   79.29    7.40
  22  -2   3   65.89    8.70
  22  -2   3   70.79    6.70
 -22  -2  -3   82.59    7.70
  22  -2   3   73.09    9.60
 -22  -2  -3   64.29    6.40
 -22  -2  -3   75.29    8.30
 -22  -2  -3   67.29    6.00
 -22  -2  -3   92.39   11.70
  22   2   3   67.89   12.70
 -22   2  -3   65.09   13.50
  22   2   3   56.99   13.80
  22   2   3   11.00   96.99
 -22   2  -3   84.19    9.90
 -22   2  -3   93.29   11.60
 -22   2  -3   71.89    6.90
  22   2   3   49.90   10.00
  24  -2   3   34.40    6.30
  24  -2   3   39.20    4.50
  24  -2   3   31.90    5.50
  24  -2   3   37.80    7.50
 -24  -2  -3   33.40    5.00
 -24  -2  -3   36.90    6.20
 -24  -2  -3   36.90    3.80
 -24   2  -3   27.20    8.80
  24   2   3   24.30    8.10
 -24   2  -3   43.90    8.80
  24   2   3   34.90    6.60
  24   2   3   32.40    7.10
 -24   2  -3   43.00    6.90
 -24   2  -3   38.30    4.60
 -26  -2  -3   13.70    4.10
  26  -2   3    5.90    2.80
  26  -2   3   17.10    4.30
  26  -2   3   12.80    2.70
  26  -2   3    6.40    4.70
  26   2   3   12.10    5.40
  26   2   3    9.40    4.00
 -26   2  -3    8.40    4.80
 -26   2  -3    8.70    3.20
 -26   2  -3   14.50    4.70
 -26   2  -3   15.90    4.80
 -26   2  -3   12.30    4.20
 -26   2  -3   10.80    2.80
 -28  -2  -3   24.80    4.40
  28  -2   3   19.20    4.00
 -28  -2  -3   24.30    3.80
  28  -2   3   18.90    2.90
  28   2   3   21.80    4.70
 -28   2  -3   25.30    4.70
  28   2   3   14.00    4.60
 -28   2  -3   27.00    5.00
  28   2   3   15.90    3.90
 -28   2  -3   27.20    4.30
  29  -3  -3   14.30    2.00
 -29  -3   3   12.20    3.00
 -29   3   3    9.50    2.80
  29   3  -3   11.80    3.00
 -29   3   3   14.80    3.30
  29   3  -3   12.10    2.90
  27  -3  -3   -0.20    2.10
 -27  -3   3    3.30    2.20
  27  -3  -3   -1.70    2.90
 -27  -3   3    4.50    2.00
  27  -3  -3   -0.50    4.00
  27  -3  -3    5.70    2.00
 -27   3   3    4.70    1.70
  27   3  -3    1.00    2.70
 -27   3   3    2.60    2.90
  27   3  -3    4.00    2.70
 -27   3   3    2.20    2.80
  27   3  -3    0.20    2.80
 -27   3   3    6.00    3.10
 -27   3   3    3.40    2.90
 -25  -3   3   44.80    4.10
  25  -3  -3   50.19    7.00
 -25  -3   3   30.00    4.70
  25  -3  -3   40.70    4.10
 -25  -3   3   53.59    7.50
  25  -3  -3   28.30    6.70
 -25  -3   3   41.90    5.10
  25  -3  -3   45.00    4.80
 -25   3   3   37.70    7.60
 -25   3   3   24.50    7.70
  25   3  -3   46.80    6.40
 -25   3   3   43.20    7.70
 -25   3   3   40.80    4.20
  25   3  -3   37.80    7.60
  25   3  -3   42.70    8.30
 -25   3   3   34.40    6.80
 -25   3   3   44.80    4.60
  23  -3  -3   41.10    4.90
 -23  -3   3   37.70    4.00
  23  -3  -3   33.40    6.00
 -23  -3   3   37.00    6.90
 -23  -3   3   35.50    4.80
  23  -3  -3   36.60    4.30
 -23  -3   3   37.10    4.40
  23  -3  -3   37.40    6.90
 -23  -3   3   32.70    7.50
  23   3  -3   41.30    6.90
 -23   3   3   41.40    8.40
  23   3  -3   34.20    9.20
 -23   3   3   30.70    7.40
 -23   3   3   39.50    4.50
 -23   3   3   37.10    4.40
  23   3  -3   43.10    4.30
 -23   3   3   32.90    6.70
 -23   3   3   22.00    8.70
  21  -3  -3   14.90    5.00
  21  -3  -3   -3.70   11.10
 -21  -3   3   14.10    5.20
  21  -3  -3    9.60    2.70
 -21  -3   3    4.30    3.30
  21  -3  -3    7.50    2.90
 -21  -3   3    4.30    8.90
  21  -3  -3    1.30    2.30
 -21  -3   3    4.20    1.60
 -21  -3   3    4.00    1.80
 -21  -3   3    6.90    2.70
 -21   3   3    5.90   27.30
  21   3  -3    2.20    1.60
 -21   3   3    1.80    1.60
 -21   3   3    8.50   10.10
 -21   3   3    5.60    4.20
  21   3  -3    0.10    2.70
  21   3  -3   -2.10    5.40
 -21   3   3   -1.20    4.70
  21   3  -3    4.90    4.20
 -21   3   3    1.20    3.60
  21   3  -3    4.60    5.30
 -21   3   3    7.90    2.80
  21   3  -3    1.40   40.10
 -19  -3   3   33.00    3.70
  19  -3  -3   31.10    4.00
  19  -3  -3   18.20   12.40
 -19  -3   3   38.40    4.40
  19  -3  -3   43.60    6.30
  19  -3  -3   33.70    4.40
 -19  -3   3   32.20    5.70
 -19  -3   3   19.00    7.40
  19  -3  -3   22.40    8.90
 -19  -3   3   34.60    4.30
 -19  -3   3   22.00   12.30
 -19   3   3   20.20    9.10
 -19   3   3   28.90   11.70
 -19   3   3   35.40    4.50
 -19   3   3   47.60    9.10
 -19   3   3   32.00    5.10
  19   3  -3   37.60    8.90
 -19   3   3   21.60    8.30
  19   3  -3   42.40    8.00
  19   3  -3   36.50    3.80
  19   3  -3   23.30   19.60
  19   3  -3   27.20   32.50
 -17  -3   3    3.70    3.90
  17  -3  -3    5.10    8.00
  17  -3  -3    2.50    1.40
  17  -3  -3    2.60    1.50
 -17  -3   3   -0.40    2.40
 -17  -3   3   -0.80    1.90
  17  -3  -3    0.30    1.70
  17  -3  -3    5.90    4.80
 -17  -3   3    1.40    1.30
 -17  -3   3    2.30    1.50
 -17   3   3    0.40    2.40
 -17   3   3  -10.20    6.20
 -17   3   3   -7.10   10.20
  17   3  -3    8.10    4.80
  17   3  -3    3.90    3.40
 -17   3   3   -2.60    8.60
 -17   3   3    4.10    1.90
  17   3  -3    9.90   27.50
  17   3  -3   -4.60    7.10
  17   3  -3   -5.30    3.30
  17   3  -3    1.40    1.20
  17   3  -3  -35.30   31.10
 -17   3   3    2.40    5.70
  17   3  -3    2.50    1.30
 -17   3   3   -1.60    3.80
  15  -3  -3   78.59   10.50
 -15  -3   3   78.59    7.40
 -15  -3   3   67.99   11.20
 -15  -3   3   94.39    6.80
  15  -3  -3   98.29    8.10
  15  -3  -3   90.19    6.60
 -15  -3   3   86.89    8.30
 -15  -3   3   84.89    6.30
 -15  -3   3   95.79   17.00
 -15   3   3   74.29   10.80
 -15   3   3   73.09   11.60
  15   3  -3   88.69    6.30
 -15   3   3   83.29   14.70
 -15   3   3   88.89    6.90
 -15   3   3   84.79    8.90
  15   3  -3   67.79   13.00
 -15   3   3   80.39   21.60
 -15   3   3   70.29   68.89
  15   3  -3   59.29   21.80
  15   3  -3  108.49   11.20
  15   3  -3   94.89    6.50
 -15   3   3   67.09   25.20
  15   3  -3   42.10   25.50
  15   3  -3   76.89   11.80
  15   3  -3  110.39   12.80
 -15   3   3   69.99   15.60
  13  -3  -3  114.89    8.50
  13  -3  -3  111.19   11.20
 -13  -3   3  119.59    9.40
 -13  -3   3   93.89    7.20
  13  -3  -3  100.89    7.30
 -13  -3   3   97.69   14.50
  13  -3  -3  145.09   18.40
 -13  -3   3  110.29   12.30
  13   3  -3   62.39   23.90
  13   3  -3   70.59   18.70
  13   3  -3  107.09    7.20
 -13   3   3  114.79   12.90
 -13   3   3   95.09   12.30
  13   3  -3  105.59   30.80
 -13   3   3   91.29   16.20
 -13   3   3  103.79    7.80
 -13   3   3  127.29   15.90
  13   3  -3  105.09   13.00
  13   3  -3  105.19    7.40
 -13   3   3   99.89   26.30
 -13   3   3  121.49   24.90
  13   3  -3  122.09   12.40
 -13   3   3   69.79   42.90
 -13   3   3   96.09   10.10
  11  -3  -3  396.96   25.10
  11  -3  -3  524.05   36.80
  11  -3  -3  480.05   30.00
 -11  -3   3  538.15   32.70
 -11  -3   3  501.75   27.20
 -11  -3   3  507.75   31.50
 -11  -3   3  463.45   25.40
  11  -3  -3  457.45   25.80
  11   3  -3  476.25   50.69
  11   3  -3  514.55   33.50
 -11   3   3  523.45   48.30
 -11   3   3  389.06   25.80
 -11   3   3  394.26   34.80
  11   3  -3  487.05   25.90
  11   3  -3  484.25   48.30
  11   3  -3  455.75   29.70
 -11   3   3  420.66   26.50
 -11   3   3  427.36   28.60
  11   3  -3  459.95   42.00
 -11   3   3  394.86   41.90
  11   3  -3  465.75   25.60
   9  -3  -3  379.36   30.50
  -9  -3   3  361.16   24.00
   9  -3  -3  363.86   24.60
  -9  -3   3  386.76   26.60
  -9  -3   3  327.27   20.60
   9   3  -3  297.07   33.80
  -9   3   3  373.06   35.30
   9   3  -3  363.46   40.10
  -9   3   3  386.26   38.70
   9   3  -3  357.06   38.90
   7  -3  -3  198.28   15.90
   7  -3  -3  176.38   11.00
  -7  -3   3  194.98   16.70
   7  -3  -3  197.28   20.10
  -7  -3   3  172.68   11.70
  -7  -3   3  155.88   15.70
  -7  -3   3  182.28   14.70
   7  -3  -3  168.78   11.60
  -7   3   3  203.48   24.30
   7   3  -3  181.98   23.40
  -7   3   3  194.48   24.40
   7   3  -3  216.58   26.90
   7   3  -3  208.68   25.90
   5  -3  -3  132.19   15.80
  -5  -3   3   79.39   10.50
   5  -3  -3  118.69   12.00
   5  -3  -3   94.09    6.40
  -5  -3   3  108.39   10.90
  -5  -3   3   91.49    7.30
  -5  -3   3  106.19   11.90
   5  -3  -3  108.99    8.90
   5  -3  -3  115.79    8.30
  -5   3   3   96.29   15.60
  -5   3   3  105.79   14.70
  -5   3   3  101.99   19.10
   5   3  -3  104.09   17.60
   5   3  -3  127.19   16.90
   5   3  -3  142.49   20.70
  -3  -3   3  766.52   45.30
  -3  -3   3  707.53   45.70
  -3  -3   3  708.43   43.10
   3  -3  -3  754.22   52.19
   3  -3  -3  776.52   44.40
  -3  -3   3  736.03   41.10
   3   3  -3  773.32   51.49
   3   3  -3  653.93   42.30
  -3   3   3  705.13   56.19
  -3   3   3  683.93   49.80
   3   3  -3  680.73   52.79
  -3   3   3  728.53   51.39
   3   3  -3  722.13   54.69
   3   3  -3  795.12   43.30
   1  -3  -3  275.17   20.00
  -1  -3   3  275.97   22.00
  -1  -3   3  250.97   19.60
   1  -3  -3  303.97   27.80
   1  -3  -3  232.58   21.20
  -1  -3   3  239.98   23.80
  -1  -3   3  227.78   16.10
  -1   3   3  261.67   24.10
   1   3  -3  257.27   27.10
   1   3  -3  248.98   25.10
  -1   3   3  306.07   30.70
   1   3  -3  286.07   27.70
  -1   3   3  255.77   25.50
  -1  -3  -3  428.16   28.20
  -1  -3  -3  362.16   21.30
  -1  -3  -3  335.37   21.00
   1  -3   3  341.47   24.40
   1  -3   3  437.26   29.50
   1  -3   3  390.36   25.50
  -1  -3  -3  389.56   26.20
   1   3   3  405.76   33.90
   1   3   3  385.96   38.10
  -1   3  -3  392.46   34.50
  -1   3  -3  421.56   34.40
   1   3   3  401.86   30.80
  -1   3  -3  432.36   35.30
  -3  -3  -3  401.26   28.80
   3  -3   3  401.66   27.40
   3  -3   3  392.26   24.10
   3  -3   3  384.26   31.20
  -3  -3  -3  370.16   22.10
   3  -3   3  388.96   22.20
  -3  -3  -3  361.96   21.10
  -3  -3  -3  397.26   23.60
   3   3   3  392.76   38.70
  -3   3  -3  353.56   34.00
  -3   3  -3  348.67   33.60
  -3   3  -3  390.36   32.50
   3   3   3  376.36   34.00
   5  -3   3  470.25   33.00
  -5  -3  -3  447.06   25.60
  -5  -3  -3  469.65   34.00
   5  -3   3  489.35   38.60
  -5  -3  -3  470.85   27.40
   5  -3   3  455.85   28.70
  -5   3  -3  433.06   39.30
   5   3   3  439.56   43.40
   5   3   3  463.05   39.40
   5   3   3  492.25   42.60
  -5   3  -3  438.46   35.50
  -5   3  -3  485.25   41.30
   7  -3   3   79.89   12.10
   7  -3   3   93.49   10.00
  -7  -3  -3   74.59    5.80
  -7  -3  -3   83.59    6.70
   7  -3   3   72.29    5.70
  -7  -3  -3   81.79    8.10
   7  -3   3   80.59   15.50
  -7  -3  -3   86.09   12.20
  -7   3  -3  100.39   14.70
   7   3   3   64.09   18.60
   7   3   3  116.09   18.40
   7   3   3   72.09   20.60
  -7   3  -3   82.49   16.50
  -9  -3  -3  169.58    9.70
  -9  -3  -3  158.28   18.20
   9  -3   3  150.88   15.50
   9  -3   3  134.79   11.00
   9  -3   3  163.68   10.20
  -9  -3  -3  154.48   13.40
  -9  -3  -3  177.58   11.10
   9  -3   3  117.79   21.60
   9  -3   3  152.48   18.90
   9   3   3  109.89   21.30
   9   3   3  120.99   30.90
  -9   3  -3  140.99   22.20
  -9   3  -3  155.78   25.00
   9   3   3  133.89   27.80
 -11  -3  -3  127.89   10.40
  11  -3   3  131.69    9.70
  11  -3   3  119.29    8.40
  11  -3   3  136.99   16.60
 -11  -3  -3  125.19   16.60
  11  -3   3  152.28   25.50
  11  -3   3  149.09   17.60
 -11  -3  -3  134.59   10.30
 -11  -3  -3  121.29   10.60
 -11  -3  -3  107.99   13.00
  11  -3   3  122.39   16.50
 -11   3  -3  127.59   19.30
 -11   3  -3  125.49   14.70
  11   3   3  135.59    9.70
  11   3   3  138.69   29.10
 -11   3  -3   88.99   31.30
  11   3   3  164.08   35.30
  11   3   3  134.89   21.80
 -11   3  -3  111.59   12.70
  11   3   3  147.69   17.00
 -11   3  -3  145.69   17.50
 -11   3  -3  148.29   27.20
 -11   3  -3  132.99   22.70
  11   3   3  143.29   14.20
 -13  -3  -3  197.38   20.40
 -13  -3  -3  208.88   23.30
  13  -3   3  216.78   14.90
 -13  -3  -3  236.58   14.00
 -13  -3  -3  217.58   13.60
  13  -3   3  242.18   16.00
  13  -3   3  181.78   25.20
 -13  -3  -3  241.58   15.60
 -13  -3  -3  238.48   16.80
  13  -3   3  222.58   25.10
  13   3   3  210.68   30.80
  13   3   3  237.78   18.80
 -13   3  -3  223.88   18.30
  13   3   3  264.67   21.20
  13   3   3  188.98   44.50
 -13   3  -3  165.38   32.30
  13   3   3  247.18   13.60
 -13   3  -3  209.48   17.60
 -13   3  -3  238.48   23.60
 -13   3  -3  220.08   13.50
  13   3   3  206.88   38.90
  13   3   3  254.87   24.00
 -13   3  -3  249.48   15.20
 -13   3  -3  237.08   19.50
 -13   3  -3  212.88   31.80
 -13   3  -3  229.58   51.39
 -13   3  -3  207.68   19.00
  15  -3   3   34.00    4.60
 -15  -3  -3   44.10    5.00
  15  -3   3   45.20    6.10
 -15  -3  -3   50.19    6.10
  15  -3   3   44.30    4.70
 -15  -3  -3   39.10    4.20
  15  -3   3   24.80    9.70
 -15  -3  -3   39.20    5.00
 -15  -3  -3   33.40   10.00
  15   3   3   40.50   10.10
  15   3   3   41.00    8.20
 -15   3  -3   26.80   13.20
  15   3   3   64.19   30.60
 -15   3  -3   20.80   16.40
  15   3   3   47.00    4.40
 -15   3  -3   45.50    4.30
 -15   3  -3   41.30    5.20
 -15   3  -3   36.30    7.40
 -15   3  -3   37.40    9.60
 -15   3  -3   24.00    8.00
 -15   3  -3   31.60    8.00
  15   3   3   43.30    7.80
  15   3   3   15.40   15.30
 -15   3  -3  138.99   78.09
 -15   3  -3   36.20    8.60
  15   3   3   44.00   21.00
 -17  -3  -3   20.60   10.70
  17  -3   3   24.50   12.50
 -17  -3  -3   28.30    6.30
  17  -3   3   33.00    6.10
 -17  -3  -3   33.30    3.90
 -17  -3  -3   26.30    5.50
  17  -3   3   30.70    4.10
  17  -3   3   27.10    4.80
 -17   3  -3   21.80    6.80
  17   3   3   44.20   26.30
 -17   3  -3   27.20    4.60
  17   3   3   27.00    7.80
 -17   3  -3   23.80    6.50
 -17   3  -3   34.80    8.30
 -17   3  -3   20.10    8.80
 -17   3  -3   25.90    8.00
 -17   3  -3   18.00   12.80
  17   3   3   31.30    3.90
 -17   3  -3   30.00    3.70
 -17   3  -3   26.30   18.60
  17   3   3   31.00    9.30
  17   3   3   32.10    7.10
 -19  -3  -3   38.70   19.60
 -19  -3  -3   79.79    6.80
 -19  -3  -3   69.99    6.90
 -19  -3  -3   73.29    8.20
  19  -3   3   76.59    6.80
  19  -3   3   56.99   20.10
 -19  -3  -3   70.89    7.70
  19  -3   3   83.79    7.60
 -19  -3  -3   43.90   19.00
  19  -3   3   90.79    9.90
  19   3   3   69.29   46.90
 -19   3  -3   94.39   11.40
  19   3   3   90.59    7.00
  19   3   3  100.09   57.79
 -19   3  -3   84.99   15.00
 -19   3  -3   85.19    7.20
 -19   3  -3   81.09   11.10
  19   3   3   75.39   10.50
 -19   3  -3  102.39   13.10
  19   3   3   84.69   14.50
 -19   3  -3   68.79    6.40
 -19   3  -3   92.79   12.60
  19   3   3   80.19   11.80
 -19   3  -3  106.69   42.60
 -21  -3  -3   35.70    4.40
  21  -3   3   35.90    5.00
 -21  -3  -3   34.70    4.80
  21  -3   3   45.20    7.80
 -21  -3  -3   23.60    6.20
  21  -3   3   37.50    4.70
 -21  -3  -3   20.30    8.60
 -21  -3  -3   32.60    5.50
 -21   3  -3   42.50    6.70
  21   3   3   28.30    7.40
  21   3   3   33.00    9.20
 -21   3  -3   19.70    7.80
 -21   3  -3   41.30    7.80
  21   3   3   52.29   68.09
 -21   3  -3   38.60    4.70
 -21   3  -3   46.90    8.20
 -21   3  -3   36.00    9.80
  21   3   3   39.30    7.50
  23  -3   3    6.60    3.50
  23  -3   3    3.80    2.10
 -23  -3  -3    4.40    2.00
  23  -3   3    2.30    2.00
 -23  -3  -3    4.20    2.10
 -23  -3  -3   -1.60    5.00
 -23  -3  -3    6.70    2.30
 -23  -3  -3    6.00    3.00
 -23   3  -3    2.30    2.90
 -23   3  -3    5.50    2.20
 -23   3  -3    1.80    3.50
  23   3   3    6.20    3.80
 -23   3  -3    8.10    3.80
  23   3   3    0.50    3.10
  23   3   3    3.30    4.80
 -23   3  -3    3.30    3.00
 -23   3  -3    7.30    3.90
  23   3   3    3.20    3.00
  25  -3   3    6.90    3.20
 -25  -3  -3   11.40    2.20
  25  -3   3    9.90    4.00
 -25  -3  -3   15.90    3.80
  25  -3   3   18.80    3.40
 -25   3  -3   18.40    4.50
  25   3   3   15.70    5.80
  25   3   3    7.60    3.50
  25   3   3   12.10    3.60
 -25   3  -3    5.90    4.90
 -25   3  -3   13.70    4.50
 -25   3  -3   12.80    5.10
 -25   3  -3   13.50    3.80
  25   3   3   12.20    4.60
  27  -3   3    1.30    1.40
  27  -3   3    0.90    1.60
 -27  -3  -3    1.50    1.50
  27  -3   3    2.00    1.40
 -27  -3  -3    1.60    2.80
 -27   3  -3   -1.40    1.80
 -27   3  -3    2.60    2.90
  27   3   3    2.50    1.90
 -27   3  -3    3.40    2.80
 -27   3  -3    2.00    2.50
  26  -4  -3    1.80    1.70
 -26  -4   3    1.40    1.40
 -26  -4   3    1.00    1.20
 -26  -4   3    0.60    1.20
 -26   4   3    0.80    1.00
 -26   4   3    4.00    2.70
  26   4  -3    1.90    2.20
  26   4  -3    1.40    2.00
 -26   4   3    4.00    2.50
  26   4  -3   -0.40    2.00
 -26   4   3    1.50    2.10
  26   4  -3    1.80    2.80
  24  -4  -3   12.90    4.50
 -24  -4   3   24.40    4.30
  24  -4  -3   20.20    3.70
 -24  -4   3   11.70    4.90
  24  -4  -3   22.40    2.90
 -24  -4   3   16.50    3.00
 -24  -4   3   23.10    3.80
 -24   4   3   15.00    5.40
 -24   4   3   19.00    5.50
  24   4  -3   15.40    5.70
 -24   4   3   26.70    8.50
  24   4  -3   11.80    5.60
 -24   4   3   18.80    3.70
 -24   4   3   22.40    3.00
  24   4  -3   21.60    8.40
  22  -4  -3   14.80    4.80
  22  -4  -3   30.00    6.00
  22  -4  -3   26.20    3.40
 -22  -4   3   23.70    3.90
 -22  -4   3   24.80    3.80
  22  -4  -3   28.10    3.70
 -22  -4   3   24.30    3.30
  22   4  -3   22.40    7.30
 -22   4   3   22.10    7.00
 -22   4   3   17.50    5.60
  22   4  -3   31.00    6.40
  22   4  -3   24.30    3.20
 -22   4   3   25.70    3.50
 -22   4   3   13.90    8.50
 -22   4   3   18.30    7.20
 -22   4   3   16.10    4.70
 -22   4   3   22.80    3.60
 -20  -4   3   11.90    4.70
  20  -4  -3    5.20    2.70
 -20  -4   3    9.80    2.60
  20  -4  -3   11.40    3.00
 -20  -4   3    7.90    3.10
 -20  -4   3   10.90    3.00
  20  -4  -3    4.30    2.60
  20   4  -3    7.10    2.20
 -20   4   3    1.00    6.10
 -20   4   3    0.20    3.60
 -20   4   3    6.40    2.50
 -20   4   3   13.60    4.90
  20   4  -3    2.80    4.70
 -20   4   3    7.30    5.00
  20   4  -3    5.30    4.50
  20   4  -3  -66.59   77.79
  20   4  -3   14.30    5.80
 -20   4   3    3.60    3.90
  18  -4  -3   33.80    3.90
 -18  -4   3   30.30   13.50
 -18  -4   3   40.10    4.10
 -18  -4   3   42.30    4.80
  18  -4  -3   43.00    6.50
 -18  -4   3   37.20    6.10
  18  -4  -3    7.90   14.60
  18  -4  -3   46.70    4.90
 -18  -4   3   42.20   15.30
  18   4  -3   40.60    4.20
  18   4  -3   32.10    7.50
 -18   4   3   39.00   10.70
  18   4  -3   37.50    4.00
 -18   4   3   28.40   10.60
  18   4  -3   28.90    7.70
  18   4  -3   20.90    8.20
 -18   4   3   38.50    4.50
 -18   4   3   21.80    8.20
  18   4  -3   46.40    9.50
  18   4  -3   -4.10   22.20
  18   4  -3   28.00   10.00
  18   4  -3  -10.70   34.90
 -18   4   3   46.70    8.60
 -18   4   3   18.30   24.90
 -18   4   3   20.50   12.00
 -18   4   3   45.90    5.70
  16  -4  -3   22.30    3.80
 -16  -4   3   22.30    3.30
 -16  -4   3   24.20    4.00
  16  -4  -3   27.00    5.00
 -16  -4   3   27.30    5.40
 -16   4   3   21.70    5.50
 -16   4   3   11.00    5.10
  16   4  -3   26.80    3.10
 -16   4   3   23.40   12.50
  16   4  -3   20.10    3.10
 -16   4   3   26.70    3.90
  16   4  -3   11.40    5.80
 -16   4   3   20.30    7.80
 -16   4   3   17.70    7.30
  16   4  -3   42.10   32.50
 -16   4   3   17.00   18.50
  16   4  -3   28.70   18.60
  16   4  -3   13.70    6.30
  16   4  -3   18.80    7.10
 -14  -4   3   93.69    7.10
  14  -4  -3   97.19    6.90
 -14  -4   3  101.79    7.90
  14  -4  -3   79.69   15.90
 -14  -4   3   86.49    8.50
 -14  -4   3   71.39   12.10
  14  -4  -3   83.49    8.00
  14   4  -3  117.29   17.10
 -14   4   3   85.09   16.80
 -14   4   3   88.49    7.10
  14   4  -3   46.70   28.30
 -14   4   3   77.49   21.10
  14   4  -3   68.89   12.90
  14   4  -3   91.69    6.70
  14   4  -3   70.99   12.30
 -14   4   3   82.69   27.10
 -14   4   3   76.79   17.50
 -14   4   3   94.69   14.70
  14   4  -3   82.69   11.00
  14   4  -3   85.49    6.40
 -14   4   3   95.89    9.90
 -14   4   3  116.79   13.00
  14   4  -3   88.09   12.50
 -12  -4   3  358.86   20.00
 -12  -4   3  334.87   26.90
  12  -4  -3  344.17   20.00
 -12  -4   3  381.66   22.70
  12  -4  -3  371.46   21.30
  12   4  -3  346.57   20.20
  12   4  -3  338.87   29.40
  12   4  -3  334.47   26.50
 -12   4   3  384.56   47.70
 -12   4   3  387.86   30.80
  12   4  -3  276.07   46.50
  12   4  -3  371.26   26.90
 -12   4   3  435.66   50.89
  12   4  -3  330.07   24.80
  12   4  -3  365.56   29.40
 -12   4   3  319.57   31.40
 -12   4   3  346.27   24.70
 -12   4   3  356.06   24.40
 -12   4   3  343.97   21.00
 -12   4   3  338.27   26.40
 -12   4   3  401.46   27.40
  12   4  -3  363.66   20.50
  10  -4  -3   35.70    7.90
 -10  -4   3   33.50    8.30
 -10  -4   3   47.40    4.20
 -10  -4   3   36.40    8.50
  10  -4  -3   36.00    4.20
  10   4  -3   52.59    8.80
 -10   4   3   28.20    8.30
  10   4  -3   37.10   10.20
 -10   4   3   24.00   12.70
 -10   4   3   49.10    5.30
  10   4  -3   26.70    9.60
 -10   4   3   39.40   11.90
 -10   4   3   29.70   12.40
 -10   4   3   17.50   12.80
  10   4  -3   14.50   16.20
  10   4  -3   38.90    4.20
  10   4  -3   50.59   17.80
  10   4  -3   39.90    4.20
 -10   4   3   35.70   10.40
 -10   4   3   27.70    6.90
 -10   4   3   37.20    5.30
 -10   4   3   39.20   10.90
  10   4  -3   57.79    8.90
  10   4  -3    8.50   16.30
   8  -4  -3  166.38   22.60
  -8  -4   3  149.79   15.80
  -8  -4   3  152.08   13.80
   8  -4  -3  173.68   15.50
   8  -4  -3  156.88   10.10
  -8  -4   3  149.79    9.90
  -8   4   3  143.49   11.80
   8   4  -3  133.89   13.60
   8   4  -3  168.38   14.00
   8   4  -3  154.58   15.60
  -8   4   3  130.79   21.90
  -8   4   3  207.58   36.50
  -8   4   3  129.49   16.10
  -8   4   3  159.98   12.50
   8   4  -3  171.68   14.60
   8   4  -3  154.98   10.60
  -8   4   3  139.69   25.40
   8   4  -3  126.79   32.30
  -8   4   3  135.09   11.10
   8   4  -3  168.48   28.70
  -8   4   3  146.49   25.80
  -8   4   3  170.58   13.90
  -8   4   3  161.48   16.80
   8   4  -3  144.29   20.60
   8   4  -3  151.78   16.10
   8   4  -3  172.58   11.00
   6  -4  -3   10.10    5.90
  -6  -4   3   23.30    3.80
  -6  -4   3   19.90    7.30
   6  -4  -3   22.50    6.90
   6  -4  -3   15.50    5.50
   6  -4  -3   23.00   10.30
  -6  -4   3   11.90    4.60
  -6   4   3   22.90    9.10
   6   4  -3   24.50    3.90
   6   4  -3   21.10    8.20
   6   4  -3   23.10   16.30
  -6   4   3   22.00   11.10
   6   4  -3   18.90   12.80
  -6   4   3   16.30    6.20
  -6   4   3   31.00    8.20
   6   4  -3   31.10    5.50
  -6   4   3   27.40    6.00
  -6   4   3   17.70    5.10
   6   4  -3   19.30   10.70
   6   4  -3   25.20    7.30
  -6   4   3   20.10   10.20
  -6   4   3   16.90    5.60
  -6   4   3   17.90   12.20
   6   4  -3   27.40    3.90
   4  -4  -3  321.87   20.10
  -4  -4   3  307.37   25.10
   4  -4  -3  275.67   16.50
   4  -4  -3  323.67   21.40
   4  -4  -3  265.97   32.10
   4  -4  -3  304.87   32.00
  -4  -4   3  321.27   23.60
   4   4  -3  287.37   18.60
  -4   4   3  280.87   20.00
   4   4  -3  345.87   22.60
   4   4  -3  306.97   37.50
   4   4  -3  287.67   21.00
  -4   4   3  323.47   21.80
   4   4  -3  313.97   36.10
  -4   4   3  269.87   28.70
  -4   4   3  309.27   38.10
   4   4  -3  296.97   35.30
   4   4  -3  296.67   19.10
  -4   4   3  325.77   34.40
  -4   4   3  328.77   21.00
   4   4  -3  294.07   23.70
  -4   4   3  245.78   18.80
   2  -4  -3   -0.60    6.90
  -2  -4   3    9.20    3.80
   2  -4  -3    6.60    7.60
  -2  -4   3    2.40    6.30
  -2  -4   3    2.20    3.20
   2  -4  -3    6.90    3.80
   2   4  -3   15.80    3.80
   2   4  -3    4.20    2.80
  -2   4   3    5.80    9.30
   2   4  -3   -1.30    6.40
   2   4  -3   -2.20    4.10
   2   4  -3   -4.20    8.40
  -2   4   3    4.30    7.80
  -2   4   3    1.60    3.60
  -2   4   3    2.60    4.90
  -2   4   3    9.00    7.20
   0  -4  -3   49.50   12.60
   0  -4   3   75.39   11.90
   0  -4  -3   58.49    9.40
   0  -4   3   50.19   11.00
   0  -4  -3   62.89   18.80
   0  -4  -3   59.29    4.60
   0  -4   3   35.40   12.10
   0   4  -3   49.20    9.20
   0   4   3   82.39   15.20
   0   4   3   62.79   18.20
   0   4   3   44.30   12.80
   0   4   3   51.59    7.40
   0   4  -3   58.59    7.10
   0   4  -3   86.89   18.20
   0   4  -3   68.69    8.80
   0   4   3   55.69    7.10
   0   4   3   49.30    8.60
   0   4  -3   65.29   15.20
   0   4  -3   42.00   14.80
   0   4  -3   61.99   17.20
   2  -4   3  304.57   29.50
   2  -4   3  306.47   23.90
  -2  -4  -3  271.57   33.10
  -2  -4  -3  331.87   18.90
   2  -4   3  286.17   23.00
   2  -4   3  350.86   30.20
  -2   4  -3  333.37   22.40
  -2   4  -3  417.36   39.40
  -2   4  -3  294.87   34.90
   2   4   3  345.37   22.60
  -2   4  -3  357.46   21.90
  -2   4  -3  358.96   25.40
  -2   4  -3  323.57   23.50
  -2   4  -3  358.76   35.80
   2   4   3  284.77   21.10
   2   4   3  337.67   23.50
   2   4   3  310.47   34.40
   2   4   3  323.07   40.70
   2   4   3  333.17   23.40
  -2   4  -3  386.96   22.70
  -4  -4  -3   22.40    5.80
  -4  -4  -3   19.40    8.00
   4  -4   3   10.70    5.70
   4  -4   3   15.50    6.70
   4  -4   3   13.50    9.10
  -4  -4  -3   17.30    3.40
   4   4   3   30.80    7.60
  -4   4  -3   18.20    5.50
  -4   4  -3    8.50   16.60
  -4   4  -3   21.60   11.10
   4   4   3    7.70    8.60
  -4   4  -3   30.90    5.10
   4   4   3   21.90    7.40
  -4   4  -3   23.90    5.00
   4   4   3    7.30    6.90
  -4   4  -3   22.80   11.60
   4   4   3   15.30   11.40
  -4   4  -3   21.40   10.20
  -6  -4  -3    5.80    3.60
   6  -4   3    8.70    9.60
  -6  -4  -3   11.60    3.30
  -6  -4  -3   -0.80    4.60
  -6   4  -3   12.80    4.60
  -6   4  -3    3.60    7.50
  -6   4  -3    8.70   10.20
   6   4   3    7.10    4.20
   6   4   3    4.60    4.20
  -6   4  -3   -0.80    4.30
  -6   4  -3   -2.20    3.00
  -6   4  -3    4.60    4.60
  -6   4  -3   14.60    4.10
  -6   4  -3   17.10    8.10
   6   4   3   15.90    6.00
  -6   4  -3    7.00    9.30
   6   4   3   27.20   14.70
   6   4   3    6.40    5.60
   6   4   3   10.40    4.80
  -6   4  -3    5.20    4.00
   6   4   3    3.40    1.40
   6   4   3    9.60    5.70
   6   4   3    7.60    8.40
  -6   4  -3    7.00    4.40
  -8  -4  -3   17.20    5.40
  -8  -4  -3   28.10    4.80
   8  -4   3    2.20   13.40
   8  -4   3   33.20   10.50
  -8  -4  -3   19.20    8.30
   8  -4   3   26.10    4.20
  -8   4  -3   34.70    5.50
  -8   4  -3   43.20   17.20
   8   4   3   29.80   16.50
   8   4   3   32.30    7.30
  -8   4  -3   44.60    9.30
  -8   4  -3   25.50   13.30
   8   4   3   42.00    8.10
  -8   4  -3   22.90    7.50
  -8   4  -3   29.60    6.40
   8   4   3   28.70    7.60
   8   4   3   29.70    3.20
   8   4   3    9.20    9.30
   8   4   3   28.00    7.10
  -8   4  -3   37.20    6.60
  -8   4  -3   23.60    8.20
   8   4   3   27.20   17.20
   8   4   3   26.90    8.80
 -10  -4  -3  119.39    8.20
 -10  -4  -3  128.89   10.30
 -10  -4  -3  101.69   16.80
  10  -4   3   76.89   20.90
 -10  -4  -3  127.89    8.60
  10  -4   3  117.49    9.30
 -10  -4  -3  111.09   14.90
 -10   4  -3  114.69    9.80
 -10   4  -3  121.09   24.20
 -10   4  -3  130.59   13.70
 -10   4  -3  132.39   12.30
  10   4   3  145.19   13.40
  10   4   3  104.99   15.50
 -10   4  -3   95.69   13.30
 -10   4  -3  131.89   27.50
  10   4   3  123.29    7.90
  10   4   3   92.89   34.10
 -10   4  -3  108.99   11.60
 -10   4  -3  115.39    8.10
 -10   4  -3  114.19   11.20
  10   4   3   95.59   31.40
  10   4   3  117.79   11.90
  10   4   3  126.09   13.10
 -10   4  -3  124.39   15.60
  10   4   3  108.69   13.80
  12  -4   3   52.59    6.00
 -12  -4  -3   48.00    6.40
  12  -4   3   49.00    4.90
 -12  -4  -3   37.00    4.40
 -12  -4  -3   37.10   14.20
 -12  -4  -3   39.80    5.30
 -12  -4  -3   48.90    5.10
  12   4   3   35.50    8.90
 -12   4  -3   28.10   16.70
 -12   4  -3   49.20    4.60
  12   4   3   49.60   10.90
 -12   4  -3   28.30    9.40
 -12   4  -3   48.40   11.20
  12   4   3   70.99   27.50
  12   4   3   38.70   10.50
  12   4   3   35.10    9.10
 -12   4  -3   37.60   20.40
 -12   4  -3   41.10   11.70
  12   4   3   35.10   23.80
  14  -4   3   38.50    6.00
 -14  -4  -3   31.90    4.90
  14  -4   3   38.20   15.00
 -14  -4  -3   41.40    6.50
 -14  -4  -3   37.70    5.70
  14  -4   3   37.60    4.50
 -14  -4  -3   34.40    4.20
 -14   4  -3   30.10    8.40
 -14   4  -3   41.50    5.40
  14   4   3   23.70    9.60
 -14   4  -3   27.30   12.40
  14   4   3   42.50   26.60
 -14   4  -3   25.90    6.80
  14   4   3   26.20    7.90
 -14   4  -3   30.40    8.40
  14   4   3   29.40    9.20
  14   4   3   35.90    3.90
 -14   4  -3   31.20    9.10
  14   4   3   62.79   40.80
 -14   4  -3   35.70    6.90
  14   4   3   34.20   21.90
 -14   4  -3   42.20    4.20
  14   4   3   28.00    8.40
 -14   4  -3    7.30   15.20
  16  -4   3   81.99    7.00
 -16  -4  -3   85.99    7.00
 -16  -4  -3   90.69    9.20
 -16  -4  -3   88.19    7.30
 -16  -4  -3   52.19   23.80
  16  -4   3   94.19    9.40
  16  -4   3   78.19   20.50
  16  -4   3   65.09    6.70
 -16  -4  -3   74.29    7.50
 -16  -4  -3   48.00   18.90
  16   4   3   67.19   11.80
 -16   4  -3   69.49   11.00
  16   4   3   94.79    6.50
  16   4   3   84.19   11.00
 -16   4  -3   67.39   16.50
  16   4   3   87.29   14.80
 -16   4  -3   66.59   14.00
 -16   4  -3   81.79   10.60
 -16   4  -3   72.29    6.10
  16   4   3   48.20   44.00
  16   4   3  149.39   51.79
 -16   4  -3   72.89   11.60
 -16   4  -3   68.39    9.90
 -16   4  -3   86.19    7.50
 -16   4  -3   62.19   25.70
 -18  -4  -3    3.90    2.60
 -18  -4  -3    1.20    1.50
  18  -4   3    4.30    2.10
 -18  -4  -3    5.10    2.60
 -18  -4  -3    1.90    2.20
  18  -4   3    1.40    2.40
  18   4   3    4.30    4.20
  18   4   3    3.00    2.40
 -18   4  -3    1.40    1.30
 -18   4  -3    4.20    3.70
 -18   4  -3    2.90    4.20
 -18   4  -3   -2.60    3.90
 -18   4  -3   -3.60    3.70
  18   4   3   -0.30    3.70
  18   4   3  122.69   75.49
 -18   4  -3    4.70    4.30
 -18   4  -3    1.70    5.20
  18   4   3   -0.90    3.70
 -20  -4  -3   17.40    3.30
 -20  -4  -3   11.40    4.20
  20  -4   3   20.70    3.30
 -20  -4  -3   15.60    4.30
  20  -4   3   14.10    4.70
  20  -4   3   22.30    6.20
  20   4   3   10.70    6.40
  20   4   3    8.00    4.70
 -20   4  -3   11.00    5.90
 -20   4  -3   15.70    3.10
 -20   4  -3   11.90    4.30
 -20   4  -3   22.50    6.20
 -20   4  -3   14.30    4.40
  20   4   3    7.10    4.80
 -20   4  -3   19.80    5.60
  20   4   3   14.70    5.40
 -20   4  -3   15.80    3.30
 -22  -4  -3   87.89    7.50
  22  -4   3   99.99   10.10
  22  -4   3   61.59    7.60
  22  -4   3   91.19    7.30
 -22  -4  -3   86.89    6.30
 -22  -4  -3   86.09    7.00
  22  -4   3   96.19    7.20
 -22  -4  -3   69.49    7.60
 -22   4  -3   69.79    8.50
 -22   4  -3   68.59   11.60
  22   4   3   72.39    9.70
  22   4   3   75.89    8.20
 -22   4  -3   84.39   10.20
 -22   4  -3   86.89    6.80
 -22   4  -3   82.99    9.40
 -24  -4  -3    9.60    2.10
 -24  -4  -3    6.10    2.50
  24  -4   3   12.40    3.90
 -24  -4  -3   19.90    6.20
  24  -4   3   10.00    2.40
 -24   4  -3    6.60    2.10
  24   4   3    9.70    3.80
 -24   4  -3   11.00    3.90
 -24   4  -3    8.10    3.10
 -26  -4  -3   24.60    3.20
  26  -4   3   14.70    3.40
 -26   4  -3   24.10    3.40
  26   4   3   22.00    3.90
  26   4   3   17.70    4.60
 -26   4  -3   23.20    2.50
  26   4   3   23.00    3.70
 -23  -5   3    8.50    2.80
 -23  -5   3    5.50    2.20
  23  -5  -3   14.90    3.10
  23  -5  -3    7.80    2.50
 -23   5   3    9.90    1.90
  23   5  -3    5.90    3.30
 -23   5   3    9.40    2.40
  23   5  -3   10.60    4.00
  23   5  -3   10.80    3.40
 -23   5   3    5.90    3.00
  21  -5  -3    5.60    2.20
 -21  -5   3   10.90    4.00
 -21  -5   3    0.90    1.60
  21  -5  -3    5.10    3.00
  21  -5  -3    8.60    2.80
 -21  -5   3    5.30    2.80
 -21  -5   3    3.60    1.60
  21   5  -3    3.60    3.60
  21   5  -3   -0.90    3.50
 -21   5   3    6.00    6.20
 -21   5   3    4.30    2.50
  21   5  -3    4.90    2.80
 -21   5   3    5.30    1.80
 -21   5   3    1.20    2.80
 -21   5   3    5.40    4.60
 -19  -5   3   10.70    2.60
 -19  -5   3   10.80    3.00
  19  -5  -3   11.30    2.90
  19  -5  -3   14.20    5.20
  19  -5  -3   17.40    3.40
 -19  -5   3   13.70    2.70
 -19   5   3   16.10    2.90
  19   5  -3    6.50    2.10
  19   5  -3    0.80    4.50
  19   5  -3    7.10    3.60
 -19   5   3    5.60    4.30
 -19   5   3   12.10    3.40
 -19   5   3    9.80    4.70
  19   5  -3    6.80    3.80
  19   5  -3   12.30    4.90
 -19   5   3    6.40    6.10
 -19   5   3   11.20    6.20
 -17  -5   3    4.90    2.60
  17  -5  -3    0.80    1.60
  17  -5  -3    4.50    2.70
 -17  -5   3    0.00    1.30
  17  -5  -3    4.60    1.80
 -17  -5   3    0.50    1.20
 -17  -5   3    1.10    1.40
 -17   5   3    2.10    2.00
 -17   5   3    2.00    1.40
  17   5  -3   -3.40    4.30
 -17   5   3    0.10    2.90
 -17   5   3  -10.40    7.50
  17   5  -3    3.10    1.40
 -17   5   3    5.30    4.30
  17   5  -3    3.60    3.80
 -17   5   3    4.20    4.10
 -17   5   3    2.70    6.10
  17   5  -3    5.20    3.60
  17   5  -3    2.80    1.40
  17   5  -3   -0.10    3.20
  15  -5  -3   87.59    6.80
 -15  -5   3   98.19    7.20
  15  -5  -3  101.29    8.30
 -15  -5   3   89.59    8.80
  15   5  -3   82.79   13.30
 -15   5   3   83.59    8.30
  15   5  -3   88.09   10.50
  15   5  -3   90.39    6.50
 -15   5   3   66.59   10.70
  15   5  -3   60.09   10.80
 -15   5   3   97.69   11.90
 -15   5   3   82.79   11.40
  15   5  -3   73.99   12.10
 -15   5   3   90.89   14.00
  15   5  -3   82.89   14.30
  15   5  -3   75.19    7.50
 -15   5   3   95.79   24.10
 -13  -5   3   19.20    3.10
  13  -5  -3   16.80    6.70
  13  -5  -3    9.50   14.90
  13  -5  -3   20.80    3.30
 -13  -5   3    4.00    8.60
  13   5  -3   22.20    2.90
  13   5  -3   18.10    7.20
  13   5  -3    6.00   24.00
 -13   5   3   21.70    5.30
 -13   5   3    6.70    9.70
 -13   5   3   19.50    3.50
  13   5  -3   25.10    7.80
 -13   5   3    8.90    6.30
  13   5  -3   34.40    8.50
  13   5  -3    5.80    6.90
  13   5  -3   18.80    2.90
 -13   5   3   14.30   22.50
  13   5  -3    8.70    4.80
 -11  -5   3  286.07   17.60
 -11  -5   3  308.47   18.10
  11  -5  -3  310.57   18.70
 -11  -5   3  321.47   20.30
 -11  -5   3  281.27   26.20
  11  -5  -3  255.77   19.30
  11  -5  -3  309.67   33.20
 -11   5   3  324.37   27.80
  11   5  -3  307.17   17.90
 -11   5   3  266.07   46.30
  11   5  -3  347.37   24.50
 -11   5   3  304.77   18.80
  11   5  -3  250.67   49.10
 -11   5   3  327.57   20.00
 -11   5   3  306.37   24.10
  11   5  -3  356.86   24.80
  11   5  -3  314.97   25.30
  11   5  -3  320.67   18.30
  11   5  -3  332.77   27.20
  11   5  -3  262.37   26.80
  11   5  -3  340.87   22.60
 -11   5   3  307.37   22.20
 -11   5   3  319.17   45.00
  -9  -5   3  155.98   17.60
   9  -5  -3  162.98   18.70
  -9  -5   3  175.78   13.00
   9  -5  -3  175.88   11.70
  -9  -5   3  168.98   11.20
   9   5  -3  182.78   18.10
  -9   5   3  172.98   12.50
  -9   5   3  176.48   15.70
   9   5  -3  190.98   16.50
  -9   5   3  191.38   13.60
  -9   5   3  177.98   35.50
   9   5  -3  179.78   16.20
   9   5  -3  221.58   41.40
   9   5  -3  177.98   11.50
  -9   5   3  131.29   16.70
  -9   5   3  129.19   31.80
  -9   5   3  148.99   33.50
  -9   5   3  185.48   18.70
   9   5  -3  176.28   15.00
   9   5  -3  191.08   11.90
   9   5  -3  176.88   18.20
  -7  -5   3  262.27   16.80
   7  -5  -3  278.77   26.80
  -7  -5   3  240.48   15.30
   7  -5  -3  256.77   15.80
  -7  -5   3  252.07   25.00
   7   5  -3  286.47   23.70
  -7   5   3  287.17   41.30
  -7   5   3  264.47   20.00
  -7   5   3  255.87   17.30
   7   5  -3  239.98   16.20
  -7   5   3  264.97   38.30
   7   5  -3  281.37   24.10
   7   5  -3  259.47   16.40
   7   5  -3  281.87   20.60
  -7   5   3  271.07   22.60
   7   5  -3  198.68   40.30
   7   5  -3  296.17   23.50
  -7   5   3  264.17   18.80
  -7   5   3  190.58   37.20
  -7   5   3  258.57   17.90
   7   5  -3  259.57   48.80
   5  -5  -3   52.99   12.10
  -5  -5   3   18.50    6.80
   5   5  -3   30.40    7.40
  -5   5   3    2.70   14.50
  -5   5   3   24.50    6.40
   5   5  -3   17.20    9.70
  -5   5   3   19.40   15.10
  -5   5   3   30.70    6.90
   5   5  -3   25.80    7.60
   5   5  -3   20.10    6.10
   5   5  -3   32.80    6.20
  -5   5   3   28.40    6.10
   5   5  -3   19.20   14.00
   5   5  -3   19.50    6.60
   5   5  -3   19.80    4.10
  -5   5   3   26.50    5.60
   5   5  -3   28.70    5.90
   5   5  -3   -1.20   15.30
  -5   5   3   31.00   14.00
  -3  -5   3   99.99   25.20
   3  -5  -3  108.99    8.90
   3  -5  -3  131.09   13.00
  -3  -5   3  105.09    9.90
   3  -5  -3  148.59   17.80
   3   5  -3  109.59   12.50
   3   5  -3  142.39   12.50
  -3   5   3  143.09   14.00
   3   5  -3  182.18   21.00
  -3   5   3  129.79   24.80
  -3   5   3  120.89   22.90
   3   5  -3  131.89   10.20
  -3   5   3  138.29   13.20
   3   5  -3  138.09   19.80
  -3   5   3  171.98   29.50
   3   5  -3  131.59   32.40
   3   5  -3  124.29   10.20
   3   5  -3  116.29   11.50
   3   5  -3  115.89   28.30
   3   5  -3  156.98   15.20
  -3   5   3  152.88   16.50
  -3   5   3  140.09   11.60
  -3   5   3  152.48   34.10
   1  -5  -3   12.40    7.00
   1  -5  -3   12.50    5.00
  -1  -5   3   14.70    6.90
   1  -5  -3   10.40    3.50
  -1   5   3    6.90    4.20
  -1   5   3    7.20    3.90
   1   5  -3   17.10    5.20
  -1   5   3    0.20    8.80
   1   5  -3    9.00    3.10
  -1   5   3   12.50    5.10
   1   5  -3   14.50    5.10
  -1   5   3    7.50    8.90
  -1   5   3    1.80   16.40
  -1   5   3    7.90   11.20
   1   5  -3    5.00    7.20
  -1   5   3   12.10    5.10
  -1   5   3    5.20    6.80
  -1   5   3   24.70    6.80
   1   5  -3   15.00    5.60
   1   5  -3   22.50    7.30
   1   5  -3    5.10    9.90
  -1   5   3   17.00    4.70
   1   5  -3   12.30    3.50
  -1  -5  -3   65.09   12.60
   1  -5   3   65.59   15.80
   1  -5   3   60.99   16.30
   1  -5   3   57.89   17.70
   1   5   3   47.40   17.60
  -1   5  -3   54.19    6.70
   1   5   3   62.19    7.80
   1   5   3   55.39    9.70
   1   5   3   48.40    9.00
  -1   5  -3   60.69   20.20
   1   5   3   49.99    9.10
  -1   5  -3   72.39   10.90
  -1   5  -3   53.19    6.70
   1   5   3   65.89    8.50
   1   5   3   66.19   17.00
  -1   5  -3   63.59    9.80
   1   5   3   55.69    9.40
   1   5   3   66.99   26.40
  -1   5  -3   34.40   13.30
  -1   5  -3   58.39   19.10
  -1   5  -3   45.30    8.50
  -1   5  -3   79.59   17.30
  -1   5  -3   58.99    7.00
  -1   5  -3   64.09    8.00
   1   5   3   55.99    7.50
   1   5   3   50.89    5.10
  -3  -5  -3   15.40    4.00
   3  -5   3    7.30    7.70
  -3  -5  -3    3.20    6.70
  -3   5  -3    6.90   10.60
   3   5   3   10.30    5.80
   3   5   3   26.80    8.80
  -3   5  -3   13.70    3.70
  -3   5  -3   23.90    5.30
  -3   5  -3   22.90    4.90
   3   5   3   39.50   16.80
   3   5   3   -0.10   16.60
   3   5   3   29.30    7.10
   3   5   3    8.50    4.80
  -3   5  -3   12.70   10.10
  -3   5  -3    8.40    8.00
  -3   5  -3   15.10    7.00
  -3   5  -3   62.39   22.40
   3   5   3   12.50   11.10
  -3   5  -3   14.70    4.40
   5  -5   3   36.50   11.70
  -5  -5  -3   42.30    5.30
  -5  -5  -3   31.60   12.10
  -5  -5  -3   31.70    4.50
  -5   5  -3   32.00    7.80
  -5   5  -3   23.20    6.40
   5   5   3    4.40   15.30
  -5   5  -3   26.70    6.00
   5   5   3   33.90    3.70
   5   5   3   18.60    7.30
   5   5   3   27.40   14.50
   5   5   3   33.80    8.00
  -5   5  -3   31.10    4.90
   5   5   3   22.60    8.40
  -5   5  -3   30.60    7.90
  -5   5  -3   47.90   18.30
  -5   5  -3   29.60   13.80
  -5   5  -3   40.10    5.80
   5   5   3   34.40    7.20
   5   5   3   31.70   10.30
  -5   5  -3   21.80   13.00
   5   5   3   42.90    7.30
  -7  -5  -3  191.08   12.70
   7  -5   3  108.29   26.10
  -7  -5  -3  165.48   10.70
  -7   5  -3  153.08   28.10
  -7   5  -3  159.68   12.40
   7   5   3  142.19   16.20
   7   5   3  133.69   32.30
  -7   5  -3  179.28   14.50
   7   5   3  142.89   16.50
  -7   5  -3  121.59   32.70
   7   5   3  150.78   17.90
   7   5   3  158.18   14.30
  -7   5  -3  164.08   13.30
   7   5   3  104.29   43.30
  -7   5  -3  155.78   12.40
  -7   5  -3  155.18   13.70
  -7   5  -3  148.19   11.50
   7   5   3  196.78   15.40
  -7   5  -3  154.48   17.70
   7   5   3  185.98   16.10
   7   5   3  193.88   15.30
   7   5   3  159.88   10.10
  -9  -5  -3  443.46   27.20
  -9  -5  -3  449.16   26.00
   9  -5   3  455.15   25.90
  -9  -5  -3  431.66   38.30
  -9  -5  -3  403.26   24.50
   9   5   3  437.16   24.00
   9   5   3  422.26   63.99
  -9   5  -3  415.36   51.79
  -9   5  -3  425.06   28.90
   9   5   3  416.86   29.50
   9   5   3  469.75   30.80
  -9   5  -3  386.86   24.10
   9   5   3  519.15   37.50
   9   5   3  446.06   29.70
  -9   5  -3  438.06   26.30
  -9   5  -3  458.55   28.00
  -9   5  -3  495.25   36.10
   9   5   3  332.57   48.00
   9   5   3  432.66   32.50
   9   5   3  414.26   28.40
   9   5   3  450.65   30.80
  -9   5  -3  452.85   26.40
  -9   5  -3  435.46   27.80
 -11  -5  -3   73.59    6.90
 -11  -5  -3   88.19    7.50
 -11  -5  -3   96.29    9.10
  11  -5   3   87.79    8.40
 -11   5  -3  105.99   33.30
  11   5   3   79.59   13.90
 -11   5  -3   76.39   10.00
  11   5   3   87.69   41.20
 -11   5  -3   83.39   14.10
  11   5   3  102.89   11.70
  11   5   3   88.59    6.40
  11   5   3   94.29   10.20
 -11   5  -3   91.09    6.60
  11   5   3   91.49   12.00
  11   5   3   54.99   13.00
 -11   5  -3   87.09    9.00
 -11   5  -3   80.69   20.20
 -11   5  -3   75.59   10.00
  11   5   3   37.10   23.30
 -11   5  -3   91.09    8.10
  11   5   3   90.49   11.60
 -13  -5  -3  174.18   13.40
  13  -5   3  134.19   11.10
 -13  -5  -3  166.88   11.50
  13  -5   3  164.08   12.70
 -13  -5  -3  166.78   11.60
  13   5   3  141.09   14.70
 -13   5  -3  171.48   11.70
  13   5   3  170.18   16.40
  13   5   3  151.38   15.30
 -13   5  -3  117.99   24.70
 -13   5  -3  148.49   14.30
  13   5   3  191.08   21.10
  13   5   3  162.18   10.10
 -13   5  -3  157.88   19.30
 -15  -5  -3    1.10    1.50
 -15  -5  -3    1.20    2.40
 -15  -5  -3    3.60    1.90
  15  -5   3    4.70    2.80
 -15   5  -3    2.60    1.80
 -15   5  -3    7.10    3.50
 -15   5  -3    5.80    5.00
  15   5   3    4.60    4.00
  15   5   3    3.00    3.40
 -15   5  -3    3.80    5.60
  15   5   3    0.30    1.20
  15   5   3    2.70    3.40
  15   5   3   -3.00    2.60
 -15   5  -3   -1.30    3.30
 -15   5  -3    1.60    1.50
  15   5   3    2.90    4.60
 -17  -5  -3    4.10    1.90
  17  -5   3    2.60    1.90
  17  -5   3   -3.20    2.90
  17  -5   3    0.10    2.70
 -17  -5  -3    3.40    2.30
 -17  -5  -3    0.20    1.50
 -17  -5  -3   -2.90    4.70
  17   5   3    1.90    3.50
 -17   5  -3    3.30    1.60
 -17   5  -3    4.80    4.30
  17   5   3    3.50    1.60
 -17   5  -3   14.10    4.90
  17   5   3    5.90    3.60
 -17   5  -3   -0.40    3.60
 -17   5  -3    4.40    3.80
 -17   5  -3    3.60    1.90
  17   5   3   -3.30    4.10
  17   5   3    1.90    3.80
  17   5   3    0.70    2.70
  19  -5   3   16.30    3.70
  19  -5   3   16.40    3.30
 -19  -5  -3   15.50    4.70
 -19  -5  -3   17.90    3.10
 -19  -5  -3   19.60    3.60
  19  -5   3   16.70    5.80
 -19   5  -3   12.70    5.50
  19   5   3    9.30    4.70
  19   5   3   15.80    4.80
 -19   5  -3   22.70    5.20
  19   5   3    7.50    4.20
  19   5   3   15.40    5.20
 -19   5  -3   16.30    3.00
  21  -5   3   10.30    3.10
  21  -5   3   18.70    2.80
 -21  -5  -3   14.80    2.50
 -21  -5  -3   11.80    2.80
  21  -5   3   19.00    6.50
 -21  -5  -3   11.60    2.70
 -21   5  -3   11.10    2.30
  21   5   3   12.10    4.60
 -21   5  -3    6.60    3.80
  21   5   3    4.00    3.80
  21   5   3   16.20    4.10
 -21   5  -3   11.30    4.20
 -23  -5  -3    9.10    2.50
  23  -5   3   11.80    3.10
  23  -5   3    8.90    2.20
  23   5   3    4.80    2.90
  23   5   3    5.80    3.30
 -23   5  -3    8.90    1.70
  23   5   3    2.50    2.90
 -23   5  -3    3.90    2.80
 -23   5  -3    5.80    2.00
 -20  -6   3    1.80    1.10
 -20  -6   3    2.10    1.60
  20   6  -3    2.50    0.90
 -20   6   3    2.20    2.00
 -20   6   3    1.00    1.00
 -20   6   3    0.50    0.80
  20   6  -3   -1.40    1.90
 -20   6   3    1.40    3.10
 -18  -6   3    3.40    1.30
 -18  -6   3    4.10    1.50
 -18  -6   3   -3.30    2.70
  18   6  -3    2.40    0.90
 -18   6   3    2.90    1.50
  18   6  -3    3.10    2.30
  18   6  -3    1.50    2.40
 -18   6   3    1.20    3.30
 -18   6   3    2.50    1.30
  16  -6  -3    2.10    1.80
 -16  -6   3   -0.50    1.20
 -16  -6   3    0.20    2.30
  16  -6  -3    1.00    3.20
  16   6  -3    1.00    1.00
  16   6  -3   -2.30    2.70
 -16   6   3   -1.40    2.70
  16   6  -3    3.00    3.30
 -16   6   3   -2.00    4.60
  16   6  -3    1.00    3.00
  16   6  -3    3.60    2.90
 -16   6   3    2.40    1.70
 -16   6   3    1.00    1.20
  14  -6  -3   17.40    4.10
 -14  -6   3   17.50    3.60
 -14  -6   3   23.20    4.70
 -14  -6   3   13.40    3.20
 -14  -6   3   12.90    3.60
  14   6  -3   19.90    3.80
  14   6  -3   21.30    2.60
 -14   6   3    4.70    6.20
  14   6  -3   20.30    6.10
  14   6  -3   18.80    5.60
  14   6  -3    9.90    4.60
 -14   6   3   15.60    2.90
 -14   6   3   21.80    4.10
  14   6  -3   18.80    5.80
 -14   6   3   12.30    5.60
 -12  -6   3   59.09    4.90
  12  -6  -3   51.19    6.50
 -12  -6   3   52.69    6.60
 -12  -6   3   58.39    5.30
 -12  -6   3   49.30    6.30
 -12   6   3   62.89    5.30
 -12   6   3   62.49    7.10
 -12   6   3   60.59    9.80
  12   6  -3   60.59    8.40
  12   6  -3   58.59    8.60
  12   6  -3   47.10    7.90
  12   6  -3   54.49    4.40
  12   6  -3   52.89    9.00
 -12   6   3   59.49   17.40
  12   6  -3   57.59    4.60
 -10  -6   3   19.50    5.10
  10   6  -3   19.50    2.90
  10   6  -3   16.20    6.50
  10   6  -3   30.30    6.80
  10   6  -3   20.30    6.30
 -10   6   3   22.40    3.40
  10   6  -3   19.40    2.60
  -8  -6   3   40.90    5.80
  -8  -6   3   41.30    5.00
  -8   6   3   44.10    7.50
   8   6  -3   35.80    7.40
   8   6  -3   47.00    8.10
  -8   6   3   44.70    5.90
  -8   6   3   32.80   14.70
   8   6  -3   46.90    9.50
  -8   6   3   41.60    8.50
  -8   6   3   40.40    5.00
   8   6  -3   44.30    4.00
  -6  -6   3   15.40    3.20
   6   6  -3   19.70    3.60
   6   6  -3   15.00    6.10
  -6   6   3   23.00    6.30
  -6   6   3    9.30   11.40
   6   6  -3   17.00    4.20
  -6   6   3   20.70    4.90
  -6   6   3   11.20    5.40
   6   6  -3   13.30    5.60
  -6   6   3   20.60    9.70
   6   6  -3    3.60    5.50
  -4  -6   3   32.10    6.10
   4   6  -3   29.60    4.10
   4   6  -3   43.10    9.10
   4   6  -3   11.60   23.70
   4   6  -3   29.70    7.00
  -4   6   3   36.10    6.40
  -4   6   3   31.90    7.70
  -4   6   3   26.50    5.40
  -4   6   3   26.00    5.80
  -4   6   3   33.20    5.30
  -4   6   3    6.50   24.70
   4   6  -3   38.60    4.60
   2   6  -3   41.90    7.00
  -2   6   3   41.10    6.00
  -2   6   3   30.80    7.70
   2   6  -3   30.70    4.60
   2   6  -3   42.90    9.30
  -2   6   3   35.50    6.40
   2   6  -3   21.70   30.50
   2   6  -3   26.20    6.20
   2   6  -3   37.10    6.80
  -2   6   3   36.50    6.60
   2   6  -3   33.00    4.90
  -2   6   3   45.10   25.50
  -2   6   3   34.80    6.30
   0  -6  -3   38.50   11.20
   0  -6  -3    8.70    2.80
   0  -6  -3   26.10   17.20
   0   6  -3   39.20   27.20
   0   6   3    2.70    7.10
   0   6  -3   24.10    5.60
   0   6   3   17.80    5.80
   0   6  -3   14.20    4.60
   0   6  -3    0.20    6.60
   0   6   3   15.80   21.30
   0   6  -3   13.10   14.50
   0   6   3   16.30    4.80
   0   6  -3   17.80    5.20
   0   6   3    6.40   10.20
   0   6  -3   21.70    6.90
   0   6  -3   10.30    3.90
   0   6   3   13.20    5.90
   0   6  -3   11.80    3.80
  -2  -6  -3   48.70    5.60
  -2  -6  -3   35.30   10.80
  -2   6  -3   41.70    5.50
   2   6   3   49.10    6.90
  -2   6  -3   36.90   12.00
  -2   6  -3   29.80    7.00
  -2   6  -3   36.90    8.60
   2   6   3   49.00   13.80
   2   6   3   48.60    8.20
  -2   6  -3   43.90    6.40
  -2   6  -3   45.30    8.10
   2   6   3   52.49    8.30
   2   6   3   38.20    8.60
  -2   6  -3   42.30    5.90
  -4  -6  -3    3.20    6.90
  -4  -6  -3   19.30    4.50
  -4  -6  -3   11.60    4.50
  -4   6  -3   10.80    4.80
  -4   6  -3    5.30    3.60
   4   6   3   20.10    6.70
  -4   6  -3    0.60    6.40
  -4   6  -3   16.60    5.60
  -4   6  -3   11.10    4.30
   4   6   3    3.20    3.60
  -4   6  -3   21.10    4.70
   4   6   3    1.60    7.30
   4   6   3   16.50    5.00
  -6  -6  -3    4.10    2.00
  -6  -6  -3    0.80    5.30
  -6  -6  -3   -1.30    1.90
  -6   6  -3    4.80    2.50
  -6   6  -3    0.80    3.20
   6   6   3    0.90    4.20
   6   6   3    2.80    3.10
  -6   6  -3    4.80    5.80
  -6   6  -3    3.20    3.20
  -6   6  -3    1.30    2.40
   6   6   3   -0.80    1.10
   6   6   3    1.30    4.90
  -6   6  -3   -0.80    2.20
   6   6   3    2.50    3.20
  -8  -6  -3   27.20    5.00
  -8  -6  -3   11.40    6.90
  -8  -6  -3   16.30    4.70
  -8  -6  -3   17.70    4.30
  -8   6  -3   18.90    3.90
   8   6   3   15.70    2.60
   8   6   3   21.30    7.20
  -8   6  -3   11.00    9.90
  -8   6  -3   26.00    5.00
   8   6   3   29.80    6.50
  -8   6  -3   30.10    5.50
  -8   6  -3   10.50    5.10
  -8   6  -3   21.10    5.70
   8   6   3   33.90    7.00
   8   6   3   22.30    5.80
 -10  -6  -3   76.49    8.90
 -10  -6  -3   99.09    7.60
 -10  -6  -3   84.79    7.30
 -10  -6  -3   77.79   13.60
  10   6   3   97.89   10.30
 -10   6  -3   92.49    8.50
  10   6   3   80.99   12.90
 -10   6  -3   86.79    7.20
 -10   6  -3  104.89   19.30
  10   6   3   85.29   10.70
  10   6   3   89.39    6.20
 -10   6  -3   93.39    9.40
 -10   6  -3  100.49   13.30
 -12  -6  -3   11.80    9.60
  12  -6   3    9.90    8.10
 -12  -6  -3    4.20    2.90
 -12  -6  -3    9.30    3.10
  12   6   3    7.70    5.40
 -12   6  -3    4.40    5.40
  12   6   3   10.40    4.40
 -12   6  -3    2.80    3.60
 -12   6  -3    5.50    3.20
 -12   6  -3   -3.00    2.80
 -12   6  -3    8.30    2.80
  12   6   3    3.90    3.70
 -14  -6  -3    4.70    1.70
 -14  -6  -3    7.20    2.90
  14  -6   3    4.50    4.90
 -14  -6  -3    4.10    2.60
 -14   6  -3    4.00    1.90
  14   6   3    6.90    3.30
 -14   6  -3    0.40    4.40
  14   6   3    1.20    4.20
  14   6   3    6.70    2.20
 -14   6  -3    4.00    3.90
 -14   6  -3   13.10    5.20
  14   6   3    7.10    3.40
 -16  -6  -3    8.50    2.70
 -16  -6  -3   11.50    2.40
 -16  -6  -3    6.40    3.10
 -16  -6  -3   13.90    3.10
  16  -6   3   19.10    6.20
 -16   6  -3   12.10    4.40
  16   6   3   10.80    3.60
  16   6   3    8.70    3.70
 -16   6  -3    9.70    2.20
 -16   6  -3    7.20    3.90
  16   6   3    9.50    4.40
 -18  -6  -3   -0.60    1.20
 -18  -6  -3    1.80    1.20
 -18  -6  -3    0.80    1.50
 -18   6  -3    2.10    1.90
  18   6   3    3.70    3.50
 -18   6  -3   -0.60    2.60
  18   6   3    3.20    2.20
  18   6   3    0.60    2.40
 -18   6  -3    3.80    1.40
  15   7  -3    6.10    2.10
  15   7  -3    9.30    1.30
 -15   7   3    7.70    1.50
 -13  -7   3   20.70    4.20
 -13  -7   3    8.30    2.30
  13   7  -3    8.00    2.90
  13   7  -3   10.90    3.20
 -13   7   3    7.20    3.00
 -13   7   3   14.80    6.50
 -13   7   3    9.20    1.90
  13   7  -3   12.60    1.60
 -13   7   3   11.80    1.60
  11   7  -3   24.10    6.20
  11   7  -3   28.60    4.80
  11   7  -3   25.20    2.40
 -11   7   3   22.10    4.90
 -11   7   3   23.80    3.30
 -11   7   3   27.10    3.10
  -9   7   3    3.50    2.30
  -9   7   3    1.70    1.70
  -9   7   3    2.00    1.10
   9   7  -3    2.00    1.00
   9   7  -3    3.60    2.80
  -9   7   3   -2.90    3.80
   9   7  -3    3.40    3.10
   7   7  -3   -1.80    3.30
  -7   7   3    3.70    2.30
  -7   7   3   -0.40    2.00
   7   7  -3    2.90    2.70
  -7   7   3    2.50    1.30
   7   7  -3    2.40    1.10
   7   7  -3    8.00    2.80
  -7   7   3    1.60    7.20
   5   7  -3   28.30    6.50
  -5   7   3   21.80    5.10
   5   7  -3   25.90    5.20
  -5   7   3   24.70    4.90
   5   7  -3   26.80    3.10
   5   7  -3   32.70    3.60
  -5   7   3   24.70    4.00
  -3   7   3    2.00    5.10
   3   7  -3    2.60    3.20
   3   7  -3    8.30    3.30
  -3   7   3   13.60    3.00
  -3   7   3   11.70    3.70
  -3   7   3    8.40    3.10
   3   7  -3    7.20    2.20
  -1   7   3    5.90    2.70
   1   7  -3    9.10    3.20
  -1   7   3    6.40    2.30
   1   7  -3    8.30    3.80
  -1   7   3    1.10    3.10
  -1   7   3    3.60    3.40
   1   7  -3    9.30    2.30
   1   7  -3    5.40    1.60
  -1   7  -3   13.20    2.70
   1   7   3   14.90    4.30
  -1   7  -3   19.60    5.50
  -1   7  -3   13.70    3.10
  -1   7  -3   16.90    3.80
   1   7   3   12.40    4.10
   1   7   3   18.30    4.00
   3   7   3   62.89    6.60
  -3   7  -3   63.29    8.00
  -3   7  -3   56.89    5.80
  -3   7  -3   63.19    5.50
  -3   7  -3   57.29    7.00
   3   7   3   58.39    7.10
   3   7   3   37.00    9.60
  -3   7  -3   57.59    4.80
  -5  -7  -3   19.10    4.80
   5   7   3    9.80    3.70
  -5   7  -3   14.60    3.70
  -5   7  -3   17.70    4.80
  -5   7  -3   12.90    2.70
   5   7   3   13.60    4.70
   7   7   3   -0.30    2.70
  -7   7  -3   -0.10    4.90
  -7   7  -3   -0.80    1.70
   7   7   3    3.50    2.30
  -7   7  -3    1.90    1.90
  -9  -7  -3    2.40    2.00
  -9  -7  -3   15.30    4.00
  -9   7  -3   11.00    2.40
   9   7   3    5.00    2.50
   9   7   3    7.60    3.00
  -9   7  -3    7.10    3.20
  -9   7  -3    3.20    1.60
 -11  -7  -3    2.90    2.20
  11   7   3    3.70    2.30
 -11   7  -3    3.10    2.30
  11   7   3    6.50    3.00
 -11   7  -3    2.40    1.70
 -13  -7  -3    1.60    1.30
  13   7   3    2.70    2.10
 -13   7  -3    0.30    1.70
  13   7   3    3.00    1.80
  30   0  -4    0.10    2.10
  30   0  -4    0.40    1.50
 -30   0   4    2.10    1.70
 -30   0   4    0.80    2.20
 -30   0   4    0.80    2.10
  28   0  -4   29.50    7.70
 -28   0   4   25.50    5.60
 -28   0   4   26.50    4.90
  28   0  -4   21.10    5.70
  28   0  -4   19.90    4.50
 -28   0   4   22.90    6.50
  26   0  -4    4.10    3.70
 -26   0   4   10.70    4.60
 -26   0   4   15.20    4.30
 -26   0   4   12.40    4.80
  26   0  -4    7.20    2.30
  26   0  -4    9.70    4.60
  26   0  -4    8.70    3.20
 -24   0   4   18.70    4.90
  24   0  -4   11.10    4.90
  24   0  -4    7.40   12.70
 -24   0   4   10.20    5.10
  24   0  -4   17.80    5.80
  24   0  -4   11.30    2.90
 -24   0   4   19.50    6.20
 -24   0   4   17.70   14.50
  22   0  -4   20.80   10.70
 -22   0   4   43.70    5.80
  22   0  -4   41.30    7.00
 -22   0   4   40.60    7.20
 -22   0   4   57.49    8.90
  22   0  -4   37.90   14.20
  22   0  -4   31.80    7.00
  22   0  -4   46.00    7.70
  22   0  -4   30.10    8.00
  22   0  -4   42.80    4.20
 -20   0   4    2.20    4.70
 -20   0   4   19.20    5.20
  20   0  -4   14.20    2.80
  20   0  -4    3.50    7.00
  20   0  -4   10.40    2.90
  20   0  -4   19.50    5.80
 -20   0   4   10.50    3.60
  20   0  -4   13.30    4.20
 -20   0   4   11.40    3.40
  20   0  -4   10.90    4.50
 -20   0   4    9.50    7.10
  20   0  -4   26.10   17.90
  18   0  -4   38.20   45.20
 -18   0   4   12.00    9.00
 -18   0   4    9.80    8.30
  18   0  -4   10.60    4.30
  18   0  -4   -1.90   17.60
 -18   0   4   13.50    3.60
 -18   0   4   16.10    4.80
 -18   0   4   11.00    4.80
 -18   0   4   21.70    8.20
  18   0  -4   32.20    8.90
 -18   0   4    3.30    5.80
  18   0  -4    7.20    6.20
 -16   0   4   65.19   13.00
 -16   0   4   60.19    6.10
  16   0  -4   76.19   11.60
 -16   0   4   76.39    7.70
  16   0  -4   84.29    7.50
  16   0  -4  100.19   11.20
  16   0  -4   73.89   14.20
  16   0  -4    9.00   31.50
  16   0  -4   80.69    5.90
 -16   0   4   83.59   10.10
 -16   0   4   64.99    7.10
 -16   0   4   79.49    5.70
  16   0  -4   72.89    5.60
 -14   0   4   91.39    9.40
  14   0  -4   72.09    9.40
 -14   0   4   80.49    5.50
 -14   0   4   70.79    6.90
  14   0  -4   75.59    5.70
 -14   0   4   87.09   14.80
  14   0  -4   43.30   22.20
  14   0  -4   76.39   12.30
  14   0  -4   85.49    7.10
  12   0  -4    9.10    3.50
  12   0  -4   23.70   16.30
  12   0  -4    9.90    2.60
  12   0  -4    6.60    3.40
  10   0  -4   53.49    6.00
 -10   0   4   49.30   11.10
  10   0  -4   46.80   18.80
  10   0  -4   47.10    7.90
  10   0  -4   46.50    4.50
 -10   0   4   39.50    4.30
 -10   0   4   41.30    7.10
  10   0  -4   47.80    7.50
 -10   0   4   52.09    5.70
   8   0  -4   28.10   16.10
   8   0  -4   18.00    4.20
   8   0  -4   17.20    4.90
   8   0  -4   30.00    5.40
  -8   0   4   16.40    3.20
   8   0  -4   20.50    2.70
   6   0  -4   17.90    4.10
   6   0  -4   28.80    9.00
  -6   0   4   20.50    5.20
  -6   0   4   22.90    3.70
   6   0  -4   18.50    3.30
  -6   0   4   22.40    3.40
   6   0  -4   12.50    4.50
   6   0  -4   22.80    4.00
   4   0  -4  155.48   20.80
   4   0  -4  153.28   10.90
   4   0  -4  167.48   10.70
  -4   0   4  167.88   13.50
   4   0  -4  163.68   12.00
  -4   0   4  171.18   11.60
   4   0  -4  171.88   13.70
  -4   0   4  160.48   11.40
   4   0  -4  159.68   12.30
   2   0  -4  775.22   41.40
  -2   0   4  798.32   42.90
  -2   0   4  822.52   44.30
  -2   0   4  647.34   42.90
   2   0  -4  775.42   43.10
   2   0  -4  836.02   43.00
   2   0  -4  778.82   44.20
   2   0  -4  733.93   52.39
   2   0  -4  781.12   41.50
   0   0   4   41.80    4.90
   0   0  -4   39.40    4.50
   0   0  -4   36.20    5.20
   0   0  -4   44.60    3.90
   0   0   4   30.80    4.90
   0   0   4   33.20    4.60
  -2   0  -4   17.20    4.70
   2   0   4   22.00    3.90
   2   0   4   21.00    4.00
  -2   0  -4   25.20    2.90
  -2   0  -4   20.30    3.30
   2   0   4   21.20    8.60
  -2   0  -4   16.60    3.00
  -4   0  -4   31.60    5.90
  -4   0  -4   30.00    5.30
   4   0   4   45.00    5.70
  -4   0  -4   42.90    4.90
  -4   0  -4   37.70    5.50
   4   0   4   24.60   13.20
  -4   0  -4   37.30    3.80
   4   0   4   35.20    5.90
  -6   0  -4  200.48   13.40
  -6   0  -4  177.88   13.80
   6   0   4  191.58   28.00
  -6   0  -4  182.18   11.80
   6   0   4  197.88   15.00
   6   0   4  198.98   16.50
  -6   0  -4  162.68   14.80
   6   0   4  159.58   11.50
  -6   0  -4  178.68   16.70
   8   0   4   20.90    6.60
   8   0   4   23.60    5.50
   8   0   4   26.00   14.90
  -8   0  -4   24.80    4.60
  -8   0  -4   24.10    3.70
  -8   0  -4   24.30    5.30
  -8   0  -4   26.60    5.80
   8   0   4   26.70    4.00
  10   0   4   13.30    3.50
 -10   0  -4   11.10    3.30
  10   0   4    4.00    4.10
 -10   0  -4    5.80    3.10
 -10   0  -4   19.00    3.70
  10   0   4   13.70    5.60
  10   0   4   41.20   20.30
  10   0   4   14.00    2.80
 -10   0  -4    8.00    3.50
  12   0   4    4.10    1.90
 -12   0  -4    2.60    2.70
 -12   0  -4    1.00    2.10
 -12   0  -4    1.70    2.90
  12   0   4    4.50    4.30
  12   0   4   24.80   28.10
  12   0   4   -0.40    3.50
 -12   0  -4    1.60    2.10
  14   0   4   32.50   10.40
 -14   0  -4   36.00    8.70
  14   0   4   52.19    6.30
 -14   0  -4   35.70    6.70
  14   0   4   35.20   14.40
 -14   0  -4   28.00   10.10
 -14   0  -4   51.29    8.20
  14   0   4   29.20   38.30
 -14   0  -4   39.90    6.40
  16   0   4   78.49    8.70
  16   0   4   65.59    8.40
 -16   0  -4   80.59    6.70
  16   0   4   48.90   12.50
  16   0   4   81.89    6.70
  16   0   4   53.19   21.10
 -16   0  -4   61.69   14.40
 -16   0  -4   59.29   12.20
  16   0   4   83.49    6.90
 -16   0  -4   74.79    8.20
  16   0   4   44.20   52.39
 -16   0  -4   61.29   10.20
  18   0   4    9.10    2.80
 -18   0  -4    8.70    5.60
  18   0   4   21.60    6.10
 -18   0  -4   20.90   11.30
 -18   0  -4   14.60    3.50
  18   0   4   17.50    4.60
 -18   0  -4    6.70    2.90
  18   0   4   12.90    7.00
  18   0   4   15.10    3.20
 -18   0  -4   -0.90    5.50
 -18   0  -4    5.70    3.10
 -18   0  -4   23.10    6.60
  18   0   4    9.00    4.70
  20   0   4   27.90    6.50
 -20   0  -4   34.30    4.80
  20   0   4   25.80    4.10
 -20   0  -4   31.40    6.40
  20   0   4   34.00   15.10
  20   0   4   27.00    4.90
 -20   0  -4   34.10    5.20
  20   0   4   29.80    7.70
 -20   0  -4   35.20    7.90
  20   0   4   22.00    7.50
 -20   0  -4   14.10   18.30
  22   0   4   72.59   24.10
  22   0   4   62.79    5.70
 -22   0  -4   77.09   10.60
 -22   0  -4   55.59    7.20
 -22   0  -4   66.49    8.90
 -22   0  -4   38.70   26.20
  22   0   4   46.50    6.10
  22   0   4   51.29    8.50
  22   0   4   53.29   10.30
 -24   0  -4    3.00    3.90
 -24   0  -4    3.80    2.80
  24   0   4    1.30    2.60
  24   0   4   -2.10    3.10
 -24   0  -4    2.80    2.80
  24   0   4    2.40    1.40
 -26   0  -4    4.90    3.00
 -26   0  -4   -0.10    2.30
  26   0   4    0.50    2.20
  26   0   4   -0.10    2.60
 -26   0  -4    4.30    3.10
  26   0   4    3.00    2.50
 -26   0  -4    2.80    3.30
 -28   0  -4    3.00    3.00
 -28   0  -4    0.70    2.40
  28   0   4    1.40    1.80
  28   0   4    2.30    2.90
 -28   0  -4    0.50    2.00
  28   0   4   -0.20    1.70
  30   0   4    1.30    1.40
 -30   0  -4    5.10    1.80
 -30   0  -4    2.50    1.60
 -31  -1   4    0.80    1.50
  31  -1  -4    0.80    1.40
 -31  -1   4    3.70    1.80
  31  -1  -4    2.00    1.70
  31   1  -4    0.90    1.80
  31   1  -4    3.90    2.10
 -31   1   4    5.50    2.70
 -31   1   4    1.20    2.60
 -31   1   4    4.20    1.90
 -29  -1   4    2.10    2.10
  29  -1  -4    2.50    1.70
 -29  -1   4    4.50    2.60
  29  -1  -4    7.20    2.80
  29  -1  -4    4.10    2.80
 -29   1   4    8.10    4.40
  29   1  -4    4.70    4.10
 -29   1   4    3.10    2.40
  29   1  -4    3.20    2.40
  29   1  -4    5.30    3.40
 -29   1   4    2.20    3.00
 -29   1   4    4.10    2.80
  27  -1  -4   17.00    5.60
 -27  -1   4   13.50    5.00
  27  -1  -4   24.60    3.10
 -27  -1   4   28.60    4.40
  27  -1  -4   17.60    4.10
  27  -1  -4   32.00    6.50
 -27   1   4   20.60    5.90
  27   1  -4   24.20    6.70
 -27   1   4   10.40    4.80
 -27   1   4   18.10    4.50
 -27   1   4   20.70    6.00
  27   1  -4   11.90    4.50
 -25  -1   4   39.10    7.20
  25  -1  -4   45.50    7.70
  25  -1  -4   41.30    4.10
  25  -1  -4   41.20    7.40
  25  -1  -4   41.90    4.80
  25  -1  -4   53.39   10.40
 -25  -1   4   31.90    5.40
 -25  -1   4   17.30    8.30
  25   1  -4   31.60    7.90
 -25   1   4   33.00    7.50
 -25   1   4   32.50    8.70
 -25   1   4   40.90    5.10
  25   1  -4   52.49    7.10
 -25   1   4   33.60    6.00
  25   1  -4   26.80    5.50
 -23  -1   4   14.30    4.40
 -23  -1   4    9.80    2.90
  23  -1  -4    8.90   20.90
  23  -1  -4    9.40    3.90
 -23  -1   4    9.10    3.90
  23  -1  -4   29.10   13.10
 -23  -1   4    5.20    8.30
  23  -1  -4   15.40    3.30
  23  -1  -4    7.90    3.90
  23  -1  -4   22.60    6.50
 -23  -1   4    4.00    5.40
  23   1  -4    3.30    3.00
 -23   1   4   16.10    4.90
  23   1  -4    7.00    4.10
 -23   1   4    9.50    4.90
 -23   1   4   18.50   13.10
  23   1  -4   26.10   16.20
 -23   1   4   17.80    3.60
  23   1  -4   20.10    6.60
 -23   1   4    6.10   24.80
 -23   1   4    7.50    3.60
 -21  -1   4  104.49   10.40
  21  -1  -4  107.69   10.50
 -21  -1   4   94.29   17.00
 -21  -1   4  111.89   14.50
  21  -1  -4  128.49    8.70
  21  -1  -4  103.59   16.90
 -21  -1   4  124.39    8.90
  21  -1  -4   75.79   17.90
 -21  -1   4  116.09    7.40
 -21  -1   4  117.09    8.30
  21  -1  -4   88.89    9.80
  21  -1  -4  114.49   11.40
  21   1  -4  109.89    7.80
  21   1  -4  101.49   10.40
 -21   1   4  105.69    9.70
 -21   1   4   84.09   11.80
  21   1  -4  104.09   19.40
  21   1  -4   99.99   12.50
 -21   1   4   66.19   21.60
 -21   1   4  101.09   11.30
  21   1  -4  106.39   20.90
  19  -1  -4   21.60    8.80
 -19  -1   4   21.10    3.40
 -19  -1   4   18.40    3.90
  19  -1  -4   28.10    3.70
 -19  -1   4   24.40    2.90
 -19  -1   4   19.40    5.80
  19  -1  -4   31.20    5.70
 -19  -1   4   18.50    9.20
 -19  -1   4   26.40    9.20
  19  -1  -4   26.70    3.30
  19  -1  -4   34.60    5.40
 -19  -1   4   25.20    5.20
  19  -1  -4   31.90   12.10
  19   1  -4   22.80    6.00
  19   1  -4   25.00   10.70
  19   1  -4   22.00    3.40
 -19   1   4   27.80    6.20
  19   1  -4   32.70    6.60
  19   1  -4  -68.09   47.70
 -19   1   4   23.80    3.80
 -19   1   4   35.20    7.50
 -19   1   4   27.30    5.00
 -19   1   4   27.90    3.90
  19   1  -4   18.30    3.20
  19   1  -4   19.60    6.60
 -19   1   4   30.90   13.20
 -19   1   4   15.10   10.70
 -17  -1   4   42.70    7.90
  17  -1  -4   47.60   12.80
 -17  -1   4   43.80    5.60
 -17  -1   4   34.60    3.80
 -17  -1   4   39.40    5.30
 -17  -1   4   18.40    8.20
  17  -1  -4   50.79    8.20
  17  -1  -4   22.70   14.80
 -17  -1   4   26.20   11.10
 -17   1   4   25.60    5.40
  17   1  -4   39.20    6.70
 -17   1   4   35.80    6.50
  17   1  -4   25.60   15.30
 -17   1   4   32.20    8.30
  17   1  -4   40.20    8.00
 -17   1   4   24.70    4.30
  17   1  -4   34.50    9.90
  17   1  -4   29.80    3.50
  17   1  -4   24.40    9.00
  17   1  -4   33.00    4.70
  17   1  -4   -0.80   24.80
  15  -1  -4   67.19    9.00
  15  -1  -4   77.89   11.10
 -15  -1   4   57.19    6.80
 -15  -1   4   75.99    9.60
 -15  -1   4   70.09    5.40
 -15  -1   4   82.69    7.10
  15  -1  -4   79.29    6.80
  15  -1  -4   81.69    5.70
 -15  -1   4   73.59   13.90
  15   1  -4   69.59    8.40
  15   1  -4   35.60   24.70
  15   1  -4   78.29   15.20
  15   1  -4   64.09   17.40
 -15   1   4   76.59   11.40
  15   1  -4   57.89    9.70
  15   1  -4   59.99    6.40
 -15   1   4   73.59   14.40
  15   1  -4   79.89   12.00
  13  -1  -4   23.30    3.40
  13  -1  -4  117.19   49.30
  13  -1  -4   27.20    5.10
 -13  -1   4   25.90    3.90
  13  -1  -4   16.10    7.50
  13  -1  -4   20.70    2.70
 -13  -1   4   19.00    6.50
 -13  -1   4   28.40    5.30
  13   1  -4   11.70    6.80
  13   1  -4   22.90    5.60
  13   1  -4   16.20    5.90
  13   1  -4   12.80   13.70
  13   1  -4   11.60    6.80
  13   1  -4   25.60    6.40
  11  -1  -4  775.62   43.50
 -11  -1   4  761.32   43.90
 -11  -1   4  731.93   42.70
  11  -1  -4  878.51   46.40
 -11  -1   4  858.51   48.80
  11  -1  -4  852.21   47.40
 -11  -1   4  902.61   47.80
  11  -1  -4  754.52   74.09
  11  -1  -4  878.51   50.59
  11   1  -4  669.83   49.00
 -11   1   4  848.72   53.19
  11   1  -4  819.02   70.99
 -11   1   4  917.01   47.90
  11   1  -4  812.52   46.80
  11   1  -4  752.52   53.09
  11   1  -4  860.61   49.30
  -9  -1   4   35.70    7.50
   9  -1  -4   31.10    5.50
  -9  -1   4   43.40    6.00
   9  -1  -4   40.70    5.20
   9  -1  -4   69.09   26.70
  -9  -1   4   42.00    5.90
   9  -1  -4   38.00    3.80
   9  -1  -4   39.30    6.70
   9   1  -4   46.60   12.80
   9   1  -4   41.50    6.10
   9   1  -4   55.69    7.90
  -9   1   4   53.19    5.70
  -9   1   4   49.10    7.80
   9   1  -4   46.20    7.40
  -9   1   4   66.79   13.90
   7  -1  -4  118.39   11.30
  -7  -1   4  103.59    9.70
   7  -1  -4   97.09    8.80
   7  -1  -4  100.29    7.60
  -7  -1   4   89.99    9.80
   7  -1  -4  158.08   45.40
   7  -1  -4   99.79    9.00
  -7   1   4  100.59   10.20
   7   1  -4   93.89   18.20
  -7   1   4  103.59   14.40
   7   1  -4  119.39    9.40
   7   1  -4  103.29   10.00
  -7   1   4   96.99   11.70
  -7   1   4   97.79    7.60
  -5  -1   4  329.27   21.50
   5  -1  -4  315.67   31.90
   5  -1  -4  320.67   23.20
   5  -1  -4  312.17   18.90
   5  -1  -4  319.57   20.60
  -5  -1   4  322.67   20.80
  -5  -1   4  328.57   22.10
   5  -1  -4  316.97   19.80
   5   1  -4  336.07   31.00
  -5   1   4  353.26   21.20
   5   1  -4  318.77   19.80
   5   1  -4  328.17   21.70
  -5   1   4  349.17   18.40
   5   1  -4  334.87   20.80
   5   1  -4  339.37   22.80
  -5   1   4  318.97   24.30
  -3  -1   4 1184.18   63.39
   3  -1  -4 1238.78   68.09
   3  -1  -4 1053.39   76.19
   3  -1  -4 1204.28   63.89
  -3  -1   4 1116.39   65.09
   3  -1  -4 1182.18   62.99
   3  -1  -4 1135.39   68.29
  -3  -1   4 1230.68   66.39
   3   1  -4 1249.68   66.19
   3   1  -4 1245.88   63.09
   3   1  -4 1320.37   66.49
   3   1  -4 1262.87   63.29
  -3   1   4 1231.28   63.69
  -3   1   4 1254.97   61.39
  -3   1   4 1155.98   69.19
   3   1  -4 1136.59   74.89
  -1  -1   4 2765.02  146.09
   1  -1  -4 2781.62  141.89
   1  -1  -4 2638.74  157.58
  -1  -1   4 2758.92  145.09
  -1  -1   4 2765.92  140.99
   1  -1  -4 2888.41  143.09
   1  -1  -4 2985.80  146.19
  -1  -1   4 2438.46  142.29
   1   1  -4 2550.64  154.78
   1   1  -4 2592.64  152.58
   1   1  -4 2900.21  144.29
  -1   1   4 2767.42  141.49
   1   1  -4 2895.21  146.59
   1   1  -4 2863.31  146.89
  -1   1   4 2831.32  144.99
   1   1  -4 2944.81  146.09
   1   1  -4 2667.43  140.89
   1  -1   4 2033.10  107.19
  -1  -1  -4 1987.40  107.09
  -1  -1  -4 2046.60  109.19
  -1  -1  -4 2068.39  106.19
   1  -1   4 2148.58  110.19
   1   1   4 1999.40  118.99
  -1   1  -4 1971.60  110.09
  -1   1  -4 2224.28  107.39
   1   1   4 1898.21  109.19
  -1   1  -4 2133.59  109.59
   1   1   4 1970.20  105.09
   1   1   4 2029.00  108.49
   1   1   4 2194.78  109.39
  -1   1  -4 2170.98  111.59
  -1   1  -4 1856.41  119.29
  -3  -1  -4  390.16   23.40
  -3  -1  -4  309.77   25.70
   3  -1   4  386.86   23.60
  -3  -1  -4  354.26   22.50
   3  -1   4  421.06   27.30
  -3   1  -4  347.67   23.40
  -3   1  -4  376.16   23.80
  -3   1  -4  366.86   26.50
   3   1   4  363.46   33.30
   3   1   4  380.46   24.20
   3   1   4  410.46   25.30
  -3   1  -4  390.86   22.20
  -3   1  -4  368.46   21.50
  -3   1  -4  370.66   26.90
   3   1   4  396.76   24.30
  -5  -1  -4  533.85   33.60
  -5  -1  -4  558.34   34.90
   5  -1   4  597.34   35.00
  -5  -1  -4  533.05   30.70
  -5  -1  -4  552.44   33.60
   5  -1   4  585.24   38.10
   5  -1   4  516.45   30.60
  -5   1  -4  612.84   33.80
   5   1   4  619.94   35.80
  -5   1  -4  638.54   35.90
   5   1   4  568.94   48.10
  -5   1  -4  595.74   38.60
   5   1   4  555.64   34.40
   5   1   4  613.94   35.20
  -5   1  -4  468.15   42.30
  -5   1  -4  574.24   33.40
  -5   1  -4  536.45   38.60
  -7  -1  -4    0.70    2.70
  -7  -1  -4    4.30    3.20
   7  -1   4    8.30    2.30
  -7  -1  -4    4.20    2.70
   7  -1   4    2.50    2.30
   7  -1   4    4.70    3.50
   7  -1   4   10.70    3.60
   7  -1   4   24.10   20.60
   7   1   4    4.80    2.80
  -7   1  -4    5.90    2.70
  -7   1  -4    2.70    2.60
  -7   1  -4    4.10    3.60
  -7   1  -4    9.80    3.80
   7   1   4   -2.30    7.00
   7   1   4    2.90    2.80
   7   1   4    5.70    3.50
  -9  -1  -4  991.40   56.69
   9  -1   4  998.60   52.99
   9  -1   4  990.80   55.29
  -9  -1  -4  968.40   52.69
  -9  -1  -4  932.11   57.69
   9  -1   4  927.61   59.69
   9  -1   4 1061.29   59.39
   9  -1   4  985.00   63.69
   9   1   4  917.21   79.49
  -9   1  -4  896.81   62.09
   9   1   4  899.81   53.49
  -9   1  -4 1036.80   52.49
  -9   1  -4 1029.00   55.29
  -9   1  -4  943.41   59.29
   9   1   4 1014.70   58.39
   9   1   4 1041.60   59.29
   9   1   4 1077.29   59.59
  11  -1   4   68.29   10.40
  11  -1   4   54.59   11.20
 -11  -1  -4   65.29    6.30
 -11  -1  -4   70.09   10.40
 -11  -1  -4   63.79    5.30
 -11  -1  -4   58.89    8.30
  11  -1   4   68.89    6.70
  11  -1   4   72.59    6.80
  11  -1   4   68.99   13.40
  11   1   4   73.79   12.30
  11   1   4   60.49   10.20
  11   1   4   75.29   27.20
 -11   1  -4   76.09    8.40
 -11   1  -4   51.49   12.60
  11   1   4   74.69    7.90
  11   1   4   59.79   10.10
 -13  -1  -4   83.19    6.30
 -13  -1  -4   88.09    7.50
  13  -1   4   67.19   15.50
 -13  -1  -4   98.99   13.30
  13  -1   4   83.89   12.00
  13  -1   4   87.59    8.30
  13  -1   4   88.69   14.80
  13  -1   4   94.39    7.00
 -13  -1  -4   92.69   10.90
 -13   1  -4  115.79   17.90
 -13   1  -4   67.89    9.70
  13   1   4   76.89   13.20
  13   1   4   62.39   15.50
  13   1   4   82.59    7.30
  13   1   4  102.79    9.60
  13   1   4   61.79   13.50
  15  -1   4  116.79   10.50
  15  -1   4  121.39   15.80
 -15  -1  -4  113.39   16.90
  15  -1   4  110.59    8.40
 -15  -1  -4  113.29    7.90
 -15  -1  -4  101.09    8.90
  15  -1   4   95.29    9.80
  15  -1   4  132.19   26.00
  15  -1   4  120.99   15.70
 -15  -1  -4  111.59   12.90
 -15   1  -4  101.39    8.30
  15   1   4  118.69   12.00
  15   1   4   82.19   37.40
  15   1   4   97.19   14.50
 -15   1  -4  116.39   16.00
 -15   1  -4  117.09   12.30
  15   1   4  122.79   16.70
 -15   1  -4  121.59   12.00
 -15   1  -4  117.69    8.80
  15   1   4  124.09   20.70
  15   1   4   97.79   11.50
  15   1   4  108.49    8.30
  15   1   4  103.39    8.70
 -15   1  -4  106.09   19.90
 -17  -1  -4   12.30    4.50
  17  -1   4    6.00    3.30
  17  -1   4   12.50    5.00
  17  -1   4    1.00    5.40
 -17  -1  -4    6.70    3.10
 -17  -1  -4    8.20    2.30
  17  -1   4    9.20    3.30
 -17  -1  -4   13.10    7.50
 -17  -1  -4   15.70    6.30
 -17  -1  -4   14.00    2.90
  17  -1   4   15.10    2.90
 -17  -1  -4    7.60    5.20
 -17   1  -4   19.60    7.20
  17   1   4   54.19   38.60
  17   1   4    9.20    3.20
 -17   1  -4   11.60    4.10
 -17   1  -4    6.20    4.30
  17   1   4    6.50    3.60
  17   1   4    8.90    7.50
  17   1   4   11.90    2.90
  17   1   4    2.10    5.80
  17   1   4   11.20    6.00
 -17   1  -4   10.80    4.50
 -17   1  -4    5.80    2.50
  19  -1   4  261.07   20.50
  19  -1   4  288.67   24.00
 -19  -1  -4  287.37   19.70
  19  -1   4  277.07   17.70
 -19  -1  -4  257.47   17.10
 -19  -1  -4  290.07   18.60
 -19  -1  -4  276.77   32.80
  19  -1   4  275.97   18.10
  19  -1   4  316.97   21.60
 -19  -1  -4  312.67   17.70
 -19  -1  -4  253.17   22.20
  19  -1   4  237.78   28.20
  19   1   4  264.67   20.20
  19   1   4  304.67   23.30
 -19   1  -4  294.27   22.70
 -19   1  -4  308.97   18.10
 -19   1  -4  287.07   21.10
  19   1   4  228.48   31.10
  19   1   4  229.38   81.89
 -19   1  -4  293.57   20.10
  19   1   4  330.17   27.90
 -19   1  -4  326.87   25.00
 -19   1  -4  333.27   53.59
 -21  -1  -4  130.29   26.50
 -21  -1  -4  125.99   12.90
  21  -1   4   97.69   11.60
  21  -1   4  109.79    8.80
 -21  -1  -4   97.49    7.50
 -21  -1  -4  111.39   10.90
  21  -1   4  133.49   12.80
 -21  -1  -4  108.69    9.60
  21  -1   4  118.59   14.50
  21  -1   4  111.79    9.40
 -21   1  -4  122.29   39.50
 -21   1  -4  112.99   13.10
  21   1   4  118.59   16.70
  21   1   4  111.09   12.30
  21   1   4  122.09   12.70
  21   1   4  124.89   13.70
 -21   1  -4  114.19   11.40
  21   1   4   99.89    7.80
 -21   1  -4  112.49   12.00
 -21   1  -4  122.19   16.60
 -21   1  -4  111.79    9.00
  21   1   4   66.89   22.00
 -23  -1  -4  163.38   12.90
  23  -1   4  145.49   16.60
 -23  -1  -4  144.39   15.30
  23  -1   4  135.09   14.20
  23  -1   4  160.68   14.00
  23  -1   4  149.29   11.60
  23  -1   4  172.08   18.30
 -23  -1  -4  166.48   14.30
  23   1   4  137.99   18.20
 -23   1  -4  166.98   12.20
  23   1   4  153.38   19.70
 -23   1  -4  163.98   17.40
 -23   1  -4  183.78   19.30
 -23   1  -4  163.98   19.40
  23   1   4  136.59   14.30
  25  -1   4    2.80    3.60
  25  -1   4    4.70    6.30
  25  -1   4    2.30    2.20
  25  -1   4    3.50    2.10
 -25  -1  -4    5.10    4.20
 -25  -1  -4    0.50    2.00
 -25  -1  -4    2.60    2.40
 -25   1  -4    0.50    2.60
 -25   1  -4    1.50    3.10
  25   1   4    1.30    2.70
 -25   1  -4    2.30    3.20
  25   1   4   -0.40    2.80
  25   1   4    2.60    2.50
  27  -1   4    3.80    2.60
 -27  -1  -4    0.90    3.00
  27  -1   4    6.80    2.00
  27  -1   4    3.20    3.60
  27  -1   4    8.40    4.00
 -27  -1  -4    5.10    4.40
 -27  -1  -4    5.10    2.60
 -27  -1  -4    1.10    3.00
  27   1   4    7.80    4.00
 -27   1  -4    6.70    3.50
 -27   1  -4    7.80    3.50
 -27   1  -4    1.10    3.00
  27   1   4    1.00    2.10
  27   1   4    4.70    3.30
  29  -1   4    2.40    2.10
 -29  -1  -4    8.10    3.20
 -29  -1  -4    0.30    3.70
 -29  -1  -4   -0.60    1.90
  29  -1   4    2.10    1.80
 -29   1  -4    2.90    2.90
 -29   1  -4    7.60    3.00
 -29   1  -4    4.90    2.40
 -29   1  -4    4.10    2.00
 -29   1  -4    2.70    2.70
  29   1   4    4.90    2.60
  29   1   4    1.20    1.90
  30  -2  -4    3.60    1.40
  30  -2  -4    0.20    2.10
 -30  -2   4    3.00    1.60
  30  -2  -4    1.70    1.30
 -30   2   4    0.10    2.10
 -30   2   4    9.60    3.40
  30   2  -4    0.70    1.80
  30   2  -4    3.70    2.40
 -30   2   4    4.00    2.20
  28  -2  -4    2.20    1.80
  28  -2  -4    2.50    1.30
 -28  -2   4   -0.10    2.90
  28  -2  -4    0.80    1.70
  28  -2  -4    2.00    2.20
 -28  -2   4    1.70    1.80
 -28   2   4    0.90    2.70
  28   2  -4    0.30    2.10
 -28   2   4    3.80    2.50
  28   2  -4    1.40    2.30
 -28   2   4   -1.80    2.20
  26  -2  -4   26.30    3.70
  26  -2  -4   27.20    3.30
  26  -2  -4   23.50    5.60
 -26  -2   4   28.30    4.60
 -26  -2   4   21.10    5.10
  26   2  -4   30.80    5.60
 -26   2   4   13.40    6.10
 -26   2   4   24.20    6.70
 -26   2   4   20.30    6.00
  26   2  -4   30.10    7.70
 -26   2   4   24.00    4.70
 -24  -2   4   67.59    9.20
 -24  -2   4   67.69    5.50
 -24  -2   4   70.49    7.10
 -24  -2   4   69.49    8.80
  24  -2  -4   71.19    6.00
  24  -2  -4   75.09    8.90
  24  -2  -4   77.69    9.50
  24  -2  -4   72.19    6.60
 -24   2   4   80.49    7.00
 -24   2   4   67.89   13.00
  24   2  -4   74.79    8.90
 -24   2   4   69.09    9.40
 -24   2   4   69.79    6.10
 -24   2   4   72.09   10.90
  24   2  -4   79.89   12.70
 -24   2   4   63.09    8.20
  22  -2  -4   43.40    7.00
 -22  -2   4   39.80    4.70
  22  -2  -4   43.10    4.70
  22  -2  -4   51.49   15.90
 -22  -2   4   26.00    8.70
  22  -2  -4   40.80   16.20
 -22  -2   4   42.90    6.90
 -22  -2   4   45.20    5.30
  22  -2  -4   42.40    5.00
  22  -2  -4   46.90    8.00
 -22  -2   4   46.80    4.40
 -22   2   4   54.19    8.80
  22   2  -4   52.19    8.70
  22   2  -4   11.90   28.90
  22   2  -4   49.20   10.10
  22   2  -4   47.60    4.70
 -22   2   4   31.10    7.60
 -22   2   4   44.20    5.30
 -22   2   4   48.00    4.80
 -22   2   4   47.10   10.90
 -22   2   4   40.70   26.50
  22   2  -4   37.60    7.30
  22   2  -4   33.40    7.90
 -22   2   4   54.09    9.60
  22   2  -4    0.30   55.39
 -20  -2   4   20.90    5.20
  20  -2  -4   22.80    3.40
 -20  -2   4   16.00   10.50
 -20  -2   4   25.20    3.60
  20  -2  -4   11.60    8.70
 -20  -2   4   24.80    5.50
 -20  -2   4   29.10    3.30
  20  -2  -4   24.80    5.60
  20  -2  -4   17.70    4.70
 -20  -2   4   29.20    4.10
  20  -2  -4   17.70    7.40
 -20  -2   4   26.30   11.10
  20   2  -4   24.40    7.60
 -20   2   4   17.60   16.50
  20   2  -4   28.40   18.50
  20   2  -4   23.20    6.50
 -20   2   4   24.50    4.00
 -20   2   4   26.70    7.30
  20   2  -4   28.10    3.30
 -20   2   4   20.20    7.50
  20   2  -4   19.70    6.40
  20   2  -4  -14.10   29.90
 -20   2   4   21.00    3.90
  20   2  -4   13.70    5.90
 -20   2   4   27.50    7.70
  20   2  -4   25.70   12.20
 -18  -2   4   55.89   17.30
 -18  -2   4   66.49    7.10
 -18  -2   4   57.09   10.70
  18  -2  -4   60.59    5.60
  18  -2  -4   63.69    5.10
  18  -2  -4   55.99   15.70
 -18  -2   4   51.29    6.30
  18  -2  -4   57.69    7.00
 -18  -2   4   62.19    5.40
  18  -2  -4   54.09    9.90
 -18   2   4   74.49   10.40
 -18   2   4   54.79    5.80
  18   2  -4   65.89    9.60
  18   2  -4   60.49    5.40
 -18   2   4   28.30   16.70
  18   2  -4   66.99   25.80
  18   2  -4   60.89    8.20
  18   2  -4   55.09    4.70
  18   2  -4   55.59   16.50
  18   2  -4  118.59   43.90
  18   2  -4   45.90    8.60
 -18   2   4   63.49    8.50
  18   2  -4   63.19   10.60
 -18   2   4   61.09    9.40
 -18   2   4   48.60   13.40
 -18   2   4   64.39    5.70
 -18   2   4   82.19   23.70
  16  -2  -4   18.40    5.70
  16  -2  -4    1.90    1.80
 -16  -2   4    3.00    1.30
 -16  -2   4    9.50    3.30
  16  -2  -4    6.30    2.30
  16  -2  -4    2.50    1.60
 -16  -2   4    7.60    4.80
 -16  -2   4    4.80    1.70
  16  -2  -4   10.80    4.10
 -16  -2   4    6.00    2.10
 -16  -2   4    7.80    3.70
  16   2  -4    7.20    3.80
  16   2  -4    3.70   28.00
 -16   2   4   -4.40    9.30
  16   2  -4    1.70    1.30
 -16   2   4    5.80    4.10
 -16   2   4   -6.60    5.90
 -16   2   4   21.80   13.20
 -16   2   4   -0.30    3.30
  16   2  -4    3.30    5.10
  16   2  -4    3.70    3.80
  16   2  -4   14.20    5.70
 -16   2   4    1.90    2.80
 -16   2   4    4.70    1.90
  14  -2  -4   83.89   12.90
  14  -2  -4   61.49    5.10
  14  -2  -4   70.89    6.20
 -14  -2   4   61.89    6.40
 -14  -2   4   57.09    4.80
  14  -2  -4   67.69    8.20
 -14  -2   4   54.29   10.50
 -14  -2   4   58.69    8.60
 -14   2   4   70.99   17.10
 -14   2   4   71.19   13.30
 -14   2   4   54.99    5.10
  14   2  -4   60.59    4.70
  14   2  -4   54.49    7.80
 -14   2   4   51.99    9.00
  14   2  -4   48.40   12.20
  14   2  -4   53.49    4.90
  14   2  -4   61.09    9.40
  14   2  -4   47.60   23.70
  14   2  -4   45.70    9.10
  12  -2  -4  269.67   22.60
  12  -2  -4  259.07   15.10
 -12  -2   4  253.27   19.40
  12  -2  -4  267.57   18.10
 -12  -2   4  232.68   14.20
 -12  -2   4  243.58   19.80
 -12  -2   4  258.87   15.80
  12  -2  -4  234.38   14.10
 -12   2   4  223.68   28.90
 -12   2   4  227.88   21.30
  12   2  -4  195.88   23.50
  12   2  -4  234.78   22.90
  12   2  -4  282.17   40.00
  10  -2  -4   67.99    5.30
  10  -2  -4   73.89    7.80
  10  -2  -4   75.99   11.10
 -10  -2   4   53.19    4.80
 -10  -2   4   62.79    7.90
 -10  -2   4   60.19    8.40
 -10   2   4   43.20   30.20
  10   2  -4   50.59    9.90
  10   2  -4   58.79   13.10
  10   2  -4   62.39   19.30
 -10   2   4   44.80    9.00
 -10   2   4   60.59   13.00
 -10   2   4   62.29   13.80
  -8  -2   4   14.80    3.00
   8  -2  -4   19.00    3.70
  -8  -2   4   19.90    5.30
   8  -2  -4   26.70    2.90
   8  -2  -4   22.70    4.20
   8  -2  -4   27.20    7.20
  -8  -2   4   14.30    4.60
   8   2  -4   25.10    9.70
   8   2  -4    5.30    8.60
  -8   2   4   80.09   28.50
   8   2  -4   19.70    5.80
  -8   2   4   31.20   10.00
  -8   2   4   12.20    6.20
   6  -2  -4  136.09   11.40
  -6  -2   4  123.09   11.20
  -6  -2   4  123.99   12.30
   6  -2  -4   97.29    8.00
  -6  -2   4  111.19    9.90
  -6  -2   4  101.39    8.00
   6  -2  -4  126.09    9.00
   6  -2  -4  124.79    8.40
   6  -2  -4  143.29   14.90
   6   2  -4  100.79   18.10
   6   2  -4  122.29   17.20
  -6   2   4  136.89   17.90
   6   2  -4  121.59   13.80
   6   2  -4   95.29   13.90
  -6   2   4  121.49   15.30
   6   2  -4  111.79    9.90
   4  -2  -4  301.07   17.20
  -4  -2   4  244.68   17.20
  -4  -2   4  284.87   21.40
  -4  -2   4  283.67   18.50
  -4  -2   4  325.47   29.50
   4  -2  -4  246.78   16.40
   4  -2  -4  314.07   25.00
   4  -2  -4  295.97   18.10
   4   2  -4  295.57   26.20
   4   2  -4  290.07   27.50
   4   2  -4  270.27   19.80
  -4   2   4  299.37   24.10
  -4   2   4  316.37   27.80
   4   2  -4  287.47   23.10
   2  -2  -4   85.49    7.20
   2  -2  -4  111.49   13.50
   2  -2  -4   84.19    7.90
  -2  -2   4   81.99   10.10
  -2  -2   4   94.49    9.20
   2  -2  -4   98.39   11.40
   2   2  -4   89.89   12.20
   2   2  -4   74.09    9.80
  -2   2   4  108.09   15.20
   2   2  -4   87.69   16.70
   2   2  -4   81.29   13.30
   2   2  -4   86.79   11.60
  -2   2   4   92.89   11.20
  -2   2   4   93.39   11.20
   2   2  -4   93.29   13.60
   0  -2   4  119.79    9.70
   0  -2  -4  132.89   11.20
   0  -2  -4  126.29   12.30
   0   2  -4  137.59   15.40
   0   2   4  128.69   12.50
   0   2  -4  155.78   16.30
   0   2   4  121.99   14.00
   0   2  -4  134.69   13.10
   0   2  -4  138.29   15.70
   0   2   4  120.89   16.90
   0   2  -4  123.69   13.70
   0   2  -4  143.39   15.30
   0   2  -4  141.79   17.40
  -2  -2  -4  285.57   17.20
   2  -2   4  315.47   20.70
  -2  -2  -4  299.27   18.00
  -2  -2  -4  313.07   21.50
   2  -2   4  321.57   24.10
  -2  -2  -4  316.57   21.60
   2   2   4  311.87   30.10
  -2   2  -4  319.77   26.10
  -2   2  -4  308.57   24.90
  -2   2  -4  339.57   25.60
   2   2   4  310.47   28.80
  -2   2  -4  319.67   26.50
   2   2   4  297.77   23.40
  -2   2  -4  326.47   27.10
  -2   2  -4  317.57   22.20
   2   2   4  294.57   24.70
  -4  -2  -4  266.47   17.20
   4  -2   4  252.27   16.50
   4  -2   4  269.67   20.30
  -4  -2  -4  269.87   18.80
  -4  -2  -4  276.07   15.80
   4  -2   4  270.37   23.40
  -4  -2  -4  266.87   20.50
  -4   2  -4  250.67   21.60
  -4   2  -4  267.47   25.00
   4   2   4  289.87   23.50
  -4   2  -4  303.17   26.20
   4   2   4  283.07   24.40
   4   2   4  322.27   31.30
  -6  -2  -4  111.29   12.20
   6  -2   4  100.29   14.70
  -6  -2  -4  114.69   10.00
   6  -2   4  104.29    7.40
   6  -2   4  120.39   12.50
  -6  -2  -4  109.99    8.00
  -6  -2  -4  123.69   10.80
   6  -2   4  118.39    9.90
  -6   2  -4  134.29   17.80
   6   2   4   89.89   20.40
   6   2   4   92.59   14.00
   6   2   4  127.99   13.40
  -6   2  -4  102.19   11.60
  -6   2  -4  117.59   12.40
   8  -2   4   78.39   17.30
  -8  -2  -4  101.49   10.20
  -8  -2  -4   84.19    6.10
  -8  -2  -4   94.89   12.00
   8  -2   4   86.19    6.90
   8  -2   4   96.79   12.00
   8  -2   4   83.79   10.00
   8   2   4   96.29   24.50
   8   2   4   81.19   14.00
  -8   2  -4   93.39   16.60
  -8   2  -4   91.89   14.80
   8   2   4  106.29   12.20
  10  -2   4  334.67   19.60
  10  -2   4  290.67   20.50
 -10  -2  -4  343.07   18.40
 -10  -2  -4  341.27   24.50
  10  -2   4  328.57   26.20
 -10  -2  -4  331.47   25.60
 -10  -2  -4  336.87   19.80
  10  -2   4  308.67   32.40
  10  -2   4  290.87   25.60
  10  -2   4  303.37   18.10
  10   2   4  302.47   22.20
 -10   2  -4  323.27   33.40
  10   2   4  369.56   47.10
  10   2   4  316.47   28.50
 -10   2  -4  301.67   31.80
  10   2   4  348.57   27.40
 -12  -2  -4   22.70    8.10
  12  -2   4   27.90   11.50
  12  -2   4   38.90    5.10
 -12  -2  -4   36.70    9.30
  12  -2   4   35.40    9.50
  12  -2   4   37.70    4.00
 -12   2  -4   24.10   10.80
  12   2   4   42.60    8.50
  12   2   4   32.30   14.20
  12   2   4   31.10    4.70
 -12   2  -4   35.30    4.40
 -12   2  -4   20.30    6.10
  12   2   4   26.60   10.30
  12   2   4   21.50   20.70
  14  -2   4   27.30   10.80
  14  -2   4   10.50    4.10
  14  -2   4   12.90   11.20
 -14  -2  -4    8.30    5.10
  14  -2   4   12.90    3.40
 -14  -2  -4    9.90    2.80
  14  -2   4   -0.10    8.90
  14  -2   4   13.10    3.00
 -14  -2  -4    8.00    3.20
  14  -2   4    7.50    4.20
 -14  -2  -4    4.40    3.80
 -14  -2  -4   10.00    3.60
 -14  -2  -4    6.10    2.40
  14   2   4   14.20    8.70
 -14   2  -4    6.20    4.30
 -14   2  -4   13.10    3.00
 -14   2  -4    9.30    3.70
 -14   2  -4    2.30    8.10
 -14   2  -4    4.80    5.80
  14   2   4   12.50   10.80
 -14   2  -4    5.20    2.00
  14   2   4    5.50    1.90
  14   2   4   10.90    5.30
  14   2   4    3.60    6.40
  14   2   4   13.10   19.10
 -14   2  -4    7.70    4.00
 -16  -2  -4   68.79   17.20
  16  -2   4   54.39   12.90
 -16  -2  -4   66.19    5.40
  16  -2   4   61.19    7.60
 -16  -2  -4   55.29    6.50
  16  -2   4   50.59    5.20
 -16  -2  -4   43.90   12.40
 -16  -2  -4   55.49    6.60
  16  -2   4   66.59    6.10
 -16  -2  -4   56.89    5.50
  16   2   4   65.29    5.50
  16   2   4   15.40   30.70
  16   2   4   47.60    8.80
 -16   2  -4   58.99    8.80
  16   2   4   48.60   10.80
 -16   2  -4   43.40    9.80
 -16   2  -4   63.39    9.50
 -16   2  -4   57.89   12.90
  16   2   4   52.59    9.60
 -16   2  -4   35.70   17.70
  16   2   4   40.90   17.70
 -16   2  -4   55.09    5.30
 -16   2  -4   63.79    5.70
  18  -2   4   33.20    4.40
  18  -2   4   35.80    6.70
 -18  -2  -4   22.70    8.60
 -18  -2  -4   27.60    5.70
 -18  -2  -4   33.00   13.40
  18  -2   4   30.10   13.30
 -18  -2  -4   35.30    6.00
 -18  -2  -4   36.20    4.40
 -18  -2  -4   40.90    4.30
  18  -2   4   30.40    4.60
 -18  -2  -4   18.00    9.40
  18   2   4   30.80    8.00
  18   2   4   21.80    7.70
 -18   2  -4   35.90    7.90
 -18   2  -4   15.90   18.80
 -18   2  -4   40.60    4.90
 -18   2  -4   43.50   11.00
 -18   2  -4   31.20    4.60
 -18   2  -4   35.50    9.10
  18   2   4   34.50    8.00
  18   2   4   38.10    9.00
  18   2   4   25.50   16.70
 -20  -2  -4   15.80    3.80
  20  -2   4   18.30    6.00
 -20  -2  -4    8.80    6.30
 -20  -2  -4   14.00    3.00
  20  -2   4   -5.80    9.60
 -20  -2  -4   19.50    5.00
  20  -2   4   15.80    4.00
 -20  -2  -4   11.10    9.70
 -20  -2  -4    6.90    4.00
 -20  -2  -4   -8.30   10.40
  20  -2   4   14.50    3.60
  20   2   4    7.90    6.10
 -20   2  -4   -1.40   24.70
  20   2   4   15.60    5.90
 -20   2  -4   10.60    6.00
  20   2   4    8.90    5.20
  20   2   4   12.90    5.00
 -20   2  -4   18.60    6.40
 -20   2  -4   17.60    3.90
 -20   2  -4   15.00    5.90
  20   2   4  -73.49   52.39
  22  -2   4   32.80    7.50
  22  -2   4   38.70    8.10
 -22  -2  -4   55.99    8.90
 -22  -2  -4   45.00    5.80
 -22  -2  -4   53.49    8.50
 -22  -2  -4   48.30    5.10
  22  -2   4   51.19    6.10
 -22   2  -4   61.39    7.50
  22   2   4   42.90    8.70
 -22   2  -4   59.19   12.30
  22   2   4   54.89   12.50
  22   2   4   55.09    7.90
 -22   2  -4   31.90   11.20
 -24  -2  -4   35.30    5.20
  24  -2   4   37.90    5.00
 -24  -2  -4   31.40    5.70
  24  -2   4   37.10    7.70
  24  -2   4   29.60    5.90
  24  -2   4   33.40    4.20
 -24   2  -4   18.70    7.40
  24   2   4   36.10    8.50
  24   2   4   24.30    6.00
 -24   2  -4   29.70    7.50
 -24   2  -4   38.10    6.40
  24   2   4   35.10    6.80
 -24   2  -4   30.20    4.30
 -24   2  -4   32.20    6.40
 -26  -2  -4    2.70    2.30
 -26  -2  -4    5.40    3.70
  26  -2   4    7.40    6.10
  26  -2   4    8.30    2.50
 -26   2  -4    7.90    3.90
  26   2   4    1.50    2.40
 -26   2  -4    3.20    2.50
 -26   2  -4    3.90    4.00
 -26   2  -4    8.80    3.60
  26   2   4    0.80    3.70
 -26   2  -4    4.90    2.70
  28  -2   4    6.50    2.70
 -28  -2  -4   11.30    3.20
  28  -2   4    7.10    3.20
  28  -2   4   11.00    1.80
 -28  -2  -4   10.80    2.90
  28   2   4    7.40    3.20
 -28   2  -4    9.00    3.30
  28   2   4    6.50    2.70
 -28   2  -4   10.10    3.90
  28   2   4    4.70    2.70
 -28   2  -4    3.60    2.70
  29  -3  -4    7.70    1.70
 -29  -3   4    9.90    2.90
  29  -3  -4    5.80    2.20
 -29   3   4    8.40    2.30
  29   3  -4   12.60    2.70
  29   3  -4    9.90    2.90
  29   3  -4    6.80    3.60
  27  -3  -4    4.50    1.70
  27  -3  -4    4.80    2.30
 -27  -3   4    4.40    1.90
 -27  -3   4    2.10    1.50
  27  -3  -4   -5.60    5.50
  27  -3  -4    2.70    2.30
 -27   3   4    3.90    2.60
  27   3  -4    0.80    2.50
  27   3  -4    2.90    3.00
 -27   3   4    2.90    3.10
 -27   3   4    3.20    2.90
  27   3  -4    2.30    2.30
 -27   3   4   -1.30    3.90
 -27   3   4    3.70    1.70
  25  -3  -4    9.20    3.30
  25  -3  -4   13.00    2.50
 -25  -3   4   14.80    3.40
 -25  -3   4   11.20    3.40
  25  -3  -4    9.20    3.80
  25  -3  -4   11.60    3.00
 -25  -3   4   12.40    2.60
 -25  -3   4    8.30    2.20
  25   3  -4    9.10    4.50
 -25   3   4   16.00    5.50
  25   3  -4   11.00    4.30
  25   3  -4    4.70    4.50
 -25   3   4   12.30    2.80
 -25   3   4    7.40    2.60
 -25   3   4   10.70    4.30
 -25   3   4   18.60    5.40
 -25   3   4    6.30    4.90
 -23  -3   4   26.80    3.50
  23  -3  -4   33.90    6.70
 -23  -3   4   15.20    4.70
  23  -3  -4   18.20    4.60
  23  -3  -4   28.20    3.80
 -23  -3   4   22.90    4.20
 -23  -3   4   26.30    4.30
 -23  -3   4   26.30    6.40
  23  -3  -4   23.70    3.50
  23   3  -4   18.30    6.40
 -23   3   4   21.40    8.10
  23   3  -4   21.90    8.10
  23   3  -4   25.50    6.30
  23   3  -4   25.40    3.50
 -23   3   4   24.30    3.70
 -23   3   4   29.70    4.00
 -23   3   4   23.40    7.20
 -23   3   4   30.20    7.50
 -23   3   4   42.30    6.80
  23   3  -4   20.50    6.20
 -21  -3   4   60.49    5.00
 -21  -3   4   52.09    5.50
  21  -3  -4   49.40   23.40
  21  -3  -4   54.99    5.50
  21  -3  -4   54.29    5.20
 -21  -3   4   43.20    7.50
 -21  -3   4   44.20    8.00
 -21  -3   4   57.09    5.50
  21  -3  -4   51.59    7.50
 -21   3   4   57.29    5.80
 -21   3   4   53.79   12.20
  21   3  -4   58.89    9.60
  21   3  -4   46.70   10.90
  21   3  -4   55.49    9.00
 -21   3   4   56.99    5.50
  21   3  -4   39.50   49.20
  21   3  -4   57.59    5.00
 -21   3   4    5.40   25.80
 -21   3   4   67.49   10.10
 -21   3   4   52.79    9.40
 -19  -3   4   20.00    7.70
  19  -3  -4   29.60    5.60
  19  -3  -4   26.70    3.50
  19  -3  -4   25.00   10.30
  19  -3  -4   41.60   13.00
 -19  -3   4   27.70    5.50
 -19  -3   4   21.50    5.80
  19  -3  -4   33.50    4.50
 -19  -3   4   33.30    4.40
 -19   3   4   26.30    4.90
  19   3  -4   -1.80   16.90
 -19   3   4   14.90   11.40
 -19   3   4   17.90    5.60
 -19   3   4   43.30   13.10
  19   3  -4   22.70    7.40
  19   3  -4   38.10    7.50
  19   3  -4   33.20    3.50
 -19   3   4   20.80    8.90
  19   3  -4   19.80    8.30
  19   3  -4   53.39   36.10
 -19   3   4   33.40    4.30
 -19   3   4   28.90    8.10
  19   3  -4   34.60    3.90
 -19   3   4   14.30   16.40
 -17  -3   4   10.60    4.00
 -17  -3   4    2.60    1.40
 -17  -3   4    5.00    4.90
  17  -3  -4    0.50    9.10
  17  -3  -4    4.00    1.80
 -17  -3   4   -0.80   11.10
  17  -3  -4    1.70    1.90
 -17  -3   4    2.60    1.50
 -17   3   4   -3.70   10.00
  17   3  -4    2.90    1.40
 -17   3   4   -1.40    3.70
  17   3  -4    5.80   25.00
  17   3  -4    2.50    3.30
  17   3  -4   15.30    5.80
  17   3  -4    8.40    5.30
  17   3  -4   -3.80   13.50
 -17   3   4    7.60    3.00
 -17   3   4    0.50    5.70
 -17   3   4   -1.60    4.50
  17   3  -4    4.50    1.50
 -17   3   4   -4.50   14.40
 -17   3   4    7.20    7.60
  15  -3  -4  111.39    9.00
 -15  -3   4  106.89    7.40
  15  -3  -4   95.89    7.50
 -15  -3   4  107.89    8.50
 -15  -3   4  114.69    9.70
 -15  -3   4  113.49    7.80
  15  -3  -4  110.09   14.60
 -15  -3   4  113.19   13.10
 -15  -3   4   76.29   16.00
  15  -3  -4   97.19    7.40
  15   3  -4   88.19   12.40
 -15   3   4   98.59    9.70
  15   3  -4  116.99    7.50
  15   3  -4  118.99    7.50
  15   3  -4   90.59   14.00
 -15   3   4   91.89   25.60
 -15   3   4  101.49   15.40
  15   3  -4   60.39   24.70
 -15   3   4   96.69    7.70
 -15   3   4   93.59   15.80
 -15   3   4  121.89   12.40
 -15   3   4   95.29   24.10
 -15   3   4   99.99   11.90
  15   3  -4   88.49   12.80
  15   3  -4  109.69   11.70
  15   3  -4   86.89   35.50
 -13  -3   4   19.90    6.20
 -13  -3   4   27.80    4.50
 -13  -3   4   28.00    4.50
  13  -3  -4   30.20    4.20
 -13  -3   4   36.10    9.90
 -13  -3   4   28.10    3.50
  13  -3  -4   34.90   13.20
 -13  -3   4   20.20    3.80
  13  -3  -4   29.90    6.60
  13   3  -4  -15.20   21.60
 -13   3   4   18.20    9.20
 -13   3   4   24.10    6.40
  13   3  -4   28.00    3.40
 -13   3   4   15.80    6.00
  13   3  -4   25.10    7.60
 -13   3   4   31.50   11.30
  13   3  -4   36.90    7.90
  13   3  -4   37.80    7.60
 -13   3   4   31.50    3.90
  13   3  -4   27.80    3.20
  13   3  -4   21.10   17.40
 -13   3   4   43.50    9.10
 -13   3   4   19.60    6.90
 -11  -3   4  110.19    7.20
 -11  -3   4  103.39   12.00
  11  -3  -4  102.69    7.60
  11  -3  -4   88.79    6.80
 -11  -3   4  107.19    8.50
  11  -3  -4  119.29   16.30
  11  -3  -4  106.49   11.20
 -11  -3   4  118.59   12.60
 -11   3   4   87.09   28.40
  11   3  -4   79.69   10.30
 -11   3   4  154.58   23.70
  11   3  -4  104.89    7.40
  11   3  -4  116.99   13.50
 -11   3   4   92.29    7.70
  11   3  -4   96.79   23.70
 -11   3   4   68.59   17.40
 -11   3   4   99.09   10.80
 -11   3   4   88.39   14.40
  11   3  -4  110.39   28.70
  11   3  -4   71.69   22.50
  11   3  -4  109.69   21.10
 -11   3   4   86.29   11.60
  11   3  -4   88.89   12.30
 -11   3   4   87.09    7.90
  11   3  -4  100.19    7.20
  -9  -3   4    7.90    3.80
   9  -3  -4    8.10    5.40
  -9  -3   4   10.60    2.90
   9  -3  -4   10.00    2.40
   9  -3  -4   10.60    4.20
  -9  -3   4    9.50    2.30
  -9  -3   4   12.00    4.70
  -9   3   4    0.50    5.40
   9   3  -4    5.10   10.60
   9   3  -4    1.80    8.40
   9   3  -4    6.80    8.70
   7  -3  -4   40.30    5.70
   7  -3  -4   37.30    5.00
   7  -3  -4   40.20   10.90
  -7  -3   4   40.70    8.10
  -7  -3   4   35.70    6.70
   7  -3  -4   34.20    3.60
   7  -3  -4   41.10    7.10
  -7  -3   4   37.80    8.60
  -7  -3   4   32.60    4.80
   7   3  -4   18.80    9.30
  -7   3   4   24.50    9.30
   7   3  -4   22.40    9.60
  -7   3   4   46.50   14.20
  -5  -3   4   71.69   10.50
   5  -3  -4   62.49    6.10
  -5  -3   4   60.49    9.40
   5  -3  -4   57.89    4.70
   5  -3  -4   75.29   13.20
  -5  -3   4   51.89    7.80
   5  -3  -4   61.69    9.20
   5  -3  -4   64.69    6.80
  -5  -3   4   51.89    5.50
   5   3  -4   64.29   15.00
  -5   3   4   69.59   13.30
   5   3  -4   79.09   16.40
   5   3  -4   55.99   14.50
  -5   3   4   65.39   15.80
  -3  -3   4  426.46   31.20
   3  -3  -4  368.46   23.00
   3  -3  -4  462.55   37.60
  -3  -3   4  505.05   28.30
  -3  -3   4  448.56   27.40
   3  -3  -4  435.36   25.60
   3  -3  -4  377.46   32.10
  -3  -3   4  443.36   30.80
   3  -3  -4  420.76   26.90
   3   3  -4  465.65   39.80
  -3   3   4  415.06   34.40
   3   3  -4  351.56   34.00
   3   3  -4  434.56   30.30
  -3   3   4  413.46   33.50
  -3   3   4  433.06   40.40
   3   3  -4  450.95   31.40
  -1  -3   4 1249.47   73.29
   1  -3  -4 1361.86   80.49
   1  -3  -4 1403.56   77.19
   1  -3  -4 1363.36   88.89
   1  -3  -4 1295.67   71.59
  -1  -3   4 1412.46   78.89
  -1  -3   4 1502.35   82.39
  -1   3   4 1430.46   85.69
   1   3  -4 1387.66   86.49
   1   3  -4 1403.36   87.19
  -1   3   4 1393.26   92.39
   1   3  -4 1527.75   89.59
  -1   3   4 1372.26   83.29
  -1  -3  -4  703.63   43.30
   1  -3   4  735.93   46.30
  -1  -3  -4  703.13   43.30
   1  -3   4  676.03   40.40
  -1  -3  -4  647.94   36.80
  -1   3  -4  746.23   53.09
  -1   3  -4  647.44   50.29
  -1   3  -4  702.23   51.19
   1   3   4  648.44   45.40
   1   3   4  718.73   56.89
   1   3   4  737.83   50.99
  -3  -3  -4   35.70    5.10
  -3  -3  -4   40.30    7.30
   3  -3   4   43.40    6.90
  -3  -3  -4   47.60    4.20
  -3  -3  -4   36.10    7.60
   3  -3   4   20.80    9.00
  -3   3  -4   30.60   10.90
  -3   3  -4   60.49   12.50
  -3   3  -4   32.20   12.30
   3   3   4   39.90   11.50
   3   3   4   32.90   13.50
   5  -3   4  197.88   25.10
   5  -3   4  139.59    9.60
[truncated: 1,100,234 more chars]
